# Supplementary material for: AcetyLeish: acetylation-driven control of stage differentiation and virulence in Leishmania mexicana
Source: Research Square preprint supplement (doi:10.21203/rs.3.rs-7520632/v1), 2025-09-17
Supplement: Supplementary file 1 [file 05dc16b7633514f1ce9e3c59.xlsx]

## Sheet: Dac1vscontrol
Protein accession	Position	Amino acid	Dac1/control Ratio	Dac1/control P value	Regulated Type	Protein description	Gene name	Localization probability	PEP	Score	Charge	Modified sequence	Mass error [ppm]	Intensity Dac1_1	Intensity Dac1_2	Intensity Dac1_3	Intensity WT_1	Intensity WT_2	Intensity WT_3	Intensity Cas9_1	Intensity Cas9_2	Intensity Cas9_3	Intensity Dac3_1	Intensity Dac3_2	Intensity Dac3_3	Intensity Dac4_1	Intensity Dac4_2	Intensity Dac4_3	Intensity Dac5_1	Intensity Dac5_2	Intensity Dac5_3	Dac1_1	Dac1_2	Dac1_3	WT_1	WT_2	WT_3	Cas9_1	Cas9_2	Cas9_3	Dac3_1	Dac3_2	Dac3_3	Dac4_1	Dac4_2	Dac4_3	Dac5_1	Dac5_2	Dac5_3
LmxM.01.0490	64	K	0.44384	6.8079e-05	Down	long-chain-fatty-acid-CoA ligase, putative OS=Leishmania_mexicana_MHOM/GT/2001/U1103 GN=LmxM.01.0490	LmxM.01.0490	1	1.12379e-26	183.57	2	STLAEQQECAK(1)R	0.46986	14204	13794	16001	34396	36464	31978	36417	41643	40810	16558	16473	19863	24976	22064	23252	0	0	0	0.589355	0.555234	0.64952	1.20029	1.27173	1.07373	1.39223	1.57569	1.57082	0.702235	0.680653	0.791791	1.02759	0.899064	0.958328
LmxM.02.0450	27	K	0.205458	8.50094e-06	Down	voltage-dependent anion-selective channel, putative OS=Leishmania_mexicana_MHOM/GT/2001/U1103 GN=LmxM.02.0450	LmxM.02.0450	1	3.48594e-35	178.52	2	NFSSCGAWK(1)VESK	0.23793	0	19654	26087	135730	139790	139810	146170	133990	140700	63168	54780	60270	136780	124020	133100	40343	0	42042		0.228167	0.305645	1.14464	1.16043	1.18178	1.51969	1.34921	1.43874	0.693728	0.56985	0.638092	1.45101	1.30972	1.37408	0.490044		0.485803
LmxM.02.0450	194	K	0.291251	2.46232e-08	Down	voltage-dependent anion-selective channel, putative OS=Leishmania_mexicana_MHOM/GT/2001/U1103 GN=LmxM.02.0450	LmxM.02.0450	1	3.68623e-32	140.01	2	SLDVTASMISK(1)AALHPK	-4.7057	80065	75646	71989	355090	358820	332690	315070	278190	322180	82352	100440	83947	141980	120200	127630	31444	0	52711	0.513868	0.489211	0.46986	1.66817	1.65931	1.56657	1.82479	1.56048	1.83525	0.50382	0.582043	0.495104	0.839041	0.707135	0.733998	0.212772		0.339303
LmxM.03.0080	97	K	0.603154	0.00211747	Down	glycerol-3-phosphate acyl transferase OS=Leishmania_mexicana_MHOM/GT/2001/U1103 GN=LmxM.03.0080	LmxM.03.0080	1	6.85306e-59	174.02	2	TEGK(1)LIVGAGTHFSR	-1.0932	136240	136320	146500	201550	206240	215170	304700	303720	302680	310150	322700	346730	462180	445430	470130	213090	219670	229120	0.545563	0.550859	0.61008	0.727368	0.754607	0.787466	1.13878	1.11682	1.13356	0.905932	0.955644	1.02505	2.07765	2.06474	2.23675	0.682272	0.704581	0.729548
LmxM.05.0750	433	K	0.640182	0.000251723	Down	Flavodoxin/Radical SAM superfamily/Wyosine base formation, putative OS=Leishmania_mexicana_MHOM/GT/2001/U1103 GN=LmxM.05.0750	LmxM.05.0750	1	6.26572e-216	211.64	3	GGCYK(1)HTFYNINSSQCMEMTPSLACANK	1.3586	165310	165470	158150	150010	156750	160960	216240	0	227490	290050	303910	293790	361610	344470	342370	193670	197860	201830	0.706104	0.692457	0.65289	0.970627	1.02424	1.02025	1.09344		1.23224	0.946713	0.970168	0.965538	1.61742	1.63463	1.62652	0.661978	0.751819	0.738574
LmxM.08.0220	837	K	0.312287	1.47108e-05	Down	ubiquitin-activating enzyme-like protein OS=Leishmania_mexicana_MHOM/GT/2001/U1103 GN=LmxM.08.0220	LmxM.08.0220	1	9.01065e-15	127.93	2	MYGAAEGGGK(1)AGR	0.27365	19409	23033	0	71397	65978	65359	70901	70486	70428	60034	61251	59125	94385	97323	91584	75805	77337	74949	0.295304	0.351998		0.951981	0.932428	0.916684	1.13008	1.14079	1.14637	0.944523	1.00366	0.970034	1.45786	1.50218	1.48925	0.976973	0.963013	0.937858
LmxM.08.0320	72	K	0.504593	0.0108147	Down	mitochondrial associated ribonuclease, putative OS=Leishmania_mexicana_MHOM/GT/2001/U1103 GN=LmxM.08.0320	LmxM.08.0320	1	1.41231e-16	141.87	3	HSTFVVTEQYPK(1)GVGHVAK	1.9062	63329	68476	79947	69724	75155	69715	181810	189590	185040	0	68926	70219	167550	155840	134670	204720	217410	220060	0.525922	0.537689	0.647151	0.717169	0.775141	0.73017	1.40229	1.67855	1.47744		0.59561	0.607742	1.42891	1.32307	1.11122	0.990897	1.07391	1.08124
LmxM.08_29.2510	87	K	0.342129	0.00021663	Down	ATP-dependent 6-phosphofructokinase, glycosomal OS=Leishmania_mexicana_MHOM/GT/2001/U1103 GN=LmxM.08_29.2510	LmxM.08_29.2510	1	1.11643e-105	121.65	3	K(1)HLHFNPSETSIGIVTCGGICPGLNDVIR	4.5787	46234	36525	31588	126450	0	76745	116090	111980	119540	0	17071	0	48526	0	21589	0	31541	33467	0.713611	0.569085	0.480321	2.09654		1.27875	1.72376	1.69297	1.79644		0.298779		0.767766		0.350128		0.483516	0.517944
LmxM.08_29.2510	352	K	0.274846	6.20134e-06	Down	ATP-dependent 6-phosphofructokinase, glycosomal OS=Leishmania_mexicana_MHOM/GT/2001/U1103 GN=LmxM.08_29.2510	LmxM.08_29.2510	1	0.000222735	90.761	2	LIDIGFILK(1)K	-1.0048	38541	62366	53148	153860	165560	162070	201360	217920	199570	0	26383	30746	84634	75823	60924	71645	65119	46605	0.370466	0.605146	0.503293	1.58867	1.70972	1.68176	1.862	2.05178	1.86775		0.287568	0.333334	0.833919	0.757198	0.615329	0.678896	0.621681	0.449183
LmxM.10.0290	81	K	0.227391	0.0110099	Down	isocitrate dehydrogenase [NADP] OS=Leishmania_mexicana_MHOM/GT/2001/U1103 GN=LmxM.10.0290	LmxM.10.0290	1	2.17169e-22	146.48	2	DATNDK(1)VTAEAAEAIK	0.44479	21796	24345	24137	0	69058	38692	142880	138780	140540	31959	37372	36180	72561	65210	60500	38345	44826	51093	0.367649	0.40927	0.399999		1.09551	0.58368	2.34085	2.28292	2.32327	0.498305	0.591044	0.574606	1.22318	1.11156	1.03714	0.635764	0.787906	0.840905
LmxM.14.0140	121	K	0.0812425	2.30379e-05	Down	histone acetyltransferase, putative OS=Leishmania_mexicana_MHOM/GT/2001/U1103 GN=LmxM.14.0140	LmxM.14.0140	1	1.38214e-258	271.6	3	AATAVLTGEGAGMSTEVSANAK(1)GGGAAPHLVK(1)VSK(1)TR	-0.28184	154520	0	134590	980080	730310	710560	737420	973960	845030	39911	73543	47635	577610	207480	270310	0	0	0	0.253101		0.220126	2.81753	2.22034	1.95536	2.77	4.07844	3.63294	0.0423525	0.0889924	0.059249	2.26979	0.833442	0.88987
LmxM.14.0140	131	K	0.0812425	2.30379e-05	Down	histone acetyltransferase, putative OS=Leishmania_mexicana_MHOM/GT/2001/U1103 GN=LmxM.14.0140	LmxM.14.0140	1	1.38214e-258	271.6	3	AATAVLTGEGAGMSTEVSANAK(1)GGGAAPHLVK(1)VSK(1)TR	-0.28184	154520	0	134590	980080	730310	710560	737420	973960	845030	39911	73543	47635	577610	207480	270310	0	0	0	0.253101		0.220126	2.81753	2.22034	1.95536	2.77	4.07844	3.63294	0.0423525	0.0889924	0.059249	2.26979	0.833442	0.88987
LmxM.14.0140	134	K	0.105233	0.000162457	Down	histone acetyltransferase, putative OS=Leishmania_mexicana_MHOM/GT/2001/U1103 GN=LmxM.14.0140	LmxM.14.0140	1	1.38214e-258	271.6	3	AATAVLTGEGAGMSTEVSANAK(1)GGGAAPHLVK(1)VSK(1)TR	-0.28184	154520	0	134590	668150	528160	496600	598530	828070	670340	39911	73543	47635	483880	207480	243510	0	0	0	0.317076		0.275767	2.40631	2.01162	1.712	2.81657	4.344	3.61037	0.0530578	0.111487	0.0742251	2.38209	1.04411	1.00427
LmxM.17.0050	166	K	0.597082	0.00787073	Down	hypothetical protein, conserved OS=Leishmania_mexicana_MHOM/GT/2001/U1103 GN=LmxM.17.0050	LmxM.17.0050	1	3.60949e-80	205.26	2	VLVDDASEQPPAK(1)SAR	-1.0364	156940	130010	136140	237760	236070	239140	215600	206790	196700	191360	197640	200220	320510	299830	300340	216980	224610	241770	0.672197	0.629112	0.536898	0.851722	1.03058	0.82419	1.50234	0.96188	0.986593	0.813506	0.708333	0.877074	1.88168	1.79543	1.69556	0.967428	1.04441	1.19607
LmxM.17.0140	98	K	0.155663	2.44387e-07	Down	peptidase t, putative OS=Leishmania_mexicana_MHOM/GT/2001/U1103 GN=LmxM.17.0140	LmxM.17.0140	1	8.77379e-167	208.01	3	IGFICHLDTFDCGLCPHVK(1)AQK	-0.16549	153810	144220	134560	857440	857400	852520	1275600	1263000	1245400	281380	312870	289610	1116400	1084900	1106500	326620	373730	412930	0.243912	0.218057	0.201885	1.24021	1.23446	1.14423	1.67042	1.64242	1.59764	0.448363	0.48011	0.462791	1.62608	1.60431	1.61191	0.564522	0.649158	0.713564
LmxM.17.0725	356	K	0.504762	0.000259334	Down	GMP reductase OS=Leishmania_mexicana_MHOM/GT/2001/U1103 GN=LmxM.17.0725	LmxM.17.0725	1	2.16293e-14	102.55	2	HGVPCIADGGVK(1)TAGDICK	0.71943	29516	27905	32802	85947	82024	86719	51749	50543	53047	30787	30902	31466	49908	52681	52030	0	0	0	0.573271	0.550452	0.639958	1.41151	1.35548	1.38615	0.941159	0.925041	0.968826	0.622006	0.603602	0.626355	0.970364	1.02399	1.03653
LmxM.17.0725	62	K	0.483848	2.43772e-05	Down	GMP reductase OS=Leishmania_mexicana_MHOM/GT/2001/U1103 GN=LmxM.17.0725	LmxM.17.0725	1	4.21545e-79	115.29	2	IPIVASNMDTVCEDK(1)TAVTMAR	-0.80978	74586	65629	59252	151620	150040	148500	157840	166300	156600	35147	47744	43988	83755	76422	77154	0	0	19825	0.763245	0.682083	0.609058	1.31194	1.30636	1.25062	1.51245	1.6036	1.50689	0.374128	0.491346	0.461336	0.857985	0.782646	0.809824			0.336025
LmxM.17.1290	84	K	0.577899	0.00146715	Down	eukaryotic translation initiation factor 3 subunit b OS=Leishmania_mexicana_MHOM/GT/2001/U1103 GN=LmxM.17.1290	LmxM.17.1290	1	9.6798e-45	168.05	3	LNRFPFTK(1)SAVLTTYR	-0.027949	46212	48596	47938	70089	64460	66205	90064	94664	93046	68874	84731	78234	41840	43847	52467	26237	25442	26635	0.795355	0.826722	0.804413	1.19006	1.09079	1.13445	1.60827	1.68984	1.68423	1.02516	1.27284	1.1862	0.660252	0.687134	0.839848	0.491503	0.479189	0.496419
LmxM.18.0510	279	K	0.406354	0.0034305	Down	aconitase, putative OS=Leishmania_mexicana_MHOM/GT/2001/U1103 GN=LmxM.18.0510	LmxM.18.0510	1	4.28992e-74	182.22	3	LQEGCTATDLVLTVAK(1)NLRK	-2.7257	63915	101550	115530	170200	160330	0	297870	301230	186920	68789	83762	76268	84292	43272	42011	82479	85544	90954	0.517994	0.811052	0.925212	1.56315	1.47987		2.31971	2.39006	1.49308	0.554868	0.681787	0.62232	0.709014	0.362596	0.356611	0.657734	0.690335	0.747436
LmxM.21.0250	276	K	0.34725	0.000188273	Down	hexokinase, putative OS=Leishmania_mexicana_MHOM/GT/2001/U1103 GN=LmxM.21.0250	LmxM.21.0250	1	1.07099e-59	118.87	2	GNAVTPINMECGNFDSK(1)YK	-0.9278	43876	0	38637	138120	147660	148200	191180	191380	190640	51586	60145	0	73694	69726	72178	39125	39526	38604	0.534844		0.479512	1.20227	1.2899	1.26062	1.66603	1.66828	1.67624	0.638486	0.735592		0.851821	0.816638	0.840497	0.403229	0.412843	0.396207
LmxM.23.1220	308	K	0.412035	0.00608353	Down	T-complex protein 1, gamma subunit, putative OS=Leishmania_mexicana_MHOM/GT/2001/U1103 GN=LmxM.23.1220	LmxM.23.1220	1	1.44173e-16	118.87	3	GASDLAAHFLYK(1)AGITCIR	-1.7282	31722	36021	34999	0	48780	0	69060	94858	84165	15891	18767	35320	24736	23801	0	27551	24091	0	0.748917	0.833785	0.811671		1.23194		1.77956	2.51622	2.2204	0.338723	0.405097	0.780014	0.599904	0.581748		0.76476	0.669939
LmxM.24.0761	314	K	0.57898	0.0130818	Down	malic enzyme OS=Leishmania_mexicana_MHOM/GT/2001/U1103 GN=LmxM.24.0761	LmxM.24.0761	1	8.58017e-86	153.56	2	IVVFGAGSAAVGVAK(1)NIAQLASR	-1.727	56997	68232	96938	135410	89019	71695	129160	121260	111290	10197	3458.8	5268.4	9970.1	0	9681	8206.5	12596	22794	0.973773	1.15757	1.69699	2.90656	1.92856	1.54046	2.43541	2.29804	2.11536	0.160409	0.0535001	0.0802132	0.177004		0.171199	0.134369	0.206153	0.374958
LmxM.24.0770	569	K	0.58361	0.0048195	Down	malic enzyme, putative OS=Leishmania_mexicana_MHOM/GT/2001/U1103 GN=LmxM.24.0770	LmxM.24.0770	1	0.000669642	80.623	2	YLPENYYLEK(1)DFIS	1.0279	158970	146750	132080	257670	243890	0	0	0	0	19937	0	0	200880	0	165000	0	0	0	0.989668	0.908157	0.820601	1.58589	1.51941					0.106947			1.19845		1.01667
LmxM.26.0430	138	K	0.480597	0.0049413	Down	nucleotide binding protein-like protein OS=Leishmania_mexicana_MHOM/GT/2001/U1103 GN=LmxM.26.0430	LmxM.26.0430	1	2.48682e-08	88.42	2	VMSIAYLLPSDK(1)DAVVWR	3.2245	25656	0	30055	43967	45564	42599	82749	79339	69862	0	0	0	50361	27335	38851	14793	0	0	0.567527		0.66629	0.93368	0.954465	0.882466	1.79121	1.67593	1.46402				0.98938	0.552523	0.78262	0.357239
LmxM.27.0860	855	K	0.632214	0.0012371	Down	WD domain, G-beta repeat, putative OS=Leishmania_mexicana_MHOM/GT/2001/U1103 GN=LmxM.27.0860	LmxM.27.0860	1	0.00520687	75.243	2	VLMPSK(1)VR	0.80104	0	55589	56647	0	70356	69715	0	0	0	43839	43146	0	65850	65053	0	0	0	32819		0.784031	0.802284		1.26875	1.24039				0.897107	0.893252		1.30041	1.28794				0.556257
LmxM.27.1805	304	K	0.237506	6.65802e-07	Down	Phosphoenolpyruvate carboxykinase [ATP], glycosomal OS=Leishmania_mexicana_MHOM/GT/2001/U1103 GN=LmxM.27.1805	LmxM.27.1805	1	1.40521e-42	157.67	2	HEIDFNDESISK(1)NTR	-1.8745	50391	57978	53909	222410	223710	222940	214300	0	222910	60453	57859	63397	144400	141730	151190	139320	140000	135870	0.340579	0.390462	0.368938	1.40876	1.45827	1.42743	1.65984		1.76467	0.56236	0.5474	0.597364	1.2345	1.22677	1.31699	0.876432	0.873135	0.8605
LmxM.28.2510	254	K	0.538325	0.000852086	Down	acyl-CoA dehydrogenase, putative OS=Leishmania_mexicana_MHOM/GT/2001/U1103 GN=LmxM.28.2510	LmxM.28.2510	1	2.8594e-18	97.268	2	LPNSLPSTK(1)GLSLFLVPR	-0.36107	58115	63018	78545	99241	114060	0	160560	155740	147060	0	76010	79710	113070	68198	71121	127930	128060	140260	0.620044	0.656842	0.828066	1.05149	1.24109		1.4499	1.41078	1.36373		0.861668	0.908924	1.14604	0.709744	0.738001	0.853656	0.870912	0.975612
LmxM.29.1040	161	K	0.190924	0.0185609	Down	succinate dehydrogenase subunit 7 OS=Leishmania_mexicana_MHOM/GT/2001/U1103 GN=LmxM.29.1040	LmxM.29.1040	0.999992	5.50387e-10	117.99	2	KLNYLK(1)NILFWAGR	-1.0631	0	8054.5	9787.8	22415	0	24687	65912	69028	66858	6196.7	10283	7515.3	17161	16684	0	0	0	0		0.290425	0.350562	0.730613		0.820285	2.22646	2.35858	2.25727	0.231876	0.393218	0.28776	0.637846	0.632897
LmxM.31.1960	118	K	0.507693	0.00018917	Down	1-acyl-sn-glycerol-3-phosphateacyltransferase-like protein, putative OS=Leishmania_mexicana_MHOM/GT/2001/U1103 GN=LmxM.31.1960	LmxM.31.1960	1	1.12084e-16	163.43	2	DGTWIAK(1)AGLFR	-1.7549	247760	256020	0	414310	431010	424890	537270	580150	589530	293730	324690	312820	514020	455900	448430	176890	181270	178560	0.664424	0.715027		1.13643	1.16814	1.13178	1.45519	1.61735	1.6424	0.710434	0.824782	0.782693	1.34439	1.18973	1.10003	0.497727	0.553421	0.484791
LmxM.31.2950	57	K	0.283822	5.8677e-05	Down	nucleoside diphosphate kinase b OS=Leishmania_mexicana_MHOM/GT/2001/U1103 GN=LmxM.31.2950	LmxM.31.2950	1	6.70716e-06	108.4	2	DLSSK(1)PFFPALVK	-0.9638	122940	139910	0	326250	311810	302600	550630	551600	468090	239170	232500	0	381920	369970	375320	162780	172220	178480	0.396249	0.439059		1.15162	1.12108	1.07821	1.89425	1.9324	1.65165	0.785719	0.778807		1.28502	1.27582	1.2849	0.461914	0.490287	0.506439
LmxM.31.3270	516	K	0.44045	0.0197036	Down	chaperonin alpha subunit, putative OS=Leishmania_mexicana_MHOM/GT/2001/U1103 GN=LmxM.31.3270	LmxM.31.3270	1	4.21883e-32	127.07	2	VK(1)SLQFATEAAVTVLR	-0.89752	35842	30235	27898	70880	78096	73510	34987	35029	93244	15598	21358	14448	27848	22540	26371	0	0	0	0.830289	0.696653	0.646604	1.73118	1.94475	1.81382	0.915729	0.937394	2.52679	0.32656	0.454547	0.308231	0.664017	0.54242	0.646901
LmxM.32.0830	717	K	0.450514	0.0293735	Down	2,4-dienoyl-coa reductase fadh1, putative OS=Leishmania_mexicana_MHOM/GT/2001/U1103 GN=LmxM.32.0830	LmxM.32.0830	0.999455	7.57619e-08	110.06	3	K(0.001)LDAK(0.999)MAILQAHSVAIR	-1.295	38339	0	28486	0	84448	0	112510	111430	124500	33276	41552	30802	71127	64697	0	0	44044	59517	0.672387		0.508875		0.828515		1.43061	1.40771	1.57723	0.738102	0.893125	0.674974	1.35677	1.22934			0.813617	1.08554
LmxM.32.3090	125	K	0.405408	1.42241e-07	Down	Holliday-junction resolvase-like of SPT6/SH2 domain containing protein, putative OS=Leishmania_mexicana_MHOM/GT/2001/U1103 GN=LmxM.32.3090	LmxM.32.3090	1	1.38352e-70	172.92	2	LEQTGLGK(1)TTESAVR	-2.0056	72466	66686	62739	64315	63205	59869	167530	167120	170190	112510	110720	110820	148800	137190	144700	62316	62168	66517	0.66587	0.616629	0.593992	1.50405	1.54281	1.38169	1.6059	1.57427	1.64857	1.04051	1.02703	1.00994	1.78434	1.69936	1.8075	0.354092	0.366168	0.389263
LmxM.33.0610	253	K	0.359926	0.0205508	Down	enoyl-[acyl-carrier-protein] reductase, putative OS=Leishmania_mexicana_MHOM/GT/2001/U1103 GN=LmxM.33.0610	LmxM.33.0610	1	2.55866e-42	153.52	3	RLSESGATK(1)AQLEEFR	1.4983	15753	10950	11864	24401	0	29735	58412	64151	57303	0	15115	10867	39508	36123	39960	0	24544	25420	0.610101	0.383527	0.440686	0.696518		0.741972	1.6363	1.87047	1.69646		0.545386	0.323502	1.23241	1.09634	1.30037		1.00971	1.03509
LmxM.33.0950	222	K	0.606976	0.0001223	Down	selenoprotein, putative OS=Leishmania_mexicana_MHOM/GT/2001/U1103 GN=LmxM.33.0950	LmxM.33.0950	1	2.08824e-20	148.9	2	AVSASAK(1)TFVLR	-0.49505	0	58781	62237	136220	137320	133800	0	85633	85477	96979	87770	94543	0	0	93827	0	0	0		0.590959	0.628727	0.990714	0.961968	0.940353		1.0763	1.05428	0.809267	0.739877	0.773455			1.04818
LmxM.34.0320	257	K	0.610358	3.90613e-07	Down	serine palmitoyltransferase, putative OS=Leishmania_mexicana_MHOM/GT/2001/U1103 GN=LmxM.34.0320	LmxM.34.0320	1	1.5203e-23	152.23	2	VK(1)VFQHNHFGQVEK	-2.9512	68471	0	70028	109110	101740	106480	108820	109900	117520	75464	79314	74409	130270	134360	137650	23288	0	28127	0.688609		0.70174	1.17551	1.10936	1.1624	1.09238	1.10031	1.19382	0.777599	0.844496	0.785975	1.38966	1.48119	1.44722	0.30407		0.383056
LmxM.34.1180	331	K	0.174357	2.7103e-05	Down	NADH-dependent fumarate reductase, putative OS=Leishmania_mexicana_MHOM/GT/2001/U1103 GN=LmxM.34.1180	LmxM.34.1180	1	3.11782e-21	127.62	3	CCSCIYADALATAALLK(1)NDPAAVR	-0.30803	0	26052	18914	140020	147050	122270	171590	166720	105440	0	0	0	48323	0	0	21820	22102	0		0.300551	0.219068	1.48994	1.56337	1.30812	1.76196	1.71998	1.09726				0.566813			0.22204	0.225924
LmxM.34.1180	1125	K	0.664981	5.18812e-06	Down	NADH-dependent fumarate reductase, putative OS=Leishmania_mexicana_MHOM/GT/2001/U1103 GN=LmxM.34.1180	LmxM.34.1180	1	9.61186e-34	133.76	2	GALK(1)GLGYNMNLVR	-1.0922	194330	181930	0	304680	312910	307570	306100	302680	324340	208450	229820	225230	285380	273210	288200	182380	196170	229840	0.781755	0.737895		1.13982	1.16957	1.15687	1.10504	1.09782	1.18663	0.918501	1.02431	1.01124	1.17685	1.12536	1.19153	0.652479	0.704979	0.812558
LmxM.34.1180	124	K	0.164797	8.89028e-07	Down	NADH-dependent fumarate reductase, putative OS=Leishmania_mexicana_MHOM/GT/2001/U1103 GN=LmxM.34.1180	LmxM.34.1180	1	4.61097e-28	180.81	2	HVMACCQK(1)VYHSSR	-2.9215	16442	17287	16593	115840	113690	116360	0	97360	0	31798	29599	29426	111900	118930	120830	78620	83759	78756	0.230208	0.244031	0.235162	1.5083	1.47899	1.52327		1.22903		0.487655	0.45915	0.459825	1.60607	1.70499	1.73869	0.978944	1.04763	0.969053
LmxM.36.1260	205	K	0.0679172	0.00390257	Down	fructose-1,6-bisphosphate aldolase OS=Leishmania_mexicana_MHOM/GT/2001/U1103 GN=LmxM.36.1260	LmxM.36.1260	1	1.5601e-50	110.95	3	YAILSQMSGLVPIVEPEVMIDGK(1)HDIDTCQR	0.48112	0	12742	13644	338740	346850	267950	75385	0	103390	0	0	0	0	0	0	0	54893	50741		0.101118	0.10434	2.23739	2.32357	1.70919	0.533919		0.758766								0.332517	0.304565
LmxM.36.1370	574	K	0.230661	0.00802624	Down	Valosin-containing protein, putative OS=Leishmania_mexicana_MHOM/GT/2001/U1103 GN=LmxM.36.1370	LmxM.36.1370	1	4.92811e-11	84.58	2	AAAPCVLFFDELDSVAK(1)SR	-0.12817	11633	11409	22673	0	34658	19193	82270	80611	63496	2735.6	23737	0	69780	50515	55087	19221	0	0	0.283353	0.282876	0.562034		1.16689	0.633623	2.28859	2.24023	1.82306	0.0680618	0.576329		1.74291	1.2814	1.39789	0.399968
LmxM.36.3970	437	K	0.436494	9.84197e-05	Down	hypothetical protein, conserved OS=Leishmania_mexicana_MHOM/GT/2001/U1103 GN=LmxM.36.3970	LmxM.36.3970	1	4.90108e-08	77.325	3	K(1)HSTALHGLQDQLASER	-0.28463	25482	28097	0	43086	44503	36123	48875	50675	54920	0	36596	37629	57718	0	66974	0	0	0	0.48669	0.484041		1.04327	1.11234	0.903486	1.2175	1.12262	1.27255		0.737456	0.831243	1.18515		1.49835
LmxM.36.4430	338	K	0.129737	1.31142e-07	Down	asparaginase-like protein OS=Leishmania_mexicana_MHOM/GT/2001/U1103 GN=LmxM.36.4430	LmxM.36.4430	1	5.58522e-11	94.507	2	LK(1)YLFGLGMSPEQVR	-1.3369	15825	0	14852	0	135410	125180	118060	114680	118160	16840	21993	27382	28609	24824	27525	52353	55965	52058	0.265299		0.25113		2.19514	1.99391	1.93634	1.86619	1.95984	0.314917	0.40641	0.498856	0.490747	0.421216	0.484294	0.869139	0.940669	0.847535
LmxM.01.0050	44	K	7.18905	4.37784e-06	Up	carboxylase, putative OS=Leishmania_mexicana_MHOM/GT/2001/U1103 GN=LmxM.01.0050	LmxM.01.0050	1	3.31677e-16	101.64	2	TVAVYSTADEQAK(1)HVK	-2.0932	100660	87373	89154	0	0	0	13235	13833	14734	34883	39838	41143	10250	0	9577.7	0	4745.7	5351.5	2.64573	2.25277	2.3344				0.319221	0.332069	0.354811	1.03349	1.19274	1.2265	0.280161		0.26207		0.123687	0.144405
LmxM.01.0410	35	K	6.72953	4.6315e-08	Up	hypothetical protein OS=Leishmania_mexicana_MHOM/GT/2001/U1103 GN=LmxM.01.0410	LmxM.01.0410	1	6.45307e-56	208.63	2	ALFELEASHK(1)TLR	0.18942	1467100	1320400	1358100	240400	242170	231210	170280	161510	167640	929860	906590	892200	235880	246190	257910	93896	91228	103160	2.74267	2.39532	2.4274	0.4199	0.420962	0.409866	0.340346	0.320524	0.33682	1.58301	1.63062	1.60711	0.46417	0.474031	0.493393	0.298498	0.272315	0.288247
LmxM.01.0410	87	K	5.87781	3.22226e-09	Up	hypothetical protein OS=Leishmania_mexicana_MHOM/GT/2001/U1103 GN=LmxM.01.0410	LmxM.01.0410	1	2.11321e-11	150.24	2	ALTSELEK(1)R	1.3491	928460	877650	892680	153030	145090	149590	145750	145790	154250	514160	511620	511860	105150	116520	115630	63630	72088	72708	2.78774	2.55714	2.5626	0.429302	0.405075	0.425905	0.467886	0.464691	0.497761	1.40586	1.47797	1.48084	0.332331	0.36034	0.355279	0.324887	0.345606	0.326296
LmxM.01.0410	177	K	6.58959	1.53373e-09	Up	hypothetical protein OS=Leishmania_mexicana_MHOM/GT/2001/U1103 GN=LmxM.01.0410	LmxM.01.0410	1	5.79548e-44	175.07	2	AVAYVYK(1)QLTHR	-0.96542	991330	914610	934340	149750	154680	157530	118610	124000	139390	471880	486780	505540	119130	106970	110550	70973	70309	84037	2.95839	2.64861	2.66587	0.417544	0.429221	0.445782	0.378444	0.392832	0.44707	1.2824	1.39765	1.45366	0.374223	0.328793	0.337604	0.360174	0.335026	0.374842
LmxM.01.0410	154	K	2.69382	0.000115843	Up	hypothetical protein OS=Leishmania_mexicana_MHOM/GT/2001/U1103 GN=LmxM.01.0410	LmxM.01.0410	1	0.00189002	98.009	2	LMK(1)VFLDTR	-0.2915	256250	261820	256640	0	0	0	83587	91986	0	190030	215350	201320	0	54326	60744	15430	0	0	1.58143	1.56795	1.51428				0.551527	0.602636		1.06798	1.27867	1.19713		0.345316	0.383619	0.161932
LmxM.01.0460	495	K	4.85434	1.89832e-05	Up	conserved protein OS=Leishmania_mexicana_MHOM/GT/2001/U1103 GN=LmxM.01.0460	LmxM.01.0460	1	3.25005e-08	122.51	2	IVSLAK(1)SAGMYR	-4.7702	533750	505500	517010	0	0	108120	105630	0	0	244700	291160	0	0	124120	0	0	0	0	1.82038	1.6784	1.7572			0.366386	0.355438			0.816543	0.993247			0.420891
LmxM.01.0520	405	K	9.14077	0.0265969	Up	long-chain-fatty-acid-CoA ligase, putative OS=Leishmania_mexicana_MHOM/GT/2001/U1103 GN=LmxM.01.0520	LmxM.01.0520	1	0.00107527	91.783	2	LPPVGTLK(1)R	-0.28898	773440	740930	740620	112990	0	0	65055	0	0	370960	351340	0	0	0	0	0	0	0	2.03867	1.95875	1.95312	0.194914			0.239079			0.776139	0.734732
LmxM.01.0470	684	K	5.58074	1.40769e-07	Up	fatty acyl CoA syntetase 1, putative OS=Leishmania_mexicana_MHOM/GT/2001/U1103 GN=LmxM.01.0470	LmxM.01.0470	1	1.3359e-08	97.594	2	SAIEK(1)HYADIIK	0.22851	284320	268100	276310	43046	47455	44073	53514	54573	56962	143150	145450	151290	58167	55439	55467	0	0	22470	2.52855	2.4515	2.42966	0.3823	0.432267	0.378015	0.481664	0.473101	0.508109	1.25177	1.24698	1.31459	0.550109	0.515572	0.527126			0.2262
LmxM.01.0520	534	K	2.618	9.03946e-10	Up	long-chain-fatty-acid-CoA ligase, putative OS=Leishmania_mexicana_MHOM/GT/2001/U1103 GN=LmxM.01.0520	LmxM.01.0520	1	0.00011249	88.921	2	GPFLFK(1)GYYK	-0.46405	313000	324110	323190	192180	197110	187500	86289	86415	83734	325720	330300	342720	104590	98534	95414	68659	74602	78735	2.02064	2.09855	2.08745	0.81196	0.830488	0.782043	0.776678	0.788198	0.752137	1.6691	1.69174	1.7904	0.761515	0.70594	0.679745	0.256093	0.278349	0.29427
LmxM.01.0520	673	K	2.32419	0.000195138	Up	long-chain-fatty-acid-CoA ligase, putative OS=Leishmania_mexicana_MHOM/GT/2001/U1103 GN=LmxM.01.0520	LmxM.01.0520	1	0.00408714	75.243	2	VSFECVK(1)R	0.91332	278570	231960	234240	144630	148620	0	83855	0	85634	0	212670	0	64571	0	0	0	0	0	2.00628	1.67553	1.68784	0.681706	0.698577		0.842029		0.85813		1.21519		0.524491
LmxM.01.0770	129	K	2.27074	0.00883274	Up	Eukaryotic initiation factor 4A-1 OS=Leishmania_mexicana_MHOM/GT/2001/U1103 GN=LmxM.01.0770	LmxM.01.0770	1	7.1564e-88	145.31	3	GGDIIAQAQSGTGK(1)TGAFSIGLLQR	1.0507	109780	110080	117330	65294	30206	0	0	36482	30080	0	0	0	0	0	5664.3	0	0	0	1.59259	1.59694	1.69171	1.13575	0.529474			0.65163	0.549316						0.0925038
LmxM.01.0770	332	K	5.15366	0.00149737	Up	Eukaryotic initiation factor 4A-1 OS=Leishmania_mexicana_MHOM/GT/2001/U1103 GN=LmxM.01.0770	LmxM.01.0770	1	0.000412505	140.05	2	RK(1)VDWIAEK	-0.87931	0	663840	724890	0	0	110210	0	0	109930	864550	858000	869880	0	99832	0	0	0	0		1.13053	1.22695			0.221771			0.235666	1.37332	1.35975	1.39806		0.190357
LmxM.01.0770	356	K	13.8309	0.000246095	Up	Eukaryotic initiation factor 4A-1 OS=Leishmania_mexicana_MHOM/GT/2001/U1103 GN=LmxM.01.0770	LmxM.01.0770	1	2.3935e-121	242.86	4	LNQSNHTVSSMHAEMPK(1)SDRER	1.2522	904110	763160	789190	0	57041	60057	30615	0	0	507430	524860	522450	69350	65846	0	25855	30289	31676	2.64481	2.23249	2.29451		0.201619	0.207588	0.10933			1.38457	1.4288	1.44233	0.226196	0.215667		0.0836014	0.101022	0.105939
LmxM.01.0770	216	K	8.44455	1.1322e-08	Up	Eukaryotic initiation factor 4A-1 OS=Leishmania_mexicana_MHOM/GT/2001/U1103 GN=LmxM.01.0770	LmxM.01.0770	1	0.00415467	108.92	2	VSDVIK(1)R	-1.5394	1798700	1474200	1415900	160190	170670	165800	135570	140990	139140	969470	953720	1014400	151260	144260	138220	84701	82961	91465	3.21117	2.63185	2.51231	0.3429	0.368157	0.349748	0.295461	0.30991	0.312695	1.61437	1.58446	1.70908	0.301088	0.288358	0.277785	0.167144	0.168863	0.186686
LmxM.02.0260	37	K	72.0218	2.52825e-11	Up	small GTP binding protein rab6-like protein OS=Leishmania_mexicana_MHOM/GT/2001/U1103 GN=LmxM.02.0260	LmxM.02.0260	1	1.17496e-138	278.73	2	LVLLGDQSVGK(1)TSIITR	-0.66131	1786500	1688200	1675100	31197	29201	27901	0	0	0	1015100	1430700	1265300	43960	24864	33831	36771	47911	44083	3.29955	3.28738	3.27867	0.0461118	0.0451883	0.0456807				1.4713	2.21589	1.93886	0.0853073	0.050464	0.0715625	0.0442345	0.059552	0.0531264
LmxM.02.0360	56	K	2.14732	0.00413724	Up	casein kinase II, alpha chain, putative OS=Leishmania_mexicana_MHOM/GT/2001/U1103 GN=LmxM.02.0360	LmxM.02.0360	1	1.43966e-05	67.881	2	GVGYWDYK(1)NAR	1.9748	0	139970	143400	0	0	78975	61593	0	66376	0	111260	120620	0	0	0	0	0	35165		1.57228	1.52438			0.817134	0.631609		0.714413		1.1778	1.29987						0.357077
LmxM.02.0370	479	K	3.15294	6.50774e-08	Up	proteasome regulatory non-ATPase subunit 6, putative OS=Leishmania_mexicana_MHOM/GT/2001/U1103 GN=LmxM.02.0370	LmxM.02.0370	1	3.66289e-30	159.93	2	FDTLVEENIAK(1)HK	-1.0521	109250	110630	112870	25389	26315	25699	35463	30362	35480	68826	66198	71693	37494	35173	41416	16436	16253	19339	2.00044	1.94035	2.03378	0.578427	0.612889	0.606678	0.677599	0.60066	0.713593	1.36263	1.28499	1.44826	0.748873	0.71388	0.856364	0.35316	0.359388	0.435821
LmxM.02.0450	18	K	3.40818	8.97513e-07	Up	voltage-dependent anion-selective channel, putative OS=Leishmania_mexicana_MHOM/GT/2001/U1103 GN=LmxM.02.0450	LmxM.02.0450	1	8.30129e-177	234.58	2	GSNDLLTK(1)NFSSCGAWK	-0.51705	383720	372180	366470	170440	159580	153270	105610	121050	0	322350	343780	327270	130380	139000	129230	68096	74319	70692	2.09953	2.05193	2.03911	0.682607	0.629113	0.615269	0.521446	0.578867		1.68123	1.69835	1.64549	0.656849	0.697126	0.633584	0.392823	0.424022	0.387931
LmxM.02.0450	159	K	4.73944	1.24587e-09	Up	voltage-dependent anion-selective channel, putative OS=Leishmania_mexicana_MHOM/GT/2001/U1103 GN=LmxM.02.0450	LmxM.02.0450	1	1.43249e-38	187.33	2	SK(1)TIDWTAGCR	0.70826	390020	393800	396530	110970	0	111160	93318	93751	100920	300220	303280	299580	101380	91735	97042	44770	48040	49121	2.42444	2.46662	2.50666	0.50492		0.506961	0.523465	0.50934	0.556789	1.77893	1.70219	1.71128	0.580263	0.522696	0.540528	0.293413	0.311394	0.306246
LmxM.02.0460	105	K	1.80471	5.26106e-06	Up	Mitochondrial outer membrane protein porin, putative OS=Leishmania_mexicana_MHOM/GT/2001/U1103 GN=LmxM.02.0460	LmxM.02.0460	1	7.01339e-86	212.69	3	ATAHYTIQGHK(1)VAVALQR	1.6321	183340	160380	154470	154940	153900	148300	136950	150590	140420	122690	115480	128540	98431	106620	105460	28678	23934	35731	1.83744	1.552	1.5064	0.93482	0.907244	0.86175	0.872527	0.961051	0.888248	1.23358	1.1366	1.29724	0.886489	0.985151	0.977266	0.357997	0.299263	0.466571
LmxM.02.0460	34	K	3.20352	0.00326192	Up	Mitochondrial outer membrane protein porin, putative OS=Leishmania_mexicana_MHOM/GT/2001/U1103 GN=LmxM.02.0460	LmxM.02.0460	1	9.92958e-06	83.775	2	LTK(1)DLLTK(1)DFPTPNK	0.08462	49587	73352	62090	30805	32449	0	0	0	0	42823	49615	44651	0	0	0	0	0	0	1.2316	1.75913	1.50059	0.460606	0.474058					1.06704	1.2102	1.11675
LmxM.02.0460	52	K	2.09764	4.24628e-09	Up	Mitochondrial outer membrane protein porin, putative OS=Leishmania_mexicana_MHOM/GT/2001/U1103 GN=LmxM.02.0460	LmxM.02.0460	1	3.73907e-34	150.44	2	GPK(1)DTFFINPK	0.17825	271560	287930	278940	224790	223110	230080	192600	205810	204900	276140	285510	298080	240450	233770	234530	119030	91912	106360	1.46007	1.49479	1.45934	0.727598	0.705594	0.717247	0.658299	0.704639	0.69534	1.4895	1.50755	1.61386	1.16176	1.15878	1.16593	0.797144	0.616539	0.745077
LmxM.02.0460	8	K	2.908	0.000136333	Up	Mitochondrial outer membrane protein porin, putative OS=Leishmania_mexicana_MHOM/GT/2001/U1103 GN=LmxM.02.0460	LmxM.02.0460	1	1.1698e-13	139.78	2	SQWQSSK(1)GSAAK	2.8004	118340	188430	206290	0	101910	92609	88377	91718	93352	129240	131490	140810	57032	60140	0	0	28844	26740	1.36551	2.09941	2.31621		0.691684	0.619582	0.648279	0.673923	0.679883	1.49611	1.49004	1.63614	0.591378	0.639783			0.41524	0.402013
LmxM.02.0670	72	K	1.7911	0.0113234	Up	mitochondrial carrier protein, putative OS=Leishmania_mexicana_MHOM/GT/2001/U1103 GN=LmxM.02.0670	LmxM.02.0670	1	1.45559e-80	202.24	2	GSVGETTANLNTIVFK(1)K	-0.1807	183060	180040	154770	0	75353	70411	116260	100860	113410	169520	180400	0	144180	139080	142790	0	58401	68206	1.3091	1.36486	1.19821		0.53984	0.494669	0.890226	0.799388	0.879039	1.35374	1.4103		1.1502	1.09137	1.14276		0.571544	0.654926
LmxM.02.0670	73	K	2.68009	1.22896e-06	Up	mitochondrial carrier protein, putative OS=Leishmania_mexicana_MHOM/GT/2001/U1103 GN=LmxM.02.0670	LmxM.02.0670	1	6.12065e-05	139.02	2	K(1)HADAGFLR	1.962	984040	891890	991800	338260	335540	338360	373360	377330	388230	583660	546530	605780	516830	498930	496760	0	219450	220730	1.73726	1.66919	1.89559	0.589345	0.593447	0.586849	0.705783	0.7383	0.742881	1.15066	1.05478	1.19886	1.01786	0.966544	0.981471		0.530198	0.523244
LmxM.02.0670	51	K	1.97799	1.70859e-05	Up	mitochondrial carrier protein, putative OS=Leishmania_mexicana_MHOM/GT/2001/U1103 GN=LmxM.02.0670	LmxM.02.0670	1	3.64442e-05	88.181	2	LMANK(1)GSIMR	0.77065	112930	102760	106120	53316	0	57000	52564	56032	0	82725	80507	80630	39050	39951	45006	0	0	0	1.4611	1.40941	1.4864	0.680761		0.724504	0.728199	0.803464		1.19521	1.13868	1.16941	0.563612	0.56719	0.651658
LmxM.02.0710	408	K	2.33042	0.0061664	Up	serine peptidase, putative OS=Leishmania_mexicana_MHOM/GT/2001/U1103 GN=LmxM.02.0710	LmxM.02.0710	1	7.60739e-05	129.28	2	EK(1)NLFHTIK	1.4826	73942	67345	66001	0	24216	21971	36469	0	37993	38559	39449	37137	30902	33215	35338	21653	21346	22381	1.88163	1.67819	1.66703		0.605698	0.539772	0.89207		0.952958	1.11314	1.14831	1.06407	0.880718	0.949329	1.01587	0.555357	0.556259	0.596659
LmxM.02.0710	553	K	3.80378	1.16627e-06	Up	serine peptidase, putative OS=Leishmania_mexicana_MHOM/GT/2001/U1103 GN=LmxM.02.0710	LmxM.02.0710	1	4.20785e-53	149.57	3	RPLGAFLFLGPTGVGK(1)TEVCK	-0.94066	126230	138700	161370	0	41205	35237	38582	39768	34992	61639	88080	79541	0	18189	29218	0	0	6916.2	1.89922	2.04354	2.40983		0.60936	0.511835	0.557995	0.585334	0.518931	1.05208	1.5159	1.34749		0.30737	0.496612			0.109015
LmxM.02.0710	140	K	4.77595	1.35911e-06	Up	serine peptidase, putative OS=Leishmania_mexicana_MHOM/GT/2001/U1103 GN=LmxM.02.0710	LmxM.02.0710	1	1.36269e-43	199.51	2	TK(1)NNPVLIGEPGVGK	-1.0154	489210	482290	523020	92057	83091	88785	116000	118970	135470	231900	268240	248680	106540	88001	107630	86351	80623	70673	2.49128	2.40508	2.6436	0.464572	0.415903	0.4365	0.567829	0.592682	0.679982	1.3397	1.56253	1.4259	0.607642	0.503332	0.619176	0.443207	0.42044	0.377038
LmxM.03.0030	138	K	4.2175	3.86586e-05	Up	D-3-phosphoglycerate dehydrogenase-like protein OS=Leishmania_mexicana_MHOM/GT/2001/U1103 GN=LmxM.03.0030	LmxM.03.0030	1	2.26237e-28	139.7	2	GAWNK(1)THVGCYEVR	-0.015257	347350	345260	358710	0	89799	83234	73211	0	0	307890	323450	329600	0	0	69538	0	0	0	1.64539	1.65654	1.77052		0.443998	0.408196	0.35052			0.989255	1.05132	1.06325			0.361538
LmxM.03.0030	49	K	9.15586	1.81524e-05	Up	D-3-phosphoglycerate dehydrogenase-like protein OS=Leishmania_mexicana_MHOM/GT/2001/U1103 GN=LmxM.03.0030	LmxM.03.0030	1	1.27215e-08	144.47	2	IK(1)DVHFLGIR	-0.1395	208540	178140	179690	0	22994	20157	0	0	17454	160320	164600	155740	0	0	18427	18947	18499	22621	2.52054	2.18082	2.26299		0.290086	0.252229			0.218328	1.31432	1.36508	1.28189			0.244449	0.168272	0.170182	0.213928
LmxM.03.0030	59	K	9.63867	2.95474e-10	Up	D-3-phosphoglycerate dehydrogenase-like protein OS=Leishmania_mexicana_MHOM/GT/2001/U1103 GN=LmxM.03.0030	LmxM.03.0030	1	6.25599e-70	196.42	2	SK(1)TQVTQVILDAAPK	-0.49768	474080	455570	478210	44144	41996	44130	53403	52159	51696	480510	499690	497690	72207	72335	79418	74973	84564	87866	2.58203	2.51316	2.71384	0.256074	0.238741	0.248834	0.293975	0.291338	0.291392	1.7751	1.8674	1.84593	0.425614	0.42749	0.474743	0.300043	0.350556	0.37444
LmxM.03.0190	67	K	10.5777	1.15448e-05	Up	U2 splicing auxiliary factor, putative OS=Leishmania_mexicana_MHOM/GT/2001/U1103 GN=LmxM.03.0190	LmxM.03.0190	1	0.0013988	86.205	2	K(1)HFEHFYK	-0.39573	325000	273150	285410	38575	35193	37954	0	19255	24303	214800	226610	218630	36650	36206	36718	21213	24132	24162	3.30663	2.88322	3.00342	0.356704	0.327345	0.352463		0.182846	0.229168	1.80033	1.81766	1.93679	0.357248	0.354816	0.358807	0.159228	0.184442	0.183678
LmxM.03.0200	94	K	6.09145	4.58115e-08	Up	delta-1-pyrroline-5-carboxylate dehydrogenase, putative OS=Leishmania_mexicana_MHOM/GT/2001/U1103 GN=LmxM.03.0200	LmxM.03.0200	1	1.49844e-22	128.41	2	AAIFYK(1)AAHLLSTK	0.40791	250970	322590	327600	51943	42705	46025	57064	54829	60970	308920	383270	358360	62818	59712	64369	94074	79453	83193	1.92787	2.49755	2.54347	0.430138	0.35238	0.370737	0.378573	0.359536	0.396725	1.74625	2.17388	2.0144	0.509	0.477473	0.517399	0.474487	0.403009	0.419521
LmxM.03.0200	386	K	1.89856	4.01916e-06	Up	delta-1-pyrroline-5-carboxylate dehydrogenase, putative OS=Leishmania_mexicana_MHOM/GT/2001/U1103 GN=LmxM.03.0200	LmxM.03.0200	1	1.94415e-32	153.52	2	ADPSTYEIVVGGK(1)CDK	-1.1569	167560	175360	170400	90102	77264	0	108880	109020	101780	207230	204670	208760	91836	92929	92407	89373	90840	99772	1.51181	1.59464	1.5539	0.876364	0.748824		0.848408	0.839669	0.777867	1.37588	1.36349	1.37829	0.87401	0.872786	0.872415	0.529457	0.541192	0.590942
LmxM.03.0200	67	K	2.43936	0.0136971	Up	delta-1-pyrroline-5-carboxylate dehydrogenase, putative OS=Leishmania_mexicana_MHOM/GT/2001/U1103 GN=LmxM.03.0200	LmxM.03.0200	1	0.000603878	67.881	2	AYNATPELAK(1)K	-0.7833	0	145890	158310	0	57581	0	0	0	75577	140470	153270	145540	74126	70360	0	0	84942	83521		1.57181	1.71042		0.661186				0.684344	1.10498	1.20976	1.13846	0.835826	0.782932			0.599568	0.586103
LmxM.03.0200	296	K	5.19591	1.67677e-06	Up	delta-1-pyrroline-5-carboxylate dehydrogenase, putative OS=Leishmania_mexicana_MHOM/GT/2001/U1103 GN=LmxM.03.0200	LmxM.03.0200	1	5.10897e-29	128.28	3	DFHLVHPSADMK(1)HVAAGTIR	0.5612	544100	468170	458390	99754	93810	98840	92380	0	97703	369780	365760	372270	101500	97385	102410	89363	80632	100630	2.94339	2.55259	2.50629	0.581734	0.545124	0.560684	0.431597		0.447708	1.47203	1.46096	1.47366	0.579179	0.548393	0.579701	0.317414	0.288022	0.357361
LmxM.03.0230	81	K	3.89856	6.42e-09	Up	long chain fatty Acyl CoA synthetase, putative OS=Leishmania_mexicana_MHOM/GT/2001/U1103 GN=LmxM.03.0230	LmxM.03.0230	1	5.46802e-19	166.66	2	FWK(1)SIVNFGR	-1.8046	472050	506290	515690	173980	199840	185120	156230	158170	154610	475240	486240	477190	162900	152180	166100	65530	67572	70148	2.15941	2.2796	2.34486	0.563796	0.64539	0.608433	0.555603	0.55407	0.552901	1.56053	1.63781	1.60573	0.750521	0.701213	0.762909	0.290757	0.305481	0.320736
LmxM.03.0520	371	K	5.17026	5.22667e-07	Up	hypothetical protein, conserved OS=Leishmania_mexicana_MHOM/GT/2001/U1103 GN=LmxM.03.0520	LmxM.03.0520	1	5.70358e-05	101.82	2	AK(1)SFSFIELR	-0.065712	247910	235230	239300	21593	20608	25592	48785	50296	48164	219590	243670	236650	0	47161	0	100360	114700	115060	2.09013	2.10594	2.28053	0.38325	0.312095	0.458479	0.448841	0.428187	0.474476	1.47632	1.70001	1.67377		0.512867		0.462003	0.433193	0.496516
LmxM.03.0540	78	K	8.88469	1.84138e-08	Up	serine peptidase, Clan SJ, family S16, putative OS=Leishmania_mexicana_MHOM/GT/2001/U1103 GN=LmxM.03.0540	LmxM.03.0540	1	8.5608e-09	146.88	2	FIVK(1)SISGAR	-0.035383	1270100	1204000	1234300	0	119900	119680	138830	0	158040	827440	821250	838440	165360	154730	159190	109030	114830	127760	2.81924	2.67272	2.68657		0.306736	0.301808	0.289762		0.329055	1.63208	1.5426	1.65967	0.357119	0.35246	0.358229	0.195627	0.213797	0.239935
LmxM.03.0540	187	K	17.1902	1.9499e-05	Up	serine peptidase, Clan SJ, family S16, putative OS=Leishmania_mexicana_MHOM/GT/2001/U1103 GN=LmxM.03.0540	LmxM.03.0540	1	1.73273e-16	132.9	2	GVLLYGPPGTGK(1)TLLAK	-0.083049	1353200	1301600	1293500	90188	74501	61683	0	0	51916	1034300	1081400	1032000	151730	138230	161450	0	43145	0	2.52604	2.42991	2.36771	0.186046	0.160285	0.130816			0.0909048	1.71568	1.70824	1.71797	0.275574	0.264802	0.305539		0.0675555
LmxM.03.0640	272	K	2.07276	0.00307817	Up	hypothetical protein, conserved OS=Leishmania_mexicana_MHOM/GT/2001/U1103 GN=LmxM.03.0640	LmxM.03.0640	1	9.25064e-09	96.313	3	LATAAYGK(1)HGSTHPELR	0.60856	94057	82493	83684	0	0	0	0	42100	49643	0	83499	86459	0	51505	0	44831	0	53455	1.64079	1.45028	1.44747					0.668017	0.791722		1.01252	1.03603		0.887439		0.518816		0.623828
LmxM.03.0770	393	K	3.26597	0.0014136	Up	Ubiquitin-like domain containing protein, putative OS=Leishmania_mexicana_MHOM/GT/2001/U1103 GN=LmxM.03.0770	LmxM.03.0770	1	1.09794e-11	124.24	2	GGANK(1)VSDSATAAPLPR	-3.2021	115740	79543	90806	0	0	36013	25141	0	24942	96983	98142	105430	28643	22563	24342	0	0	16884	2.07768	1.50581	1.70963			0.675154	0.471103		0.474434	1.0688	1.09118	1.15896	0.530456	0.424705	0.445293			0.342669
LmxM.04.0010	205	K	6.7526	0.000338041	Up	organelle-type calcium ATPase OS=Leishmania_mexicana_MHOM/GT/2001/U1103 GN=LmxM.04.0010	LmxM.04.0010	1	0.000390778	79.059	2	GTAVVYGK(1)AR	0.60833	213320	160220	168560	30925	0	0	0	0	28604	60359	66505	77848	0	0	0	0	0	0	2.0063	1.54127	1.65929	0.261547					0.252513	0.583906	0.670757	0.779337
LmxM.04.0450	414	K	1.60802	0.0279058	Up	calpain-like cysteine peptidase, putative OS=Leishmania_mexicana_MHOM/GT/2001/U1103 GN=LmxM.04.0450	LmxM.04.0450	1	7.518e-13	81.578	3	IDEMVTK(1)ATVHSGHDLESR	1.1699	0	48152	45478	0	0	0	22272	29296	22092	24983	24976	25280	20142	19357	18367	22205	23771	24575		1.75288	1.71351				0.970505	1.28745	0.975565	1.05953	1.09714	1.10669	0.714967	0.682996	0.659768	0.492429	0.541557	0.550401
LmxM.04.0450	134	K	2.89696	1.48571e-05	Up	calpain-like cysteine peptidase, putative OS=Leishmania_mexicana_MHOM/GT/2001/U1103 GN=LmxM.04.0450	LmxM.04.0450	1	7.07293e-23	135.13	3	SFEVHVVCTFGK(1)HSK	1.1378	185320	186340	180580	31503	29415	34044	0	0	0	97375	99939	106400	82284	84387	84675	49704	50656	53433	2.00968	1.98811	1.99412	0.684882	0.641279	0.742181				1.21036	1.28668	1.36517	0.856043	0.872675	0.891467	0.323058	0.33824	0.350746
LmxM.04.0470	6	K	3.22304	0.0101357	Up	60S ribosomal protein L11 (L5, L16) OS=Leishmania_mexicana_MHOM/GT/2001/U1103 GN=LmxM.04.0470	LmxM.04.0470	1	4.19465e-09	141.29	2	VAESK(1)AANPMR	-0.069482	251580	237900	209700	91326	50847	38758	0	102520	0	201730	181010	222260	92963	0	88872	0	50047	28539	2.17873	1.58158	1.37953	0.700537	0.337891	0.289194		0.798665		1.41123	1.13163	1.4441	0.752114		0.595549		0.480823	0.300467
LmxM.04.0470	177	K	4.6171	6.58162e-05	Up	60S ribosomal protein L11 (L5, L16) OS=Leishmania_mexicana_MHOM/GT/2001/U1103 GN=LmxM.04.0470	LmxM.04.0470	1	4.94118e-16	147.78	2	VHDGIIFQAK(1)K	-1.1604	799470	788840	784310	184100	180900	186990	0	0	132980	584180	586520	561610	171750	163020	162130	0	0	0	2.24733	1.70225	1.67477	0.458381	0.390199	0.45288			0.322747	1.32651	1.1902	1.18442	0.451031	0.356347	0.352657
LmxM.04.0630	40	K	11.0357	7.60418e-08	Up	hypothetical protein, conserved OS=Leishmania_mexicana_MHOM/GT/2001/U1103 GN=LmxM.04.0630	LmxM.04.0630	1	1.27132e-12	130.31	3	EVGK(1)VHYPLRR	0.034637	708690	583790	597230	87579	87274	93468	97509	95161	103580	286870	291740	298460	109200	110720	104220	74620	63947	80484	4.59994	4.57242	2.90623	0.378321	0.384146	0.374788	0.353095	0.337086	0.361577	2.09137	2.00392	1.91825	0.471499	0.506688	0.451443	0.293285	0.294821	0.330329
LmxM.04.0630	67	K	8.39224	4.69025e-07	Up	hypothetical protein, conserved OS=Leishmania_mexicana_MHOM/GT/2001/U1103 GN=LmxM.04.0630	LmxM.04.0630	1	3.27868e-10	148.98	2	FNEIVK(1)R	-0.097599	1096700	926900	945550	162870	160220	157170	234510	229910	235040	490470	511510	504010	199810	191330	186930	143680	140480	151740	4.13575	4.21787	2.67327	0.408763	0.409731	0.366153	0.493377	0.473162	0.476691	2.07744	2.04131	1.88204	0.50124	0.508707	0.470437	0.328096	0.37629	0.361833
LmxM.04.0630	123	K	12.1093	1.95865e-07	Up	hypothetical protein, conserved OS=Leishmania_mexicana_MHOM/GT/2001/U1103 GN=LmxM.04.0630	LmxM.04.0630	1	1.09824e-07	118.91	2	K(1)HMQELWTR	0.72921	457010	417640	412890	61665	55480	61648	56384	57809	55948	207530	205870	202810	52110	51010	46372	0	29510	33998	4.40231	4.85457	2.98182	0.395329	0.362416	0.366861	0.303013	0.303904	0.289847	2.24536	2.09863	1.93449	0.333917	0.346441	0.298103		0.201914	0.207086
LmxM.04.0750	82	K	4.97245	0.000133002	Up	60S ribosomal protein L10, putative OS=Leishmania_mexicana_MHOM/GT/2001/U1103 GN=LmxM.04.0750	LmxM.04.0750	1	1.46387e-07	150.17	3	RANK(1)DVFHMR	1.0005	976070	661440	844480	316610	326080	324950	123970	122870	124470	593350	617490	651260	157340	148720	154000	47237	46211	55548	3.08779	1.98387	2.6127	0.693499	0.722166	0.699936	0.320772	0.320258	0.334143	1.70473	1.83761	1.95508	0.469432	0.453707	0.479863	0.17883	0.170018	0.207764
LmxM.04.0750	13	K	3.93883	0.000479667	Up	60S ribosomal protein L10, putative OS=Leishmania_mexicana_MHOM/GT/2001/U1103 GN=LmxM.04.0750	LmxM.04.0750	0.999971	5.03677e-10	142.36	2	FCK(1)NKPYPK	0.0029955	598410	701950	736900	357190	337600	335180	118780	128350	109510	620970	623000	646720	187240	177840	168660	0	0	0	1.69727	1.88761	2.04406	0.701463	0.670347	0.647299	0.275554	0.29994	0.263576	1.59956	1.66225	1.74065	0.50086	0.48643	0.471187
LmxM.04.0750	141	K	6.41302	1.9596e-06	Up	60S ribosomal protein L10, putative OS=Leishmania_mexicana_MHOM/GT/2001/U1103 GN=LmxM.04.0750	LmxM.04.0750	1	7.06497e-08	104.49	2	TK(1)EAYVPQAFEALR	-1.549	395650	395470	400520	73305	74795	66797	84179	84353	89005	380410	394790	339480	91259	0	95727	54806	61817	63680	2.36421	2.24049	2.34062	0.303293	0.31289	0.271773	0.411424	0.4153	0.451324	2.06444	2.2192	1.92501	0.514299		0.563428	0.391916	0.429601	0.449896
LmxM.04.0800	294	K	20.0266	1.02858e-05	Up	hypothetical protein OS=Leishmania_mexicana_MHOM/GT/2001/U1103 GN=LmxM.04.0800	LmxM.04.0800	1	1.21227e-15	127.03	2	FGK(1)HTHFTEFK	3.7401	340240	228460	238680	16310	18435	16220	0	11494	0	106310	118220	120560	0	18954	0	0	0	0	3.21671	2.15216	2.41218	0.143884	0.15197	0.130939		0.0912547		1.05579	1.18354	1.21744		0.152138
LmxM.04.1050	253	K	7.62348	5.04199e-05	Up	acyltransferase-like protein, copy 2 OS=Leishmania_mexicana_MHOM/GT/2001/U1103 GN=LmxM.04.1050	LmxM.04.1050	1	9.65296e-28	177.47	2	SVAVGLQK(1)HMQQVR	-2.6458	198690	117580	122760	36031	36643	38557	15056	18940	14759	77692	82035	79686	21619	16925	19168	9564.5	0	17594	4.37819	2.63079	2.78301	0.532277	0.54357	0.586829	0.278427	0.354478	0.273321	1.57492	1.61416	1.60395	0.512656	0.396078	0.454042	0.141051		0.260289
LmxM.04.1160	112	K	3.6303	8.81286e-05	Up	fructose-1,6-bisphosphatase, cytosolic, putative OS=Leishmania_mexicana_MHOM/GT/2001/U1103 GN=LmxM.04.1160	LmxM.04.1160	1	8.81413e-34	170.22	2	LPK(1)NTTISSVEDANAVIR	-1.5021	371280	247270	219800	69828	103260	83539	88201	126930	79035	169280	241430	218460	65890	57347	61991	23079	22997	22845	3.07055	2.04251	1.88866	0.486215	0.730533	0.569351	0.626053	0.878479	0.566747	1.38617	1.93509	1.80872	0.566147	0.501034	0.560513	0.185401	0.195999	0.214164
LmxM.04.1160	209	K	3.4746	0.000367992	Up	fructose-1,6-bisphosphatase, cytosolic, putative OS=Leishmania_mexicana_MHOM/GT/2001/U1103 GN=LmxM.04.1160	LmxM.04.1160	1	6.84745e-13	155.57	2	MNK(1)TTQYTAR	-0.74115	0	370080	372220	0	154630	0	108260	122610	124060	289390	0	295380	109870	102130	101960	0	63253	65685		2.20096	2.30275		0.787634		0.553259	0.610964	0.640507	1.70615		1.76077	0.67969	0.64244	0.663757		0.388138	0.443348
LmxM.04.1170	201	K	11.0996	1.47212e-05	Up	Double RNA binding domain protein 3 OS=Leishmania_mexicana_MHOM/GT/2001/U1103 GN=LmxM.04.1170	LmxM.04.1170	1	3.45256e-54	149.58	2	IVVLPK(1)NESSQWNHNR	-2.5502	2025500	1969300	1952400	126630	146090	167330	0	0	0	1148500	1151500	1220000	163560	116530	141270	83587	83074	0	2.48791	2.50668	2.59809	0.193393	0.222299	0.268361				1.26836	1.38708	1.47189	0.216304	0.157025	0.197096	0.101671	0.106279
LmxM.04.1190	102	K	6.67656	0.00211735	Up	tRNA nucleotidyltransferase, putative OS=Leishmania_mexicana_MHOM/GT/2001/U1103 GN=LmxM.04.1190	LmxM.04.1190	1	2.84938e-07	97.084	2	ANPALSK(1)HIETATVR	-1.8514	94350	63810	66211	11158	0	0	0	0	12217	38619	38105	37394	12249	14042	11241	0	0	0	2.88674	1.83685	2.11481	0.306956					0.375871	0.991076	0.989014	0.973726	0.316635	0.376927	0.293725
LmxM.04.1230	51	K	3.10976	0.000541607	Up	actin OS=Leishmania_mexicana_MHOM/GT/2001/U1103 GN=LmxM.04.1230	LmxM.04.1230	1	3.61043e-93	218.39	2	NMQAMMGSANK(1)TVYVGDEAQSK	-0.39211	106160	111050	93334	0	21808	15431	40573	34148	34949	83791	92784	78151	23640	12626	0	1051	0	0	1.98645	2.11507	1.7496		0.560133	0.389667	0.818323	0.683255	0.684507	1.56964	1.73568	1.4717	0.422676	0.228887		0.0151148
LmxM.04.1230	62	K	3.21306	3.12693e-06	Up	actin OS=Leishmania_mexicana_MHOM/GT/2001/U1103 GN=LmxM.04.1230	LmxM.04.1230	1	1.49537e-20	172.1	2	TVYVGDEAQSK(1)R	-0.58331	587160	450780	510430	125830	129220	116320	148090	0	137620	370800	384100	381460	158160	0	162590	128460	0	143900	2.24218	1.75213	1.95268	0.648393	0.677332	0.599447	0.609551		0.550074	1.41755	1.46635	1.46599	0.577103		0.598636	0.377019		0.418632
LmxM.04.1230	40	K	5.62584	9.02013e-08	Up	actin OS=Leishmania_mexicana_MHOM/GT/2001/U1103 GN=LmxM.04.1230	LmxM.04.1230	1	1.70268e-69	253.1	2	PK(1)NMQAMMGSANK	1.2976	1259000	1016000	1038200	160000	156940	162020	160630	170100	171930	588470	615580	618050	165200	164000	167450	81595	91263	94918	3.29901	2.70982	2.72533	0.565741	0.564481	0.57294	0.453685	0.476609	0.471558	1.54371	1.61258	1.62985	0.413628	0.416331	0.423056	0.164325	0.184033	0.18948
LmxM.05.0030	67	K	3.84127	3.61379e-05	Up	small GTP-binding protein, putative OS=Leishmania_mexicana_MHOM/GT/2001/U1103 GN=LmxM.05.0030	LmxM.05.0030	1	2.54807e-56	193.94	2	LK(1)TIDMGGHQQAR	0.34394	333770	209460	220750	74530	70886	67551	50052	51382	58558	169270	181590	176420	72056	66396	64294	50793	50715	58559	3.60152	2.02083	2.08057	0.784778	0.718328	0.676897	0.559919	0.605904	0.664785	1.45407	1.48313	1.48565	0.615756	0.5367	0.541796	0.322298	0.34579	0.396682
LmxM.05.0100	58	K	4.0783	0.00259657	Up	phosphoprotein phosphatase, putative OS=Leishmania_mexicana_MHOM/GT/2001/U1103 GN=LmxM.05.0100	LmxM.05.0100	1	1.50672e-08	81.799	2	AK(1)LFPMVSGFFVR	0.91696	283150	319290	348300	0	0	73575	52093	39645	0	220900	243830	257980	99283	86986	85020	63010	67367	73572	1.70108	1.9505	2.14736			0.663742	0.429708	0.328451		1.21399	1.36234	1.51096	0.565141	0.510071	0.493343	0.347729	0.372717	0.413423
LmxM.05.0140	351	K	2.4196	0.000176634	Up	nucleolar RNA helicase II, putative OS=Leishmania_mexicana_MHOM/GT/2001/U1103 GN=LmxM.05.0140	LmxM.05.0140	1	0.00129395	98.009	2	TLVFTNTK(1)K	2.0331	156430	155890	151170	57546	0	54587	0	0	41036	127060	127250	0	66240	61439	59477	28240	0	27681	1.69275	1.65229	1.61249	0.745242		0.703083			0.600578	1.31963	1.32204		0.698959	0.64423	0.62598	0.33979		0.321273
LmxM.05.0190	214	K	25.4976	1.52779e-07	Up	Fip1 motif/Zinc finger C-x8-C-x5-C-x3-H type (and similar), putative OS=Leishmania_mexicana_MHOM/GT/2001/U1103 GN=LmxM.05.0190	LmxM.05.0190	1	8.97604e-56	207.67	2	LCK(1)SFAEGHCNR	-0.22113	489920	375540	402390	20087	18515	20150	9893.7	15648	15115	261940	283090	274040	21639	23013	19371	19280	19239	19902	3.85035	3.03908	3.46266	0.153899	0.152482	0.164707	0.0822737	0.130165	0.128478	1.76895	2.07649	2.07134	0.143083	0.163268	0.141424	0.153105	0.159297	0.170412
LmxM.05.0350	257	K	2.49873	1.02127e-05	Up	trypanothione reductase OS=Leishmania_mexicana_MHOM/GT/2001/U1103 GN=LmxM.05.0350	LmxM.05.0350	1	0.00905299	60.892	2	LSPTK(1)ITK	1.178	0	221730	222470	0	66569	64103	68762	0	69770	157390	0	154790	104040	104390	0	0	0	86830		1.91673	1.97957		0.799751	0.809306	0.736545		0.773022	1.31791		1.35522	0.748759	0.765519				0.480232
LmxM.05.0350	101	K	2.35041	1.09598e-05	Up	trypanothione reductase OS=Leishmania_mexicana_MHOM/GT/2001/U1103 GN=LmxM.05.0350	LmxM.05.0350	1	7.58994e-44	180.81	2	TLIAAK(1)NK(1)VVSGINESYK	-2.3069	419250	297130	307640	107640	105570	106050	114860	116080	113240	202410	238850	246020	166190	158790	171970	169610	173320	184100	2.35732	1.63343	1.74084	0.814198	0.806565	0.851453	0.782412	0.824578	0.797882	1.07784	1.31811	1.36978	0.760611	0.740519	0.788651	0.58705	0.636559	0.647517
LmxM.05.0380	99	K	2.91951	5.43537e-07	Up	KH-associated protein 2 OS=Leishmania_mexicana_MHOM/GT/2001/U1103 GN=LmxM.05.0380	LmxM.05.0380	1	8.87354e-55	153.05	2	VPVDPAMYNTTTK(1)DAYK(1)K	-0.8954	1694200	1915300	1887700	225980	245250	212970	461410	470170	466500	1371400	1434900	1412000	500440	459920	454070	439940	451680	456870	1.74107	1.94327	1.99978	0.706293	0.748722	0.62127	0.605864	0.605902	0.605837	1.69999	1.83859	1.86482	0.623144	0.58391	0.577517	0.345479	0.3889	0.379452
LmxM.05.0500	564	K	4.2666	4.7495e-08	Up	ATP synthase F1, alpha subunit, putative OS=Leishmania_mexicana_MHOM/GT/2001/U1103 GN=LmxM.05.0500	LmxM.05.0500	1	1.02861e-35	178.94	2	ALK(1)NLLYSCK	0.2222	4849800	4182900	4318400	989140	1000700	1000100	923050	900700	943260	2683100	2798400	2658400	1436600	1294300	1471700	853530	790510	882300	2.34881	2.03997	2.12332	0.54697	0.557289	0.542184	0.468456	0.460014	0.477683	1.55539	1.66411	1.58605	0.754379	0.686803	0.800104	0.443258	0.416484	0.45445
LmxM.05.0500	571	K	2.83247	6.13392e-08	Up	ATP synthase F1, alpha subunit, putative OS=Leishmania_mexicana_MHOM/GT/2001/U1103 GN=LmxM.05.0500	LmxM.05.0500	1	2.92885e-08	121.31	2	NLLYSCK(1)R	0.18802	1188500	1199900	1192100	0	391980	400880	392240	384650	388570	715490	719230	709340	445940	429210	429520	237150	242250	250380	1.9008	1.93243	1.93561		0.720864	0.71768	0.657367	0.648738	0.649816	1.36968	1.41238	1.39754	0.773291	0.752108	0.771123	0.4067	0.421471	0.425875
LmxM.05.0500	300	K	2.47598	0.0010569	Up	ATP synthase F1, alpha subunit, putative OS=Leishmania_mexicana_MHOM/GT/2001/U1103 GN=LmxM.05.0500	LmxM.05.0500	1	1.1959e-11	68.108	2	HCLCVYDDLSK(1)QAVAYR	0.99496	160690	141700	131290	0	0	0	56865	0	55455	58697	69296	64560	0	32559	33865	22907	24418	0	2.06829	1.8366	1.71562				0.766985		0.746359	0.90431	1.09516	1.02367		0.459163	0.489302	0.316159	0.341901
LmxM.05.0500	555	K	1.97067	3.6595e-05	Up	ATP synthase F1, alpha subunit, putative OS=Leishmania_mexicana_MHOM/GT/2001/U1103 GN=LmxM.05.0500	LmxM.05.0500	1	0.00117796	133.68	2	MNAIK(1)TEK	0.2283	329910	341560	352920	130910	135590	133910	191240	199730	173300	256000	254170	259240	207040	191120	186610	105840	73421	93962	1.50113	1.56499	1.6303	0.680106	0.709418	0.682048	0.911843	0.958368	0.824527	1.39425	1.42002	1.4531	1.02142	0.9528	0.953148	0.5164	0.363421	0.454695
LmxM.05.0500	202	K	4.31957	6.20213e-06	Up	ATP synthase F1, alpha subunit, putative OS=Leishmania_mexicana_MHOM/GT/2001/U1103 GN=LmxM.05.0500	LmxM.05.0500	1	2.74792e-199	313.9	2	QTGK(1)TSIAVSTIINQVR	-0.42465	2063100	1990300	1902700	435810	401830	383370	0	0	0	1072300	1335500	1232700	517690	387290	408440	215150	252080	249240	2.20206	2.13918	2.0618	0.531113	0.493177	0.458042				1.36994	1.75025	1.62083	0.599111	0.452916	0.489372	0.246242	0.292693	0.282925
LmxM.05.0500	31	K	3.68474	3.54039e-11	Up	ATP synthase F1, alpha subunit, putative OS=Leishmania_mexicana_MHOM/GT/2001/U1103 GN=LmxM.05.0500	LmxM.05.0500	1	5.20345e-05	118.91	2	SAAPGQK(1)SFFK	1.2267	2918200	3045700	3018100	694520	699060	722050	787940	785360	815570	2005900	2053000	2035100	893900	869690	870060	522370	541240	505530	2.01907	2.122	2.12001	0.548659	0.556163	0.559219	0.571279	0.573022	0.590039	1.66121	1.7441	1.73458	0.670586	0.659285	0.675753	0.38755	0.407373	0.371987
LmxM.05.0500	113	K	1.79853	0.0024923	Up	ATP synthase F1, alpha subunit, putative OS=Leishmania_mexicana_MHOM/GT/2001/U1103 GN=LmxM.05.0500	LmxM.05.0500	1	7.94166e-29	130.78	2	VMATGK(1)LLYIPVGAGVLGK	1.0567	314150	282520	315150	101610	136910	106430	187030	196810	215540	163960	100740	76939	122950	117600	77556	101860	115670	120750	1.81119	1.6402	1.84464	0.668875	0.907642	0.686863	1.12995	1.19658	1.29939	1.13147	0.713143	0.546444	0.768573	0.742861	0.501933	0.629716	0.725462	0.740389
LmxM.05.0650	767	K	4.91462	2.73792e-05	Up	hypothetical protein, conserved OS=Leishmania_mexicana_MHOM/GT/2001/U1103 GN=LmxM.05.0650	LmxM.05.0650	1	3.91298e-11	146.48	2	SVGK(1)SAVGGCGASPSR	-0.18977	59452	65403	68243	10720	0	11157	0	0	10821	37301	34136	42446	14480	11121	15761	0	0	0	1.80089	1.89913	1.90599	0.407566		0.405364			0.32775	1.40849	1.19041	1.52606	0.373994	0.303218	0.425971
LmxM.05.0780	138	K	4.97153	3.08457e-06	Up	hypothetical protein, conserved OS=Leishmania_mexicana_MHOM/GT/2001/U1103 GN=LmxM.05.0780	LmxM.05.0780	1	0.00116196	69.905	2	NGWEWK(1)NR	1.1229	63823	63509	67811	0	0	17805	0	21650	20216	42972	43956	45420	12901	10165	0	0	0	0	2.40315	2.22015	2.32048			0.441707		0.498861	0.456142	1.35711	1.50058	1.53187	0.336396	0.251077
LmxM.05.0830	145	K	8.01826	3.49712e-07	Up	methylthioadenosine phosphorylase, putative OS=Leishmania_mexicana_MHOM/GT/2001/U1103 GN=LmxM.05.0830	LmxM.05.0830	1	1.62966e-26	160.98	2	IFNK(1)IAYEALLR	-3.5687	1184000	1852500	1419300	147260	148840	121330	99267	121180	126530	877750	915790	1233900	202630	210330	193340	116760	105500	107310	2.17831	3.42228	2.63747	0.380411	0.388193	0.322003	0.277503	0.339462	0.347251	1.467	1.537	2.08106	0.334308	0.351493	0.328124	0.203538	0.179179	0.181608
LmxM.05.0830	184	K	5.50617	2.16201e-08	Up	methylthioadenosine phosphorylase, putative OS=Leishmania_mexicana_MHOM/GT/2001/U1103 GN=LmxM.05.0830	LmxM.05.0830	1	3.11962e-198	220.14	3	IHSSGTLVTMEGPQFSTK(1)AESLLNK	1.4835	336490	290510	286850	42196	39034	37021	37698	39891	31784	142480	215880	185390	97641	73270	83234	32376	46278	52293	2.74608	2.38062	2.36451	0.483518	0.451589	0.435826	0.467471	0.495687	0.386929	1.0563	1.60718	1.38696	0.714574	0.543142	0.626599	0.25035	0.348643	0.392564
LmxM.05.0960	539	K	11.8335	5.64801e-08	Up	metallo-peptidase, Clan M-, Family M49 OS=Leishmania_mexicana_MHOM/GT/2001/U1103 GN=LmxM.05.0960	LmxM.05.0960	1	4.73219e-68	156.73	2	AGLVGLEFYTPEK(1)HQWR	-0.60821	495350	466510	428300	33163	35885	0	23075	20488	21626	167910	222300	191130	40815	31299	33891	20929	24405	24069	3.40599	3.19965	2.96722	0.290055	0.315772		0.258298	0.238419	0.245732	1.1689	1.54669	1.36749	0.31116	0.23821	0.260265	0.11159	0.133903	0.130315
LmxM.05.0960	385	K	1.69457	0.0280329	Up	metallo-peptidase, Clan M-, Family M49 OS=Leishmania_mexicana_MHOM/GT/2001/U1103 GN=LmxM.05.0960	LmxM.05.0960	1	9.14391e-61	179.85	2	QTVGFK(1)NVYLSNVVSAMTFK	2.2296	85440	94734	133560	57564	55486	44693	0	27327	0	26259	34861	52379	14855	0	12311	16825	25840	34888	1.64913	1.82394	2.59742	1.41332	1.37059	1.09983		0.892681		0.513148	0.680872	1.052	0.317907		0.265391	0.251823	0.397985	0.530245
LmxM.05.1030	67	K	5.27633	0.000182472	Up	hypothetical protein, conserved OS=Leishmania_mexicana_MHOM/GT/2001/U1103 GN=LmxM.05.1030	LmxM.05.1030	1	0.000170216	103.87	2	SSAK(1)GAEVGAR	0.083664	163680	144170	145030	37978	0	0	0	71658	60632	101180	0	104450	0	0	0	0	0	47006	2.3338	2.26815	2.15263	0.339711				0.521104	0.419351	1.3273		1.9628						0.342419
LmxM.05.1040	293	K	3.79941	3.01919e-06	Up	stomatin-like protein OS=Leishmania_mexicana_MHOM/GT/2001/U1103 GN=LmxM.05.1040	LmxM.05.1040	1	1.16296e-09	139.78	3	AK(1)HSNEAISLR	1.7587	359750	337130	369150	68411	0	0	79587	72139	78228	262910	273110	261270	121300	111030	120090	66213	66195	74196	1.94964	1.82719	1.99099	0.444168			0.543902	0.500574	0.535467	1.40979	1.37994	1.38039	0.661819	0.594163	0.644355	0.414258	0.40269	0.459055
LmxM.05.1050	290	K	9.43267	0.000809398	Up	hypothetical protein, unknown function OS=Leishmania_mexicana_MHOM/GT/2001/U1103 GN=LmxM.05.1050	LmxM.05.1050	1	4.02866e-12	138	2	VVQDEVHDFTK(1)R	0.72624	0	182080	198140	0	14833	16589	0	0	16724	110800	117200	118910	38304	37062	35157	16058	16420	18949		2.40734	2.55317		0.216752	0.242718			0.32936	1.46417	1.55399	1.57769	0.521701	0.524657	0.505502	0.259583	0.272374	0.305723
LmxM.06.0030	113	K	7.84651	0.000231127	Up	WD domain, G-beta repeat, putative OS=Leishmania_mexicana_MHOM/GT/2001/U1103 GN=LmxM.06.0030	LmxM.06.0030	1	1.61414e-14	135.5	2	GK(1)QLSYIGLPSGK(1)R	-3.024	315780	292580	239660	36619	41833	0	0	0	26263	208050	218520	204740	0	0	0	42656	44210	36303	2.32288	2.15134	1.76965	0.272469	0.324696				0.198584	1.48602	1.49134	1.46661				0.226207	0.233207	0.189976
LmxM.06.0030	13	K	12.5139	1.78963e-09	Up	WD domain, G-beta repeat, putative OS=Leishmania_mexicana_MHOM/GT/2001/U1103 GN=LmxM.06.0030	LmxM.06.0030	1	6.40816e-62	214.78	2	IQGK(1)TVSYEGHPER	-1.2296	918920	747450	783520	68818	67701	66091	55832	59787	59624	525470	553290	551170	64432	61038	66113	75644	77936	85823	3.54086	2.87896	3.03062	0.268227	0.27526	0.263737	0.222244	0.244764	0.236163	1.96604	1.978	2.06817	0.271451	0.258063	0.280324	0.210131	0.215352	0.23526
LmxM.06.0120	153	K	2.46773	0.000225572	Up	cyclophilin OS=Leishmania_mexicana_MHOM/GT/2001/U1103 GN=LmxM.06.0120	LmxM.06.0120	1	1.90635e-31	91.032	2	HVVFGK(1)VLEGMEVVLR	-0.24528	143540	161620	168270	34886	45316	36732	73206	60405	71982	34789	0	12115	15342	14421	0	50564	49908	53740	2.30835	2.52381	2.64636	0.742539	0.971103	0.799031	1.22242	1.06295	1.26301	0.556911		0.204136	0.248214	0.23752		0.536005	0.522275	0.538208
LmxM.06.0250	242	K	6.14905	6.58584e-05	Up	hypothetical protein, conserved OS=Leishmania_mexicana_MHOM/GT/2001/U1103 GN=LmxM.06.0250	LmxM.06.0250	1	4.2316e-94	153.05	3	LHQSTQYQQVK(1)HLLAQR	0.52091	337990	267880	226490	66799	50076	61089	0	35688	34587	177100	158260	161770	31759	29619	33882	16510	22482	25973	3.06907	3.14829	2.08687	0.577097	0.461697	0.549612		0.327401	0.33501	1.75966	1.57848	1.57709	0.35332	0.316603	0.374127	0.160722	0.221366	0.260863
LmxM.06.0260	346	K	1.94715	0.00166116	Up	5'-3' exoribonuclease A, putative OS=Leishmania_mexicana_MHOM/GT/2001/U1103 GN=LmxM.06.0260	LmxM.06.0260	1	7.53973e-05	74.524	2	YLTHK(1)GEIDWR	0.95115	0	90899	85397	46105	46590	0	44927	36842	0	0	60383	0	0	45171	43337	0	0	0		1.67071	1.5742	0.860005	0.905026		0.869189	0.698766			1.10335			0.831616	0.834153
LmxM.06.0370	167	K	3.0043	5.19027e-10	Up	glutamine synthetase, putative OS=Leishmania_mexicana_MHOM/GT/2001/U1103 GN=LmxM.06.0370	LmxM.06.0370	1	6.42207e-83	221.56	2	GAYYCSTGSK(1)SAWGR	0.30509	1005400	1041900	1027300	317720	308360	326100	272290	269390	276300	714280	720770	731160	334200	328080	328500	210080	214260	229040	2.01811	2.12157	2.03454	0.676653	0.645172	0.71444	0.680054	0.692395	0.701541	1.48889	1.53472	1.59811	0.714013	0.706907	0.707762	0.359301	0.363139	0.384461
LmxM.06.0370	282	K	2.24506	8.92017e-08	Up	glutamine synthetase, putative OS=Leishmania_mexicana_MHOM/GT/2001/U1103 GN=LmxM.06.0370	LmxM.06.0370	1	3.14158e-30	121.86	2	TVSK(1)DIIFYGSENNKR	-0.39661	126270	121530	121050	46483	52197	51053	43431	45324	45211	88092	0	94621	0	25490	34836	27011	31198	35316	1.97143	1.92482	1.8647	0.77	0.849451	0.869985	0.843698	0.906099	0.892876	1.42825		1.60863		0.427196	0.583788	0.359327	0.411276	0.461092
LmxM.06.0370	303	K	2.21559	7.76527e-09	Up	glutamine synthetase, putative OS=Leishmania_mexicana_MHOM/GT/2001/U1103 GN=LmxM.06.0370	LmxM.06.0370	1	1.40921e-37	144.72	3	LTGTHETSK(1)VSEFSAGVGTR	1.1615	167250	163370	157630	70799	73763	67861	57126	57372	55620	106590	96473	99268	64561	61568	63831	55150	63663	61034	1.88322	1.86608	1.75119	0.845817	0.865733	0.833994	0.800338	0.82718	0.792193	1.24634	1.1523	1.21711	0.773744	0.744158	0.771456	0.529111	0.605267	0.574698
LmxM.06.0370	41	K	13.8342	1.91678e-08	Up	glutamine synthetase, putative OS=Leishmania_mexicana_MHOM/GT/2001/U1103 GN=LmxM.06.0370	LmxM.06.0370	1	2.772e-88	236.7	2	TMYLSQENVAK(1)HPK	-1.5021	1376100	1128200	1132600	79371	83912	103380	68083	57846	65346	540520	565170	544440	147750	138740	135260	99074	91615	99532	3.70257	3.07939	3.00671	0.226585	0.235336	0.303598	0.227928	0.199293	0.222402	1.51026	1.61308	1.59511	0.42313	0.400711	0.390632	0.227133	0.208135	0.22395
LmxM.06.0370	19	K	3.4819	6.6213e-08	Up	glutamine synthetase, putative OS=Leishmania_mexicana_MHOM/GT/2001/U1103 GN=LmxM.06.0370	LmxM.06.0370	1	5.80464e-23	135.21	2	VTYIWLSGK(1)DSHHDIR	-1.0372	541260	509110	507840	147520	151340	151880	106240	111980	110480	323040	314380	327360	156560	149610	160560	105670	111560	119230	2.29038	2.18543	2.12026	0.662319	0.667523	0.701472	0.559364	0.606747	0.591358	1.41953	1.41118	1.50839	0.70514	0.679575	0.729263	0.380996	0.398598	0.421911
LmxM.06.0410	128	K	6.7411	1.67614e-07	Up	60S ribosomal protein L19, putative OS=Leishmania_mexicana_MHOM/GT/2001/U1103 GN=LmxM.06.0410	LmxM.06.0410	1	0.00470798	96.51	2	AK(1)GNVFR	-1.3528	623920	471300	466330	91195	93373	94788	52937	52502	55423	293480	302360	296490	56346	55999	58372	22987	22198	0	2.93982	2.32563	2.245	0.405729	0.409264	0.42192	0.327821	0.316818	0.346707	1.4716	1.52611	1.4844	0.311373	0.29984	0.309079	0.195871	0.190777
LmxM.06.0410	162	K	11.5131	5.58705e-11	Up	60S ribosomal protein L19, putative OS=Leishmania_mexicana_MHOM/GT/2001/U1103 GN=LmxM.06.0410	LmxM.06.0410	1	2.92107e-151	316.09	2	QLAEQLAAK(1)HLR	-0.22277	836220	744790	768860	82070	72906	69847	53154	51932	52394	369490	354320	360690	65256	66547	66261	30292	30361	34224	3.15716	2.94482	2.96588	0.292572	0.256052	0.249119	0.263752	0.251103	0.262625	1.48456	1.43298	1.44696	0.288949	0.28551	0.281129	0.206823	0.20908	0.232156
LmxM.06.0410	214	K	13.7764	0.000262046	Up	60S ribosomal protein L19, putative OS=Leishmania_mexicana_MHOM/GT/2001/U1103 GN=LmxM.06.0410	LmxM.06.0410	1	3.98367e-16	137.58	2	SAAPAAK(1)SAAPAAK	0.57354	638610	626820	659530	62344	0	61560	26293	30438	0	453350	447990	430870	159400	42510	40258	0	0	0	1.94464	1.99892	2.05196	0.179254		0.177086	0.105227	0.118703		1.46911	1.4613	1.39411	0.569268	0.147099	0.137761
LmxM.06.0570	123	K	21.012	8.52301e-09	Up	60S ribosomal protein L23a, putative OS=Leishmania_mexicana_MHOM/GT/2001/U1103 GN=LmxM.06.0570	LmxM.06.0570	1	2.6031e-19	138.71	2	VNTLIRPDGLK(1)K	-1.9214	732220	696880	705280	53285	54739	54484	0	0	0	637790	637240	652700	34125	0	37603	0	0	0	1.82837	1.73564	1.74127	0.0835666	0.0855319	0.0833888				1.09972	1.16823	1.14001	0.0894492		0.0989559
LmxM.06.0700	673	K	8.65943	0.00171097	Up	C2 domain/Ankyrin repeats (3 copies), putative OS=Leishmania_mexicana_MHOM/GT/2001/U1103 GN=LmxM.06.0700	LmxM.06.0700	1	2.40601e-35	115.15	3	SVVAAK(1)SGNTILHAAACGGQAEVAQWLR	1.0829	178980	140760	172410	32328	0	0	0	0	14935	0	0	85817	0	0	0	0	0	0	2.28883	1.83883	2.29364	0.30545					0.188909			0.955192
LmxM.06.0730	142	K	2.02236	8.34786e-06	Up	threonine ammonia-lyase OS=Leishmania_mexicana_MHOM/GT/2001/U1103 GN=LmxM.06.0730	LmxM.06.0730	1	1.20221e-07	123.42	2	LHAEFNK(1)VAGK	0.11119	410730	360640	343630	215270	204620	209210	190860	185630	209380	216640	221290	221260	163530	160900	176400	86783	95343	98205	2.03055	1.7217	1.71694	1.00436	0.938482	0.934491	0.824605	0.810656	0.896124	1.24106	1.23292	1.24811	0.835455	0.801765	0.884219	0.378231	0.430064	0.427501
LmxM.06.0730	123	K	1.9832	0.000511916	Up	threonine ammonia-lyase OS=Leishmania_mexicana_MHOM/GT/2001/U1103 GN=LmxM.06.0730	LmxM.06.0730	1	1.15034e-05	89.382	2	LYHGNFYYCK(1)PDLQSR	-0.12437	0	156980	148440	0	79186	81434	0	91795	0	0	0	0	0	0	0	0	0	0		1.40701	1.39247		0.681862	0.682918		0.752623
LmxM.06.0860	282	K	5.17278	9.20524e-07	Up	dihydrofolate reductase-thymidylate synthase OS=Leishmania_mexicana_MHOM/GT/2001/U1103 GN=LmxM.06.0860	LmxM.06.0860	1	0.00131871	109.36	2	LPLLTTK(1)R	-0.53526	157620	131100	134510	0	35286	31962	21697	23605	25986	90556	96312	100300	36227	33660	43077	12170	0	0	2.43985	1.94418	2.15536		0.484399	0.44134	0.366936	0.387683	0.426628	1.17539	1.22963	1.25811	0.565805	0.533354	0.687542	0.249772
LmxM.06.0960	151	K	10.0166	1.96643e-05	Up	cell cycle associated protein MOB1, putative OS=Leishmania_mexicana_MHOM/GT/2001/U1103 GN=LmxM.06.0960	LmxM.06.0960	1	0.00125698	92.677	2	SYVK(1)NIFR	-0.47168	179820	165210	167160	13097	0	12244	0	0	0	56100	55120	53389	10865	0	9477.7	0	0	0	2.13271	1.92612	2.07172	0.211527		0.196499				0.869213	0.869378	0.769753	0.165806		0.147505
LmxM.06.1070	268	K	5.1382	0.0177055	Up	deoxyribose-phosphate aldolase, putative OS=Leishmania_mexicana_MHOM/GT/2001/U1103 GN=LmxM.06.1070	LmxM.06.1070	1	1.91539e-21	160.98	2	STAMQYVQAGVK(1)R	1.8037	133180	133690	132840	5449.1	0	0	30784	38019	32314	79933	82087	86122	31978	31340	25723	27743	0	26935	2.32276	2.26332	2.33504	0.0941075			0.49254	0.66292	0.546422	1.38953	1.50208	1.54943	0.533889	0.614	0.497838	0.370248		0.380198
LmxM.07.0220	228	K	5.66115	0.0103726	Up	hypothetical protein, conserved OS=Leishmania_mexicana_MHOM/GT/2001/U1103 GN=LmxM.07.0220	LmxM.07.0220	1	5.97615e-07	77.431	3	HHGSSSATTAAHALPK(1)SIR	0.89009	119940	0	130710	27936	0	0	0	0	21392	90372	77331	90568	57145	0	59860	0	26082	0	1.81924		2.02429	0.372011					0.30692	1.33145	1.0869	1.3185	0.855608		0.891246		0.363633
LmxM.07.0290	177	K	2.81171	0.00267444	Up	Uncharacterised protein family (UPF0172), putative OS=Leishmania_mexicana_MHOM/GT/2001/U1103 GN=LmxM.07.0290	LmxM.07.0290	1	5.86775e-18	114.5	2	CSCNK(1)TISLPSQASADER	0.43406	97933	103390	99488	26835	0	0	40346	0	42156	62356	85186	85651	0	0	10948	0	0	0	1.4987	1.59852	1.48343	0.388716			0.592771		0.647643	0.902256	1.27914	1.30466			0.174294
LmxM.07.0500	213	K	2.93972	7.76025e-05	Up	60S ribosomal protein L7a, putative OS=Leishmania_mexicana_MHOM/GT/2001/U1103 GN=LmxM.07.0500	LmxM.07.0500	1	2.88408e-173	229.38	2	TATCVAITDVNAEDEATLK(1)NLIR	0.088982	151970	236060	246530	81133	67769	62214	60424	56730	66579	100820	174240	131030	31144	26303	30149	18410	0	16137	1.54215	2.37646	2.51609	0.785779	0.659855	0.590751	0.756664	0.716148	0.868563	0.877913	1.58604	1.13534	0.365314	0.30706	0.355934	0.265461		0.225415
LmxM.07.0500	71	K	13.6528	1.41568e-05	Up	60S ribosomal protein L7a, putative OS=Leishmania_mexicana_MHOM/GT/2001/U1103 GN=LmxM.07.0500	LmxM.07.0500	1	0.000485378	90.689	2	LK(1)VPPALNQFTK	-0.86311	2807800	2826000	2806400	243900	236610	244990	0	0	104700	1958500	1983900	1982400	0	0	0	0	0	0	1.71809	1.71551	1.7271	0.142438	0.138919	0.140274			0.0823613	1.02835	1.08892	1.03576
LmxM.07.0500	81	K	7.45125	1.66067e-07	Up	60S ribosomal protein L7a, putative OS=Leishmania_mexicana_MHOM/GT/2001/U1103 GN=LmxM.07.0500	LmxM.07.0500	1	8.56086e-54	208.23	2	VPPALNQFTK(1)VLDR	0.16961	775030	995840	1119000	166530	132470	126450	102050	93652	99937	367170	949100	739850	78896	112200	133990	0	11588	22448	2.03288	2.59133	2.95196	0.416888	0.333395	0.310356	0.330317	0.305584	0.336988	0.826411	2.23306	1.657	0.239205	0.338559	0.408878		0.0429425	0.0810515
LmxM.07.0500	33	K	11.4218	3.4373e-07	Up	60S ribosomal protein L7a, putative OS=Leishmania_mexicana_MHOM/GT/2001/U1103 GN=LmxM.07.0500	LmxM.07.0500	1	2.0483e-120	228.73	2	PK(1)NFGIGQDVPYAR	-0.28903	1653600	1658700	1682700	186520	153500	171590	97902	0	94653	1583900	1587200	1660800	150160	76427	128780	42883	0	25464	2.24561	2.23466	2.29825	0.241748	0.200014	0.218044	0.164067		0.165247	1.84573	1.93344	1.92578	0.235712	0.119399	0.203461	0.0827497		0.0476016
LmxM.07.0600	450	K	7.9655	0.000235746	Up	electron transfer flavoprotein-ubiquinone oxidoreductase, putative OS=Leishmania_mexicana_MHOM/GT/2001/U1103 GN=LmxM.07.0600	LmxM.07.0600	1	2.26256e-21	148.62	3	EPWTLK(1)HTTPDNLSLKPAK	0.18433	183480	161360	152790	0	0	21912	0	0	22298	0	75293	75938	0	0	27093	30039	0	27952	2.77038	2.4179	2.276			0.339203			0.285514		1.22125	1.22098			0.371783	0.240651		0.237334
LmxM.07.0640	193	K	9.23653	1.33371e-07	Up	eukaryotic translation initiation factor 3 subunit h OS=Leishmania_mexicana_MHOM/GT/2001/U1103 GN=LmxM.07.0640	LmxM.07.0640	1	1.26038e-87	180.11	2	AYTPTAAYYK(1)YDSLVSTER	1.1219	655960	658370	639670	51982	59833	60142	46431	60006	0	374630	402870	369950	64319	62096	65034	35371	41655	43070	2.60556	2.65864	2.57483	0.258188	0.304366	0.3083	0.231758	0.311884		1.48983	1.62165	1.55481	0.292783	0.286936	0.298064	0.175695	0.217421	0.221019
LmxM.36.1250	114	K	5.94253	1.80301e-10	Up	40S ribosomal protein S9, putative OS=Leishmania_mexicana_MHOM/GT/2001/U1103 GN=LmxM.36.1250	LmxM.36.1250	1	3.60419e-29	188.6	2	RLQTIVFK(1)AGLAK	0.69507	586640	585200	568550	89432	83971	83370	66884	69039	68210	405150	446480	451730	82401	77500	83370	56249	53183	59795	2.26133	2.15664	2.11128	0.395375	0.372348	0.370057	0.340637	0.363592	0.355454	1.45387	1.67197	1.73702	0.423696	0.405381	0.441692	0.351712	0.32266	0.380793
LmxM.07.0800	346	K	1.51613	0.0112811	Up	flavoprotein subunit-like protein OS=Leishmania_mexicana_MHOM/GT/2001/U1103 GN=LmxM.07.0800	LmxM.07.0800	1	1.26927e-11	94.66	2	EMEWHCK(1)HYVGR	-1.5286	43788	26002	29184	70901	69945	69702	37212	39392	39760	27155	26277	27560	18707	17723	19236	0	0	0	1.78524	1.06203	1.20495	0.824167	0.826211	0.80601	0.955389	0.952966	0.980738	0.914117	0.910353	1.00154	0.693227	0.668355	0.70045
LmxM.07.0800	301	K	2.29118	3.58168e-05	Up	flavoprotein subunit-like protein OS=Leishmania_mexicana_MHOM/GT/2001/U1103 GN=LmxM.07.0800	LmxM.07.0800	1	1.83997e-17	132.44	2	GAGGIVVDK(1)HGQR	-0.080513	0	159820	170020	222060	217650	226950	129110	131700	140320	126120	123730	125990	0	67502	68309	16297	19845	0		1.88757	2.02986	0.746406	0.743422	0.758871	0.958516	0.921293	1.00085	1.22766	1.23951	1.32394		0.736087	0.719255	0.247748	0.300173
LmxM.07.0800	355	K	1.51834	0.00106456	Up	flavoprotein subunit-like protein OS=Leishmania_mexicana_MHOM/GT/2001/U1103 GN=LmxM.07.0800	LmxM.07.0800	1	1.73349e-07	85.813	2	GLMK(1)HYASGHEFCK	-1.4201	28083	25384	25278	56539	55959	0	0	29305	32645	22339	0	29476	0	0	15203	0	0	0	1.34096	1.21428	1.22235	0.769732	0.774164			0.83031	0.943089	0.880734		1.25455			0.648367
LmxM.07.1030	14	K	5.46008	3.04103e-06	Up	peptidyl-prolyl cis-trans isomerase/rotamase, putative OS=Leishmania_mexicana_MHOM/GT/2001/U1103 GN=LmxM.07.1030	LmxM.07.1030	1	4.26905e-27	185.18	2	AEHLLIK(1)HSGSR	-1.2054	2185200	2277300	2366000	480680	492220	483610	357930	364890	373650	1535700	1603100	1600400	457200	460750	458830	485030	487290	507270	2.81465	2.97908	2.95215	0.627719	0.64533	0.626759	0.41365	0.435156	0.454958	1.79896	1.98428	1.9421	0.561678	0.56562	0.587937	0.289934	0.300524	0.313009
LmxM.07.1070	127	K	6.1934	0.0066559	Up	RNA-editing complex protein, putative OS=Leishmania_mexicana_MHOM/GT/2001/U1103 GN=LmxM.07.1070	LmxM.07.1070	1	2.31997e-11	109.47	2	DAQYQCGGCGK(1)TFR	-0.84753	16714	66991	13721	8245	7577.8	9333.9	0	10872	6806.4	40060	41549	45076	0	7575.4	7151.2	0	2029.8	0	1.23239	5.21759	1.10459	0.366471	0.328081	0.434082		0.559348	0.344979	2.47204	3.08424	3.27646		0.381589	0.348817		0.0638273
LmxM.08.0290	124	K	7.93248	4.01629e-07	Up	iron superoxide dismutase A, mitochondrial OS=Leishmania_mexicana_MHOM/GT/2001/U1103 GN=LmxM.08.0290	LmxM.08.0290	1	5.53931e-15	165.39	2	PMPK(1)TLEDAIAK	-0.40996	1941100	1745000	1808000	234620	0	0	251840	257500	262760	1055100	1104900	1056800	393970	372150	377350	321690	308220	322980	2.81767	2.54235	2.56368	0.376499			0.302729	0.325188	0.327443	1.68545	1.75451	1.63782	0.532382	0.500271	0.533287	0.324005	0.328301	0.338669
LmxM.08.0290	132	K	6.16023	6.80249e-08	Up	iron superoxide dismutase A, mitochondrial OS=Leishmania_mexicana_MHOM/GT/2001/U1103 GN=LmxM.08.0290	LmxM.08.0290	1	3.94573e-89	208.35	2	TLEDAIAK(1)HFGSVK(1)DFK	-0.51759	2169200	1963200	1916400	260160	258360	240470	424570	416670	429980	1124300	1211400	1121700	457930	452990	453280	365820	399850	425230	2.96984	2.69771	2.56297	0.39376	0.410928	0.384429	0.48136	0.496295	0.505377	1.69393	1.81431	1.63961	0.583648	0.574338	0.604191	0.347514	0.401698	0.420547
LmxM.08.0290	96	K	1.52092	0.00160303	Up	iron superoxide dismutase A, mitochondrial OS=Leishmania_mexicana_MHOM/GT/2001/U1103 GN=LmxM.08.0290	LmxM.08.0290	1	5.72731e-100	197.17	3	K(1)VMFNQAAQHFNHSFFWK	-0.36087	380400	389760	394010	188130	186540	187280	334670	340540	354100	327960	331830	322640	317540	308020	318510	254100	267920	286950	1.33656	1.37449	1.35232	0.73074	0.761423	0.768352	0.973759	1.04095	1.06809	1.26809	1.27542	1.21031	1.03864	1.00224	1.08954	0.619475	0.690751	0.728302
LmxM.08.0290	61	K	6.44316	1.5205e-08	Up	iron superoxide dismutase A, mitochondrial OS=Leishmania_mexicana_MHOM/GT/2001/U1103 GN=LmxM.08.0290	LmxM.08.0290	1	1.81806e-39	179.31	2	QLELHYTK(1)HHR	-0.26789	903810	912580	906020	109660	113900	113800	181700	174740	175500	536650	532430	563480	278740	285850	285260	238420	239350	253000	2.5624	2.5968	2.50918	0.343697	0.375146	0.376733	0.426591	0.430999	0.42715	1.67433	1.65129	1.70561	0.735678	0.750504	0.787381	0.469012	0.497935	0.518141
LmxM.08.0410	869	K	1.96962	0.00711652	Up	WD domain, G-beta repeat, putative OS=Leishmania_mexicana_MHOM/GT/2001/U1103 GN=LmxM.08.0410	LmxM.08.0410	1	8.12297e-16	102.57	2	AHGK(1)SVNAAGPSYK	0.022717	63743	71717	74489	36875	33382	37018	0	0	25203	54077	0	61948	37973	35759	41094	0	0	12467	1.44362	1.66929	1.71405	0.92379	0.854927	0.944035			0.544853	1.34519		1.50355	0.788818	0.760773	0.880405			0.236781
LmxM.08.0470	67	K	2.59679	0.0161754	Up	small ubiquitin protein, putative OS=Leishmania_mexicana_MHOM/GT/2001/U1103 GN=LmxM.08.0470	LmxM.08.0470	1	0.0157976	69.915	2	KLIDAYCK(1)K	0.48133	108500	0	113160	0	38531	0	0	37529	0	93069	98077	0	0	0	0	0	0	0	1.27939		1.35337		0.509142			0.504708		1.10768	1.10567
LmxM.08.0510	722	K	5.37518	2.27443e-05	Up	ribose-phosphate pyrophosphokinase, putative OS=Leishmania_mexicana_MHOM/GT/2001/U1103 GN=LmxM.08.0510	LmxM.08.0510	1	5.0243e-22	159.44	2	NEYK(1)NYVLVGDVK	0.72146	218480	209760	201630	43630	0	34163	44142	0	41672	139320	166860	136990	49147	45684	47088	16246	0	32936	2.24115	2.27131	1.99594	0.401287		0.309489	0.464389		0.439265	1.35419	1.7695	1.48902	0.563764	0.516231	0.527332	0.208301		0.378231
LmxM.08.0860	133	K	13.7251	4.59455e-09	Up	hypothetical protein, unknown function OS=Leishmania_mexicana_MHOM/GT/2001/U1103 GN=LmxM.08.0860	LmxM.08.0860	1	3.05578e-158	244.45	2	TDSGSNANVYGK(1)HR	-0.112	126700	130420	136430	12999	11879	0	11294	10191	11284	55409	56499	62528	8409.2	11928	10036	0	0	0	2.5256	2.84881	2.80207	0.223115	0.192692		0.196143	0.181148	0.199789	1.44395	1.56429	1.69961	0.176495	0.251371	0.225683
LmxM.08.0890	88	K	2.2206	0.00564498	Up	mitochondrial DNA polymerase beta OS=Leishmania_mexicana_MHOM/GT/2001/U1103 GN=LmxM.08.0890	LmxM.08.0890	0.999975	4.28318e-09	117.45	2	LEELESK(1)TKPK	-0.97136	44004	32210	48853	0	0	0	20803	18687	22579	28225	32807	30642	14313	18719	20395	13128	17008	16268	1.80993	1.32247	2.03981				0.780835	0.685964	0.86239	1.13082	1.27187	1.24157	0.580195	0.78719	0.83699	0.462978	0.579556	0.573023
LmxM.08.1100	45	K	4.7797	0.0497997	Up	hypothetical protein, conserved OS=Leishmania_mexicana_MHOM/GT/2001/U1103 GN=LmxM.08.1100	LmxM.08.1100	1	0.000270888	116.13	2	NTK(1)IAIEMIR	-0.12387	528930	549060	593150	93516	0	0	120030	0	0	380540	410190	378270	0	110590	0	0	82433	0	1.48522	1.56672	1.65198	0.28041			0.375685			1.35533	1.49604	1.4182		0.332208			0.250478
LmxM.08.1100	252	K	10.2306	6.49165e-07	Up	hypothetical protein, conserved OS=Leishmania_mexicana_MHOM/GT/2001/U1103 GN=LmxM.08.1100	LmxM.08.1100	1	1.08988e-27	199.51	2	LTIK(1)HLEGQLGVWR	-1.8734	584100	600830	509370	53281	54064	68518	0	43067	39707	335880	432830	363350	73707	72578	87638	27525	35481	58143	2.6315	2.75073	2.27614	0.256334	0.263301	0.309509		0.212872	0.205603	1.91935	2.53281	2.18567	0.348175	0.349804	0.431841	0.132416	0.172977	0.288008
LmxM.08.1100	55	K	7.18222	6.48092e-09	Up	hypothetical protein, conserved OS=Leishmania_mexicana_MHOM/GT/2001/U1103 GN=LmxM.08.1100	LmxM.08.1100	1	7.87461e-16	144.27	2	YK(1)GEAPASYTR	3.1021	771930	834100	842140	107810	104250	0	103130	0	98271	459690	457910	464730	98690	0	102180	0	71076	68278	2.14921	2.35993	2.32559	0.320536	0.313765		0.320058		0.314465	1.62337	1.65596	1.7276	0.288102		0.311158		0.214141	0.209012
LmxM.08.1110	439	K	4.15469	7.72391e-05	Up	stress-induced protein sti1 OS=Leishmania_mexicana_MHOM/GT/2001/U1103 GN=LmxM.08.1110	LmxM.08.1110	1	6.18502e-14	141.29	2	GHAYFWTK(1)QYNR	2.0951	188220	225300	225560	48724	57596	59355	0	35901	0	178910	185840	187510	49740	48427	0	26394	26482	0	1.64631	1.98883	2.09183	0.422	0.525856	0.524275		0.365783		1.45606	1.5719	1.55714	0.475911	0.482341		0.217154	0.22581
LmxM.08.1110	534	K	3.23514	0.000613131	Up	stress-induced protein sti1 OS=Leishmania_mexicana_MHOM/GT/2001/U1103 GN=LmxM.08.1110	LmxM.08.1110	1	7.35232e-06	104.39	2	INK(1)LISAGIIR	-0.32057	140110	136640	128600	0	47230	46750	0	30060	32709	126370	123710	118260	44204	0	43391	32777	35584	39292	1.80093	1.77254	1.75262		0.633685	0.606827		0.450077	0.504507	1.51137	1.5377	1.44319	0.621531		0.635882	0.39629	0.44589	0.498242
LmxM.08.1110	431	K	5.77569	1.00296e-06	Up	stress-induced protein sti1 OS=Leishmania_mexicana_MHOM/GT/2001/U1103 GN=LmxM.08.1110	LmxM.08.1110	1	0.000989809	87.895	2	K(1)GHAYFWTK	1.6289	329490	294370	303060	65620	64960	54356	35472	40565	42777	221100	235660	242390	92880	0	86826	59380	59489	62718	2.35829	2.12638	2.29987	0.465068	0.485322	0.39288	0.300472	0.338204	0.3674	1.47246	1.63111	1.64713	0.727198		0.708525	0.399772	0.415087	0.442851
LmxM.08.1110	7	K	2.21453	2.37215e-05	Up	stress-induced protein sti1 OS=Leishmania_mexicana_MHOM/GT/2001/U1103 GN=LmxM.08.1110	LmxM.08.1110	1	9.48527e-05	106.93	2	MDATELK(1)NK	1.5759	58173	57298	57192	22483	29748	26636	21785	19942	25253	49523	46069	40785	21424	21025	22265	11194	13734	13674	1.80948	1.79873	1.8862	0.692488	0.965873	0.83668	0.801963	0.722559	0.942583	1.43331	1.38574	1.20446	0.728968	0.744716	0.789598	0.327518	0.416464	0.419603
LmxM.08_29.0120	142	K	6.09769	4.22074e-07	Up	proteasome regulatory non-ATPase subunit, putative OS=Leishmania_mexicana_MHOM/GT/2001/U1103 GN=LmxM.08_29.0120	LmxM.08_29.0120	1	9.6661e-71	239.98	2	GTK(1)NDLAQWGHEYLR	0.61153	293970	261600	267150	37187	39370	38584	33580	44049	43812	166350	168750	157570	57515	52661	47102	23147	0	0	2.674	2.30587	2.40944	0.428281	0.469245	0.449009	0.297344	0.392428	0.387337	1.51841	1.5563	1.39955	0.528126	0.482804	0.439617	0.19251
LmxM.08_29.0270	231	K	13.6963	0.000329649	Up	hypothetical protein OS=Leishmania_mexicana_MHOM/GT/2001/U1103 GN=LmxM.08_29.0270	LmxM.08_29.0270	1	2.14533e-21	163.59	2	TK(1)ADILGTIHGSP	-2.9011	696780	617070	599530	57366	0	45300	0	0	0	418800	425400	409440	40338	48729	0	0	0	0	2.12597	1.89879	1.84184	0.167099		0.118457				1.149	1.1967	1.13966	0.124819	0.149317
LmxM.08_29.0280	82	K	1.54531	0.000539773	Up	hypothetical protein OS=Leishmania_mexicana_MHOM/GT/2001/U1103 GN=LmxM.08_29.0280	LmxM.08_29.0280	1	0.00204521	77.072	2	YK(1)VPMTPR	0.62857	100200	90993	0	186070	194910	187750	104500	104150	114030	54594	0	62061	30086	29738	0	0	0	0	1.37879	1.37255		0.744482	0.804684	0.805671	0.948892	0.970079	1.06754	0.801878		0.972475	0.413927	0.422351
LmxM.08_29.0320	119	K	1.86432	2.15011e-05	Up	TPR repeat, putative OS=Leishmania_mexicana_MHOM/GT/2001/U1103 GN=LmxM.08_29.0320	LmxM.08_29.0320	1	5.62127e-10	126.17	3	AALHDANK(1)ALEFNPQNVR	0.52262	114250	105660	100880	47927	0	52197	59217	55634	48791	95853	104050	101780	21207	22658	33077	0	0	39580	1.84212	1.68435	1.61803	0.896307		0.961739	0.983483	0.942043	0.815515	1.37165	1.49825	1.47188	0.324883	0.348098	0.512789			0.434903
LmxM.08_29.0510	36	K	25.2612	7.10066e-07	Up	cofilin-like protein OS=Leishmania_mexicana_MHOM/GT/2001/U1103 GN=LmxM.08_29.0510	LmxM.08_29.0510	1	1.1973e-10	111.61	2	YVIMCIGADGK(1)K	3.2589	294200	288230	290800	0	11281	0	11984	0	0	222930	242200	240010	0	0	0	68183	0	0	1.68285	1.58838	1.64904		0.065234		0.0646167			1.31367	1.456	1.42971				0.279855
LmxM.08_29.0780	495	K	8.98728	5.48869e-06	Up	U-box domain protein, putative OS=Leishmania_mexicana_MHOM/GT/2001/U1103 GN=LmxM.08_29.0780	LmxM.08_29.0780	1	1.56938e-07	104.39	2	ISIDK(1)AAAPIR	-0.28074	355370	324600	327580	0	40701	0	34214	35861	0	0	245340	0	35074	33405	34174	22223	20964	23301	3.1505	2.80194	2.80177		0.357841		0.295182	0.321044			1.94554		0.326417	0.319156	0.324115	0.157539	0.154507	0.17172
LmxM.08_29.0820	295	K	4.7878	0.000599458	Up	CPC cysteine peptidase, Clan CA, family C1, Cathepsin B-like OS=Leishmania_mexicana_MHOM/GT/2001/U1103 GN=LmxM.08_29.0820	LmxM.08_29.0820	1	1.00152e-10	106.11	2	LVGWGVK(1)DGIPYWK	-2.7134	207660	290880	167980	44555	46930	0	0	0	61083	92597	73819	71348	49659	40243	36092	36109	40826	48078	2.73853	3.75533	2.19849	0.596844	0.588278				0.6304	1.25162	0.962089	0.916441	0.605363	0.481887	0.440897	0.316809	0.371339	0.441319
LmxM.08_29.0820	275	K	7.44678	8.24107e-07	Up	CPC cysteine peptidase, Clan CA, family C1, Cathepsin B-like OS=Leishmania_mexicana_MHOM/GT/2001/U1103 GN=LmxM.08_29.0820	LmxM.08_29.0820	1	1.90587e-44	170.92	3	SGVYK(1)HVSGDHLGGHAVK	2.2378	641900	651870	641150	103080	103000	101100	91604	92632	99259	395930	404660	405170	191110	182330	182910	201330	190690	197870	2.72375	2.70789	2.69999	0.444299	0.415437	0.390683	0.300902	0.303004	0.329611	1.72199	1.69697	1.67454	0.749614	0.702505	0.718953	0.568364	0.558082	0.584417
LmxM.08_29.0820	233	K	1.84126	0.00514911	Up	CPC cysteine peptidase, Clan CA, family C1, Cathepsin B-like OS=Leishmania_mexicana_MHOM/GT/2001/U1103 GN=LmxM.08_29.0820	LmxM.08_29.0820	1	0.000450933	64.906	2	YK(1)GVSSYSIK	2.5205	111550	109000	138420	72106	67243	0	0	0	71538	0	93977	0	0	0	0	0	60242	0	1.41713	1.35561	1.74518	0.930488	0.811997				0.711227		1.1799						0.527848
LmxM.08_29.0870	343	K	1.94296	0.00462507	Up	hypothetical protein, conserved OS=Leishmania_mexicana_MHOM/GT/2001/U1103 GN=LmxM.08_29.0870	LmxM.08_29.0870	1	8.5608e-09	120.33	2	LHALLK(1)SAPK	0.04899	524600	431840	374670	193950	199740	172820	302300	318170	330710	263150	291300	258940	327140	336540	336580	173680	180240	155230	1.87087	1.49666	1.3126	0.586053	0.627323	0.527321	0.967899	1.03978	1.06914	0.943672	1.08181	0.960477	1.17082	1.21056	1.23902	0.659249	0.730246	0.607705
LmxM.08_29.0870	479	K	13.7964	5.92198e-11	Up	hypothetical protein, conserved OS=Leishmania_mexicana_MHOM/GT/2001/U1103 GN=LmxM.08_29.0870	LmxM.08_29.0870	1	1.62053e-07	158.37	2	LK(1)HSLTER	0.57276	1167200	1195200	1204200	95303	101160	102140	98388	82099	97385	681360	679980	715630	112370	113350	109830	68378	69151	70527	3.18276	3.16727	3.22572	0.22019	0.242929	0.238298	0.240867	0.205147	0.240726	1.86826	1.93085	2.02964	0.307503	0.311757	0.309139	0.198454	0.21422	0.211114
LmxM.08_29.0880	174	K	8.20482	8.50415e-06	Up	ADP-ribosylation factor-like protein 3A, putative OS=Leishmania_mexicana_MHOM/GT/2001/U1103 GN=LmxM.08_29.0880	LmxM.08_29.0880	1	2.88134e-139	290.23	3	SGEGLHEGLEWAVK(1)NLKPK	0.82279	874830	852840	706390	118990	139060	182900	67235	72530	77838	445440	580650	491240	99313	129610	134040	83581	93573	128640	3.20339	2.96776	2.4156	0.354178	0.415054	0.530171	0.244029	0.265827	0.28384	1.68074	2.2612	1.89027	0.372849	0.479133	0.502378	0.237665	0.283578	0.40175
LmxM.08_29.0880	29	K	13.8476	1.40003e-07	Up	ADP-ribosylation factor-like protein 3A, putative OS=Leishmania_mexicana_MHOM/GT/2001/U1103 GN=LmxM.08_29.0880	LmxM.08_29.0880	1	1.75886e-79	163.93	2	MLILGLDNAGK(1)TSILR	1.1637	457730	305240	392230	25335	36961	35600	24084	28014	30220	238900	414020	237030	25143	28625	35435	20564	19543	12598	3.73744	2.36854	2.99089	0.168155	0.245994	0.230107	0.194919	0.228947	0.245728	2.01005	3.59522	2.03382	0.210486	0.235962	0.296147	0.13039	0.132066	0.0877326
LmxM.08_29.0990	129	K	2.15298	1.82356e-05	Up	hypothetical protein, conserved OS=Leishmania_mexicana_MHOM/GT/2001/U1103 GN=LmxM.08_29.0990	LmxM.08_29.0990	1	2.18522e-177	234.93	2	AAAASGK(1)SASGGGVENR	-0.70683	102080	101380	102580	35971	35786	38024	48036	44977	45883	58912	61327	64568	63618	61857	65975	31693	34093	35151	1.58341	1.66967	1.66254	0.643381	0.663382	0.687737	0.882698	0.860135	0.829006	1.07641	1.08297	1.18331	0.956467	0.920991	1.07219	0.615725	0.601695	0.723941
LmxM.08_29.1070	119	K	24.5689	1.28163e-07	Up	ribosomal protein L1a, putative OS=Leishmania_mexicana_MHOM/GT/2001/U1103 GN=LmxM.08_29.1070	LmxM.08_29.1070	1	2.72071e-10	129.56	2	K(1)INLHQK(1)R	-1.1458	899050	813090	926640	0	62551	61745	25002	34269	29180	435180	493990	493870	41991	33322	33635	0	0	0	3.11473	2.79127	3.06834		0.138981	0.143535	0.0908534	0.124058	0.111359	1.09069	1.25873	1.29095	0.126414	0.101464	0.105883
LmxM.08_29.1070	334	K	9.99038	1.05337e-05	Up	ribosomal protein L1a, putative OS=Leishmania_mexicana_MHOM/GT/2001/U1103 GN=LmxM.08_29.1070	LmxM.08_29.1070	1	0.0056394	92.319	2	LNPYVK(1)R	-0.070423	2016700	1775000	1789800	332360	334790	336750	126200	122490	0	1251800	1262900	1278200	168030	161610	168030	0	86578	82020	3.09937	2.70307	2.62901	0.32921	0.32998	0.347264	0.203433	0.196707		1.39175	1.4275	1.48214	0.224399	0.218296	0.234647		0.250462	0.239785
LmxM.08_29.1070	105	K	9.36031	1.48926e-10	Up	ribosomal protein L1a, putative OS=Leishmania_mexicana_MHOM/GT/2001/U1103 GN=LmxM.08_29.1070	LmxM.08_29.1070	1	2.92182e-07	150.88	2	MFAPTK(1)IFR	-0.21032	1713200	1883100	1849000	0	283360	285930	183680	180640	178800	1488200	1558200	1527700	192710	181960	205160	64607	69127	73418	2.65067	2.88701	2.73426		0.281171	0.296844	0.298085	0.292045	0.304732	1.66573	1.77316	1.78339	0.259092	0.24744	0.288428	0.186006	0.201325	0.216083
LmxM.08_29.1070	45	K	7.31785	2.05991e-06	Up	ribosomal protein L1a, putative OS=Leishmania_mexicana_MHOM/GT/2001/U1103 GN=LmxM.08_29.1070	LmxM.08_29.1070	1	1.71011e-121	216.01	3	NDIVQFVHTNMAK(1)NSR	1.3486	1035300	877050	874050	177250	187060	214080	0	116120	0	791690	703890	773090	161180	0	0	0	47766	64513	2.42396	2.03475	1.95592	0.267471	0.280882	0.336322		0.284089		1.34094	1.2121	1.36568	0.327923				0.210513	0.287327
LmxM.08_29.1140	6	K	2.03175	0.000257124	Up	tryparedoxin-like protein OS=Leishmania_mexicana_MHOM/GT/2001/U1103 GN=LmxM.08_29.1140	LmxM.08_29.1140	1	2.81091e-07	104.49	2	HK(1)GGPFLSQFPDLK	-2.9431	70746	66736	72916	0	0	48103	48926	47678	55720	75063	66517	67313	59150	55472	0	0	27486	0	1.67022	1.4894	1.75477			0.920111	0.771449	0.706756	0.826745	1.39589	1.28084	1.28388	1.00442	1.00404			0.336568
LmxM.08_29.1150	16	K	19.8977	0.000149037	Up	tryparedoxin 2, putative OS=Leishmania_mexicana_MHOM/GT/2001/U1103 GN=LmxM.08_29.1150	LmxM.08_29.1150	1	1.69168e-135	188.82	3	FFPHSTSFLK(1)GSATDVALSSLAGK	2.5365	639900	586240	704390	25927	35861	50241	0	0	0	343170	415800	377460	76938	78601	67755	0	54387	59509	2.75233	2.484	3.04137	0.0933866	0.13098	0.191646				1.45427	1.74468	1.52793	0.322279	0.33073	0.288709		0.221865	0.238846
LmxM.08_29.1150	56	K	8.34226	1.62366e-06	Up	tryparedoxin 2, putative OS=Leishmania_mexicana_MHOM/GT/2001/U1103 GN=LmxM.08_29.1150	LmxM.08_29.1150	1	2.16935e-41	161.23	2	GFTPQLVEFYK(1)THAK(1)SK	0.33803	4082800	4182700	4055700	456230	475200	475970	662590	734430	675970	2917000	3025000	2950800	729490	707780	777910	526300	507870	570150	2.78423	2.80991	2.77639	0.260541	0.275181	0.28786	0.371518	0.417732	0.393943	1.95989	2.01241	1.89379	0.484473	0.472174	0.525541	0.33802	0.328477	0.362814
LmxM.08_29.1150	6	K	3.63155	9.01228e-09	Up	tryparedoxin 2, putative OS=Leishmania_mexicana_MHOM/GT/2001/U1103 GN=LmxM.08_29.1150	LmxM.08_29.1150	1	5.23569e-09	115.41	2	K(1)FFPHSTSFLK	0.55385	234240	238130	236240	70561	70197	74054	84431	80092	79809	182370	191210	191240	96892	90500	87173	53116	52909	61040	2.0949	2.098	2.12092	0.52846	0.533111	0.587362	0.62086	0.597438	0.609978	1.60696	1.66824	1.60963	0.843906	0.791788	0.772353	0.447394	0.448785	0.509408
LmxM.08_29.1160	56	K	15.2785	1.18606e-09	Up	tryparedoxin 1, putative OS=Leishmania_mexicana_MHOM/GT/2001/U1103 GN=LmxM.08_29.1160	LmxM.08_29.1160	1	6.05268e-107	217.77	3	GFTPQLVEFYDK(1)HHVSK	0.63385	10396000	9732100	9863800	569880	598890	592380	651290	637010	639300	5465100	5604300	5454400	782120	755230	779750	917070	955970	1020500	4.1277	3.69378	3.58199	0.255021	0.280599	0.27456	0.229344	0.226463	0.226758	2.12497	2.14789	2.13147	0.278879	0.271461	0.290236	0.168045	0.17323	0.184857
LmxM.08_29.1160	6	K	10.8591	4.81565e-07	Up	tryparedoxin 1, putative OS=Leishmania_mexicana_MHOM/GT/2001/U1103 GN=LmxM.08_29.1160	LmxM.08_29.1160	1	8.45103e-06	100.84	2	K(1)HLGDAVK(1)LQK	-2.9757	1168300	803440	1060600	70088	86496	77908	72526	118180	104260	373290	456540	516880	141170	74889	73795	79981	172880	111520	4.62099	3.03778	3.83681	0.312446	0.403714	0.359714	0.254417	0.418537	0.368396	1.4459	1.74304	2.01216	0.501447	0.268154	0.273628	0.145999	0.312077	0.20124
LmxM.08_29.1160	93	K	22.1698	2.85332e-10	Up	tryparedoxin 1, putative OS=Leishmania_mexicana_MHOM/GT/2001/U1103 GN=LmxM.08_29.1160	LmxM.08_29.1160	1	2.63758e-29	187.82	2	MPWLALPFEK(1)R	-1.6905	3135900	3393200	3304400	109680	125710	117590	152710	153810	185570	2853800	2934200	2740400	199500	193310	190410	176850	178700	188500	3.39316	3.50973	3.27019	0.133758	0.160512	0.148528	0.146548	0.149017	0.179377	3.02397	3.06464	2.91842	0.193859	0.189357	0.193146	0.0883137	0.0882475	0.093054
LmxM.08_29.1160	102	K	6.25748	2.02651e-06	Up	tryparedoxin 1, putative OS=Leishmania_mexicana_MHOM/GT/2001/U1103 GN=LmxM.08_29.1160	LmxM.08_29.1160	1	2.44017e-08	153.33	2	RNIVEALTK(1)VFK	-1.0518	2299700	2584700	2863700	408270	416300	418220	349970	367440	316650	1507700	2156500	2120600	528770	415880	399180	711650	742280	743640	2.61477	2.80929	2.97803	0.523191	0.558556	0.555089	0.352911	0.374075	0.321632	1.67877	2.3668	2.37308	0.539922	0.428072	0.425486	0.373431	0.385183	0.385751
LmxM.08_29.1240	645	K	3.18182	3.37728e-06	Up	Hsp70 protein/TPR repeat, putative OS=Leishmania_mexicana_MHOM/GT/2001/U1103 GN=LmxM.08_29.1240	LmxM.08_29.1240	1	1.04854e-100	211.47	3	LGLWK(1)NAVNNCTSALEIASDHPK	-1.7643	297860	337700	339540	99382	0	93554	92644	102830	0	224190	256020	236400	89511	83342	86246	75454	71913	0	1.88531	2.02145	2.05844	0.618462		0.574406	0.611982	0.694852		1.24912	1.41332	1.29359	0.549154	0.528129	0.553477	0.415073	0.40223
LmxM.08_29.1270	611	K	7.20875	7.59551e-06	Up	serine peptidase, putative OS=Leishmania_mexicana_MHOM/GT/2001/U1103 GN=LmxM.08_29.1270	LmxM.08_29.1270	1	1.50083e-33	107.15	3	SDRPTGSFLFLGPTGVGK(1)TELSK	0.060497	135610	143330	145130	0	12205	0	0	0	17524	71756	74206	71857	0	14985	0	0	0	0	1.50298	1.55281	1.54433		0.205049				0.220372	0.985541	0.992836	1.01918		0.195855
LmxM.08_29.1310	487	K	4.99688	2.38958e-08	Up	carnitine/choline acetyltransferase, putative OS=Leishmania_mexicana_MHOM/GT/2001/U1103 GN=LmxM.08_29.1310	LmxM.08_29.1310	1	0.000952661	125.5	2	EMLTK(1)VIR	-0.49881	262680	226870	219480	46196	51396	45827	53675	55579	53572	127890	129110	123380	51135	0	46073	40332	0	0	2.85718	2.41648	2.37957	0.458083	0.516251	0.471702	0.537401	0.556126	0.52364	1.3287	1.36494	1.28959	0.538171		0.475217	0.316945
LmxM.08_29.1310	370	K	2.84928	5.03857e-05	Up	carnitine/choline acetyltransferase, putative OS=Leishmania_mexicana_MHOM/GT/2001/U1103 GN=LmxM.08_29.1310	LmxM.08_29.1310	1	2.22705e-83	249.45	2	HLSVTYGK(1)SFVSHIR	-1.4646	740610	615880	579560	205470	202350	200580	289540	269720	300520	390860	382980	344480	288170	273740	290010	230980	218500	269650	2.43223	1.98065	1.89717	0.615166	0.613676	0.62336	0.875266	0.814854	0.886896	1.22608	1.22246	1.08712	0.915704	0.865803	0.903156	0.548041	0.510159	0.618725
LmxM.08_29.1470	637	K	7.80406	1.80649e-08	Up	hypothetical protein, conserved OS=Leishmania_mexicana_MHOM/GT/2001/U1103 GN=LmxM.08_29.1470	LmxM.08_29.1470	1	3.41498e-16	132.9	2	TK(1)ADHMMLLASK	-0.15397	185540	168980	171010	21005	0	21577	22848	0	23144	98321	96350	97601	25083	22020	0	0	21430	0	2.62714	2.35608	2.36934	0.318287		0.321204	0.30708		0.309621	1.40935	1.3282	1.36265	0.329493	0.286264			0.240932
LmxM.08_29.1690	191	K	2.01364	0.0277244	Up	Acyl-coenzyme A thioesterase, putative OS=Leishmania_mexicana_MHOM/GT/2001/U1103 GN=LmxM.08_29.1690	LmxM.08_29.1690	1	1.23739e-34	117.03	3	VVSAIELTDPFDIELHK(1)HYVK	-1.2442	98393	86067	88225	22743	22384	21071	75007	109990	76630	16589	47342	33348	64682	36852	60413	55098	73180	43870	2.01939	1.65098	1.75496	0.383416	0.376967	0.369382	1.19323	1.80458	1.261	0.307478	0.914389	0.672129	1.13145	0.643983	1.06983	0.829425	1.13323	0.693838
LmxM.08_29.1720	100	K	7.07388	1.59203e-06	Up	histone H2A, putative OS=Leishmania_mexicana_MHOM/GT/2001/U1103 GN=LmxM.08_29.1720	LmxM.08_29.1720	1	0	302.78	3	HDDDISSLLK(1)NVTLSHSGVVPSVSK	0.20393	1181400	824100	1202300	254680	273100	267630	163140	159320	156730	603210	1136500	821010	215190	298340	213550	259530	211180	232540	3.36846	2.30113	3.39198	0.495954	0.502315	0.476271	0.386111	0.349412	0.351917	1.39525	2.63235	1.88719	0.465215	0.65413	0.473988	0.429792	0.353773	0.388811
LmxM.08_29.1760	299	K	3.09742	4.53656e-10	Up	paraflagellar rod protein 1D, putative OS=Leishmania_mexicana_MHOM/GT/2001/U1103 GN=LmxM.08_29.1760	LmxM.08_29.1760	1	4.70492e-50	208.6	2	ADLEDAEAVK(1)R	-0.71715	1435400	1388300	1375200	365790	371560	355730	400190	399710	407130	759230	798250	801650	499290	490420	497120	189160	196590	196620	2.01783	1.99169	1.91768	0.669886	0.659821	0.633645	0.610288	0.619734	0.633811	1.4076	1.52627	1.51249	0.635334	0.627631	0.64099	0.446335	0.483321	0.465465
LmxM.08_29.1760	356	K	3.83807	1.24592e-05	Up	paraflagellar rod protein 1D, putative OS=Leishmania_mexicana_MHOM/GT/2001/U1103 GN=LmxM.08_29.1760	LmxM.08_29.1760	1	1.24102e-15	144.27	3	RIEEVDREEK(1)R	0.43396	139680	138600	145820	30479	0	0	34770	30382	0	70040	70912	75174	49933	0	47615	0	0	0	1.57334	1.59324	1.62931	0.447248			0.424866	0.377446		1.04048	1.0864	1.13646	0.509114		0.491941
LmxM.08_29.1760	423	K	8.24607	0.000225124	Up	paraflagellar rod protein 1D, putative OS=Leishmania_mexicana_MHOM/GT/2001/U1103 GN=LmxM.08_29.1760	LmxM.08_29.1760	1	9.1644e-21	156.14	2	LEVHK(1)EHLEYFR	0.63126	215900	197600	169220	0	0	0	0	21965	20862	77207	73850	77070	0	0	22422	0	0	0	1.89276	1.7679	1.47161					0.212385	0.202542	0.892682	0.880595	0.906828			0.180301
LmxM.08_29.1760	24	K	1.76127	0.00122603	Up	paraflagellar rod protein 1D, putative OS=Leishmania_mexicana_MHOM/GT/2001/U1103 GN=LmxM.08_29.1760	LmxM.08_29.1760	1	2.06464e-74	129.02	3	LK(1)TACLENEELVQELHISDWSETQR	-1.1282	478390	344780	366150	0	163960	155330	205090	234080	221010	0	197850	121550	229140	230670	0	111980	0	0	1.73444	1.2757	1.31685		0.750934	0.713588	0.80664	0.936033	0.887371		0.975654	0.591464	0.751998	0.761366		0.681457
LmxM.08_29.1760	543	K	8.60891	5.52165e-06	Up	paraflagellar rod protein 1D, putative OS=Leishmania_mexicana_MHOM/GT/2001/U1103 GN=LmxM.08_29.1760	LmxM.08_29.1760	1	1.43713e-06	129.28	2	SK(1)MVEYK(1)SHLTK	-0.53646	1273500	1250100	1281700	144150	145510	139670	106970	99448	102310	472690	493700	486190	244120	251640	247420	100890	0	108590	2.65891	2.66365	2.65454	0.392082	0.383781	0.369507	0.242284	0.229008	0.236558	1.3016	1.40201	1.36241	0.461366	0.47831	0.473826	0.353568		0.381806
LmxM.08_29.1760	548	K	2.04407	8.79075e-05	Up	paraflagellar rod protein 1D, putative OS=Leishmania_mexicana_MHOM/GT/2001/U1103 GN=LmxM.08_29.1760	LmxM.08_29.1760	1	2.13906e-59	199.54	2	SHLTK(1)QEEVR	1.1171	1100500	1177500	1239000	524250	526810	373590	465310	511910	509180	858590	860710	885590	743170	822120	812930	259440	260690	266450	1.38591	1.51334	1.5478	0.860087	0.838081	0.596151	0.635691	0.711032	0.710122	1.42603	1.4743	1.49684	0.847173	0.942554	0.939028	0.548407	0.574161	0.56508
LmxM.08_29.1760	372	K	4.55007	4.26715e-07	Up	paraflagellar rod protein 1D, putative OS=Leishmania_mexicana_MHOM/GT/2001/U1103 GN=LmxM.08_29.1760	LmxM.08_29.1760	1	2.88645e-84	178.52	2	VENAQFLEVAAQHK(1)K	-2.9097	300970	285360	289100	42135	44705	45810	65456	65558	66487	144350	150970	150900	60844	50041	60038	0	21660	27219	2.33298	2.2574	2.22297	0.42549	0.437754	0.449949	0.550421	0.560484	0.570743	1.47571	1.5917	1.5699	0.426917	0.353134	0.426868		0.293636	0.355311
LmxM.08_29.1760	409	K	6.93149	4.43204e-08	Up	paraflagellar rod protein 1D, putative OS=Leishmania_mexicana_MHOM/GT/2001/U1103 GN=LmxM.08_29.1760	LmxM.08_29.1760	1	2.23167e-81	253.1	2	YDK(1)TNQDLAALR	0.46838	2572400	2452600	2505000	318200	313980	302210	285860	307640	305130	1012800	1037300	1050300	420580	377220	405890	149500	149840	167550	2.79575	2.72029	2.70064	0.450524	0.431071	0.416183	0.337032	0.368767	0.367249	1.45171	1.53337	1.53204	0.413759	0.373233	0.404621	0.272723	0.284807	0.306657
LmxM.08_29.1800	43	K	12.372	6.0817e-07	Up	40S ribosomal protein S15A, putative OS=Leishmania_mexicana_MHOM/GT/2001/U1103 GN=LmxM.08_29.1800	LmxM.08_29.1800	1	3.40925e-166	274.89	3	FLQVMQK(1)HGYIGEFEIIDDHR	0.1244	3855200	3872700	3829700	497590	411980	341110	249950	212590	276440	1335300	2079700	1874700	449740	422310	388900	264790	295950	272790	3.39996	3.23694	3.13844	0.381537	0.30248	0.247862	0.21955	0.187795	0.241013	1.00995	1.60482	1.40472	0.393154	0.358851	0.330241	0.343367	0.337986	0.33138
LmxM.08_29.1800	32	K	6.73437	0.000315873	Up	40S ribosomal protein S15A, putative OS=Leishmania_mexicana_MHOM/GT/2001/U1103 GN=LmxM.08_29.1800	LmxM.08_29.1800	1	1.01358e-09	108.4	2	QVLIRPSSK(1)VVVK	-0.99996	167570	135600	154650	25375	0	26064	0	0	0	116670	121210	121260	0	0	24933	0	0	0	1.73133	1.32781	1.48475	0.227944		0.221877				1.0338	1.09577	1.06446			0.248042
LmxM.08_29.1800	91	K	7.79198	1.22941e-06	Up	40S ribosomal protein S15A, putative OS=Leishmania_mexicana_MHOM/GT/2001/U1103 GN=LmxM.08_29.1800	LmxM.08_29.1800	1	0.00049176	119.07	2	WMK(1)NILPSR	-0.2285	540380	518330	508050	0	92375	90383	58147	51142	61832	838340	871280	849930	78144	0	0	0	0	0	1.45891	1.32626	1.27455		0.207624	0.20105	0.156354	0.138299	0.165027	1.94108	2.05819	1.94958	0.209122
LmxM.08_29.1830	89	K	3.06657	1.31146e-05	Up	dihydrolipoamide dehydrogenase, putative OS=Leishmania_mexicana_MHOM/GT/2001/U1103 GN=LmxM.08_29.1830	LmxM.08_29.1830	1	0.00120845	114.64	2	IK(1)HSNLIK	-1.2422	97760	83201	87656	30781	32010	32787	38905	0	32148	54536	57948	0	41350	38533	42143	30496	0	0	2.15249	1.7201	1.91476	0.563198	0.587375	0.594808	0.76759		0.632427	1.25151	1.29353		0.856764	0.836918	0.89557	0.53739
LmxM.08_29.1870	85	K	49.8105	6.03563e-06	Up	hypothetical protein, conserved OS=Leishmania_mexicana_MHOM/GT/2001/U1103 GN=LmxM.08_29.1870	LmxM.08_29.1870	1	2.26742e-152	236.82	4	HPNQTFNEDDFEDLHEK(1)HGGTTR	1.7038	697100	814640	779820	18462	23835	16409	0	0	0	403440	437730	439450	15595	18352	21424	0	8128.8	0	2.55452	3.09946	2.83505	0.0543996	0.0689279	0.0470992				1.43372	1.6142	1.56198	0.0558948	0.0646907	0.0754523		0.0282481
LmxM.08_29.1870	59	K	7.71892	0.000163851	Up	hypothetical protein, conserved OS=Leishmania_mexicana_MHOM/GT/2001/U1103 GN=LmxM.08_29.1870	LmxM.08_29.1870	1	3.47263e-17	134.2	2	VCMAQAPDLK(1)SMR	3.488	342010	324080	336920	69685	0	0	37411	30074	0	235980	231800	228080	27791	19680	28010	0	0	0	2.23591	2.19975	2.18522	0.366317			0.273697	0.217733		1.4961	1.52499	1.44629	0.177702	0.123761	0.175989
LmxM.08_29.1960	161	K	4.55961	5.12245e-10	Up	fumarate hydratase, putative OS=Leishmania_mexicana_MHOM/GT/2001/U1103 GN=LmxM.08_29.1960	LmxM.08_29.1960	1	5.95164e-16	163.43	2	YLSK(1)GIWNAYR	0.022224	157020	155830	166470	38369	39522	38184	34916	31905	35228	129960	135270	127160	61701	59263	61165	31605	0	34360	2.00008	1.93704	2.06094	0.432024	0.446811	0.414303	0.446688	0.4172	0.473933	1.66182	1.80509	1.61916	0.829415	0.778593	0.783742	0.441753		0.470404
LmxM.08_29.1960	120	K	8.53853	8.87729e-05	Up	fumarate hydratase, putative OS=Leishmania_mexicana_MHOM/GT/2001/U1103 GN=LmxM.08_29.1960	LmxM.08_29.1960	1	1.36147e-137	236.23	2	YVATTLLK(1)NACIAAGR	0.78645	704420	687950	679760	125690	0	111320	93593	46076	47599	560530	618260	574010	241770	219190	239200	97693	104570	109590	2.28177	2.17466	2.14009	0.359894		0.307154	0.304487	0.153217	0.162844	1.82272	2.09804	1.85869	0.826472	0.732308	0.779431	0.347243	0.360878	0.381535
LmxM.08_29.1980	112	K	4.83177	0.000488322	Up	hypothetical protein, conserved OS=Leishmania_mexicana_MHOM/GT/2001/U1103 GN=LmxM.08_29.1980	LmxM.08_29.1980	1	0.000401938	81.099	2	SK(1)ADFLALAR	-1.5261	97331	102270	98968	0	18747	0	23480	0	28009	54532	55093	56635	23382	24520	21446	0	0	11045	2.23096	2.39917	2.17817		0.351085		0.465437		0.592546	1.27426	1.33609	1.39795	0.501027	0.497945	0.478003			0.225528
LmxM.08_29.2100	36	K	4.72192	1.86294e-07	Up	Present in the outer mitochondrial membrane proteome 37 OS=Leishmania_mexicana_MHOM/GT/2001/U1103 GN=LmxM.08_29.2100	LmxM.08_29.2100	1	1.4863e-11	129.28	2	ATIYQNK(1)SLQR	-1.9584	357590	322700	343760	81706	75822	78685	67804	72495	80115	197650	205890	198710	0	0	88442	0	0	0	2.33744	2.03506	2.17758	0.528438	0.485533	0.507276	0.385668	0.414116	0.453301	1.29002	1.35204	1.32633			0.536735
LmxM.08_29.2100	531	K	11.8784	9.98978e-11	Up	Present in the outer mitochondrial membrane proteome 37 OS=Leishmania_mexicana_MHOM/GT/2001/U1103 GN=LmxM.08_29.2100	LmxM.08_29.2100	1	0.00435227	92.677	2	VK(1)TYAYR	1.3219	433450	406930	389330	31343	34773	32791	40873	40329	39721	205700	214230	210230	38975	35271	35559	23007	19809	23298	3.77651	3.42055	3.28726	0.270195	0.296799	0.281776	0.309879	0.307064	0.299564	1.78949	1.87513	1.87035	0.309585	0.281858	0.287639	0.160875	0.131873	0.156788
LmxM.08_29.2160	437	K	3.13786	0.000188244	Up	rab-GDP dissociation inhibitor, putative OS=Leishmania_mexicana_MHOM/GT/2001/U1103 GN=LmxM.08_29.2160	LmxM.08_29.2160	1	2.18241e-08	103.69	2	PYSFDAIK(1)R	-1.9752	193600	177590	167320	49266	0	46028	0	0	0	0	128150	126560	50532	50182	0	41369	43243	43642	2.08359	1.91677	1.84314	0.636626		0.604879					1.40532	1.36505	0.572739	0.5619		0.340425	0.345877	0.352454
LmxM.08_29.2240	116	K	6.56195	5.78038e-05	Up	Aminopeptidase M1, putative OS=Leishmania_mexicana_MHOM/GT/2001/U1103 GN=LmxM.08_29.2240	LmxM.08_29.2240	1	6.30405e-06	103.87	2	GFYQVSFK(1)HGGK	1.7085	231360	276560	294370	0	42326	42559	0	0	47205	0	143500	121980	0	36380	0	0	0	0	1.77238	2.1217	2.24944		0.286327	0.287915			0.361992		1.08713	0.884282		0.277232
LmxM.08_29.2240	855	K	11.0929	0.0265769	Up	Aminopeptidase M1, putative OS=Leishmania_mexicana_MHOM/GT/2001/U1103 GN=LmxM.08_29.2240	LmxM.08_29.2240	1	0.00204521	88.921	2	SWLNK(1)TWK	-1.2097	361640	360220	357890	0	33012	0	0	0	35681	239550	242980	248920	0	0	0	0	0	0	1.61943	1.6154	1.59863		0.13054				0.159943	1.01679	1.07601	1.05482
LmxM.08_29.2310	78	K	4.48243	0.00017179	Up	enoyl-CoA hydratase/isomerase-like protein OS=Leishmania_mexicana_MHOM/GT/2001/U1103 GN=LmxM.08_29.2310	LmxM.08_29.2310	1	3.63052e-08	92.428	2	AFVAGADIK(1)SMK	1.2212	213310	207290	216050	0	30931	31213	65590	60775	0	0	0	127090	77946	68993	71716	41339	44912	0	2.04931	2.06869	2.13666		0.407664	0.410513	0.546041	0.496276				1.3989	0.806493	0.718858	0.774851	0.432316	0.47252
LmxM.08_29.2340	102	K	14.5057	2.43797e-07	Up	nucleosome assembly protein (NAP), putative OS=Leishmania_mexicana_MHOM/GT/2001/U1103 GN=LmxM.08_29.2340	LmxM.08_29.2340	1	0.000468874	113.14	2	K(1)IIFTFR	0.42989	158540	154970	150300	9262.8	0	7508.8	8524	0	9418.3	118160	121290	127040	7341.9	10102	10578	0	0	5096.7	2.14661	2.14376	2.01752	0.166319		0.133266	0.129312		0.150913	1.80229	1.84425	1.91896	0.12113	0.172253	0.178648			0.0774183
LmxM.08_29.2440	586	K	9.93634	2.57307e-07	Up	3'5'-cyclic nucleotide phosphodiesterase, putative OS=Leishmania_mexicana_MHOM/GT/2001/U1103 GN=LmxM.08_29.2440	LmxM.08_29.2440	1	0.00110841	104.76	2	IFK(1)NFQVR	-0.2201	285340	267600	277320	0	35884	36874	25020	25932	24921	112400	122790	124170	29408	22814	0	17105	0	0	2.893	2.59028	2.72544		0.326525	0.315085	0.243024	0.249145	0.243104	1.18983	1.31174	1.33189	0.309782	0.235099		0.178818
LmxM.08_29.2460	191	K	4.16196	0.000556626	Up	60S ribosomal protein L13, putative OS=Leishmania_mexicana_MHOM/GT/2001/U1103 GN=LmxM.08_29.2460	LmxM.08_29.2460	1	9.4093e-05	126.82	2	SMCVYAFLK(1)K(1)NHSAVR	1.6292	181090	170290	188370	0	53772	0	0	0	28067	221760	232520	223610	0	0	0	0	0	0	1.03003	0.987427	1.10569		0.22331				0.276959	1.06726	1.14256	1.08155
LmxM.08_29.2460	14	K	9.95266	0.000183433	Up	60S ribosomal protein L13, putative OS=Leishmania_mexicana_MHOM/GT/2001/U1103 GN=LmxM.08_29.2460	LmxM.08_29.2460	1	9.72648e-28	146.88	2	GNNAIPHVHQK(1)K	-2.6218	119330	139280	150680	0	19078	20524	0	0	0	0	144280	0	0	0	0	0	0	0	1.1152	1.32695	1.4532		0.130177	0.130749					1.16486
LmxM.08_29.2460	15	K	15.0004	5.48661e-07	Up	60S ribosomal protein L13, putative OS=Leishmania_mexicana_MHOM/GT/2001/U1103 GN=LmxM.08_29.2460	LmxM.08_29.2460	1	4.21345e-26	195.58	2	K(1)HWNPCSSQK	2.0068	708090	741650	733790	69751	65020	69052	0	0	0	682040	689280	710410	69994	0	73417	0	0	0	1.5602	1.66591	1.66851	0.117985	0.104601	0.103714				1.27154	1.31205	1.33107	0.183106		0.181392
LmxM.08_29.2460	37	K	5.19959	6.16311e-05	Up	60S ribosomal protein L13, putative OS=Leishmania_mexicana_MHOM/GT/2001/U1103 GN=LmxM.08_29.2460	LmxM.08_29.2460	1	9.9583e-22	150.24	2	VFLNQPAQK(1)HR	0.43882	294340	232710	232580	71209	68018	64645	0	0	0	266900	290420	287360	27613	24671	25994	0	0	0	1.72989	1.39426	1.41061	0.321284	0.291869	0.258985				1.32723	1.47454	1.43613	0.192678	0.161452	0.171306
LmxM.08_29.2460	109	K	14.5212	1.58105e-06	Up	60S ribosomal protein L13, putative OS=Leishmania_mexicana_MHOM/GT/2001/U1103 GN=LmxM.08_29.2460	LmxM.08_29.2460	1	2.3447e-247	337.02	2	NK(1)SEEGMNVNVQR	-0.16181	3154500	2973500	2933800	228150	222760	219170	157000	159790	164010	1857700	1867800	1859600	180460	167960	171350	72185	72813	78868	3.1715	3.04764	3.0439	0.176092	0.163519	0.150206	0.244003	0.255907	0.286068	1.5803	1.62228	1.58984	0.21541	0.18803	0.193174	0.146247	0.139347	0.15215
LmxM.08_29.2460	122	K	48.8138	4.46776e-08	Up	60S ribosomal protein L13, putative OS=Leishmania_mexicana_MHOM/GT/2001/U1103 GN=LmxM.08_29.2460	LmxM.08_29.2460	1	1.42299e-11	126.17	3	LK(1)TYMSK(1)LVLFPMNHK	-4.0909	1789500	1610200	1551500	45742	54383	0	21372	15614	22527	1266100	1211000	1252100	41499	40661	44310	11938	0	0	2.76221	2.53376	2.47139	0.0542032	0.0612892		0.0509954	0.0383917	0.0603242	1.65357	1.61484	1.64348	0.0760524	0.069886	0.0766933	0.0371331
LmxM.08_29.2460	127	K	9.91515	1.40427e-08	Up	60S ribosomal protein L13, putative OS=Leishmania_mexicana_MHOM/GT/2001/U1103 GN=LmxM.08_29.2460	LmxM.08_29.2460	1	2.8885e-89	244.74	2	TYMSK(1)LVLFPMNHK	0.62099	1187300	1261900	1309000	173050	209010	201240	72965	68643	73029	1259200	1226300	1198400	144130	136510	145260	0	0	0	1.89876	2.05729	2.16031	0.212455	0.244047	0.219379	0.180379	0.174866	0.202614	1.70386	1.69422	1.62972	0.273663	0.243087	0.260488
LmxM.08_29.2460	136	K	14.8994	2.1677e-07	Up	60S ribosomal protein L13, putative OS=Leishmania_mexicana_MHOM/GT/2001/U1103 GN=LmxM.08_29.2460	LmxM.08_29.2460	1	1.82305e-08	109.36	2	LVLFPMNHK(1)K	0.87494	1301700	1172800	1181200	136570	136290	138400	40246	42763	40245	892470	831940	850110	98322	88045	94480	20229	18280	20923	3.04686	2.79851	2.85319	0.245405	0.232918	0.220825	0.145622	0.159444	0.163425	1.76753	1.68227	1.69207	0.27324	0.229474	0.247978	0.0954161	0.0814467	0.0939727
LmxM.08_29.2570	150	K	3.18823	8.67665e-07	Up	serine/threonine-protein kinase, putative OS=Leishmania_mexicana_MHOM/GT/2001/U1103 GN=LmxM.08_29.2570	LmxM.08_29.2570	1	2.60726e-08	114.93	2	DLK(1)TANIFLTSK	-2.0709	250180	252920	239070	91901	105450	119220	78940	80805	75299	129900	144780	0	0	51281	0	0	0	0	2.04993	2.04287	1.93275	0.625393	0.68189	0.755103	0.557131	0.603715	0.556644	1.01239	1.12895			0.421452
LmxM.08_29.2570	159	K	3.1861	0.000111751	Up	serine/threonine-protein kinase, putative OS=Leishmania_mexicana_MHOM/GT/2001/U1103 GN=LmxM.08_29.2570	LmxM.08_29.2570	1	6.13682e-06	90.689	2	TANIFLTSK(1)NVVK	-1.8233	98559	101090	110020	42763	41597	36143	0	0	0	52831	67518	82206	36407	34970	36075	0	0	0	1.76723	1.7868	1.9464	0.636812	0.588627	0.500946				0.901023	1.15211	1.39835	0.663855	0.628922	0.662877
LmxM.08_29.2570	493	K	4.23787	5.23568e-05	Up	serine/threonine-protein kinase, putative OS=Leishmania_mexicana_MHOM/GT/2001/U1103 GN=LmxM.08_29.2570	LmxM.08_29.2570	1	9.66194e-17	118.87	3	FAHNSNAITK(1)LAVWEGK	-1.0806	133050	130740	119330	40705	33663	0	0	32042	0	0	104060	96195	20632	22491	30859	12913	0	19725	2.40202	2.32671	2.12557	0.610317	0.479618			0.527459			1.78782	1.64751	0.378787	0.407263	0.570917	0.193554		0.298527
LmxM.08_29.2800	313	K	6.25698	6.24246e-06	Up	inosine-adenosine-guanosine-nucleosidehydrolase, putative OS=Leishmania_mexicana_MHOM/GT/2001/U1103 GN=LmxM.08_29.2800	LmxM.08_29.2800	1	2.19218e-93	192.68	2	AAEGAATGNIYVAK(1)NTK	-2.7281	215330	200100	212550	57932	40372	45298	25504	0	36080	137420	158700	162280	51945	52109	52880	32526	36129	42384	2.50533	2.42189	2.59183	0.519295	0.359251	0.411406	0.293959		0.418929	1.44372	1.8159	1.81978	0.579275	0.596876	0.605376	0.358836	0.396558	0.469051
LmxM.08_29.2800	316	K	5.16659	1.98983e-06	Up	inosine-adenosine-guanosine-nucleosidehydrolase, putative OS=Leishmania_mexicana_MHOM/GT/2001/U1103 GN=LmxM.08_29.2800	LmxM.08_29.2800	1	2.37305e-07	138.26	2	NTK(1)ADMFYR	1.3149	443110	458590	451090	122960	0	115340	0	0	85010	268630	282010	271370	84826	0	80278	55616	0	52656	2.21845	2.38842	2.36693	0.474283		0.450764			0.424738	1.21441	1.38854	1.30946	0.40705		0.395465	0.264024		0.250752
LmxM.08_29.2800	71	K	4.40312	0.000487173	Up	inosine-adenosine-guanosine-nucleosidehydrolase, putative OS=Leishmania_mexicana_MHOM/GT/2001/U1103 GN=LmxM.08_29.2800	LmxM.08_29.2800	1	9.23802e-15	130.78	2	ATGLFPVAK(1)TSFK	-1.6648	205120	189270	217950	0	72197	66985	0	0	35746	140130	133750	139940	48045	0	46767	30693	30447	0	2.09733	2.0132	2.33561		0.564592	0.534647			0.364753	1.29378	1.34495	1.37909	0.470855		0.470513	0.29758	0.293693
LmxM.08_29.2830	185	K	10.7864	0.000970792	Up	RNA recognition motif. (a.k.a. RRM, RBD, or RNP domain), putative OS=Leishmania_mexicana_MHOM/GT/2001/U1103 GN=LmxM.08_29.2830	LmxM.08_29.2830	1	1.94594e-125	196.04	3	LK(1)VGYSTNPLNIISSASSNQYPAGQVK	-0.34468	88055	130790	118130	0	26843	31219	0	0	0	83347	101730	108260	0	0	0	0	0	0	1.52688	2.41143	1.97254		0.167877	0.197449				1.09548	1.20362	1.35775
LmxM.08_29.2860	90	K	6.86469	6.92824e-09	Up	40S ribosomal protein S19-like protein OS=Leishmania_mexicana_MHOM/GT/2001/U1103 GN=LmxM.08_29.2860	LmxM.08_29.2860	1	6.56393e-54	151.08	2	PGVGYGGLSK(1)R	6.1649	1487200	1343300	1201400	175420	181880	177270	144960	149940	148600	862490	860540	788350	178870	189060	192440	96770	102670	109610	2.87485	2.48869	2.18682	0.353048	0.395172	0.369743	0.344388	0.36164	0.375775	1.52894	1.56543	1.42337	0.370305	0.417568	0.428504	0.261905	0.294242	0.317009
LmxM.08_29.2860	51	K	1.8025	1.21013e-06	Up	40S ribosomal protein S19-like protein OS=Leishmania_mexicana_MHOM/GT/2001/U1103 GN=LmxM.08_29.2860	LmxM.08_29.2860	1	5.80464e-23	187.51	3	IFVPNCTEIMK(1)SSHGR	1.2062	979100	978120	928180	477320	502470	490770	398950	399060	395070	824670	839120	843520	378400	386160	396450	189860	188470	199920	1.62122	1.55225	1.4472	0.822877	0.93515	0.876824	0.811873	0.824456	0.855762	1.25224	1.30755	1.30456	0.671033	0.730575	0.756168	0.440156	0.462672	0.495276
LmxM.08_29.2860	122	K	5.38509	1.11856e-09	Up	40S ribosomal protein S19-like protein OS=Leishmania_mexicana_MHOM/GT/2001/U1103 GN=LmxM.08_29.2860	LmxM.08_29.2860	1	1.0581e-93	197.17	2	SLTK(1)LGLVEPGAQSGQR	-0.31341	1841700	1667500	1701500	298490	294600	292370	244270	236050	245000	1272700	1314400	1276500	351250	317610	342170	178250	180900	196940	2.4381	2.11569	2.12102	0.411408	0.43835	0.417623	0.397427	0.389898	0.42429	1.54508	1.63749	1.57836	0.497997	0.480407	0.521782	0.330385	0.355048	0.39007
LmxM.09.0210	205	K	17.0314	4.51161e-07	Up	Domain of unknown function (DUF4586), putative OS=Leishmania_mexicana_MHOM/GT/2001/U1103 GN=LmxM.09.0210	LmxM.09.0210	1	1.13469e-33	153.52	2	SGGCFDETK(1)HGVSR	0.40401	252790	251950	258600	16704	16739	19270	0	0	0	164730	172770	175700	0	11611	12974	0	0	0	1.87921	1.95964	2.07299	0.112863	0.109931	0.124321				1.42838	1.46709	1.51027		0.0910807	0.104948
LmxM.09.0220	376	K	3.37046	0.0247302	Up	hypothetical protein, conserved OS=Leishmania_mexicana_MHOM/GT/2001/U1103 GN=LmxM.09.0220	LmxM.09.0220	0.999647	9.0942e-17	98.895	3	SLSTEILSK(1)IHAYDLKPVLR	0.64014	89301	65776	78256	8879	0	17709	23739	0	42332	20377	35487	22930	0	11492	0	0	0	0	2.37575	1.75854	2.01943	0.206853		0.403919	0.650376		1.17323	0.539295	0.943538	0.619747		0.282048
LmxM.09.0220	559	K	3.98458	0.000139069	Up	hypothetical protein, conserved OS=Leishmania_mexicana_MHOM/GT/2001/U1103 GN=LmxM.09.0220	LmxM.09.0220	1	0.000640827	100.84	2	TDYAK(1)IYQR	2.0843	148610	137890	141560	38119	42980	0	0	0	0	0	0	90217	0	0	33252	0	0	0	1.65552	1.54368	1.52965	0.37186	0.419332							1.02103			0.340747
LmxM.09.0520	62	K	7.8094	5.65339e-09	Up	Flagellum attachment zone protein 3 OS=Leishmania_mexicana_MHOM/GT/2001/U1103 GN=LmxM.09.0520	LmxM.09.0520	1	2.03034e-62	220.17	2	EAFK(1)NVDVQQR	-1.4642	481310	482570	476530	46277	43761	55288	46714	50051	45241	266560	261420	274170	42175	50172	50945	43211	51872	52895	2.92377	2.90859	2.94105	0.386239	0.348984	0.449283	0.348994	0.373562	0.33982	1.6518	1.5875	1.70406	0.265567	0.316947	0.322608	0.216497	0.258204	0.268622
LmxM.09.0520	389	K	5.5825	1.52411e-05	Up	Flagellum attachment zone protein 3 OS=Leishmania_mexicana_MHOM/GT/2001/U1103 GN=LmxM.09.0520	LmxM.09.0520	1	5.96152e-68	141.87	2	FWAPQK(1)SNYVPSLTSNR	0.20692	385610	391010	375380	63145	47883	51538	46582	0	0	262720	257020	254440	82870	64212	72987	0	30643	43468	2.2667	2.28054	2.24188	0.509986	0.369511	0.40527	0.336758			1.57537	1.51033	1.53031	0.504947	0.392528	0.447247		0.147601	0.213611
LmxM.09.0720	63	K	5.22683	0.000123961	Up	cleavage and polyadenylation specificity factor 30 kDa subunit, putative OS=Leishmania_mexicana_MHOM/GT/2001/U1103 GN=LmxM.09.0720	LmxM.09.0720	1	0.00367089	96.51	2	VCK(1)HWLR	2.3197	118440	107210	114650	0	0	16688	21853	21404	0	58871	58994	60238	0	0	0	0	0	0	1.86855	1.59321	1.75185			0.270161	0.382308	0.345002		0.910019	0.875671	0.929002
LmxM.09.0770	719	K	6.07613	6.8918e-09	Up	oligopeptidase b OS=Leishmania_mexicana_MHOM/GT/2001/U1103 GN=LmxM.09.0770	LmxM.09.0770	1	5.83495e-51	160.62	2	ESAVQQAFVCK(1)HLK	-1.1891	738110	676060	668810	136240	129850	132620	107000	102070	101420	363550	379770	394260	110830	95135	107920	133930	139720	151970	3.37752	3.16381	3.02951	0.576034	0.559602	0.584417	0.485147	0.473058	0.472053	1.44982	1.53051	1.6539	0.494864	0.43631	0.500551	0.313129	0.334419	0.354045
LmxM.09.0770	121	K	1.953	8.96597e-05	Up	oligopeptidase b OS=Leishmania_mexicana_MHOM/GT/2001/U1103 GN=LmxM.09.0770	LmxM.09.0770	1	0.00337484	76.833	2	SYK(1)IYCR	1.6707	92440	80608	0	46808	41719	44666	44525	47857	49633	64194	67149	66322	32558	33312	31361	30069	30960	0	2.18313	1.94691		1.02142	0.927926	1.01586	1.04192	1.14473	1.19228	1.32126	1.39668	1.43591	0.750289	0.788493	0.75072	0.362833	0.38245
LmxM.09.0840	133	K	7.21547	4.26803e-09	Up	Uncharacterised protein family (UPF0160), putative OS=Leishmania_mexicana_MHOM/GT/2001/U1103 GN=LmxM.09.0840	LmxM.09.0840	1	9.18244e-46	179.31	2	LSSAGLVYK(1)HFGR	0.75734	541270	527130	569240	63357	65182	63464	57490	57991	57615	269150	271640	277930	85188	80158	85999	66573	61357	73010	2.69623	2.84598	2.94258	0.402671	0.438381	0.428116	0.360113	0.364431	0.358124	1.32336	1.4706	1.48357	0.485184	0.475707	0.520757	0.301997	0.272775	0.316932
LmxM.09.0910	22	K	7.62507	0.0338595	Up	calmodulin, putative OS=Leishmania_mexicana_MHOM/GT/2001/U1103 GN=LmxM.09.0910	LmxM.09.0910	1	1.10416e-107	223.03	2	EAFSLFDK(1)DGDGTITTK	0.39399	2655100	2612400	2473100	0	0	0	246530	318020	0	1733900	1865200	1724500	268040	269840	260330	365120	385390	365130	2.23689	2.17766	2.04065				0.245173	0.319211		1.41864	1.48833	1.37854	0.271798	0.276717	0.268963	0.212855	0.221206	0.208857
LmxM.09.0970	266	K	2.26097	4.51177e-05	Up	elongation factor-1 gamma OS=Leishmania_mexicana_MHOM/GT/2001/U1103 GN=LmxM.09.0970	LmxM.09.0970	1	6.62172e-13	108.41	3	KPNPLDALPPSSFVLDAYK(1)R	-0.5142	161830	170310	178460	65171	66684	65862	55037	0	0	86950	113950	103460	0	53300	40897	36385	0	29776	1.68826	1.86834	1.88277	0.802246	0.860517	0.843968	0.700969			0.84463	1.11943	1.01561		0.628218	0.472884	0.433467		0.341082
LmxM.09.0970	199	K	3.79849	1.0969e-08	Up	elongation factor-1 gamma OS=Leishmania_mexicana_MHOM/GT/2001/U1103 GN=LmxM.09.0970	LmxM.09.0970	1	9.3989e-176	227.95	2	LYNTVMQQPK(1)TVEVLK	-3.8441	1810600	1725400	1756400	395560	416680	416110	346940	391440	371770	1396600	1430200	1402900	506320	482310	516940	341480	349890	374400	2.06656	2.07085	2.02733	0.532732	0.58828	0.583368	0.483439	0.53632	0.521752	1.48427	1.53718	1.50669	0.618084	0.621946	0.653954	0.445085	0.448955	0.469215
LmxM.09.0970	175	K	3.84243	1.27673e-05	Up	elongation factor-1 gamma OS=Leishmania_mexicana_MHOM/GT/2001/U1103 GN=LmxM.09.0970	LmxM.09.0970	1	4.10905e-09	139.78	2	MNVK(1)HGEELAR	-0.32879	263750	196170	206010	46366	45338	0	0	52585	50000	129470	127140	126130	49458	50553	52479	31099	28004	32161	2.59754	2.03159	2.0518	0.538817	0.552317			0.621678	0.605487	1.18728	1.17911	1.16886	0.520959	0.562495	0.572846	0.349759	0.310053	0.347785
LmxM.09.0970	215	K	2.07826	0.0115442	Up	elongation factor-1 gamma OS=Leishmania_mexicana_MHOM/GT/2001/U1103 GN=LmxM.09.0970	LmxM.09.0970	1	1.13386e-09	130.79	2	QWGATFGPAK(1)APK	0.24387	179270	226410	0	0	82429	89334	0	74587	0	0	0	0	126180	114150	112600	67772	81375	0	1.42147	1.88782			0.808476	0.870077		0.70995					1.07009	1.02261	0.989581	0.613669	0.725385
LmxM.09.1010	437	K	16.5222	0.000505591	Up	Present in the outer mitochondrial membrane proteome 10 OS=Leishmania_mexicana_MHOM/GT/2001/U1103 GN=LmxM.09.1010	LmxM.09.1010	1	5.24444e-06	106.47	2	AVK(1)SVTPSTEPPKPK	-2.4704	0	583480	613170	57728	54944	41248	17300	0	19593	435230	487660	484040	30239	26477	27725	23852	18866	0		2.95329	3.12806	0.270018	0.25932	0.187474	0.0949733		0.108394	2.15509	2.35905	2.35468	0.165737	0.145324	0.153833	0.126581	0.0971266
LmxM.09.1010	405	K	4.05455	0.000511799	Up	Present in the outer mitochondrial membrane proteome 10 OS=Leishmania_mexicana_MHOM/GT/2001/U1103 GN=LmxM.09.1010	LmxM.09.1010	1	2.94532e-07	76.563	2	TVDGVTICSAFDGTQEK(1)K	3.1893	122210	114220	139410	35745	0	0	0	0	27259	0	106870	98309	45343	41572	27684	0	0	0	1.65521	1.48429	1.82594	0.429258					0.38718		1.32731	1.22784	0.638058	0.585821	0.394369
LmxM.09.1050	87	K	2.74431	2.50938e-05	Up	MSP (Major sperm protein) domain containing protein, putative OS=Leishmania_mexicana_MHOM/GT/2001/U1103 GN=LmxM.09.1050	LmxM.09.1050	1	0.0054056	73.637	2	YTK(1)DTFR	0.56055	181080	176130	173560	51446	52861	49122	81414	75093	82367	120240	124930	126820	62079	58903	60878	0	0	0	1.88209	1.79718	1.81328	0.596486	0.570859	0.533294	0.752438	0.686103	0.863682	1.31591	1.44589	1.46395	0.657469	0.63372	0.647995
LmxM.09.1050	52	K	3.23551	7.41743e-06	Up	MSP (Major sperm protein) domain containing protein, putative OS=Leishmania_mexicana_MHOM/GT/2001/U1103 GN=LmxM.09.1050	LmxM.09.1050	1	0.00373476	101.41	2	YYLK(1)HSK	0.19482	663300	602670	661480	199340	214280	210350	167680	198500	196680	411940	432940	444860	242900	225010	223160	84522	96237	92729	2.27593	2.0301	2.28145	0.762997	0.763933	0.753899	0.511603	0.598729	0.680833	1.4883	1.65415	1.69529	0.849254	0.799175	0.784165	0.235534	0.289517	0.245929
LmxM.09.1070	73	K	6.36751	2.33567e-07	Up	eukaryotic translation initiation factor 2 subunit, putative OS=Leishmania_mexicana_MHOM/GT/2001/U1103 GN=LmxM.09.1070	LmxM.09.1070	1	0.000634705	118.06	2	ALSGVK(1)TQK(1)FHR	-0.3099	579680	541500	560070	0	95807	0	67398	72280	68423	364800	378610	382410	82897	79591	81110	0	0	0	2.17069	2.04871	2.09921		0.362504		0.300371	0.337034	0.323187	1.15288	1.20914	1.26438	0.334777	0.332116	0.329765
LmxM.09.1070	62	K	10.08	3.48641e-07	Up	eukaryotic translation initiation factor 2 subunit, putative OS=Leishmania_mexicana_MHOM/GT/2001/U1103 GN=LmxM.09.1070	LmxM.09.1070	1	3.81973e-126	197.79	3	QATINVGTIGHVAHGK(1)STVVK	0.97725	969390	790230	765240	89552	88998	91415	57892	60842	0	555980	482630	485410	84475	97230	99673	68316	83500	0	3.07698	2.53427	2.43124	0.282991	0.285438	0.302178	0.218699	0.240478		1.48938	1.30651	1.36043	0.289175	0.343908	0.343498	0.231837	0.285723
LmxM.09.1320	555	K	5.84007	0.000111161	Up	paraflagellar rod component, putative OS=Leishmania_mexicana_MHOM/GT/2001/U1103 GN=LmxM.09.1320	LmxM.09.1320	1	1.2116e-22	145.95	2	YVEGEEHEIFQK(1)K	-1.2293	80329	65260	58717	6915.2	0	0	9549.4	11844	11827	21455	21504	18367	4381.3	0	6934.2	0	0	0	2.73865	2.16532	1.92026	0.279962			0.367156	0.458013	0.452893	0.983703	0.928887	0.819151	0.155762		0.248116
LmxM.09.1340	100	K	1.85226	0.00915249	Up	histone H2B OS=Leishmania_mexicana_MHOM/GT/2001/U1103 GN=LmxM.09.1340	LmxM.09.1340	1	3.78179e-07	101.43	2	HAMAEGTK(1)AVSNASR	1.6892	30222	24670	0	0	0	10574	14589	13802	13997	22347	25693	34574	0	11833	0	13594	15357	17129	1.54678	1.39297				0.609794	0.88309	0.821065	0.860281	1.17262	1.38898	2.08088		0.687813		0.487392	0.593114	0.658095
LmxM.10.0180	194	K	4.40673	8.01389e-05	Up	leucine-rich repeat protein, putative OS=Leishmania_mexicana_MHOM/GT/2001/U1103 GN=LmxM.10.0180	LmxM.10.0180	1	0.000200118	98.009	2	NYK(1)VFVTFHR	0.21463	77024	70957	77278	0	0	14244	0	18305	0	44765	43091	0	20812	0	0	0	0	0	1.46802	1.45595	1.54567			0.318654		0.357531		1.15496	1.14034		0.434629
LmxM.10.0210	91	K	2.76069	8.42051e-07	Up	nucleolar protein 56, putative OS=Leishmania_mexicana_MHOM/GT/2001/U1103 GN=LmxM.10.0210	LmxM.10.0210	1	1.13803e-92	194.55	2	VAK(1)SEANWELGVQDPK	0.11651	467330	500730	501990	166600	173830	185410	144510	156580	158780	502920	509600	517540	275580	261280	267850	120520	126120	138460	1.52753	1.64152	1.68565	0.607513	0.630802	0.663527	0.504649	0.550254	0.560277	1.60045	1.63562	1.64005	0.903388	0.862901	0.879977	0.497124	0.513847	0.572538
LmxM.10.0210	321	K	3.01499	2.98556e-05	Up	nucleolar protein 56, putative OS=Leishmania_mexicana_MHOM/GT/2001/U1103 GN=LmxM.10.0210	LmxM.10.0210	1	1.20712e-21	162.23	2	LISK(1)AGSLTNLAK	-0.62449	938690	787270	764750	302650	306090	313550	200950	200090	201050	631080	588720	607140	412310	390190	426420	146210	127390	153940	2.11776	1.78138	1.77248	0.761747	0.766667	0.774501	0.484361	0.485335	0.489667	1.38617	1.30422	1.32798	0.932911	0.889448	0.966956	0.416267	0.35824	0.439361
LmxM.10.0210	429	K	4.04219	3.50157e-05	Up	nucleolar protein 56, putative OS=Leishmania_mexicana_MHOM/GT/2001/U1103 GN=LmxM.10.0210	LmxM.10.0210	0.998808	2.89162e-161	175.01	3	LNFFDTGNK(0.001)PPSNK(0.999)AAMAEALEQYQR	0.90031	367130	383490	391470	0	0	0	0	89563	87092	219060	248220	218640	75396	0	74619	0	0	0	1.60137	1.67766	1.7542					0.420014	0.410103	0.930279	1.06316	0.924596	0.329825		0.327142
LmxM.10.0290	228	K	8.14562	0.0305784	Up	isocitrate dehydrogenase [NADP] OS=Leishmania_mexicana_MHOM/GT/2001/U1103 GN=LmxM.10.0290	LmxM.10.0290	1	0.000238777	63.908	2	K(1)YPLVLTTK(1)NTILK	0.36201	172610	189780	185290	0	20716	0	0	25659	0	118970	0	0	27226	25320	27286	18110	0	0	2.19272	2.40276	2.31253		0.247496			0.317881		1.39701			0.345644	0.325043	0.352275	0.226134
LmxM.10.0290	236	K	16.1848	3.20322e-07	Up	isocitrate dehydrogenase [NADP] OS=Leishmania_mexicana_MHOM/GT/2001/U1103 GN=LmxM.10.0290	LmxM.10.0290	1	6.41054e-41	197.79	2	YPLVLTTK(1)NTILK	-0.41596	1363100	1257100	1156900	107990	102820	106690	53076	62978	59754	703780	865260	752820	187610	194920	217990	105040	96637	97618	3.37379	3.10101	2.81323	0.247695	0.239338	0.236162	0.127595	0.152015	0.144944	1.61017	2.00795	1.75439	0.464061	0.487536	0.548343	0.255549	0.249242	0.235748
LmxM.10.0290	33	K	2.9776	4.682e-09	Up	isocitrate dehydrogenase [NADP] OS=Leishmania_mexicana_MHOM/GT/2001/U1103 GN=LmxM.10.0290	LmxM.10.0290	1	1.15966e-70	203.76	2	VK(1)NEVVDMDGDEMTR	0.28682	896100	932370	895460	320030	315050	312980	315910	330070	321890	684850	712080	665600	289520	283690	273070	134240	126670	137010	2.09107	2.16842	2.05294	0.692065	0.69141	0.653168	0.716013	0.751148	0.736142	1.47724	1.55796	1.46241	0.675179	0.668985	0.647606	0.30791	0.308016	0.311955
LmxM.10.0390	497	K	37.3008	1.27638e-05	Up	GP63, leishmanolysin OS=Leishmania_mexicana_MHOM/GT/2001/U1103 GN=LmxM.10.0390	LmxM.10.0390	1	1.90428e-05	124.81	2	PK(1)TTHGLIK	0.060949	220190	211460	228670	0	0	13217	0	15814	17561	123920	133680	133950	17436	0	0	0	0	0	3.58301	3.5853	3.10455			0.0717171		0.0909606	0.112728	1.43512	1.48207	1.6109	0.215326
LmxM.10.0390	158	K	7.46006	0.000201732	Up	GP63, leishmanolysin OS=Leishmania_mexicana_MHOM/GT/2001/U1103 GN=LmxM.10.0390	LmxM.10.0390	1	1.10829e-05	88.24	3	RGILVK(1)HLVPQALQLHR	-12.328	45744	51055	35587	20651	19158	20915	0	9737.2	9984.6	21414	28029	22582	0	0	0	0	0	0	3.20756	3.73015	2.08195	0.543411	0.465126	0.489033		0.241344	0.276187	1.06865	1.33906	1.17025
LmxM.10.0470	497	K	4.23201	1.74213e-05	Up	GP63, leishmanolysin OS=Leishmania_mexicana_MHOM/GT/2001/U1103 GN=LmxM.10.0470	LmxM.10.0470	1	2.71838e-05	69.327	3	CIDGAFRPK(1)TTHGVIK	0.99385	303300	356520	344450	0	0	0	124420	128480	131740	158200	155380	157440	0	105540	0	0	0	0	1.44701	1.75017	1.65526				0.368408	0.385126	0.393069	0.780892	0.783183	0.790729		0.491577
LmxM.10.0470	504	K	5.47065	0.000942128	Up	GP63, leishmanolysin OS=Leishmania_mexicana_MHOM/GT/2001/U1103 GN=LmxM.10.0470	LmxM.10.0470	1	4.60191e-44	135.24	2	TTHGVIK(1)SYAALCANVK	-1.4587	325470	298540	273870	26514	26748	29310	188340	0	79219	123560	141090	142190	99588	105460	101750	15907	14827	0	2.45088	2.31319	2.07729	0.266532	0.276427	0.288006	0.880226		0.373073	0.962667	1.12248	1.12718	0.725843	0.77531	0.751004	0.383272	0.364071
LmxM.10.0470	158	K	6.03419	6.65476e-06	Up	GP63, leishmanolysin OS=Leishmania_mexicana_MHOM/GT/2001/U1103 GN=LmxM.10.0470	LmxM.10.0470	1	3.74988e-42	229.4	4	RDILVK(1)HLVPQALQLHR	-1.5835	1615200	2798200	2922700	365790	297720	262180	630050	712690	619720	990020	1648100	1334000	488480	416490	529530	125910	114460	101250	1.70683	3.04257	3.11093	0.51601	0.431767	0.361525	0.413218	0.473189	0.409556	1.08242	1.84	1.484	0.499615	0.42968	0.548468	0.425727	0.394402	0.347195
LmxM.10.0470	152	K	4.50519	2.25606e-07	Up	GP63, leishmanolysin OS=Leishmania_mexicana_MHOM/GT/2001/U1103 GN=LmxM.10.0470	LmxM.10.0470	1	1.10781e-210	248.5	2	FAVCTAEDILTDEK(1)R	0.70362	2083000	2067200	1876600	383530	380630	354130	649410	632270	657730	1161400	1373900	1206500	646470	578040	624100	136800	124820	183970	2.3252	2.37438	2.11001	0.571521	0.583111	0.515831	0.449915	0.443448	0.459168	1.34134	1.6203	1.41779	0.698463	0.629948	0.682843	0.488612	0.454335	0.666396
LmxM.10.0490	3	K	4.19203	1.30093e-05	Up	mitogen-activated protein kinase OS=Leishmania_mexicana_MHOM/GT/2001/U1103 GN=LmxM.10.0490	LmxM.10.0490	1	4.45751e-08	82.437	2	MHK(1)SNQELSVPK	0.36876	65702	67736	69748	0	27082	28018	16998	0	0	0	18257	0	0	12030	0	0	0	0	1.76217	1.82196	1.71893		0.434269	0.451317	0.379449				0.962081			0.311489
LmxM.10.0530	476	K	7.59404	0.0385752	Up	hypothetical protein, conserved OS=Leishmania_mexicana_MHOM/GT/2001/U1103 GN=LmxM.10.0530	LmxM.10.0530	1	6.40108e-09	132.39	2	LK(1)SEVAQLQR	-5.8677	265920	244770	242910	0	30396	0	24250	0	0	137550	144850	142760	30958	26393	0	0	0	0	1.84471	1.70813	1.73538		0.264416		0.199827			0.942503	1.02257	0.989806	0.222386	0.18529
LmxM.10.0780	89	K	2.14259	0.000309152	Up	WD domain, G-beta repeat, putative OS=Leishmania_mexicana_MHOM/GT/2001/U1103 GN=LmxM.10.0780	LmxM.10.0780	1	5.0405e-26	120.21	2	LIAGNNPNQTFTLFK(1)SLR	-0.50508	109860	112410	96370	0	0	42740	0	38748	40130	69314	61039	0	39890	0	29504	0	26866	0	1.56235	1.5991	1.36757			0.765917		0.66418	0.683714	1.11531	0.996812		0.640677		0.47727		0.482661
LmxM.16.0570	51	K	10.1213	4.62647e-09	Up	histone H3 OS=Leishmania_mexicana_MHOM/GT/2001/U1103 GN=LmxM.16.0570	LmxM.16.0570	1	0	364.42	2	K(1)FQK(1)STNLLIQCAPFQR	-0.77822	4195700	4254800	4190800	918780	949040	935630	730260	722790	726800	3606000	3638400	3322200	835340	787930	770220	759120	770640	761370	3.72121	3.34027	4.0662	0.401949	0.399129	0.388185	0.351613	0.332653	0.32534	2.47589	2.60073	2.43848	0.48705	0.493992	0.434757	0.348264	0.342711	0.352749
LmxM.16.0570	48	K	8.89677	0.000554144	Up	histone H3 OS=Leishmania_mexicana_MHOM/GT/2001/U1103 GN=LmxM.16.0570	LmxM.16.0570	1	9.76031e-55	210.4	2	K(1)FQK(1)STNLLIQCAPFQR	-0.77822	2581800	2378000	2392600	0	0	0	0	453590	618080	1978500	44695	43956	106140	0	0	443490	451000	0	4.00322	3.26378	4.05853					0.364964	0.483698	2.37492	0.0558535	0.0564051	0.108192			0.355704	0.350638
LmxM.16.0570	117	K	11.2214	1.35919e-07	Up	histone H3 OS=Leishmania_mexicana_MHOM/GT/2001/U1103 GN=LmxM.16.0570	LmxM.16.0570	1	8.49597e-06	110.44	2	VTIQPK(1)DIQLALR	-2.589	261500	229690	212860	49312	43731	45864	0	35132	37402	165790	197500	173680	28235	34144	35456	38823	0	48583	4.13848	3.21761	3.68532	0.384947	0.328176	0.339544		0.288517	0.298749	2.0312	2.51907	2.27474	0.293756	0.381976	0.357118	0.317817		0.401646
LmxM.10.0890	150	K	6.90588	5.7238e-09	Up	FKBP-type peptidyl-prolyl cis-trans isomerase, putative OS=Leishmania_mexicana_MHOM/GT/2001/U1103 GN=LmxM.10.0890	LmxM.10.0890	1	3.58341e-21	160.98	2	LEQALSK(1)TYADL	-0.28071	911740	798280	728580	112460	112520	106530	89847	89401	89864	614840	741670	641480	135860	128660	137530	90270	93075	91727	2.78262	2.14803	2.26477	0.36721	0.349308	0.322201	0.35074	0.340911	0.353484	1.60541	1.84164	1.82572	0.490102	0.469898	0.536376	0.270792	0.280056	0.260939
LmxM.10.0910	20	K	4.76654	2.15041e-05	Up	small GTP-binding protein Rab11, putative OS=Leishmania_mexicana_MHOM/GT/2001/U1103 GN=LmxM.10.0910	LmxM.10.0910	1	5.1465e-122	190.87	2	IVLIGDSGVGK(1)SNLMTR	-2.8877	1278200	1243300	1186300	297040	274900	277990	206730	0	213000	827410	905640	836020	242800	226910	240780	130100	134760	154520	2.47	2.35467	2.33446	0.592312	0.591086	0.547562	0.381952		0.390348	1.67348	1.72827	1.62725	0.48787	0.465649	0.490901	0.251494	0.272161	0.305192
LmxM.10.0910	159	K	2.1107	0.000358848	Up	small GTP-binding protein Rab11, putative OS=Leishmania_mexicana_MHOM/GT/2001/U1103 GN=LmxM.10.0910	LmxM.10.0910	1	1.06572e-10	130.99	2	TNVDK(1)AFEWLAK	-1.6908	136820	134130	135900	0	0	71245	0	64789	61779	105010	113250	108270	0	68886	71510	42811	46879	42480	1.56938	1.50785	1.58742			0.832986		0.704974	0.672036	1.26069	1.28284	1.25091		0.839102	0.865404	0.491229	0.561983	0.498027
LmxM.10.1030	366	K	4.1863	6.3268e-05	Up	RNA-binding protein-like protein OS=Leishmania_mexicana_MHOM/GT/2001/U1103 GN=LmxM.10.1030	LmxM.10.1030	1	2.68021e-16	143.22	2	TTDVVTAAPK(1)SSPK	-1.074	314240	255090	265400	47948	58808	53952	0	48121	0	193480	196660	210360	61252	0	0	0	23876	0	2.25318	2.07857	2.00723	0.533579	0.609033	0.491154		0.385195		1.14227	1.08311	1.21301	0.428646				0.12381
LmxM.10.1160	27	K	10.4258	2.56618e-06	Up	Ras-related protein RabX1, putative OS=Leishmania_mexicana_MHOM/GT/2001/U1103 GN=LmxM.10.1160	LmxM.10.1160	1	2.56256e-93	158.02	2	IIVIGDSGVGK(1)SSLTVR	0.07484	324650	344480	314550	33859	29907	27201	26205	0	25513	128600	156800	146110	44719	35593	47544	22365	32684	30921	3.13661	3.14414	2.86344	0.377345	0.333961	0.295208	0.236207		0.219062	1.29522	1.51782	1.45748	0.47365	0.363033	0.479269	0.195138	0.281565	0.266954
LmxM.10.1190	38	K	15.4156	0.000401582	Up	flagellar protofilament ribbon protein-like protein OS=Leishmania_mexicana_MHOM/GT/2001/U1103 GN=LmxM.10.1190	LmxM.10.1190	1	4.37066e-274	270.45	2	GIAAASSVGSAASASSPMNTK(1)TK	-3.7029	234550	237460	238930	20168	18867	15131	0	6541.2	0	109180	114630	124660	8927.1	7807.5	0	0	0	0	2.36681	2.45979	2.43411	0.213419	0.200204	0.152824		0.0615495		1.3033	1.33379	1.56269	0.0886127	0.0761192
LmxM.10.1230	266	K	2.30949	3.94863e-05	Up	Beta-1,2 mannosyltransferase OS=Leishmania_mexicana_MHOM/GT/2001/U1103 GN=LmxM.10.1230	LmxM.10.1230	1	4.69074e-05	81.48	2	ILGTK(1)NCFPEYPAK	1.2132	188780	192420	194230	137930	123130	0	100950	0	0	157640	0	165530	0	0	83906	0	0	0	1.34169	1.37185	1.40568	0.639035	0.588736		0.555832			1.20214		1.1788			0.575284
LmxM.10.1290	44	K	2.1381	0.0163694	Up	Beta-1,2 mannoside phosphorylase OS=Leishmania_mexicana_MHOM/GT/2001/U1103 GN=LmxM.10.1290	LmxM.10.1290	1	0.00137389	93.561	2	GK(1)MHIYGR	10.988	93801	77052	78273	49437	43569	0	0	0	26596	46845	48653	42024	0	12579	0	0	0	0	1.81535	1.54919	1.5911	0.942776	0.865896				0.509104	0.938632	0.977906	0.866661		0.244302
LmxM.10.1280	48	K	13.2804	9.07099e-07	Up	Beta-1,2 mannoside phosphorylase OS=Leishmania_mexicana_MHOM/GT/2001/U1103 GN=LmxM.10.1280	LmxM.10.1280	1	1.76681e-07	122.44	2	GK(1)THIYGR	-1.0102	384810	343610	394080	26588	26701	25677	20780	25121	0	159890	168980	178810	33269	25495	28251	10330	15229	12898	3.12559	2.8159	3.26124	0.266137	0.270106	0.249803	0.167349	0.20153		1.49816	1.62093	1.6564	0.280482	0.211469	0.250745	0.110058	0.162481	0.137966
LmxM.11.0100	408	K	1.58612	5.26615e-06	Up	seryl-tRNA synthetase OS=Leishmania_mexicana_MHOM/GT/2001/U1103 GN=LmxM.11.0100	LmxM.11.0100	1	1.20575e-10	93.162	2	FGPNTK(1)GSTANNTK	-1.0432	105450	91209	94538	49839	49942	49513	47475	46330	47262	0	83849	81967	45634	0	42518	38377	40971	41930	1.74052	1.50186	1.54491	1.01968	1.06716	1.02385	0.982512	0.961302	0.981991		1.39443	1.37069	0.801529		0.779949	0.426158	0.481343	0.497287
LmxM.11.0210	398	K	3.53736	9.13255e-07	Up	acidocalcisomal pyrophosphatase OS=Leishmania_mexicana_MHOM/GT/2001/U1103 GN=LmxM.11.0210	LmxM.11.0210	1	2.24753e-26	117.99	2	VYK(1)ICQGGVENK	-1.9678	124240	118970	118040	30305	35833	42873	37117	32275	34084	94333	99295	95204	38931	36586	0	29603	31015	36986	2.24886	2.1592	2.16712	0.511746	0.642667	0.745107	0.656228	0.554892	0.60692	1.4379	1.5566	1.47153	0.669765	0.641355		0.396219	0.416451	0.499396
LmxM.11.0240	86	K	5.19703	3.43122e-07	Up	proteasome alpha 7 subunit, putative OS=Leishmania_mexicana_MHOM/GT/2001/U1103 GN=LmxM.11.0240	LmxM.11.0240	1	2.28036e-81	211.84	2	VLINK(1)AQLECQR	1.3527	1085300	920640	883250	189570	190440	184330	166810	163530	161050	568260	581800	577090	166580	177910	167240	135970	142690	166410	3.05504	2.49734	2.54596	0.584419	0.580998	0.579028	0.465296	0.460822	0.445967	1.53359	1.63596	1.58451	0.427348	0.463678	0.433985	0.319972	0.346316	0.389849
LmxM.11.0240	117	K	8.24814	6.28659e-07	Up	proteasome alpha 7 subunit, putative OS=Leishmania_mexicana_MHOM/GT/2001/U1103 GN=LmxM.11.0240	LmxM.11.0240	1	3.33818e-106	197.79	2	YVAGVQQK(1)STQSGGSR	-1.2259	133260	138970	132290	18437	14427	17369	11260	15627	15879	83466	81083	83441	20718	0	22098	4742.6	7959.9	7157.2	2.90584	2.92021	2.95393	0.440301	0.340956	0.422653	0.243305	0.341127	0.34062	1.74492	1.76618	1.77475	0.411729		0.444215	0.0864551	0.149655	0.129887
LmxM.11.0350	157	K	2.9056	0.00163772	Up	14-3-3 protein 2, putative OS=Leishmania_mexicana_MHOM/GT/2001/U1103 GN=LmxM.11.0350	LmxM.11.0350	1	0.000911974	93.467	2	NLALEAYK(1)K	-0.79487	188240	182990	180580	53023	0	54316	0	44523	43244	137690	138240	142070	0	0	48199	36306	0	42767	1.6929	1.76932	1.69785	0.691766		0.702125		0.492953	0.481025	1.19671	1.27119	1.26163			0.514312	0.307712		0.382099
LmxM.11.0360	142	K	2.89321	0.00055206	Up	Optic atrophy 3 protein (OPA3), putative OS=Leishmania_mexicana_MHOM/GT/2001/U1103 GN=LmxM.11.0360	LmxM.11.0360	1	1.78028e-79	160.37	2	AVESSTATTAK(1)SAATPATVTPR	-2.7463	87461	74744	79880	20792	18913	19584	37130	36306	38576	44261	44837	46948	32246	30176	33189	17081	22766	23883	2.44942	1.77443	1.83545	0.575924	0.529362	0.477083	0.879782	0.840526	0.885953	1.74985	1.10539	1.34528	1.09668	0.879548	0.940229	0.396502	0.404245	0.514258
LmxM.11.0480	850	K	3.30049	0.000131692	Up	mRNA cap guanine-N7 methyltransferase, putative OS=Leishmania_mexicana_MHOM/GT/2001/U1103 GN=LmxM.11.0480	LmxM.11.0480	1	0.0015302	97.033	2	YVGIDLK(1)R	2.0188	41969	0	42833	16598	20320	17794	13556	0	0	29583	28292	29904	0	9257.3	0	0	0	0	1.7975		1.86417	0.485126	0.58847	0.526967	0.618295			1.06816	1.00798	1.08704		0.379271
LmxM.11.0580	74	K	7.20984	4.61384e-08	Up	cytochrome b5, putative OS=Leishmania_mexicana_MHOM/GT/2001/U1103 GN=LmxM.11.0580	LmxM.11.0580	1	1.42645e-22	112.68	2	SK(1)SFIIGCVDPEESK	0.64069	380530	369940	374200	70743	68845	73765	57259	53393	55845	237360	226620	238700	73927	0	76745	44990	0	49720	2.44987	2.48824	3.04082	0.370549	0.357555	0.345272	0.443496	0.318874	0.377598	1.75845	1.54239	1.63152	0.502758		0.490715	0.268349		0.390402
LmxM.11.0630	82	K	4.10596	6.53952e-06	Up	metallo-peptidase, Clan MF, Family M17 OS=Leishmania_mexicana_MHOM/GT/2001/U1103 GN=LmxM.11.0630	LmxM.11.0630	1	2.82703e-41	163.93	2	VK(1)AGATVK(1)TLAEVSGR	-2.2127	753720	706060	744330	236300	194040	0	187850	181420	183110	507940	494980	526840	273090	239010	269150	252150	272110	281380	2.38154	2.14097	2.29305	0.707569	0.575071		0.512432	0.485462	0.486	1.59661	1.51516	1.58107	0.756052	0.648298	0.747035	0.504438	0.536652	0.55704
LmxM.11.0630	255	K	1.68682	0.00374919	Up	metallo-peptidase, Clan MF, Family M17 OS=Leishmania_mexicana_MHOM/GT/2001/U1103 GN=LmxM.11.0630	LmxM.11.0630	1	3.05416e-05	79.311	2	EK(1)GYGGIYAVGK	1.5093	128740	132800	122190	0	83748	86272	0	73649	0	76512	99747	87628	44231	0	63522	66056	79026	81365	1.7231	1.70576	1.59454		1.05137	1.09185		0.834812		1.01875	1.29337	1.11395	0.518709		0.74683	0.559773	0.660191	0.68231
LmxM.11.0630	288	K	5.90529	1.28161e-05	Up	metallo-peptidase, Clan MF, Family M17 OS=Leishmania_mexicana_MHOM/GT/2001/U1103 GN=LmxM.11.0630	LmxM.11.0630	1	2.08628e-106	209.84	2	YRNPNATVGAK(1)NVAMTGK	-2.9649	542280	506340	520310	112180	120950	116500	75541	74403	73690	335840	345010	334540	149910	146620	151160	110530	113220	115860	2.89895	2.59765	2.71194	0.568316	0.606465	0.588892	0.34864	0.336845	0.330904	1.78603	1.78679	1.69859	0.702177	0.672855	0.709828	0.374109	0.377782	0.388058
LmxM.11.0630	377	K	1.58694	0.00205551	Up	metallo-peptidase, Clan MF, Family M17 OS=Leishmania_mexicana_MHOM/GT/2001/U1103 GN=LmxM.11.0630	LmxM.11.0630	1	4.76446e-50	153.18	2	SGK(1)SVEVMNTDAEGR	0.34804	140450	113390	110360	72321	68735	70092	102020	93085	99480	89972	102470	100070	87206	78960	81365	71791	74321	76887	1.81382	1.4053	1.38958	0.885103	0.832592	0.85592	1.13746	1.01806	1.07916	1.1559	1.28201	1.22744	0.986772	0.875367	0.923015	0.587007	0.599079	0.622114
LmxM.11.0630	36	K	2.01743	5.93432e-06	Up	metallo-peptidase, Clan MF, Family M17 OS=Leishmania_mexicana_MHOM/GT/2001/U1103 GN=LmxM.11.0630	LmxM.11.0630	1	1.62671e-42	180.17	2	SSVTFTDISK(1)VSCVAPR	-1.1558	642430	647200	656480	338780	322440	338510	0	0	0	525000	490640	526270	304470	267730	283600	277050	290820	240220	1.83529	1.77435	1.82853	0.91718	0.863994	0.914415				1.49203	1.35789	1.42795	0.762118	0.656579	0.71168	0.501117	0.518567	0.429966
LmxM.11.0880	205	K	8.65575	7.33903e-08	Up	START domain containing protein, putative OS=Leishmania_mexicana_MHOM/GT/2001/U1103 GN=LmxM.11.0880	LmxM.11.0880	1	3.02845e-08	157.9	2	NK(1)HGPYIR	-2.7586	623870	553160	644500	88995	80689	84948	51095	61998	68029	320590	353870	357330	0	51286	55598	0	22357	0	2.80594	2.36872	3.15062	0.363739	0.335408	0.340316	0.256012	0.293456	0.33471	1.41253	1.56245	1.63435		0.224552	0.253336		0.0893742
LmxM.11.0960	177	K	7.87371	2.28748e-06	Up	40S ribosomal protein S5 OS=Leishmania_mexicana_MHOM/GT/2001/U1103 GN=LmxM.11.0960	LmxM.11.0960	1	7.37487e-19	200.11	2	GSSNSYAIK(1)K	-0.62652	1749800	1763100	1761500	0	161020	0	177730	173510	0	1202600	1207700	1230200	221650	214980	221190	0	138720	0	2.10213	2.0706	1.87589		0.238232		0.269691	0.260281		1.20566	1.25496	1.23584	0.263771	0.24179	0.243056		0.206528
LmxM.11.0960	142	K	4.69643	7.33545e-07	Up	40S ribosomal protein S5 OS=Leishmania_mexicana_MHOM/GT/2001/U1103 GN=LmxM.11.0960	LmxM.11.0960	1	4.91744e-36	196.44	2	VNEAIYQMCK(1)GAR	0.2028	457370	438620	470520	76316	79675	79814	65154	61727	65755	346860	344960	340840	49263	45471	54708	24543	28338	29961	2.54196	2.38307	2.3181	0.647074	0.545347	0.548171	0.45738	0.428375	0.458188	1.60876	1.65832	1.58404	0.271213	0.236595	0.278113	0.16565	0.195182	0.199008
LmxM.11.1000	14	K	3.01955	7.17154e-06	Up	pyruvate phosphate dikinase, putative OS=Leishmania_mexicana_MHOM/GT/2001/U1103 GN=LmxM.11.1000	LmxM.11.1000	1	1.61129e-07	97.594	2	HVYYFGGSK(1)ADGNR	0.6687	296670	262720	255270	0	112080	112460	110200	0	111260	173840	186270	184060	97297	84831	92356	79774	86952	91307	2.58707	2.23942	2.18809		0.816475	0.817038	0.730643		0.733254	1.37439	1.48118	1.46448	0.761115	0.669559	0.733009	0.364115	0.394796	0.417597
LmxM.11.1000	126	K	2.45478	2.97904e-07	Up	pyruvate phosphate dikinase, putative OS=Leishmania_mexicana_MHOM/GT/2001/U1103 GN=LmxM.11.1000	LmxM.11.1000	1	0.0015302	82.716	2	TVEAWVK(1)R	0.26201	198390	209700	193600	92665	105050	91384	0	106990	105580	153090	154890	164960	102120	0	93431	81203	82358	87069	1.99937	2.06576	1.91783	0.781818	0.884402	0.767279		0.824473	0.804148	1.39877	1.4234	1.51685	0.92321		0.856987	0.42834	0.432153	0.460209
LmxM.11.1000	5	K	3.08163	8.85458e-08	Up	pyruvate phosphate dikinase, putative OS=Leishmania_mexicana_MHOM/GT/2001/U1103 GN=LmxM.11.1000	LmxM.11.1000	1	6.12013e-34	184.43	2	MNAAK(1)HVYYFGGSK	-0.33313	408280	434870	458730	181320	174770	173980	165180	166080	182830	344370	328310	337360	149580	156880	163230	200500	202390	211620	2.10842	2.19517	2.32856	0.783902	0.753958	0.74853	0.648554	0.655808	0.713556	1.61232	1.54602	1.58959	0.692931	0.733275	0.767202	0.541948	0.544186	0.573159
LmxM.11.1030	259	K	4.7579	6.8192e-08	Up	hypothetical protein, conserved OS=Leishmania_mexicana_MHOM/GT/2001/U1103 GN=LmxM.11.1030	LmxM.11.1030	1	6.09572e-36	191.25	2	VEAAAQK(1)SPR	1.2905	809850	779850	968490	170150	184690	180750	185770	208150	238150	409340	482790	489340	221320	191340	200920	116590	141830	131120	2.5864	2.46862	3.01734	0.51439	0.562942	0.55197	0.52411	0.577569	0.662264	1.39264	1.56117	1.65093	0.667927	0.57483	0.606807	0.299844	0.358078	0.312304
LmxM.11.1030	74	K	7.13469	0.000359155	Up	hypothetical protein, conserved OS=Leishmania_mexicana_MHOM/GT/2001/U1103 GN=LmxM.11.1030	LmxM.11.1030	1	4.38232e-59	94.865	2	GVYACVAEPPSTTSGPYAGVK(1)TVVVR	-1.5042	236850	217720	215040	14291	25014	0	43005	43053	48172	76074	108440	103020	28104	0	17944	0	14014	0	3.01909	2.75076	2.67398	0.172438	0.304308		0.484258	0.476806	0.53467	1.033	1.39956	1.38723	0.338522		0.2163		0.141216
LmxM.11.1030	231	K	13.5546	6.06211e-05	Up	hypothetical protein, conserved OS=Leishmania_mexicana_MHOM/GT/2001/U1103 GN=LmxM.11.1030	LmxM.11.1030	1	7.8649e-60	182.22	3	IHGGHSYK(1)SVALALAEELR	-1.2786	739200	856460	881100	75003	81635	87273	0	38542	40325	459860	581010	525940	122080	113170	110460	95198	108130	100280	2.71627	3.1194	3.15845	0.260891	0.286297	0.306646		0.12305	0.129025	1.80012	2.1617	2.04161	0.423909	0.391188	0.383842	0.281697	0.314106	0.274817
LmxM.11.1170	510	K	2.37854	0.0100684	Up	eukaryotic release factor 3, putative OS=Leishmania_mexicana_MHOM/GT/2001/U1103 GN=LmxM.11.1170	LmxM.11.1170	1	1.5336e-12	70.598	2	AK(1)NLIFMPVAGLTGENLIK	1.175	116880	120390	152350	68499	69562	65691	51053	0	20071	0	71649	98288	20896	0	0	0	0	0	1.48057	1.54644	1.91833	0.790284	0.815839	0.732407	0.805647		0.321075		0.886807	1.18115	0.268243
LmxM.12.0060	75	K	5.83873	1.17149e-08	Up	ribonuclease mar1 OS=Leishmania_mexicana_MHOM/GT/2001/U1103 GN=LmxM.12.0060	LmxM.12.0060	1	1.15395e-10	111.38	2	IVPEITLPK(1)TAHVIEK	0.0062227	962480	948080	844800	113070	100510	107670	190380	181440	189060	601880	646420	598790	0	162640	154230	238490	255810	278920	2.79272	2.6544	2.39231	0.435045	0.396355	0.415193	0.4825	0.470869	0.485358	1.82814	2.00596	1.82284		0.49154	0.481705	0.35474	0.381651	0.422445
LmxM.12.0210	44	K	8.74484	8.05777e-05	Up	proteasome regulatory ATPase subunittcc1l8.3, putative OS=Leishmania_mexicana_MHOM/GT/2001/U1103 GN=LmxM.12.0210	LmxM.12.0210	1	0.0062582	79.809	2	DIK(1)NIQLK	-1.6165	179890	156610	162820	0	0	0	18392	0	19681	103800	101850	99655	19932	0	17683	0	13646	0	2.14126	1.84414	1.86869				0.212003		0.234287	1.22587	1.25104	1.20699	0.233012		0.208594		0.184208
LmxM.12.0210	49	K	5.91254	2.74975e-05	Up	proteasome regulatory ATPase subunittcc1l8.3, putative OS=Leishmania_mexicana_MHOM/GT/2001/U1103 GN=LmxM.12.0210	LmxM.12.0210	1	1.03033e-12	135.63	2	NIQLK(1)TMICR	-2.7389	380120	326380	313390	47882	56166	0	0	0	54244	254020	244370	195930	0	0	55951	0	0	52354	2.04201	1.7345	1.62327	0.288694	0.333155				0.291426	1.35392	1.35467	1.07098			0.297872			0.31978
LmxM.12.0210	204	K	42.537	3.34371e-06	Up	proteasome regulatory ATPase subunittcc1l8.3, putative OS=Leishmania_mexicana_MHOM/GT/2001/U1103 GN=LmxM.12.0210	LmxM.12.0210	1	1.60477e-16	149.02	2	GVLLYGPPGTGK(1)TMLVK	-1.2164	1789500	1793300	1756600	43678	0	0	0	34448	40020	1291100	1313200	1289200	73541	87479	94655	0	0	0	2.16234	2.14367	2.04661	0.0592358				0.0417451	0.0483625	1.54789	1.63747	1.5851	0.0872745	0.106354	0.11335
LmxM.12.0210	216	K	23.8216	6.5783e-06	Up	proteasome regulatory ATPase subunittcc1l8.3, putative OS=Leishmania_mexicana_MHOM/GT/2001/U1103 GN=LmxM.12.0210	LmxM.12.0210	1	9.59044e-08	162.59	2	HTK(1)ASFIR	-1.1535	1615900	1361900	1364000	59260	0	55443	0	50837	0	766810	783620	808920	84388	102040	88357	0	0	54558	2.82392	2.35448	2.29837	0.116232		0.108535		0.0890975		1.32957	1.41316	1.43842	0.144838	0.179417	0.153025			0.108408
LmxM.12.0220	261	K	15.0872	2.52576e-07	Up	hydroxyacylglutathione hydrolase, putative OS=Leishmania_mexicana_MHOM/GT/2001/U1103 GN=LmxM.12.0220	LmxM.12.0220	1	3.46889e-53	160.04	2	YAAAVQAGNPSVPSSLAEEK(1)R	-1.2089	188730	191060	191200	0	0	0	15180	13152	14082	114480	123750	124970	0	0	0	0	0	0	1.93871	1.93276	1.85653				0.135763	0.120648	0.123249	1.05476	1.13258	1.09478
LmxM.12.0250	686	K	4.27949	0.00142248	Up	cysteinyl-tRNA synthetase, putative OS=Leishmania_mexicana_MHOM/GT/2001/U1103 GN=LmxM.12.0250	LmxM.12.0250	1	0.000590501	97.277	2	LANQVETK(1)R	-1.7567	153750	0	168960	35844	0	25845	28472	0	0	77137	68861	79614	0	15113	0	0	0	11622	2.12646		2.36867	0.618426		0.448157	0.508998			1.03626	0.920933	1.08849		0.224014				0.160777
LmxM.12.0250	431	K	4.64917	7.47599e-08	Up	cysteinyl-tRNA synthetase, putative OS=Leishmania_mexicana_MHOM/GT/2001/U1103 GN=LmxM.12.0250	LmxM.12.0250	1	0.000571526	109.88	2	SLK(1)NFITIR	-2.2405	499170	470540	473040	88594	85708	88600	74887	74427	0	273300	304340	277490	86472	86652	95186	50214	0	67134	2.3736	2.22286	2.28001	0.525525	0.507525	0.528208	0.46028	0.443584		1.2623	1.39937	1.30437	0.446592	0.441591	0.496935	0.242083		0.319302
LmxM.12.0250	752	K	2.51819	5.16504e-05	Up	cysteinyl-tRNA synthetase, putative OS=Leishmania_mexicana_MHOM/GT/2001/U1103 GN=LmxM.12.0250	LmxM.12.0250	1	4.59692e-06	116.13	2	YAK(1)SYDEFIGK	1.6356	300080	304770	312560	0	0	99355	0	88401	101560	0	229380	217200	0	105910	106170	79728	78580	0	1.63711	1.65185	1.72844			0.679585		0.604484	0.708395		1.21007	1.17138		0.619244	0.635933	0.440995	0.434918
LmxM.12.0530	129	K	2.52853	0.00462999	Up	glucose-6-phosphate isomerase OS=Leishmania_mexicana_MHOM/GT/2001/U1103 GN=LmxM.12.0530	LmxM.12.0530	1	4.07881e-05	60.547	2	AFVK(1)AMFDGQR	1.5857	131870	138850	0	0	0	0	0	61938	55941	0	0	0	0	0	48426	32693	31685	36394	2.16482	2.34982						0.93381	0.851672						0.747123	0.35632	0.355432	0.402183
LmxM.12.0530	283	K	2.30997	0.000124036	Up	glucose-6-phosphate isomerase OS=Leishmania_mexicana_MHOM/GT/2001/U1103 GN=LmxM.12.0530	LmxM.12.0530	1	2.11848e-09	119.94	2	AK(1)NISTDGAVAK	-2.2539	201190	218010	224710	0	91442	0	92271	104070	0	149970	143750	151910	0	97713	110990	0	95714	0	1.58428	1.76977	1.77231		0.786626		0.679984	0.752623		1.09874	1.05088	1.12979		0.718891	0.821387		0.515026
LmxM.12.0530	573	K	5.43015	4.79305e-07	Up	glucose-6-phosphate isomerase OS=Leishmania_mexicana_MHOM/GT/2001/U1103 GN=LmxM.12.0530	LmxM.12.0530	1	1.48455e-38	187.1	2	VLAK(1)SILPQLK	-0.57671	832590	770560	757750	160060	153420	161750	136460	128700	132250	457690	516950	481780	0	174390	184320	136250	151100	153590	2.8454	2.71476	2.59376	0.588026	0.572782	0.582858	0.436439	0.403939	0.419154	1.45528	1.64013	1.55505		0.556823	0.592	0.309142	0.352861	0.35334
LmxM.12.0670	318	K	4.15542	2.6549e-06	Up	cytochrome oxidase subunit IV, putative OS=Leishmania_mexicana_MHOM/GT/2001/U1103 GN=LmxM.12.0670	LmxM.12.0670	1	3.76231e-111	268.95	2	AAEITK(1)NAEHQALVR	-3.3269	1595800	1335500	1381000	317680	318110	322130	512500	518400	544820	952760	1001200	1016900	462530	447320	456220	353660	372020	396220	2.57937	2.1074	2.20882	0.473409	0.464016	0.45262	0.62284	0.637155	0.6688	1.69707	1.73161	1.69144	0.702825	0.673815	0.667705	0.495229	0.517213	0.544027
LmxM.12.0670	285	K	2.93302	3.12764e-05	Up	cytochrome oxidase subunit IV, putative OS=Leishmania_mexicana_MHOM/GT/2001/U1103 GN=LmxM.12.0670	LmxM.12.0670	1	5.29312e-69	195.09	2	ACK(1)DLEQLEAWSR	1.2852	617740	613040	606980	183910	189040	197230	307370	312800	340150	564120	592690	557420	229250	230550	222800	154580	166610	210370	1.95122	1.89041	1.89717	0.53557	0.538856	0.541551	0.729975	0.751295	0.815976	1.96359	2.00318	1.81186	0.680739	0.678659	0.63722	0.422997	0.452655	0.564458
LmxM.12.0670	59	K	7.51262	1.91811e-11	Up	cytochrome oxidase subunit IV, putative OS=Leishmania_mexicana_MHOM/GT/2001/U1103 GN=LmxM.12.0670	LmxM.12.0670	1	2.24953e-45	210.4	2	THAK(1)TEEETAFAK	3.1198	665390	697520	690900	103050	101410	97368	114460	120130	120950	382190	404170	406370	108250	109890	104060	81922	85611	80845	2.95762	3.02684	3.03887	0.422304	0.406786	0.376226	0.382531	0.406034	0.4083	1.87209	1.92231	1.85879	0.45234	0.455209	0.418817	0.315465	0.327313	0.305258
LmxM.12.1120	64	K	8.08458	9.78399e-08	Up	Flagellum attachment zone protein 2 OS=Leishmania_mexicana_MHOM/GT/2001/U1103 GN=LmxM.12.1120	LmxM.12.1120	1	0.000522578	125.98	2	HK(1)NVITLMR	1.4708	526530	513410	502140	41287	40746	0	45841	48671	46420	283900	276810	277800	50593	54517	52751	29334	31405	0	2.55621	2.58961	2.62096	0.362005	0.359716		0.278847	0.302535	0.298049	1.69171	1.74579	1.65863	0.274007	0.299644	0.282386	0.119298	0.136695
LmxM.13.0090	488	K	6.88516	1.20347e-08	Up	metallo-peptidase, Clan MA(E) Family M32 OS=Leishmania_mexicana_MHOM/GT/2001/U1103 GN=LmxM.13.0090	LmxM.13.0090	1	1.33255e-43	167.76	2	ATGETLNPK(1)HFR	-0.33844	923790	698600	725600	147010	146550	143870	153600	150750	155870	347760	382560	389780	136080	132520	133880	104930	118170	120700	3.95283	2.89213	3.09011	0.487017	0.483049	0.457783	0.48894	0.47686	0.49229	1.34235	1.46917	1.50881	0.566553	0.556202	0.561821	0.303123	0.339884	0.34769
LmxM.13.0090	29	K	2.81012	4.65167e-07	Up	metallo-peptidase, Clan MA(E) Family M32 OS=Leishmania_mexicana_MHOM/GT/2001/U1103 GN=LmxM.13.0090	LmxM.13.0090	1	1.65248e-28	133.13	2	LEHLLSLGAWDAK(1)TMMPSK	1.6142	100320	100250	106940	48036	39806	46433	50763	54591	48336	50261	75995	62636	38746	35952	38293	22361	26922	21144	2.26744	2.19223	2.40564	0.840577	0.693055	0.780423	0.853542	0.912155	0.806385	1.02478	1.5416	1.28072	0.852092	0.797054	0.848819	0.341211	0.409019	0.321726
LmxM.13.0160	422	K	2.05254	0.00358048	Up	protein kinase A regulatory subunit OS=Leishmania_mexicana_MHOM/GT/2001/U1103 GN=LmxM.13.0160	LmxM.13.0160	1	2.43522e-18	75.006	3	TK(1)VCEFHSGDHFGELEFLNEHR	1.1234	63120	53673	0	23270	26361	24453	0	0	0	0	0	0	34451	0	31860	22873	0	27915	1.76244	1.4884		0.739674	0.861386	0.774655							1.07433		1.0093	0.57715		0.710799
LmxM.13.0280	433	K	10.026	0.000342351	Up	alpha tubulin OS=Leishmania_mexicana_MHOM/GT/2001/U1103 GN=LmxM.13.0280	LmxM.13.0280	1	1.46933e-17	140.01	2	GDVVPK(1)DVNAAIATIK(1)TK	0.10283	901800	562990	678960	0	0	0	69175	70490	107690	393380	356700	366630	38946	107620	112230	268010	259420	277080	3.05535	1.85156	2.23318				0.20301	0.201065	0.308086	1.47042	1.37247	1.36114	0.182821	0.511226	0.523061	0.489098	0.477306	0.511141
LmxM.13.0280	408	K	2.69237	2.90682e-07	Up	alpha tubulin OS=Leishmania_mexicana_MHOM/GT/2001/U1103 GN=LmxM.13.0280	LmxM.13.0280	1	1.02838e-13	110.52	2	HGK(1)YMSCCLMYR	-0.72834	790400	801860	818540	145860	144280	146330	359760	367910	374730	521030	518750	521870	191700	179170	176760	327630	333980	363310	2.07363	2.04206	2.08474	0.735143	0.712332	0.698161	0.817551	0.812613	0.830133	1.50808	1.54557	1.50028	0.696818	0.65905	0.637911	0.46298	0.475825	0.518974
LmxM.13.0280	491	K	9.52637	1.06748e-05	Up	alpha tubulin OS=Leishmania_mexicana_MHOM/GT/2001/U1103 GN=LmxM.13.0280	LmxM.13.0280	1	1.04798e-09	133.49	3	IDHK(1)FDLMYSK(1)R	-0.85612	466670	383830	395110	0	0	0	46096	54844	50049	299980	311230	312350	0	21591	0	108140	0	130600	2.24064	1.7889	1.84165				0.191709	0.221691	0.202909	1.58903	1.69703	1.64334		0.145346		0.279667		0.34142
LmxM.13.0280	260	K	5.7233	3.88965e-06	Up	alpha tubulin OS=Leishmania_mexicana_MHOM/GT/2001/U1103 GN=LmxM.13.0280	LmxM.13.0280	1	0.00459041	87.251	2	LSVDYGK(1)K	1.7237	3626900	3475300	3437200	269530	292430	226220	810450	827870	869040	1735800	1676600	0	421630	320870	311670	1072800	1088600	1110900	2.9508	2.74462	2.7148	0.421272	0.447732	0.334714	0.571148	0.567054	0.597021	1.55805	1.54911		0.475279	0.366018	0.348812	0.470129	0.480967	0.492112
LmxM.13.0450	27	K	30.8395	4.66595e-08	Up	ALBA-domain protein 1 OS=Leishmania_mexicana_MHOM/GT/2001/U1103 GN=LmxM.13.0450	LmxM.13.0450	1	1.90117e-105	304.34	2	K(1)FGYVDYTK(1)HR	1.9945	2881600	2912600	2801700	80545	81878	82091	72935	68272	74914	1669200	1734200	1775800	101790	100710	97257	63284	69505	66401	3.22445	3.25948	3.19009	0.117129	0.124064	0.118116	0.0888239	0.084191	0.0950537	1.8155	1.92177	2.02661	0.129862	0.132086	0.127945	0.0734113	0.0806974	0.0755802
LmxM.13.0570	114	K	3.62821	0.000654325	Up	40S ribosomal protein S12, putative OS=Leishmania_mexicana_MHOM/GT/2001/U1103 GN=LmxM.13.0570	LmxM.13.0570	1	6.87856e-05	117.21	2	RDVAGEVTK(1)TLK	-0.79728	641090	535230	519940	122820	126130	0	0	0	0	483310	469610	475270	0	105060	106050	0	0	63960	1.63022	1.35593	1.32171	0.3895	0.40205					1.18065	1.21853	1.19735		0.31314	0.322383			0.237397
LmxM.13.0570	74	K	6.34268	1.98524e-07	Up	40S ribosomal protein S12, putative OS=Leishmania_mexicana_MHOM/GT/2001/U1103 GN=LmxM.13.0570	LmxM.13.0570	1	1.15555e-83	194.83	2	TAHMCILADDCEDEEYK(1)K	-1.2937	423150	433340	411020	57134	56973	57526	40318	44852	0	368490	369560	370330	42972	48485	44424	20986	22744	18355	2.14339	2.18679	2.08126	0.360921	0.361751	0.367793	0.282375	0.311894		1.79308	1.91013	1.85844	0.257243	0.287864	0.269004	0.154354	0.168289	0.135707
LmxM.13.0570	57	K	2.1986	2.65065e-06	Up	40S ribosomal protein S12, putative OS=Leishmania_mexicana_MHOM/GT/2001/U1103 GN=LmxM.13.0570	LmxM.13.0570	1	5.56329e-173	224.45	3	TLDCK(1)TAHMCILADDCEDEEYKK	-0.059197	1161600	1081300	1040700	377860	355480	360780	389210	386460	384620	1036000	1003300	993410	387400	325280	345880	168740	0	183630	1.66859	1.54742	1.49442	0.676915	0.640091	0.654134	0.773029	0.762105	0.778669	1.42962	1.4706	1.41375	0.657661	0.547675	0.593953	0.351959		0.385013
LmxM.13.0870	154	K	1.90529	1.64611e-05	Up	mitochondrial processing peptidase alpha subunit, putative OS=Leishmania_mexicana_MHOM/GT/2001/U1103 GN=LmxM.13.0870	LmxM.13.0870	1	1.04919e-27	172.09	2	WK(1)SAASTSPLSHR	11.367	143150	154530	163710	92471	94865	0	117260	110340	116610	142810	138840	146820	110030	106030	0	62498	63485	64777	1.48872	1.5955	1.65662	0.753702	0.776582		0.90277	0.831863	0.882156	1.42951	1.38	1.46813	0.955594	0.915393		0.529277	0.54262	0.544859
LmxM.13.0870	444	K	14.7993	0.00035532	Up	mitochondrial processing peptidase alpha subunit, putative OS=Leishmania_mexicana_MHOM/GT/2001/U1103 GN=LmxM.13.0870	LmxM.13.0870	1	2.91429e-06	79.889	3	VQANK(1)ASVADSMLSVAK(1)K	1.03	144170	123950	173680	14001	0	0	0	0	11929	0	115970	0	65369	56772	53850	0	0	0	2.0296	1.73239	2.3791	0.154479					0.12216		1.56036		0.76851	0.663481	0.648326
LmxM.13.0870	448	K	6.50321	1.70432e-06	Up	mitochondrial processing peptidase alpha subunit, putative OS=Leishmania_mexicana_MHOM/GT/2001/U1103 GN=LmxM.13.0870	LmxM.13.0870	1	2.28964e-111	200.82	2	MAK(1)TQFVVQNVDTIR	0.041053	781650	697750	717910	178150	178090	171190	115290	122040	117530	616990	627960	626030	257400	226690	228570	143790	144940	159830	2.73556	2.42436	2.44473	0.488645	0.490607	0.451955	0.298698	0.309624	0.299207	2.07836	2.10044	2.10663	0.752288	0.658604	0.684108	0.409787	0.416894	0.452413
LmxM.13.0870	432	K	29.1963	5.48011e-06	Up	mitochondrial processing peptidase alpha subunit, putative OS=Leishmania_mexicana_MHOM/GT/2001/U1103 GN=LmxM.13.0870	LmxM.13.0870	1	1.72078e-132	254.38	3	VQANK(1)ASVADSMLSVAK(1)K	1.03	1994700	2018800	1994700	107750	107990	109150	68301	50655	0	1320000	1301800	1305400	191930	181860	198360	150410	152540	154290	3.53203	3.54896	3.43677	0.149533	0.150519	0.145798	0.0895323	0.0650229		2.24972	2.2031	2.22254	0.283812	0.267326	0.30038	0.216879	0.22199	0.220966
LmxM.13.0870	139	K	15.5249	5.41309e-10	Up	mitochondrial processing peptidase alpha subunit, putative OS=Leishmania_mexicana_MHOM/GT/2001/U1103 GN=LmxM.13.0870	LmxM.13.0870	1	1.0866e-11	143.56	2	NK(1)HYIGIR	0.12444	1272300	1146100	1148500	106500	97892	109130	93392	93032	103140	621870	632150	635960	113970	118050	108930	79199	80167	80164	4.09823	3.66514	3.59968	0.268862	0.248207	0.265175	0.222701	0.217238	0.24167	1.92803	1.94612	1.96968	0.306576	0.315668	0.300072	0.207741	0.212229	0.208847
LmxM.13.1000	356	K	3.48816	1.91734e-05	Up	hypothetical protein, conserved OS=Leishmania_mexicana_MHOM/GT/2001/U1103 GN=LmxM.13.1000	LmxM.13.1000	1	2.98976e-17	131.54	2	SK(1)SATIITQFPR	-1.9757	180990	170040	143480	44744	45437	53691	31621	31111	36075	121840	142810	131680	79791	61172	64628	0	0	0	1.99807	1.84904	1.59976	0.604897	0.612899	0.697976	0.39083	0.38038	0.436072	1.17625	1.38033	1.29007	0.970569	0.749633	0.777169
LmxM.13.1060	34	K	10.7902	2.46268e-07	Up	NADH-cytochrome b5 reductase, putative OS=Leishmania_mexicana_MHOM/GT/2001/U1103 GN=LmxM.13.1060	LmxM.13.1060	1	5.25888e-27	175.07	2	VAMDPTMFK(1)HFR	1.2609	241900	245460	264250	24527	28093	29553	22765	0	25583	114460	124360	121740	22545	22021	0	11336	14847	0	3.02435	3.07082	3.25379	0.278338	0.324582	0.339218	0.229576		0.27234	1.32923	1.47714	1.42128	0.281981	0.273088		0.116088	0.154958
LmxM.13.1090	291	K	3.42332	0.000367237	Up	proteasome regulatory ATPase subunit 2, putative OS=Leishmania_mexicana_MHOM/GT/2001/U1103 GN=LmxM.13.1090	LmxM.13.1090	1	6.67895e-22	123.24	3	VAEEHSPAIVFIDEIDAIGTK(1)R	-0.51369	98012	96544	107990	25330	27341	23782	0	0	18666	30948	35428	39223	0	0	0	0	0	0	1.78396	1.76089	1.96027	0.584274	0.640639	0.550377			0.368876	0.591947	0.689224	0.772318
LmxM.13.1100	311	K	3.08141	1.19792e-08	Up	leucyl-tRNA synthetase, putative OS=Leishmania_mexicana_MHOM/GT/2001/U1103 GN=LmxM.13.1100	LmxM.13.1100	1	0.000528618	105.81	2	FSYK(1)GYYVR	1.4149	267340	290530	281310	112900	117180	111340	106530	0	105610	212970	213980	225690	0	0	0	0	0	0	1.48173	1.62584	1.56871	0.508098	0.530784	0.491333	0.503786		0.495294	1.03622	1.03079	1.09626
LmxM.13.1100	64	K	5.95795	5.22632e-07	Up	leucyl-tRNA synthetase, putative OS=Leishmania_mexicana_MHOM/GT/2001/U1103 GN=LmxM.13.1100	LmxM.13.1100	1	2.60808e-198	254.47	3	LHLGHGFSLTK(1)AEFASR	-0.94088	677700	526600	450520	129840	127530	116030	101080	91654	108440	317460	375040	308850	81342	80429	88697	40866	35131	47950	3.39305	2.66203	2.26944	0.527849	0.521823	0.462533	0.431804	0.391017	0.459404	1.39531	1.63201	1.35517	0.429446	0.42663	0.473129	0.294422	0.256774	0.349782
LmxM.13.1100	736	K	1.98878	2.26822e-07	Up	leucyl-tRNA synthetase, putative OS=Leishmania_mexicana_MHOM/GT/2001/U1103 GN=LmxM.13.1100	LmxM.13.1100	1	0.000272596	109.88	2	SK(1)GNFISLR	-1.5771	165230	170700	171710	106860	102110	96962	104960	101230	106350	147670	153590	150520	0	0	92815	0	32174	0	1.39998	1.46031	1.46379	0.735181	0.707062	0.654111	0.758793	0.730855	0.762467	1.09838	1.13106	1.11768			0.837852		0.397964
LmxM.13.1230	171	K	5.7692	4.24703e-07	Up	40S ribosomal protein S4, putative OS=Leishmania_mexicana_MHOM/GT/2001/U1103 GN=LmxM.13.1230	LmxM.13.1230	1	0.00129152	123.5	2	K(1)CVDLIK(1)NR	2.2148	356420	329950	324330	71835	72306	0	62325	0	61999	248540	271660	251000	0	0	0	0	0	0	1.88157	1.58559	1.56851	0.302206	0.289919		0.285706		0.285974	1.2185	1.24183	1.12462
LmxM.13.1230	91	K	21.6082	3.56657e-06	Up	40S ribosomal protein S4, putative OS=Leishmania_mexicana_MHOM/GT/2001/U1103 GN=LmxM.13.1230	LmxM.13.1230	1	2.82397e-68	165.02	2	YPAGFMDVVEIPK(1)TGDR	-0.8731	1516900	1493000	1429600	0	119560	112870	57174	56591	54791	1135000	1044400	1043900	0	0	113130	0	0	0	2.40956	2.15886	2.08035		0.144248	0.134393	0.0788638	0.0792775	0.0760455	1.67436	1.43656	1.40739			0.168844
LmxM.13.1230	238	K	5.96384	2.25815e-06	Up	40S ribosomal protein S4, putative OS=Leishmania_mexicana_MHOM/GT/2001/U1103 GN=LmxM.13.1230	LmxM.13.1230	1	3.38724e-93	203.93	2	DLNNLQVTVPK(1)QQGLR	-1.664	665250	577220	556240	134000	138980	133390	92790	93267	0	499810	555880	484620	97774	95220	102430	23149	18195	31046	2.84728	2.2489	2.18096	0.457045	0.451794	0.427942	0.344861	0.352042		1.98665	2.06017	1.76043	0.414943	0.38789	0.411907	0.122109	0.0971885	0.163724
LmxM.13.1230	194	K	4.12504	0.00162003	Up	40S ribosomal protein S4, putative OS=Leishmania_mexicana_MHOM/GT/2001/U1103 GN=LmxM.13.1230	LmxM.13.1230	1	3.35565e-49	191.98	3	IGEIVK(1)VECHPGAFNIAHLK	0.32766	1068100	968130	857750	0	0	0	235290	0	272080	946370	1194500	1027400	281990	251610	265300	0	150940	187360	1.95016	1.60907	1.4347				0.373043		0.434048	1.60469	1.88851	1.5921	0.510518	0.437242	0.455116		0.343938	0.421499
LmxM.13.1230	50	K	8.58931	6.75442e-07	Up	40S ribosomal protein S4, putative OS=Leishmania_mexicana_MHOM/GT/2001/U1103 GN=LmxM.13.1230	LmxM.13.1230	1	0.000988848	108.92	2	LK(1)YALNAR	0.93375	571940	511710	512660	94360	95295	93770	48418	50592	53183	442980	458770	462180	51180	48326	46077	0	12489	9792.5	2.95315	2.40515	2.42497	0.388268	0.373722	0.362924	0.21709	0.230376	0.239933	2.12418	2.05119	2.02544	0.262032	0.237493	0.223535		0.0804786	0.0623003
LmxM.13.1230	103	K	9.43155	5.10251e-07	Up	40S ribosomal protein S4, putative OS=Leishmania_mexicana_MHOM/GT/2001/U1103 GN=LmxM.13.1230	LmxM.13.1230	1	3.99748e-05	117.18	2	LMYDVK(1)GR	1.085	2369400	2121400	2110200	0	275030	322850	247820	243970	0	1563800	1595600	1569200	183860	173130	179720	0	0	70735	2.75627	2.24641	2.24878		0.243	0.281514	0.250332	0.250288		1.68941	1.60725	1.5493	0.212075	0.191686	0.196429			0.101386
LmxM.13.1230	176	K	4.87634	4.28565e-06	Up	40S ribosomal protein S4, putative OS=Leishmania_mexicana_MHOM/GT/2001/U1103 GN=LmxM.13.1230	LmxM.13.1230	1	1.57797e-12	112.93	2	QGK(1)AVIVTGGANR	-1.7214	267060	184650	188050	46277	60786	53262	55307	39868	49181	155260	161530	0	0	50322	0	25610	0	0	2.81033	1.76881	1.81286	0.388082	0.485843	0.42013	0.50539	0.369994	0.452198	1.51733	1.4719			0.504014		0.332146
LmxM.13.1480	99	K	24.0077	0.000273073	Up	Ran-binding protein 1, putative OS=Leishmania_mexicana_MHOM/GT/2001/U1103 GN=LmxM.13.1480	LmxM.13.1480	1	4.32581e-17	117.3	2	LAAQHYLVK(1)GMK	-0.081453	1296500	1251800	1264400	74467	83975	0	20420	20656	56589	855360	884510	885250	19675	0	63369	20169	19888	23994	3.41695	3.25526	3.19689	0.20519	0.238044		0.051263	0.0505285	0.14011	1.86242	1.89536	1.97513	0.0470362		0.158165	0.0373828	0.0368158	0.0426638
LmxM.13.1580	97	K	10.9161	4.14365e-10	Up	ubiquitin-conjugating enzyme, putative OS=Leishmania_mexicana_MHOM/GT/2001/U1103 GN=LmxM.13.1580	LmxM.13.1580	1	0.000165688	98.009	3	EK(1)FHVFK(1)HWDR	-0.59937	815210	651340	698820	53370	54963	53798	64566	62236	67234	433260	432320	439060	69541	63070	66453	62318	63848	67991	3.33512	2.80804	2.91366	0.278446	0.289502	0.295344	0.262782	0.252508	0.280762	1.91046	1.89464	1.95329	0.329345	0.302149	0.310963	0.208772	0.212118	0.230466
LmxM.13.1580	102	K	4.01086	2.99468e-06	Up	ubiquitin-conjugating enzyme, putative OS=Leishmania_mexicana_MHOM/GT/2001/U1103 GN=LmxM.13.1580	LmxM.13.1580	1	2.62928e-07	154.28	3	FHVFK(1)HWDRR	1.2917	1048200	1026200	1094200	248240	237230	235650	221110	231120	225900	705520	647380	726610	250250	256410	241160	149020	147340	177560	2.29938	2.37221	2.44622	0.694449	0.670001	0.693674	0.482531	0.502802	0.505815	1.66811	1.52127	1.73329	0.635492	0.658657	0.605097	0.267688	0.262468	0.322721
LmxM.13.1580	81	K	4.9876	7.77118e-06	Up	ubiquitin-conjugating enzyme, putative OS=Leishmania_mexicana_MHOM/GT/2001/U1103 GN=LmxM.13.1580	LmxM.13.1580	1	1.69712e-83	173.54	2	FLSK(1)VNLPCVDSDGTVNR	-1.4415	2674700	2559100	2250100	0	0	0	516010	504680	512270	1445300	1724900	1528200	332350	299550	295320	403920	452410	452730	2.41203	2.43192	2.06796				0.462931	0.451354	0.471536	1.4048	1.66629	1.49862	0.346955	0.316326	0.304617	0.298277	0.331305	0.338269
LmxM.13.1660	280	K	11.9172	3.44084e-08	Up	chaperonin TCP20, putative OS=Leishmania_mexicana_MHOM/GT/2001/U1103 GN=LmxM.13.1660	LmxM.13.1660	1	0.000530891	121.52	2	QIIELK(1)R	1.4791	365470	343770	336520	28291	27278	28964	0	29850	0	235330	239460	233960	35418	0	38165	21151	23251	24485	2.70834	2.51159	2.45196	0.209216	0.200365	0.216964		0.231808		1.53544	1.58654	1.56358	0.259984		0.279508	0.178368	0.193157	0.213336
LmxM.13.1670	96	K	10.2942	5.14349e-05	Up	60S ribosomal protein L44, putative OS=Leishmania_mexicana_MHOM/GT/2001/U1103 GN=LmxM.13.1670	LmxM.13.1670	1	0.000411546	122.44	2	HFELNDK(1)K	2.4015	236750	213060	211570	0	38465	39481	0	0	0	154100	153190	152990	22030	16733	0	0	11107	0	2.38542	2.0213	2.0719		0.21004	0.209524				1.06617	1.07721	1.07084	0.203857	0.164124			0.15753
LmxM.13.1670	60	K	7.11857	1.42097e-05	Up	60S ribosomal protein L44, putative OS=Leishmania_mexicana_MHOM/GT/2001/U1103 GN=LmxM.13.1670	LmxM.13.1670	1	4.94085e-69	212.78	2	QSGYGGQTKPVFHK(1)K	-0.82606	250140	282990	268390	72488	0	71675	0	0	0	247740	265980	255520	0	41111	0	0	0	0	1.46725	1.56295	1.53012	0.205641		0.221441				0.997845	1.08884	1.0412		0.234747
LmxM.13.1670	78	K	1.79803	0.000111811	Up	60S ribosomal protein L44, putative OS=Leishmania_mexicana_MHOM/GT/2001/U1103 GN=LmxM.13.1670	LmxM.13.1670	1	4.69861e-06	133.76	2	LQCSGCK(1)SIR	0.20101	611640	619360	609810	651380	655460	614930	0	0	0	599070	586270	602290	208360	0	201990	0	0	0	1.29185	1.23173	1.25184	0.665387	0.75028	0.684088				0.868841	0.864187	0.88371	0.404171		0.41739
LmxM.13.1670	24	K	3.97388	9.3156e-05	Up	60S ribosomal protein L44, putative OS=Leishmania_mexicana_MHOM/GT/2001/U1103 GN=LmxM.13.1670	LmxM.13.1670	1	0.000138015	118.06	2	SFK(1)VVQYK	0.51247	446920	458610	451020	263280	270280	278700	59935	57434	52622	447480	436250	424060	93163	82788	80001	36631	35793	36977	2.29487	2.21731	2.25094	0.653838	0.752148	0.753763	0.433874	0.431998	0.378164	1.57779	1.56336	1.51267	0.439346	0.413826	0.401902	0.262982	0.258713	0.271497
LmxM.13.1670	89	K	7.33454	4.57072e-06	Up	60S ribosomal protein L44, putative OS=Leishmania_mexicana_MHOM/GT/2001/U1103 GN=LmxM.13.1670	LmxM.13.1670	1	2.07244e-05	163.43	2	TK(1)HFELNDK	1.9117	493910	455350	474390	96585	107530	112170	59007	0	47999	343620	359970	358460	0	0	64453	0	38775	0	2.43958	2.11771	2.27742	0.230728	0.287845	0.291819	0.410891		0.331806	1.16545	1.24087	1.22997			0.311463		0.269595
LmxM.13.1680	26	K	5.32	1.29472e-06	Up	pyrroline-5-carboxylate reductase OS=Leishmania_mexicana_MHOM/GT/2001/U1103 GN=LmxM.13.1680	LmxM.13.1680	1	7.73811e-75	183	2	AK(1)TLGPENTFICNR	-2.3475	484330	478800	496370	0	101430	96097	0	108090	0	290930	304710	288110	75629	69469	83754	74046	0	77354	2.24885	2.28403	2.45311		0.459105	0.427067		0.426983		1.45686	1.61702	1.48717	0.386579	0.363557	0.439886	0.333124		0.342112
LmxM.13.1680	156	K	11.5398	5.08818e-05	Up	pyrroline-5-carboxylate reductase OS=Leishmania_mexicana_MHOM/GT/2001/U1103 GN=LmxM.13.1680	LmxM.13.1680	1	2.73067e-05	134.66	2	LFDAIGK(1)TYR	1.582	614570	595510	612400	0	71165	0	55573	55204	0	341710	338380	341990	0	0	0	0	43009	0	2.01145	2.00242	2.13337		0.227055		0.15193	0.153714		1.20616	1.26576	1.24433					0.137289
LmxM.14.0130	317	K	1.64402	0.00203926	Up	nucleoside hydrolase-like protein OS=Leishmania_mexicana_MHOM/GT/2001/U1103 GN=LmxM.14.0130	LmxM.14.0130	1	3.02766e-11	119.79	2	GQTCLDWYGTK(1)QSMAK	-3.0053	172840	175140	174960	102850	134380	140340	113970	0	0	122310	127010	129280	0	63223	66074	37617	0	38821	1.5722	1.58587	1.5674	0.768975	1.00071	1.06896	0.993799			1.23139	1.27523	1.30376		0.550489	0.587991	0.328328		0.322569
LmxM.14.0190	142	K	8.47819	4.16885e-05	Up	Thioredoxin-like, putative OS=Leishmania_mexicana_MHOM/GT/2001/U1103 GN=LmxM.14.0190	LmxM.14.0190	1	0.00591484	92.319	2	NGK(1)IAWR	0.3046	140560	118680	130020	15562	0	10840	0	0	14300	88460	91840	93383	0	13200	16899	0	7249.1	0	2.23699	1.98708	2.09702	0.293521		0.203881			0.248168	1.4051	1.47574	1.51513		0.224294	0.28814		0.095983
LmxM.14.0190	29	K	8.12886	2.94958e-05	Up	Thioredoxin-like, putative OS=Leishmania_mexicana_MHOM/GT/2001/U1103 GN=LmxM.14.0190	LmxM.14.0190	1	1.43396e-22	133.07	2	VAPAIESAHPIK(1)GEK	-2.4545	135250	85026	81306	0	7348.9	8830.1	14185	14248	12297	60774	65960	67585	8911.7	13571	10739	10344	13073	11534	3.63866	2.40653	2.21675		0.232958	0.280747	0.407244	0.41225	0.360754	1.63186	1.79168	1.85368	0.256388	0.389815	0.309535	0.227798	0.292609	0.252826
LmxM.14.0210	320	K	17.9722	0.000285372	Up	Domain of unknown function (DUF4201), putative OS=Leishmania_mexicana_MHOM/GT/2001/U1103 GN=LmxM.14.0210	LmxM.14.0210	1	7.21052e-06	104.04	3	NK(1)VTNTIHIATHVR	1.1235	250300	199510	173250	10671	0	11017	0	0	0	112030	88107	101600	0	0	0	0	0	0	1.93417	1.5075	1.31921	0.0861159		0.0904861				1.01052	0.772495	0.957838
LmxM.14.0290	132	K	11.4119	0.0210708	Up	hypothetical protein, conserved OS=Leishmania_mexicana_MHOM/GT/2001/U1103 GN=LmxM.14.0290	LmxM.14.0290	1	0.00432134	76.605	2	ILGSK(1)HLLK	0.56515	131610	0	114300	13714	0	0	0	0	13572	0	67882	71077	0	0	19322	0	0	0	2.61466		2.22317	0.211357					0.212571		1.40433	1.41728			0.261664
LmxM.14.0310	241	K	7.98727	4.58524e-05	Up	proteasome alpha 3 subunit, putative OS=Leishmania_mexicana_MHOM/GT/2001/U1103 GN=LmxM.14.0310	LmxM.14.0310	1	1.33913e-59	184.37	4	HHPK(1)TTPQFQILALSELKPHAER	-0.9096	740770	603720	562890	75879	70836	72041	0	0	0	347710	469400	406450	91251	102290	0	0	65502	80582	2.77598	2.14146	1.92566	0.288911	0.279679	0.288161				1.27666	1.77921	1.55978	0.322171	0.357779			0.197924	0.238063
LmxM.14.0650	57	K	3.18258	5.67295e-07	Up	fatty acid elongase, putative OS=Leishmania_mexicana_MHOM/GT/2001/U1103 GN=LmxM.14.0650	LmxM.14.0650	1	3.48036e-181	211.15	2	YLNLPANAK(1)SSALVPVINK	-0.4697	679660	805340	803540	298230	331190	332950	0	300800	292270	654600	722150	672880	383930	365680	413200	275490	283360	259980	1.91309	2.12043	2.22689	0.626231	0.696841	0.709769		0.605691	0.63995	1.38752	1.55935	1.46385	0.951747	0.919475	1.04371	0.478223	0.474155	0.433204
LmxM.14.0660	95	K	3.01205	8.34766e-05	Up	fatty acid elongase, putative OS=Leishmania_mexicana_MHOM/GT/2001/U1103 GN=LmxM.14.0660	LmxM.14.0660	1	2.45478e-08	94.791	2	NLHQYGQK(1)DALCR	-0.018856	68184	41127	43877	25700	22685	27415	29093	30977	29318	32076	25280	34422	0	12973	0	33406	30867	35265	3.22248	2.08138	2.23527	0.93404	0.86954	1.06032	0.698834	0.737516	0.705726	1.43883	1.22892	1.59031		0.661749		0.503325	0.471517	0.525931
LmxM.14.0850	74	K	6.66889	2.11379e-09	Up	small myristoylated protein-3, putative OS=Leishmania_mexicana_MHOM/GT/2001/U1103 GN=LmxM.14.0850	LmxM.14.0850	1	2.28376e-181	258.79	2	IEAIGNTTMQK(1)DEESGEFK	-1.4123	777970	785330	785160	83341	81955	78993	80867	88100	90532	507700	521980	511230	104490	100820	103080	97287	94917	97551	2.521	2.48274	2.53604	0.407017	0.413552	0.378269	0.33155	0.356581	0.37421	2.13652	2.11653	2.12586	0.395079	0.369369	0.385965	0.241101	0.252006	0.242221
LmxM.14.0850	114	K	8.41799	6.95085e-14	Up	small myristoylated protein-3, putative OS=Leishmania_mexicana_MHOM/GT/2001/U1103 GN=LmxM.14.0850	LmxM.14.0850	1	6.32351e-05	108.93	2	ISFEANPIAK(1)A	0.28555	1587700	1664400	1613900	122680	121190	129190	153380	153010	153270	971920	1022300	965090	171960	0	161740	146530	146060	151910	2.57022	2.62862	2.60416	0.299309	0.305501	0.309053	0.314151	0.309381	0.316491	2.04326	2.07081	2.00483	0.324809		0.30254	0.181411	0.193727	0.188433
LmxM.14.0960	912	K	5.33773	5.29816e-06	Up	RNA editing 3' terminal uridylyl transferase 1 OS=Leishmania_mexicana_MHOM/GT/2001/U1103 GN=LmxM.14.0960	LmxM.14.0960	1	1.8488e-11	117.99	3	LATQVWNK(1)HQLLHR	-0.86152	218090	185870	179120	33010	25533	31388	42276	38072	41699	112930	107180	111830	46989	44747	49095	27384	29054	30826	2.6532	2.35234	2.40765	0.394827	0.312377	0.377232	0.591608	0.510792	0.590823	1.43359	1.42149	1.43252	0.614056	0.59836	0.640981	0.431446	0.45182	0.463915
LmxM.14.0970	139	K	1.60732	0.000929414	Up	hypothetical protein, conserved OS=Leishmania_mexicana_MHOM/GT/2001/U1103 GN=LmxM.14.0970	LmxM.14.0970	1	9.56542e-11	92.707	2	ELLAMPNAQEAVK(1)R	-2.293	94772	85886	85146	0	57926	0	0	55461	58406	74001	65889	75713	41291	36092	38628	29199	0	29799	1.67671	1.57736	1.51557		1.0792			0.929012	0.95924	1.27683	1.16761	1.33371	0.732233	0.641251	0.694062	0.39627		0.420525
LmxM.14.0970	59	K	25.0057	8.96092e-05	Up	hypothetical protein, conserved OS=Leishmania_mexicana_MHOM/GT/2001/U1103 GN=LmxM.14.0970	LmxM.14.0970	1	1.0439e-80	159.83	3	VLVAVAGRPGSGK(1)STMVALLADAVR	-1.1437	409170	500330	499220	0	0	0	21278	0	19039	236950	309990	318600	24435	21788	0	11707	11786	0	2.15533	2.73589	2.64568				0.107839		0.0930995	1.21726	1.63556	1.67098	0.129015	0.115257		0.0473045	0.0484887
LmxM.14.0990	250	K	10.8792	2.79793e-07	Up	ADP/ATP mitochondrial carrier-like protein OS=Leishmania_mexicana_MHOM/GT/2001/U1103 GN=LmxM.14.0990	LmxM.14.0990	1	0.00122194	93.561	2	K(1)GWGGFYR	1.5647	119890	125700	130600	13213	13445	15176	0	0	0	91672	97939	93405	9870.4	11818	0	0	0	0	2.18388	2.16685	2.12073	0.197396	0.187055	0.210399				1.44385	1.54671	1.48283	0.16769	0.188485
LmxM.14.1020	191	K	6.96018	6.19818e-05	Up	hypothetical protein, conserved OS=Leishmania_mexicana_MHOM/GT/2001/U1103 GN=LmxM.14.1020	LmxM.14.1020	1	0.000106967	116.13	2	TGPVK(1)HDYPK	1.9845	274450	255720	286230	0	0	0	44687	41938	0	131830	147330	171590	0	0	49542	0	0	0	1.80376	1.65139	1.9234				0.262773	0.2524		1.02854	1.15061	1.29486			0.274541
LmxM.14.1140	66	K	9.8058	1.14048e-05	Up	hypothetical protein, conserved OS=Leishmania_mexicana_MHOM/GT/2001/U1103 GN=LmxM.14.1140	LmxM.14.1140	1	9.51288e-50	191.67	2	LHGTVTAFK(1)HR	0.56018	263140	212190	222450	27089	24753	23963	0	0	33673	154910	160600	163980	43631	45722	45440	30912	35484	33832	3.73392	2.38959	2.59509	0.295692	0.259584	0.29549			0.334736	1.43382	1.45701	1.64106	0.484565	0.510244	0.50699	0.294508	0.312568	0.31402
LmxM.14.1160	172	K	2.07086	0.00244732	Up	enolase OS=Leishmania_mexicana_MHOM/GT/2001/U1103 GN=LmxM.14.1160	LmxM.14.1160	1	1.40247e-34	125.52	3	HAGNVLPFQEFMIAPTK(1)ATSFR	-0.80056	276560	256320	228370	60066	78044	78186	161500	0	122840	172100	189700	162240	142000	95157	101000	246580	257140	250960	1.76304	1.61413	1.4648	0.557063	0.722324	0.71067	1.08194		0.824908	1.07514	1.17947	1.02236	0.871219	0.581383	0.620471	0.880091	0.924329	0.9179
LmxM.14.1160	118	K	2.34288	6.67484e-06	Up	enolase OS=Leishmania_mexicana_MHOM/GT/2001/U1103 GN=LmxM.14.1160	LmxM.14.1160	1	8.72304e-29	132.01	2	LGANAILGCSMAISK(1)AAAAK	-1.0022	406630	382940	371260	121040	0	0	157270	145900	158530	322120	394820	344880	258170	220070	230570	268600	303370	304380	1.59967	1.48815	1.46952	0.692727			0.650184	0.593716	0.656955	1.24182	1.51488	1.34113	0.977469	0.829737	0.874099	0.591608	0.672958	0.687013
LmxM.14.1160	334	K	2.67412	4.19518e-05	Up	enolase OS=Leishmania_mexicana_MHOM/GT/2001/U1103 GN=LmxM.14.1160	LmxM.14.1160	1	1.88214e-50	156.73	2	MAIEK(1)SACNSLLLK	-2.8219	434650	406280	426750	115280	105120	151560	135370	130730	125750	387390	414930	382410	168030	192500	202650	200530	236320	265360	1.88455	1.74011	1.86169	0.727151	0.661718	0.936956	0.616808	0.586322	0.57434	1.64599	1.75465	1.63896	0.701167	0.799923	0.846724	0.486793	0.577767	0.660118
LmxM.14.1160	139	K	2.12895	0.00108074	Up	enolase OS=Leishmania_mexicana_MHOM/GT/2001/U1103 GN=LmxM.14.1160	LmxM.14.1160	1	3.6857e-06	90.142	2	YIAALAGTK(1)DIR	-0.53811	119550	103090	125330	0	35494	26970	59962	61261	52843	122000	125910	113440	75758	0	63532	91256	76193	90962	1.5369	1.30917	1.62112		0.662476	0.49436	0.810086	0.814652	0.71561	1.53697	1.57872	1.44156	0.937325		0.787073	0.656831	0.552325	0.670924
LmxM.36.0600	142	K	9.59328	1.19632e-06	Up	ubiquitin/ribosomal protein S27a, putative OS=Leishmania_mexicana_MHOM/GT/2001/U1103 GN=LmxM.36.0600	LmxM.36.0600	1	6.13311e-76	220.17	2	QYCGK(1)CHLTYK	-0.12737	673730	643470	639390	100010	96053	96784	55493	55354	56721	448540	468650	476840	87399	82816	89943	30659	30735	34994	2.92525	2.89726	2.75583	0.359216	0.361477	0.35798	0.227775	0.23519	0.246768	1.84663	2.0301	2.08912	0.350092	0.353078	0.386426	0.173373	0.173969	0.186781
LmxM.36.0600	112	K	3.40573	6.39487e-07	Up	ubiquitin/ribosomal protein S27a, putative OS=Leishmania_mexicana_MHOM/GT/2001/U1103 GN=LmxM.36.0600	LmxM.36.0600	1	3.78818e-35	174.05	2	YFK(1)VTENDDGSYK(1)VER	1.8537	178290	165970	185550	55903	55630	56603	58135	65602	51998	124430	136500	131330	44211	42118	42256	24742	19695	25797	2.20253	2.12621	2.27543	0.5713	0.595656	0.595679	0.678927	0.793059	0.643648	1.45755	1.68236	1.63709	0.503876	0.510906	0.516541	0.398086	0.317184	0.391766
LmxM.36.0600	102	K	8.77356	2.94949e-07	Up	ubiquitin/ribosomal protein S27a, putative OS=Leishmania_mexicana_MHOM/GT/2001/U1103 GN=LmxM.36.0600	LmxM.36.0600	1	6.33544e-24	162.21	2	YFK(1)VTENDDGSYK(1)VER	1.8537	245100	253630	262740	35900	38146	31425	0	27923	0	181850	180380	183010	29514	26457	25365	0	0	0	2.10533	2.25923	2.24033	0.255098	0.284	0.229948		0.234711		1.48113	1.54581	1.58623	0.233886	0.22315	0.215592
LmxM.14.1320	238	K	5.58086	3.74821e-09	Up	serine hydroxymethyltransferase, putative OS=Leishmania_mexicana_MHOM/GT/2001/U1103 GN=LmxM.14.1320	LmxM.14.1320	1	1.24928e-69	162	2	SPFPYADVVTTTTHK(1)SLR	-1.337	924460	827630	836690	269730	270920	287250	183190	183640	212200	720990	751270	721790	134810	125110	125660	104270	100040	125770	3.41099	2.95286	2.98074	0.546162	0.547434	0.589073	0.52517	0.526603	0.614361	2.13499	2.23814	2.17557	0.388378	0.360354	0.359361	0.212702	0.198031	0.246809
LmxM.14.1360	356	K	2.33376	0.00282892	Up	myo-inositol-1-phosphate synthase OS=Leishmania_mexicana_MHOM/GT/2001/U1103 GN=LmxM.14.1360	LmxM.14.1360	1	1.60165e-17	124.06	2	EITK(1)SNVVDDMIK	-0.53669	203270	180190	0	47941	62020	0	0	58446	56874	171670	185810	177500	64388	74215	0	0	107250	116900	2.09138	1.88602		0.857745	1.06368			0.754727	0.732432	1.54791	1.66218	1.5882	0.729808	0.840865			0.409977	0.444665
LmxM.14.1440	270	K	1.94491	0.00901854	Up	cytoskeleton associated protein, putative OS=Leishmania_mexicana_MHOM/GT/2001/U1103 GN=LmxM.14.1440	LmxM.14.1440	1	1.56485e-05	78.816	2	AHK(1)GGVLCVLR	-2.6447	131580	0	111540	0	36620	34703	35536	0	42670	87369	89193	86304	0	0	45845	39845	43952	49220	1.77478		1.46104		0.984043	0.889606	0.660168		0.793654	1.20477	1.21331	1.20293			0.806058	0.459345	0.501481	0.572723
LmxM.14.1440	364	K	1.56328	0.000925008	Up	cytoskeleton associated protein, putative OS=Leishmania_mexicana_MHOM/GT/2001/U1103 GN=LmxM.14.1440	LmxM.14.1440	1	4.16903e-08	110.58	2	LYNK(1)GNAVLLIESK	-1.4761	87559	87392	87238	0	0	0	41925	37467	40996	64394	0	65072	30515	0	26989	0	0	24351	1.40396	1.33933	1.35843				0.925889	0.791439	0.906463	1.05558		1.07821	0.635366		0.564106			0.336837
LmxM.14.1480	124	K	3.00164	0.00047661	Up	glutathione-S-transferase/glutaredoxin, putative OS=Leishmania_mexicana_MHOM/GT/2001/U1103 GN=LmxM.14.1480	LmxM.14.1480	1	0.00989873	67.903	2	FESK(1)AGAR	-1.2441	0	49309	53714	20736	23912	23157	0	0	0	0	47123	49076	0	0	0	0	0	0		1.44472	1.56659	0.458427	0.534623	0.511781					1.10412	1.13062
LmxM.14.1480	255	K	3.89651	0.000261229	Up	glutathione-S-transferase/glutaredoxin, putative OS=Leishmania_mexicana_MHOM/GT/2001/U1103 GN=LmxM.14.1480	LmxM.14.1480	1	1.70281e-05	106	2	FTAEALVDPK(1)SK	0.83646	169780	168100	157100	0	59864	52333	0	0	0	133080	116610	0	0	0	0	0	34062	0	1.7386	1.68705	1.56945		0.45846	0.39617				1.05167	0.935888						0.404345
LmxM.14.1480	65	K	5.94158	5.09768e-07	Up	glutathione-S-transferase/glutaredoxin, putative OS=Leishmania_mexicana_MHOM/GT/2001/U1103 GN=LmxM.14.1480	LmxM.14.1480	1	2.35582e-07	86.243	2	LSDPK(1)EHPLIQFYR	-0.20738	257810	246940	253990	65884	0	62012	46849	49232	42297	205070	215160	196080	0	0	0	0	0	0	1.97045	1.84971	1.89382	0.372375		0.350375	0.301031	0.312922	0.266121	1.20955	1.28885	1.15488
LmxM.36.0020	77	K	7.62488	9.30988e-08	Up	histone H4 OS=Leishmania_mexicana_MHOM/GT/2001/U1103 GN=LmxM.36.0020	LmxM.36.0020	1	1.5629e-22	168.05	2	K(1)K(1)TVTASDVVNALR	-3.2446	370970	313420	262440	53769	50594	51008	48287	49941	51506	196180	197020	189940	36177	39405	41068	35174	39080	55309	3.70877	3.30321	2.61609	0.479586	0.455146	0.436704	0.367476	0.386857	0.399665	2.13004	2.17571	2.05014	0.331755	0.370409	0.38372	0.228023	0.257942	0.361277
LmxM.36.0020	78	K	7.62488	9.30988e-08	Up	histone H4 OS=Leishmania_mexicana_MHOM/GT/2001/U1103 GN=LmxM.36.0020	LmxM.36.0020	1	4.20644e-87	215.93	2	K(1)K(1)TVTASDVVNALR	-3.2446	370970	313420	262440	53769	50594	51008	48287	49941	51506	196180	197020	189940	36177	39405	41068	35174	39080	55309	3.70877	3.30321	2.61609	0.479586	0.455146	0.436704	0.367476	0.386857	0.399665	2.13004	2.17571	2.05014	0.331755	0.370409	0.38372	0.228023	0.257942	0.361277
LmxM.15.0040	30	K	2.50334	8.28578e-05	Up	Possible lysine decarboxylase, putative OS=Leishmania_mexicana_MHOM/GT/2001/U1103 GN=LmxM.15.0040	LmxM.15.0040	1	0.00132709	121.8	2	LTPTVK(1)SYR	-0.87398	91359	85303	81870	40392	36305	34692	0	0	0	64413	68126	68075	0	19375	0	0	0	0	1.57523	1.41493	1.45896	0.643845	0.584646	0.54878				1.0038	1.08327	1.09378		0.33388
LmxM.15.0040	170	K	6.8392	0.000207955	Up	Possible lysine decarboxylase, putative OS=Leishmania_mexicana_MHOM/GT/2001/U1103 GN=LmxM.15.0040	LmxM.15.0040	1	3.55301e-80	178.52	2	LTPEDGSESLDDLQK(1)R	3.2242	800420	764490	769270	109640	0	137180	0	0	0	426680	438100	423360	0	0	0	0	0	0	1.68334	1.54669	1.67208	0.213165		0.26468				0.811034	0.849684	0.829687
LmxM.15.0090	109	K	4.77745	2.95731e-07	Up	ATP-dependent protease ATPase subunit HslU1, putative OS=Leishmania_mexicana_MHOM/GT/2001/U1103 GN=LmxM.15.0090	LmxM.15.0090	1	5.6504e-30	175.07	2	ASLSQTK(1)QNIR	-3.0745	761380	654010	686130	134690	140580	130190	151480	149450	0	467940	461420	483550	172820	189260	162940	88827	88203	111220	2.47909	2.15656	2.19069	0.451118	0.481437	0.417389	0.505465	0.526038		1.44936	1.45667	1.61449	0.57137	0.615912	0.535215	0.322013	0.335761	0.448371
LmxM.15.0090	406	K	7.0004	0.000623236	Up	ATP-dependent protease ATPase subunit HslU1, putative OS=Leishmania_mexicana_MHOM/GT/2001/U1103 GN=LmxM.15.0090	LmxM.15.0090	1	0.000666752	81.163	2	FVIDAAYVK(1)K	-0.91491	359260	334840	333740	0	30689	0	0	59701	45375	226230	220240	234180	49575	0	48923	19074	0	20545	2.27159	2.1441	2.06925		0.204094			0.408069	0.314206	1.36072	1.35018	1.51836	0.318285		0.312064	0.134277		0.160839
LmxM.15.0200	49	K	13.7338	0.000160232	Up	60S ribosomal protein L13a, putative OS=Leishmania_mexicana_MHOM/GT/2001/U1103 GN=LmxM.15.0200	LmxM.15.0200	1	1.35828e-32	120.65	2	QLLLGK(1)K	0.034573	579430	236780	571980	55251	54095	49181	0	0	36100	76572	93003	308640	0	42557	41116	0	0	0	3.71105	1.5019	3.56559	0.236279	0.21038	0.196287			0.209308	0.384598	0.469312	1.56994		0.252022	0.235336
LmxM.15.0200	217	K	4.2349	0.00603851	Up	60S ribosomal protein L13a, putative OS=Leishmania_mexicana_MHOM/GT/2001/U1103 GN=LmxM.15.0200	LmxM.15.0200	1	0.000223145	122.44	2	HNVEVLK(1)K	0.43717	0	271740	284220	130210	126150	136000	41248	42804	0	262750	272330	271290	66390	0	63659	12151	14552	0		2.16129	2.22162	0.698221	0.615173	0.680609	0.289614	0.303754		1.65479	1.72315	1.73033	0.469729		0.456879	0.129863	0.155265
LmxM.15.0200	30	K	45.2101	3.87354e-11	Up	60S ribosomal protein L13a, putative OS=Leishmania_mexicana_MHOM/GT/2001/U1103 GN=LmxM.15.0200	LmxM.15.0200	1	1.0705e-93	196.42	4	RHRPEIIVIDLK(1)DHVLGR	-0.26741	4161500	3671400	3704300	144540	138140	122690	93045	96678	89276	1221700	2656300	2105100	159460	122060	140620	78568	115920	105840	4.53022	3.95823	3.92492	0.105062	0.0913145	0.0832296	0.0885562	0.0929984	0.0879807	1.04298	2.27833	1.82002	0.152935	0.122861	0.136804	0.113823	0.167656	0.144997
LmxM.15.0200	71	K	12.3574	4.11104e-12	Up	60S ribosomal protein L13a, putative OS=Leishmania_mexicana_MHOM/GT/2001/U1103 GN=LmxM.15.0200	LmxM.15.0200	1	4.25971e-05	130	2	NK(1)IK(1)YLQYLR	-0.024507	1453000	1381300	1395300	180060	177410	184280	125910	125930	123960	967640	948590	955810	161900	158840	156460	68753	73791	72697	3.43654	3.23551	3.21201	0.284355	0.254791	0.271602	0.260358	0.263186	0.265411	1.79478	1.76768	1.7954	0.337355	0.347366	0.330704	0.216401	0.231873	0.216377
LmxM.15.0200	210	K	9.75001	1.20833e-06	Up	60S ribosomal protein L13a, putative OS=Leishmania_mexicana_MHOM/GT/2001/U1103 GN=LmxM.15.0200	LmxM.15.0200	1	7.74775e-05	126.29	2	MPK(1)HNVEVLK	3.0981	1133000	974180	962080	216800	219080	188990	84868	85946	84720	826330	846480	856860	0	143890	133680	0	40819	36464	3.0363	2.58556	2.50946	0.387939	0.356507	0.315612	0.198845	0.203526	0.205534	1.73664	1.78731	1.82373		0.356548	0.320157		0.145335	0.122976
LmxM.15.0200	162	K	1.76396	0.000385579	Up	60S ribosomal protein L13a, putative OS=Leishmania_mexicana_MHOM/GT/2001/U1103 GN=LmxM.15.0200	LmxM.15.0200	1	1.00637e-33	174.02	3	SERPYTVLGNMCK(1)HVGWK	-0.070836	431910	384420	388870	353380	352570	361400	0	0	0	398220	399860	392330	139060	138480	138960	53383	53362	60887	1.83241	1.61524	1.60579	1.00106	0.908294	0.95547				1.32494	1.33662	1.32195	0.519778	0.543237	0.526868	0.301402	0.300784	0.325083
LmxM.15.0230	229	K	7.70487	6.94926e-10	Up	lysyl-tRNA synthetase, putative OS=Leishmania_mexicana_MHOM/GT/2001/U1103 GN=LmxM.15.0230	LmxM.15.0230	1	2.18377e-07	162.59	2	DNIK(1)TFIQR	0.49526	338810	323260	315890	44123	46208	42366	35145	37111	36979	192240	193180	198180	52898	48789	52572	25088	22728	0	2.62193	2.54311	2.44487	0.344558	0.365513	0.32883	0.295336	0.317684	0.323432	1.42156	1.44548	1.48861	0.416687	0.387051	0.421144	0.337861	0.299158
LmxM.15.0230	420	K	1.92613	0.000153766	Up	lysyl-tRNA synthetase, putative OS=Leishmania_mexicana_MHOM/GT/2001/U1103 GN=LmxM.15.0230	LmxM.15.0230	1	7.52305e-07	102.57	2	HK(1)ADCPPPYTAPR	0.42337	214050	234940	238890	125170	125730	133930	92152	98897	0	209430	206790	205890	112060	105760	114270	22779	0	0	1.30818	1.45968	1.46018	0.771945	0.785439	0.820957	0.61157	0.668597		1.22306	1.22199	1.22136	0.697123	0.662607	0.72293	0.242267
LmxM.15.0230	392	K	4.51222	0.000136318	Up	lysyl-tRNA synthetase, putative OS=Leishmania_mexicana_MHOM/GT/2001/U1103 GN=LmxM.15.0230	LmxM.15.0230	1	0.000603155	95.311	2	LHIIPELEK(1)R	0.23234	186000	148460	137050	0	0	37009	33612	0	27807	108530	98589	104540	0	0	38107	0	0	0	1.84637	1.49818	1.36063			0.368469	0.362316		0.311977	1.02946	0.94628	1.00727			0.39158
LmxM.15.0270	85	K	18.3407	2.85635e-09	Up	replication Factor A 28 kDa subunit, putative OS=Leishmania_mexicana_MHOM/GT/2001/U1103 GN=LmxM.15.0270	LmxM.15.0270	1	7.80531e-117	220.43	3	VVGYENANMASGGGAITAK(1)HFGYR	0.60296	879470	881500	944390	60680	61825	62427	53674	0	56303	644790	661460	621700	0	54025	54986	24590	27276	29991	3.03496	2.93773	3.39941	0.157959	0.165057	0.163848	0.17399		0.190811	1.83097	1.88053	1.73505		0.180745	0.182253	0.0832437	0.0922272	0.102586
LmxM.15.0275	111	K	2.87792	0.0026808	Up	ribonucleoprotein p18, mitochondrial precursor, putative OS=Leishmania_mexicana_MHOM/GT/2001/U1103 GN=LmxM.15.0275	LmxM.15.0275	0.999758	2.03865e-21	106.97	2	NK(1)VKPNEESWTWVLK	-1.3026	403710	407390	424810	114220	0	0	182730	0	196270	363400	372940	387630	0	171530	173500	0	0	0	1.53477	1.47935	1.52815	0.374129			0.560691		0.643497	1.34504	1.39879	1.42347		0.560137	0.574149
LmxM.15.0275	113	K	3.9021	2.10613e-05	Up	ribonucleoprotein p18, mitochondrial precursor, putative OS=Leishmania_mexicana_MHOM/GT/2001/U1103 GN=LmxM.15.0275	LmxM.15.0275	1	1.98485e-11	97.594	2	VK(1)PNEESWTWVLK	-1.1571	737730	743360	736020	0	0	165600	240420	228660	228550	556570	568390	582520	305880	295600	298640	186340	200250	194350	2.08116	2.00305	1.9647			0.410384	0.547416	0.55305	0.556041	1.52864	1.58195	1.58736	0.73133	0.716295	0.733342	0.479949	0.537823	0.514463
LmxM.15.0390	369	K	1.70571	5.82556e-05	Up	cytoplasmic l-asparaginase i-like protein OS=Leishmania_mexicana_MHOM/GT/2001/U1103 GN=LmxM.15.0390	LmxM.15.0390	1	5.10471e-06	76.255	2	LMYLFGK(1)GLSPAK	-0.9827	44756	47071	44640	27431	27814	26912	0	29228	0	29562	29318	30391	0	12097	12355	0	0	0	1.41658	1.44203	1.40235	0.808282	0.848254	0.766867		0.907338		1.01408	0.999308	1.04069		0.418486	0.410132
LmxM.15.0540	241	K	9.39617	6.3922e-05	Up	Distal docking complex protein 1 OS=Leishmania_mexicana_MHOM/GT/2001/U1103 GN=LmxM.15.0540	LmxM.15.0540	1	0.00278098	93.467	2	K(1)HEALLLK	0.30966	255400	229220	221100	20990	19599	0	0	0	0	119130	112590	117170	23134	0	24837	0	0	7935	2.09456	1.89709	1.75675	0.209521	0.198333					1.17977	1.12328	1.13017	0.197973		0.213829			0.0955725
LmxM.15.0810	104	K	14.111	0.000134971	Up	peroxisomal membrane protein (Pex16), putative OS=Leishmania_mexicana_MHOM/GT/2001/U1103 GN=LmxM.15.0810	LmxM.15.0810	1	3.64847e-44	188.6	2	TTK(1)TELLSLVLR	-1.418	114870	155330	171640	15485	13026	8403.6	0	0	17007	62880	82148	81603	14984	0	0	0	0	3768.3	2.20972	2.96581	3.11546	0.20819	0.173288	0.110089			0.29184	0.971561	1.19151	1.20381	0.215934					0.0736648
LmxM.15.0930	49	K	51.9833	1.18492e-06	Up	calmodulin-like protein OS=Leishmania_mexicana_MHOM/GT/2001/U1103 GN=LmxM.15.0930	LmxM.15.0930	1	1.8679e-187	329.7	3	HTGLVSHIDLK(1)HILR	-2.1003	2020800	1592900	1529600	54708	32525	37604	18160	29111	36224	755680	1281100	1105000	29493	0	34302	43247	39776	51078	3.9805	3.22567	3.17301	0.111151	0.0664601	0.0725324	0.0301307	0.0525304	0.0665227	1.54257	2.62681	2.17164	0.0597489		0.0714028	0.0745106	0.0787976	0.103027
LmxM.15.0950	158	K	3.40675	1.03593e-06	Up	40S ribosomal protein S3, putative OS=Leishmania_mexicana_MHOM/GT/2001/U1103 GN=LmxM.15.0950	LmxM.15.0950	1	8.53605e-27	181.87	2	DGYMIK(1)SGTAHK	3.1142	1907600	1703300	1686900	543100	538350	539110	398620	401600	412030	1214700	1227100	1236900	434050	432860	448930	282340	288150	305310	2.09643	1.85952	1.81721	0.659315	0.643628	0.628793	0.489946	0.466227	0.501337	1.57031	1.48366	1.52966	0.656638	0.639463	0.654891	0.459793	0.477245	0.524717
LmxM.15.0950	164	K	4.61915	1.04291e-06	Up	40S ribosomal protein S3, putative OS=Leishmania_mexicana_MHOM/GT/2001/U1103 GN=LmxM.15.0950	LmxM.15.0950	1	2.30474e-119	237.27	2	SGTAHK(1)SFVDSACR	-0.5245	1996500	1784000	1884500	445110	431990	442410	299430	305700	309450	1143700	1209500	1180000	352270	340910	333610	172180	179430	192930	2.36241	2.09699	2.18578	0.5818	0.55608	0.555582	0.396258	0.382113	0.405401	1.59192	1.57454	1.57121	0.573793	0.542252	0.52399	0.301902	0.319971	0.357007
LmxM.15.0950	107	K	2.32809	1.69249e-06	Up	40S ribosomal protein S3, putative OS=Leishmania_mexicana_MHOM/GT/2001/U1103 GN=LmxM.15.0950	LmxM.15.0950	1	1.35256e-08	123.5	2	FK(1)LLSNLQVR	-1.5168	322980	333520	308660	129730	129580	113950	126650	130780	0	190210	264350	223870	127240	105440	118550	53408	49418	47092	1.69111	1.73474	1.58417	0.750339	0.738095	0.633211	0.741649	0.723351		1.17153	1.52278	1.31905	0.917094	0.742125	0.823941	0.414382	0.389953	0.385598
LmxM.15.0970	96	K	10.8951	0.0312688	Up	NAD/FAD dependent dehydrogenase, putative OS=Leishmania_mexicana_MHOM/GT/2001/U1103 GN=LmxM.15.0970	LmxM.15.0970	1	8.59446e-17	114.5	3	LFYRPEQQGMTK(1)VEAAK	0.29347	207410	207850	203870	19170	0	23646	0	0	0	115010	112260	112920	0	22553	15701	0	0	0	2.08207	1.94853	2.00078	0.160488		0.208571				1.13443	1.14497	1.16109		0.224252	0.150561
LmxM.15.0990	42	K	8.12625	3.89289e-10	Up	succinate dehydrogenase, putative OS=Leishmania_mexicana_MHOM/GT/2001/U1103 GN=LmxM.15.0990	LmxM.15.0990	1	4.23713e-27	176.97	2	DNSK(1)TAMHLLTR	0.80643	319220	303990	321450	51339	49730	51859	51214	47582	51519	168870	171730	170090	46795	46230	47398	22465	22638	0	3.04755	3.13197	3.1574	0.404759	0.392099	0.411148	0.383807	0.339569	0.366583	1.67648	1.64025	1.59661	0.423855	0.43548	0.440356	0.216061	0.201275
LmxM.15.0990	171	K	2.56442	0.000482779	Up	succinate dehydrogenase, putative OS=Leishmania_mexicana_MHOM/GT/2001/U1103 GN=LmxM.15.0990	LmxM.15.0990	1	0.00150426	90.308	2	LSSPSTK(1)R	-1.7728	99080	100540	107450	36123	0	40708	59661	69121	59867	0	71906	73745	45243	35734	38713	14955	18349	0	1.8625	2.03961	2.07813	0.560767		0.635482	0.880369	0.971283	0.838769		1.35231	1.36302	0.806899	0.66279	0.70819	0.283208	0.321229
LmxM.15.1000	114	K	7.7077	9.11972e-09	Up	60S ribosomal protein L6, putative OS=Leishmania_mexicana_MHOM/GT/2001/U1103 GN=LmxM.15.1000	LmxM.15.1000	1	2.57062e-48	207.06	2	AEKPTK(1)SEGDFMGDK	1.1119	2164100	1939000	1970900	300640	289570	307460	196610	199550	204460	1241600	1273400	1271700	252500	239940	249060	126120	123570	138290	2.86377	2.54322	2.58439	0.393621	0.37337	0.388983	0.303401	0.303527	0.310706	1.58427	1.63456	1.6204	0.369796	0.351455	0.360624	0.248951	0.245226	0.276433
LmxM.15.1000	164	K	12.6537	9.18457e-10	Up	60S ribosomal protein L6, putative OS=Leishmania_mexicana_MHOM/GT/2001/U1103 GN=LmxM.15.1000	LmxM.15.1000	1	2.42583e-20	177.47	2	K(1)IDAALIAAIK(1)K	-0.53718	608800	609560	612930	54856	54619	48188	39634	39920	36614	345360	446880	389720	45479	40624	45127	15856	15070	14240	2.9049	2.88284	2.89802	0.258972	0.253938	0.219825	0.220535	0.218944	0.200625	1.58897	2.06834	1.79055	0.240164	0.214559	0.235605	0.112855	0.107836	0.102638
LmxM.15.1000	29	K	2.92894	1.42707e-07	Up	60S ribosomal protein L6, putative OS=Leishmania_mexicana_MHOM/GT/2001/U1103 GN=LmxM.15.1000	LmxM.15.1000	1	1.34582e-58	177.41	2	K(1)SCAPGTIAIILAGR	-2.5019	205280	226940	225290	81206	78999	80566	54717	64543	64323	189210	209740	207720	66156	64460	63418	25182	25125	0	1.65763	1.81635	1.80268	0.648786	0.62157	0.621978	0.515248	0.599069	0.596471	1.47324	1.64285	1.61509	0.591224	0.576155	0.560332	0.303321	0.304257
LmxM.15.1010	916	K	3.66817	0.00147281	Up	glutamate dehydrogenase OS=Leishmania_mexicana_MHOM/GT/2001/U1103 GN=LmxM.15.1010	LmxM.15.1010	1	4.20009e-160	242.86	2	DPQQSK(1)TLIADALSR	-0.20769	370410	379860	344140	97399	167470	155570	0	0	0	208440	243520	204280	51090	58673	54408	24715	25387	32193	2.46951	2.53063	2.27891	0.462912	0.796147	0.725323				1.29276	1.50894	1.26376	0.340368	0.397613	0.36488	0.221509	0.224879	0.280626
LmxM.15.1010	443	K	5.63744	3.99999e-11	Up	glutamate dehydrogenase OS=Leishmania_mexicana_MHOM/GT/2001/U1103 GN=LmxM.15.1010	LmxM.15.1010	1	6.46126e-68	232.46	2	FNEVIIK(1)HNFCK	0.30067	750750	702610	763540	187820	191410	187920	151250	155820	155910	410320	417330	411300	128170	123940	129820	63103	63514	75818	2.8638	2.67817	2.89297	0.510747	0.520644	0.501301	0.473815	0.487374	0.498591	1.45606	1.47958	1.45586	0.488562	0.480567	0.498138	0.323594	0.321904	0.378145
LmxM.15.1010	350	K	2.84824	6.65034e-06	Up	glutamate dehydrogenase OS=Leishmania_mexicana_MHOM/GT/2001/U1103 GN=LmxM.15.1010	LmxM.15.1010	1	0.00284906	65.313	2	HLK(1)AILAK	-0.62264	52550	37061	39008	21123	21133	20978	16752	17257	20762	26187	24557	25560	17169	18215	0	0	0	0	2.20624	1.5548	1.62666	0.632195	0.632658	0.615916	0.577579	0.594068	0.730755	1.02276	0.958221	0.995756	0.720294	0.777326
LmxM.15.1010	699	K	3.69873	0.0136138	Up	glutamate dehydrogenase OS=Leishmania_mexicana_MHOM/GT/2001/U1103 GN=LmxM.15.1010	LmxM.15.1010	1	1.40803e-07	56.943	3	MVGMVDISASLHDPK(1)GIDREELAR	0.37892	165110	0	116350	0	42967	0	38731	0	61289	0	101380	77778	46501	0	0	0	0	0	2.18319		1.52809		0.405119		0.420574		0.679398		1.2459	0.954307	0.614422
LmxM.15.1010	883	K	9.05515	3.77165e-13	Up	glutamate dehydrogenase OS=Leishmania_mexicana_MHOM/GT/2001/U1103 GN=LmxM.15.1010	LmxM.15.1010	1	1.44808e-41	181.87	2	SATDAPEFYK(1)SYVK	0.63943	1159300	1181300	1148900	183100	186190	182820	154560	155690	146820	758780	749630	768520	127500	116330	120910	85561	87053	95082	3.02676	3.0819	2.97939	0.34079	0.34663	0.333798	0.331394	0.333299	0.321358	1.84292	1.81903	1.86187	0.332642	0.308722	0.317544	0.300303	0.301977	0.324578
LmxM.15.1010	529	K	4.12673	0.000302467	Up	glutamate dehydrogenase OS=Leishmania_mexicana_MHOM/GT/2001/U1103 GN=LmxM.15.1010	LmxM.15.1010	1	2.44743e-99	192.68	3	SVFQENYNLAHTQLLK(1)NK	-0.039859	113530	83627	81167	34698	30353	29911	0	0	0	54620	68888	55991	13308	19440	22985	0	0	0	2.40564	1.7707	1.7083	0.524133	0.458618	0.44323				1.07667	1.35667	1.10091	0.281786	0.418708	0.48992
LmxM.15.1010	873	K	3.82271	1.14143e-09	Up	glutamate dehydrogenase OS=Leishmania_mexicana_MHOM/GT/2001/U1103 GN=LmxM.15.1010	LmxM.15.1010	1	1.02838e-145	265.34	2	YMSAK(1)SATDAPEFYK	1.0578	878590	918280	947890	316910	335000	321440	301980	294050	302550	710390	725610	732480	243410	244130	252630	127900	128580	130070	2.14779	2.24314	2.30159	0.552277	0.583954	0.549519	0.606246	0.58941	0.620048	1.61552	1.64861	1.66155	0.594606	0.606626	0.621227	0.420318	0.417626	0.415739
LmxM.15.1010	1014	K	1.9707	4.02489e-05	Up	glutamate dehydrogenase OS=Leishmania_mexicana_MHOM/GT/2001/U1103 GN=LmxM.15.1010	LmxM.15.1010	1	9.13412e-17	105.94	2	YMTEVYATAAK(1)STK	-1.2812	39149	39422	46767	32977	28244	35056	25285	22838	22899	39184	40112	39852	17885	19078	17670	0	0	0	1.35285	1.36127	1.60521	0.812374	0.695959	0.847167	0.717558	0.64711	0.663389	1.25964	1.28829	1.27788	0.617594	0.670126	0.614222
LmxM.15.1010	956	K	4.47093	1.03737e-09	Up	glutamate dehydrogenase OS=Leishmania_mexicana_MHOM/GT/2001/U1103 GN=LmxM.15.1010	LmxM.15.1010	1	1.20022e-20	150.21	2	YVMDQYAPK(1)TLK	0.17676	527080	551610	529160	171390	169580	170280	149740	137490	0	393190	409270	413790	137400	125490	126480	73176	59877	69557	2.28447	2.38901	2.27804	0.529555	0.524098	0.51612	0.532982	0.488621		1.58534	1.64866	1.66419	0.595089	0.552858	0.551431	0.426364	0.344809	0.394175
LmxM.15.1040	108	K	6.21642	7.94487e-09	Up	tryparedoxin peroxidase OS=Leishmania_mexicana_MHOM/GT/2001/U1103 GN=LmxM.15.1040	LmxM.15.1040	1	1.88074e-53	148.82	2	K(1)GGLGTMAIPMLADK(1)TK	-0.13385	2823600	2946700	2600200	460940	471110	486890	463110	478870	468810	1622100	1584100	1522700	479050	443970	414160	275520	266400	297470	2.77628	2.83419	2.53488	0.4674	0.476239	0.472371	0.401511	0.403049	0.400022	1.81226	1.75493	1.71379	0.491989	0.460308	0.42586	0.279747	0.276192	0.310786
LmxM.15.1040	178	K	2.17402	0.000170471	Up	tryparedoxin peroxidase OS=Leishmania_mexicana_MHOM/GT/2001/U1103 GN=LmxM.15.1040	LmxM.15.1040	1	3.11134e-22	162.8	3	LLEAFQFVEK(1)HGEVCPANWK(1)K	-0.79693	611570	1056400	899670	374750	369090	377660	455560	455050	465630	738560	764850	751960	427120	423380	440940	239520	232650	242020	1.16737	1.97253	1.70269	0.737714	0.724331	0.711304	0.766763	0.743536	0.771312	1.60189	1.64496	1.64301	0.851583	0.852172	0.880198	0.472125	0.468255	0.490877
LmxM.15.1040	35	K	4.35732	4.31709e-08	Up	tryparedoxin peroxidase OS=Leishmania_mexicana_MHOM/GT/2001/U1103 GN=LmxM.15.1040	LmxM.15.1040	1	3.17605e-07	140.05	2	K(1)ISLSAYK(1)GR	0.10168	2330300	2264200	2306800	568530	563320	551490	552680	542580	546890	1263600	1228700	1189000	555380	549850	563860	310420	315760	321420	2.51045	2.3861	2.464	0.631651	0.623932	0.586232	0.525009	0.500362	0.511289	1.5468	1.49143	1.46624	0.624949	0.624624	0.635257	0.345336	0.358685	0.367935
LmxM.15.1040	168	K	2.16167	2.65441e-07	Up	tryparedoxin peroxidase OS=Leishmania_mexicana_MHOM/GT/2001/U1103 GN=LmxM.15.1040	LmxM.15.1040	1	1.61018e-139	224.07	3	LLEAFQFVEK(1)HGEVCPANWK(1)K	-0.79693	2651100	2967400	3218200	1355700	1356900	1326900	1537700	1569400	1485200	1311200	1707900	1560800	1244000	1345900	1200600	842990	722930	758220	1.6758	1.83487	2.01697	0.883778	0.881832	0.82761	0.857079	0.8492	0.814718	0.941778	1.2164	1.12935	0.821355	0.897105	0.793657	0.550264	0.481847	0.509272
LmxM.15.1160	198	K	4.20504	0.00822718	Up	tryparedoxin peroxidase OS=Leishmania_mexicana_MHOM/GT/2001/U1103 GN=LmxM.15.1160	LmxM.15.1160	1	0.000235189	112.8	2	ASIEGYFSK(1)Q	1.4984	207060	194010	206770	68230	0	0	71136	0	0	169730	173720	156920	77549	69016	60337	0	0	0	2.24569	1.61586	2.11432	0.593782			0.353631			1.95542	1.87266	2.07812	0.788468	0.662575	0.671767
LmxM.15.1210	359	K	1.70362	5.02848e-05	Up	inositol/phosphatidylinositol phosphatase, putative OS=Leishmania_mexicana_MHOM/GT/2001/U1103 GN=LmxM.15.1210	LmxM.15.1210	1	1.95193e-22	110.58	2	FDVGTDAYDTSEK(1)R	2.017	50608	49144	0	28066	29800	27047	24578	24078	24512	32950	34657	35414	15749	15437	14661	0	0	0	1.55338	1.54723		0.97786	1.03844	0.947817	0.871218	0.828872	0.795844	1.16006	1.16365	1.18032	0.492463	0.489783	0.457098
LmxM.15.1290	779	K	2.13554	0.00886924	Up	mitochondrial DNA topoisomerase II OS=Leishmania_mexicana_MHOM/GT/2001/U1103 GN=LmxM.15.1290	LmxM.15.1290	1	0.00122973	101.41	2	YIFTK(1)LSR	-0.33573	125930	115100	114630	34696	33480	0	67909	72836	66917	69087	68993	68675	69448	65338	70418	0	27505	31346	1.66352	1.58617	1.56659	0.495261	0.480244		0.899775	0.989141	0.894401	0.96104	0.991379	0.967403	0.931224	0.859346	0.906765		0.59519	0.646982
LmxM.15.1380	387	K	3.13497	4.31322e-09	Up	nucleolar RNA binding protein, putative OS=Leishmania_mexicana_MHOM/GT/2001/U1103 GN=LmxM.15.1380	LmxM.15.1380	1	1.08588e-145	273.23	2	AFEEGITYGK(1)SGNAR	-0.66976	1329800	1326200	1366600	403360	399720	398320	404880	389830	400850	1046300	1088700	1095900	670240	663640	641640	300670	317070	340640	1.83117	1.74638	1.83356	0.556656	0.549344	0.542071	0.61337	0.585778	0.604878	1.36331	1.4195	1.41995	0.970088	0.942847	0.931219	0.507989	0.528156	0.571683
LmxM.15.1380	194	K	14.704	0.000390691	Up	nucleolar RNA binding protein, putative OS=Leishmania_mexicana_MHOM/GT/2001/U1103 GN=LmxM.15.1380	LmxM.15.1380	1	0.00170624	101.41	2	IVLATK(1)TR	-0.59886	1537800	1161600	1135800	91158	0	0	71720	0	0	734970	793990	744600	102970	102660	102400	58089	56688	0	2.87495	2.0767	2.06892	0.170795			0.147511			1.30016	1.40549	1.30982	0.202339	0.198015	0.201766	0.133243	0.128199
LmxM.15.1380	25	K	4.42621	0.000136498	Up	nucleolar RNA binding protein, putative OS=Leishmania_mexicana_MHOM/GT/2001/U1103 GN=LmxM.15.1380	LmxM.15.1380	1	0.00180816	69.905	2	LK(1)ALLHFK	0.23677	147320	117700	115990	34075	33378	32794	0	18021	19047	84990	82500	86283	35223	0	34490	0	0	0	2.19024	1.67338	1.6802	0.507712	0.495264	0.481844		0.292364	0.310313	1.19562	1.16136	1.20702	0.55042		0.540432
LmxM.15.1440	174	K	5.75933	6.17732e-12	Up	glutaminyl-tRNA synthetase, putative OS=Leishmania_mexicana_MHOM/GT/2001/U1103 GN=LmxM.15.1440	LmxM.15.1440	1	4.13206e-113	224.13	2	SVEQNLLLFK(1)HMR	-0.26012	326870	332970	353290	52257	50319	50124	56834	57361	59637	220140	228880	218400	67803	68714	71994	40363	46474	47626	2.35272	2.37139	2.49172	0.429685	0.412289	0.406772	0.413618	0.409778	0.433649	1.61221	1.65393	1.58823	0.523951	0.52795	0.552657	0.348732	0.409835	0.411575
LmxM.15.1450	251	K	3.81642	1.23212e-06	Up	proliferative cell nuclear antigen (PCNA), putative OS=Leishmania_mexicana_MHOM/GT/2001/U1103 GN=LmxM.15.1450	LmxM.15.1450	1	9.04302e-34	114.93	2	FMGIFAK(1)GSTLSER	1.4493	300950	286980	288450	0	63753	71063	66480	62226	70679	213970	224530	216990	72909	70440	74228	28009	32329	32648	2.2432	1.87332	1.88698		0.527543	0.592067	0.499722	0.463452	0.539001	1.50974	1.56245	1.47899	0.606781	0.57893	0.596904	0.289186	0.31098	0.307766
LmxM.15.1481	326	K	1.99848	5.03668e-06	Up	cAMP specific phosphodiesterase, putative OS=Leishmania_mexicana_MHOM/GT/2001/U1103 GN=LmxM.15.1481	LmxM.15.1481	1	1.66282e-06	121.96	2	SVDK(1)VTGYHTR	-1.5613	276590	281290	285820	0	170540	171820	136140	0	130010	154840	159880	0	92565	0	95867	58263	52657	60749	1.76278	1.8701	1.87759		0.959953	0.950641	0.902135		0.863715	1.1157	1.14513		0.642961		0.676425	0.394348	0.351698	0.415842
LmxM.16.0110	45	K	1.62583	5.59505e-06	Up	Phosphotransferase enzyme family, putative OS=Leishmania_mexicana_MHOM/GT/2001/U1103 GN=LmxM.16.0110	LmxM.16.0110	1	2.1742e-07	150.88	2	ASSHIIVK(1)R	1.3154	267750	230420	239340	118120	117040	116950	155580	159040	156790	168360	166880	168270	154590	155610	154580	80358	89478	89969	1.70953	1.42705	1.53084	0.990417	0.940882	0.989959	0.915367	0.970026	0.934947	1.07523	1.10102	1.14341	0.979042	0.980227	0.987857	0.451393	0.513556	0.527417
LmxM.16.0110	622	K	2.67634	4.90302e-07	Up	Phosphotransferase enzyme family, putative OS=Leishmania_mexicana_MHOM/GT/2001/U1103 GN=LmxM.16.0110	LmxM.16.0110	1	6.59487e-08	118.91	2	LALSK(1)SGTAGR	-0.73971	0	323900	330150	97533	94760	97383	122760	124920	122010	204190	200500	210480	0	115200	110980	0	89337	0		1.93915	2.0413	0.790546	0.736388	0.796857	0.698199	0.736529	0.703307	1.2606	1.27875	1.38257		0.701492	0.685593		0.49566
LmxM.16.0230	162	K	3.25959	7.64394e-08	Up	protein tyrosine phosphatase-like protein OS=Leishmania_mexicana_MHOM/GT/2001/U1103 GN=LmxM.16.0230	LmxM.16.0230	1	4.9653e-70	156.73	2	GAINQIQMHWITK(1)YK	0.10633	293280	275040	261860	59606	64652	62175	93547	85668	89170	212940	239950	228290	86833	82036	84750	33006	30699	36964	2.37667	2.1328	2.01411	0.606917	0.681917	0.621564	0.722236	0.669854	0.700218	1.42625	1.59308	1.53535	0.673084	0.63991	0.663287	0.238126	0.217838	0.251178
LmxM.16.0230	63	K	3.09108	2.72793e-07	Up	protein tyrosine phosphatase-like protein OS=Leishmania_mexicana_MHOM/GT/2001/U1103 GN=LmxM.16.0230	LmxM.16.0230	1	4.99891e-89	224.49	2	VCGPTYDATLVK(1)SR	-0.31644	1445700	1491600	1483300	397840	387370	398700	441600	438430	443920	1153600	1211000	1201000	405840	379930	380470	233350	240110	245120	2.19613	2.16821	2.13864	0.759349	0.765895	0.747154	0.639105	0.642622	0.653451	1.44839	1.50714	1.51411	0.589703	0.555535	0.558182	0.315585	0.319385	0.312231
LmxM.16.0460	108	K	3.36683	0.00083364	Up	60S ribosomal protein L21, putative OS=Leishmania_mexicana_MHOM/GT/2001/U1103 GN=LmxM.16.0460	LmxM.16.0460	1	9.12025e-18	157.74	3	AK(1)EHQFQAHLAAK	0.74504	68242	0	56245	27705	26398	25228	0	0	0	85709	85499	83428	0	13207	16062	0	0	0	1.47894		1.21055	0.42703	0.393754	0.377445				1.36677	1.29819	1.2584		0.253266	0.315451
LmxM.16.0460	119	K	4.11992	2.24005e-05	Up	60S ribosomal protein L21, putative OS=Leishmania_mexicana_MHOM/GT/2001/U1103 GN=LmxM.16.0460	LmxM.16.0460	1	5.55995e-96	219.89	2	EHQFQAHLAAK(1)K	-1.4125	66752	70109	72268	26133	24425	21953	0	0	0	81679	80846	76705	0	14678	11813	0	0	0	1.41793	1.48161	1.52453	0.394804	0.357093	0.321927				1.27665	1.20317	1.13403		0.275888	0.227397
LmxM.16.0460	21	K	18.9016	1.40974e-07	Up	60S ribosomal protein L21, putative OS=Leishmania_mexicana_MHOM/GT/2001/U1103 GN=LmxM.16.0460	LmxM.16.0460	1	9.99817e-97	229.17	2	K(1)HGVPSVSTILTNIK	0.35954	3595800	3862000	3186600	282370	307060	313570	118880	78410	120280	2911200	3600300	3232200	212460	259230	254300	91740	0	0	2.71161	2.89743	2.38649	0.151444	0.159372	0.163245	0.145555	0.0884163	0.137985	1.61538	1.90217	1.69644	0.150447	0.172979	0.173785	0.0990025
LmxM.16.0460	141	K	29.2402	5.12711e-07	Up	60S ribosomal protein L21, putative OS=Leishmania_mexicana_MHOM/GT/2001/U1103 GN=LmxM.16.0460	LmxM.16.0460	1	2.66799e-15	167.04	2	PK(1)NVEVLAR	1.7553	687800	617510	610130	30452	29400	33841	0	0	0	469610	488330	476550	0	0	0	0	0	0	1.90003	1.69712	1.67387	0.0598297	0.0558987	0.0645378				0.954568	0.945128	0.916255
LmxM.16.0460	8	K	8.46522	1.39085e-08	Up	60S ribosomal protein L21, putative OS=Leishmania_mexicana_MHOM/GT/2001/U1103 GN=LmxM.16.0460	LmxM.16.0460	1	1.27639e-62	216.26	2	VHSYGYK(1)SGTR	2.6378	1550400	1606700	1632000	254170	308340	319070	107720	107470	117020	1407500	1424600	1452800	210990	204950	185360	51382	54795	0	2.53372	2.61227	2.64872	0.295421	0.346817	0.359976	0.285824	0.262622	0.290925	1.69252	1.63112	1.65246	0.323782	0.296372	0.274515	0.120166	0.115984
LmxM.16.0520	152	K	8.68788	0.00446489	Up	hypothetical protein, conserved OS=Leishmania_mexicana_MHOM/GT/2001/U1103 GN=LmxM.16.0520	LmxM.16.0520	1	8.83428e-22	154.09	3	EYK(1)HHELTSFHIK	1.3997	179730	185370	174610	0	24187	23971	0	0	0	105310	109040	112070	32920	32500	0	17175	21573	0	2.23793	2.21079	2.25513		0.263417	0.251004				1.36436	1.46831	1.45606	0.403478	0.388453		0.22168	0.272705
LmxM.16.0550	135	K	2.97123	3.34219e-06	Up	orotidine-5-phosphate decarboxylase/orotate phosphoribosyltransferase, putative OS=Leishmania_mexicana_MHOM/GT/2001/U1103 GN=LmxM.16.0550	LmxM.16.0550	1	5.40494e-16	154.81	2	GVFVLCK(1)TSNK	-0.35332	1265600	1286000	1260700	0	375110	357360	0	426690	0	942550	948560	939130	461340	417140	435230	260230	248720	256970	1.82186	1.83873	1.75205		0.63775	0.59929		0.584644		1.35314	1.39223	1.37807	0.67406	0.626111	0.646588	0.45612	0.43742	0.454616
LmxM.16.0590	687	K	4.15177	1.28821e-06	Up	carbamoyl-phosphate synthase, putative OS=Leishmania_mexicana_MHOM/GT/2001/U1103 GN=LmxM.16.0590	LmxM.16.0590	1	4.26424e-07	91.993	2	ATGYPLAHVATK(1)IALGK	-0.043791	377480	384590	348880	72616	74941	67726	0	0	80211	204260	240320	248790	61234	0	0	0	0	0	1.82243	1.84354	1.69831	0.452195	0.465282	0.4162			0.389053	0.940555	1.09843	1.13775	0.283789
LmxM.16.0590	1456	K	3.06606	0.0317406	Up	carbamoyl-phosphate synthase, putative OS=Leishmania_mexicana_MHOM/GT/2001/U1103 GN=LmxM.16.0590	LmxM.16.0590	1	0.00150926	62.88	3	HYVPK(1)IYHK	1.9758	216970	0	229160	71573	0	65638	0	0	43119	0	91168	167820	64208	0	0	0	0	0	1.73361		1.84618	0.737629		0.667572			0.346129		0.689638	1.27014	0.492479
LmxM.16.0590	833	K	3.50174	0.000874765	Up	carbamoyl-phosphate synthase, putative OS=Leishmania_mexicana_MHOM/GT/2001/U1103 GN=LmxM.16.0590	LmxM.16.0590	1	1.31479e-08	108.2	2	LSK(1)AMSTLYANR	0.016656	240800	257050	247210	67392	65584	52253	79146	36878	0	146900	147060	146400	49308	52936	60427	0	48040	45005	2.09729	2.2229	2.17097	0.757091	0.734583	0.579302	0.69653	0.321988		1.22031	1.21262	1.20782	0.412256	0.448486	0.515261		0.506681	0.470746
LmxM.16.0590	169	K	4.1154	5.12279e-05	Up	carbamoyl-phosphate synthase, putative OS=Leishmania_mexicana_MHOM/GT/2001/U1103 GN=LmxM.16.0590	LmxM.16.0590	1	7.42503e-06	104.39	2	NLVAEVSTK(1)TR	1.1953	250150	182320	204660	0	32221	33310	63998	48912	60373	164540	160710	164300	0	0	0	0	0	0	1.91131	1.38314	1.5767		0.3166	0.323964	0.494089	0.374641	0.463438	1.19908	1.16252	1.18912
LmxM.16.0590	675	K	2.79637	0.00623445	Up	carbamoyl-phosphate synthase, putative OS=Leishmania_mexicana_MHOM/GT/2001/U1103 GN=LmxM.16.0590	LmxM.16.0590	1	1.18601e-12	73.305	2	SSALASK(1)ATGYPLAHVATK	-2.5948	0	126140	123310	35127	34169	0	0	0	0	75020	74071	78309	32629	26808	30439	0	8687.8	0		2.02679	2.01205	0.73322	0.711097					1.15792	1.13483	1.2004	0.506882	0.422004	0.482259		0.170253
LmxM.16.0760	197	K	3.03325	1.65163e-05	Up	transaldolase, putative OS=Leishmania_mexicana_MHOM/GT/2001/U1103 GN=LmxM.16.0760	LmxM.16.0760	1	0.00764412	73.637	2	ILDWHK(1)K	0.52834	406960	369740	375950	67564	70261	0	0	118520	0	235680	242880	246310	114900	113750	113030	0	0	129250	2.07379	1.81015	1.89535	0.61263	0.633133			0.659551		1.28356	1.35906	1.3606	0.642215	0.620629	0.620006			0.371554
LmxM.16.0760	226	K	7.89874	1.1768e-09	Up	transaldolase, putative OS=Leishmania_mexicana_MHOM/GT/2001/U1103 GN=LmxM.16.0760	LmxM.16.0760	1	3.6699e-29	175.51	2	IYNYYK(1)QHGYK	0.055293	1002500	924700	916810	70695	67967	72938	96663	103350	103690	501090	483990	485690	118710	113800	120160	126450	136530	149220	3.29309	2.91826	2.97952	0.413217	0.394807	0.422499	0.34827	0.370743	0.377637	1.7592	1.74578	1.72947	0.427715	0.400248	0.424882	0.228712	0.253258	0.276519
LmxM.16.0760	279	K	2.91343	4.88275e-06	Up	transaldolase, putative OS=Leishmania_mexicana_MHOM/GT/2001/U1103 GN=LmxM.16.0760	LmxM.16.0760	1	1.67873e-13	126.21	2	LHPTK(1)VAAVEK	-1.1768	348040	331670	351860	77884	75830	72954	84729	89203	94669	224600	231170	0	120290	121910	118580	150050	0	166930	2.13723	1.95673	2.13766	0.851019	0.823436	0.789993	0.570677	0.598197	0.644536	1.47404	1.55878		0.810211	0.801546	0.78383	0.507351		0.578274
LmxM.16.1130	139	K	4.69192	2.5892e-05	Up	tyrosyl or methionyl-tRNA synthetase-like protein OS=Leishmania_mexicana_MHOM/GT/2001/U1103 GN=LmxM.16.1130	LmxM.16.1130	1	5.23738e-08	103.69	2	LAK(1)NFEEVMK	1.6666	206790	200170	218190	0	0	0	0	51743	49114	175630	147810	144970	40983	42426	0	0	0	43546	1.88592	1.83058	1.98989					0.413863	0.396947	1.46204	1.25186	1.25228	0.361625	0.375875				0.255348
LmxM.16.1130	134	K	8.02404	1.36036e-11	Up	tyrosyl or methionyl-tRNA synthetase-like protein OS=Leishmania_mexicana_MHOM/GT/2001/U1103 GN=LmxM.16.1130	LmxM.16.1130	1	2.2835e-31	130.65	2	VVFEGHDMPYEPVLK(1)K	-0.92188	552970	544940	567940	50901	0	53190	77934	81129	76608	391840	434210	416300	88535	67609	0	59883	59516	75724	2.69301	2.66123	2.76591	0.338189		0.342746	0.328546	0.346517	0.330631	1.74186	1.96379	1.92032	0.417169	0.319859		0.182958	0.181191	0.237116
LmxM.16.1310	90	K	4.82087	1.84387e-07	Up	cytochrome c, putative OS=Leishmania_mexicana_MHOM/GT/2001/U1103 GN=LmxM.16.1310	LmxM.16.1310	1	3.05182e-11	77.358	2	FMPGTK(1)MSFAGIK	0.85424	1055500	1047500	1075500	179610	175420	179280	0	233450	232740	745280	751110	760550	222470	222390	215770	103700	101820	0	2.13772	1.95912	2.02778	0.453696	0.425921	0.470408		0.379683	0.38769	1.55274	1.46194	1.7105	0.549912	0.48148	0.460555	0.368219	0.373334
LmxM.16.1370	77	K	18.012	2.41691e-06	Up	hypothetical protein, conserved OS=Leishmania_mexicana_MHOM/GT/2001/U1103 GN=LmxM.16.1370	LmxM.16.1370	1	1.09845e-07	85.622	3	GLNLLAIPFK(1)HVK(1)GLHR	-0.83851	325930	768000	531840	40798	32885	33299	17335	16548	17002	306770	414990	571010	11850	0	12739	0	6284.4	7529.3	1.49859	3.37431	2.3464	0.1819	0.146174	0.152552	0.105911	0.108892	0.106182	1.24544	1.67036	2.2318	0.0718314		0.0701215		0.0401691	0.0535497
LmxM.16.1420	203	K	5.38191	0.00864058	Up	hypothetical protein, conserved OS=Leishmania_mexicana_MHOM/GT/2001/U1103 GN=LmxM.16.1420	LmxM.16.1420	1	5.00876e-68	193.62	2	SK(1)TAETDGGAVPYWWK	0.53647	258730	265410	275160	60345	0	57230	0	0	0	313120	326520	362400	50566	52506	44432	43424	0	48470	1.83201	1.8399	1.84825	0.350358		0.333436				1.34262	1.42414	1.59873	0.386493	0.400923	0.349083	0.214254		0.238941
LmxM.16.1430	316	K	3.71888	4.98125e-06	Up	Paraflagellar rod protein 2 OS=Leishmania_mexicana_MHOM/GT/2001/U1103 GN=LmxM.16.1430	LmxM.16.1430	1	3.91899e-76	195.58	2	ADLEDAEALK(1)R	1.8507	1071500	1071900	1045900	196550	171000	173790	271520	262950	286780	586560	618130	585420	331440	332090	328230	160700	160190	160240	2.17446	1.99129	1.92892	0.515594	0.438605	0.446777	0.613221	0.600245	0.663249	1.46437	1.51327	1.47843	0.622776	0.607223	0.605631	0.520864	0.511565	0.499851
LmxM.16.1430	426	K	4.10394	4.15977e-07	Up	Paraflagellar rod protein 2 OS=Leishmania_mexicana_MHOM/GT/2001/U1103 GN=LmxM.16.1430	LmxM.16.1430	1	3.2372e-44	172.51	2	HDK(1)TGDELAELR	1.2515	1098400	959190	964520	185910	0	191760	197640	198760	203470	439340	441230	453980	248720	246060	255130	118840	124790	138610	2.54425	2.03388	2.03037	0.556644		0.562683	0.509484	0.517874	0.537116	1.25192	1.23294	1.30861	0.53343	0.513539	0.537318	0.439654	0.454868	0.493519
LmxM.16.1430	451	K	7.80168	1.03899e-08	Up	Paraflagellar rod protein 2 OS=Leishmania_mexicana_MHOM/GT/2001/U1103 GN=LmxM.16.1430	LmxM.16.1430	1	1.31597e-62	224.68	2	RLYK(1)TLGQLVYK	0.99468	4305600	4184900	4080100	429500	434170	435380	417610	396390	412660	2124800	2243900	2173500	697350	664730	717600	232850	246800	272050	2.79051	2.48288	2.40318	0.359823	0.355654	0.357458	0.301215	0.288981	0.304797	1.69413	1.7544	1.753	0.418474	0.388176	0.422866	0.241033	0.25171	0.271025
LmxM.16.1430	459	K	6.94563	0.000300826	Up	Paraflagellar rod protein 2 OS=Leishmania_mexicana_MHOM/GT/2001/U1103 GN=LmxM.16.1430	LmxM.16.1430	1	0.000840931	100.84	2	TLGQLVYK(1)K	0.90402	1168400	1060100	1078900	0	194510	0	103460	103730	106300	13875	547880	13859	267470	248330	264870	0	100030	100830	2.87417	2.3872	2.41195		0.604757		0.283237	0.287026	0.298004	0.0419886	1.62586	0.0424253	0.609205	0.550406	0.592412		0.387219	0.38126
LmxM.16.1430	389	K	2.3392	1.03482e-06	Up	Paraflagellar rod protein 2 OS=Leishmania_mexicana_MHOM/GT/2001/U1103 GN=LmxM.16.1430	LmxM.16.1430	1	2.43903e-49	153.18	2	VEYQQFLDVCGQHK(1)K	-2.2355	370250	350720	353080	112870	124050	124180	120490	120010	119620	228410	224090	226980	174730	175320	179470	51670	57548	58105	1.8514	1.60541	1.60451	0.729556	0.784006	0.786616	0.67052	0.675022	0.681674	1.40507	1.35177	1.41242	0.808984	0.789895	0.815957	0.41266	0.452836	0.44661
LmxM.16.1430	555	K	3.35899	9.3855e-06	Up	Paraflagellar rod protein 2 OS=Leishmania_mexicana_MHOM/GT/2001/U1103 GN=LmxM.16.1430	LmxM.16.1430	1	0.00835086	82.716	2	SK(1)IVEYR	1.5134	109560	104780	102380	18734	18596	22749	30635	28623	30637	0	67335	63432	0	36248	36816	0	14644	15654	2.06607	1.8088	1.75458	0.456666	0.443231	0.543452	0.642934	0.607161	0.658426		1.53183	1.48858		0.615899	0.631247		0.434569	0.453762
LmxM.16.1430	582	K	3.3355	3.13302e-07	Up	Paraflagellar rod protein 2 OS=Leishmania_mexicana_MHOM/GT/2001/U1103 GN=LmxM.16.1430	LmxM.16.1430	1	1.56392e-46	191.67	2	TK(1)VLQAQQYR	-0.82228	1277900	1239200	1206200	290260	297690	304440	284580	275020	298810	634900	614520	605300	329750	327310	328520	146850	153650	158020	2.31012	2.05069	1.98163	0.678266	0.680175	0.697182	0.57253	0.55924	0.615604	1.41196	1.34014	1.3617	0.551938	0.533127	0.539971	0.423995	0.437096	0.439097
LmxM.16.1600	337	K	8.18784	2.63337e-08	Up	eukaryotic translation initiation factor 4 gamma 3 OS=Leishmania_mexicana_MHOM/GT/2001/U1103 GN=LmxM.16.1600	LmxM.16.1600	1	5.6343e-105	207	2	DATTTK(1)TGTAASPAPSVDK	-2.5971	295670	244450	255260	26680	25337	25043	26019	24076	0	172030	180770	178250	28968	23616	25964	21232	20067	24445	2.7231	2.15423	2.44658	0.311885	0.304648	0.303726	0.29432	0.276233		1.52517	1.60011	1.59376	0.305369	0.25658	0.277372	0.280484	0.274179	0.3033
LmxM.16.1600	328	K	4.17899	0.000105222	Up	eukaryotic translation initiation factor 4 gamma 3 OS=Leishmania_mexicana_MHOM/GT/2001/U1103 GN=LmxM.16.1600	LmxM.16.1600	1	1.94018e-11	117.21	2	DQGSPAAASK(1)SWR	2.732	167240	173350	179130	0	0	30697	0	0	35642	116710	116970	115540	0	34138	30130	0	0	0	1.4484	1.43654	1.61449			0.350092			0.367694	0.972998	0.973622	0.971444		0.348776	0.302678
LmxM.17.0010	568	K	1.56605	3.34053e-05	Up	eukaryotic translation initiation factor 3 subunit a OS=Leishmania_mexicana_MHOM/GT/2001/U1103 GN=LmxM.17.0010	LmxM.17.0010	1	5.06442e-05	133.98	2	ACINSK(1)AER	0.63745	340230	333190	343560	192530	204660	201510	176570	178040	180830	331140	328170	352000	204990	205900	200910	0	89606	94231	1.3472	1.32023	1.34515	0.884245	0.954319	0.914014	0.784269	0.784935	0.80268	1.30884	1.2964	1.41031	0.871794	0.880325	0.85857		0.420282	0.445263
LmxM.17.0010	167	K	3.08902	0.000793758	Up	eukaryotic translation initiation factor 3 subunit a OS=Leishmania_mexicana_MHOM/GT/2001/U1103 GN=LmxM.17.0010	LmxM.17.0010	1	3.09564e-18	112.7	2	HFCGNNTIGFAK(1)K	0.87905	142910	140890	120990	40963	40209	43872	25907	0	0	85426	81692	78829	0	30919	31112	15544	15836	17242	2.16617	2.137	1.81336	0.720169	0.717715	0.761749	0.440487			1.29251	1.23535	1.209		0.506035	0.508945	0.274116	0.284327	0.311873
LmxM.17.0010	377	K	3.50519	2.53672e-06	Up	eukaryotic translation initiation factor 3 subunit a OS=Leishmania_mexicana_MHOM/GT/2001/U1103 GN=LmxM.17.0010	LmxM.17.0010	1	0.000129499	92.732	2	TSLIANLK(1)TK	-0.46611	156960	121340	121450	35588	33201	0	32960	32367	32187	90457	0	87053	0	0	37875	0	0	0	2.03696	1.57577	1.55846	0.535686	0.507393		0.479808	0.467682	0.468258	1.17179		1.14311			0.530468
LmxM.17.0010	637	K	1.87719	1.33397e-07	Up	eukaryotic translation initiation factor 3 subunit a OS=Leishmania_mexicana_MHOM/GT/2001/U1103 GN=LmxM.17.0010	LmxM.17.0010	1	1.97862e-21	117.21	2	YPGFK(1)ADEAIVYR	0.96423	111100	107510	103490	49367	47724	50533	52150	0	49214	94331	98162	97438	47548	49269	54896	16647	19170	0	1.56293	1.51346	1.43956	0.80552	0.790611	0.814323	0.822939		0.776115	1.32463	1.37768	1.38697	0.718421	0.748387	0.833452	0.272461	0.319442
LmxM.17.0010	175	K	9.2015	5.99912e-05	Up	eukaryotic translation initiation factor 3 subunit a OS=Leishmania_mexicana_MHOM/GT/2001/U1103 GN=LmxM.17.0010	LmxM.17.0010	1	6.96484e-08	136.84	2	LTFIYNK(1)TVR	-2.8148	216910	214580	208660	0	24063	19766	0	0	16372	96160	94147	102300	20184	0	24596	0	0	0	2.11973	2.09838	2.01625		0.276917	0.221266			0.179355	0.938011	0.917881	1.01155	0.21185		0.259405
LmxM.17.0010	662	K	7.85542	5.71823e-05	Up	eukaryotic translation initiation factor 3 subunit a OS=Leishmania_mexicana_MHOM/GT/2001/U1103 GN=LmxM.17.0010	LmxM.17.0010	1	0.00160272	88.201	2	LLAAFK(1)R	0.099255	224080	227940	203380	0	0	28897	20244	0	24400	151670	144080	145230	25221	27031	0	14044	12301	17020	2.28534	2.32629	2.05098			0.337595	0.231596		0.278964	1.54405	1.46599	1.49871	0.276268	0.297671		0.166641	0.148604	0.207142
LmxM.17.0010	537	K	1.77068	0.0297655	Up	eukaryotic translation initiation factor 3 subunit a OS=Leishmania_mexicana_MHOM/GT/2001/U1103 GN=LmxM.17.0010	LmxM.17.0010	1	5.61874e-05	83.214	2	YSDFTHVAASSSK(1)R	1.4486	0	46614	50306	0	23290	23466	0	24561	0	45696	48271	45917	0	31851	28206	0	13543	0		1.23923	1.3215		0.728637	0.714128		0.726513		1.21181	1.2794	1.23432		0.913673	0.808717		0.426186
LmxM.17.0080	383	K	2.8789	1.62524e-05	Up	elongation factor 1-alpha OS=Leishmania_mexicana_MHOM/GT/2001/U1103 GN=LmxM.17.0080	LmxM.17.0080	1	2.3991e-05	88.24	2	NPK(1)AIK(1)SGDAAIVK	-0.017676	4485400	4502300	4484100	0	0	0	1619300	0	1634800	3515300	3522900	3571600	1588400	0	1538200	0	753610	0	1.49629	1.43686	1.46789				0.500016		0.519132	1.20653	1.17979	1.20276	0.561836		0.551937		0.339952
LmxM.17.0080	55	K	1.63584	2.75915e-05	Up	elongation factor 1-alpha OS=Leishmania_mexicana_MHOM/GT/2001/U1103 GN=LmxM.17.0080	LmxM.17.0080	1	2.14998e-13	117.45	2	ASFK(1)YAWVLDK(1)LK	-1.4082	815620	826830	797020	440760	455980	423590	474820	555510	571110	899840	967840	918320	466730	461730	438540	257460	270060	275310	1.34711	1.30646	1.29178	0.808383	0.798027	0.732258	0.725913	0.861151	0.897909	1.52911	1.60475	1.53112	0.817362	0.81782	0.779086	0.571727	0.603157	0.620753
LmxM.17.0080	366	K	7.28743	3.83583e-11	Up	elongation factor 1-alpha OS=Leishmania_mexicana_MHOM/GT/2001/U1103 GN=LmxM.17.0080	LmxM.17.0080	1	6.91516e-49	203.52	2	FAEIESK(1)IDRR	1.4586	4391200	4377800	4355000	574730	545210	566160	601290	610600	619000	2860500	2805600	2827900	661740	587990	639510	339070	346070	350780	2.66664	2.54333	2.59521	0.387566	0.350834	0.359852	0.337992	0.348025	0.357824	1.78724	1.71039	1.73359	0.426091	0.382918	0.417725	0.276844	0.284185	0.290803
LmxM.17.0080	84	K	5.00536	7.47593e-08	Up	elongation factor 1-alpha OS=Leishmania_mexicana_MHOM/GT/2001/U1103 GN=LmxM.17.0080	LmxM.17.0080	1	1.54989e-176	301.95	2	FESPK(1)SVFTIIDAPGHR	2.7888	2640800	2527100	2606800	521030	488160	532600	501120	532950	447470	1633300	1723000	1685900	491470	449680	526170	249300	236730	280660	2.48969	2.27929	2.41169	0.545474	0.487675	0.525552	0.437314	0.471596	0.401581	1.58429	1.63074	1.60452	0.491295	0.454642	0.533579	0.316008	0.301801	0.361222
LmxM.17.0080	318	K	3.1801	2.09223e-06	Up	elongation factor 1-alpha OS=Leishmania_mexicana_MHOM/GT/2001/U1103 GN=LmxM.17.0080	LmxM.17.0080	1	1.06787e-96	216.53	2	GNVCGNSK(1)NDPPK	-1.1604	602530	619550	637240	197090	202020	203310	174380	177470	179920	422070	471660	487280	227840	226700	229500	91309	95411	91953	1.92368	1.89233	1.99646	0.698747	0.683449	0.679387	0.515339	0.531805	0.546805	1.38643	1.51172	1.57049	0.771292	0.776178	0.788132	0.391952	0.411916	0.400777
LmxM.17.0080	158	K	2.85915	1.26769e-09	Up	elongation factor 1-alpha OS=Leishmania_mexicana_MHOM/GT/2001/U1103 GN=LmxM.17.0080	LmxM.17.0080	1	5.49732e-81	232.48	2	MDDK(1)TVMYAQSR	0.064546	4494300	4309800	4313100	1422300	1418900	1454700	1562300	1570200	1537100	3778000	3834700	3799800	1310500	1268200	1241200	621240	619130	648390	1.95346	1.79211	1.83965	0.68649	0.653508	0.661789	0.628561	0.640575	0.635979	1.68952	1.67325	1.66726	0.603967	0.591132	0.580291	0.36305	0.363898	0.384734
LmxM.17.0080	427	K	3.27977	4.21071e-05	Up	elongation factor 1-alpha OS=Leishmania_mexicana_MHOM/GT/2001/U1103 GN=LmxM.17.0080	LmxM.17.0080	1	1.61283e-32	195.8	2	QTVAVGIIK(1)GVNK(1)K	-4.2548	122480	104710	107780	40816	37439	38463	25436	26768	27678	46103	57136	43204	42267	48461	46185	19540	19681	23075	2.37917	1.94588	2.05449	0.880425	0.770625	0.782003	0.457353	0.488034	0.511793	0.921403	1.11419	0.847202	0.870557	1.00951	0.964993	0.510329	0.516969	0.611907
LmxM.17.0080	301	K	3.07797	2.36225e-06	Up	elongation factor 1-alpha OS=Leishmania_mexicana_MHOM/GT/2001/U1103 GN=LmxM.17.0080	LmxM.17.0080	1	2.46566e-166	233.7	4	SIEMHHEQLAEAQPGDNVGFNVK(1)NVSVK(1)DIR	10.833	10538000	9515300	8495300	3177900	3148000	2924700	2875300	2898700	3016300	7224200	8236000	7053100	3815700	3958500	4132400	1690900	1552700	1861600	2.08522	1.80128	1.64959	0.698289	0.660064	0.60573	0.526646	0.538357	0.568155	1.47076	1.63606	1.40889	0.800576	0.840001	0.879545	0.449859	0.415468	0.502879
LmxM.17.0080	306	K	3.07797	2.36225e-06	Up	elongation factor 1-alpha OS=Leishmania_mexicana_MHOM/GT/2001/U1103 GN=LmxM.17.0080	LmxM.17.0080	1	2.46566e-166	233.7	4	SIEMHHEQLAEAQPGDNVGFNVK(1)NVSVK(1)DIR	10.833	10538000	9515300	8495300	3177900	3148000	2924700	2875300	2898700	3016300	7224200	8236000	7053100	3815700	3958500	4132400	1690900	1552700	1861600	2.08522	1.80128	1.64959	0.698289	0.660064	0.60573	0.526646	0.538357	0.568155	1.47076	1.63606	1.40889	0.800576	0.840001	0.879545	0.449859	0.415468	0.502879
LmxM.17.0080	20	K	4.25975	2.88203e-05	Up	elongation factor 1-alpha OS=Leishmania_mexicana_MHOM/GT/2001/U1103 GN=LmxM.17.0080	LmxM.17.0080	1	9.93018e-198	294.75	4	VHMNLVVVGHVDAGK(1)STATGHLIYK(1)CGGIDK(1)R	9.2727	2779800	2676300	2499400	821400	599810	586160	478160	507000	608390	696340	1330200	1327400	703130	475990	609810	311850	327680	439370	2.66438	2.45405	2.35084	0.874256	0.609192	0.588035	0.424227	0.456104	0.55509	0.686695	1.27994	1.28436	0.714584	0.489256	0.628695	0.401877	0.424707	0.574905
LmxM.17.0140	115	K	3.3951	1.40231e-07	Up	peptidase t, putative OS=Leishmania_mexicana_MHOM/GT/2001/U1103 GN=LmxM.17.0140	LmxM.17.0140	1	0.00659197	78.178	2	EK(1)NIWMR	1.4904	45934	51359	47503	14643	16727	14948	16542	16824	0	34024	32321	0	0	13561	15723	0	0	0	1.83392	1.95505	1.79435	0.533236	0.606331	0.505114	0.545376	0.550816		1.36496	1.2487			0.504879	0.576665
LmxM.17.0480	482	K	9.11234	1.594e-05	Up	Phenazine biosynthesis-like protein, putative OS=Leishmania_mexicana_MHOM/GT/2001/U1103 GN=LmxM.17.0480	LmxM.17.0480	1	5.85021e-16	115.05	3	FK(1)VGDHLHFYQASK	0.81167	198850	193280	186590	0	0	0	24298	21639	0	86276	85476	89880	26878	25049	22845	0	13321	12832	2.49594	2.51222	2.40528				0.285372	0.257001		1.20291	1.23891	1.28312	0.343645	0.322678	0.295473		0.157968	0.151099
LmxM.17.0640	382	K	3.30518	0.00122757	Up	VID27 cytoplasmic protein, putative OS=Leishmania_mexicana_MHOM/GT/2001/U1103 GN=LmxM.17.0640	LmxM.17.0640	1	0.00128472	79.889	2	KPAGGYFPK(1)TAK	-0.53165	321030	248670	0	80855	95579	109650	0	0	75472	173970	207520	198410	0	0	0	0	0	0	1.90293	1.46415		0.44979	0.533119	0.619578			0.434971	0.974349	1.18691	1.14044
LmxM.17.0725	344	K	1.51782	0.0110593	Up	GMP reductase OS=Leishmania_mexicana_MHOM/GT/2001/U1103 GN=LmxM.17.0725	LmxM.17.0725	1	7.01489e-06	78.864	2	K(1)HGVPCIADGGVK	1.5886	217350	173750	184590	0	116930	0	146740	142640	146250	0	135370	0	0	110980	107310	0	0	0	1.42058	1.15336	1.21189		0.650253		0.898076	0.878507	0.898845		0.889795			0.725924	0.719402
LmxM.17.0725	239	K	2.4111	0.000260834	Up	GMP reductase OS=Leishmania_mexicana_MHOM/GT/2001/U1103 GN=LmxM.17.0725	LmxM.17.0725	1	0.000994783	54.436	2	LVVGAAIGVK(1)K	-0.95436	58099	51014	0	35062	31684	31014	19553	19571	19008	45471	0	0	0	22689	27894	0	0	0	1.7144	1.52886		0.874842	0.795487	0.753171	0.540274	0.544193	0.527426	1.39573				0.670036	0.844265
LmxM.17.0760	247	K	1.55503	0.00150775	Up	Alpha/beta hydrolase family, putative OS=Leishmania_mexicana_MHOM/GT/2001/U1103 GN=LmxM.17.0760	LmxM.17.0760	1	1.2264e-12	88.203	3	RPTVIK(1)TADNHEDLFSAK	1.2055	93680	91723	83215	0	0	0	61723	0	64085	67170	0	61483	0	0	77716	44150	0	54207	1.24456	1.19525	1.14457				0.743821		0.792861	1.00276		0.919879			1.03662	0.597019		0.672191
LmxM.17.0870	333	K	2.49339	9.66454e-06	Up	hypothetical protein, conserved OS=Leishmania_mexicana_MHOM/GT/2001/U1103 GN=LmxM.17.0870	LmxM.17.0870	1	5.84724e-13	81.908	2	FVLVK(1)AVAPAAQHGGPTYK	-1.6042	92129	80872	89184	0	34496	31928	37090	37380	0	59328	61085	58416	31054	21741	0	15580	22425	28053	1.99351	1.73233	2.04096		0.808012	0.72538	0.76646	0.783926		1.46911	1.46126	1.40183	0.706007	0.473701		0.284144	0.386899	0.486812
LmxM.17.1290	642	K	4.13854	0.0111732	Up	eukaryotic translation initiation factor 3 subunit b OS=Leishmania_mexicana_MHOM/GT/2001/U1103 GN=LmxM.17.1290	LmxM.17.1290	1	0.0107986	95.311	2	EEDYIK(1)R	1.0825	0	219850	220470	54566	0	0	48786	0	0	0	151700	154570	0	0	0	0	32531	0		1.76288	1.74376	0.436694			0.41062				1.07412	1.10465					0.288796
LmxM.17.1290	458	K	4.40806	4.44581e-07	Up	eukaryotic translation initiation factor 3 subunit b OS=Leishmania_mexicana_MHOM/GT/2001/U1103 GN=LmxM.17.1290	LmxM.17.1290	1	0.00402174	88.201	2	FAVLLK(1)R	-0.25738	138000	118030	113080	32125	29168	30378	26167	22783	22985	75882	74217	79505	29724	27377	27058	0	7276.8	0	2.64492	2.23604	2.11306	0.607419	0.549646	0.579669	0.520342	0.452896	0.463314	1.25777	1.24154	1.34241	0.52234	0.477766	0.482323		0.152624
LmxM.17.1290	576	K	6.20578	2.72346e-05	Up	eukaryotic translation initiation factor 3 subunit b OS=Leishmania_mexicana_MHOM/GT/2001/U1103 GN=LmxM.17.1290	LmxM.17.1290	1	1.68601e-16	141.29	2	IFDYTGNELFK(1)K	3.198	154570	149430	157450	22438	22971	0	27685	0	0	139380	140540	142480	55250	56903	0	0	23037	25255	1.83913	1.75743	1.82651	0.263379	0.268726		0.341768			1.43422	1.45952	1.49347	0.602741	0.616477			0.299959	0.325404
LmxM.17.1400	140	K	4.64738	8.71898e-05	Up	otubain cysteine peptidase, Clan CA, family C65, putative OS=Leishmania_mexicana_MHOM/GT/2001/U1103 GN=LmxM.17.1400	LmxM.17.1400	1	6.14816e-16	89.359	2	GVTDK(1)TITSVAQVYDR	-2.0048	151510	162690	161410	0	0	28605	33306	24721	0	0	0	0	42447	0	38865	27407	0	0	1.83002	1.92773	1.95261			0.450373	0.441672	0.336682					0.538898		0.519919	0.405518
LmxM.18.0020	50	K	4.52648	0.00139406	Up	diphosphomevalonate decarboxylase, putative OS=Leishmania_mexicana_MHOM/GT/2001/U1103 GN=LmxM.18.0020	LmxM.18.0020	1	0.00266128	62.969	2	SK(1)TSVELR	-1.3447	0	150130	139970	0	34630	31564	0	0	0	105460	91883	0	0	0	0	0	0	0		1.65255	1.54652		0.367423	0.339321				0.988049	0.865646
LmxM.18.0060	60	K	4.67015	0.000761207	Up	hypothetical protein, conserved OS=Leishmania_mexicana_MHOM/GT/2001/U1103 GN=LmxM.18.0060	LmxM.18.0060	1	0.00204794	81.642	2	IGFWTK(1)PFR	-2.453	75171	75471	70378	0	12540	0	0	0	21392	0	35826	0	15858	0	0	11011	0	0	1.7189	2.15411	1.7263		0.372787				0.426519		1.79182		0.496782			0.182149
LmxM.18.0150	18	K	4.13412	0.000341774	Up	serine/threonine protein phosphatase type 5, putative OS=Leishmania_mexicana_MHOM/GT/2001/U1103 GN=LmxM.18.0150	LmxM.18.0150	1	1.54096e-10	112.73	2	LKQEGNAYFQEK(1)K	-1.283	121420	54640	57096	25699	21863	24913	16262	15488	11619	46772	50165	45996	19153	0	0	0	0	0	2.9851	1.40294	1.4304	0.586224	0.499735	0.558321	0.437761	0.41862	0.314178	1.08628	1.16789	1.08578	0.5258
LmxM.18.0150	457	K	6.50459	0.000636232	Up	serine/threonine protein phosphatase type 5, putative OS=Leishmania_mexicana_MHOM/GT/2001/U1103 GN=LmxM.18.0150	LmxM.18.0150	1	4.31535e-28	150.21	2	YTTFTHVSHPGK(1)R	-1.2502	62536	57268	61953	14284	14953	11336	4488.5	0	4655.7	38153	40522	38403	9166.1	8814	7177.8	0	0	0	2.26434	2.16563	2.28591	0.479889	0.503387	0.374164	0.177954		0.185411	1.30506	1.38943	1.33515	0.370606	0.352951	0.283279
LmxM.18.0210	210	K	10.4066	1.04804e-05	Up	Activator of Hsp90 ATPase, N-terminal/Activator of Hsp90 ATPase homolog 1-like protein, putative OS=Leishmania_mexicana_MHOM/GT/2001/U1103 GN=LmxM.18.0210	LmxM.18.0210	1	5.29839e-93	139.5	2	STAEPK(1)SGSSSSNENTSFSWK	-1.8919	189850	189020	201310	0	16851	17251	20632	0	0	124810	135290	139220	0	18767	13425	0	11941	0	2.32809	2.20038	2.35089		0.200144	0.20261	0.258303			1.28091	1.41158	1.44817		0.224892	0.160359		0.108457
LmxM.18.0210	41	K	7.38509	1.13943e-05	Up	Activator of Hsp90 ATPase, N-terminal/Activator of Hsp90 ATPase homolog 1-like protein, putative OS=Leishmania_mexicana_MHOM/GT/2001/U1103 GN=LmxM.18.0210	LmxM.18.0210	1	1.86004e-44	162.41	2	LK(1)SIFAEHAIPVPADMEK	-0.81228	424440	442660	441260	62994	66157	63302	0	40363	0	304490	351700	342940	0	58053	0	0	73245	63878	2.2228	2.20067	2.20068	0.322252	0.335573	0.317511		0.220614		1.33456	1.56714	1.52346		0.297097			0.284113	0.244115
LmxM.18.0230	137	K	18.0967	2.73305e-06	Up	60S ribosomal protein L7, putative OS=Leishmania_mexicana_MHOM/GT/2001/U1103 GN=LmxM.18.0230	LmxM.18.0230	1	0.000165116	102.55	2	LGLLK(1)IYSAR	-1.4139	494290	416810	487280	33963	34692	0	18500	0	19252	401700	429810	400960	30343	28543	30275	0	0	0	2.46117	1.96933	2.15844	0.135619	0.144976		0.0965098		0.108357	1.61505	1.72575	1.5913	0.172552	0.153683	0.163764
LmxM.18.0270	175	K	2.30108	0.000948572	Up	protein kinase, putative OS=Leishmania_mexicana_MHOM/GT/2001/U1103 GN=LmxM.18.0270	LmxM.18.0270	1	0.00107527	76.605	2	LCDFGSAK(1)K	0.62101	79667	73160	0	31405	35026	35361	0	0	0	0	0	55316	30145	0	26486	0	0	21611	1.89147	1.80029		0.728575	0.841381	0.836589						1.40467	0.737687		0.644217			0.421207
LmxM.18.0300	216	K	4.80469	1.15325e-06	Up	hypothetical protein, conserved OS=Leishmania_mexicana_MHOM/GT/2001/U1103 GN=LmxM.18.0300	LmxM.18.0300	1	3.94917e-54	181.9	2	LNK(1)ASEGAPFSNTAVR	-1.79	424180	423070	444690	106730	107910	93896	0	0	0	293450	301200	306210	48945	0	40856	0	0	0	1.78441	1.83587	1.87651	0.389592	0.395067	0.359387				1.06569	1.07618	1.11509	0.219023		0.185451
LmxM.18.0300	310	K	30.1603	5.80625e-08	Up	hypothetical protein, conserved OS=Leishmania_mexicana_MHOM/GT/2001/U1103 GN=LmxM.18.0300	LmxM.18.0300	1	2.70903e-07	150.17	2	LVNIVK(1)SER	0.19957	1990600	1918600	1935800	83245	81031	0	51663	56565	51713	1226500	1212400	1228600	61564	59857	61181	38840	43257	41727	3.30601	3.28691	3.22498	0.119965	0.117121		0.0992173	0.108106	0.0981296	1.75848	1.71021	1.76634	0.108763	0.103316	0.109639	0.0780717	0.0834596	0.0811672
LmxM.18.0470	202	K	18.1459	1.37561e-05	Up	paralyzed flagella protein 20 OS=Leishmania_mexicana_MHOM/GT/2001/U1103 GN=LmxM.18.0470	LmxM.18.0470	1	9.38064e-05	124.81	2	AK(1)SLLAIER	-0.23197	568900	481250	476100	0	32680	0	25068	26135	0	276740	272020	269430	31879	0	31710	16886	18948	22942	3.04109	2.71215	2.68407		0.188152		0.131965	0.144855		1.5229	1.48792	1.64657	0.163867		0.171597	0.0893729	0.105371	0.128378
LmxM.18.0510	406	K	1.9776	3.25443e-06	Up	aconitase, putative OS=Leishmania_mexicana_MHOM/GT/2001/U1103 GN=LmxM.18.0510	LmxM.18.0510	1	1.88802e-05	115.86	2	ACMSAK(1)SGFK	-1.2374	779500	760130	774560	305360	321650	314250	412340	430010	441160	591810	578980	585990	475310	473770	462580	252480	259330	270250	1.61911	1.55594	1.58979	0.718773	0.760902	0.738558	0.822999	0.874434	0.903153	1.22346	1.20782	1.22546	1.02467	1.01747	1.00637	0.516026	0.536365	0.569188
LmxM.18.0510	85	K	4.70827	2.92116e-06	Up	aconitase, putative OS=Leishmania_mexicana_MHOM/GT/2001/U1103 GN=LmxM.18.0510	LmxM.18.0510	1	1.14784e-06	113.46	2	K(1)GIEIPFKPAR	2.2622	176590	163980	172580	42421	35591	31588	31604	33268	29231	146960	140670	144680	134640	0	118870	91952	87041	92483	1.75666	1.60753	1.69643	0.478215	0.403225	0.355545	0.302098	0.323995	0.286597	1.45502	1.40541	1.44904	1.39009		1.23852	0.900052	0.862172	0.932855
LmxM.18.0510	478	K	8.59606	0.0116649	Up	aconitase, putative OS=Leishmania_mexicana_MHOM/GT/2001/U1103 GN=LmxM.18.0510	LmxM.18.0510	1	6.28672e-25	127.07	2	VPPGIK(1)TSLSPGSHVVTK	-3.0891	1109700	1081700	1050100	0	0	237750	0	64174	42591	682210	691210	705720	337180	329800	335420	0	244160	247520	2.12586	2.04212	1.98785			0.515346		0.120358	0.0804178	1.30075	1.3299	1.36116	0.670404	0.653241	0.67302		0.465748	0.480805
LmxM.18.0620	199	K	8.54456	4.13125e-09	Up	60S ribosomal protein L10a, putative OS=Leishmania_mexicana_MHOM/GT/2001/U1103 GN=LmxM.18.0620	LmxM.18.0620	1	5.81482e-80	223.96	2	NWQNLK(1)SAYIK	-2.0504	820440	777350	835140	99292	96321	95013	95620	93956	95274	338830	340560	348020	67671	62216	65190	57685	52845	71479	3.39103	3.08052	3.43579	0.446408	0.412639	0.427642	0.33944	0.344366	0.348489	1.44936	1.42287	1.45387	0.301301	0.27231	0.281728	0.223001	0.208807	0.274012
LmxM.18.0620	204	K	13.3803	1.37971e-08	Up	60S ribosomal protein L10a, putative OS=Leishmania_mexicana_MHOM/GT/2001/U1103 GN=LmxM.18.0620	LmxM.18.0620	1	3.64104e-96	248.5	2	SAYIK(1)STMGKPQR	0.14346	1481600	1240900	1265900	99650	101380	104820	99656	97067	99836	739930	758210	767340	242070	226590	239690	148300	147950	140420	3.37737	2.71211	2.8723	0.247092	0.239533	0.260199	0.195111	0.196214	0.201403	1.74561	1.74712	1.76796	0.594431	0.546972	0.571297	0.31619	0.322418	0.296881
LmxM.18.0680	183	K	5.64838	1.72568e-06	Up	citrate synthase, putative OS=Leishmania_mexicana_MHOM/GT/2001/U1103 GN=LmxM.18.0680	LmxM.18.0680	1	2.21741e-26	187.23	2	FAAAYAAGK(1)SNK	1.337	2451400	1582900	1585900	481010	384570	398860	451450	458090	442200	1118700	1100200	1124500	519890	462040	512050	392310	432700	429760	3.85829	2.43522	2.41756	0.549226	0.443431	0.457934	0.536483	0.552835	0.544542	1.59234	1.5914	1.63113	0.723632	0.649478	0.733555	0.376329	0.420734	0.425984
LmxM.18.0680	454	K	2.14721	3.49117e-05	Up	citrate synthase, putative OS=Leishmania_mexicana_MHOM/GT/2001/U1103 GN=LmxM.18.0680	LmxM.18.0680	1	1.92012e-62	180.81	2	PLERPK(1)SITTEMLAK	-0.062124	1023700	942290	951810	515340	509390	514200	669120	675900	670380	784460	799680	821080	748460	703920	721740	708370	686860	721020	1.75325	1.57747	1.57886	0.640298	0.639135	0.6424	0.86525	0.887603	0.898306	1.21503	1.25868	1.29601	1.13362	1.07671	1.1251	0.739416	0.726742	0.777689
LmxM.18.0680	341	K	5.82875	1.40436e-05	Up	citrate synthase, putative OS=Leishmania_mexicana_MHOM/GT/2001/U1103 GN=LmxM.18.0680	LmxM.18.0680	1	1.21333e-108	214.32	3	YTWELLK(1)SGQVVPGYGHAVLR	1.28	255360	216620	225600	59047	47320	63178	0	0	42489	148830	197250	171190	138650	101910	146330	128620	104430	74795	2.41277	2.00062	2.06454	0.404741	0.32755	0.435441			0.314102	1.27173	1.71279	1.4907	1.15853	0.85997	1.25845	0.740676	0.609576	0.445063
LmxM.18.0740	333	K	4.0182	9.3966e-06	Up	Elongation factor Tu, mitochondrial, putative OS=Leishmania_mexicana_MHOM/GT/2001/U1103 GN=LmxM.18.0740	LmxM.18.0740	1	5.10471e-06	67.548	2	AQVYVLTK(1)DEGGR	-1.9386	139020	130720	0	43155	38882	33320	42393	42913	42072	105230	125560	114990	60030	61248	0	0	0	0	2.20508	2.03987		0.530701	0.478783	0.418606	0.572721	0.591429	0.577057	1.35867	1.63096	1.53646	0.818986	0.825578
LmxM.18.0740	21	K	14.9786	1.73628e-05	Up	Elongation factor Tu, mitochondrial, putative OS=Leishmania_mexicana_MHOM/GT/2001/U1103 GN=LmxM.18.0740	LmxM.18.0740	1	4.21327e-55	164.22	3	GK(1)PHLIIGTIGHVDHGK	2.1442	662870	598430	542470	63276	55896	51116	30652	0	0	383380	340260	368860	55214	75958	68523	40667	46250	47329	3.6943	3.28117	2.98215	0.27341	0.241839	0.225638	0.1455			1.73925	1.55296	1.73172	0.264675	0.359746	0.323537	0.168859	0.194688	0.197141
LmxM.18.0740	323	K	3.65714	1.75801e-05	Up	Elongation factor Tu, mitochondrial, putative OS=Leishmania_mexicana_MHOM/GT/2001/U1103 GN=LmxM.18.0740	LmxM.18.0740	1	1.65446e-23	133.07	2	GMVMAATGSTNLYNK(1)VK	2.4847	106380	106700	110580	31112	0	0	37614	32582	37416	99376	103990	103770	33604	28264	0	25311	22104	0	2.02544	1.99865	2.07676	0.459261			0.609973	0.539018	0.616021	1.54017	1.62142	1.66435	0.550315	0.457312		0.359045	0.317873
LmxM.18.0740	325	K	3.05316	3.38471e-07	Up	Elongation factor Tu, mitochondrial, putative OS=Leishmania_mexicana_MHOM/GT/2001/U1103 GN=LmxM.18.0740	LmxM.18.0740	1	0.000640787	92.428	2	VK(1)AQVYVLTK	-0.83286	104090	96660	91656	39295	36742	36836	36770	41211	39793	0	82771	86838	43703	44521	41855	33445	0	39457	2.22238	2.03033	1.93027	0.650455	0.608995	0.622922	0.668657	0.764518	0.734672		1.44721	1.56182	0.802565	0.807778	0.757077	0.53201		0.629621
LmxM.18.0740	85	K	4.68626	5.5511e-06	Up	Elongation factor Tu, mitochondrial, putative OS=Leishmania_mexicana_MHOM/GT/2001/U1103 GN=LmxM.18.0740	LmxM.18.0740	1	2.30021e-54	160.07	2	ITINATHVEYESEK(1)R	-3.6446	198670	233960	215920	0	59797	0	51269	53942	0	172430	169630	0	0	0	0	40940	0	50432	1.90411	2.20604	2.04128		0.444921		0.41852	0.449214		1.34525	1.3314					0.29234		0.361254
LmxM.18.0990	380	K	3.72522	5.04487e-07	Up	UTP-glucose-1-phosphate uridylyltransferase 2, putative OS=Leishmania_mexicana_MHOM/GT/2001/U1103 GN=LmxM.18.0990	LmxM.18.0990	1	1.55148e-23	117.21	2	FAPVK(1)TCADLLALR	-0.11675	437320	446930	464180	109810	110020	108390	110780	106610	106260	341670	355890	349170	162290	148510	161920	0	115360	112530	2.04682	2.05622	2.15242	0.633535	0.631616	0.609065	0.514893	0.482752	0.486571	1.74928	1.85583	1.7909	0.79257	0.71212	0.796018		0.367264	0.356566
LmxM.18.0990	442	K	4.04655	0.00139265	Up	UTP-glucose-1-phosphate uridylyltransferase 2, putative OS=Leishmania_mexicana_MHOM/GT/2001/U1103 GN=LmxM.18.0990	LmxM.18.0990	1	0.000124814	86.243	2	LVQHGVPSLVDCK(1)R	-0.95001	57583	61653	53600	14684	0	0	9942.2	0	14674	0	34251	0	0	0	9728	0	0	0	1.85583	1.9532	1.71147	0.58336			0.318201		0.462688		1.22987				0.329313
LmxM.18.1080	226	K	6.53745	3.88737e-08	Up	protein kinase A catalytic subunit 3 OS=Leishmania_mexicana_MHOM/GT/2001/U1103 GN=LmxM.18.1080	LmxM.18.1080	1	0.00015828	102.46	2	ILLGK(1)VLFPR	-1.4757	465740	429640	447090	69181	66468	67051	59060	55939	63567	207100	295930	232230	65964	62132	78852	55638	0	20686	2.87081	2.65502	2.62363	0.478198	0.467978	0.462005	0.346788	0.350654	0.387539	1.35621	1.88193	1.52577	0.399076	0.356364	0.481416	0.333666		0.120651
LmxM.18.1080	161	K	4.26613	8.61814e-10	Up	protein kinase A catalytic subunit 3 OS=Leishmania_mexicana_MHOM/GT/2001/U1103 GN=LmxM.18.1080	LmxM.18.1080	1	0.000950316	101.41	2	ITDFGFAK(1)R	1.0883	146250	150710	145340	28320	30021	30499	34809	33631	37169	82059	84983	90547	35036	0	0	21003	0	0	2.14215	2.21309	2.02668	0.465165	0.502263	0.499367	0.485685	0.500953	0.538466	1.27693	1.28422	1.41364	0.503682			0.299306
LmxM.18.1150	209	K	3.69821	0.000120218	Up	Zinc finger, C3HC4 type (RING finger), putative OS=Leishmania_mexicana_MHOM/GT/2001/U1103 GN=LmxM.18.1150	LmxM.18.1150	1	0.00107988	96.311	2	YK(1)TTEICK	1.0393	161780	161890	166550	36563	40110	37153	0	0	0	96984	102020	107440	0	0	31091	27445	22984	0	1.65645	1.94018	2.13196	0.483089	0.566011	0.499918				1.09825	1.16698	1.35666			0.4028	0.257387	0.227374
LmxM.18.1210	566	K	5.29972	3.49648e-06	Up	prolyl-tRNA synthetase, putative OS=Leishmania_mexicana_MHOM/GT/2001/U1103 GN=LmxM.18.1210	LmxM.18.1210	1	2.4715e-10	99.276	3	FNHWEVK(1)GVPLR	-0.27529	70916	65754	59558	13918	14979	14048	0	10776	0	38074	39928	41143	9205.5	11469	11476	0	5687.2	0	2.59426	2.46941	2.23716	0.469872	0.511564	0.463616		0.391736		1.27214	1.34925	1.37048	0.325188	0.409428	0.411048		0.175831
LmxM.18.1370	68	K	9.37398	2.40981e-10	Up	heat shock protein, putative OS=Leishmania_mexicana_MHOM/GT/2001/U1103 GN=LmxM.18.1370	LmxM.18.1370	1	5.55422e-63	234.28	2	NAQNTVFLLK(1)R	-1.5951	1607000	1549100	1540800	110240	117620	116880	133660	137770	140150	832290	875970	853960	181760	0	182300	167410	163180	178190	2.86629	2.73823	2.77695	0.301982	0.326547	0.317956	0.274392	0.281928	0.285437	1.35663	1.42713	1.39213	0.356604		0.357687	0.277995	0.270795	0.298371
LmxM.18.1370	267	K	3.67057	3.58782e-07	Up	heat shock protein, putative OS=Leishmania_mexicana_MHOM/GT/2001/U1103 GN=LmxM.18.1370	LmxM.18.1370	1	3.3873e-06	139.02	2	YNVDVSQNK(1)R	-0.78452	184970	180100	190660	34002	34357	31571	41839	0	0	176320	195090	179890	71704	0	78748	0	55950	76156	1.57698	1.52168	1.64249	0.445211	0.455932	0.410521	0.410555			1.37376	1.51925	1.40175	0.672437		0.738544		0.443807	0.609535
LmxM.18.1380	116	K	1.50359	0.0170133	Up	pyruvate dehydrogenase E1 component alpha subunit, putative OS=Leishmania_mexicana_MHOM/GT/2001/U1103 GN=LmxM.18.1380	LmxM.18.1380	1	3.09411e-05	68.108	2	GGK(1)PEDVFAEMFGR	0.44361	57573	61052	48619	35176	31245	0	0	0	0	37037	0	0	0	0	0	0	0	0	1.29333	1.28896	1.08794	0.858204	0.769119					0.826162
LmxM.18.1380	135	K	2.74157	4.71289e-07	Up	pyruvate dehydrogenase E1 component alpha subunit, putative OS=Leishmania_mexicana_MHOM/GT/2001/U1103 GN=LmxM.18.1380	LmxM.18.1380	1	0.000220652	70.389	2	GK(1)GGSMHMYK	1.1947	240470	225390	232990	79692	83061	82200	85878	79936	79077	202880	206380	209410	82309	0	80877	39499	0	0	1.81877	1.60213	1.75534	0.654611	0.688391	0.682952	0.613152	0.569113	0.567889	1.52368	1.52307	1.60108	0.586294		0.584011	0.292968
LmxM.18.1380	49	K	5.12561	2.85557e-09	Up	pyruvate dehydrogenase E1 component alpha subunit, putative OS=Leishmania_mexicana_MHOM/GT/2001/U1103 GN=LmxM.18.1380	LmxM.18.1380	1	2.92416e-05	133.9	2	K(1)SLALMFR	-0.73543	165070	173660	172330	27615	27019	29418	35519	36269	37378	117370	119990	119480	39808	35774	38678	18737	18976	23837	2.4346	2.40717	2.53179	0.442341	0.436667	0.476623	0.494527	0.503541	0.523447	1.71892	1.7268	1.78137	0.552945	0.498579	0.544632	0.271005	0.273	0.343565
LmxM.18.1380	377	K	4.93102	1.87465e-10	Up	pyruvate dehydrogenase E1 component alpha subunit, putative OS=Leishmania_mexicana_MHOM/GT/2001/U1103 GN=LmxM.18.1380	LmxM.18.1380	1	3.67244e-09	155.57	2	TCQGTVYHK(1)P	0.089682	1586700	1795600	1809400	324190	298980	315150	358570	375230	359610	1106300	1134900	1164300	358970	360060	358960	204100	195270	203300	2.35155	2.50103	2.67117	0.52181	0.485539	0.513074	0.501654	0.523477	0.506045	1.62806	1.64118	1.74431	0.501038	0.504246	0.50791	0.296635	0.282289	0.294439
LmxM.18.1380	48	K	8.90057	0.000100672	Up	pyruvate dehydrogenase E1 component alpha subunit, putative OS=Leishmania_mexicana_MHOM/GT/2001/U1103 GN=LmxM.18.1380	LmxM.18.1380	1	3.18308e-160	189.47	2	TDMAPLPTQAAYDTEQLK(1)K	-1.7295	1167400	1099400	1107600	123650	0	103030	0	0	0	710940	766750	743800	87027	146050	103090	55747	63099	80367	2.60532	2.30593	2.46225	0.299702		0.252585				1.57548	1.66968	1.67802	0.182915	0.308	0.219654	0.122006	0.137361	0.175274
LmxM.36.3740	58	K	7.38558	1.94128e-05	Up	60S ribosomal protein L34, putative OS=Leishmania_mexicana_MHOM/GT/2001/U1103 GN=LmxM.36.3740	LmxM.36.3740	1	0.000995355	105.81	2	LGGTK(1)ALR	-0.2886	545550	416050	422160	106700	111320	109370	39718	36026	0	309890	316360	312670	51294	45577	0	0	0	0	2.46857	1.75739	1.84701	0.316817	0.326505	0.31739	0.212955	0.196792		1.18411	1.30828	1.29094	0.236982	0.201364
LmxM.36.3740	52	K	6.99379	4.89919e-06	Up	60S ribosomal protein L34, putative OS=Leishmania_mexicana_MHOM/GT/2001/U1103 GN=LmxM.36.3740	LmxM.36.3740	1	1.33398e-33	208.63	3	SQGIHTPWVLGHK(1)R	-0.7552	676370	644540	531350	176400	167050	168230	50261	49302	51746	527610	537570	525740	90434	99159	97568	0	10961	0	2.41412	2.14752	1.83373	0.413148	0.386479	0.38509	0.212567	0.212432	0.219156	1.59024	1.75354	1.7122	0.329567	0.345566	0.353311		0.117383
LmxM.18.1520	484	K	7.44319	0.0215414	Up	P-type H+-ATPase, putative OS=Leishmania_mexicana_MHOM/GT/2001/U1103 GN=LmxM.18.1520	LmxM.18.1520	1	2.88564e-05	92.732	2	CLSVAK(1)TDEK	0.38034	133010	137230	131600	24285	21164	0	0	0	0	127670	135740	133190	45798	41561	0	23309	21102	23039	1.82595	1.81017	1.82767	0.261502	0.227876					1.38686	1.48889	1.47206	0.597097	0.551766		0.340276	0.317249	0.335875
LmxM.18.1520	147	K	9.26621	0.000229884	Up	P-type H+-ATPase, putative OS=Leishmania_mexicana_MHOM/GT/2001/U1103 GN=LmxM.18.1520	LmxM.18.1520	1	2.82154e-119	186.7	2	AGDAVAALK(1)NSLKPTATVYR	0.057727	1069800	1079000	902590	147500	116460	215310	0	0	50264	511130	746980	648560	112530	0	127300	69504	0	93301	2.68161	2.59884	2.28886	0.290012	0.228962	0.412724			0.157465	1.01382	1.49606	1.30885	0.267888		0.309504	0.18527		0.248363
LmxM.18.1580	284	K	5.43486	3.79982e-06	Up	nonspecific nucleoside hydrolase OS=Leishmania_mexicana_MHOM/GT/2001/U1103 GN=LmxM.18.1580	LmxM.18.1580	1	2.27273e-27	156.73	2	YPQPK(1)NCHTQVAVK	-2.0882	1093700	729540	781270	187510	165710	186210	136940	143790	142510	536400	560750	544010	189520	177810	194450	96193	98137	127900	3.67564	2.37256	2.70283	0.643156	0.558918	0.637144	0.444333	0.476259	0.460525	1.55079	1.55222	1.59086	0.546388	0.502122	0.566906	0.216289	0.227481	0.298018
LmxM.18.1640	106	K	13.7745	3.0712e-07	Up	hypothetical protein, conserved OS=Leishmania_mexicana_MHOM/GT/2001/U1103 GN=LmxM.18.1640	LmxM.18.1640	1	1.63467e-187	301.59	3	GSTSMNHDGNK(1)TTYK	1.8037	1506700	1544400	1438100	89870	96254	95369	82742	84558	86040	831710	862220	873990	142270	128540	147670	83604	84044	89555	3.14051	3.15519	3.07712	0.251543	0.273629	0.268726	0.186534	0.187039	0.193422	2.0187	2.10753	2.09006	0.289953	0.255846	0.304649	0.147641	0.14829	0.155339
LmxM.18.1640	54	K	10.3856	5.70809e-12	Up	hypothetical protein, conserved OS=Leishmania_mexicana_MHOM/GT/2001/U1103 GN=LmxM.18.1640	LmxM.18.1640	1	2.09538e-103	224.07	3	TPFALVHK(1)DDPPHWFGELR	-0.92079	2055800	1875900	1876500	141660	139210	137860	168740	180910	166880	878040	961700	900200	215250	195890	211390	139940	169020	178430	3.34429	2.99106	3.13367	0.309452	0.308861	0.303173	0.296893	0.312312	0.292792	1.66327	1.83461	1.68012	0.342378	0.3043	0.340362	0.192873	0.232752	0.241551
LmxM.19.0100	294	K	3.38018	2.52777e-08	Up	fibrillarin, putative OS=Leishmania_mexicana_MHOM/GT/2001/U1103 GN=LmxM.19.0100	LmxM.19.0100	1	5.49872e-23	130.99	2	DHCVVTGYYK(1)NVPQAA	1.946	421650	438920	427780	135510	134030	134380	120110	118870	122940	354680	378780	359640	0	136070	133720	71153	0	75289	1.91141	1.92189	1.88462	0.604371	0.590535	0.590581	0.523263	0.5284	0.546053	1.53513	1.66585	1.55804		0.607965	0.595652	0.343153		0.362652
LmxM.19.0100	98	K	8.60249	4.21237e-05	Up	fibrillarin, putative OS=Leishmania_mexicana_MHOM/GT/2001/U1103 GN=LmxM.19.0100	LmxM.19.0100	1	3.17408e-08	96.946	2	SLVPGVSVYSEK(1)R	-0.64609	407870	370500	366550	0	0	0	45553	44026	0	286620	300210	289100	0	0	0	0	0	0	1.561	1.36965	1.36337				0.167547	0.165226		1.04736	1.11469	1.05739
LmxM.19.0150	274	K	6.44794	1.47964e-06	Up	mitogen-activated protein kinase kinase kinase, putative OS=Leishmania_mexicana_MHOM/GT/2001/U1103 GN=LmxM.19.0150	LmxM.19.0150	1	1.07281e-27	189.56	3	RPPAATLLK(1)HVFLR	-0.99955	3134800	3155700	2995600	568220	549170	561870	385210	446480	443770	1997100	2424200	2256700	697400	619360	703010	534530	560630	733710	2.59732	2.67448	2.47232	0.478796	0.460727	0.482791	0.293585	0.338079	0.348064	1.71351	2.12089	1.97944	0.561849	0.49939	0.567556	0.362624	0.364231	0.477462
LmxM.19.0300	266	K	6.5636	7.43421e-05	Up	RNA binding protein, putative OS=Leishmania_mexicana_MHOM/GT/2001/U1103 GN=LmxM.19.0300	LmxM.19.0300	1	1.01149e-22	141.44	2	YPYDACLSNLK(1)NK	2.5439	258070	244590	253200	36606	34206	45195	21783	31908	0	206630	206380	198390	0	0	19536	14268	0	0	2.16689	2.0726	2.27783	0.377261	0.353908	0.458177	0.192356	0.273212		1.53825	1.55932	1.47526			0.174932	0.0942631
LmxM.19.0330	270	K	4.00237	4.3416e-05	Up	intraflagellar transport protein 80, putative OS=Leishmania_mexicana_MHOM/GT/2001/U1103 GN=LmxM.19.0330	LmxM.19.0330	1	3.51265e-22	139.7	2	VCDK(1)TGWSHSYER	1.1347	63874	45001	46632	13437	12140	10888	11689	0	0	24225	25318	24718	8369.4	11918	8933.1	0	0	8494	2.65133	1.94614	2.12114	0.631163	0.595851	0.525178	0.486018			1.12698	1.17364	1.15083	0.361489	0.520642	0.390861			0.356879
LmxM.19.0390	27	K	4.89156	0.00140812	Up	40S ribosomal protein S13, putative OS=Leishmania_mexicana_MHOM/GT/2001/U1103 GN=LmxM.19.0390	LmxM.19.0390	1	2.3991e-05	88.24	2	TPPAWLK(1)IASR	-2.1983	369710	367900	374930	120550	0	118060	0	0	41992	412380	437830	421810	60188	0	0	0	0	31917	1.57955	1.58351	1.6427	0.395038		0.378845			0.208577	1.24321	1.2849	1.27803	0.239076					0.166376
LmxM.19.0490	125	K	4.07528	0.00390508	Up	hypothetical protein, conserved OS=Leishmania_mexicana_MHOM/GT/2001/U1103 GN=LmxM.19.0490	LmxM.19.0490	1	1.20537e-73	164.48	2	ASTK(1)AEQQATSASGGAAEAK	-1.4754	26581	29141	34804	0	0	0	10174	9299.3	0	17631	22246	22689	0	7082.2	8392.1	5219.9	6268.6	6147.6	1.91888	2.34627	3.02422				0.611064	0.58139		1.16425	1.77771	1.63113		0.441757	0.52853	0.274846	0.303105	0.304947
LmxM.19.0520	352	K	7.16194	8.13255e-08	Up	paraflagellar rod component, putative OS=Leishmania_mexicana_MHOM/GT/2001/U1103 GN=LmxM.19.0520	LmxM.19.0520	1	0.0011142	81.099	2	VEAINVK(1)TR	-1.4263	259310	241410	240850	0	34613	35450	0	0	27658	133300	132390	125950	0	39217	0	0	16577	0	1.94617	1.8642	1.82987		0.268029	0.261093			0.258408	1.19446	1.24609	1.18063		0.292697			0.187072
LmxM.19.0800	448	K	2.57178	3.23485e-05	Up	ABC transporter, putative OS=Leishmania_mexicana_MHOM/GT/2001/U1103 GN=LmxM.19.0800	LmxM.19.0800	1	1.043e-88	194.83	2	ELEPTAGYVAK(1)NAHCVMAR	-0.19712	182730	162060	145080	55916	51365	56315	75679	69167	79706	171530	182010	158290	0	14943	4874.9	0	0	0	1.81542	1.60234	1.46327	0.579116	0.515955	0.557554	0.710711	0.659721	0.772782	1.51413	1.65221	1.43145		0.140318	0.0452743
LmxM.19.0800	433	K	4.30522	0.000215143	Up	ABC transporter, putative OS=Leishmania_mexicana_MHOM/GT/2001/U1103 GN=LmxM.19.0800	LmxM.19.0800	1	6.74351e-05	154.28	2	TTLTK(1)LMCR	0.38103	324170	277730	280990	0	0	0	70238	0	72527	0	251410	244890	0	90341	98870	0	0	0	1.7056	1.45426	1.50088				0.349324		0.372395		1.20862	1.17283		0.449261	0.486283
LmxM.19.0860	41	K	25.5951	2.73788e-05	Up	ATG8/AUT7/APG8/PAZ2, putative OS=Leishmania_mexicana_MHOM/GT/2001/U1103 GN=LmxM.19.0860	LmxM.19.0860	1	1.47162e-16	150.21	2	AGSK(1)AHFLALPR	2.144	659860	628710	557290	0	0	0	7306.6	11097	11072	178320	181630	195110	33523	29467	0	67910	71742	0	2.84911	2.68719	2.33909				0.0762235	0.116905	0.114563	1.17965	1.21257	1.33822	0.145374	0.131058		0.144497	0.146804
LmxM.19.0970	151	K	2.27345	3.40953e-05	Up	peptidyl-prolyl cis-trans isomerase, macrophage infectivity potentiator precursor, putative OS=Leishmania_mexicana_MHOM/GT/2001/U1103 GN=LmxM.19.0970	LmxM.19.0970	1	0.000328752	67.881	2	EK(1)NVPSLSNLR	-2.3732	107710	106580	116890	69641	70886	56424	76512	75784	0	0	111520	103280	101530	0	0	57445	47493	0	1.78334	1.73299	1.63726	0.78892	0.768097	0.606652	0.827316	0.787104			1.57277	1.48444	1.0869			0.636492	0.462731
LmxM.19.1005	118	K	4.29477	1.39694e-07	Up	4-coumarate:coa ligase-like protein OS=Leishmania_mexicana_MHOM/GT/2001/U1103 GN=LmxM.19.1005	LmxM.19.1005	1	0.000213876	106.93	2	TLYEYLMK(1)R	0.28808	246850	257280	245530	0	46857	44792	66516	69634	71002	112390	0	105050	0	0	58890	44107	43110	43838	2.31393	2.31518	2.25373		0.509808	0.467684	0.548881	0.565766	0.578877	1.70983		1.54273			0.552247	0.351839	0.334466	0.338917
LmxM.19.1040	413	K	8.71333	0.000139603	Up	phenylalanyl-tRNA synthetase, putative OS=Leishmania_mexicana_MHOM/GT/2001/U1103 GN=LmxM.19.1040	LmxM.19.1040	1	1.9619e-57	146.58	3	THGPVTQTPLSK(1)VAQLLR	-1.8447	91610	110450	100910	0	10024	10568	0	0	0	40868	82904	49572	0	11503	12447	10657	0	0	1.70433	2.13403	1.8858		0.213098	0.224863				0.791336	1.5738	0.92752		0.23496	0.260853	0.229931
LmxM.19.1210	151	K	2.63993	0.000991542	Up	Fcf1, putative OS=Leishmania_mexicana_MHOM/GT/2001/U1103 GN=LmxM.19.1210	LmxM.19.1210	1	1.18187e-22	110.58	2	LTCDSK(1)YADDCVVR	-0.1705	35578	35965	35393	28952	30442	27777	18984	20467	22819	27454	32485	29550	11118	12639	12069	6536.7	7577.6	9838.6	2.35432	3.51259	2.7914	0.769008	0.947081	0.831799	1.07686	1.43096	1.5038	1.22331	1.49637	1.15405	0.517279	0.660542	0.623861	0.281552	0.297028	0.253148
LmxM.19.1420	318	K	3.76143	4.30627e-05	Up	cysteine peptidase A (CPA) OS=Leishmania_mexicana_MHOM/GT/2001/U1103 GN=LmxM.19.1420	LmxM.19.1420	1	6.24458e-11	108.24	2	NSWGSSWGEK(1)GYIR	0.96126	0	62363	65584	0	0	0	16963	16798	17629	39049	35542	35634	18053	0	0	13203	0	0		1.7699	1.81817				0.459035	0.470125	0.501703	1.45228	1.33547	1.30812	0.554362			0.280516
LmxM.19.1560	478	K	4.69783	3.39594e-08	Up	inosine-5'-monophosphate dehydrogenase OS=Leishmania_mexicana_MHOM/GT/2001/U1103 GN=LmxM.19.1560	LmxM.19.1560	1	1.39837e-17	119.55	2	EK(1)MYAGQVLFSR	2.0812	263970	252850	246980	45251	51878	44356	58295	57562	58538	240080	238120	212800	50531	46682	46016	36557	38939	40623	2.30574	2.21146	2.14986	0.413143	0.489896	0.418011	0.506783	0.502494	0.508028	2.11468	2.20331	1.90743	0.434644	0.408568	0.411992	0.316669	0.34039	0.353955
LmxM.19.1560	345	K	7.40899	0.0207477	Up	inosine-5'-monophosphate dehydrogenase OS=Leishmania_mexicana_MHOM/GT/2001/U1103 GN=LmxM.19.1560	LmxM.19.1560	1	9.81779e-42	117.03	2	PQGTAVYK(1)VAQYCASR	-0.40521	581900	628120	614020	85570	68975	0	0	0	0	386330	411850	408280	109080	0	0	69422	74074	80251	1.9554	2.11344	2.05618	0.300555	0.250578					1.30912	1.46606	1.40788	0.360954			0.231346	0.249108	0.269003
LmxM.20.0100	121	K	4.5758	8.6794e-10	Up	phosphoglycerate kinase C, glycosomal OS=Leishmania_mexicana_MHOM/GT/2001/U1103 GN=LmxM.20.0100	LmxM.20.0100	1	3.22229e-35	154.09	2	LK(1)SGDVLLLENVR	-0.35953	606280	678330	703340	142770	151780	137990	138960	139470	144700	538270	600750	574760	165200	155010	157270	182120	195620	193370	2.11264	2.31455	2.40761	0.493435	0.521049	0.471828	0.482465	0.49806	0.520533	1.83244	2.09033	2.01063	0.589298	0.542046	0.564136	0.418537	0.449219	0.44762
LmxM.20.0240	179	K	12.0447	5.34132e-06	Up	transmembrane protein, putative OS=Leishmania_mexicana_MHOM/GT/2001/U1103 GN=LmxM.20.0240	LmxM.20.0240	1	7.71076e-35	200.06	2	LNTK(1)VGLVHPLK	0.33798	689950	564950	592560	82553	79229	77060	34184	32256	38482	366990	351970	352520	53779	50654	53756	0	0	0	2.97024	2.45982	2.59879	0.308947	0.299404	0.28666	0.14081	0.137708	0.159645	1.4724	1.47224	1.46272	0.241282	0.234891	0.248417
LmxM.20.0660	205	K	6.98893	6.65686e-09	Up	serine/threonine protein phosphatase 2A regulatory subunit, putative OS=Leishmania_mexicana_MHOM/GT/2001/U1103 GN=LmxM.20.0660	LmxM.20.0660	1	1.30014e-54	124.06	2	AACIAMGK(1)HLAGVLGPK	-2.0945	234130	201630	204560	42647	43866	40336	34296	32311	36018	157060	166460	159340	47949	35699	38966	0	12741	15893	2.92561	2.44044	2.41676	0.389916	0.399684	0.383898	0.354379	0.327741	0.371562	1.79803	1.94575	1.92709	0.505437	0.387412	0.426485		0.204719	0.247283
LmxM.20.1350	263	K	5.4556	0.000184516	Up	coatomer beta subunit, putative OS=Leishmania_mexicana_MHOM/GT/2001/U1103 GN=LmxM.20.1350	LmxM.20.1350	1	4.11473e-06	69.327	2	YVPVLFSVLQSK(1)SAAVR	0.81125	111780	130030	150010	16302	0	0	22061	23643	0	0	64339	45968	0	0	10871	0	0	0	1.56355	1.91723	2.18753	0.292577			0.367053	0.379359			0.973711	0.691977			0.167807
LmxM.20.1650	88	K	6.82669	7.42711e-05	Up	ribosomal protein S11 homolog OS=Leishmania_mexicana_MHOM/GT/2001/U1103 GN=LmxM.20.1650	LmxM.20.1650	1	1.87382e-41	164.56	2	HK(1)SLAVHCSPAFDPK	-3.6547	1360000	827090	879350	283770	263300	250820	89940	95992	97942	671150	683490	704970	172050	152720	162270	36130	45492	56482	3.76135	2.30509	2.42723	0.563024	0.561857	0.507719	0.275137	0.286157	0.294475	1.49337	1.56053	1.5829	0.446867	0.405288	0.434981	0.133338	0.165526	0.205206
LmxM.20.1650	101	K	3.95636	2.69689e-05	Up	ribosomal protein S11 homolog OS=Leishmania_mexicana_MHOM/GT/2001/U1103 GN=LmxM.20.1650	LmxM.20.1650	1	7.04162e-174	206.61	3	SLAVHCSPAFDPK(1)QGDEVVIGQCR	2.0503	289050	268720	266500	87976	100030	93507	0	0	0	233560	233030	229030	49498	44321	48838	0	0	0	1.8732	1.75486	1.72367	0.409009	0.500164	0.44352				1.21774	1.24669	1.20499	0.301245	0.275604	0.306759
LmxM.20.1650	26	K	2.27313	4.2355e-05	Up	ribosomal protein S11 homolog OS=Leishmania_mexicana_MHOM/GT/2001/U1103 GN=LmxM.20.1650	LmxM.20.1650	1	0.000114785	111.39	2	IGLGFK(1)TPAK	-0.75116	229510	217540	223500	131220	138190	129490	0	0	0	205130	203490	205500	71551	64192	68260	0	14297	20395	1.75492	1.6762	1.7056	0.7198	0.815271	0.724683				1.26191	1.2845	1.27569	0.513796	0.470977	0.505882		0.143822	0.204859
LmxM.20.1650	78	K	11.9256	3.88653e-10	Up	ribosomal protein S11 homolog OS=Leishmania_mexicana_MHOM/GT/2001/U1103 GN=LmxM.20.1650	LmxM.20.1650	1	6.39115e-06	138.55	2	RNYLHFIK(1)K	-1.6088	2004800	1894600	1924400	231060	239560	226410	146910	133010	143800	1010800	985380	967470	136960	130490	139180	74748	82671	87821	3.58771	3.4166	3.43705	0.296638	0.330774	0.29655	0.290797	0.256564	0.279757	1.45531	1.45574	1.4056	0.230176	0.224072	0.241408	0.178496	0.194637	0.206453
LmxM.20.1650	116	K	9.49127	0.000192348	Up	ribosomal protein S11 homolog OS=Leishmania_mexicana_MHOM/GT/2001/U1103 GN=LmxM.20.1650	LmxM.20.1650	1	9.43307e-08	125.5	3	QGDEVVIGQCRPLSK(1)TIR	-1.5179	650660	555080	557160	0	0	114520	45463	48215	0	405890	421640	402820	73178	75471	71575	19789	0	23846	2.75982	2.37254	2.35858			0.355521	0.213293	0.220432		1.3851	1.4764	1.38712	0.291492	0.307164	0.29425	0.112004		0.132868
LmxM.20.1650	128	K	7.25108	5.91791e-08	Up	ribosomal protein S11 homolog OS=Leishmania_mexicana_MHOM/GT/2001/U1103 GN=LmxM.20.1650	LmxM.20.1650	1	3.62764e-62	208.35	2	YNVLEVVSK(1)SSADK	0.26141	2387200	2284000	2216800	477760	482400	491630	263560	255170	241160	1838200	1861400	1791300	359930	338110	350780	121330	137090	143320	2.81233	2.71147	2.60644	0.403779	0.438486	0.423909	0.343439	0.324021	0.308858	1.74227	1.81031	1.71326	0.398213	0.382207	0.400535	0.190735	0.212476	0.2218
LmxM.20.1670	189	K	9.57543	4.34294e-08	Up	ribosome biogenesis protein, putative OS=Leishmania_mexicana_MHOM/GT/2001/U1103 GN=LmxM.20.1670	LmxM.20.1670	1	7.05728e-62	196.42	2	VTK(1)SLLHMAFNTPR	0.73258	381450	366780	357120	56647	0	58763	43643	38022	0	282960	288710	281730	73047	69064	73150	30158	30638	37263	2.881	2.67345	2.71932	0.266479		0.291353	0.310886	0.283365		1.88937	1.89667	1.79866	0.520744	0.47005	0.494243	0.207896	0.208167	0.246324
LmxM.20.1690	78	K	4.76957	4.16239e-05	Up	soluble n-ethylmaleimide sensitive factor, putative OS=Leishmania_mexicana_MHOM/GT/2001/U1103 GN=LmxM.20.1690	LmxM.20.1690	1	9.3999e-11	104.04	2	AGAGMAFADAANAYK(1)K	1.7846	67531	71034	78394	0	0	14365	0	12122	13273	57633	64480	61869	16341	11261	12223	0	0	0	1.66825	1.74575	1.9231			0.416846		0.328388	0.373757	1.27716	1.48108	1.4226	0.431554	0.302525	0.326078
LmxM.20.1690	86	K	10.4474	0.0282994	Up	soluble n-ethylmaleimide sensitive factor, putative OS=Leishmania_mexicana_MHOM/GT/2001/U1103 GN=LmxM.20.1690	LmxM.20.1690	1	0.000306908	78.932	2	AK(1)TMVDMAVR	1.2446	264210	257760	264530	23855	0	0	0	20325	0	185760	171150	172430	0	0	0	14665	0	0	1.71113	1.66076	1.70126	0.179374				0.144351		1.0792	1.03063	1.03943				0.079708
LmxM.21.0030	31	K	3.38959	0.000925036	Up	hypothetical protein, conserved OS=Leishmania_mexicana_MHOM/GT/2001/U1103 GN=LmxM.21.0030	LmxM.21.0030	1	1.02117e-15	112.73	2	AGNLK(1)NINHTLSDYR	-1.9256	100910	92601	89440	39725	40083	40068	19531	21741	18559	57408	56732	63042	0	15886	0	0	0	0	1.97098	1.82697	1.8784	0.784352	0.819726	0.740093	0.330939	0.354824	0.319352	1.28092	1.26297	1.37453		0.32997
LmxM.21.0030	129	K	2.82938	1.66479e-06	Up	hypothetical protein, conserved OS=Leishmania_mexicana_MHOM/GT/2001/U1103 GN=LmxM.21.0030	LmxM.21.0030	1	4.74077e-06	90.142	2	NK(1)VMNEYDAYR	6.0498	143620	144030	131020	0	43166	51923	57533	60334	66589	0	106760	0	0	0	0	0	0	0	1.58199	1.60254	1.55179		0.49784	0.540863	0.549768	0.555309	0.646185		1.34033
LmxM.21.0250	407	K	5.46322	0.00175497	Up	hexokinase, putative OS=Leishmania_mexicana_MHOM/GT/2001/U1103 GN=LmxM.21.0250	LmxM.21.0250	1	2.09749e-93	190.87	2	AAQQGSVFTAAPMLK(1)TR	-1.9446	840120	828690	862020	328500	0	0	0	156750	165970	691200	0	708030	0	0	270210	161990	171730	0	2.0833	2.05871	2.17632	0.581689				0.277965	0.296867	1.74034		1.78007			0.640092	0.339622	0.364887
LmxM.21.0250	171	K	1.68081	3.14011e-05	Up	hexokinase, putative OS=Leishmania_mexicana_MHOM/GT/2001/U1103 GN=LmxM.21.0250	LmxM.21.0250	1	0.00167696	77.072	2	AVNK(1)GLLIK	0.53363	94511	83998	76897	0	73188	71906	68328	69428	74406	0	55756	63431	45569	41607	0	0	0	33108	1.6854	1.50066	1.39613		0.935304	0.894787	0.871081	0.885375	0.957083		0.997582	1.14682	0.770559	0.712888				0.497099
LmxM.21.0250	152	K	2.14379	3.37115e-06	Up	hexokinase, putative OS=Leishmania_mexicana_MHOM/GT/2001/U1103 GN=LmxM.21.0250	LmxM.21.0250	1	2.55675e-17	145.95	2	MMSENAPEDLEK(1)R	0.18477	176690	141720	146750	97961	101760	94014	102400	107870	107940	83837	86104	89905	59303	54839	54758	27826	26454	27303	2.34192	1.88185	1.98032	0.927169	0.966564	0.869536	0.970288	1.02243	1.03196	1.12828	1.14504	1.20815	0.745339	0.698369	0.693329	0.311824	0.300437	0.304692
LmxM.21.0250	167	K	1.97506	0.00115514	Up	hexokinase, putative OS=Leishmania_mexicana_MHOM/GT/2001/U1103 GN=LmxM.21.0250	LmxM.21.0250	1	1.31712e-16	96.27	3	RVPLGFTFSFPVDQK(1)AVNK	-0.67968	46283	53468	57190	0	28642	33036	43024	42608	39632	45850	43296	41551	39760	34077	28784	14003	16099	18617	1.46938	1.7006	1.84854		0.651644	0.731873	0.976483	0.967337	0.907573	1.47799	1.37911	1.33743	1.19695	1.03947	0.872964	0.375866	0.43794	0.497638
LmxM.21.0340	245	K	5.78597	6.16473e-11	Up	mitochondrial processing peptidase alpha subunit, putative OS=Leishmania_mexicana_MHOM/GT/2001/U1103 GN=LmxM.21.0340	LmxM.21.0340	1	1.17847e-22	169.57	3	LPYK(1)HSAEAPHHAR	-0.24729	294990	306040	306490	59338	57615	63045	64120	60186	57296	198970	192230	203200	88689	108310	105510	45329	49393	51814	2.34888	2.47077	2.47671	0.413291	0.400673	0.432355	0.449189	0.419704	0.406873	1.66848	1.64139	1.75191	0.683247	0.840452	0.834881	0.392045	0.439567	0.45526
LmxM.21.0340	119	K	8.87509	3.7389e-08	Up	mitochondrial processing peptidase alpha subunit, putative OS=Leishmania_mexicana_MHOM/GT/2001/U1103 GN=LmxM.21.0340	LmxM.21.0340	1	2.39346e-34	161.23	2	STGNAYGHGEVCK(1)R	-0.42141	73937	82703	90086	9372	12830	10635	10746	9144.7	11364	53321	52235	55664	6692.3	10671	10922	0	0	0	2.26765	2.5718	2.80401	0.251431	0.343671	0.280924	0.289964	0.245629	0.310834	1.72224	1.71796	1.84852	0.198585	0.318942	0.332886
LmxM.21.0380	113	K	2.21044	5.05021e-05	Up	Protein of unknown function (DUF667), putative OS=Leishmania_mexicana_MHOM/GT/2001/U1103 GN=LmxM.21.0380	LmxM.21.0380	0.994716	1.20565e-11	86.798	3	ASNYQSTTK(0.995)VK(0.005)PFICTMPMR	0.075498	0	103540	101190	39122	42626	0	44857	43535	0	65137	64233	65597	0	0	36579	0	0	0		1.48782	1.4511	0.654787	0.720503		0.650762	0.633069		1.2071	1.17679	1.23389			0.633386
LmxM.21.0430	127	K	5.04678	3.19362e-12	Up	hypothetical protein, conserved OS=Leishmania_mexicana_MHOM/GT/2001/U1103 GN=LmxM.21.0430	LmxM.21.0430	1	2.92627e-81	209.43	2	TK(1)TYHIASDYLR	-0.22953	1112100	1120600	1122000	195690	184990	193450	186110	185430	192610	783540	798860	796390	200880	207230	200550	173810	180630	190710	2.35064	2.4356	2.35523	0.468469	0.456556	0.473137	0.469019	0.470126	0.4928	1.56537	1.63065	1.62276	0.501153	0.508248	0.49244	0.349081	0.365966	0.371304
LmxM.21.0490	223	K	15.6356	0.0214806	Up	DnaJ protein, putative OS=Leishmania_mexicana_MHOM/GT/2001/U1103 GN=LmxM.21.0490	LmxM.21.0490	1	5.721e-126	200.13	3	GASK(1)SDHFTFTGEGNQEPGIR	2.0696	236360	239620	234830	17706	14611	0	0	0	0	130630	154880	147320	0	0	0	0	0	0	1.68266	1.73672	1.64158	0.119306	0.0964823					0.797444	0.932538	0.904433
LmxM.21.0540	236	K	2.64038	0.0011512	Up	Lupus La protein homolog, putative OS=Leishmania_mexicana_MHOM/GT/2001/U1103 GN=LmxM.21.0540	LmxM.21.0540	1	2.09636e-07	101.64	2	FSDVK(1)GLWPAEEQK	0.49272	190330	278110	290740	0	72265	76307	93319	102740	130990	217220	221790	187910	133950	124610	120740	26792	0	39800	1.23932	1.85165	1.94594		0.505873	0.517755	0.611401	0.679402	0.864982	1.3419	1.39336	1.19058	0.893746	0.837747	0.806641	0.243449		0.379621
LmxM.21.0540	231	K	2.8998	2.29425e-05	Up	Lupus La protein homolog, putative OS=Leishmania_mexicana_MHOM/GT/2001/U1103 GN=LmxM.21.0540	LmxM.21.0540	1	3.03269e-07	124.06	2	ISGCGAIEK(1)FSDVK	3.7823	134190	123380	130090	39560	43131	40397	52073	0	0	169320	136440	159990	0	42977	46147	22845	22255	29659	1.58522	1.49032	1.57965	0.476464	0.547767	0.497281	0.618958			1.89767	1.55509	1.83906		0.52419	0.559326	0.376606	0.385799	0.513236
LmxM.21.0540	74	K	6.95097	4.45441e-06	Up	Lupus La protein homolog, putative OS=Leishmania_mexicana_MHOM/GT/2001/U1103 GN=LmxM.21.0540	LmxM.21.0540	1	1.1739e-07	133.76	2	LVMNK(1)DGLSVR	0.24139	894690	768880	780970	110130	119610	0	115720	0	0	527230	537460	547610	0	0	0	0	0	0	1.71773	1.50941	1.54122	0.215572	0.246881		0.223548			0.960344	0.995573	1.02303
LmxM.21.0540	276	K	9.43375	6.88556e-06	Up	Lupus La protein homolog, putative OS=Leishmania_mexicana_MHOM/GT/2001/U1103 GN=LmxM.21.0540	LmxM.21.0540	1	0.00105905	94.806	2	MVESVK(1)TR	1.7636	335440	334010	315660	33474	0	0	0	0	36131	259690	254030	258470	0	0	0	0	0	0	1.37946	1.40449	1.33432	0.140348					0.150683	1.01319	1.00791	1.03428
LmxM.21.0540	152	K	10.8893	2.29306e-07	Up	Lupus La protein homolog, putative OS=Leishmania_mexicana_MHOM/GT/2001/U1103 GN=LmxM.21.0540	LmxM.21.0540	1	2.24232e-53	200.46	2	TKPSVFVVFASK(1)ADAEK	-0.3726	1678800	1688600	1696700	145440	153330	153320	0	0	0	1222400	1292100	1287000	229980	198360	206240	87895	93278	106550	2.30946	2.37523	2.39919	0.203986	0.226765	0.219783				1.5954	1.71495	1.72275	0.324187	0.28174	0.291096	0.168734	0.188302	0.214712
LmxM.21.0540	133	K	2.30887	0.000251272	Up	Lupus La protein homolog, putative OS=Leishmania_mexicana_MHOM/GT/2001/U1103 GN=LmxM.21.0540	LmxM.21.0540	1	5.05334e-28	140.01	2	YFQGGSK(1)DAPLESR	-0.055134	239770	239520	236630	86913	79285	75016	117130	126650	130200	187400	217380	209040	135590	136720	139550	41793	43664	51338	1.62541	1.66026	1.64886	0.600699	0.577824	0.529913	0.798941	0.871933	0.895097	1.20526	1.42178	1.37889	0.941867	0.956935	0.97062	0.395365	0.434365	0.509797
LmxM.21.0550	305	K	5.87732	1.3203e-06	Up	dihydrolipoamide acetyltransferase precursorlike protein OS=Leishmania_mexicana_MHOM/GT/2001/U1103 GN=LmxM.21.0550	LmxM.21.0550	1	1.0821e-92	148.22	2	FLK(1)SDFSGQPGFDYNDTAPPR	-1.6487	374900	378090	373000	78590	88285	83821	0	0	0	149880	152330	143040	23388	22844	21721	0	0	0	2.52956	2.37248	2.33657	0.388331	0.430098	0.41319				1.18506	1.12035	1.1226	0.146253	0.142202	0.133547
LmxM.21.0550	262	K	5.02493	2.37094e-09	Up	dihydrolipoamide acetyltransferase precursorlike protein OS=Leishmania_mexicana_MHOM/GT/2001/U1103 GN=LmxM.21.0550	LmxM.21.0550	1	1.75657e-154	181.35	3	PASSAASAK(1)HYGGSLDAAVAASGPSVAR	-0.239	309010	317420	302700	76894	74352	81927	61436	65260	61860	202790	208390	204100	96457	87400	87974	0	0	0	2.20087	2.10249	2.00159	0.401069	0.382354	0.426301	0.41297	0.463725	0.423047	1.69253	1.61784	1.69085	0.636704	0.574297	0.570954
LmxM.21.0640	242	K	6.62043	2.16855e-07	Up	phosphoglucomutase, putative OS=Leishmania_mexicana_MHOM/GT/2001/U1103 GN=LmxM.21.0640	LmxM.21.0640	1	2.13027e-07	93.772	2	IFHEGLGVPK(1)TSLFR	0.86159	255800	268080	273010	38200	41167	38869	34036	38420	32344	184320	178810	180020	67035	0	55590	0	0	0	2.02301	2.11384	2.20272	0.346895	0.377393	0.372796	0.270663	0.297184	0.25022	1.43952	1.46698	1.48593	0.559951		0.463853
LmxM.34.1920	58	K	31.5733	0.000272112	Up	60S ribosomal protein L36, putative OS=Leishmania_mexicana_MHOM/GT/2001/U1103 GN=LmxM.34.1920	LmxM.34.1920	1	9.5541e-23	157.74	2	AIIADLVGLSPLEK(1)R	-1.0871	588490	374500	313820	17189	0	18155	5626.4	0	0	346780	496740	455030	13581	0	0	0	0	0	1.99837	1.28798	1.03962	0.0555879		0.0527761	0.0286497			1.04248	1.38999	1.29121	0.0571155
LmxM.34.1920	38	K	23.5539	2.63034e-09	Up	60S ribosomal protein L36, putative OS=Leishmania_mexicana_MHOM/GT/2001/U1103 GN=LmxM.34.1920	LmxM.34.1920	1	0.000115237	113.14	2	FAVPHK(1)HLR	-0.42247	9826300	8404900	8487400	462000	488970	471820	219990	219840	223770	6214500	6345200	6305800	364510	369510	377120	157130	153860	165360	3.20675	2.77798	2.70212	0.143585	0.135906	0.131812	0.107654	0.107863	0.110794	1.79538	1.70634	1.71963	0.147322	0.148257	0.135625	0.0940528	0.0873297	0.109932
LmxM.34.1920	87	K	17.4896	0.0001455	Up	60S ribosomal protein L36, putative OS=Leishmania_mexicana_MHOM/GT/2001/U1103 GN=LmxM.34.1920	LmxM.34.1920	1	0.00600508	54.436	2	LGDFTAAK(1)K	-0.054831	0	737190	736630	50731	49180	0	23653	0	0	624290	640520	641660	0	42281	0	0	0	0		1.69226	1.62881	0.109504	0.094937		0.0803903			1.25264	1.19631	1.21532		0.117822
LmxM.34.1920	16	K	7.66135	0.000335368	Up	60S ribosomal protein L36, putative OS=Leishmania_mexicana_MHOM/GT/2001/U1103 GN=LmxM.34.1920	LmxM.34.1920	1	2.25129e-49	186.39	2	TGIIAGFNK(1)GHVTTR	-0.67768	973490	950830	1005200	214120	222280	212500	41109	41274	41312	1057600	1029800	1063800	118300	112000	117270	0	0	0	1.81099	1.79146	1.82428	0.379344	0.35218	0.338413	0.114676	0.115439	0.1166	1.74173	1.57864	1.65372	0.272554	0.256164	0.240412
LmxM.21.0760	454	K	8.39113	3.44108e-06	Up	proteasome regulatory non-ATP-ase subunit 5, putative OS=Leishmania_mexicana_MHOM/GT/2001/U1103 GN=LmxM.21.0760	LmxM.21.0760	1	6.95464e-28	162.23	2	SVALLDK(1)ASHLITK	1.5539	408730	424400	415850	44009	29563	26375	56920	52653	61398	216080	289660	248140	69349	92898	83793	65295	56570	37218	2.57282	2.63488	2.60122	0.340834	0.227017	0.201008	0.357362	0.339519	0.395494	1.43914	1.91261	1.63656	0.458856	0.619809	0.569923	0.447656	0.386311	0.255998
LmxM.21.0800	1930	K	6.71989	3.15679e-07	Up	CCR4-NOT transcription complex subunit 1 OS=Leishmania_mexicana_MHOM/GT/2001/U1103 GN=LmxM.21.0800	LmxM.21.0800	1	0.00416225	88.35	2	FLTK(1)GNR	0.050027	157470	131780	131870	21628	19753	19473	17213	21954	0	68501	72402	77424	32636	33790	32253	0	0	0	2.53832	2.13168	2.15434	0.368326	0.342277	0.330484	0.281384	0.370104		1.01609	1.07674	1.15649	0.524237	0.54981	0.525627
LmxM.21.0800	2094	K	5.55575	1.463e-06	Up	CCR4-NOT transcription complex subunit 1 OS=Leishmania_mexicana_MHOM/GT/2001/U1103 GN=LmxM.21.0800	LmxM.21.0800	1	1.10019e-15	117.41	2	IPANFAK(1)SNVLACYR	-0.21457	362470	345700	364820	64056	65016	62976	0	52697	0	233170	239200	230210	0	93917	92087	0	55757	0	2.01025	1.92398	2.05057	0.375322	0.387608	0.367724		0.30565		1.18998	1.22391	1.18309		0.525772	0.516338		0.381647
LmxM.21.0800	1697	K	6.44874	7.08793e-08	Up	CCR4-NOT transcription complex subunit 1 OS=Leishmania_mexicana_MHOM/GT/2001/U1103 GN=LmxM.21.0800	LmxM.21.0800	1	9.91957e-23	148.76	3	RIPSVVFVK(1)TLQQR	-0.1409	217740	218870	217530	0	0	0	33126	33738	31418	134200	143520	128540	0	32388	38618	0	21007	18246	2.15269	2.17147	2.17962				0.332128	0.348837	0.327569	1.22091	1.30908	1.1776		0.323223	0.386004		0.256326	0.22343
LmxM.21.0800	314	K	2.71028	3.24052e-09	Up	CCR4-NOT transcription complex subunit 1 OS=Leishmania_mexicana_MHOM/GT/2001/U1103 GN=LmxM.21.0800	LmxM.21.0800	1	5.61589e-22	152.23	2	VK(1)HISVIFDAYHR	0.092964	109960	107760	111770	38573	35734	36855	41770	40481	39702	92652	92994	90481	61765	51179	58627	18637	16154	18627	1.79565	1.76591	1.84982	0.665481	0.627282	0.633653	0.691742	0.69135	0.683722	1.39229	1.40104	1.36918	1.0051	0.843633	0.967926	0.371303	0.325575	0.376756
LmxM.21.0810	525	K	2.7276	3.07281e-06	Up	methionyl-tRNA synthetase, putative OS=Leishmania_mexicana_MHOM/GT/2001/U1103 GN=LmxM.21.0810	LmxM.21.0810	1	1.62955e-22	119.79	2	ISK(1)SLGNAFDPVEK	0.92792	92116	81526	86795	43329	42586	41838	26107	0	31915	80222	86312	81021	30683	30977	34857	17526	14031	21721	1.93624	1.72957	1.84011	0.711673	0.714729	0.685987	0.569667		0.682267	1.51765	1.63593	1.51377	0.667317	0.673105	0.754496	0.387814	0.319055	0.489542
LmxM.21.0820	967	K	5.20794	0.0153103	Up	Temperature dependent protein affecting M2 dsRNA replication, putative OS=Leishmania_mexicana_MHOM/GT/2001/U1103 GN=LmxM.21.0820	LmxM.21.0820	1	0.00428747	69.716	2	LGK(1)ISWVR	-1.6592	52769	52735	0	14491	0	15839	0	0	0	33838	36307	30519	0	0	0	0	0	0	1.46584	1.48688		0.270425		0.296539				0.98257	1.09049	0.89162
LmxM.21.0840	310	K	13.9845	0.000310744	Up	metallo-peptidase, Clan MG, Family M24 OS=Leishmania_mexicana_MHOM/GT/2001/U1103 GN=LmxM.21.0840	LmxM.21.0840	1	0.00120845	114.64	2	VHQVK(1)SIR	2.3543	201260	145430	189370	13639	15687	0	0	0	0	76853	91416	108980	14897	0	0	0	0	0	2.16909	1.61611	2.10939	0.128263	0.152744					0.7043	0.841714	1.03616	0.15983
LmxM.21.0845	150	K	3.5965	5.70529e-06	Up	hypoxanthine-guanine phosphoribosyltransferase OS=Leishmania_mexicana_MHOM/GT/2001/U1103 GN=LmxM.21.0845	LmxM.21.0845	0.999999	3.39805e-16	146.48	3	KPASLK(1)TVVLLDKPSGR	-0.23587	370680	304230	298660	127570	130250	0	65730	67776	71862	199500	198830	214110	79813	81475	83759	0	0	15193	2.04759	1.63737	1.67377	0.550324	0.561886		0.445677	0.44024	0.48518	1.12593	1.13413	1.24928	0.565268	0.573321	0.577107			0.358379
LmxM.21.0850	176	K	1.54669	1.71653e-05	Up	xanthine phosphoribosyltransferase OS=Leishmania_mexicana_MHOM/GT/2001/U1103 GN=LmxM.21.0850	LmxM.21.0850	1	4.79097e-40	158.57	2	SIK(1)TLVMVNK	-1.7763	100990	85569	84998	57538	58032	60660	61005	61224	61277	81015	80605	80923	49792	43433	47761	16939	16703	21096	1.59193	1.34248	1.37249	0.880477	0.90946	0.904117	0.950853	0.947952	0.976329	1.38153	1.3661	1.35765	0.850609	0.728303	0.800467	0.37873	0.365925	0.446634
LmxM.21.0850	125	K	3.34577	0.00261524	Up	xanthine phosphoribosyltransferase OS=Leishmania_mexicana_MHOM/GT/2001/U1103 GN=LmxM.21.0850	LmxM.21.0850	1	1.83634e-189	225.94	2	LASYNSGTK(1)STGQISMLAGLK	-0.88393	523590	504630	473950	193480	160310	183340	0	83207	0	349680	389160	366870	180780	160920	171270	60076	71980	73204	1.98831	1.90726	1.84366	0.713256	0.605234	0.658303		0.310364		1.43652	1.5889	1.48277	0.74399	0.650053	0.691509	0.323586	0.379888	0.373364
LmxM.21.0895	151	K	1.76314	0.0108243	Up	aspartyl-tRNA synthetase, putative OS=Leishmania_mexicana_MHOM/GT/2001/U1103 GN=LmxM.21.0895	LmxM.21.0895	1	0.000763509	102.46	2	GK(1)LAFLHLR	0.13501	35492	28370	28147	0	0	0	17557	0	21058	19828	0	20436	18333	15664	15617	0	0	0	1.49423	1.23538	1.24655				0.691753		0.811685	0.842257		0.899643	0.774082	0.698222	0.661369
LmxM.21.0980	1476	K	3.63779	4.77834e-06	Up	intraflagellar transport protein 172, putative OS=Leishmania_mexicana_MHOM/GT/2001/U1103 GN=LmxM.21.0980	LmxM.21.0980	1	1.00309e-44	159.12	2	AYISK(1)ADFSNALR	0.15431	243830	237630	239640	0	56600	59243	60783	0	0	151920	160760	146200	59829	0	59674	0	40862	0	1.77618	1.78767	1.79191		0.497388	0.519353	0.455513			1.26474	1.36462	1.25292	0.462508		0.470226		0.312408
LmxM.21.0980	1785	K	6.19403	0.000290784	Up	intraflagellar transport protein 172, putative OS=Leishmania_mexicana_MHOM/GT/2001/U1103 GN=LmxM.21.0980	LmxM.21.0980	1	0.00370755	88.35	2	FVLTAK(1)R	-1.6656	48279	52351	44086	0	0	0	8388.5	0	6979.5	0	27020	22588	0	0	0	0	0	0	1.48413	1.66197	1.39113				0.265287		0.223058		0.967901	0.816893
LmxM.21.1050	85	K	4.3308	3.1545e-07	Up	60S ribosomal protein L9, putative OS=Leishmania_mexicana_MHOM/GT/2001/U1103 GN=LmxM.21.1050	LmxM.21.1050	1	6.42038e-71	163.93	2	AHVQNMITGVTK(1)GFR	-1.5386	938960	790100	0	234550	231380	229750	187360	191240	201950	613510	619440	0	192580	169730	185010	94377	87749	109900	2.99283	2.49952		0.609039	0.602814	0.618604	0.626735	0.642649	0.704788	1.65665	1.69621		0.610108	0.534684	0.577835	0.400614	0.382929	0.460376
LmxM.21.1050	167	K	3.51627	4.70729e-05	Up	60S ribosomal protein L9, putative OS=Leishmania_mexicana_MHOM/GT/2001/U1103 GN=LmxM.21.1050	LmxM.21.1050	1	9.88616e-45	187.85	2	EAAVLHQMCLVK(1)K	-0.015951	453330	405690	415080	187830	178390	184690	84734	84168	87209	521820	514110	512040	128880	124560	140430	26383	27893	28285	2.01044	1.78571	1.88003	0.678603	0.64665	0.691898	0.394372	0.393535	0.423465	1.96052	1.95874	1.98119	0.568097	0.545957	0.610253	0.155821	0.169361	0.164859
LmxM.21.1050	36	K	13.1635	0.00260366	Up	60S ribosomal protein L9, putative OS=Leishmania_mexicana_MHOM/GT/2001/U1103 GN=LmxM.21.1050	LmxM.21.1050	1	6.18209e-59	200.9	3	RGTLTK(1)DLTHLQLDLR	-0.70468	1501900	1317500	1118400	220710	69841	141800	0	41359	0	818370	1418100	1092900	86741	103570	116580	0	0	0	2.45404	2.13664	1.86635	0.29379	0.0932767	0.195721		0.0712476		1.13283	1.99063	1.55799	0.140872	0.167254	0.186654
LmxM.21.1050	73	K	26.2305	0.000428869	Up	60S ribosomal protein L9, putative OS=Leishmania_mexicana_MHOM/GT/2001/U1103 GN=LmxM.21.1050	LmxM.21.1050	1	2.33139e-213	250.26	3	IPIACLNTTK(1)AHVQNMITGVTK	-0.15039	4702800	3885700	4540700	0	246870	257310	80009	0	0	2776000	4257200	3108600	116150	222380	162270	164480	117180	0	2.70307	2.21672	2.66551		0.115982	0.124934	0.0482627			1.35174	2.10218	1.55887	0.066356	0.126328	0.0913931	0.125904	0.0922138
LmxM.21.1050	118	K	9.10506	1.04321e-05	Up	60S ribosomal protein L9, putative OS=Leishmania_mexicana_MHOM/GT/2001/U1103 GN=LmxM.21.1050	LmxM.21.1050	1	0.00421406	113.1	2	NFLGEK(1)R	0.052497	695250	626440	620360	100920	0	94031	0	58199	57206	478640	503910	511570	72254	65769	61917	15690	0	0	2.48491	2.22223	2.26448	0.293847		0.283898		0.219303	0.223867	1.44928	1.54727	1.59521	0.256679	0.232324	0.216847	0.0746822
LmxM.21.1050	140	K	8.84605	1.1748e-05	Up	60S ribosomal protein L9, putative OS=Leishmania_mexicana_MHOM/GT/2001/U1103 GN=LmxM.21.1050	LmxM.21.1050	1	1.60568e-42	190.06	2	VK(1)DEIVFEGNDLEQVSR	-0.87983	1061100	959580	919030	119200	137080	0	0	0	113770	603490	655710	588470	109100	108890	105120	71369	81943	0	2.66718	2.39396	2.35928	0.244088	0.281638				0.313114	1.28511	1.41596	1.29052	0.272571	0.270512	0.258913	0.238908	0.281999
LmxM.21.1050	5	K	4.67552	2.06831e-08	Up	60S ribosomal protein L9, putative OS=Leishmania_mexicana_MHOM/GT/2001/U1103 GN=LmxM.21.1050	LmxM.21.1050	1	9.52175e-57	159.75	2	VK(1)SLCTLQIPEGVTVDVK	-2.1597	1089600	999140	988050	258670	258180	230030	225110	235390	202250	286280	671340	510840	147430	150110	111940	0	0	0	2.59762	2.36415	2.40571	0.502377	0.5031	0.46325	0.563217	0.591639	0.527931	0.578195	1.37498	1.06252	0.349345	0.353689	0.261498
LmxM.21.1060	48	K	10.3476	6.00637e-07	Up	40S ribosomal protein S23, putative OS=Leishmania_mexicana_MHOM/GT/2001/U1103 GN=LmxM.21.1060	LmxM.21.1060	1	1.8701e-80	193.56	3	K(1)ANPFGGSSHAK(1)GIVLEK	0.41781	1628000	1597600	1606900	228530	228700	227130	131800	133910	133010	1282200	1283400	1280500	210560	218970	226090	0	0	0	2.25634	2.14819	2.25748	0.261804	0.250787	0.243892	0.15549	0.187231	0.188442	1.85651	1.9455	1.86664	0.321152	0.313064	0.350431
LmxM.21.1060	124	K	9.89868	9.18563e-06	Up	40S ribosomal protein S23, putative OS=Leishmania_mexicana_MHOM/GT/2001/U1103 GN=LmxM.21.1060	LmxM.21.1060	1	9.23773e-89	244.45	2	IVK(1)VSNVGLYALYR	-0.10305	1770200	1894300	1789800	285770	302070	285720	133550	138150	142750	1605800	1807900	1722200	243020	237140	216920	39750	46391	44184	2.41386	2.50607	2.47389	0.3221	0.325902	0.301859	0.155014	0.190045	0.19898	2.28756	2.6964	2.47005	0.364685	0.333576	0.330797	0.0796431	0.104789	0.115701
LmxM.21.1060	37	K	12.8557	0.00029653	Up	40S ribosomal protein S23, putative OS=Leishmania_mexicana_MHOM/GT/2001/U1103 GN=LmxM.21.1060	LmxM.21.1060	1	4.33193e-18	99.909	3	K(1)ANPFGGSSHAK(1)GIVLEK	0.41781	316550	297420	160920	25254	0	27033	21074	0	0	106010	106180	115120	22422	25031	0	0	0	0	2.74042	2.49804	1.41211	0.180713		0.181319	0.155296			0.958766	1.00539	1.04823	0.213616	0.223539
LmxM.21.1060	76	K	8.45167	6.15948e-07	Up	40S ribosomal protein S23, putative OS=Leishmania_mexicana_MHOM/GT/2001/U1103 GN=LmxM.21.1060	LmxM.21.1060	1	9.72493e-11	162.59	2	VQLIK(1)NDK(1)K	-1.9508	1606600	1504400	1570200	269830	283800	271810	153800	154910	153440	1248900	1320300	1316000	226060	224160	219530	84187	82394	82903	2.58374	2.34725	2.55965	0.358685	0.361112	0.338672	0.21054	0.251324	0.252245	2.09826	2.32237	2.22601	0.400082	0.371876	0.394826	0.198933	0.219497	0.256031
LmxM.21.1080	21	K	3.68026	1.50006e-07	Up	cell division protein kinase 2 OS=Leishmania_mexicana_MHOM/GT/2001/U1103 GN=LmxM.21.1080	LmxM.21.1080	1	2.25784e-17	127.93	2	IGEGTYGVVYK(1)AR	-0.26679	144300	146830	148210	40642	43527	49948	48398	0	49711	100180	0	0	32494	26283	30702	0	0	0	1.99523	2.0946	2.05292	0.498301	0.53624	0.610888	0.556141		0.580273	1.32643			0.475786	0.386383	0.453399
LmxM.21.1090	282	K	2.73143	2.6172e-06	Up	T-complex protein 1, delta subunit, putative OS=Leishmania_mexicana_MHOM/GT/2001/U1103 GN=LmxM.21.1090	LmxM.21.1090	1	0.00136618	79.809	2	K(1)YLLGLCK	-0.41358	168770	142920	141480	54464	57014	58214	48418	45689	44891	134310	128720	126550	60862	59225	60967	28010	31488	31835	2.03599	1.73334	1.71258	0.706834	0.74543	0.737422	0.64024	0.605237	0.578781	1.47306	1.46444	1.40374	0.762464	0.749169	0.771006	0.394863	0.463215	0.46393
LmxM.21.1250	77	K	4.62628	8.40075e-08	Up	adenylate kinase, putative OS=Leishmania_mexicana_MHOM/GT/2001/U1103 GN=LmxM.21.1250	LmxM.21.1250	1	1.26882e-68	206.03	2	GTQAHHICSYYK(1)R	-1.5962	610250	634570	652650	131320	130720	133250	126330	125100	134630	496580	515000	531280	186760	181600	174370	76783	74802	85695	2.09719	2.25227	2.29656	0.520935	0.511675	0.536471	0.412762	0.427803	0.463513	1.83133	1.94774	1.98985	0.608551	0.581255	0.573691	0.302733	0.28619	0.330792
LmxM.21.1552	81	K	5.34326	1.77596e-07	Up	ATP-dependent RNA helicase SUB2, putative OS=Leishmania_mexicana_MHOM/GT/2001/U1103 GN=LmxM.21.1552	LmxM.21.1552	1	5.74067e-55	177.41	2	AMLGADILAQAK(1)SGMGK	1.0644	471350	449180	448790	102390	91532	84581	73899	75141	79366	220710	312220	275720	62373	60999	61817	0	0	0	2.42401	2.28042	2.32592	0.540939	0.469437	0.448676	0.371543	0.389232	0.411659	1.07236	1.6102	1.37055	0.314643	0.310328	0.304332
LmxM.21.1552	129	K	6.84309	3.13973e-11	Up	ATP-dependent RNA helicase SUB2, putative OS=Leishmania_mexicana_MHOM/GT/2001/U1103 GN=LmxM.21.1552	LmxM.21.1552	1	1.77187e-95	203.52	2	ELAYQIEQEFK(1)R	0.51637	338110	321170	312880	46325	49920	44050	46877	45586	48663	222640	225110	209740	42402	40454	44443	17410	19229	21598	2.85632	2.67846	2.66371	0.402033	0.420567	0.383851	0.387157	0.387899	0.414627	1.77695	1.90709	1.71264	0.35137	0.338077	0.359418	0.172619	0.18865	0.208385
LmxM.21.1552	394	K	2.84655	0.00075367	Up	ATP-dependent RNA helicase SUB2, putative OS=Leishmania_mexicana_MHOM/GT/2001/U1103 GN=LmxM.21.1552	LmxM.21.1552	0.985911	6.481e-22	138	2	GLTIAFITTDEK(0.014)EIK(0.986)R	0.11076	61566	59550	49889	18108	17511	0	0	0	23674	35209	54609	0	0	11354	16374	0	0	0	1.7416	1.663	1.42224	0.526232	0.494005				0.675446	0.940994	1.54917			0.317734	0.443416
LmxM.21.1552	172	K	7.5554	1.30054e-07	Up	ATP-dependent RNA helicase SUB2, putative OS=Leishmania_mexicana_MHOM/GT/2001/U1103 GN=LmxM.21.1552	LmxM.21.1552	1	4.7338e-07	97.033	2	MK(1)ALIQNK(1)AFDTTR	-1.7936	176970	153980	155040	21692	21197	21334	0	0	20028	72256	108700	109780	18702	21470	0	0	0	10858	2.4822	2.13208	2.1915	0.312562	0.2965	0.308659			0.283326	0.957495	1.52896	1.48832	0.25731	0.297904				0.173937
LmxM.21.1552	186	K	5.26598	0.00132136	Up	ATP-dependent RNA helicase SUB2, putative OS=Leishmania_mexicana_MHOM/GT/2001/U1103 GN=LmxM.21.1552	LmxM.21.1552	1	5.67891e-05	64.906	2	VK(1)WFVVDEFDR	0.043974	71088	100440	79169	0	0	0	17550	0	14372	43315	0	48162	0	0	0	0	0	8940.2	1.46096	2.03775	1.63968				0.352614		0.2979	0.841019		0.956717						0.209843
LmxM.21.1555	92	K	12.919	3.18426e-08	Up	hypothetical protein, conserved OS=Leishmania_mexicana_MHOM/GT/2001/U1103 GN=LmxM.21.1555	LmxM.21.1555	1	2.04479e-179	273.07	2	ELAQLMQYK(1)HDLWR	0.0035066	1613800	1665800	1793400	153550	116790	108430	145970	147840	151770	698780	936690	880460	197170	227040	237070	134290	113000	112780	3.06005	3.23167	3.42625	0.274846	0.213513	0.192193	0.267642	0.275884	0.28037	1.5187	2.09097	1.91031	0.343859	0.40191	0.430258	0.261344	0.227486	0.222416
LmxM.21.1700	90	K	1.97686	2.00035e-07	Up	proteasome alpha 2 subunit, putative OS=Leishmania_mexicana_MHOM/GT/2001/U1103 GN=LmxM.21.1700	LmxM.21.1700	1	7.34452e-09	131.3	2	K(1)YCQQYR	-0.25411	165890	163370	171250	69059	67137	72688	77335	84582	82519	140670	142010	147560	80200	84480	80879	36170	37300	43097	1.65115	1.62176	1.66894	0.860773	0.813576	0.851688	0.748715	0.868241	0.856722	1.45756	1.48708	1.55505	0.844755	0.884093	0.862059	0.327154	0.346004	0.400221
LmxM.34.2050	92	K	8.33585	2.04194e-05	Up	60S ribosomal protein L32 OS=Leishmania_mexicana_MHOM/GT/2001/U1103 GN=LmxM.34.2050	LmxM.34.2050	1	1.43446e-17	145.95	2	K(1)YAGVISHTVGAR	-0.96711	196900	143240	145300	40237	36917	35715	0	0	0	151580	158120	166280	0	0	0	0	0	7695.6	1.72289	1.66419	1.63586	0.176699	0.188059	0.237814				0.781037	0.896175	0.964856						0.149431
LmxM.21.1760	171	K	6.99869	0.000332822	Up	centromere/microtubule binding protein cbf5, putative OS=Leishmania_mexicana_MHOM/GT/2001/U1103 GN=LmxM.21.1760	LmxM.21.1760	1	7.03788e-08	88.42	3	LTGPCFQRPPLIAAVK(1)R	-1.7107	818170	785990	0	0	120890	115540	0	0	99138	428330	452610	444170	0	0	0	0	0	0	2.04928	1.89272			0.312342	0.291442			0.241087	0.980843	1.09062	1.00639
LmxM.21.1760	189	K	3.73633	1.05559e-07	Up	centromere/microtubule binding protein cbf5, putative OS=Leishmania_mexicana_MHOM/GT/2001/U1103 GN=LmxM.21.1760	LmxM.21.1760	1	3.40424e-103	240.94	2	NIYSNQLIEYDK(1)HR	-1.553	1890500	1792900	1800600	479980	502410	517520	431050	443520	476670	1082400	1076800	1104600	569150	515300	548610	196090	214610	235790	2.50632	2.28521	2.26011	0.657155	0.687069	0.690953	0.551512	0.574385	0.613554	1.31193	1.37336	1.32472	0.692967	0.62887	0.674159	0.276321	0.305134	0.341098
LmxM.21.1760	132	K	5.16064	5.28568e-09	Up	centromere/microtubule binding protein cbf5, putative OS=Leishmania_mexicana_MHOM/GT/2001/U1103 GN=LmxM.21.1760	LmxM.21.1760	1	6.37072e-42	169.57	2	SQQNAGK(1)TYVGVLR	-0.36933	576330	576640	591140	113590	118270	107770	107460	100570	108480	361800	343070	382490	139420	152580	163060	71462	88009	97980	2.52471	2.4286	2.45179	0.513884	0.534438	0.475445	0.454312	0.430367	0.461387	1.44901	1.44582	1.51572	0.560908	0.615289	0.662105	0.332747	0.413474	0.468352
LmxM.21.1770	107	K	7.37532	0.000105895	Up	ATP synthase F1 subunit gamma protein, putative OS=Leishmania_mexicana_MHOM/GT/2001/U1103 GN=LmxM.21.1770	LmxM.21.1770	1	0.000758073	100.75	2	AYLMPLGK(1)R	-1.4729	399720	405810	420530	61025	68598	69713	37828	0	29371	228650	237550	237640	0	61116	63845	33064	0	31997	2.38266	2.41036	2.47321	0.380064	0.423647	0.420724	0.233897		0.183683	1.5081	1.61241	1.62535		0.378354	0.396614	0.216251		0.214638
LmxM.21.1770	23	K	8.66502	1.28968e-08	Up	ATP synthase F1 subunit gamma protein, putative OS=Leishmania_mexicana_MHOM/GT/2001/U1103 GN=LmxM.21.1770	LmxM.21.1770	1	0.00221368	72.038	2	FYSIVK(1)TIK	-1.4059	587180	556390	552500	0	59728	56741	63867	68308	64872	233110	252440	250300	0	0	52360	30213	0	38715	2.71945	2.56769	2.52465		0.2866	0.266063	0.306826	0.327846	0.315219	1.1946	1.33133	1.33013			0.252723	0.153533		0.201781
LmxM.21.1770	115	K	5.69039	0.000153675	Up	ATP synthase F1 subunit gamma protein, putative OS=Leishmania_mexicana_MHOM/GT/2001/U1103 GN=LmxM.21.1770	LmxM.21.1770	1	9.12735e-16	145.08	2	GIDSLSK(1)LYPSSFR	0.00019279	120550	110150	127420	0	21467	19230	0	0	0	77174	77688	75484	21294	23129	0	0	15048	16240	1.94628	1.77205	2.02971		0.359084	0.314337				1.37868	1.42826	1.39834	0.358991	0.387822			0.261928	0.295064
LmxM.21.1770	263	K	7.82545	4.81515e-09	Up	ATP synthase F1 subunit gamma protein, putative OS=Leishmania_mexicana_MHOM/GT/2001/U1103 GN=LmxM.21.1770	LmxM.21.1770	1	3.83569e-07	131.22	2	TSSLYNK(1)TR	-0.26907	1315800	1331000	1356800	172360	172960	172540	0	150250	150730	723900	738590	745570	173190	170960	165460	116350	109720	115490	2.69147	2.71288	2.73825	0.368365	0.366549	0.357327		0.318494	0.323477	1.63844	1.72036	1.74988	0.369922	0.363188	0.352718	0.261133	0.241964	0.265849
LmxM.21.1780	2	K	6.96006	0.000666655	Up	40S ribosomal protein S6, putative OS=Leishmania_mexicana_MHOM/GT/2001/U1103 GN=LmxM.21.1780	LmxM.21.1780	1	2.79727e-08	178.87	2	MK(1)LNIAYPR	0.8673	443350	417470	420050	110860	116080	116500	20759	17713	17704	533580	530830	522880	50773	45252	47549	0	0	0	1.8585	1.68599	1.76141	0.390723	0.392393	0.410261	0.122194	0.105294	0.103806	1.83004	1.87038	1.8652	0.235888	0.21186	0.230511
LmxM.21.1780	79	K	12.7141	4.1707e-05	Up	40S ribosomal protein S6, putative OS=Leishmania_mexicana_MHOM/GT/2001/U1103 GN=LmxM.21.1780	LmxM.21.1780	1	0.00399792	88.35	2	VSLLVK(1)R	-1.8989	392400	365820	348310	43372	47292	40614	11578	0	13108	262080	247150	252030	21629	21225	23001	16124	20249	18569	2.96547	2.66344	2.63313	0.275582	0.288203	0.257844	0.122864		0.138559	1.62047	1.56994	1.62078	0.181158	0.179146	0.201023	0.175162	0.21801	0.193973
LmxM.21.1830	5	K	8.71774	7.28528e-07	Up	proteasome subunit alpha type-5, putative OS=Leishmania_mexicana_MHOM/GT/2001/U1103 GN=LmxM.21.1830	LmxM.21.1830	1	1.69692e-08	109.88	2	MFTSK(1)SEYDR	-0.21732	253190	268170	268090	0	31058	33347	30193	30707	24075	165680	155290	155800	35700	32617	36773	0	0	24192	2.49089	2.7812	2.66976		0.331817	0.3606	0.293726	0.301201	0.230988	1.6119	1.53559	1.57506	0.332323	0.305526	0.344056			0.2075
LmxM.22.0060	218	K	1.76621	5.74447e-05	Up	transcription factor-like protein OS=Leishmania_mexicana_MHOM/GT/2001/U1103 GN=LmxM.22.0060	LmxM.22.0060	1	3.39109e-49	158.59	2	EASFSCGSVCGK(1)SLR	-0.40364	88315	96319	93634	58607	62598	61265	52340	45106	51012	60722	65591	61629	35434	30658	31018	0	12209	0	1.56004	1.76791	1.72583	0.967669	1.06633	1.03747	0.932593	0.798118	0.920559	1.11772	1.23585	1.15524	0.638522	0.55927	0.569754		0.197406
LmxM.22.0110	570	K	5.49286	6.27668e-07	Up	GMP synthase [glutamine-hydrolysing] OS=Leishmania_mexicana_MHOM/GT/2001/U1103 GN=LmxM.22.0110	LmxM.22.0110	1	5.5986e-81	211.84	2	VNSILLK(1)HQLVR	0.66307	259450	204000	0	38590	47203	45879	37442	36025	37099	149180	139510	141110	42562	0	50570	40923	0	46965	2.90533	2.31146		0.420093	0.521589	0.503504	0.471374	0.455095	0.477567	1.67135	1.5543	1.60209	0.505476		0.610362	0.429811		0.481168
LmxM.22.0180	87	K	13.1358	7.07286e-07	Up	hypothetical protein, conserved OS=Leishmania_mexicana_MHOM/GT/2001/U1103 GN=LmxM.22.0180	LmxM.22.0180	1	3.87971e-05	123.5	3	FASEHK(1)AQLQEVVK(1)K	-1.27	572560	537720	498090	33482	0	27788	0	37125	39343	203880	209250	210900	32958	0	0	0	39245	41423	2.87757	2.72621	2.46202	0.245571		0.193258		0.18553	0.194349	1.44546	1.45742	1.46455	0.186685				0.137121	0.145353
LmxM.22.0300	194	K	5.69456	1.43106e-06	Up	hypothetical protein, conserved OS=Leishmania_mexicana_MHOM/GT/2001/U1103 GN=LmxM.22.0300	LmxM.22.0300	1	1.2831e-68	206.7	2	QAASK(1)SLDSLTSSAFR	-2.0835	340240	305990	292600	0	60532	54409	57965	49179	0	279620	243480	232660	45794	72172	56834	42586	37160	48191	2.52934	2.2521	2.13221		0.427034	0.379713	0.440871	0.371156		1.81568	1.62004	1.51131	0.334425	0.513752	0.407636	0.332795	0.277243	0.357685
LmxM.22.0470	252	K	9.79849	1.16202e-07	Up	Putative tRNA binding domain containing protein, putative OS=Leishmania_mexicana_MHOM/GT/2001/U1103 GN=LmxM.22.0470	LmxM.22.0470	1	7.27987e-75	163.93	2	ASK(1)TELDSTSLYVR	0.83155	450160	428880	410020	57708	61486	49117	50280	0	49916	273280	272250	272410	59104	58332	56600	27983	31887	37095	3.31459	2.99282	3.04234	0.307043	0.340618	0.25634	0.351728		0.334609	1.76424	1.62027	1.63755	0.404986	0.407953	0.400159	0.17623	0.203596	0.240639
LmxM.22.0570	228	K	17.6242	1.02234e-05	Up	proteasome regulatory ATPase subunit 1, putative OS=Leishmania_mexicana_MHOM/GT/2001/U1103 GN=LmxM.22.0570	LmxM.22.0570	1	1.73273e-16	132.9	2	GVLLYGPPGTGK(1)TLLAK	-0.083049	1353200	1301600	1293500	90188	74501	61683	0	0	51916	1034300	1081400	1032000	151730	138230	161450	0	43145	0	2.35643	2.19372	2.23726	0.16751	0.14055	0.117022			0.0884101	1.74755	1.93608	1.85556	0.2774	0.24551	0.285471		0.0798989
LmxM.22.0620	74	K	8.064	0.000869181	Up	proteasome regulatory ATPase subunit 5, putative OS=Leishmania_mexicana_MHOM/GT/2001/U1103 GN=LmxM.22.0620	LmxM.22.0620	1	0.000196794	141.29	2	SK(1)QELISLK(1)R	-2.6308	315950	256960	287790	37915	0	0	30844	0	0	185730	180600	182230	0	31079	0	0	0	24298	2.10806	1.71101	1.95362	0.280896			0.196344			1.13077	1.13895	1.15083		0.222541				0.133079
LmxM.22.0730	388	K	2.45806	0.000253128	Up	cytoskeleton associated protein, putative OS=Leishmania_mexicana_MHOM/GT/2001/U1103 GN=LmxM.22.0730	LmxM.22.0730	1	7.10777e-88	185.9	2	ESLLK(1)EEEELK	2.201	179400	141540	0	48738	48269	41969	51341	45788	57771	125600	145320	118350	56614	56356	60196	50425	44866	54087	1.97239	1.55316		0.822302	0.828181	0.700502	0.652001	0.578711	0.721139	1.76398	2.03326	1.67257	0.690234	0.686584	0.735609	0.595424	0.524284	0.629061
LmxM.22.0770	215	K	5.41649	5.88681e-05	Up	NADH-cytochrome b5 reductase, putative OS=Leishmania_mexicana_MHOM/GT/2001/U1103 GN=LmxM.22.0770	LmxM.22.0770	1	2.19749e-27	142.71	2	FIAYHCLTTPPK(1)R	2.9863	233170	237380	223330	64222	38329	60877	58805	56281	28080	149410	143550	149660	54070	0	51084	41269	39862	41696	2.98254	2.78742	2.68711	0.676386	0.400455	0.632082	0.578337	0.556027	0.279423	1.94553	1.87476	1.94186	0.572235		0.547216	0.289821	0.28998	0.295136
LmxM.22.0770	63	K	7.96777	4.79004e-10	Up	NADH-cytochrome b5 reductase, putative OS=Leishmania_mexicana_MHOM/GT/2001/U1103 GN=LmxM.22.0770	LmxM.22.0770	1	0.000392807	114.64	2	FALPSSK(1)TR	0.29449	1163200	1172800	1160900	185520	185240	181780	162920	166000	168700	643400	642800	659500	173070	0	172180	0	0	165200	3.13263	2.89951	2.94086	0.41138	0.407476	0.397381	0.337351	0.34529	0.353445	1.76393	1.7675	1.80164	0.385639		0.388327			0.246195
LmxM.22.0770	53	K	14.8877	1.15065e-10	Up	NADH-cytochrome b5 reductase, putative OS=Leishmania_mexicana_MHOM/GT/2001/U1103 GN=LmxM.22.0770	LmxM.22.0770	1	1.32311e-44	174.23	2	LIHVENESHNTK(1)R	-2.1186	336200	348870	370710	29617	29648	30256	25643	26727	27653	221540	224680	218870	29515	31273	29323	33390	31384	32088	3.6628	3.48919	3.79905	0.265677	0.26383	0.267568	0.214802	0.224899	0.234374	2.45705	2.49925	2.41881	0.26605	0.285975	0.267537	0.199721	0.194455	0.193452
LmxM.22.0770	130	K	4.63194	6.34131e-08	Up	NADH-cytochrome b5 reductase, putative OS=Leishmania_mexicana_MHOM/GT/2001/U1103 GN=LmxM.22.0770	LmxM.22.0770	0.999998	1.30865e-41	118.91	3	VGDSIDVK(1)GPWHTFDVKPGQYTR	-0.1881	443560	430970	423590	104530	92250	104020	121210	124540	127460	307140	316020	308120	0	97024	98719	73532	76790	80473	2.84724	2.5396	2.55766	0.552472	0.483672	0.541995	0.598224	0.61745	0.6365	2.00703	2.07117	2.00628		0.52275	0.53068	0.259144	0.280332	0.285849
LmxM.22.1120	340	K	8.48915	6.09463e-08	Up	Beta-lactamase superfamily domain containing protein, putative OS=Leishmania_mexicana_MHOM/GT/2001/U1103 GN=LmxM.22.1120	LmxM.22.1120	1	8.48993e-55	172.92	2	GTAFK(1)SQQAPQQGPQQR	-2.1762	172740	141660	138620	17149	11946	13187	18180	16382	18713	74025	76246	79715	21273	18451	0	14738	14004	17710	3.56799	2.71642	2.94286	0.439885	0.302691	0.363926	0.357686	0.338864	0.370846	1.69962	1.95055	1.8791	0.346423	0.287327		0.220968	0.236023	0.279312
LmxM.22.1410	94	K	10.8543	4.5735e-11	Up	centrin-4, putative OS=Leishmania_mexicana_MHOM/GT/2001/U1103 GN=LmxM.22.1410	LmxM.22.1410	1	1.2317e-05	121.8	2	AFQLFDLDK(1)K	-0.061511	811890	853710	917660	70896	67331	68332	68977	62110	62281	656790	689740	673680	59470	59963	64526	69810	68388	65685	2.48856	2.73764	2.75936	0.244284	0.244	0.255715	0.257262	0.225135	0.245016	2.05482	2.37743	2.1106	0.230242	0.228454	0.230164	0.193452	0.194361	0.189718
LmxM.22.1410	97	K	18.0134	4.6919e-06	Up	centrin-4, putative OS=Leishmania_mexicana_MHOM/GT/2001/U1103 GN=LmxM.22.1410	LmxM.22.1410	1	0.000367107	130.31	2	GK(1)ISFANLK(1)EVAK	-1.01	463050	398280	405640	0	20681	21363	0	17247	0	272070	261570	266620	17692	0	0	15417	17039	0	2.3436	2.10892	2.01406		0.123752	0.132008		0.103228		1.4055	1.48873	1.37927	0.113102			0.0705439	0.0799609
LmxM.22.1460	161	K	4.58567	0.000413408	Up	i/6 autoantigen-like protein OS=Leishmania_mexicana_MHOM/GT/2001/U1103 GN=LmxM.22.1460	LmxM.22.1460	1	3.42934e-10	151.22	2	K(1)LDALEAK(1)R	-0.42887	350140	403670	314790	0	61563	0	0	72496	0	245190	0	209890	0	0	0	62716	0	62352	1.65794	1.94666	1.55028		0.373386			0.376033		1.37282		1.13365				0.248618		0.242088
LmxM.22.1520	54	K	14.5065	3.26229e-08	Up	40S ribosomal protein L14, putative OS=Leishmania_mexicana_MHOM/GT/2001/U1103 GN=LmxM.22.1520	LmxM.22.1520	1	8.57321e-55	176.45	3	HVQNLK(1)NVEPLK(1)YCVSISR	0.3277	9534600	9035600	9009000	775610	765070	763580	503800	514990	519810	5937900	6072900	6146400	644630	645370	648320	362440	377510	398470	3.40607	2.87638	2.8602	0.261621	0.230444	0.226191	0.176475	0.183822	0.181938	1.86539	1.894	1.90408	0.229603	0.208392	0.212188	0.16777	0.167827	0.165717
LmxM.22.1520	3	K	9.93027	5.06808e-06	Up	40S ribosomal protein L14, putative OS=Leishmania_mexicana_MHOM/GT/2001/U1103 GN=LmxM.22.1520	LmxM.22.1520	1	3.1847e-27	187.23	2	VK(1)SHYICAGR	1.6329	4601200	4631600	4815200	608310	0	615630	305180	399820	407840	3308700	3343300	0	486120	482080	488020	185890	0	179970	2.9014	2.60259	2.69849	0.362192		0.321903	0.188698	0.251912	0.251973	1.83476	1.84053		0.30563	0.274775	0.281939	0.151887		0.132117
LmxM.22.1520	141	K	6.53172	8.13585e-06	Up	40S ribosomal protein L14, putative OS=Leishmania_mexicana_MHOM/GT/2001/U1103 GN=LmxM.22.1520	LmxM.22.1520	1	5.94471e-08	123.42	2	TPVSWHK(1)VALK	1.0115	1455100	1389500	1400400	228350	231420	231720	0	0	0	1018000	1037400	1042700	172510	0	148770	0	0	42809	2.17265	1.84882	1.85831	0.321941	0.291348	0.286899				1.33669	1.35231	1.35011	0.256819		0.203513			0.0744137
LmxM.22.1540	913	K	7.08291	0.00254852	Up	alanyl-tRNA synthetase, putative OS=Leishmania_mexicana_MHOM/GT/2001/U1103 GN=LmxM.22.1540	LmxM.22.1540	1	6.01884e-11	95.138	2	ALAIVSMPAAFVEK(1)K	-1.2494	192070	280550	170020	0	29273	31545	0	0	0	124260	98631	110600	0	21198	26701	19791	24891	26672	2.17291	3.18694	1.87601		0.328773	0.35229				1.35165	1.04763	1.20851		0.248524	0.316557	0.215253	0.268715	0.298117
LmxM.22.1540	811	K	7.35392	1.00198e-05	Up	alanyl-tRNA synthetase, putative OS=Leishmania_mexicana_MHOM/GT/2001/U1103 GN=LmxM.22.1540	LmxM.22.1540	1	1.40141e-10	97.594	2	VGDSCIPLVLK(1)NEMR	0.82505	265730	265660	280710	32421	40971	37606	0	0	0	225070	235270	234390	36043	35297	30633	0	0	28287	1.98835	1.996	2.04863	0.238247	0.304352	0.277778				1.61927	1.65285	1.69397	0.281333	0.273705	0.240206			0.209117
LmxM.22.1540	830	K	2.76367	1.79588e-06	Up	alanyl-tRNA synthetase, putative OS=Leishmania_mexicana_MHOM/GT/2001/U1103 GN=LmxM.22.1540	LmxM.22.1540	1	1.48565e-11	119.55	2	MNAILK(1)SQAAEAR	2.3354	131150	139500	136400	47082	53523	47682	0	47845	0	113520	117970	118470	43937	40476	0	27472	29169	29624	1.76131	1.88115	1.78663	0.620968	0.713599	0.632134		0.652564		1.46585	1.48748	1.5367	0.615523	0.563322		0.354696	0.373815	0.393061
LmxM.22.1540	463	K	6.8888	2.85524e-07	Up	alanyl-tRNA synthetase, putative OS=Leishmania_mexicana_MHOM/GT/2001/U1103 GN=LmxM.22.1540	LmxM.22.1540	1	6.20931e-55	159.82	2	VAATK(1)TFIDAYQLEELK	0.99692	459270	430130	423820	65519	69244	63238	55820	0	0	293630	276630	282480	73165	86172	74811	45891	44452	0	2.52583	2.3753	2.27338	0.353876	0.378064	0.343323	0.313369			1.5527	1.4284	1.50051	0.419746	0.491128	0.431166	0.24264	0.23329
LmxM.23.0040	137	K	6.88735	2.53729e-07	Up	tryparedoxin peroxidase OS=Leishmania_mexicana_MHOM/GT/2001/U1103 GN=LmxM.23.0040	LmxM.23.0040	1	4.41129e-17	113.48	3	GGLGEMHIPVLADK(1)SMEIAR	-1.7747	336170	301290	304200	40012	40590	45410	56274	62863	47960	167800	239060	211190	47672	47440	44168	67859	56317	58066	3.28709	2.71913	2.72867	0.354511	0.372217	0.394083	0.464405	0.536932	0.414352	1.69713	2.46991	2.06115	0.458159	0.451792	0.41961	0.369166	0.313351	0.317892
LmxM.23.0040	97	K	2.91688	0.00189375	Up	tryparedoxin peroxidase OS=Leishmania_mexicana_MHOM/GT/2001/U1103 GN=LmxM.23.0040	LmxM.23.0040	1	6.72108e-05	138.55	2	HAEFEK(1)R	0.036698	732330	474890	623820	153840	191650	146890	205100	354110	297800	269340	373580	442350	293510	149920	133610	152900	370920	214720	2.78967	1.66967	2.17994	0.53101	0.684668	0.496618	0.659399	1.1783	1.00233	1.06125	1.50367	1.68189	1.09893	0.556221	0.494505	0.324053	0.804018	0.457956
LmxM.23.0080	222	K	9.40571	2.93025e-08	Up	hypothetical protein, conserved OS=Leishmania_mexicana_MHOM/GT/2001/U1103 GN=LmxM.23.0080	LmxM.23.0080	1	1.68532e-50	183.13	2	ELMEEVK(1)SNER	-6.2453	325260	308800	325940	0	26100	28300	29416	32183	38383	184390	174840	170530	0	0	0	0	0	14575	2.21586	1.9016	2.01404		0.217273	0.223057	0.193454	0.207362	0.24534	1.57324	1.49222	1.42193						0.107925
LmxM.23.0200	69	K	15.4436	1.58018e-07	Up	endoribonuclease L-PSP (pb5), putative OS=Leishmania_mexicana_MHOM/GT/2001/U1103 GN=LmxM.23.0200	LmxM.23.0200	1	1.15042e-127	264.84	3	VAAK(1)SCAVQLIAQIK(1)AAAGGDLDK	13.97	10803000	10523000	10101000	873700	875070	837660	532150	526370	555790	8114800	9476100	9046600	656860	645980	602530	1012600	1026200	1077100	3.33346	2.84368	2.85944	0.247638	0.237205	0.241543	0.150894	0.141095	0.151894	2.41239	2.78327	2.66184	0.189315	0.181121	0.173294	0.233593	0.20159	0.210965
LmxM.23.0260	111	K	9.18177	6.02396e-07	Up	argininosuccinate synthase, putative OS=Leishmania_mexicana_MHOM/GT/2001/U1103 GN=LmxM.23.0260	LmxM.23.0260	1	2.76499e-17	136.06	3	PLIAK(1)HLVEVAHK	0.74485	759630	635760	619970	44149	42273	41864	49752	47424	51382	278720	261200	284000	77306	68110	74034	35268	45940	50940	3.35844	2.6851	2.66889	0.380918	0.376061	0.363171	0.263772	0.244611	0.269235	1.5842	1.49268	1.65567	0.365687	0.32334	0.352748	0.149237	0.198682	0.218045
LmxM.23.0360	351	K	6.23487	5.56872e-05	Up	NADP-dependent alcohol dehydrogenase, putative OS=Leishmania_mexicana_MHOM/GT/2001/U1103 GN=LmxM.23.0360	LmxM.23.0360	1	4.99975e-16	159.93	2	FVIDMASLQK(1)E	5.5953	100900	218400	154000	23818	0	19530	19725	24836	23856	87917	108310	138900	24657	29126	22440	20184	17927	18377	1.7995	3.86714	2.66093	0.51138		0.448573	0.36226	0.454939	0.44892	1.54519	1.99025	2.61154	0.364588	0.450843	0.353668	0.209592	0.184733	0.195949
LmxM.23.0360	176	K	3.70068	1.20111e-11	Up	NADP-dependent alcohol dehydrogenase, putative OS=Leishmania_mexicana_MHOM/GT/2001/U1103 GN=LmxM.23.0360	LmxM.23.0360	1	0.000532682	122.44	2	YWGVTK(1)GTR	0.087583	2058800	2137500	2115100	445360	448970	443980	541120	553850	541300	1501300	1534000	1546400	589580	577690	573300	502250	514920	535690	2.38529	2.45872	2.37416	0.621178	0.650969	0.662462	0.6456	0.659068	0.661722	1.71413	1.83118	1.88879	0.566333	0.580907	0.586977	0.338809	0.344702	0.371064
LmxM.23.0370	70	K	34.8428	4.05664e-10	Up	cytochrome c oxidase subunit 10, putative OS=Leishmania_mexicana_MHOM/GT/2001/U1103 GN=LmxM.23.0370	LmxM.23.0370	1	1.03208e-11	172.1	2	IK(1)NNPSIGDFR	0.73074	2931400	2949600	3034400	138230	139520	138200	141980	141260	141550	1663800	1700600	1763700	94075	92257	95186	124340	122020	125480	5.33493	4.82506	4.75187	0.165555	0.164152	0.156822	0.126227	0.119663	0.12353	2.29188	2.17918	2.27428	0.135829	0.130687	0.140256	0.113923	0.106046	0.112051
LmxM.23.0710	79	K	6.59271	1.12436e-05	Up	acetyl-CoA synthetase, putative OS=Leishmania_mexicana_MHOM/GT/2001/U1103 GN=LmxM.23.0710	LmxM.23.0710	1	7.089e-10	97.175	3	RDFYWK(1)TTWADDQR	-0.95522	80766	89309	80382	13920	0	13161	0	10566	14209	57658	57129	58814	16994	18540	0	0	0	0	1.92756	2.12906	1.9654	0.351483		0.317624		0.232776	0.316031	1.16851	1.1363	1.16964	0.386239	0.423973
LmxM.23.0710	529	K	4.97055	3.25145e-05	Up	acetyl-CoA synthetase, putative OS=Leishmania_mexicana_MHOM/GT/2001/U1103 GN=LmxM.23.0710	LmxM.23.0710	1	4.13206e-37	111.75	2	FEK(1)TYFNVDGYYMTGDGAR	1.0579	166870	167000	139060	22943	31657	0	0	39204	36200	0	31562	0	65019	49835	47285	13430	18586	0	2.66287	2.66196	2.27345	0.387353	0.535011			0.577497	0.538352		0.419751		0.988082	0.762001	0.719291	0.255768	0.357387
LmxM.23.0710	167	K	4.87388	0.000382532	Up	acetyl-CoA synthetase, putative OS=Leishmania_mexicana_MHOM/GT/2001/U1103 GN=LmxM.23.0710	LmxM.23.0710	1	5.01154e-06	104.39	2	HQYGITK(1)GDR	2.1225	558830	0	586290	0	0	131670	114790	127380	0	344390	374840	390160	140370	0	0	80231	78115	78319	2.26966		2.43952			0.54077	0.430979	0.477562		1.18775	1.26877	1.32044	0.542921			0.388886	0.382293	0.384371
LmxM.23.0710	89	K	4.22777	0.000413832	Up	acetyl-CoA synthetase, putative OS=Leishmania_mexicana_MHOM/GT/2001/U1103 GN=LmxM.23.0710	LmxM.23.0710	1	0.00472138	85.716	2	VK(1)SYNFDK	2.5198	368970	332330	0	0	79437	77827	0	110300	71825	222600	224660	226490	0	0	60220	33468	0	34269	2.44449	2.19928			0.557369	0.521402		0.674561	0.443465	1.25232	1.24045	1.25038			0.38032	0.264623		0.274348
LmxM.23.0710	160	K	7.61369	9.0009e-09	Up	acetyl-CoA synthetase, putative OS=Leishmania_mexicana_MHOM/GT/2001/U1103 GN=LmxM.23.0710	LmxM.23.0710	1	4.31733e-80	166.65	2	VVELANVLK(1)HQYGITK	0.18345	2238900	2301400	2093400	305240	311930	316190	284590	275950	283840	1146200	1426100	1252600	328130	284200	345660	147780	162030	215610	2.98786	3.06783	2.86213	0.430976	0.440864	0.426696	0.351089	0.339942	0.353009	1.29891	1.58611	1.39294	0.417016	0.363412	0.439729	0.235365	0.260557	0.347694
LmxM.23.0560	55	K	5.16411	5.41165e-06	Up	kinesin-C OS=Leishmania_mexicana_MHOM/GT/2001/U1103 GN=LmxM.23.0560	LmxM.23.0560	1	1.26621e-29	183.57	2	IVHTFQDTK(1)HK	1.5773	332690	335050	360600	60312	60834	0	48985	49307	54553	226020	216050	242610	81038	76169	77167	39048	40195	0	2.13133	2.11212	2.26751	0.507344	0.496885		0.344139	0.356705	0.396277	1.44997	1.42323	1.58091	0.551663	0.51435	0.512886	0.279089	0.285131
LmxM.23.0560	259	K	5.57333	0.0153504	Up	kinesin-C OS=Leishmania_mexicana_MHOM/GT/2001/U1103 GN=LmxM.23.0560	LmxM.23.0560	1	0.000333671	66.664	2	YALPAFK(1)TQAGR	-5.3723	571260	575120	562730	0	99364	111980	0	29497	0	0	0	414840	0	145850	140380	0	94127	0	1.91692	1.89901	1.85347		0.425108	0.480357		0.111774				1.41592		0.515879	0.488715		0.349742
LmxM.23.0690	188	K	2.34848	0.000226554	Up	3-ketoacyl-CoA thiolase-like protein OS=Leishmania_mexicana_MHOM/GT/2001/U1103 GN=LmxM.23.0690	LmxM.23.0690	1	2.90859e-26	147.02	2	LDDFTFPCLFAK(1)R	0.54393	326140	339000	409840	113670	115990	122830	197320	199920	195160	249770	400570	323420	161090	194100	160940	141310	160630	166210	1.69144	1.75972	2.1056	0.580893	0.605699	0.625078	0.957766	0.991562	0.971225	1.2354	2.01404	1.60924	0.752666	0.915401	0.757787	0.431111	0.505099	0.520624
LmxM.23.0760	155	K	21.7976	8.79262e-08	Up	mitochondrial RNA binding protein, putative OS=Leishmania_mexicana_MHOM/GT/2001/U1103 GN=LmxM.23.0760	LmxM.23.0760	1	1.51105e-38	216.26	2	SSILLTK(1)SQIK	0.74266	3012600	2663800	2698300	126010	133830	0	0	146880	152870	1494800	1466700	1510600	240820	231720	236490	189240	186720	213390	3.52505	3.09231	3.09322	0.132546	0.141457			0.158759	0.161222	1.6026	1.54897	1.56716	0.26704	0.257988	0.26325	0.208351	0.206267	0.230765
LmxM.23.0950	22	K	4.10248	2.27862e-05	Up	metallo-peptidase, Clan MF, Family M17 OS=Leishmania_mexicana_MHOM/GT/2001/U1103 GN=LmxM.23.0950	LmxM.23.0950	1	5.93921e-06	68.108	2	SLSVGPATK(1)LTANR	-1.3503	153080	135190	137070	0	34213	0	0	0	37266	83741	88027	87459	0	0	0	0	0	0	1.53298	1.45075	1.44556		0.350929				0.368844	0.858721	0.937035	0.915021
LmxM.23.1000	228	K	4.29075	0.000229331	Up	hypothetical protein, unknown function OS=Leishmania_mexicana_MHOM/GT/2001/U1103 GN=LmxM.23.1000	LmxM.23.1000	1	3.96143e-05	63.397	2	YYSHLSK(1)TMQA	4.514	0	233210	235410	0	0	63035	60685	0	0	178400	187280	0	77561	80987	0	0	0	0		1.88418	1.83349			0.426464	0.439973			1.4164	1.5358		0.629226	0.65594
LmxM.23.1165	233	K	2.7101	0.000815631	Up	coronin, putative OS=Leishmania_mexicana_MHOM/GT/2001/U1103 GN=LmxM.23.1165	LmxM.23.1165	1	2.89622e-16	101.64	2	DTIMTLGCSK(1)SQQR	-0.49945	87196	83547	93227	43025	39545	0	24210	22815	23341	65162	69821	57366	32695	31204	38429	0	11421	0	1.69805	1.67753	1.92085	0.884867	0.814675		0.542196	0.50483	0.510645	1.35678	1.45716	1.21966	0.64109	0.62172	0.791765		0.243065
LmxM.23.1220	354	K	7.47885	0.0457817	Up	T-complex protein 1, gamma subunit, putative OS=Leishmania_mexicana_MHOM/GT/2001/U1103 GN=LmxM.23.1220	LmxM.23.1220	1	0.0071984	69.905	2	AGLFEIK(1)K	-0.53293	0	319630	324160	0	0	46307	0	32085	0	192780	202210	186740	0	0	0	0	0	26877		1.81006	1.83921			0.279723		0.20822		1.00531	1.06786	1.00894						0.18623
LmxM.23.1480	42	K	2.77962	0.000482544	Up	alanine racemase, putative OS=Leishmania_mexicana_MHOM/GT/2001/U1103 GN=LmxM.23.1480	LmxM.23.1480	1	0.000160927	121.96	2	VTLIAVGK(1)TK	0.67064	406350	363890	384230	131110	133050	125230	120630	62406	122060	288460	347810	349310	199010	185880	191160	61940	75162	90033	1.88071	1.71838	1.79407	0.739242	0.744097	0.692969	0.671627	0.352599	0.679974	1.3952	1.6862	1.68879	1.09034	1.0325	1.05453	0.242314	0.302498	0.353112
LmxM.23.1580	55	K	7.41438	5.90534e-06	Up	Nucleoside 2-deoxyribosyltransferase, putative OS=Leishmania_mexicana_MHOM/GT/2001/U1103 GN=LmxM.23.1580	LmxM.23.1580	1	0.00110745	125.5	2	NK(1)NIDMIR	1.2281	0	347360	345900	41147	45115	0	52117	55252	47950	254900	273200	264920	0	0	30949	32824	0	36095		2.67591	2.77228	0.303027	0.341076		0.408046	0.421242	0.363643	2.05842	2.28307	2.17153			0.242543	0.164713		0.176611
LmxM.24.0010	148	K	1.72797	0.00867274	Up	pyruvate dehydrogenase (lipoamide) kinase, putative OS=Leishmania_mexicana_MHOM/GT/2001/U1103 GN=LmxM.24.0010	LmxM.24.0010	1	8.73199e-12	132.44	2	K(1)WYQWSFHDVR	1.636	20737	21314	24975	0	0	0	14950	12200	10870	14151	16696	13713	13847	14624	14853	0	0	0	1.17121	1.17725	1.30422				0.846212	0.691359	0.576286	0.782644	1.028	0.7643	0.825672	0.843399	0.899342
LmxM.24.0030	67	K	24.8715	8.2898e-08	Up	hypothetical protein, conserved OS=Leishmania_mexicana_MHOM/GT/2001/U1103 GN=LmxM.24.0030	LmxM.24.0030	1	0.000189213	109.88	2	IK(1)TFVPISR	-0.70576	801170	809770	811440	31675	0	32008	0	30116	0	500000	507020	518910	39644	42279	38928	21343	27371	27483	2.94816	2.9987	2.79576	0.112055		0.123248		0.116209		1.69939	1.75567	1.77404	0.14378	0.152726	0.139981	0.0667867	0.0859598	0.0858124
LmxM.24.0040	161	K	19.3283	2.02804e-06	Up	60S ribosomal protein L17, putative OS=Leishmania_mexicana_MHOM/GT/2001/U1103 GN=LmxM.24.0040	LmxM.24.0040	1	0.00233439	85.716	2	VPAPK(1)SAPK	-1.2015	1148300	1076600	1095400	173130	161750	171430	0	86364	84657	704350	713200	713360	116040	110630	0	0	92463	87024	4.04711	4.17869	3.97708	0.206165	0.180812	0.166465		0.250924	0.247884	1.54959	1.51592	1.57161	0.307155	0.25711			0.450546	0.365975
LmxM.24.0040	115	K	8.16706	0.0463863	Up	60S ribosomal protein L17, putative OS=Leishmania_mexicana_MHOM/GT/2001/U1103 GN=LmxM.24.0040	LmxM.24.0040	1	2.09634e-16	144.72	2	GLDPNQMVIK(1)HVQVDQAAR	-4.3255	263210	223570	238370	106270	0	93361	0	0	0	243660	265410	252030	0	0	0	0	0	0	1.91774	1.79389	1.78912	0.261607		0.187412				1.10818	1.16622	1.14785
LmxM.24.0040	96	K	2.67606	0.000129678	Up	60S ribosomal protein L17, putative OS=Leishmania_mexicana_MHOM/GT/2001/U1103 GN=LmxM.24.0040	LmxM.24.0040	1	2.28104e-103	208.81	2	SVVAMMSLLK(1)NAEANAIEK	-0.38514	75604	107260	118620	127350	120710	109940	49495	50843	50026	104020	205860	145320	40732	49998	27791	13783	13450	0	1.39879	2.18545	2.26082	0.796082	0.708341	0.560412	0.759157	0.775457	0.76895	1.20133	2.29696	1.68066	0.565983	0.60998	0.333469	0.437928	0.344042
LmxM.24.0080	330	K	2.03057	0.000502901	Up	Ring finger domain containing protein, putative OS=Leishmania_mexicana_MHOM/GT/2001/U1103 GN=LmxM.24.0080	LmxM.24.0080	1	2.46571e-06	95.311	2	AVCPGGCK(1)HLVR	0.62578	233150	166170	170660	102840	96730	97173	80756	80126	0	126820	130450	124350	0	0	96185	48718	46154	46121	2.06019	1.55314	1.58429	0.99939	0.910638	0.881067	0.732982	0.742079		1.12055	1.17728	1.19822			0.876189	0.441103	0.39711	0.397698
LmxM.24.0130	36	K	2.4181	1.7158e-05	Up	WD40/YVTN repeat-like-containing protein OS=Leishmania_mexicana_MHOM/GT/2001/U1103 GN=LmxM.24.0130	LmxM.24.0130	1	1.60598e-09	104.39	2	FK(1)TDTSFLAQR	0.86193	227710	218170	206400	0	0	89757	79563	72097	89238	152490	152490	165170	79133	77624	72060	0	0	52934	1.69003	1.62915	1.51287			0.677474	0.65382	0.601691	0.731397	1.21308	1.23695	1.32006	0.657696	0.647632	0.604715			0.482029
LmxM.24.0140	286	K	4.24612	0.000155988	Up	ankyrin/TPR repeat protein OS=Leishmania_mexicana_MHOM/GT/2001/U1103 GN=LmxM.24.0140	LmxM.24.0140	1	2.62024e-16	156.14	2	NQGNK(1)VFQQGENVK	-1.7768	71405	67860	70365	16496	15509	0	0	0	0	50191	49466	50647	14452	16612	16662	0	0	0	1.63996	1.64776	1.738	0.423596	0.365474					1.24419	1.16133	1.19189	0.382256	0.443459	0.432576
LmxM.24.0140	175	K	2.21112	0.000689521	Up	ankyrin/TPR repeat protein OS=Leishmania_mexicana_MHOM/GT/2001/U1103 GN=LmxM.24.0140	LmxM.24.0140	1	1.40404e-27	121.23	3	VPINAVDK(1)HGGTALFTAIFMK	0.18511	50602	60349	62858	29552	25372	0	23171	24066	0	12182	18576	25525	0	0	7897.5	0	0	0	1.50219	1.89409	2.0068	0.980869	0.772819		0.743028	0.761411		0.390329	0.563707	0.776423			0.265018
LmxM.24.0160	134	K	11.7026	6.83543e-07	Up	hypothetical protein, conserved OS=Leishmania_mexicana_MHOM/GT/2001/U1103 GN=LmxM.24.0160	LmxM.24.0160	1	7.80393e-15	136.06	2	TALSGK(1)DMDFVYR	0.65782	298110	290020	284320	24732	25369	28847	0	20850	20877	170820	170700	175070	0	0	39137	0	0	0	2.17321	2.08491	2.077	0.192695	0.196055	0.22301		0.146783	0.143692	1.59431	1.52031	1.52054			0.305283
LmxM.24.0320	387	K	3.63627	5.92564e-07	Up	fumarate hydratase, putative OS=Leishmania_mexicana_MHOM/GT/2001/U1103 GN=LmxM.24.0320	LmxM.24.0320	1	1.92282e-44	200.06	2	EVLQELSK(1)HPAR	-1.106	390410	328640	309850	79628	77365	82277	112760	115520	118750	210430	209350	207620	114550	111240	113190	49190	53801	61067	2.61241	2.10558	1.96262	0.564954	0.551135	0.590603	0.635962	0.648658	0.683119	1.18371	1.16543	1.15571	0.706814	0.679421	0.69705	0.477775	0.534322	0.590024
LmxM.24.0320	150	K	8.73837	0.00240426	Up	fumarate hydratase, putative OS=Leishmania_mexicana_MHOM/GT/2001/U1103 GN=LmxM.24.0320	LmxM.24.0320	1	0.000611617	106.93	2	GVYDIFQK(1)R	0.53203	386390	370920	364750	0	57100	51526	28966	30211	0	259260	264780	262460	74862	76361	77587	29008	0	30541	2.50166	2.29939	2.23543		0.393578	0.35787	0.158069	0.164137		1.41109	1.4262	1.4136	0.446944	0.451265	0.462303	0.272613		0.285515
LmxM.24.0320	215	K	3.01934	0.000680769	Up	fumarate hydratase, putative OS=Leishmania_mexicana_MHOM/GT/2001/U1103 GN=LmxM.24.0320	LmxM.24.0320	1	0.00118565	88.181	2	SVLNPK(1)SLR	0.40604	494520	485710	468040	98173	0	0	200010	208840	199460	349750	346460	348920	227310	221500	222290	0	0	0	1.69511	1.59412	1.51866	0.356806			0.577857	0.60071	0.587775	1.00783	0.988003	0.994945	0.718491	0.693018	0.701243
LmxM.24.0370	280	K	2.38533	0.0193519	Up	aspartate aminotransferase, putative OS=Leishmania_mexicana_MHOM/GT/2001/U1103 GN=LmxM.24.0370	LmxM.24.0370	1	6.78164e-82	157.58	3	ALNQQEVPTYLVAQSLAK(1)SFGLYGHR	-0.063551	51299	50824	87404	13676	0	0	32925	30382	27430	0	0	11815	0	0	0	0	0	0	1.34241	1.36563	2.26665	0.387653			0.856635	0.812472	0.72395			0.303809
LmxM.24.0370	302	K	1.68884	0.0206302	Up	aspartate aminotransferase, putative OS=Leishmania_mexicana_MHOM/GT/2001/U1103 GN=LmxM.24.0370	LmxM.24.0370	1	5.14782e-75	139.7	2	EK(1)VNVLSQLQSTIR	-1.2813	45113	61880	62838	0	0	0	30026	31104	39233	43673	65865	57674	22478	34532	31516	33772	26258	22419	1.11244	1.5668	1.53559				0.736151	0.783804	0.975738	1.0665	1.58238	1.39748	0.553829	0.844532	0.760966	0.799262	0.601398	0.518167
LmxM.24.0370	342	K	2.3223	0.0344846	Up	aspartate aminotransferase, putative OS=Leishmania_mexicana_MHOM/GT/2001/U1103 GN=LmxM.24.0370	LmxM.24.0370	1	6.80968e-28	147.72	2	ELWK(1)SELNQMSSR	1.2922	254280	248290	250050	50777	71287	0	153800	146500	0	214090	228890	219190	206870	201480	197660	146610	0	142660	1.39609	1.39974	1.36052	0.301978	0.422837		0.83956	0.821968		1.16404	1.22436	1.18253	1.13486	1.09712	1.06262	0.772542		0.734145
LmxM.24.0640	271	K	4.45046	1.28886e-06	Up	Kinesin-13 3, putative OS=Leishmania_mexicana_MHOM/GT/2001/U1103 GN=LmxM.24.0640	LmxM.24.0640	1	1.7817e-13	122.51	2	ALGMGK(1)SHVPFR	0.52989	148240	161240	151460	0	0	0	49068	52493	50190	88827	93486	94774	25603	25641	27414	0	0	0	1.97175	2.16097	2.13252				0.457974	0.481823	0.467974	1.02689	1.07807	1.07428	0.350287	0.368196	0.383987
LmxM.24.0761	356	K	1.63101	0.000931285	Up	malic enzyme OS=Leishmania_mexicana_MHOM/GT/2001/U1103 GN=LmxM.24.0761	LmxM.24.0761	1	6.12667e-05	121.8	2	LAAHK(1)ALLSR	0.27753	525320	384470	390350	229580	233780	229340	220180	215830	222050	339700	350560	343890	262040	266290	271030	145970	151730	155510	1.85178	1.3458	1.40993	1.01677	1.045	1.01672	0.856606	0.843939	0.870838	1.10258	1.11879	1.0803	0.959867	0.968449	0.988913	0.493133	0.512374	0.527812
LmxM.24.0761	341	K	5.71896	2.44034e-05	Up	malic enzyme OS=Leishmania_mexicana_MHOM/GT/2001/U1103 GN=LmxM.24.0761	LmxM.24.0761	1	4.74614e-84	191.95	2	TFYLVDTK(1)GLVSDTR	3.6717	577890	523790	511070	108720	98516	81912	63227	56446	63095	475800	576380	504250	125260	113820	105580	123630	110570	118520	2.31841	2.08668	2.10089	0.547997	0.501184	0.413283	0.279954	0.251196	0.281619	1.7576	2.09352	1.80282	0.522199	0.471108	0.438433	0.475341	0.424946	0.457818
LmxM.24.0761	134	K	5.63091	2.74339e-08	Up	malic enzyme OS=Leishmania_mexicana_MHOM/GT/2001/U1103 GN=LmxM.24.0761	LmxM.24.0761	1	8.92018e-16	141.44	2	YLK(1)SHFSEVMK	2.3116	720330	712010	723390	111250	108550	114910	104850	105810	103560	396320	394390	416650	121320	113810	110640	79029	80368	87610	2.72272	2.67246	2.80171	0.528318	0.520292	0.546241	0.4374	0.443643	0.435498	1.37933	1.34965	1.40347	0.476522	0.443822	0.432873	0.286282	0.291009	0.318847
LmxM.24.0770	552	K	2.70497	4.92118e-08	Up	malic enzyme, putative OS=Leishmania_mexicana_MHOM/GT/2001/U1103 GN=LmxM.24.0770	LmxM.24.0770	1	1.03121e-12	141.29	2	MVK(1)TAFWEPR	-0.27562	514030	552840	548240	208470	217170	179400	205350	202050	205620	444270	446750	450500	318630	284350	297290	181400	185730	184440	1.69582	1.813	1.80502	0.679936	0.716963	0.591684	0.649399	0.640206	0.650752	1.26291	1.28726	1.31314	1.00736	0.909832	0.970713	0.626065	0.633204	0.626944
LmxM.24.0850	221	K	6.18172	5.64862e-07	Up	triosephosphate isomerase OS=Leishmania_mexicana_MHOM/GT/2001/U1103 GN=LmxM.24.0850	LmxM.24.0850	1	7.97898e-19	128.68	2	ILYGGSVSASNAK(1)TLYMK	4.1495	252090	245490	251960	0	0	47578	45854	43203	44920	241800	254570	215330	105690	89210	0	73706	70912	63820	2.09386	2.0769	2.09943			0.387579	0.331803	0.312999	0.320035	2.04616	2.13213	1.81181	0.817316	0.705426		0.380415	0.369919	0.336652
LmxM.24.0850	206	K	7.32022	9.57083e-10	Up	triosephosphate isomerase OS=Leishmania_mexicana_MHOM/GT/2001/U1103 GN=LmxM.24.0850	LmxM.24.0850	1	2.4547e-10	150.53	2	VGADVATK(1)LR	0.55689	566980	577760	558850	70738	77619	74816	93494	97338	94801	418530	411880	427670	69083	71610	68523	83086	88676	88094	2.93513	3.04648	2.90225	0.358476	0.406747	0.379855	0.421654	0.439521	0.420959	2.20739	2.15004	2.24277	0.332963	0.352923	0.332946	0.267271	0.288311	0.289627
LmxM.24.0850	154	K	5.68486	2.13055e-09	Up	triosephosphate isomerase OS=Leishmania_mexicana_MHOM/GT/2001/U1103 GN=LmxM.24.0850	LmxM.24.0850	1	2.26214e-41	162.23	2	VVLSQTSAIAAK(1)VPK	-1.7959	1324700	1154200	1166700	238260	228120	216820	234390	234770	239730	928400	933390	888820	181730	199120	203870	213920	168880	193550	3.01878	2.67908	2.66718	0.531512	0.526228	0.484592	0.465334	0.466653	0.468601	2.15547	2.14483	2.05184	0.385572	0.431992	0.436058	0.30292	0.241706	0.280117
LmxM.24.0990	215	K	2.02985	0.00100406	Up	replication factor C, subunit 1, putative OS=Leishmania_mexicana_MHOM/GT/2001/U1103 GN=LmxM.24.0990	LmxM.24.0990	1	1.21929e-66	158.59	2	PLLQDIIK(1)K	-0.32535	313330	283270	258240	154040	149580	142080	126820	119900	122020	280960	303150	276680	191680	199810	202680	30698	30454	36420	1.71824	1.52229	1.34099	0.981877	0.958397	0.880631	0.596369	0.537223	0.559635	1.73607	1.69963	1.66718	1.03124	0.987939	1.06399	0.207734	0.201352	0.244692
LmxM.24.1630	464	K	2.08818	0.0421255	Up	Succinate dehydrogenase [ubiquinone] flavoprotein subunit, mitochondrial OS=Leishmania_mexicana_MHOM/GT/2001/U1103 GN=LmxM.24.1630	LmxM.24.1630	1	0.000140287	85.821	2	ILSNK(1)GDIPIAR	-1.3318	90163	79558	0	25943	31274	28743	63996	0	65177	0	60392	69618	52380	50310	52405	39493	36494	43853	1.72684	1.51803		0.501112	0.600116	0.558592	1.10661		1.11838		1.2381	1.40709	0.958553	0.919186	0.96139	0.786497	0.714323	0.877524
LmxM.24.1630	209	K	3.88036	9.16874e-12	Up	Succinate dehydrogenase [ubiquinone] flavoprotein subunit, mitochondrial OS=Leishmania_mexicana_MHOM/GT/2001/U1103 GN=LmxM.24.1630	LmxM.24.1630	1	1.41395e-44	133.07	2	SK(1)YTVLCTGGYGR	0.88364	351210	351330	345220	86925	87164	91528	102560	102050	101120	187970	204890	197740	80365	69234	75112	51209	48799	51945	2.4649	2.45652	2.46987	0.615271	0.612909	0.651814	0.649868	0.643901	0.635826	1.40646	1.53923	1.46454	0.53892	0.463527	0.504944	0.373706	0.350018	0.380899
LmxM.24.1630	229	K	1.75965	2.0708e-06	Up	Succinate dehydrogenase [ubiquinone] flavoprotein subunit, mitochondrial OS=Leishmania_mexicana_MHOM/GT/2001/U1103 GN=LmxM.24.1630	LmxM.24.1630	1	2.45521e-188	208.01	2	VYFTTTSAK(1)SCTGDGTAMVAR	-1.1244	331950	331480	338460	176630	180670	169840	228660	225510	227830	265180	278700	272230	160550	150520	155590	65696	73350	79696	1.62302	1.61466	1.68696	0.870974	0.885043	0.842615	1.00939	0.991268	0.998003	1.38229	1.45861	1.40463	0.750045	0.702052	0.728677	0.333997	0.366522	0.40712
LmxM.24.1640	310	K	2.27569	0.000193676	Up	Male sterility protein, putative OS=Leishmania_mexicana_MHOM/GT/2001/U1103 GN=LmxM.24.1640	LmxM.24.1640	1	1.06102e-05	120.33	2	ALFK(1)TQQHYK	1.2272	217540	182800	188760	123560	122240	123030	110480	113100	108930	140470	140930	141970	62817	63703	67407	0	0	0	1.92475	1.51661	1.6344	0.644914	0.625032	0.60076	0.856646	0.885153	0.848355	1.06875	1.03331	1.0163	0.649387	0.585368	0.693972
LmxM.24.1640	153	K	2.11839	0.0119264	Up	Male sterility protein, putative OS=Leishmania_mexicana_MHOM/GT/2001/U1103 GN=LmxM.24.1640	LmxM.24.1640	1	0.00066866	93.467	2	VLALAK(1)TCR	0.42931	0	199000	192410	108740	110700	0	122420	117690	116930	0	124930	0	0	36259	41431	0	0	0		1.79392	1.8102	0.616688	0.615019		1.03139	1.0008	0.989483		0.995284			0.362024	0.463462
LmxM.24.1740	352	K	3.83041	0.000926363	Up	folate-binding protein YgfZ, putative OS=Leishmania_mexicana_MHOM/GT/2001/U1103 GN=LmxM.24.1740	LmxM.24.1740	1	9.67403e-09	99.589	2	YVDK(1)ATQTVPGLQLK	-1.0325	101620	0	91511	0	24096	24298	0	22378	0	53598	0	61805	42461	33074	37542	22983	23073	25855	2.22387		2.02172		0.518451	0.505882		0.638256		1.3838		1.60048	0.988603	0.788538	0.858575	0.453156	0.452405	0.504186
LmxM.24.1980	78	K	12.8024	3.14591e-05	Up	hypothetical protein, conserved OS=Leishmania_mexicana_MHOM/GT/2001/U1103 GN=LmxM.24.1980	LmxM.24.1980	1	1.13817e-06	117.45	2	TTK(1)QEAADLLK(1)GK	-0.40375	595790	545200	506040	41941	0	0	0	48356	0	308750	300500	316100	0	0	53737	0	0	33788	2.11605	1.94518	1.82283	0.147697				0.158708		1.27758	1.20859	1.33448			0.179897			0.139179
LmxM.24.1980	88	K	15.8182	7.63477e-08	Up	hypothetical protein, conserved OS=Leishmania_mexicana_MHOM/GT/2001/U1103 GN=LmxM.24.1980	LmxM.24.1980	1	2.03414e-16	163.59	3	GK(1)DLRPAESYKPR	-1.3905	1189900	1324000	1258400	98637	99068	97052	70332	66147	70662	802310	781520	805680	111410	106200	116160	47308	0	57902	2.78185	3.10945	2.98381	0.228645	0.223228	0.218024	0.15388	0.142905	0.155456	2.18532	2.06902	2.23893	0.254089	0.237464	0.255976	0.126489		0.156999
LmxM.24.1980	27	K	8.25847	2.64247e-09	Up	hypothetical protein, conserved OS=Leishmania_mexicana_MHOM/GT/2001/U1103 GN=LmxM.24.1980	LmxM.24.1980	1	6.34123e-29	163.59	2	ICECGK(1)HQCPGLR	-1.7174	382810	416590	432110	50610	50253	44929	53400	59054	57231	126470	134030	136300	42531	42171	48000	21582	0	13663	3.01016	3.2907	3.44612	0.394587	0.380856	0.339477	0.392964	0.429112	0.423484	1.15863	1.19347	1.27396	0.326251	0.317155	0.355768	0.194085		0.124604
LmxM.24.1980	68	K	6.5412	6.53046e-08	Up	hypothetical protein, conserved OS=Leishmania_mexicana_MHOM/GT/2001/U1103 GN=LmxM.24.1980	LmxM.24.1980	1	1.92337e-07	106.11	2	QTVFPSK(1)AEPGHFK	-3.6218	320160	328270	345300	49642	57132	0	53067	0	53044	186920	174430	188120	84059	63664	77621	0	32973	45454	2.27729	2.34561	2.49102	0.350106	0.391672		0.353249		0.355047	1.54902	1.40499	1.59053	0.583277	0.433108	0.520415		0.27607	0.374976
LmxM.24.2030	4	K	1.69918	0.00011038	Up	3-oxoacyl-(acyl-carrier protein) reductase, putative OS=Leishmania_mexicana_MHOM/GT/2001/U1103 GN=LmxM.24.2030	LmxM.24.2030	1	5.79171e-48	176.45	3	MQGK(1)SIQSITGRPILVTGAASGLGAATAR	0.21651	196890	252050	236460	97890	103190	95418	165080	171570	170510	140890	183450	172260	80472	109390	83193	89390	89295	0	1.45687	1.86997	1.77212	0.940535	1.02078	0.880868	1.01863	1.07969	1.06115	0.997768	1.30892	1.25967	0.633178	0.886184	0.671599	0.445794	0.459863
LmxM.24.2060	664	K	7.00925	3.77334e-05	Up	transketolase, putative OS=Leishmania_mexicana_MHOM/GT/2001/U1103 GN=LmxM.24.2060	LmxM.24.2060	1	1.9217e-05	70.598	3	RFPDGTAPLK(1)NSSFSK	-0.49515	413870	435480	415530	0	64597	0	0	49869	49033	227590	215650	243430	0	0	50039	0	0	0	1.84998	1.88735	1.84853		0.320067			0.239436	0.237425	1.01781	0.981066	1.13295			0.233427
LmxM.24.2060	636	K	4.20391	4.50571e-06	Up	transketolase, putative OS=Leishmania_mexicana_MHOM/GT/2001/U1103 GN=LmxM.24.2060	LmxM.24.2060	1	6.03876e-86	159.83	3	YSHAHVGMSGFGASAPAGVLYK(1)K	0.32789	302580	303210	293620	67794	71461	72346	54673	0	54481	186170	189730	188290	75371	78443	72195	54685	50388	57962	2.29049	2.22543	2.21205	0.564973	0.599629	0.608942	0.44705		0.446754	1.40997	1.46174	1.48405	0.583478	0.623494	0.57034	0.402041	0.372304	0.434794
LmxM.24.2070	125	K	6.45245	0.000255155	Up	40S ribosomal protein S8, putative OS=Leishmania_mexicana_MHOM/GT/2001/U1103 GN=LmxM.24.2070	LmxM.24.2070	1	1.08537e-21	162.8	2	HYGIDLDAGK(1)R	1.8061	1643300	1447300	1492400	0	0	271050	0	0	229320	1162400	1147600	1191300	227820	236430	229760	0	0	0	2.01939	1.61346	1.7827			0.266506			0.293028	1.20921	1.09668	1.1587	0.303552	0.31263	0.312794
LmxM.24.2070	148	K	6.06638	2.19943e-07	Up	40S ribosomal protein S8, putative OS=Leishmania_mexicana_MHOM/GT/2001/U1103 GN=LmxM.24.2070	LmxM.24.2070	1	1.32594e-50	208.63	2	SAHAAADK(1)YDVNK(1)ASPK	-1.1325	272170	253950	273540	52030	57652	56940	33207	44093	39296	165330	191920	173840	53120	48513	52911	22435	34916	32123	2.73317	2.31351	2.67016	0.449662	0.469737	0.457508	0.319168	0.437723	0.410335	1.40547	1.49876	1.38173	0.578393	0.524215	0.588645	0.277099	0.444866	0.414303
LmxM.24.2070	110	K	16.6649	1.57719e-09	Up	40S ribosomal protein S8, putative OS=Leishmania_mexicana_MHOM/GT/2001/U1103 GN=LmxM.24.2070	LmxM.24.2070	1	2.89009e-35	183.57	2	TLVK(1)NCIVAVDAAPFK(1)R	-1.5122	867350	909870	970010	59290	75432	66673	52563	56831	42556	729600	700180	743010	115670	112080	108630	72852	65961	78555	2.77722	2.64296	3.01913	0.163382	0.195968	0.170813	0.161086	0.179889	0.14169	1.97763	1.74345	1.88303	0.401582	0.386161	0.385342	0.286906	0.267967	0.323046
LmxM.24.2070	98	K	3.86775	5.42961e-07	Up	40S ribosomal protein S8, putative OS=Leishmania_mexicana_MHOM/GT/2001/U1103 GN=LmxM.24.2070	LmxM.24.2070	1	8.59092e-108	244.37	2	TLVK(1)NCIVAVDAAPFK(1)R	-1.5122	1193800	1118000	1166700	389290	375560	391950	258920	260010	259660	1155500	1232600	1175800	309790	327720	321490	134130	150510	148630	2.14793	1.82484	2.0405	0.602792	0.548253	0.564252	0.445878	0.462468	0.485799	1.75995	1.72462	1.67444	0.604357	0.634476	0.64082	0.296822	0.343583	0.343455
LmxM.24.2110	452	K	3.22417	0.000488878	Up	3-hydroxy-3-methylglutaryl-CoA synthase, putative OS=Leishmania_mexicana_MHOM/GT/2001/U1103 GN=LmxM.24.2110	LmxM.24.2110	1	4.59309e-43	122.16	3	ALENPVNLDK(1)AQYEALHTGAEK	1.1509	205880	159420	148280	0	0	0	58891	57619	56811	137760	163410	137680	54979	53452	64083	0	0	0	1.91724	1.44254	1.32518				0.485501	0.484274	0.483297	1.0246	1.2205	1.02974	0.46027	0.446986	0.549702
LmxM.24.2110	464	K	3.26342	0.00206626	Up	3-hydroxy-3-methylglutaryl-CoA synthase, putative OS=Leishmania_mexicana_MHOM/GT/2001/U1103 GN=LmxM.24.2110	LmxM.24.2110	1	8.15713e-38	188.85	3	AQYEALHTGAEK(1)NDLVTDRR	0.6653	176980	176300	173090	33140	0	35709	71744	74309	74782	133050	137590	126360	92227	88042	90171	0	0	0	1.68271	1.62877	1.57938	0.293004		0.313741	0.60388	0.637663	0.649536	1.01035	1.04923	0.964917	0.788312	0.7517	0.789724
LmxM.24.2110	366	K	12.7921	4.30262e-06	Up	3-hydroxy-3-methylglutaryl-CoA synthase, putative OS=Leishmania_mexicana_MHOM/GT/2001/U1103 GN=LmxM.24.2110	LmxM.24.2110	1	0.00126228	84.368	2	K(1)FIDLLEK(1)K	0.090443	187510	175610	175630	11351	9763.2	10663	16131	18150	24387	128220	129680	120300	21368	18885	25488	0	0	0	2.64061	2.40299	2.3736	0.148645	0.126731	0.138761	0.201104	0.230686	0.313732	1.44214	1.4647	1.36063	0.270519	0.238817	0.330627
LmxM.24.2110	125	K	1.7626	0.000128548	Up	3-hydroxy-3-methylglutaryl-CoA synthase, putative OS=Leishmania_mexicana_MHOM/GT/2001/U1103 GN=LmxM.24.2110	LmxM.24.2110	1	1.33584e-50	119.26	3	HCEVPEFK(1)HACLAGVYAMESATR	-0.31962	548180	520170	476130	273020	280080	280610	342460	352900	351370	442310	490030	432120	386310	380450	387000	30118	0	0	1.47937	1.36402	1.23313	0.685145	0.696699	0.699783	0.818166	0.859543	0.866238	0.953344	1.06065	0.936593	0.937222	0.921974	0.962024	0.169927
LmxM.24.2110	39	K	2.61119	0.00363223	Up	3-hydroxy-3-methylglutaryl-CoA synthase, putative OS=Leishmania_mexicana_MHOM/GT/2001/U1103 GN=LmxM.24.2110	LmxM.24.2110	1	4.7571e-70	170.95	2	WTGNSWDK(1)VSSVVGQSFR	3.861	199050	171550	212970	0	53063	49034	98226	98319	102880	286500	296810	227110	130630	155690	129670	0	0	0	1.26954	1.06316	1.30356		0.311951	0.288994	0.554613	0.56596	0.599426	1.45942	1.51831	1.16336	0.749	0.89169	0.76181
LmxM.25.0080	185	K	12.2343	1.61686e-05	Up	poly(A)-binding protein, putative OS=Leishmania_mexicana_MHOM/GT/2001/U1103 GN=LmxM.25.0080	LmxM.25.0080	1	1.94148e-11	162.59	2	EVMAAK(1)SFR	1.0449	635950	577570	566320	64139	66082	0	0	0	0	370880	367700	355120	0	0	0	0	0	0	1.79355	1.6694	1.58572	0.13469	0.14042					0.993186	1.00791	0.961054
LmxM.25.0540	241	K	11.3498	3.16661e-08	Up	hypothetical protein, conserved OS=Leishmania_mexicana_MHOM/GT/2001/U1103 GN=LmxM.25.0540	LmxM.25.0540	1	2.08756e-246	301.59	2	AYNK(1)SNFFDTISCDQK	-0.35902	2058800	2069100	2095800	198600	207540	207640	152290	145280	153840	1255600	1338600	1279100	191240	190280	188780	61565	65861	65892	3.04095	2.97847	3.04188	0.292555	0.293136	0.295954	0.244883	0.231436	0.238776	1.81701	1.9339	1.83203	0.303203	0.287578	0.286768	0.0978805	0.108314	0.10738
LmxM.25.0540	72	K	14.1614	4.72326e-06	Up	hypothetical protein, conserved OS=Leishmania_mexicana_MHOM/GT/2001/U1103 GN=LmxM.25.0540	LmxM.25.0540	1	9.87272e-39	187.85	2	GSDIK(1)DLTVFR	-2.1284	4006500	3984400	3958100	245010	259650	0	0	222810	357890	2793400	2876600	2773600	237540	228700	221990	187690	218160	221150	2.75226	2.6675	2.67184	0.167858	0.170563			0.165078	0.258346	1.88004	1.93283	1.84757	0.175154	0.160753	0.156834	0.138782	0.166864	0.167613
LmxM.25.0590	13	K	18.999	1.10684e-07	Up	hypothetical protein, conserved OS=Leishmania_mexicana_MHOM/GT/2001/U1103 GN=LmxM.25.0590	LmxM.25.0590	1	6.26832e-20	146.88	2	VAPK(1)TLHQFR	-0.4739	2254500	1591800	1568400	153050	148930	151340	91042	92366	91658	919420	950160	965360	101500	92758	101120	0	0	84462	4.30118	3.01093	3.31366	0.213609	0.213234	0.227149	0.142642	0.157701	0.164227	1.50671	1.91827	1.88123	0.162505	0.143362	0.148219			0.151684
LmxM.25.0720	50	K	7.53645	1.3085e-06	Up	eukaryotic initiation factor 5a, putative OS=Leishmania_mexicana_MHOM/GT/2001/U1103 GN=LmxM.25.0720	LmxM.25.0720	1	4.13519e-10	152.17	3	VIDLSVSK(1)TGK(1)HGHAK	1.4459	1830700	1690600	1635100	239480	234360	221710	168540	155890	166190	5303900	5878200	5646100	5432200	4765000	4522700	1560500	1647800	1716700	0.697877	0.669663	0.659799	0.111034	0.107977	0.100038	0.0755918	0.0708671	0.0725016	2.11914	2.48299	2.36035	2.41447	2.2006	2.11679	0.571484	0.611227	0.639603
LmxM.25.0750	119	K	2.75092	0.00531621	Up	protein phosphatase, putative OS=Leishmania_mexicana_MHOM/GT/2001/U1103 GN=LmxM.25.0750	LmxM.25.0750	1	1.09557e-05	111.38	2	EGNK(1)VHLQVGNVGDSR	-1.3761	44875	52226	54232	14517	0	0	0	0	21513	40116	40451	0	0	19714	0	9310.9	0	18056	1.46225	1.68993	1.78155	0.504486					0.691173	1.29883	1.30061			0.680284		0.244156		0.46981
LmxM.25.0750	322	K	6.44384	1.85585e-05	Up	protein phosphatase, putative OS=Leishmania_mexicana_MHOM/GT/2001/U1103 GN=LmxM.25.0750	LmxM.25.0750	1	2.57431e-10	136.06	2	GNTTVGALLEK(1)R	0.51391	454800	362080	365160	54762	57676	58160	0	0	0	264900	244300	257390	74301	0	0	71023	63493	84205	2.51585	1.989	2.03645	0.323071	0.346856	0.345198				1.45601	1.33349	1.42939	0.426426			0.31617	0.27862	0.371951
LmxM.25.0910	101	K	4.46649	0.000315291	Up	cyclophilin a, putative OS=Leishmania_mexicana_MHOM/GT/2001/U1103 GN=LmxM.25.0910	LmxM.25.0910	1	4.62912e-43	187.01	2	SIYGSK(1)FADESFVGK(1)AGK	2.3961	695620	720290	721970	82419	80225	78297	191830	197680	196460	466280	465300	497140	165580	159070	161690	144880	137900	149140	2.21341	2.31348	2.3029	0.321366	0.313328	0.307851	0.694158	0.708278	0.713252	1.51224	1.53425	1.63321	0.583846	0.562961	0.57257	0.438181	0.412545	0.431729
LmxM.25.0910	4	K	3.63557	2.56246e-07	Up	cyclophilin a, putative OS=Leishmania_mexicana_MHOM/GT/2001/U1103 GN=LmxM.25.0910	LmxM.25.0910	1	7.09437e-51	176.97	2	PYK(1)PYYPVVESNPK	19.609	10606000	11403000	11686000	2906300	2785800	2841800	2357300	2397100	2400300	8017200	8553900	8668900	2830500	2783700	2833800	1927700	1996600	1999500	2.01425	2.186	2.22481	0.676372	0.649399	0.666901	0.50913	0.512624	0.520123	1.55192	1.68344	1.69981	0.595697	0.588009	0.598945	0.347981	0.356509	0.34547
LmxM.25.0910	25	K	3.42672	5.13314e-09	Up	cyclophilin a, putative OS=Leishmania_mexicana_MHOM/GT/2001/U1103 GN=LmxM.25.0910	LmxM.25.0910	1	2.12122e-27	166.71	2	VWMDIEIGGK(1)SAGR	0.36313	629260	630730	572120	152070	152460	148640	158310	149180	147610	186900	244320	214840	75689	0	0	0	56477	73136	2.46759	2.49664	2.24903	0.730751	0.733836	0.720252	0.705997	0.658726	0.660446	0.747027	0.992829	0.869826	0.328909				0.208225	0.260917
LmxM.25.0910	54	K	2.25444	1.0074e-07	Up	cyclophilin a, putative OS=Leishmania_mexicana_MHOM/GT/2001/U1103 GN=LmxM.25.0910	LmxM.25.0910	1	5.1875e-44	144.16	2	VLCTGEK(1)GFGYSNSPFHR	-2.0028	456950	467500	462880	176190	163980	152980	177670	179690	197250	462770	455380	450650	170970	182210	187440	151550	149120	148030	1.61128	1.664	1.6362	0.76132	0.709731	0.666567	0.712474	0.713474	0.793595	1.66323	1.66399	1.64065	0.668072	0.71462	0.735565	0.507941	0.494375	0.474876
LmxM.25.0980	1534	K	4.19087	1.3725e-05	Up	dynein heavy chain, putative OS=Leishmania_mexicana_MHOM/GT/2001/U1103 GN=LmxM.25.0980	LmxM.25.0980	1	1.50314e-10	131.54	3	DQELHFSEFK(1)HR	0.30394	69820	71715	69017	15082	14585	0	11777	16527	11380	33124	33913	37630	19537	19999	17633	10589	11025	8911.2	2.24279	2.31238	2.2036	0.611264	0.591316		0.438722	0.621218	0.42538	1.1839	1.223	1.36783	0.663991	0.678677	0.601916	0.390739	0.412311	0.330139
LmxM.25.1120	369	K	3.95599	1.90105e-08	Up	aldehyde dehydrogenase, mitochondrial precursor OS=Leishmania_mexicana_MHOM/GT/2001/U1103 GN=LmxM.25.1120	LmxM.25.1120	1	1.05665e-15	170.69	2	AGATVVTGGK(1)R	0.12798	161800	129310	131270	88219	88143	91495	64300	65057	65682	93544	94999	95920	43789	41800	43238	34337	35833	35699	3.02639	2.56998	2.51705	0.696075	0.70805	0.731087	0.633349	0.661706	0.671576	1.80588	1.83579	1.89082	0.805774	0.780697	0.802562	0.395313	0.413719	0.420107
LmxM.25.1120	415	K	2.4163	5.98417e-05	Up	aldehyde dehydrogenase, mitochondrial precursor OS=Leishmania_mexicana_MHOM/GT/2001/U1103 GN=LmxM.25.1120	LmxM.25.1120	1	0.000172914	106.35	2	FKDMDEVVK(1)R	0.59701	230190	195170	198860	175420	178280	0	184140	184630	172870	136600	153240	147420	93926	0	94787	92440	83522	0	2.17063	1.95553	1.92232	0.697792	0.72199		0.914393	0.946729	0.891089	1.32947	1.49289	1.46504	0.871338		0.886981	0.536527	0.486156
LmxM.25.1120	35	K	3.25814	3.94843e-09	Up	aldehyde dehydrogenase, mitochondrial precursor OS=Leishmania_mexicana_MHOM/GT/2001/U1103 GN=LmxM.25.1120	LmxM.25.1120	1	2.78801e-201	246.8	2	FVSAVSGK(1)TFEVVNPADEK	-1.3048	545570	532760	510720	382900	376450	375490	317200	312150	335480	395920	383500	398080	206850	201250	195860	208900	243640	211440	2.33638	2.42424	2.2421	0.691713	0.692357	0.686937	0.715339	0.72691	0.785348	1.74996	1.69674	1.79662	0.871465	0.860575	0.832348	0.550635	0.644047	0.569688
LmxM.25.1120	152	K	6.34787	9.21388e-11	Up	aldehyde dehydrogenase, mitochondrial precursor OS=Leishmania_mexicana_MHOM/GT/2001/U1103 GN=LmxM.25.1120	LmxM.25.1120	1	1.05245e-12	184.04	2	SGNFLGIVK(1)R	-0.74284	849260	743300	747700	298740	310560	304970	228900	223340	230940	451090	492450	437730	130170	129940	129350	123900	122050	131850	3.66555	3.4089	3.30831	0.543926	0.575671	0.562318	0.520272	0.524191	0.54488	2.00951	2.19593	1.99113	0.552728	0.560018	0.554028	0.329157	0.325172	0.358044
LmxM.25.1170	181	K	3.03858	0.000121885	Up	ATP synthase subunit beta, mitochondrial, putative OS=Leishmania_mexicana_MHOM/GT/2001/U1103 GN=LmxM.25.1170	LmxM.25.1170	1	4.01428e-06	77.358	2	GGK(1)IGLFGGAGVGK	-3.1376	434780	403250	432450	128750	134810	133090	98329	0	0	360740	392500	379040	167150	0	150160	116700	0	120740	1.60907	1.49262	1.59907	0.525187	0.589255	0.551052	0.397209			1.50901	1.66524	1.62157	0.682476		0.617765	0.478854		0.505607
LmxM.25.1170	104	K	3.16332	5.37298e-07	Up	ATP synthase subunit beta, mitochondrial, putative OS=Leishmania_mexicana_MHOM/GT/2001/U1103 GN=LmxM.25.1170	LmxM.25.1170	1	1.20136e-122	245.56	2	SK(1)VVSTGGNISVPVGR	-0.68716	1549900	1432500	1415100	377320	377820	357590	459730	461500	475760	1003100	1038500	1015000	486100	444470	479410	332670	342610	350400	2.05345	1.8982	1.87323	0.550998	0.591207	0.530036	0.664834	0.668253	0.677441	1.50216	1.57731	1.5545	0.710525	0.646035	0.706072	0.488674	0.508592	0.52529
LmxM.25.1420	59	K	1.93276	0.000242387	Up	GTP-binding protein, putative OS=Leishmania_mexicana_MHOM/GT/2001/U1103 GN=LmxM.25.1420	LmxM.25.1420	1	2.04603e-31	163.09	2	GK(1)ICFNCWDTAGQEK	0.84844	205780	209050	214410	99084	98253	106410	138590	138510	0	220240	218270	214770	117610	116220	114000	63287	63722	67366	1.59758	1.53136	1.55643	0.729204	0.688049	0.755441	0.933747	0.933876		1.65822	1.61931	1.60447	0.85942	0.830697	0.798584	0.423655	0.41687	0.424455
LmxM.25.1420	167	K	6.63824	1.89407e-06	Up	GTP-binding protein, putative OS=Leishmania_mexicana_MHOM/GT/2001/U1103 GN=LmxM.25.1420	LmxM.25.1420	1	4.62564e-30	121.86	2	PFVWLAK(1)K	-1.4464	208740	203290	193880	31136	31247	32751	0	0	0	143300	161160	145100	31600	28936	0	0	0	0	2.08273	1.91386	1.80878	0.294494	0.281222	0.298821				1.38663	1.5366	1.39313	0.296767	0.265808
LmxM.25.1420	38	K	6.13793	1.1631e-08	Up	GTP-binding protein, putative OS=Leishmania_mexicana_MHOM/GT/2001/U1103 GN=LmxM.25.1420	LmxM.25.1420	1	3.32353e-11	158.37	3	RHLTGEFEK(1)R	-0.9096	1154300	1077400	1094700	198320	196820	210170	183720	175920	193500	740190	737160	763150	170510	171270	177290	137200	131500	140900	2.98216	2.62637	2.64444	0.485696	0.458665	0.496525	0.411914	0.394708	0.441665	1.85457	1.81991	1.89723	0.414632	0.407376	0.413288	0.305636	0.286279	0.29543
LmxM.25.1420	143	K	2.68894	8.37943e-08	Up	GTP-binding protein, putative OS=Leishmania_mexicana_MHOM/GT/2001/U1103 GN=LmxM.25.1420	LmxM.25.1420	1	3.80734e-16	153.25	2	K(1)GLQYYDISAK	1.3339	355700	318440	324590	134320	133950	128270	130970	131780	136090	247990	260180	264130	151230	142010	0	82015	87783	92458	2.12786	1.79744	1.8156	0.761702	0.722795	0.701684	0.679936	0.684631	0.719258	1.43873	1.48733	1.52045	0.851525	0.782131		0.423048	0.442507	0.448884
LmxM.25.1420	24	K	13.8384	1.18359e-08	Up	GTP-binding protein, putative OS=Leishmania_mexicana_MHOM/GT/2001/U1103 GN=LmxM.25.1420	LmxM.25.1420	1	7.84547e-80	183	2	LILVGDGGTGK(1)TTFVK(1)R	0.6795	3508300	3371500	3384700	298810	283850	283390	232830	232040	251480	2352600	2436800	2403600	404130	384960	409890	264020	283740	310120	3.28839	2.98179	2.96642	0.265501	0.239988	0.242901	0.189392	0.188885	0.208252	2.13856	2.18264	2.16793	0.35654	0.332203	0.346665	0.213383	0.224108	0.23591
LmxM.25.1420	100	K	6.9485	4.20348e-08	Up	GTP-binding protein, putative OS=Leishmania_mexicana_MHOM/GT/2001/U1103 GN=LmxM.25.1420	LmxM.25.1420	1	6.03769e-63	225.68	2	NTYK(1)NVPNWYR	-2.6966	1985300	2308200	2271000	344280	375210	394080	314070	302410	282000	1433400	1532700	1517200	395240	377940	368360	202630	198790	209290	2.6504	2.90754	2.83484	0.435695	0.451828	0.481092	0.363872	0.350614	0.332609	1.85583	1.95532	1.94906	0.496646	0.464526	0.443725	0.233253	0.223631	0.226759
LmxM.25.1420	124	K	7.341	2.39809e-10	Up	GTP-binding protein, putative OS=Leishmania_mexicana_MHOM/GT/2001/U1103 GN=LmxM.25.1420	LmxM.25.1420	1	2.86705e-103	222.25	2	VCDNIPIVLVGNK(1)VDCADR	2.3282	3286100	3229800	3236800	426480	451780	445460	503940	490350	529450	2109600	2325000	2243200	683090	588270	666560	490160	475380	452550	2.87093	2.66247	2.64413	0.353204	0.356026	0.355884	0.382083	0.372045	0.408664	1.78743	1.94106	1.88584	0.56172	0.473173	0.525456	0.369247	0.349972	0.320877
LmxM.25.1610	59	K	4.09007	6.83767e-06	Up	Eukaryotic translation initiation factor 3 subunit F OS=Leishmania_mexicana_MHOM/GT/2001/U1103 GN=LmxM.25.1610	LmxM.25.1610	1	5.94471e-08	108.93	2	DTEVPNTK(1)AHR	-0.46805	145840	138820	162580	36558	0	37134	33106	40866	0	118440	120340	114020	45117	53601	0	0	0	0	1.751	1.59481	1.89926	0.409748		0.410832	0.395318	0.493957		1.23469	1.25628	1.16656	0.499505	0.573405
LmxM.25.1620	137	K	17.4887	1.73035e-06	Up	hypothetical protein, conserved OS=Leishmania_mexicana_MHOM/GT/2001/U1103 GN=LmxM.25.1620	LmxM.25.1620	1	1.01149e-22	162.21	3	DYYHK(1)SGAAGAHH	-1.2151	239940	249830	234930	27409	26886	26588	14531	13544	14709	116780	115520	118610	0	27960	32538	8713.8	9787	9821.3	3.81521	4.19178	3.91313	0.296363	0.295631	0.282729	0.164181	0.154513	0.169761	1.84849	1.87572	1.90038		0.376989	0.443789	0.113404	0.127551	0.123904
LmxM.25.1690	70	K	3.17054	0.00557684	Up	hypothetical protein, conserved OS=Leishmania_mexicana_MHOM/GT/2001/U1103 GN=LmxM.25.1690	LmxM.25.1690	1	1.02016e-15	113.34	2	IAK(1)HPDLDVAALQK	-3.1214	253070	229790	226670	43688	0	0	91978	0	97873	160790	171660	165200	99350	0	102410	0	0	0	1.78614	1.51739	1.63474	0.324089			0.603074		0.630385	1.14207	1.24091	1.11474	0.752315		0.694674
LmxM.25.1710	219	K	4.7764	3.65314e-06	Up	pyruvate dehydrogenase E1 beta subunit, putative OS=Leishmania_mexicana_MHOM/GT/2001/U1103 GN=LmxM.25.1710	LmxM.25.1710	1	0.00123887	58.426	2	NFVIPFGK(1)AK	-1.2026	108320	108610	110210	0	20018	21376	0	0	19632	0	0	84440	0	28720	0	0	18866	0	1.73558	1.78427	1.70098		0.380954	0.377291			0.334804			1.42538		0.501151			0.351214
LmxM.25.1710	276	K	11.92	2.72873e-08	Up	pyruvate dehydrogenase E1 beta subunit, putative OS=Leishmania_mexicana_MHOM/GT/2001/U1103 GN=LmxM.25.1710	LmxM.25.1710	1	0.000997843	103.8	2	QTIFNSIK(1)K	0.26701	795990	704840	750720	54087	0	53430	61392	0	61798	393860	406020	405190	0	100220	102390	0	52742	61530	2.57737	2.33999	2.34148	0.196578		0.190576	0.211819		0.212977	1.35889	1.39108	1.38221		0.353404	0.364586		0.198418	0.23596
LmxM.25.1770	29	K	5.3554	6.13265e-06	Up	3-oxo-5-alpha-steroid 4-dehydrogenase, putative OS=Leishmania_mexicana_MHOM/GT/2001/U1103 GN=LmxM.25.1770	LmxM.25.1770	1	1.88802e-15	98.865	3	KQELELAASATLADLK(1)K	-5.6121	111670	128290	107470	25577	0	0	26066	27719	0	42579	0	0	24725	0	21974	0	0	0	2.1513	2.49804	2.20983	0.44848			0.408535	0.42378		0.742156			0.440488		0.38344
LmxM.25.2010	269	K	5.99716	7.72395e-07	Up	2,4-dihydroxyhept-2-ene-1,7-dioic acid aldolase, putative OS=Leishmania_mexicana_MHOM/GT/2001/U1103 GN=LmxM.25.2010	LmxM.25.2010	1	2.33304e-34	195.8	2	GK(1)SWTNQPSALV	-0.5567	1380800	1463100	1485700	231940	235180	222840	172390	160620	146000	1019500	1071300	1079500	323580	293310	307280	182250	184280	198780	2.20422	2.35722	2.49634	0.458898	0.4886	0.448668	0.341083	0.32713	0.289331	1.74035	1.83712	1.8123	0.571829	0.510692	0.544715	0.284064	0.296122	0.331959
LmxM.25.2010	69	K	4.39593	2.1009e-05	Up	2,4-dihydroxyhept-2-ene-1,7-dioic acid aldolase, putative OS=Leishmania_mexicana_MHOM/GT/2001/U1103 GN=LmxM.25.2010	LmxM.25.2010	1	7.32239e-13	158.37	2	TGHSK(1)VMVR	3.626	846130	612040	779800	132590	147580	128170	0	137080	0	344660	430350	479460	0	0	0	0	0	0	1.88782	1.37818	1.83128	0.366649	0.428529	0.360676		0.390207		0.822316	1.03145	1.12501
LmxM.25.2020	3	K	13.5078	5.10377e-05	Up	hypothetical protein, conserved OS=Leishmania_mexicana_MHOM/GT/2001/U1103 GN=LmxM.25.2020	LmxM.25.2020	1	5.0343e-19	174.92	2	MQK(1)TTLQILR	-0.35953	176610	203050	200740	0	0	0	12708	12184	0	124220	126330	122400	14356	13457	14603	0	0	0	1.63915	1.95599	1.93169				0.138202	0.13457		1.30976	1.33327	1.29056	0.15518	0.147765	0.163305
LmxM.25.2140	290	K	9.19632	2.30605e-09	Up	succinyl-CoA synthetase alpha subunit, putative OS=Leishmania_mexicana_MHOM/GT/2001/U1103 GN=LmxM.25.2140	LmxM.25.2140	1	2.27076e-100	204.43	3	AAGVTISDSPAHLGK(1)HMAELFSTK	-0.29816	2623500	2541800	2362600	329310	296930	315510	261670	270040	266600	1305200	1678900	1469600	519360	482910	499740	325800	329390	330990	3.21234	3.05473	2.78407	0.367778	0.334532	0.353926	0.297354	0.310391	0.304447	1.48775	1.94042	1.74646	0.596817	0.545034	0.581621	0.30116	0.309801	0.30997
LmxM.25.2140	32	K	6.39631	1.70856e-05	Up	succinyl-CoA synthetase alpha subunit, putative OS=Leishmania_mexicana_MHOM/GT/2001/U1103 GN=LmxM.25.2140	LmxM.25.2140	1	2.80088e-187	262.3	3	VIVQGMTGK(1)AGTFHTK(1)EAMAYGTK	1.7391	598620	550530	537850	59486	60784	81848	121720	125300	109610	354800	383190	387950	186120	188000	197210	194030	205760	200630	2.61509	2.36051	2.26124	0.237023	0.244324	0.327568	0.493487	0.513838	0.446576	1.44288	1.58008	1.64486	0.763062	0.757025	0.818878	0.639897	0.690444	0.670339
LmxM.25.2140	40	K	4.2563	4.20689e-08	Up	succinyl-CoA synthetase alpha subunit, putative OS=Leishmania_mexicana_MHOM/GT/2001/U1103 GN=LmxM.25.2140	LmxM.25.2140	1	2.74707e-106	205.37	2	EAMAYGTK(1)VVGGVSPK	0.62199	1705100	1709900	1777800	478140	391160	428780	463010	394460	434180	1411800	1436000	1461100	451530	425480	491180	373720	463120	436510	2.2971	2.26095	2.30495	0.587522	0.484871	0.529203	0.578893	0.498853	0.545519	1.77058	1.82605	1.91041	0.570884	0.528355	0.628963	0.380086	0.479242	0.449767
LmxM.25.2140	25	K	1.96305	0.00338238	Up	succinyl-CoA synthetase alpha subunit, putative OS=Leishmania_mexicana_MHOM/GT/2001/U1103 GN=LmxM.25.2140	LmxM.25.2140	1	5.38692e-80	211.15	3	VIVQGMTGK(1)AGTFHTK(1)EAMAYGTK	1.7391	1069200	1059600	1079300	408950	400690	415810	736150	738750	758980	816600	841690	837670	653180	639800	631330	785690	808980	849980	1.56821	1.52538	1.52348	0.547087	0.540751	0.558727	1.00205	1.01715	1.03821	1.11498	1.16527	1.19244	0.899106	0.864983	0.880153	0.869969	0.911416	0.953496
LmxM.25.2140	48	K	2.44267	0.000497219	Up	succinyl-CoA synthetase alpha subunit, putative OS=Leishmania_mexicana_MHOM/GT/2001/U1103 GN=LmxM.25.2140	LmxM.25.2140	1	0.00600508	52.591	2	VVGGVSPK(1)K	1.161	294710	268780	266960	0	0	0	120700	117750	0	187990	0	61271	0	109830	0	110650	0	121360	1.95764	1.75237	1.70661				0.744089	0.734243		1.16248		0.395014		0.672476		0.554877		0.616564
LmxM.25.2140	151	K	6.4949	1.03265e-05	Up	succinyl-CoA synthetase alpha subunit, putative OS=Leishmania_mexicana_MHOM/GT/2001/U1103 GN=LmxM.25.2140	LmxM.25.2140	1	9.43481e-30	173.28	3	IGIMPGHIHK(1)R	-0.73355	282040	593880	555920	76284	68874	69882	82968	77464	90498	297320	288460	277960	57705	60763	60785	81110	94113	103100	1.73897	3.59394	3.29871	0.428998	0.390733	0.394735	0.474756	0.448355	0.520393	1.70655	1.67879	1.66334	0.333908	0.345333	0.356232	0.377539	0.445722	0.486188
LmxM.25.2140	236	K	20.9676	3.00602e-07	Up	succinyl-CoA synthetase alpha subunit, putative OS=Leishmania_mexicana_MHOM/GT/2001/U1103 GN=LmxM.25.2140	LmxM.25.2140	1	3.13843e-67	146.34	2	K(1)PIVSFIGGATAPPGR	0.61675	699020	706470	760810	45054	43200	44834	30912	29536	26083	635700	673060	674470	61338	59961	60598	51365	53944	52508	2.94641	2.92272	3.08624	0.173212	0.167544	0.173129	0.120923	0.116868	0.102535	2.49441	2.67786	2.75921	0.242641	0.232964	0.242782	0.163447	0.174654	0.169275
LmxM.25.2140	123	K	6.54291	4.62816e-10	Up	succinyl-CoA synthetase alpha subunit, putative OS=Leishmania_mexicana_MHOM/GT/2001/U1103 GN=LmxM.25.2140	LmxM.25.2140	1	1.06096e-42	181.87	2	VK(1)SMLLSQNK(1)TR	-4.6096	1867600	1754900	1756100	273510	279270	298170	303330	280350	310640	1188000	1187800	1206000	236900	229860	241810	215860	206080	214280	3.0761	2.837	2.78365	0.410893	0.423236	0.449923	0.463671	0.433468	0.477182	1.82157	1.84667	1.92789	0.366195	0.348977	0.378569	0.268407	0.260726	0.269936
LmxM.25.2140	115	K	9.5604	1.07533e-11	Up	succinyl-CoA synthetase alpha subunit, putative OS=Leishmania_mexicana_MHOM/GT/2001/U1103 GN=LmxM.25.2140	LmxM.25.2140	1	2.44394e-59	220.87	2	VK(1)SMLLSQNK(1)TR	-4.6096	9591000	9319500	9416200	1100100	1083900	1107900	990390	997180	1013000	6700700	6515700	6664100	912710	938910	933740	811990	831880	885010	3.1826	3.03529	3.00706	0.332958	0.33094	0.336803	0.305002	0.310621	0.3135	2.0699	2.04084	2.14623	0.284238	0.287183	0.294509	0.203411	0.212036	0.22461
LmxM.25.2340	43	K	4.63971	0.0244482	Up	AGC essential kinase 1 OS=Leishmania_mexicana_MHOM/GT/2001/U1103 GN=LmxM.25.2340	LmxM.25.2340	1	1.72632e-22	106.97	2	LTK(1)DDFETLDVLGK	1.2423	124530	116460	122670	0	0	3419.9	32136	27728	28887	60362	88974	0	43977	47800	0	32835	0	23866	2.02062	1.91513	2.00497			0.0831682	0.584459	0.508559	0.531025	1.04814	1.584		0.697506	0.764035		0.440807		0.331052
LmxM.25.2420	29	K	7.09621	2.70636e-05	Up	hypothetical protein, conserved OS=Leishmania_mexicana_MHOM/GT/2001/U1103 GN=LmxM.25.2420	LmxM.25.2420	1	0.000735113	100.84	2	ILK(1)IDHPFR	-1.442	207320	188480	0	36469	38637	39405	30791	0	0	108390	128760	114560	35908	0	0	0	0	0	2.62374	2.16135		0.322979	0.360022	0.36448	0.30115			1.13676	1.31674	1.17747	0.394969
LmxM.26.0010	165	K	16.5145	2.36676e-07	Up	brix domain containing-like protein OS=Leishmania_mexicana_MHOM/GT/2001/U1103 GN=LmxM.26.0010	LmxM.26.0010	1	1.24936e-18	192.6	2	LK(1)NLLVDYFR	-2.272	645310	1114500	707710	52208	53028	49838	33276	30695	31401	435870	498610	445530	33149	27755	32978	16457	18724	18228	2.26435	4.05366	2.57173	0.196379	0.214429	0.193846	0.160095	0.153438	0.158412	1.45863	1.68698	1.59415	0.148573	0.129347	0.148408	0.0985366	0.119558	0.103344
LmxM.26.0140	138	K	3.5529	2.43868e-09	Up	adenine phosphoribosyltransferase OS=Leishmania_mexicana_MHOM/GT/2001/U1103 GN=LmxM.26.0140	LmxM.26.0140	1	0.000730196	86.205	2	YGSIGK(1)GSR	0.05829	336530	336260	332850	88363	80293	85668	80079	83725	83738	205110	201390	200400	86862	83909	86662	0	0	25251	1.94554	1.87365	1.87731	0.593054	0.52041	0.529595	0.506299	0.522718	0.534598	1.41621	1.42508	1.37238	0.518904	0.520089	0.531939			0.260518
LmxM.26.0170	203	K	4.01965	5.96228e-05	Up	60S ribosomal protein L7, putative OS=Leishmania_mexicana_MHOM/GT/2001/U1103 GN=LmxM.26.0170	LmxM.26.0170	1	2.89384e-81	141.09	3	YNNADIVCAEDMVNQIYTCGK(1)HFR	-1.4964	147980	201770	170030	45686	30827	0	47849	52661	44682	0	0	0	0	12299	0	0	0	0	1.70866	2.37601	1.99683	0.485884	0.355162		0.547811	0.610607	0.522103					0.147443
LmxM.26.0170	111	K	8.33789	0.00104428	Up	60S ribosomal protein L7, putative OS=Leishmania_mexicana_MHOM/GT/2001/U1103 GN=LmxM.26.0170	LmxM.26.0170	1	0.00399792	88.35	2	K(1)ILQLLR	0.85113	97058	79581	73900	9015.4	11982	0	0	0	0	51061	57255	49981	8914.9	0	0	0	0	0	1.92537	1.61002	1.49105	0.164728	0.237168					0.978756	1.10327	0.992831	0.177078
LmxM.26.0170	92	K	18.1422	3.92246e-05	Up	60S ribosomal protein L7, putative OS=Leishmania_mexicana_MHOM/GT/2001/U1103 GN=LmxM.26.0170	LmxM.26.0170	1	1.55751e-11	122.44	2	PK(1)VVVVTR	1.1008	2026000	1199900	1194200	130760	138950	133930	37735	36692	32019	714030	736610	729040	127530	122340	130430	45331	49775	55371	4.61571	2.78794	2.76719	0.274392	0.315864	0.28797	0.0852412	0.0839443	0.0738208	1.57187	1.63013	1.66317	0.290921	0.289382	0.315512	0.127569	0.147502	0.166321
LmxM.26.0240	96	K	2.54633	1.06377e-05	Up	Eukaryotic translation initiation factor 4E type 6, putative OS=Leishmania_mexicana_MHOM/GT/2001/U1103 GN=LmxM.26.0240	LmxM.26.0240	1	0.00103262	102.46	2	FSIFCK(1)TK	-2.8412	194380	176030	178530	0	110960	110530	0	119990	124860	176040	168480	167060	106740	103450	107500	47333	46073	54163	2.32396	2.10643	1.97101		0.894205	0.847893		0.776526	0.833334	1.37376	1.39052	1.29901	0.880577	0.876232	0.947381	0.346735	0.351977	0.407812
LmxM.26.0380	42	K	9.45896	0.0427595	Up	Regulator of Vps4 activity in the MVB pathway, putative OS=Leishmania_mexicana_MHOM/GT/2001/U1103 GN=LmxM.26.0380	LmxM.26.0380	1	0.000522578	103.8	2	LVNSVK(1)TQR	0.18225	213000	219360	211410	0	0	0	24606	0	20136	129670	131940	132110	0	0	0	0	0	0	1.43095	1.46503	1.37375				0.174534		0.126396	1.02282	0.93869	0.957614
LmxM.26.0620	31	K	12.226	1.25395e-08	Up	10 kDa heat shock protein, putative OS=Leishmania_mexicana_MHOM/GT/2001/U1103 GN=LmxM.26.0620	LmxM.26.0620	1	1.51406e-187	313.83	2	VEAAK(1)QTK(1)AGILIPEQVAAK	-0.26259	3426600	3505500	3556400	218400	222350	217730	294710	281530	297090	3188000	3110500	3134900	473830	442180	453790	444760	461730	485010	2.41073	2.49061	2.76492	0.181732	0.194103	0.17958	0.236454	0.21747	0.244753	2.30704	2.21589	2.34245	0.39339	0.364572	0.378649	0.257221	0.278005	0.292932
LmxM.26.0620	57	K	2.93278	0.0149033	Up	10 kDa heat shock protein, putative OS=Leishmania_mexicana_MHOM/GT/2001/U1103 GN=LmxM.26.0620	LmxM.26.0620	1	5.5023e-109	204.42	2	VNEGTVVAVAAGSK(1)DWTPTVK	-3.5345	427080	427970	415830	68192	75446	0	243070	0	126470	371560	398850	387440	87255	82126	80472	59910	72417	66821	1.90727	1.93013	2.05212	0.360188	0.418068		1.23794		0.661367	1.7068	1.80361	1.83767	0.45984	0.429814	0.426229	0.219936	0.276771	0.25618
LmxM.26.0660	52	K	6.09783	2.51647e-06	Up	protein disulfide isomerase, putative OS=Leishmania_mexicana_MHOM/GT/2001/U1103 GN=LmxM.26.0660	LmxM.26.0660	1	1.1501e-23	111.98	2	DK(1)AALVEFYAPWCGHCK	0.054786	230720	228990	232730	0	33973	31960	0	0	41506	116980	142940	135080	29156	20558	24882	23751	27742	22437	2.54698	2.53531	2.52713		0.417736	0.382114			0.44804	1.30352	1.61581	1.50556	0.365056	0.265954	0.317404	0.228656	0.270282	0.218473
LmxM.26.0660	376	K	9.85366	3.9352e-08	Up	protein disulfide isomerase, putative OS=Leishmania_mexicana_MHOM/GT/2001/U1103 GN=LmxM.26.0660	LmxM.26.0660	1	1.40192e-10	135.28	2	LNILTSIQK(1)HVK	0.38835	756740	710320	591940	73841	71035	66103	62520	63019	64271	404120	502210	425180	96829	81204	89560	58119	61972	69977	3.16952	2.98383	2.4387	0.334894	0.331395	0.299856	0.256936	0.257625	0.263225	1.70852	2.15391	1.79798	0.459983	0.398573	0.433458	0.212288	0.229076	0.258519
LmxM.26.0660	208	K	4.44813	2.93809e-05	Up	protein disulfide isomerase, putative OS=Leishmania_mexicana_MHOM/GT/2001/U1103 GN=LmxM.26.0660	LmxM.26.0660	1	4.11752e-15	108.4	2	VFSNDK(1)DVVIAR	-1.1871	151250	147070	154130	0	0	34238	32107	36168	31815	103580	104110	104800	0	27137	0	0	32837	0	1.8707	1.82435	1.87513			0.458631	0.389645	0.43662	0.384775	1.29315	1.31856	1.30869		0.393329			0.358436
LmxM.26.0830	178	K	7.88529	1.3955e-05	Up	aspartate--ammonia ligase, putative OS=Leishmania_mexicana_MHOM/GT/2001/U1103 GN=LmxM.26.0830	LmxM.26.0830	1	1.06526e-18	167.04	3	FVHTEQLLK(1)R	-0.82294	86603	78884	64892	13655	13641	10596	7954.7	7633.7	0	40251	44247	47770	7223.8	8051.5	11365	0	0	0	2.93509	2.65746	2.18643	0.418508	0.411712	0.310602	0.257282	0.246093		1.14379	1.28346	1.37443	0.227219	0.247417	0.352508
LmxM.26.0880	29	K	3.46631	8.80443e-08	Up	40S ribosomal protein S16, putative OS=Leishmania_mexicana_MHOM/GT/2001/U1103 GN=LmxM.26.0880	LmxM.26.0880	1	1.0988e-121	236.34	2	TAIAVATVTK(1)AAQCNIK	-1.5213	3074300	2639800	2671500	409570	394020	402380	490290	495110	513790	2391300	2550700	2340800	699940	592320	651920	323360	321950	372170	2.03583	1.71161	1.73613	0.566741	0.555107	0.557949	0.48864	0.487871	0.507621	1.47183	1.53874	1.40626	0.580983	0.502331	0.575623	0.316596	0.303182	0.367248
LmxM.26.0880	5	K	10.1272	2.44631e-09	Up	40S ribosomal protein S16, putative OS=Leishmania_mexicana_MHOM/GT/2001/U1103 GN=LmxM.26.0880	LmxM.26.0880	1	0.000266335	107.08	2	PADK(1)SYALK(1)QVQTFGK	1.3293	2293800	2073500	2106400	108220	101040	0	135290	132150	141070	1587800	1545800	1527500	248670	251340	247570	116860	122870	129940	2.37822	2.10493	2.14324	0.234458	0.222871		0.211107	0.203878	0.218218	1.5301	1.46002	1.43676	0.323167	0.333731	0.34225	0.179137	0.18116	0.200753
LmxM.26.0880	17	K	3.6137	0.0151108	Up	40S ribosomal protein S16, putative OS=Leishmania_mexicana_MHOM/GT/2001/U1103 GN=LmxM.26.0880	LmxM.26.0880	1	0.00161294	118.06	2	QVQTFGK(1)K	-1.3315	547220	501760	0	0	61220	75044	0	0	0	393000	392120	389160	93504	87479	95432	0	0	0	1.62947	1.46291			0.38783	0.467911				1.08769	1.06369	1.05128	0.348997	0.3336	0.378902
LmxM.26.0880	93	K	3.24263	1.92e-06	Up	40S ribosomal protein S16, putative OS=Leishmania_mexicana_MHOM/GT/2001/U1103 GN=LmxM.26.0880	LmxM.26.0880	1	6.66803e-45	178.95	2	QAIAK(1)GLVAFFQK	-0.98859	176780	178960	173680	28172	21722	29195	38108	29362	36851	173910	175060	175050	39782	37457	43284	30735	27693	33161	1.72373	1.70856	1.66195	0.574003	0.450607	0.596083	0.559232	0.426019	0.536097	1.57612	1.55501	1.54847	0.486216	0.467742	0.562745	0.44309	0.383995	0.481821
LmxM.26.1010	373	K	3.86076	0.000517239	Up	hypothetical protein, conserved OS=Leishmania_mexicana_MHOM/GT/2001/U1103 GN=LmxM.26.1010	LmxM.26.1010	1	3.25207e-32	112.68	2	TLQDTK(1)VTGTPLSTSER	-4.2634	120500	116950	114240	42747	33747	0	0	0	0	105680	148150	132370	0	0	0	0	0	0	1.30665	1.28011	1.18477	0.358113	0.293146					1.02028	1.44634	1.32406
LmxM.26.1100	57	K	3.85167	3.48518e-05	Up	hypothetical protein, conserved OS=Leishmania_mexicana_MHOM/GT/2001/U1103 GN=LmxM.26.1100	LmxM.26.1100	1	2.69937e-05	112.8	2	FIDLK(1)WMMNR	2.2111	157400	155230	135730	46668	46335	49062	0	0	0	69789	78958	73032	32188	26177	27156	22330	23121	23505	2.7561	2.86247	2.33351	0.717846	0.671183	0.675548				1.26714	1.42669	1.35854	0.499942	0.44242	0.454296	0.28512	0.313053	0.311461
LmxM.26.1240	88	K	3.58383	9.45599e-06	Up	heat shock protein 70-related protein OS=Leishmania_mexicana_MHOM/GT/2001/U1103 GN=LmxM.26.1240	LmxM.26.1240	1	1.93539e-55	166.48	2	FDDPDLQSDMK(1)HWPFK	1.5722	621980	618490	587790	0	0	148460	0	0	151540	410520	425620	394920	167990	151750	166690	47814	0	0	1.77958	1.78346	1.70232			0.494213			0.485252	1.18599	1.21151	1.11639	0.546294	0.493063	0.541725	0.141323
LmxM.26.1240	71	K	15.7723	5.69971e-12	Up	heat shock protein 70-related protein OS=Leishmania_mexicana_MHOM/GT/2001/U1103 GN=LmxM.26.1240	LmxM.26.1240	1	2.82059e-81	178.51	2	NQVAMNPSNTVFDAK(1)R	-0.31071	553060	566600	564370	30573	29733	30808	33079	29373	33074	388200	403490	403110	36498	34693	36192	21681	25408	27545	2.84581	2.93832	2.9395	0.18965	0.188663	0.184442	0.186248	0.166729	0.190466	2.01694	2.06552	2.04937	0.213454	0.202725	0.211531	0.115246	0.138026	0.148802
LmxM.26.1380	86	K	43.0176	8.67847e-13	Up	prefoldin-like protein OS=Leishmania_mexicana_MHOM/GT/2001/U1103 GN=LmxM.26.1380	LmxM.26.1380	1	2.00936e-20	163.43	2	TLQTLEYLK(1)K	-0.99095	2482100	2284800	2217700	52920	48400	49694	47251	47917	46587	1736900	1790000	1685900	55505	51459	51130	44016	0	45961	3.10173	2.95571	2.71372	0.072158	0.0684174	0.0677123	0.0664021	0.0671895	0.0659149	2.24236	2.36345	2.14574	0.0754874	0.0730282	0.0725709	0.056297		0.0594641
LmxM.26.1380	11	K	19.0966	4.79761e-06	Up	prefoldin-like protein OS=Leishmania_mexicana_MHOM/GT/2001/U1103 GN=LmxM.26.1380	LmxM.26.1380	1	8.5092e-12	164.31	2	YTFK(1)DDYVSPR	1.33	493930	508170	528210	27840	0	26307	0	20691	22125	329590	342940	345490	29257	26315	27060	0	0	0	2.20405	2.34744	2.30802	0.135552		0.127999		0.103601	0.111783	1.51941	1.6169	1.57019	0.142084	0.133353	0.137147
LmxM.26.1550	187	K	1.81099	0.00565158	Up	trifunctional enzyme alpha subunit, mitochondrial precursor-like protein OS=Leishmania_mexicana_MHOM/GT/2001/U1103 GN=LmxM.26.1550	LmxM.26.1550	1	1.96373e-05	92.707	2	K(1)WAGQYLSDKPAR	0.033917	73503	47476	51709	24243	0	21449	34430	0	37935	41277	47951	45284	33963	34066	34488	0	26918	34665	1.88296	1.22487	1.36412	0.80866		0.712645	0.851433		0.919705	1.16574	1.32627	1.26521	0.892004	0.898643	0.905309		0.513414	0.656422
LmxM.26.1570	544	K	1.98481	0.00947593	Up	thimet oligopeptidase, putative OS=Leishmania_mexicana_MHOM/GT/2001/U1103 GN=LmxM.26.1570	LmxM.26.1570	1	0.000112174	102.55	2	VASK(1)NAFSGR	-0.086335	278390	0	251920	0	146410	146910	0	109850	0	217410	216930	0	117020	118160	0	89923	86033	88112	1.90155		1.75138		1.00333	0.989321		0.768023		1.44643	1.42807		0.808205	0.815587		0.443669	0.423404	0.435683
LmxM.26.1610	461	K	4.61556	0.00929474	Up	Proline dehydrogenase, mitochondrial OS=Leishmania_mexicana_MHOM/GT/2001/U1103 GN=LmxM.26.1610	LmxM.26.1610	1	4.18145e-06	94.791	2	K(1)HEVFFGTHNK	3.1942	61376	35978	36750	0	17890	25422	0	0	0	26856	37137	28815	0	0	0	0	0	0	2.29813	1.38491	1.39948		0.302789	0.431325				0.796344	1.14321	0.886547
LmxM.26.1610	242	K	4.21784	6.63802e-07	Up	Proline dehydrogenase, mitochondrial OS=Leishmania_mexicana_MHOM/GT/2001/U1103 GN=LmxM.26.1610	LmxM.26.1610	1	1.55852e-13	103.69	2	K(1)HQLFITYDQLR	-0.79373	58971	66782	68423	34851	34735	37858	0	21018	17033	55413	66165	0	39396	25044	0	0	0	0	1.70255	1.98212	2.00908	0.454266	0.453298	0.495267		0.461303	0.385735	1.26694	1.57048		0.999853	0.642212
LmxM.26.1710	72	K	14.6466	5.4909e-07	Up	cytochrome c oxidase subunit V, putative OS=Leishmania_mexicana_MHOM/GT/2001/U1103 GN=LmxM.26.1710	LmxM.26.1710	1	4.27956e-10	110.58	2	LGEVSK(1)ENK(1)TFIR	-1.5556	2969100	2621300	2690300	239670	0	0	218490	217860	217540	1576800	1626200	1634000	0	292760	0	0	0	0	2.48038	2.10704	2.293	0.187303			0.147652	0.148725	0.14267	1.38115	1.38327	1.38772		0.233851
LmxM.26.1960	269	K	4.7894	6.36958e-06	Up	hypothetical protein, conserved OS=Leishmania_mexicana_MHOM/GT/2001/U1103 GN=LmxM.26.1960	LmxM.26.1960	1	6.50081e-213	223.38	2	LLVAAK(1)SADPSNVSILDQSLR	-0.71365	968120	1343000	1397300	0	257960	251990	245440	259170	242780	513040	747860	655230	293080	207470	270450	175070	153060	141780	1.89546	2.59016	2.73741		0.576539	0.54711	0.457	0.483334	0.449566	1.13511	1.73717	1.49865	0.599404	0.429686	0.563522	0.399417	0.34975	0.32384
LmxM.26.1960	366	K	7.14818	2.9303e-06	Up	hypothetical protein, conserved OS=Leishmania_mexicana_MHOM/GT/2001/U1103 GN=LmxM.26.1960	LmxM.26.1960	1	7.84586e-24	146.58	2	PIMPLDAYPTNTVFYK(1)R	0.61597	1037600	900270	888360	144150	154300	143290	101970	94993	108510	505940	437850	425630	171030	197150	180450	96379	0	98206	2.90207	2.48037	2.48618	0.453158	0.492646	0.444427	0.271229	0.253074	0.28704	1.59911	1.45291	1.3907	0.499687	0.583291	0.537123	0.314116		0.32044
LmxM.26.1960	144	K	3.30618	2.62377e-07	Up	hypothetical protein, conserved OS=Leishmania_mexicana_MHOM/GT/2001/U1103 GN=LmxM.26.1960	LmxM.26.1960	1	2.3159e-87	204.33	2	QMATGDK(1)VTESLENLDNAR	1.5487	222020	233210	188180	55966	51926	53140	70506	69939	76550	113070	139550	110070	37567	47859	46010	0	0	0	2.05566	2.12702	1.7434	0.582425	0.548827	0.545616	0.620828	0.616817	0.670347	1.18306	1.53294	1.19056	0.36334	0.468741	0.453367
LmxM.26.2000	70	K	3.94828	1.65976e-07	Up	methyltransferase domain containing protein, putative OS=Leishmania_mexicana_MHOM/GT/2001/U1103 GN=LmxM.26.2000	LmxM.26.2000	1	2.84364e-76	172.73	3	AGNDAALSESHSK(1)SSDIYESEASAR	0.84297	187510	186810	185610	70406	59126	63410	54117	50685	51573	122730	141190	136410	37556	45285	42855	5424	0	0	2.27872	2.29728	2.3012	0.694256	0.587596	0.618114	0.530365	0.520228	0.533082	1.42511	1.70132	1.67894	0.437041	0.527055	0.478881	0.0589966
LmxM.26.2000	234	K	5.46429	1.13622e-09	Up	methyltransferase domain containing protein, putative OS=Leishmania_mexicana_MHOM/GT/2001/U1103 GN=LmxM.26.2000	LmxM.26.2000	1	4.73735e-05	85.716	2	LYPDVK(1)YWQAK	1.4869	314210	307080	340940	74509	79109	74092	67782	69726	68090	262540	270930	262510	0	0	87449	0	0	0	1.9613	1.93965	2.17115	0.377378	0.403816	0.370971	0.341204	0.367593	0.361504	1.56586	1.67686	1.65956			0.501925
LmxM.26.2280	111	K	13.2257	0.0157433	Up	nitrilase, putative OS=Leishmania_mexicana_MHOM/GT/2001/U1103 GN=LmxM.26.2280	LmxM.26.2280	1	1.00288e-48	146.37	3	LFNSSMTFGSDGALK(1)HVHR	2.9937	263190	0	226120	0	0	17911	16539	0	0	103820	103460	101830	0	0	13103	0	0	24221	3.09098		2.64116			0.213528	0.21988			1.49709	1.4425	1.38394			0.154897			0.137929
LmxM.26.2550	6	K	9.50869	5.18423e-07	Up	hypothetical protein, conserved OS=Leishmania_mexicana_MHOM/GT/2001/U1103 GN=LmxM.26.2550	LmxM.26.2550	1	2.90472e-05	106.35	2	VTTVK(1)VEIPR	-3.7238	641840	561780	560360	0	35922	0	74507	76973	71902	291140	315450	320330	71536	0	82688	67976	71946	76445	2.64647	2.33618	2.92868		0.249763		0.295027	0.280894	0.283663	1.18368	1.33182	1.32431	0.26097		0.272082	0.66321	0.389026	0.334456
LmxM.26.2700	224	K	7.25655	2.26773e-05	Up	6-phosphogluconolactonase OS=Leishmania_mexicana_MHOM/GT/2001/U1103 GN=LmxM.26.2700	LmxM.26.2700	1	0.00216656	126.2	2	DK(1)NWVVR	0.4165	221340	222570	225440	0	0	0	27800	27303	0	145140	145990	146910	0	21464	21498	15552	17043	18537	1.9993	2.24346	2.12821				0.291462	0.293846		1.60006	1.65144	1.64402		0.226335	0.224219	0.123852	0.137158	0.146491
LmxM.26.2700	213	K	21.7147	8.91211e-09	Up	6-phosphogluconolactonase OS=Leishmania_mexicana_MHOM/GT/2001/U1103 GN=LmxM.26.2700	LmxM.26.2700	1	5.80134e-43	148.69	3	TVIQHAK(1)HVVVLACGK	0.44801	829960	780350	680760	26872	29360	23270	28756	25897	28303	374310	347890	352560	33834	42637	43321	35596	39144	40102	3.46635	3.63695	2.97148	0.174783	0.191084	0.154548	0.1394	0.128871	0.139238	1.90799	1.81961	1.82426	0.165625	0.207886	0.208915	0.131073	0.145659	0.146532
LmxM.26.2700	206	K	14.9024	6.76801e-09	Up	6-phosphogluconolactonase OS=Leishmania_mexicana_MHOM/GT/2001/U1103 GN=LmxM.26.2700	LmxM.26.2700	1	1.3827e-26	195.4	2	VTLSK(1)TVIQHAK	-0.90474	1268100	944250	943770	52603	51966	51256	57331	57093	55183	430710	440210	430220	75007	73488	70798	75550	77086	84809	3.80373	3.16065	2.9586	0.245725	0.2429	0.244485	0.199601	0.204047	0.194971	1.57678	1.65362	1.59876	0.263704	0.257333	0.245207	0.199797	0.20601	0.222562
LmxM.27.0130	74	K	7.00356	0.0013564	Up	WW domain/Zinc finger C-x8-C-x5-C-x3-H type (and similar), putative OS=Leishmania_mexicana_MHOM/GT/2001/U1103 GN=LmxM.27.0130	LmxM.27.0130	1	0.000669872	110.88	2	SK(1)MCIYWEK	1.6531	430290	444890	455680	47486	49493	0	47753	0	49110	366850	372500	367440	50566	0	47537	0	35151	34166	1.53983	1.71967	2.05837	0.24426	0.357266				0.157782	1.66044	1.62985	1.95455	0.317604		0.429058		0.201714	0.156602
LmxM.27.0160	70	K	6.97322	1.64263e-05	Up	SET domain containing protein, putative OS=Leishmania_mexicana_MHOM/GT/2001/U1103 GN=LmxM.27.0160	LmxM.27.0160	1	2.32794e-23	115.04	2	VVYGTPQEQQYVK(1)HR	-2.8869	289010	235230	242550	33131	0	0	29124	27874	0	98590	100220	109220	0	0	0	16273	23275	0	2.28991	1.85758	1.98813	0.323016			0.280405	0.276462		0.910972	0.909218	1.0119				0.135256	0.192178
LmxM.27.0210	18	K	3.08149	0.0267332	Up	Vacuolar iron transporter 1, putative OS=Leishmania_mexicana_MHOM/GT/2001/U1103 GN=LmxM.27.0210	LmxM.27.0210	1	0.00133152	60.892	2	EYK(1)SCDAAR	1.6549	0	58434	59232	0	13359	0	0	0	15090	35633	36482	37039	0	17462	17494	0	0	0		1.42364	1.46731		0.498393				0.439775	1.35371	1.43076	1.46949		0.627266	0.620625
LmxM.27.0290	83	K	7.10539	0.000756974	Up	acyl carrier protein, mitochondrial, putative OS=Leishmania_mexicana_MHOM/GT/2001/U1103 GN=LmxM.27.0290	LmxM.27.0290	1	6.91991e-06	114.39	2	VLEVVK(1)NFEK	-2.8071	900130	817750	818790	0	81321	81150	156620	0	0	469280	482170	465820	0	0	0	137420	130790	155330	2.06134	1.95994	1.96159		0.213673	0.216554	0.41179			1.39211	1.43354	1.56883				0.298724	0.269951	0.327103
LmxM.27.0420	54	K	2.49241	2.65101e-06	Up	ribokinase, putative OS=Leishmania_mexicana_MHOM/GT/2001/U1103 GN=LmxM.27.0420	LmxM.27.0420	1	1.19676e-15	132.44	2	GFGGK(1)GANQAVAAGR	0.17466	138640	143230	138080	73494	60634	63712	43952	43648	54362	82221	72907	87104	41081	44203	40064	28359	27264	35348	1.75625	1.72827	1.77236	0.792891	0.649486	0.678409	0.625355	0.655413	0.816764	1.48378	1.41588	1.71462	0.733941	0.789989	0.746017	0.473032	0.489048	0.629609
LmxM.27.0420	103	K	3.21148	6.13247e-05	Up	ribokinase, putative OS=Leishmania_mexicana_MHOM/GT/2001/U1103 GN=LmxM.27.0420	LmxM.27.0420	1	1.72309e-93	201.65	2	TGK(1)SSTGLAMILVDTK	-0.018617	795630	771150	743780	360350	344920	323540	156280	146150	171160	445090	543790	500040	267600	244350	244450	149130	159720	156150	1.88234	1.73782	1.78302	0.726065	0.690019	0.64341	0.415279	0.409863	0.480278	1.50012	1.97233	1.83833	0.892885	0.815588	0.850107	0.464573	0.53507	0.519442
LmxM.27.0745	85	K	12.6856	0.0321689	Up	hypothetical protein, conserved (pseudogene) OS=Leishmania_mexicana_MHOM/GT/2001/U1103 GN=LmxM.27.0745	LmxM.27.0745	1	2.10446e-33	138	2	TYAEHPAHK(1)ALQVR	-2.38	203310	210480	223780	0	15109	19003	0	0	0	92613	106690	96702	12588	10031	9877.7	56522	55750	56506	4.10446	4.4307	4.54505		0.290844	0.396563				2.31572	2.97413	2.64362	0.288246	0.245675	0.224739	0.252648	0.22982	0.240871
LmxM.27.0760	122	K	2.77904	0.000235051	Up	ras-related protein RAB1A, putative OS=Leishmania_mexicana_MHOM/GT/2001/U1103 GN=LmxM.27.0760	LmxM.27.0760	1	5.39524e-06	79.889	2	ILVGNK(1)CDLVTK	1.8104	155450	144770	0	0	39705	0	40604	0	40664	0	0	119430	0	57256	60971	0	71206	88815	1.58212	1.40537			0.548064		0.543365		0.521087			1.62904		0.845421	0.881087		0.716954	0.885495
LmxM.27.0760	21	K	3.01819	6.03316e-06	Up	ras-related protein RAB1A, putative OS=Leishmania_mexicana_MHOM/GT/2001/U1103 GN=LmxM.27.0760	LmxM.27.0760	1	2.75694e-68	151.52	2	LLLIGDSGVGK(1)SCLLLR	0.44159	317000	387430	399530	78078	74887	77413	102720	110440	102330	41984	45931	34113	27319	46061	0	63560	67243	40830	2.22687	2.59593	2.79708	0.765094	0.713475	0.746325	0.948778	0.970541	0.905087	0.385261	0.429026	0.321162	0.272093	0.469431		0.43842	0.467314	0.280974
LmxM.27.0810	46	K	18.6891	1.02737e-08	Up	glutaredoxin-like protein OS=Leishmania_mexicana_MHOM/GT/2001/U1103 GN=LmxM.27.0810	LmxM.27.0810	1	0.000130504	99.174	2	EILK(1)SLVK	-0.27942	771800	730620	693670	0	34040	35900	39113	46244	45780	285490	279690	280070	69730	65585	73757	94545	102860	115630	3.95644	3.82039	3.49888		0.203897	0.221516	0.168267	0.20049	0.211381	1.9537	1.98042	1.76554	0.339146	0.327799	0.378284	0.23081	0.264297	0.297354
LmxM.27.0810	26	K	16.6229	1.27214e-10	Up	glutaredoxin-like protein OS=Leishmania_mexicana_MHOM/GT/2001/U1103 GN=LmxM.27.0810	LmxM.27.0810	1	6.47231e-107	193.62	2	NK(1)VVVFSWVHCPYCSR	-1.1721	2239100	2140600	2335700	109660	110890	0	163580	150810	160310	1499500	1547700	1488600	114290	103800	127440	117110	149350	169480	3.39489	3.31058	3.48455	0.204773	0.196456		0.208142	0.193384	0.218929	3.03505	3.2413	2.7755	0.16441	0.153445	0.193318	0.0845596	0.113502	0.128906
LmxM.27.0880	842	K	5.91062	3.72558e-06	Up	2-oxoglutarate dehydrogenase subunit, putative OS=Leishmania_mexicana_MHOM/GT/2001/U1103 GN=LmxM.27.0880	LmxM.27.0880	1	2.51877e-05	117.3	2	PLINFFSK(1)AR	1.811	275800	284710	295470	59058	0	59712	0	0	0	160220	176200	171040	0	0	41706	0	25871	27014	2.1757	2.21915	2.2937	0.380863		0.373547				1.16262	1.24067	1.1834			0.297285		0.178403	0.184446
LmxM.27.0880	294	K	6.92681	3.09422e-05	Up	2-oxoglutarate dehydrogenase subunit, putative OS=Leishmania_mexicana_MHOM/GT/2001/U1103 GN=LmxM.27.0880	LmxM.27.0880	1	7.83207e-69	232.17	2	LNVLANVLHK(1)SLR	3.417	745160	788560	800910	117950	83915	90578	163730	158700	180040	517570	686540	599330	193340	213140	226870	233180	201010	157290	2.46311	2.57543	2.60517	0.318726	0.228245	0.23743	0.45989	0.452788	0.509915	1.5737	2.02557	1.73753	0.577075	0.63272	0.677612	0.670481	0.580814	0.449999
LmxM.27.0880	972	K	7.71246	0.0293006	Up	2-oxoglutarate dehydrogenase subunit, putative OS=Leishmania_mexicana_MHOM/GT/2001/U1103 GN=LmxM.27.0880	LmxM.27.0880	1	5.98143e-06	74.524	3	MNSLMHHLGLQQK(1)R	0.64469	64105	0	60298	0	0	11447	8152.8	0	0	47652	46181	44062	0	13054	0	0	0	0	1.96616		1.81991			0.278418	0.212484			1.34439	1.26426	1.18528		0.35957
LmxM.27.1060	210	K	5.14667	0.000639116	Up	cysteine desulfurase, putative OS=Leishmania_mexicana_MHOM/GT/2001/U1103 GN=LmxM.27.1060	LmxM.27.1060	1	2.43933e-05	99.855	2	EIGALCHSK(1)K	1.4825	88109	112390	115300	0	19530	19292	0	0	0	60097	0	68633	16256	0	0	0	0	0	1.34164	1.73475	1.71272		0.31496	0.30539				1.07101		1.22443	0.275886
LmxM.27.1060	332	K	3.57564	3.20341e-06	Up	cysteine desulfurase, putative OS=Leishmania_mexicana_MHOM/GT/2001/U1103 GN=LmxM.27.1060	LmxM.27.1060	1	9.13679e-36	145.95	3	LSHLVVNGDLK(1)HR	-0.76143	39203	42639	40548	0	0	0	11301	10646	11027	23441	23659	23099	14912	20301	16980	7515.5	0	5294.9	1.7962	1.98033	1.81238				0.534621	0.507986	0.520443	1.25701	1.30413	1.23999	0.761505	1.0378	0.832617	0.353065		0.224663
LmxM.27.1110	129	K	24.9049	2.63236e-07	Up	guide RNA-binding protein of 21 kDa OS=Leishmania_mexicana_MHOM/GT/2001/U1103 GN=LmxM.27.1110	LmxM.27.1110	1	5.50475e-55	148.62	3	IPSHHVK(1)NNAFDMAFEK	1.3631	1517600	1494700	1487900	56086	0	0	0	0	57589	830620	851200	840640	0	0	0	0	0	62605	1.99584	1.95303	1.96003	0.0804919					0.0776804	1.09837	1.12301	1.12136						0.0593819
LmxM.27.1220	167	K	8.62366	2.03491e-09	Up	hypothetical protein, conserved OS=Leishmania_mexicana_MHOM/GT/2001/U1103 GN=LmxM.27.1220	LmxM.27.1220	1	6.07623e-122	209.43	3	SAYGTALK(1)NAVAVYHLR	-0.6504	948820	937960	872750	72652	72648	0	88313	95177	103010	461730	496450	467120	98332	100020	104570	29931	0	38610	2.44208	2.40687	2.21381	0.266619	0.269389		0.25558	0.280847	0.292562	1.5854	1.65047	1.58308	0.269099	0.2736	0.290123	0.150463		0.191203
LmxM.27.1220	271	K	5.80896	8.88084e-05	Up	hypothetical protein, conserved OS=Leishmania_mexicana_MHOM/GT/2001/U1103 GN=LmxM.27.1220	LmxM.27.1220	1	1.90835e-22	110.91	2	VALHELSK(1)EDNVIK	-1.6914	167920	137950	124900	0	0	0	20310	20290	25080	79454	76945	76349	21598	20647	0	0	0	0	1.92124	1.5736	1.40837				0.261285	0.266148	0.316643	1.21274	1.13715	1.15022	0.262744	0.251067
LmxM.27.1250	122	K	6.3022	0.0113715	Up	Serine-threonine kinase receptor-associated protein, putative OS=Leishmania_mexicana_MHOM/GT/2001/U1103 GN=LmxM.27.1250	LmxM.27.1250	1	2.05016e-12	94.804	3	LHVWSHPK(1)YIK	1.3609	171270	0	169530	20989	23504	0	0	0	0	81358	81735	84387	17370	22412	19498	8495.2	0	0	2.36429		2.29913	0.350944	0.389024					1.24185	1.30417	1.32807	0.284885	0.356645	0.318462	0.132823
LmxM.27.1250	125	K	4.5758	2.23657e-06	Up	Serine-threonine kinase receptor-associated protein, putative OS=Leishmania_mexicana_MHOM/GT/2001/U1103 GN=LmxM.27.1250	LmxM.27.1250	1	2.49655e-09	119.94	2	YIK(1)SCDWMDQR	1.7141	221060	230610	234860	47567	51571	40252	34019	31504	37997	159200	164810	163000	69393	68095	0	0	0	20303	1.8518	1.85982	1.93282	0.482633	0.517971	0.394323	0.354238	0.319175	0.398745	1.47462	1.59579	1.55668	0.690638	0.657562				0.196247
LmxM.27.1260	366	K	2.22892	7.14576e-08	Up	T-complex protein 1, beta subunit, putative OS=Leishmania_mexicana_MHOM/GT/2001/U1103 GN=LmxM.27.1260	LmxM.27.1260	1	6.85213e-06	90.156	2	FSGLPK(1)GEACTIVLR	-0.53969	262560	255090	263150	97337	99425	98729	105450	97974	101420	276940	271650	279030	99763	93539	98554	0	70921	82484	1.53235	1.47035	1.53143	0.63913	0.6594	0.644649	0.734042	0.677592	0.71364	1.56815	1.54118	1.60625	0.651898	0.618156	0.657281		0.504591	0.581216
LmxM.27.1260	202	K	5.46024	3.04058e-05	Up	T-complex protein 1, beta subunit, putative OS=Leishmania_mexicana_MHOM/GT/2001/U1103 GN=LmxM.27.1260	LmxM.27.1260	1	3.65558e-11	106	2	GSGNLEMINIMK(1)K	1.0427	134500	123900	127150	20265	0	21490	0	0	0	93211	99128	98296	20413	0	0	0	0	0	1.49378	1.35903	1.40813	0.253216		0.267023				1.00439	1.07022	1.07679	0.253834
LmxM.27.1260	163	K	12.7501	0.00188242	Up	T-complex protein 1, beta subunit, putative OS=Leishmania_mexicana_MHOM/GT/2001/U1103 GN=LmxM.27.1260	LmxM.27.1260	1	0.0021776	72.365	3	IAK(1)TTLSSK(1)IITVESDHFAK	0.8426	407200	243800	258340	0	0	24426	0	16897	0	187350	178260	180210	33610	0	0	0	0	0	2.18231	1.29044	1.38059			0.146457		0.107311		0.974169	0.928703	0.952622	0.201678
LmxM.27.1260	283	K	4.96177	1.4874e-08	Up	T-complex protein 1, beta subunit, putative OS=Leishmania_mexicana_MHOM/GT/2001/U1103 GN=LmxM.27.1260	LmxM.27.1260	1	1.09343e-54	204.86	2	IIK(1)HNINCFINR	-1.1494	377340	374630	346350	69273	71673	68597	58875	54225	57925	235080	227010	240750	62599	70585	62764	25376	31585	29901	2.51104	2.46218	2.29827	0.518641	0.542002	0.510711	0.467301	0.427611	0.464743	1.51778	1.46852	1.58023	0.466411	0.531875	0.477286	0.20159	0.256234	0.24024
LmxM.27.1260	473	K	15.8979	9.58139e-07	Up	T-complex protein 1, beta subunit, putative OS=Leishmania_mexicana_MHOM/GT/2001/U1103 GN=LmxM.27.1260	LmxM.27.1260	1	1.0877e-69	166.83	3	LQAEHYQGHK(1)SHGIDVIR	1.1632	561940	526440	541570	37004	38789	36165	23892	20081	21212	320620	339230	340570	83510	84699	86161	0	0	42933	2.63851	2.44126	2.53564	0.195478	0.206967	0.189979	0.133803	0.111733	0.120081	1.4606	1.54838	1.57728	0.439023	0.450321	0.462302			0.243387
LmxM.27.1260	71	K	1.64021	0.0116534	Up	T-complex protein 1, beta subunit, putative OS=Leishmania_mexicana_MHOM/GT/2001/U1103 GN=LmxM.27.1260	LmxM.27.1260	1	7.04313e-104	138.33	2	VTNDGATILK(1)SLFMDNPAAK	1.4407	85724	97568	115490	59695	56829	57432	0	0	37854	69945	71981	112700	0	16924	24746	0	0	9603.6	1.24359	1.39791	1.67065	0.974307	0.936849	0.932135			0.662085	0.984474	1.0151	1.61262		0.278006	0.41023			0.168209
LmxM.27.1300	254	K	1.97645	0.0025897	Up	KH domain containing protein, putative OS=Leishmania_mexicana_MHOM/GT/2001/U1103 GN=LmxM.27.1300	LmxM.27.1300	1	2.78624e-12	135.63	2	EMLLLSAGVK(1)R	-4.8043	128170	120460	114490	0	0	0	0	52741	44979	76040	78401	76392	25004	25348	28593	0	20890	25288	1.75713	1.62631	1.55621					0.896527	0.769645	1.21222	1.27033	1.20012	0.437282	0.435103	0.498881		0.309992	0.375228
LmxM.27.1300	224	K	5.15184	4.52945e-09	Up	KH domain containing protein, putative OS=Leishmania_mexicana_MHOM/GT/2001/U1103 GN=LmxM.27.1300	LmxM.27.1300	1	7.42986e-23	156.14	2	FDHVDEK(1)EETFTIR	0.075506	341100	333220	315920	55468	55404	54004	45767	48257	44954	158110	163780	166950	49562	55559	52788	32927	29797	32371	2.59763	2.49902	2.38537	0.533516	0.534946	0.51099	0.442182	0.455673	0.427294	1.40015	1.47412	1.45694	0.481481	0.529762	0.511623	0.27723	0.24562	0.266818
LmxM.27.1300	351	K	5.21122	5.04636e-08	Up	KH domain containing protein, putative OS=Leishmania_mexicana_MHOM/GT/2001/U1103 GN=LmxM.27.1300	LmxM.27.1300	1	4.53424e-11	125.17	2	GVQAILFCDQK(1)R	-0.10489	491850	475420	487980	80894	77092	77527	75943	60647	69183	260040	258040	291070	0	90371	71648	31539	35469	43972	2.41794	2.30161	2.37846	0.50227	0.480501	0.473539	0.473645	0.369674	0.424497	1.48653	1.49926	1.63972		0.556253	0.448266	0.171417	0.188736	0.233966
LmxM.27.1300	286	K	2.66365	2.02885e-05	Up	KH domain containing protein, putative OS=Leishmania_mexicana_MHOM/GT/2001/U1103 GN=LmxM.27.1300	LmxM.27.1300	1	5.01273e-06	123.5	2	LFAACNTK(1)NK(1)DTTR	0.84564	374930	384060	329470	0	118610	0	107270	99603	104590	230560	241540	250920	110440	0	111560	71678	69094	0	1.73609	1.75131	1.51258		0.69633		0.630162	0.571861	0.604469	1.24144	1.32186	1.33143	0.652351		0.657428	0.366944	0.346303
LmxM.27.1380	48	K	12.9112	0.000423063	Up	60S acidic ribosomal protein P0, putative OS=Leishmania_mexicana_MHOM/GT/2001/U1103 GN=LmxM.27.1380	LmxM.27.1380	1	0.000214085	117.3	2	GK(1)AEFMMGK(1)K	-0.69183	1313400	1620800	1623600	0	142090	0	0	0	155760	1242700	1231900	1121000	106270	98540	0	50372	0	0	1.86525	2.46484	2.47569		0.155666				0.195748	1.50434	1.45956	1.35233	0.129688	0.124747		0.072977
LmxM.27.1380	165	K	9.16493	2.67822e-09	Up	60S acidic ribosomal protein P0, putative OS=Leishmania_mexicana_MHOM/GT/2001/U1103 GN=LmxM.27.1380	LmxM.27.1380	1	0.000115749	107.08	2	IAK(1)GMVEIVTEK(1)K	-0.55769	1305600	1194400	1067200	180830	172220	0	160000	171890	153480	953430	997310	996190	148040	0	143870	106430	113490	110080	2.94453	2.88453	2.58421	0.306698	0.299626		0.288608	0.328733	0.306309	1.83288	1.87647	1.90847	0.286903		0.289601	0.244865	0.267172	0.248933
LmxM.27.1380	173	K	11.9989	5.94218e-09	Up	60S acidic ribosomal protein P0, putative OS=Leishmania_mexicana_MHOM/GT/2001/U1103 GN=LmxM.27.1380	LmxM.27.1380	1	8.94109e-259	303.77	2	VLNTGDK(1)VDNSTATLLQK	-1.1818	4206000	3370900	3077700	409650	455110	415510	328580	342450	360990	2337100	2106000	2234600	307620	302050	327870	237540	232030	283080	3.98878	3.42323	3.13382	0.292159	0.332949	0.30512	0.249227	0.275395	0.302948	1.88925	1.66623	1.80015	0.250689	0.255346	0.277522	0.229808	0.229691	0.269184
LmxM.27.1380	8	K	12.5092	1.4581e-07	Up	60S acidic ribosomal protein P0, putative OS=Leishmania_mexicana_MHOM/GT/2001/U1103 GN=LmxM.27.1380	LmxM.27.1380	1	1.39583e-07	133.68	2	PSITTAK(1)R	-0.76014	984600	990640	964670	113230	112830	110350	0	83466	0	697250	708950	714480	90510	94627	95704	54334	45163	54948	2.99334	3.22502	3.14886	0.258877	0.264614	0.259769		0.215176		1.80687	1.79812	1.84512	0.236452	0.256443	0.259687	0.16851	0.14332	0.167501
LmxM.27.1640	80	K	1.55922	0.00018207	Up	BRO1-like domain/ALIX V-shaped domain binding to HIV, putative OS=Leishmania_mexicana_MHOM/GT/2001/U1103 GN=LmxM.27.1640	LmxM.27.1640	1	8.68957e-56	193.94	2	TPNESFIK(1)HTLLR	-0.15235	136640	114380	108630	60425	63261	56989	51025	50675	52596	56944	55623	55176	49491	46572	55480	19957	0	27294	1.6922	1.4634	1.34371	1.02458	1.07284	0.947228	0.898582	0.913132	0.914863	0.977925	0.956123	0.999706	0.852801	0.812316	0.951196	0.30959		0.426666
LmxM.27.1805	268	K	2.74348	0.000153937	Up	Phosphoenolpyruvate carboxykinase [ATP], glycosomal OS=Leishmania_mexicana_MHOM/GT/2001/U1103 GN=LmxM.27.1805	LmxM.27.1805	1	3.31725e-157	238.02	2	AIGLNPK(1)TEEEIYNAVR	1.547	2577900	2357100	0	929300	1097900	1157700	685700	645300	712420	1537800	1870100	1685200	1149300	1009000	1030700	1093500	1043600	1239600	1.83859	1.67512		0.621143	0.755209	0.782198	0.560443	0.528108	0.595144	1.50956	1.86703	1.67562	1.03684	0.92161	0.947424	0.7259	0.686816	0.828441
LmxM.27.1805	513	K	2.1195	2.91116e-07	Up	Phosphoenolpyruvate carboxykinase [ATP], glycosomal OS=Leishmania_mexicana_MHOM/GT/2001/U1103 GN=LmxM.27.1805	LmxM.27.1805	1	2.72541e-10	141.29	2	ASEALK(1)SAVPK	-0.27298	214760	218940	213000	107780	105030	111460	0	82267	91974	103700	117540	110810	54246	54940	53365	47253	50331	53439	1.86644	1.89598	1.87442	0.87784	0.880358	0.917659		0.820405	0.936252	1.24042	1.42993	1.34259	0.59633	0.611485	0.597737	0.382233	0.40363	0.435191
LmxM.27.1805	40	K	3.84371	5.32355e-08	Up	Phosphoenolpyruvate carboxykinase [ATP], glycosomal OS=Leishmania_mexicana_MHOM/GT/2001/U1103 GN=LmxM.27.1805	LmxM.27.1805	1	3.65068e-36	187.85	2	GALCVLSYAK(1)TGR	1.9512	3797500	3462200	3418600	1025800	1074100	1052800	732400	769670	730020	1895100	2013800	1900800	946040	867860	884920	805440	797220	891600	2.31214	2.10048	2.10762	0.585325	0.630736	0.607247	0.511027	0.53773	0.520618	1.58811	1.71633	1.61346	0.728594	0.676712	0.694408	0.456446	0.447902	0.508685
LmxM.27.1805	401	K	3.37439	5.39233e-07	Up	Phosphoenolpyruvate carboxykinase [ATP], glycosomal OS=Leishmania_mexicana_MHOM/GT/2001/U1103 GN=LmxM.27.1805	LmxM.27.1805	1	5.9717e-44	173.07	2	HATFYGEQLAK(1)K	-0.4084	752890	590440	617840	215970	225920	211250	148530	160540	162980	250320	267910	271730	141440	130080	140530	119130	116530	132320	2.66455	2.08218	2.21409	0.716315	0.771141	0.70826	0.602402	0.651958	0.675609	1.21933	1.32724	1.34071	0.633177	0.589578	0.640997	0.392423	0.380557	0.438814
LmxM.27.1805	292	K	3.0362	7.38835e-08	Up	Phosphoenolpyruvate carboxykinase [ATP], glycosomal OS=Leishmania_mexicana_MHOM/GT/2001/U1103 GN=LmxM.27.1805	LmxM.27.1805	1	7.38273e-42	161.23	2	LK(1)HEIDFNDESISK	-0.53451	472690	478980	446660	150430	156990	148970	150210	141640	132760	181880	200140	197480	111460	108710	108850	92766	110570	102870	2.22939	2.251	2.13311	0.664907	0.714113	0.665595	0.81187	0.766545	0.733405	1.18066	1.32133	1.29849	0.664947	0.656623	0.661654	0.407228	0.48121	0.454632
LmxM.27.1805	185	K	3.65264	6.73985e-05	Up	Phosphoenolpyruvate carboxykinase [ATP], glycosomal OS=Leishmania_mexicana_MHOM/GT/2001/U1103 GN=LmxM.27.1805	LmxM.27.1805	1	1.87218e-80	170.22	2	TGEEVILGTEYAGEMK(1)K	1.9424	263570	265910	274840	60438	56578	58860	73855	74486	89390	133460	139100	143400	52153	48065	52093	51307	0	0	2.10113	2.11224	2.21853	0.451529	0.435002	0.444509	0.674709	0.681358	0.834669	1.46433	1.55222	1.59372	0.525892	0.490709	0.535218	0.380692
LmxM.27.2030	289	K	7.10517	1.28759e-08	Up	branched-chain amino acid aminotransferase, putative OS=Leishmania_mexicana_MHOM/GT/2001/U1103 GN=LmxM.27.2030	LmxM.27.2030	1	7.03152e-50	157.58	2	EGK(1)TELVTAPLDGTVLPGVTR	0.52242	469150	519520	585430	57927	69021	65853	63615	71232	71492	287680	351700	318100	61014	59935	56255	45492	34562	38450	2.11099	2.40428	2.64357	0.292909	0.340872	0.323446	0.326442	0.368775	0.362664	1.8694	2.24042	2.09369	0.379935	0.363325	0.345547	0.310442	0.246206	0.275488
LmxM.27.2090	121	K	6.23127	1.32e-06	Up	hypothetical protein, conserved OS=Leishmania_mexicana_MHOM/GT/2001/U1103 GN=LmxM.27.2090	LmxM.27.2090	1	6.77273e-15	106.11	2	ECAK(1)HWDYSQVNK	-1.0166	158440	113010	115250	21629	23121	18680	23996	0	22863	56722	63641	58803	21191	22121	20991	6725.9	0	8075.4	3.48755	2.53119	2.58442	0.481995	0.518571	0.39951	0.457716		0.443279	1.28849	1.38767	1.33667	0.465115	0.480579	0.449256	0.128821		0.165794
LmxM.27.2100	139	K	3.21557	1.27207e-08	Up	RNA-binding protein, putative OS=Leishmania_mexicana_MHOM/GT/2001/U1103 GN=LmxM.27.2100	LmxM.27.2100	1	8.45202e-120	252.75	2	NK(1)VVISSIYPHTTR	-1.8884	1296300	1298800	1371200	400370	381380	381080	348830	350780	345730	833840	851130	841170	387420	347620	391350	231550	243860	262320	2.08039	2.14082	2.15531	0.714105	0.706067	0.683941	0.615632	0.636875	0.609407	1.30122	1.32711	1.33705	0.650653	0.57293	0.658546	0.407369	0.449282	0.488367
LmxM.27.2330	12	K	4.7265	2.14143e-05	Up	GTP binding protein, putative OS=Leishmania_mexicana_MHOM/GT/2001/U1103 GN=LmxM.27.2330	LmxM.27.2330	1	9.25483e-41	136.84	2	VESK(1)TVLLGRPGSNLK	-1.6421	542850	530330	527770	90977	86410	85155	56996	56910	53856	262050	271410	269640	94231	91901	96000	49957	48552	51511	2.13986	2.23902	2.1819	0.564355	0.593691	0.553931	0.354015	0.367303	0.342876	1.36878	1.44525	1.43196	0.532428	0.520628	0.56426	0.283287	0.291801	0.309058
LmxM.27.2330	35	K	3.98134	0.000167717	Up	GTP binding protein, putative OS=Leishmania_mexicana_MHOM/GT/2001/U1103 GN=LmxM.27.2330	LmxM.27.2330	1	6.17845e-48	126.46	2	VGIVGLPNVGK(1)STFFNVLSK	1.6465	377750	431290	500440	92514	0	0	66249	69629	57580	113350	97235	129330	0	0	19017	0	0	31089	1.6332	1.99715	2.26919	0.629443			0.45132	0.492895	0.402071	0.649383	0.567894	0.753308			0.122597			0.204586
LmxM.27.2400	23	K	7.69256	1.24214e-09	Up	heat shock protein DNAJ, putative OS=Leishmania_mexicana_MHOM/GT/2001/U1103 GN=LmxM.27.2400	LmxM.27.2400	1	6.64252e-166	225.94	2	ETGYYNALGVSPDASEDEIK(1)R	-2.479	908090	868480	847450	108490	103560	105730	82020	81871	79544	359560	381040	355200	72959	66248	72196	0	0	0	2.43026	2.30962	2.22399	0.338197	0.324169	0.326227	0.279861	0.272546	0.269543	1.18756	1.24026	1.16654	0.252699	0.232682	0.252168
LmxM.27.2400	332	K	7.88432	5.03034e-08	Up	heat shock protein DNAJ, putative OS=Leishmania_mexicana_MHOM/GT/2001/U1103 GN=LmxM.27.2400	LmxM.27.2400	1	6.20625e-19	187.82	2	FQVVFPK(1)TLR	-1.1357	4318700	4212100	4181200	511140	503500	524910	360640	386900	368650	2079700	2198400	2178100	435660	414210	456200	173410	199410	205410	2.62809	2.54708	2.49507	0.362312	0.35838	0.368274	0.279808	0.292869	0.284053	1.56189	1.62709	1.62656	0.343113	0.330806	0.362323	0.190181	0.216277	0.216186
LmxM.27.2400	142	K	7.49473	2.13226e-07	Up	heat shock protein DNAJ, putative OS=Leishmania_mexicana_MHOM/GT/2001/U1103 GN=LmxM.27.2400	LmxM.27.2400	1	7.46466e-273	299.1	3	LCTQCSGTGSK(1)VAGVSATCK	1.1399	964200	962580	998080	131430	116180	123590	94351	88128	88723	508980	530880	556080	130520	136480	137020	46158	48549	55419	2.4331	2.41371	2.46974	0.386316	0.34291	0.359562	0.303555	0.276626	0.283483	1.58509	1.62932	1.722	0.426257	0.451988	0.451263	0.209915	0.218348	0.241863
LmxM.27.2400	151	K	2.94218	8.4697e-07	Up	heat shock protein DNAJ, putative OS=Leishmania_mexicana_MHOM/GT/2001/U1103 GN=LmxM.27.2400	LmxM.27.2400	1	3.81087e-63	191.95	2	VAGVSATCK(1)DCSGR	-0.44058	1373200	1372600	1360300	440370	425080	436970	325390	339560	328710	829340	871960	880250	314320	313400	301660	122680	123760	124610	1.92642	1.91346	1.87132	0.719601	0.697501	0.706753	0.581997	0.592545	0.583887	1.43586	1.48776	1.5154	0.570679	0.577009	0.552318	0.310168	0.309438	0.302336
LmxM.27.2480	280	K	5.07755	0.000219958	Up	hypothetical protein, conserved OS=Leishmania_mexicana_MHOM/GT/2001/U1103 GN=LmxM.27.2480	LmxM.27.2480	1	7.72995e-16	84.102	2	VWSTK(1)GAALTVMHTLR	-0.73542	202300	187100	0	0	32004	30424	0	24453	23901	85553	105060	97236	32331	26584	0	0	0	0	1.86303	1.76649			0.426563	0.404518		0.304085	0.294468	1.24457	1.545	1.42283	0.443487	0.369823
LmxM.28.0110	114	K	4.07678	1.24388e-08	Up	proteasome beta 3 subunit, putative OS=Leishmania_mexicana_MHOM/GT/2001/U1103 GN=LmxM.28.0110	LmxM.28.0110	1	2.83083e-37	104	2	FGPWFVEPVIGSIDK(1)STGK	-0.29112	271180	283270	280120	52921	58769	0	0	56080	57698	137180	169450	158190	46628	0	0	33113	37481	0	2.09228	2.16215	2.04884	0.499704	0.527878			0.508191	0.525749	0.959985	1.21829	1.09737	0.359921			0.247371	0.288787
LmxM.28.0210	20	K	2.07244	0.000752164	Up	Histone H2B variant V OS=Leishmania_mexicana_MHOM/GT/2001/U1103 GN=LmxM.28.0210	LmxM.28.0210	1	5.31088e-172	283.34	2	RPIPLGGK(1)GK(1)GK(1)R	-1.7629	19792000	19537000	19639000	9828200	9825700	9755400	7387500	7420000	7489100	21049000	21530000	21478000	15595000	15048000	15094000	6161400	6189000	6516200	1.44207	1.45484	1.48717	0.903845	0.859465	0.82963	0.510672	0.563285	0.563936	1.62412	1.67013	1.64292	0.99787	1.01411	0.977804	0.489344	0.467851	0.48834
LmxM.28.0210	116	K	4.7805	0.000176192	Up	Histone H2B variant V OS=Leishmania_mexicana_MHOM/GT/2001/U1103 GN=LmxM.28.0210	LmxM.28.0210	1	1.68178e-11	111.38	2	LLLPPELAK(1)HAMSEGTK	0.22358	490580	524750	450560	118710	0	0	87813	88419	88773	360710	424060	394550	102270	91287	91702	0	0	0	1.86426	2.03802	1.77949	0.569386			0.316594	0.350082	0.348643	1.45159	1.71566	1.57407	0.3413	0.32086	0.309832
LmxM.28.0240	111	K	4.38746	0.000466884	Up	glycerol-3-phosphate dehydrogenase, putative OS=Leishmania_mexicana_MHOM/GT/2001/U1103 GN=LmxM.28.0240	LmxM.28.0240	1	8.06164e-05	102.55	2	STK(1)LIHGGIR	-2.6743	137770	109990	110890	0	23878	0	25279	25545	0	63343	64405	61797	28213	0	25296	0	18025	0	2.26423	1.73416	1.73184		0.535491		0.384608	0.385947		1.23617	1.26327	1.1848	0.46707		0.423299		0.284679
LmxM.28.0240	501	K	24.7228	9.28576e-05	Up	glycerol-3-phosphate dehydrogenase, putative OS=Leishmania_mexicana_MHOM/GT/2001/U1103 GN=LmxM.28.0240	LmxM.28.0240	1	3.58809e-25	135.13	3	VAPTAPLGIPEDVHK(1)HWR	0.26539	342160	303160	317930	0	0	0	16123	8886.8	15767	166040	183480	159510	59993	56506	56772	0	0	0	2.3157	1.96832	2.04472				0.101016	0.055291	0.09968	1.33438	1.48201	1.25937	0.408997	0.390797	0.391216
LmxM.28.0380	126	K	3.31867	1.62848e-06	Up	saccharopine dehydrogenase, putative OS=Leishmania_mexicana_MHOM/GT/2001/U1103 GN=LmxM.28.0380	LmxM.28.0380	1	2.89866e-16	112.93	2	AIAEYHETAAK(1)K	-0.2592	81930	96664	80377	29773	37550	37221	30053	35034	35531	61696	71545	79569	33593	29498	30952	25104	32388	40024	2.02146	2.37632	1.94078	0.511377	0.656907	0.646159	0.602567	0.701711	0.701222	1.37198	1.56983	1.73857	0.743145	0.668131	0.692664	0.493272	0.629694	0.804599
LmxM.28.0490	426	K	8.07135	8.47866e-05	Up	propionyl-coa carboxylase beta chain, putative OS=Leishmania_mexicana_MHOM/GT/2001/U1103 GN=LmxM.28.0490	LmxM.28.0490	1	2.63426e-41	174.23	2	AYGGAYDVMSSK(1)HLR	-2.0334	192650	187460	194380	20179	19267	20146	0	16837	0	100980	103760	100730	25926	25044	28021	13926	15031	15730	2.76327	2.71941	2.87757	0.394007	0.388051	0.388609		0.21039		1.75493	1.82123	1.72345	0.388704	0.379687	0.408546	0.175264	0.187296	0.193247
LmxM.28.0540	21	K	5.94576	0.000431589	Up	ribosomal protein S26, putative OS=Leishmania_mexicana_MHOM/GT/2001/U1103 GN=LmxM.28.0540	LmxM.28.0540	1	2.60684e-09	100.84	2	VK(1)PIHCFNCGR	-0.93781	171180	163840	161410	65800	59530	0	13570	0	0	181250	180330	184220	0	20478	0	0	0	0	1.55776	1.48216	1.52872	0.29603	0.294256		0.178099			1.05144	1.07341	1.04703		0.174571
LmxM.28.0690	254	K	3.62617	0.000110582	Up	serine/threonine protein phosphatase catalytic subunit, putative OS=Leishmania_mexicana_MHOM/GT/2001/U1103 GN=LmxM.28.0690	LmxM.28.0690	1	6.69018e-11	91.993	2	AHQVVEDGYQFFAK(1)R	0.56543	204210	197680	210180	64386	55349	64291	38179	0	0	137800	138740	133470	59013	0	58571	0	0	43571	1.85605	1.93189	2.01162	0.601732	0.523718	0.609343	0.397685			1.40097	1.35567	1.34949	0.576679		0.571761			0.31853
LmxM.28.0690	232	K	5.45138	0.000271458	Up	serine/threonine protein phosphatase catalytic subunit, putative OS=Leishmania_mexicana_MHOM/GT/2001/U1103 GN=LmxM.28.0690	LmxM.28.0690	1	1.1049e-15	128.97	2	FLNK(1)HQFELICR	-1.4517	0	458130	463440	91489	93278	75417	0	0	0	268370	283840	0	82406	0	0	61752	72194	81312		2.62075	2.59636	0.500493	0.516636	0.418407				1.5971	1.62347		0.471371			0.265323	0.318544	0.347956
LmxM.28.0825	40	K	11.9916	8.09392e-08	Up	RNA binding protein rbp16, putative OS=Leishmania_mexicana_MHOM/GT/2001/U1103 GN=LmxM.28.0825	LmxM.28.0825	1	2.89988e-15	159.93	2	GFGFIEDNADK(1)R	4.6706	788620	767110	783290	53832	46876	55686	67921	71105	68198	603360	599340	618090	0	0	0	64281	60888	65371	2.60397	2.49998	2.57633	0.190384	0.167985	0.202312	0.243935	0.245178	0.231151	1.92013	1.9898	2.00501				0.158372	0.148563	0.157675
LmxM.28.0890	194	K	5.09322	0.000238879	Up	ribonucleoside-diphosphate reductase large chain, putative OS=Leishmania_mexicana_MHOM/GT/2001/U1103 GN=LmxM.28.0890	LmxM.28.0890	1	8.21606e-23	136.94	2	VALGIHGTDLK(1)NVR	-0.89993	131530	0	102750	43452	37519	39734	0	19553	0	86697	78907	80536	14802	0	22176	0	0	0	2.50997		1.99632	0.510485	0.444644	0.455629		0.358768		1.26191	1.10011	1.13336	0.30919		0.459093
LmxM.28.0960	15	K	11.0044	0.00011005	Up	40S ribosomal protein S14 OS=Leishmania_mexicana_MHOM/GT/2001/U1103 GN=LmxM.28.0960	LmxM.28.0960	1	0.00015315	100.75	2	AYGPNVK(1)K	-1.1327	1922000	2031200	2023600	279050	274190	0	0	156740	0	1419900	1422000	1281300	186680	0	0	0	0	0	2.03426	1.88505	1.91051	0.202676	0.2013			0.125797		1.42808	1.45113	1.32961	0.172701
LmxM.28.0960	79	K	43.2336	2.06512e-09	Up	40S ribosomal protein S14 OS=Leishmania_mexicana_MHOM/GT/2001/U1103 GN=LmxM.28.0960	LmxM.28.0960	1	2.30853e-81	245.4	3	CK(1)ECGINALHVK(1)MR	0.22405	1440600	1190900	1219600	43892	45570	43151	34758	31677	31016	881550	858260	882670	115840	113330	113040	58909	57521	63668	4.1767	3.0275	3.15413	0.087326	0.0916452	0.0821407	0.0804178	0.0696424	0.0680077	2.42873	2.39919	2.50905	0.293557	0.295725	0.288338	0.179722	0.172145	0.193876
LmxM.28.0960	8	K	6.41221	2.49206e-05	Up	40S ribosomal protein S14 OS=Leishmania_mexicana_MHOM/GT/2001/U1103 GN=LmxM.28.0960	LmxM.28.0960	1	6.78771e-20	162.21	2	K(1)QEVK(1)AYGPNVK	-1.6623	556770	544660	580020	165540	0	142120	81001	78731	95306	425890	468550	429310	100130	104290	94975	34248	0	0	2.4914	2.13704	2.31517	0.508322		0.417542	0.289245	0.267149	0.32253	1.81096	2.02153	1.88348	0.39163	0.420014	0.373902	0.161262
LmxM.28.0960	99	K	10.1048	3.26239e-08	Up	40S ribosomal protein S14 OS=Leishmania_mexicana_MHOM/GT/2001/U1103 GN=LmxM.28.0960	LmxM.28.0960	1	8.43677e-22	156.14	2	TK(1)SPGPGAQAALR	0.27251	1494300	1404900	1407600	221270	215600	211860	148650	149180	153190	1053600	1094000	1083100	159380	164510	160640	65956	0	0	3.02874	2.49683	2.54493	0.307762	0.303119	0.281936	0.240434	0.229284	0.234821	2.02928	2.13795	2.15236	0.282359	0.300103	0.286456	0.140672
LmxM.28.1010	96	K	8.22133	1.3406e-09	Up	ribosomal protein S20, putative OS=Leishmania_mexicana_MHOM/GT/2001/U1103 GN=LmxM.28.1010	LmxM.28.1010	1	2.20423e-21	150.44	2	IIDLHAPTEQVK(1)K	-2.4617	2046700	1886600	1873500	244240	239850	235900	225450	239790	245120	1417200	1407400	1452800	226970	219390	218230	125740	128380	148500	3.10935	2.61189	2.57069	0.361514	0.348496	0.318573	0.314768	0.33012	0.343702	1.90628	1.76304	1.96142	0.333109	0.335232	0.327229	0.195202	0.199129	0.232646
LmxM.28.1110	409	K	2.80623	1.20729e-07	Up	WD domain, G-beta repeat, putative OS=Leishmania_mexicana_MHOM/GT/2001/U1103 GN=LmxM.28.1110	LmxM.28.1110	1	4.29838e-23	117.77	2	LVFSVADAHK(1)VEQGSR	-1.4011	129470	115960	122160	43750	37844	0	45731	44706	48587	56680	64595	63756	34495	30947	32277	0	21653	23539	2.10347	1.99669	2.00061	0.774284	0.685302		0.707868	0.692135	0.763758	1.16692	1.3365	1.3299	0.605848	0.533022	0.566524		0.374727	0.406021
LmxM.28.1200	341	K	2.64563	5.87005e-05	Up	luminal binding protein 1 (BiP), putative OS=Leishmania_mexicana_MHOM/GT/2001/U1103 GN=LmxM.28.1200	LmxM.28.1200	1	1.6824e-83	173.54	2	FEELNMALFK(1)NTLVPVQK	0.54244	203810	198250	188780	74080	76799	76179	0	0	61348	157760	300940	169850	41757	44004	59664	52335	37453	29304	1.79154	1.75054	1.6808	0.673464	0.718614	0.699681			0.540452	1.30996	2.531	1.4144	0.407319	0.433089	0.587445	0.487164	0.352313	0.273561
[truncated: 624 more rows]
[truncated: 13 more columns]

## Sheet: Dac3vscontrol
Protein accession	Position	Amino acid	Dac3/control Ratio	Dac3/control P value	Regulated Type	Protein description	Gene name	Localization probability	PEP	Score	Charge	Modified sequence	Mass error [ppm]	Intensity Dac1_1	Intensity Dac1_2	Intensity Dac1_3	Intensity WT_1	Intensity WT_2	Intensity WT_3	Intensity Cas9_1	Intensity Cas9_2	Intensity Cas9_3	Intensity Dac3_1	Intensity Dac3_2	Intensity Dac3_3	Intensity Dac4_1	Intensity Dac4_2	Intensity Dac4_3	Intensity Dac5_1	Intensity Dac5_2	Intensity Dac5_3	Dac1_1	Dac1_2	Dac1_3	WT_1	WT_2	WT_3	Cas9_1	Cas9_2	Cas9_3	Dac3_1	Dac3_2	Dac3_3	Dac4_1	Dac4_2	Dac4_3	Dac5_1	Dac5_2	Dac5_3
[truncated: 1,415 more rows]
[truncated: 13 more columns]

[truncated: 2 more sheets: Dac4vscontrol, Dac5vscontrol]
