# Supplementary material for: AcetyLeish: acetylation-driven control of stage differentiation and virulence in Leishmania mexicana
Source: Research Square preprint supplement (doi:10.21203/rs.3.rs-7520632/v1), 2025-09-17
Supplement: Supplementary file 2 [file 347be61eca712f691ff46b1d.xlsx]

## Sheet: Sup Table 1
Supplementary Table 1. List of primers for generate the homologous recombination (HR) and sgRNA fragments.
	Gene	ID	Primers name	Knockout sequences	Fluorescent-tagged sequences
	DAC1	LmxM.21.0680	5' sgRNA	gaaattaatacgactcactataggGCGTCTTAGAGAAGGGTGAAgttttagagctagaaatagc	Yes
			3' sgRNA	gaaattaatacgactcactataggTCGTCCATTCACGCCTGTGGgttttagagctagaaatagc	No
			Upstream forward	GAGAGGGTTGGCGTTCACTTTTCTTTTTTCTAATACGACTCACTATAAAACTGGAAGATCTAGCCGGCCgtataatgcagacctgctgc	Yes
			Downstream reverse	CTCTGAGCGCTGCTTCGCTCATTACCAACGccaatttgagagacctgtgc	No
			Upstream reverse	No	CTCGGCATCATCCTTGTGCAACGCGTCCATactacccgatcctgatccag
	DAC3	LmxM.21.1870	5' sgRNA	gaaattaatacgactcactataggTGCCTAGCTCAGCGAAATCCgttttagagctagaaatagc	Yes
			3' sgRNA	gaaattaatacgactcactataggTCAGTATGCATGATGATGCAgttttagagctagaaatagc	No
			Upstream forward	CTGTCGAGGAAAGAACGGGTAGATCTGCCTTAATACGACTCACTATAAAACTGGAAGTATCTCTTCCTTgtataatgcagacctgctgc	Yes
			Downstream reverse	CTGGGGGAAGGAGGGAAAGCGGTGGTGCCAccaatttgagagacctgtgc	No
			Upstream reverse	No	CTTCTCATTGCTGCGCTGCCGCTTCGGCATactacccgatcctgatccag
	DAC4	LmxM.08.1090	5' sgRNA	gaaattaatacgactcactataggGTCGTCGACAAGACACAAGTgttttagagctagaaatagc	No
			3' sgRNA	gaaattaatacgactcactataggCACGCGGTGATGAAAGCCTAgttttagagctagaaatagc	Yes
			Upstream forward	CACGATGTTCCACGAGCTCACCGTCCGCCGTAATACGACTCACTATAAAACTGGAAGTAGATGCCGTCCgtataatgcagacctgctgc	No
			Downstream forward	No	CAGCAAATACACCGGGAAGCCATGACACTTggttctggtagtggttccgg
			Downstream reverse	TCACAATGCAAAGCTTTGTGGCACACTAGGccaatttgagagacctgtgc	Yes
	DAC5	LmxM.24.1370	5' sgRNA	gaaattaatacgactcactataggGGGCGCATTTGCCGGCAGCCgttttagagctagaaatagc	Yes
			3' sgRNA	gaaattaatacgactcactataggGTGTTTCACACGGCGCGCTGCgttttagagctagaaatagc	No
			Upstream forward	CTTTATCGAAGAGGCGCAGCTGAGGACATTTAATACGACTCACTATAAAACTGGAAGCGAGCGCCGTCCgtataatgcagacctgctgc	Yes
			Downstream reverse	ACCTAGCGCGGTGGCTTAGTGGATCGCCCAccaatttgagagacctgtgc	No
			Upstream reverse	No	GAGCGCGGGAAGCTGCTCCGGAGATGACATactacccgatcctgatccag
All sequences are written in the 5’ to 3’ orientation.
