# Supplementary material for: AcetyLeish: acetylation-driven control of stage differentiation and virulence in Leishmania mexicana
Source: Research Square preprint supplement (doi:10.21203/rs.3.rs-7520632/v1), 2025-09-17
Supplement: Supplementary file 3 [file 577cc7a1939fe3a5ef82b9f1.xlsx]

## Sheet: DAC1 vs Control Upreg PTN
Supplementary Table 5. List of DE proteins in DACs mutants compared to parental cells.
DAC1-/+ Upregulated proteins compared to Cas9 parasites
Protein accession	Protein description	Gene name	Dac1/control Ratio	Dac1/control P value	Regulated Type	MW [kDa]	Coverage [%]	Peptides	Unique peptides	Razor + unique peptides	LFQ intensity Dac1_1	LFQ intensity Dac1_2	LFQ intensity Dac1_3	LFQ intensity WT_1	LFQ intensity WT_2	LFQ intensity WT_3	LFQ intensity Cas9_1	LFQ intensity Cas9_2	LFQ intensity Cas9_3	LFQ intensity Dac3_1	LFQ intensity Dac3_2	LFQ intensity Dac3_3	LFQ intensity Dac4_1	LFQ intensity Dac4_2	LFQ intensity Dac4_3	LFQ intensity Dac5_1	LFQ intensity Dac5_2	LFQ intensity Dac5_3	Dac1_1	Dac1_2	Dac1_3	WT_1	WT_2	WT_3	Cas9_1	Cas9_2	Cas9_3	Dac3_1	Dac3_2	Dac3_3	Dac4_1	Dac4_2	Dac4_3	Dac5_1	Dac5_2	Dac5_3	Subcellular localization	KEGG KO No.	KEGG Gene
LmxM.08_29.0251	thymine-7-hydroxylase, putative OS=Leishmania_mexicana_MHOM/GT/2001/U1103 GN=LmxM.08_29.0251	LmxM.08_29.0251	1.74304	9.68128e-10	Up	36.434	60.5	16	16	16	430420	452570	441590	254260	251230	248310	251960	259260	254830	277840	293030	280590	277430	292570	288150	76831	86638	81177	1.61452	1.6976	1.65642	0.953736	0.94237	0.931417	0.945109	0.972491	0.955874	1.04219	1.09916	1.0525	1.04065	1.09744	1.08086	0.288195	0.324981	0.304497	cytoplasm,nucleus
LmxM.27.1310	arginyl-tRNA synthetase, putative OS=Leishmania_mexicana_MHOM/GT/2001/U1103 GN=LmxM.27.1310	LmxM.27.1310	1.55995	2.52171e-09	Up	78.015	75.9	55	55	55	1676000	1704400	1689200	1047200	1063400	1073500	1113700	1102600	1099300	1214900	1205100	1205500	1097800	1082900	1092900	1081000	1072800	1077500	1.39025	1.41381	1.4012	0.868657	0.882095	0.890473	0.923819	0.914612	0.911874	1.00777	0.999636	0.999968	0.91063	0.89827	0.906566	0.896694	0.889892	0.893791	cytoplasm	K01887	RARS, argS; arginyl-tRNA synthetase [EC:6.1.1.19]
LmxM.31.3650	hypothetical protein OS=Leishmania_mexicana_MHOM/GT/2001/U1103 GN=LmxM.31.3650	LmxM.31.3650	4.16108	4.66476e-08	Up	39.133	64.1	17	17	17	447830	407960	403420	94397	89750	88635	111220	108880	112350	253360	242160	246350	368490	369120	365920	952640	942490	970040	1.226	1.11685	1.10442	0.258425	0.245703	0.242651	0.30448	0.298074	0.307574	0.693608	0.662946	0.674417	1.00879	1.01052	1.00176	2.60798	2.5802	2.65562	mitochondria	K05605	HIBCH; 3-hydroxyisobutyryl-CoA hydrolase [EC:3.1.2.4]
LmxM.02.0580	hypothetical protein, conserved OS=Leishmania_mexicana_MHOM/GT/2001/U1103 GN=LmxM.02.0580	LmxM.02.0580	1.55433	2.76243e-07	Up	402.05	17.3	45	45	45	509820	507000	502690	347610	325570	319600	332980	314010	315430	452370	435490	447620	432160	401490	425750	391030	433180	423550	1.25411	1.24717	1.23657	0.855088	0.800872	0.786186	0.8191	0.772435	0.775928	1.11279	1.07126	1.1011	1.06307	0.987628	1.04731	0.961897	1.06558	1.04189	nucleus
LmxM.36.6080	rab-like GTPase activating protein, putative OS=Leishmania_mexicana_MHOM/GT/2001/U1103 GN=LmxM.36.6080	LmxM.36.6080	2.86779	3.36794e-07	Up	47.656	8.7	2	2	2	124620	131130	109110	48781	42198	39534	42028	41529	40384	119430	116990	117370	102300	93120	82500	73919	0	0	1.50491	1.58352	1.31761	0.589079	0.509583	0.477412	0.50753	0.501504	0.487677	1.44224	1.41277	1.41736	1.23537	1.12452	0.996269	0.892645			nucleus	K19944	TBC1D10; TBC1 domain family member 10
LmxM.27.2330	GTP binding protein, putative OS=Leishmania_mexicana_MHOM/GT/2001/U1103 GN=LmxM.27.2330	LmxM.27.2330	1.56922	5.4848e-07	Up	44.003	65.6	20	20	20	2951900	2756100	2814600	1875800	1693600	1788800	1873400	1802900	1827700	2227700	2185200	2191100	2059400	2054000	1979700	2052000	1936100	1939400	1.39792	1.3052	1.3329	0.888317	0.802033	0.847117	0.887181	0.853794	0.865539	1.05497	1.03484	1.03763	0.975264	0.972707	0.937521	0.97176	0.916873	0.918436	cytoplasm	K19788	OLA1; obg-like ATPase 1
LmxM.05.1210	protein phosphatase type 1 regulator-like protein OS=Leishmania_mexicana_MHOM/GT/2001/U1103 GN=LmxM.05.1210	LmxM.05.1210	1.63636	9.02536e-07	Up	44.82	60.4	24	24	24	721730	700090	729840	447810	426320	480200	424630	423640	427220	687480	737320	712540	692690	713720	699610	656530	610820	655640	1.18664	1.15106	1.19997	0.736272	0.700939	0.789526	0.69816	0.696533	0.702419	1.13033	1.21227	1.17153	1.13889	1.17347	1.15027	1.07944	1.00429	1.07798	cytoplasm	K17550	PPP1R7, SDS22; protein phosphatase 1 regulatory subunit 7
LmxM.04.0190	surface antigen-like protein OS=Leishmania_mexicana_MHOM/GT/2001/U1103 GN=LmxM.04.0190	LmxM.04.0190	1.77495	1.16146e-06	Up	74.134	31.6	14	7	14	477870	462520	477210	0	0	0	264060	265520	269090	204440	187440	201070	535060	527270	526870	774320	753710	772890	1.06996	1.03559	1.06849				0.591237	0.594506	0.6025	0.457747	0.419683	0.450201	1.19801	1.18057	1.17968	1.73372	1.68758	1.73052	extracellular
LmxM.28.1930	Zinc transporter 3, putative OS=Leishmania_mexicana_MHOM/GT/2001/U1103 GN=LmxM.28.1930	LmxM.28.1930	1.63451	1.73955e-06	Up	46.892	6.4	2	2	2	289290	301000	293160	190740	172650	180690	171240	193850	171830	558100	563830	569180	290900	271050	276630	147220	160950	158000	1.04978	1.09227	1.06382	0.692158	0.626513	0.655689	0.621397	0.703444	0.623538	2.02524	2.04603	2.06544	1.05562	0.983588	1.00384	0.534233	0.584056	0.573351	plasma membrane	K14709	SLC39A1_2_3, ZIP1_2_3; solute carrier family 39 (zinc transporter), member 1/2/3
LmxM.05.0310	glutaredoxin-like protein OS=Leishmania_mexicana_MHOM/GT/2001/U1103 GN=LmxM.05.0310	LmxM.05.0310	1.60265	3.13643e-06	Up	19.71	43.9	6	6	6	315290	312530	301940	187320	190890	183760	205830	209090	183390	298130	308690	302330	292290	289910	283260	322060	309580	328660	1.17622	1.16593	1.12642	0.698818	0.712136	0.685537	0.767871	0.780033	0.684156	1.11221	1.1516	1.12787	1.09042	1.08154	1.05673	1.20148	1.15492	1.2261	mitochondria	K07390	grxD, GLRX5; monothiol glutaredoxin
LmxM.30.1190	cytochrome b5-like Heme/Steroid binding domain containing protein, putative OS=Leishmania_mexicana_MHOM/GT/2001/U1103 GN=LmxM.30.1190	LmxM.30.1190	1.74113	5.3459e-06	Up	14.981	59.2	6	6	6	162000	154290	153500	89549	81701	85576	93205	101070	88536	205090	202220	204140	132550	133600	119860	170730	177950	186850	1.14694	1.09235	1.08676	0.633996	0.578433	0.605868	0.65988	0.715563	0.626824	1.45201	1.43169	1.44529	0.938438	0.945872	0.848594	1.20875	1.25986	1.32288	cytoplasm	K23490	CYB5; cytochrome b5
LmxM.21.0200	major vault protein-like protein OS=Leishmania_mexicana_MHOM/GT/2001/U1103 GN=LmxM.21.0200	LmxM.21.0200	1.52717	5.87431e-06	Up	105.23	33.5	23	23	23	137810	136970	135400	82226	86395	86470	92317	95274	94493	114990	116850	119140	113360	118870	116930	120050	116920	117880	1.23884	1.23129	1.21717	0.739167	0.776644	0.777319	0.82988	0.856462	0.849441	1.0337	1.05042	1.071	1.01905	1.06858	1.05114	1.07918	1.05105	1.05968	cytoplasm	K17266	MVP; major vault protein
LmxM.31.0470	hypothetical protein, conserved OS=Leishmania_mexicana_MHOM/GT/2001/U1103 GN=LmxM.31.0470	LmxM.31.0470	4.44602	6.04126e-06	Up	96.702	5	3	3	3	1339000	1250300	1368300	0	0	260120	298390	281430	346920	1174400	1242500	1196900	423320	386660	390430	550170	443490	418580	1.88411	1.7593	1.92533			0.366015	0.419864	0.396	0.488151	1.6525	1.74832	1.68416	0.595653	0.544069	0.549374	0.774144	0.624034	0.588984	extracellular
LmxM.17.0990	hypothetical protein, conserved OS=Leishmania_mexicana_MHOM/GT/2001/U1103 GN=LmxM.17.0990	LmxM.17.0990	1.95665	6.99844e-06	Up	675.34	6	25	25	25	134960	124870	111160	61206	59413	59906	66410	71281	60993	119020	124030	125600	92390	94487	98576	91562	106790	105060	1.42253	1.31618	1.17167	0.645136	0.626237	0.631434	0.699988	0.751331	0.642891	1.25452	1.30733	1.32388	0.973828	0.995931	1.03903	0.965101	1.12561	1.10738	cytoplasm
LmxM.19.1530	peptidylprolyl isomerase-like protein OS=Leishmania_mexicana_MHOM/GT/2001/U1103 GN=LmxM.19.1530	LmxM.19.1530	1.59968	8.67987e-06	Up	47.776	47.7	17	17	17	446830	486150	470830	271680	272020	295350	295330	320750	299980	593830	619260	595620	387560	385810	374220	751060	729250	764770	0.96204	1.0467	1.01371	0.584936	0.585668	0.635898	0.635855	0.690585	0.645867	1.27854	1.33329	1.28239	0.834429	0.830662	0.805708	1.61706	1.5701	1.64657	cytoplasm	K09571	FKBP4_5; FK506-binding protein 4/5 [EC:5.2.1.8]
LmxM.05.0820	hypothetical protein, conserved OS=Leishmania_mexicana_MHOM/GT/2001/U1103 GN=LmxM.05.0820	LmxM.05.0820	1.5127	1.1297e-05	Up	100.18	58.2	37	37	37	511500	512700	508460	359660	358960	346940	315650	316270	328910	569090	561800	560050	526820	531990	523180	384150	386610	398130	1.15075	1.15345	1.14391	0.809147	0.807572	0.78053	0.710135	0.71153	0.739967	1.28031	1.26391	1.25998	1.18522	1.19685	1.17703	0.864244	0.869778	0.895695	nucleus
LmxM.20.0070	hypothetical protein, conserved OS=Leishmania_mexicana_MHOM/GT/2001/U1103 GN=LmxM.20.0070	LmxM.20.0070	1.57944	1.92819e-05	Up	23.092	11.3	2	2	2	2181300	2388700	0	1454700	1552100	1467900	1409700	1376700	1419200	2241800	2206100	2172400	1484300	1550500	1400800	1472900	1461000	1350200	1.29702	1.42034		0.864975	0.92289	0.872824	0.838218	0.818596	0.843867	1.33299	1.31176	1.29172	0.882576	0.921939	0.832926	0.875797	0.868721	0.802839	nucleus
LmxM.05.0730	hypothetical protein, conserved OS=Leishmania_mexicana_MHOM/GT/2001/U1103 GN=LmxM.05.0730	LmxM.05.0730	1.54311	1.97074e-05	Up	78.871	37.2	17	17	17	262320	255280	249880	149330	150250	160590	175770	175640	183140	240270	251950	249790	254320	268930	270080	211250	230760	232500	1.18875	1.15684	1.13237	0.676714	0.680883	0.72774	0.796531	0.795942	0.829929	1.08882	1.14175	1.13196	1.15249	1.2187	1.22391	0.957314	1.04573	1.05361	mitochondria
LmxM.05.0870	hypothetical protein, conserved OS=Leishmania_mexicana_MHOM/GT/2001/U1103 GN=LmxM.05.0870	LmxM.05.0870	1.74052	2.53722e-05	Up	203.66	10.6	11	11	11	105930	114350	106240	64374	68660	68099	60614	53957	59494	91697	95007	85591	96754	93649	86125	61934	88416	71488	1.29501	1.39794	1.2988	0.786979	0.839376	0.832518	0.741013	0.65963	0.727321	1.12101	1.16147	1.04636	1.18283	1.14487	1.05289	0.75715	1.0809	0.873949	plasma membrane
LmxM.31.3930	HECT E3 ligase, putative OS=Leishmania_mexicana_MHOM/GT/2001/U1103 GN=LmxM.31.3930	LmxM.31.3930	1.79376	3.77885e-05	Up	453.87	18.1	48	48	48	108560	106420	100460	59204	55806	48499	60581	62682	64936	95747	97579	94755	107480	106870	108010	110950	107610	104610	1.22072	1.19666	1.12964	0.665729	0.62752	0.545355	0.681213	0.704838	0.730184	1.07664	1.09724	1.06549	1.20858	1.20172	1.21454	1.2476	1.21004	1.1763	plasma membrane	K12233	HECTD3; E3 ubiquitin-protein ligase HECTD3 [EC:2.3.2.26]
LmxM.32.0970	hypothetical protein, conserved OS=Leishmania_mexicana_MHOM/GT/2001/U1103 GN=LmxM.32.0970	LmxM.32.0970	1.53506	3.84552e-05	Up	67.007	33.3	17	17	17	246050	223880	215780	152740	152080	131480	149390	147900	159810	237160	217180	227660	173180	183280	174830	166980	163970	157510	1.34992	1.22829	1.18385	0.837988	0.834367	0.721347	0.819608	0.811434	0.876776	1.30115	1.19153	1.24903	0.950129	1.00554	0.959181	0.916113	0.899599	0.864158	nucleus
LmxM.30.0740	Tir chaperone protein (CesT) family, putative OS=Leishmania_mexicana_MHOM/GT/2001/U1103 GN=LmxM.30.0740	LmxM.30.0740	1.50918	4.47525e-05	Up	36.613	61.6	14	14	14	365870	378250	351020	255450	264550	250640	231250	231660	217750	401390	371930	359670	359910	350080	371580	335170	257970	288110	1.1672	1.2067	1.11983	0.814941	0.843972	0.799596	0.737738	0.739046	0.69467	1.28052	1.18654	1.14743	1.14819	1.11683	1.18542	1.06926	0.82298	0.919133	nucleus
LmxM.30.3070	ferrous iron transport protein OS=Leishmania_mexicana_MHOM/GT/2001/U1103 GN=LmxM.30.3070	LmxM.30.3070	1.79879	4.77943e-05	Up	45.957	29.2	11	11	11	429720	499950	475710	280320	284700	219160	273920	261230	243250	760790	721580	744240	398380	384980	401710	629020	632860	659710	0.931785	1.08407	1.03151	0.607833	0.61733	0.475216	0.593955	0.566439	0.527452	1.64966	1.56464	1.61378	0.863829	0.834773	0.871049	1.36394	1.37226	1.43048	plasma membrane
LmxM.36.3675	calmodulin, putative OS=Leishmania_mexicana_MHOM/GT/2001/U1103 GN=LmxM.36.3675	LmxM.36.3675	1.50466	5.24479e-05	Up	24.155	24.9	4	4	4	121530	134550	134520	97220	86953	83057	78806	86672	86479	99476	100350	108100	88251	99970	84753	88139	92672	89737	1.24205	1.37511	1.37481	0.993598	0.888668	0.848851	0.805405	0.885797	0.883824	1.01665	1.02559	1.10479	0.901934	1.0217	0.866184	0.90079	0.947117	0.917121	mitochondria	K02183	CALM; calmodulin
LmxM.27.0100	protein kinase, putative OS=Leishmania_mexicana_MHOM/GT/2001/U1103 GN=LmxM.27.0100	LmxM.27.0100	1.51743	5.82813e-05	Up	71.604	18.3	9	9	9	229470	191630	194120	146450	133660	139660	129910	127790	133400	131680	118500	123620	135520	129130	131690	116310	100260	90780	1.64982	1.37776	1.39567	1.05293	0.960976	1.00411	0.934014	0.918772	0.959107	0.94674	0.85198	0.888791	0.974349	0.928407	0.946812	0.836235	0.72084	0.652681	cytoplasm	K08829	MAK; male germ cell-associated kinase [EC:2.7.11.22]
LmxM.10.0630	Flagellum adhesion protein 1 OS=Leishmania_mexicana_MHOM/GT/2001/U1103 GN=LmxM.10.0630	LmxM.10.0630	1.62127	6.60745e-05	Up	63.062	11.6	5	5	5	123820	126420	119720	0	0	0	79186	75901	73105	140800	127030	132830	0	60487	50318	107690	133860	93192	1.20017	1.22537	1.16043				0.76754	0.735699	0.708598	1.36476	1.23129	1.28751		0.586293	0.487726	1.04383	1.29749	0.903299	plasma membrane
LmxM.20.0180	hypothetical protein, conserved OS=Leishmania_mexicana_MHOM/GT/2001/U1103 GN=LmxM.20.0180	LmxM.20.0180	1.61746	7.69166e-05	Up	85.054	17.2	11	10	11	175320	160330	164440	100380	92174	100660	103210	122380	99561	150200	138410	125820	131200	129560	137620	147710	166200	151100	1.31694	1.20434	1.23522	0.75402	0.69238	0.756124	0.775278	0.919277	0.747868	1.12825	1.03969	0.945117	0.98553	0.973211	1.03375	1.10955	1.24844	1.13501	nucleus
LmxM.33.4140	hypothetical protein, conserved OS=Leishmania_mexicana_MHOM/GT/2001/U1103 GN=LmxM.33.4140	LmxM.33.4140	2.15844	7.75282e-05	Up	50.957	5.6	2	2	2	100350	87970	95551	52616	43432	37987	39540	0	45620	76858	68472	64356	54345	48885	48699	45782	53360	43669	1.69326	1.48437	1.61229	0.88782	0.732853	0.640977	0.667181		0.769773	1.29687	1.15537	1.08592	0.916995	0.824865	0.821727	0.772506	0.900374	0.736853	nucleus
LmxM.27.1990	Rab-GTPase-TBC domain containing protein, putative OS=Leishmania_mexicana_MHOM/GT/2001/U1103 GN=LmxM.27.1990	LmxM.27.1990	1.8871	7.79827e-05	Up	106.65	8.1	6	6	6	44301	44244	46599	26854	25466	28149	22470	21412	18878	26495	25128	23818	30049	28239	28809	27560	39629	37981	1.46026	1.45838	1.536	0.885165	0.839414	0.927851	0.740659	0.705785	0.622259	0.873332	0.828273	0.785092	0.990479	0.930818	0.949606	0.908437	1.30626	1.25194	nucleus	K20360	TBC1D22, GYP1; TBC1 domain family member 2
LmxM.27.2250	EMG1/NEP1 methyltransferase, putative OS=Leishmania_mexicana_MHOM/GT/2001/U1103 GN=LmxM.27.2250	LmxM.27.2250	1.54615	9.75983e-05	Up	26.486	35	8	8	8	1237200	1121200	1248300	847970	816430	843270	718680	735230	703800	898670	907600	859050	766860	790130	765120	723980	783630	768160	1.43349	1.29908	1.44635	0.982503	0.945959	0.977057	0.832701	0.851877	0.81546	1.04125	1.05159	0.995341	0.888525	0.915487	0.886509	0.838842	0.907955	0.890031	cytoplasm,nucleus	K14568	EMG1, NEP1; rRNA small subunit pseudouridine methyltransferase Nep1 [EC:2.1.1.260]
LmxM.17.0610	Acyl CoA binding protein, putative OS=Leishmania_mexicana_MHOM/GT/2001/U1103 GN=LmxM.17.0610	LmxM.17.0610	2.85316	0.000104175	Up	54.847	6.9	3	3	3	146380	155500	263460	69917	65496	59484	67289	62173	71931	83579	81321	82560	183030	136450	155740	276030	281700	285920	1.04228	1.10722	1.87593	0.497835	0.466355	0.423548	0.479122	0.442695	0.512175	0.595113	0.579035	0.587857	1.30324	0.971574	1.10893	1.96543	2.00581	2.03585	cytoplasm	K08762	DBI, ACBP; diazepam-binding inhibitor (GABA receptor modulator, acyl-CoA-binding protein)
LmxM.27.0690	hypothetical protein, unknown function OS=Leishmania_mexicana_MHOM/GT/2001/U1103 GN=LmxM.27.0690	LmxM.27.0690	2.06712	0.000108176	Up	98.423	17.3	10	10	10	133990	112360	98629	53846	58606	59990	61933	44199	55203	153050	167740	172160	90760	92183	73345	103840	97449	109360	1.38719	1.16325	1.0211	0.557462	0.606742	0.621071	0.641186	0.457588	0.571511	1.58451	1.7366	1.78236	0.939629	0.954362	0.759334	1.07505	1.00888	1.13219	nucleus
LmxM.32.3070	Flagellar Member 8 OS=Leishmania_mexicana_MHOM/GT/2001/U1103 GN=LmxM.32.3070	LmxM.32.3070	1.61071	0.000121045	Up	91.036	30.2	9	4	9	1317600	1148300	1133000	704890	688570	674790	844290	804530	751640	1185300	1068700	1132000	969100	1054100	957010	1069700	941800	898060	1.36748	1.19177	1.1759	0.731577	0.714639	0.700338	0.876255	0.834989	0.780097	1.23018	1.10916	1.17486	1.00579	1.09401	0.993242	1.1102	0.977457	0.932061	nucleus
LmxM.15.0440c	hypothetical protein (fragment) OS=Leishmania_mexicana_MHOM/GT/2001/U1103 GN=LmxM.15.0440c	LmxM.15.0440c	7.28761	0.000142598	Up	76.905	41.8	19	16	16	216600	186990	172700	0	0	0	23457	22422	33199	58746	59479	53704	128250	127000	122970	343200	273570	312900	1.52165	1.31363	1.21324				0.164789	0.157518	0.233228	0.412699	0.417849	0.377278	0.900975	0.892194	0.863882	2.41103	1.92187	2.19817	nucleus
LmxM.09.1530	Radial spoke protein 11 OS=Leishmania_mexicana_MHOM/GT/2001/U1103 GN=LmxM.09.1530	LmxM.09.1530	1.59995	0.000142906	Up	17.84	21.1	2	2	2	842500	790530	650080	439720	523060	459970	463690	492120	475420	586830	572760	0	568010	402760	497800	536060	521670	527860	1.53168	1.4372	1.18186	0.799419	0.950933	0.836234	0.842997	0.894683	0.864322	1.06687	1.04129		1.03265	0.732225	0.90501	0.974567	0.948406	0.959659	cytoplasm	K25457	ROPN1L; ropporin-1-like protein
LmxM.27.1490	hypothetical protein, conserved OS=Leishmania_mexicana_MHOM/GT/2001/U1103 GN=LmxM.27.1490	LmxM.27.1490	1.60381	0.000149992	Up	74.631	23	12	12	12	137900	118020	129660	72174	71614	78210	85557	82271	91003	97667	81724	79900	106430	119230	110140	62165	88385	77407	1.46923	1.25742	1.38144	0.768964	0.762998	0.833274	0.911551	0.876541	0.969574	1.04057	0.870713	0.851279	1.13394	1.27031	1.17347	0.662325	0.941681	0.824718	nucleus
LmxM.08_29.1450	phosphatidylinositol-kinase domain protein, putative OS=Leishmania_mexicana_MHOM/GT/2001/U1103 GN=LmxM.08_29.1450	LmxM.08_29.1450	1.55735	0.000160598	Up	290.93	22.2	41	40	41	949960	932970	955500	551190	565640	525500	690430	650500	661950	890710	923690	894480	887080	892770	864780	1099500	1132300	1093700	1.12772	1.10755	1.1343	0.654333	0.671487	0.623836	0.819628	0.772226	0.785819	1.05739	1.09654	1.06186	1.05308	1.05983	1.0266	1.30525	1.34418	1.29836	plasma membrane	K00888	PI4KA; phosphatidylinositol 4-kinase A [EC:2.7.1.67]
LmxM.07.0990	nucleolar RNA-binding protein, putative OS=Leishmania_mexicana_MHOM/GT/2001/U1103 GN=LmxM.07.0990	LmxM.07.0990	2.8233	0.000177318	Up	36.271	16.4	5	5	5	1395200	1501300	1372800	390070	346780	393970	610190	639500	643820	1885200	1939500	1708900	968290	972420	916600	1426600	1521100	1580200	1.24248	1.33697	1.22253	0.347373	0.308822	0.350846	0.543399	0.569501	0.573348	1.67885	1.7272	1.52184	0.862302	0.86598	0.81627	1.27045	1.3546	1.40723	cytoplasm,nucleus
LmxM.20.0090	Ion channel/Calcium-activated BK potassium channel alpha subunit, putative OS=Leishmania_mexicana_MHOM/GT/2001/U1103 GN=LmxM.20.0090	LmxM.20.0090	1.58393	0.000179098	Up	126.88	16.3	14	14	14	90520	80385	82014	51108	48058	46861	58274	55934	59121	83741	79122	80389	67301	70180	67243	70152	74638	85181	1.30326	1.15734	1.18079	0.735825	0.691912	0.674679	0.838997	0.805307	0.851191	1.20566	1.13915	1.1574	0.968962	1.01041	0.968127	1.01001	1.0746	1.22639	plasma membrane	K04946	KCNT1, KNA1.1; potassium channel subfamily T member 1
LmxM.36.2180	protein-tyrosine phosphatase 1-like protein OS=Leishmania_mexicana_MHOM/GT/2001/U1103 GN=LmxM.36.2180	LmxM.36.2180	1.68091	0.000179169	Up	56.895	22.4	7	7	7	96333	89247	93574	49961	46589	54947	55622	60437	64591	65499	85079	73542	61308	62696	66350	86924	98326	94692	1.328	1.23032	1.28997	0.688739	0.642254	0.757473	0.766779	0.833156	0.890421	0.902938	1.17286	1.01382	0.845163	0.864298	0.91467	1.19829	1.35548	1.30538	nucleus	K07293	PTPN11; tyrosine-protein phosphatase non-receptor type 11 [EC:3.1.3.48]
LmxM.27.1440	Snf7, putative OS=Leishmania_mexicana_MHOM/GT/2001/U1103 GN=LmxM.27.1440	LmxM.27.1440	1.51123	0.000183584	Up	25.351	33.5	7	7	7	403550	375680	384870	224070	225910	235880	275590	290130	289020	300950	294710	278700	258500	259910	244030	263780	269240	290760	1.40629	1.30917	1.3412	0.780841	0.787253	0.821996	0.960378	1.01105	1.00718	1.04875	1.02701	0.971216	0.900822	0.905736	0.850397	0.919222	0.938249	1.01324	nucleus	K12191	CHMP2A; charged multivesicular body protein 2A
LmxM.05.0270	hypothetical protein, conserved OS=Leishmania_mexicana_MHOM/GT/2001/U1103 GN=LmxM.05.0270	LmxM.05.0270	1.58529	0.000192454	Up	35.008	36.3	6	5	6	451720	439820	405350	243540	249040	226700	293770	304380	318730	481620	500570	489110	508710	493660	500130	362910	393780	406870	1.15	1.1197	1.03195	0.620009	0.634011	0.577138	0.747886	0.774897	0.81143	1.22612	1.27436	1.24519	1.29508	1.25677	1.27324	0.923904	1.00249	1.03582	nucleus
LmxM.28.2020	hypothetical protein, conserved OS=Leishmania_mexicana_MHOM/GT/2001/U1103 GN=LmxM.28.2020	LmxM.28.2020	1.55691	0.000197186	Up	64.766	12.1	5	5	5	45981	47284	45269	26331	33464	29688	31564	25754	31159	34145	37266	38913	33483	38481	38149	26230	24026	27937	1.34551	1.38364	1.32468	0.770508	0.979237	0.868742	0.923638	0.753624	0.911787	0.999164	1.09049	1.13869	0.979793	1.12605	1.11633	0.767553	0.703058	0.817503	nucleus
LmxM.22.1230	hypothetical protein, conserved OS=Leishmania_mexicana_MHOM/GT/2001/U1103 GN=LmxM.22.1230	LmxM.22.1230	1.52067	0.000227823	Up	101.8	15.2	11	11	11	155410	149850	146650	89571	87266	100870	105080	114280	97290	88907	80633	58766	86659	72481	82582	206730	193130	215170	1.31251	1.26555	1.23853	0.756467	0.737001	0.851893	0.887448	0.965146	0.821658	0.75086	0.680982	0.496305	0.731874	0.612135	0.697442	1.74593	1.63107	1.81721	mitochondria
LmxM.05.0200	50S ribosome-binding GTPase, putative OS=Leishmania_mexicana_MHOM/GT/2001/U1103 GN=LmxM.05.0200	LmxM.05.0200	2.38908	0.000270677	Up	88.57	15.5	10	10	10	267890	311130	241700	86597	95275	80278	137900	146180	140830	305160	291010	272730	219850	197900	202800	200720	179630	198400	1.34845	1.5661	1.21662	0.435893	0.479575	0.404086	0.694131	0.735809	0.70888	1.53605	1.46482	1.37281	1.10663	0.996147	1.02081	1.01034	0.904183	0.998663	nucleus	K14539	LSG1; large subunit GTPase 1 [EC:3.6.1.-]
LmxM.06.0890	hypothetical protein, conserved OS=Leishmania_mexicana_MHOM/GT/2001/U1103 GN=LmxM.06.0890	LmxM.06.0890	1.50284	0.00028597	Up	78.053	15.3	7	7	7	44664	47531	43393	30615	26121	28463	28448	34018	32777	31616	30229	34058	42090	39068	33871	32858	33564	33179	1.28311	1.36548	1.2466	0.879513	0.750408	0.81769	0.817259	0.977274	0.941623	0.908269	0.868423	0.978424	1.20917	1.12235	0.973051	0.94395	0.964232	0.953172	cytoplasm
LmxM.27.0250	flap endonuclease-1 (FEN-1), putative OS=Leishmania_mexicana_MHOM/GT/2001/U1103 GN=LmxM.27.0250	LmxM.27.0250	1.55511	0.000329486	Up	44.203	30.9	10	10	10	170830	195180	196830	112890	108260	116270	115110	143050	128280	149170	153720	162490	128060	129680	133000	164560	165000	200670	1.15035	1.31432	1.32543	0.760188	0.72901	0.782948	0.775137	0.963282	0.863822	1.00449	1.03513	1.09419	0.862341	0.87325	0.895606	1.10813	1.11109	1.35129	nucleus	K04799	FEN1, RAD2; flap endonuclease-1 [EC:3.1.-.-]
LmxM.08_29.1390	RNA binding protein, putative OS=Leishmania_mexicana_MHOM/GT/2001/U1103 GN=LmxM.08_29.1390	LmxM.08_29.1390	1.62969	0.000340178	Up	83.846	19.1	8	8	8	252680	246810	270010	147370	128460	153610	170750	160350	183810	244310	252480	224160	262110	252500	298510	229300	233100	168800	1.17249	1.14525	1.25291	0.68383	0.596084	0.712785	0.792319	0.744061	0.85292	1.13365	1.17156	1.04015	1.21625	1.17166	1.38515	1.064	1.08164	0.78327	nucleus	K13208	ELAVL2_3_4; ELAV like protein 2/3/4
LmxM.27.1840	Dual specificity phosphatase, catalytic domain containing protein, putative OS=Leishmania_mexicana_MHOM/GT/2001/U1103 GN=LmxM.27.1840	LmxM.27.1840	1.55076	0.000341701	Up	180.23	25.8	26	26	26	217260	214960	216740	130940	122620	118460	152920	155590	156430	146180	146800	135940	147080	148790	148080	163250	165950	165760	1.37037	1.35586	1.36709	0.825903	0.773424	0.747185	0.964541	0.981382	0.986681	0.922029	0.92594	0.85744	0.927706	0.938491	0.934013	1.0297	1.04673	1.04553	nucleus	K21278	DUSP1; dual specificity protein phosphatase 1 [EC:3.1.3.16 3.1.3.48]
LmxM.16.1110	Polyketide cyclase / dehydrase and lipid transport, putative OS=Leishmania_mexicana_MHOM/GT/2001/U1103 GN=LmxM.16.1110	LmxM.16.1110	1.7056	0.000360021	Up	38.961	25.1	6	6	6	412230	354570	300890	195720	186610	191250	217770	227850	232780	515950	429540	464070	430180	444000	380880	99546	264610	268460	1.32104	1.13626	0.964235	0.627207	0.598013	0.612882	0.697868	0.730171	0.745969	1.65342	1.37651	1.48716	1.37856	1.42285	1.22057	0.319006	0.847972	0.86031	mitochondria	K18588	COQ10; coenzyme Q-binding protein COQ10
LmxM.36.3390	ribosomal protein L29, putative OS=Leishmania_mexicana_MHOM/GT/2001/U1103 GN=LmxM.36.3390	LmxM.36.3390	3.76029	0.000426624	Up	7.9771	32.9	3	3	3	315880	262170	310330	79011	78491	0	0	0	0	1165700	2177800	2136300	359790	394070	389090	124630	128440	130510	0.549206	0.455823	0.539556	0.137373	0.136469					2.02675	3.78644	3.71428	0.62555	0.685151	0.676492	0.216688	0.223313	0.226912	nucleus	K02905	RP-L29e, RPL29; large subunit ribosomal protein L29e
LmxM.04.0990	hypothetical protein, conserved OS=Leishmania_mexicana_MHOM/GT/2001/U1103 GN=LmxM.04.0990	LmxM.04.0990	3.42048	0.000435376	Up	31.795	26.7	6	6	6	411990	408990	410680	80954	80845	78418	176300	166160	137490	447330	441500	443890	234420	181410	183810	343920	355680	345710	1.50438	1.49342	1.49959	0.295603	0.295205	0.286342	0.643757	0.606731	0.502043	1.63342	1.61213	1.62086	0.855982	0.662416	0.67118	1.25582	1.29876	1.26236	nucleus
LmxM.36.0900	SNF1-related protein kinases, putative (fragment) OS=Leishmania_mexicana_MHOM/GT/2001/U1103 GN=LmxM.36.0900	LmxM.36.0900	1.52196	0.00045127	Up	54.909	35.8	11	11	11	370460	397630	392410	221580	211480	231820	278750	286970	294410	321140	309040	317730	312330	329820	329940	370590	387670	383620	1.16023	1.24532	1.22897	0.693957	0.662325	0.726027	0.873005	0.898749	0.92205	1.00576	0.967869	0.995085	0.978173	1.03295	1.03332	1.16063	1.21413	1.20144	nucleus	K07198	PRKAA, AMPK; 5'-AMP-activated protein kinase, catalytic alpha subunit [EC:2.7.11.11]
LmxM.16.0850	COP9 signalosome complex subunit 5, putative OS=Leishmania_mexicana_MHOM/GT/2001/U1103 GN=LmxM.16.0850	LmxM.16.0850	1.6195	0.000461647	Up	51.479	8.1	3	3	3	39255	38288	37373	23011	24969	20203	27620	22460	0	33862	38732	32974	36399	34380	29564	51681	41588	43219	1.15942	1.13086	1.10383	0.679642	0.737473	0.596706	0.815771	0.663368		1.00013	1.14397	0.973904	1.07506	1.01543	0.873188	1.52643	1.22832	1.2765	nucleus	K09613	COPS5, CSN5; COP9 signalosome complex subunit 5 [EC:3.4.-.-]
LmxM.27.0490	calpain-like cysteine peptidase, putative OS=Leishmania_mexicana_MHOM/GT/2001/U1103 GN=LmxM.27.0490	LmxM.27.0490	2.61479	0.000481479	Up	269.06	47.3	68	53	56	1442600	1365200	1417400	400320	380590	387930	703440	690750	668740	800000	809550	797690	1007900	1021800	1033700	1603100	1520100	1563300	1.4742	1.39511	1.44845	0.40909	0.388928	0.396429	0.718851	0.705883	0.683391	0.817526	0.827286	0.815166	1.02998	1.04419	1.05635	1.63822	1.5534	1.59755	nucleus	K08585	CAPNN; calpain, invertebrate [EC:3.4.22.-]
LmxM.36.2370	base J-associated glucosyltransferase OS=Leishmania_mexicana_MHOM/GT/2001/U1103 GN=LmxM.36.2370	LmxM.36.2370	1.5156	0.00049695	Up	103	23.6	15	15	15	105810	106590	99990	62896	65528	58717	75567	70301	79223	107420	105600	111200	89236	85550	83606	79320	79114	83510	1.22941	1.23848	1.16179	0.730793	0.761374	0.682237	0.878018	0.816832	0.920497	1.24812	1.22697	1.29204	1.03684	0.994011	0.971424	0.921624	0.919231	0.970308	plasma membrane
LmxM.28.1830	DNA repair protein-like protein OS=Leishmania_mexicana_MHOM/GT/2001/U1103 GN=LmxM.28.1830	LmxM.28.1830	1.69338	0.000544027	Up	99.606	9.2	7	7	7	38734	35470	38262	0	0	0	20328	22417	23670	26865	28734	27128	21117	22269	23518	51250	54954	57600	1.18016	1.08071	1.16578				0.619358	0.683006	0.721183	0.818529	0.875474	0.826542	0.643398	0.678497	0.716552	1.5615	1.67435	1.75497	nucleus	K15711	SMARCA3, HLTF; SWI/SNF-related matrix-associated actin-dependent regulator of chromatin subfamily A3 [EC:5.6.2. 2.3.2.27]
LmxM.26.0880	40S ribosomal protein S16, putative OS=Leishmania_mexicana_MHOM/GT/2001/U1103 GN=LmxM.26.0880	LmxM.26.0880	1.77127	0.000571139	Up	16.673	73.2	14	14	14	4835300	4938400	4927100	2314000	2272800	2309200	3212800	3249500	3240900	5202300	5307800	5329900	3857600	3775600	3626400	3270400	3400200	3244900	1.27403	1.30119	1.29822	0.609704	0.598849	0.608439	0.846524	0.856194	0.853928	1.37073	1.39853	1.40435	1.01642	0.994814	0.955502	0.861701	0.895901	0.854982	cytoplasm	K02960	RP-S16e, RPS16; small subunit ribosomal protein S16e
LmxM.29.1450	kinesin, putative OS=Leishmania_mexicana_MHOM/GT/2001/U1103 GN=LmxM.29.1450	LmxM.29.1450	1.55238	0.000580432	Up	133.7	20.9	17	17	17	208700	211740	210470	117720	116110	120210	156130	148850	153810	167850	178320	161580	158690	159550	169470	90131	92587	92955	1.38371	1.40387	1.39545	0.780501	0.769826	0.79701	1.03516	0.986897	1.01978	1.11287	1.18229	1.0713	1.05214	1.05784	1.12361	0.597582	0.613865	0.616305	nucleus	K20196	KIF3B; kinesin family member 3B
LmxM.27.1730	Flabarin, putative OS=Leishmania_mexicana_MHOM/GT/2001/U1103 GN=LmxM.27.1730	LmxM.27.1730	1.9283	0.000592175	Up	37.788	55.9	18	18	18	1809500	1759700	1758400	735200	727620	758590	1139200	1075300	1089800	1093200	1042200	1079700	1148700	1180700	1149800	811360	742330	758640	1.64004	1.5949	1.59372	0.666346	0.659476	0.687546	1.03251	0.974595	0.987737	0.990819	0.944595	0.978583	1.04112	1.07012	1.04212	0.735374	0.672809	0.687591	cytoplasm
LmxM.21.0825	conserved hypothetical protein OS=Leishmania_mexicana_MHOM/GT/2001/U1103 GN=LmxM.21.0825	LmxM.21.0825	1.59232	0.000606477	Up	359.36	31.5	49	49	49	704600	702640	694310	377130	390980	370780	499760	486400	514560	461930	469060	489950	608340	587690	595890	481720	548350	487850	1.33899	1.33526	1.31943	0.716679	0.742999	0.704612	0.949719	0.92433	0.977844	0.877829	0.891378	0.931076	1.15606	1.11682	1.1324	0.915437	1.04206	0.927086	nucleus
LmxM.25.0570	Tyrosine phosphatase family, putative OS=Leishmania_mexicana_MHOM/GT/2001/U1103 GN=LmxM.25.0570	LmxM.25.0570	1.62772	0.000635237	Up	35.188	19	7	7	7	238060	209020	226080	146770	152110	133960	112200	122680	159400	184740	141990	299580	184540	179280	165290	137240	206600	202320	1.33831	1.17505	1.27096	0.825102	0.855122	0.753087	0.630758	0.689674	0.896104	1.03856	0.79823	1.68416	1.03743	1.00786	0.929216	0.771527	1.16145	1.13739	cytoplasm
LmxM.16.1650	Clustered mitochondria, putative OS=Leishmania_mexicana_MHOM/GT/2001/U1103 GN=LmxM.16.1650	LmxM.16.1650	2.30932	0.000637652	Up	76.621	25.4	12	12	12	128840	126010	124200	41403	36324	46827	65423	69575	68727	98049	105650	98488	111130	102620	100920	117560	118100	117270	1.3828	1.35243	1.333	0.444366	0.389855	0.502581	0.702166	0.746728	0.737627	1.05233	1.13391	1.05704	1.19273	1.10139	1.08315	1.26174	1.26753	1.25862	mitochondria
LmxM.07.0860	hypothetical protein, unknown function OS=Leishmania_mexicana_MHOM/GT/2001/U1103 GN=LmxM.07.0860	LmxM.07.0860	1.65197	0.00066505	Up	149.07	12.7	10	9	10	608650	689610	826240	403620	413910	386350	483540	491690	392970	753120	688420	782180	554160	628660	656690	384230	484360	269060	1.10692	1.25416	1.50264	0.734043	0.752757	0.702635	0.879389	0.894211	0.714674	1.36966	1.25199	1.42251	1.00782	1.14331	1.19429	0.698779	0.880881	0.489326	mitochondria,nucleus
LmxM.13.0630	hypothetical protein, conserved OS=Leishmania_mexicana_MHOM/GT/2001/U1103 GN=LmxM.13.0630	LmxM.13.0630	1.81642	0.000689977	Up	31.671	25.4	5	5	5	86726	86764	79992	34797	44514	41963	52569	48583	56674	76137	72291	71351	63507	50664	62774	82163	69392	77272	1.34792	1.34851	1.24326	0.540824	0.691848	0.6522	0.817041	0.755089	0.880842	1.18334	1.12357	1.10896	0.987042	0.787433	0.97565	1.277	1.07851	1.20098	nucleus
LmxM.24.1430	kinesin, putative OS=Leishmania_mexicana_MHOM/GT/2001/U1103 GN=LmxM.24.1430	LmxM.24.1430	2.1076	0.000690038	Up	343.31	3.9	7	7	7	1518600	1441600	1334600	930720	776080	795500	581900	437160	554170	1123200	880970	1299800	856920	680830	828710	737930	800780	800610	1.66878	1.58417	1.46659	1.02276	0.852831	0.874172	0.639447	0.480393	0.608975	1.23428	0.968094	1.42834	0.941666	0.748161	0.910666	0.810908	0.879974	0.879787	nucleus	K10406	KIFC2_3; kinesin family member C2/C3
LmxM.27.0390	autophagy protein APG9, putative OS=Leishmania_mexicana_MHOM/GT/2001/U1103 GN=LmxM.27.0390	LmxM.27.0390	1.54449	0.000690437	Up	80.97	15.9	8	8	8	58700	57013	61048	32409	30935	35891	41210	46512	41935	32820	33513	31417	38394	37341	39740	24094	26823	23308	1.52445	1.48064	1.58543	0.841667	0.803387	0.932095	1.07023	1.20792	1.08906	0.852341	0.870338	0.815905	0.997099	0.969752	1.03205	0.625725	0.696598	0.605313	plasma membrane
LmxM.05.0230	hydrogenase, putative OS=Leishmania_mexicana_MHOM/GT/2001/U1103 GN=LmxM.05.0230	LmxM.05.0230	1.5223	0.000754009	Up	66.229	21.7	7	7	7	79171	70653	66768	52676	48138	38012	48341	47736	49656	75154	64631	62206	67223	67011	64471	56629	49301	52705	1.3438	1.19922	1.13328	0.894092	0.817066	0.645193	0.820512	0.810243	0.842832	1.27562	1.09701	1.05585	1.141	1.13741	1.09429	0.961187	0.836806	0.894584	nucleus
LmxM.13.0700	kinesin, putative OS=Leishmania_mexicana_MHOM/GT/2001/U1103 GN=LmxM.13.0700	LmxM.13.0700	1.80884	0.000755788	Up	151.31	4.5	4	4	4	0	562510	645730	311540	358920	0	0	343790	321680	0	0	0	374950	465680	390350	488490	380740	365830		1.34727	1.54659	0.746172	0.859653			0.823415	0.770459				0.898046	1.11535	0.934931	1.16999	0.911914	0.876203	nucleus	K18627	KIF25; kinesin family member 25
LmxM.08_29.0020	transcription factor-like protein OS=Leishmania_mexicana_MHOM/GT/2001/U1103 GN=LmxM.08_29.0020	LmxM.08_29.0020	1.51315	0.000766534	Up	114.94	48.9	41	41	41	357560	351420	345400	198360	199900	206080	259020	268000	262260	402820	394920	403420	244910	244270	242570	535080	532710	549120	1.07307	1.05464	1.03658	0.595296	0.599918	0.618465	0.777342	0.804292	0.787066	1.2089	1.18519	1.2107	0.734997	0.733076	0.727974	1.60582	1.59871	1.64796	mitochondria	K25639	SUPT16H, SPT16; FACT complex subunit SPT16
LmxM.05.0760	kinesin-like protein OS=Leishmania_mexicana_MHOM/GT/2001/U1103 GN=LmxM.05.0760	LmxM.05.0760	2.64672	0.000826272	Up	153.51	19.9	22	22	22	311320	299130	313540	83383	80648	76513	157170	141960	158540	271910	240360	251720	323280	314820	320040	545990	576480	574140	1.11165	1.06812	1.11958	0.297741	0.287975	0.27321	0.561216	0.506905	0.566108	0.970925	0.858268	0.898832	1.15436	1.12415	1.14279	1.9496	2.05847	2.05012	nucleus	K20198	KIF17; kinesin family member 17
LmxM.36.3080	Octanoyltransferase, putative OS=Leishmania_mexicana_MHOM/GT/2001/U1103 GN=LmxM.36.3080	LmxM.36.3080	1.51493	0.000854277	Up	29.367	17	3	3	3	67183	67727	61853	37636	35975	37501	51132	51396	46125	58927	54861	54008	56249	55816	51725	84319	84941	77314	1.16875	1.17822	1.07603	0.654737	0.625841	0.652388	0.88952	0.894113	0.802416	1.02513	0.954392	0.939553	0.978538	0.971006	0.899836	1.46686	1.47768	1.345	cytoplasm	K23735	LIPT2, LIP2; lipoyl(octanoyl) transferase 2 [EC:2.3.1.181]
LmxM.34.5070	hypothetical protein, conserved OS=Leishmania_mexicana_MHOM/GT/2001/U1103 GN=LmxM.34.5070	LmxM.34.5070	2.06739	0.000859859	Up	19.208	29.8	4	4	4	85537	83768	84368	32359	34552	28264	47511	50813	51905	89622	84573	90165	51466	51421	51907	79592	81827	81101	1.32644	1.29901	1.30831	0.501798	0.535805	0.438296	0.736763	0.787967	0.804901	1.38979	1.31149	1.39821	0.798094	0.797396	0.804932	1.23425	1.26891	1.25765	cytoplasm,nucleus
LmxM.27.0820	parallel beta-helix repeat, putative OS=Leishmania_mexicana_MHOM/GT/2001/U1103 GN=LmxM.27.0820	LmxM.27.0820	1.77891	0.000912549	Up	347.53	32.6	69	69	69	410310	407150	407950	187290	187320	185330	269370	269430	278970	208450	214330	211480	314040	318230	315580	397190	394610	385840	1.37717	1.36656	1.36925	0.628622	0.628723	0.622044	0.904117	0.904318	0.936338	0.699644	0.71938	0.709814	1.05405	1.06811	1.05922	1.33313	1.32447	1.29504	nucleus
LmxM.14.0140	histone acetyltransferase, putative OS=Leishmania_mexicana_MHOM/GT/2001/U1103 GN=LmxM.14.0140	LmxM.14.0140	2.56888	0.000918896	Up	57.776	4.2	2	2	2	327640	569690	328130	186680	176520	195020	142870	128160	124830	505730	443500	431470	136570	133600	163020	136960	203670	139190	1.3184	2.29239	1.32037	0.751185	0.710302	0.784745	0.574897	0.515706	0.502306	2.03502	1.78461	1.7362	0.549547	0.537596	0.655979	0.551116	0.819552	0.560089	mitochondria	K11304	TIP60, KAT5, ESA1; histone acetyltransferase HTATIP [EC:2.3.1.48]
LmxM.29.1010	ubiquitin fusion degradation protein 2, putative OS=Leishmania_mexicana_MHOM/GT/2001/U1103 GN=LmxM.29.1010	LmxM.29.1010	1.54476	0.000947712	Up	114.74	31.9	23	23	23	293200	261640	257170	144050	149870	151070	212030	197020	197270	340270	361470	355110	224030	218230	206830	332240	323510	302760	1.16561	1.04014	1.02237	0.572666	0.595803	0.600574	0.842918	0.783246	0.78424	1.35273	1.43701	1.41173	0.890624	0.867566	0.822246	1.32081	1.2861	1.20361	cytoplasm	K03671	trxA; thioredoxin 1
LmxM.17.0800	OSM3-like kinesin, putative OS=Leishmania_mexicana_MHOM/GT/2001/U1103 GN=LmxM.17.0800	LmxM.17.0800	2.2522	0.00100921	Up	104.79	30	21	20	20	308670	329940	310140	101070	116330	91891	179070	193120	161030	223360	231090	218470	317550	302750	311180	277450	263150	252730	1.32635	1.41774	1.33266	0.434296	0.499867	0.394854	0.76946	0.829832	0.691942	0.959773	0.992989	0.938761	1.36451	1.30091	1.33713	1.1922	1.13075	1.08598	nucleus	K10394	KIF3A; kinesin family member 3A
LmxM.13.1320	hypothetical protein, conserved OS=Leishmania_mexicana_MHOM/GT/2001/U1103 GN=LmxM.13.1320	LmxM.13.1320	2.35349	0.00108917	Up	51.668	26.9	6	6	6	339050	334180	308880	0	0	0	114060	158920	144320	181410	164180	144710	354570	345910	352600	263950	224670	215980	1.39435	1.37433	1.27028				0.469075	0.653563	0.59352	0.746054	0.675195	0.595124	1.45818	1.42257	1.45008	1.0855	0.923962	0.888224	extracellular
LmxM.31.2380	aquaporin-like protein OS=Leishmania_mexicana_MHOM/GT/2001/U1103 GN=LmxM.31.2380	LmxM.31.2380	2.29097	0.00109834	Up	62.926	7.4	3	3	3	237680	217680	181350	73094	65120	80670	104720	109030	123210	163220	178460	152950	88106	130620	106690	289330	185910	246610	1.56457	1.43292	1.19377	0.481154	0.428664	0.531025	0.689338	0.717709	0.811052	1.07442	1.17474	1.00682	0.579973	0.859829	0.702306	1.90457	1.22379	1.62335	plasma membrane	K09869	AQP8; aquaporin-8
LmxM.19.0160	metallo-peptidase, Clan MG, Family M24 OS=Leishmania_mexicana_MHOM/GT/2001/U1103 GN=LmxM.19.0160	LmxM.19.0160	1.86656	0.00115756	Up	42.47	53.4	21	21	21	851640	849210	850430	359880	359120	355070	553720	559360	546520	1381200	1356500	1375000	659800	661860	647330	943320	926150	925320	1.08248	1.0794	1.08095	0.457428	0.456462	0.451315	0.70381	0.710979	0.694659	1.75559	1.72419	1.7477	0.838644	0.841262	0.822794	1.19901	1.17719	1.17614	cytoplasm
LmxM.08_29.0868	cytochrome b5-like Heme/Steroid binding domain containing protein, putative OS=Leishmania_mexicana_MHOM/GT/2001/U1103 GN=LmxM.08_29.0868	LmxM.08_29.0868	2.03745	0.00119046	Up	18.792	50.6	4	4	4	54404	61861	54179	23778	21805	27693	37098	29052	0	53289	59304	52040	73139	60244	52035	56318	51675	60842	1.11597	1.26893	1.11136	0.48775	0.447279	0.568057	0.760979	0.595934		1.0931	1.21648	1.06748	1.50028	1.23577	1.06738	1.15523	1.05999	1.24803	cytoplasm,nucleus	K19703	FA2H, SCS7; 4-hydroxysphinganine ceramide fatty acyl 2-hydroxylase [EC:1.14.18.6]
LmxM.33.2150	eukaryotic translation initiation factor 2-alpha kinase 2 OS=Leishmania_mexicana_MHOM/GT/2001/U1103 GN=LmxM.33.2150	LmxM.33.2150	1.85998	0.0012017	Up	159.43	10.1	10	10	10	138990	135960	130030	58141	51392	61711	90731	91821	81672	131300	135220	130930	100570	108930	98529	144890	141270	144960	1.26543	1.23785	1.18386	0.529344	0.467898	0.561847	0.826059	0.835983	0.743582	1.19542	1.23111	1.19205	0.915638	0.991752	0.897056	1.31915	1.28619	1.31979	plasma membrane	K16195	EIF2AK2; eukaryotic translation initiation factor 2-alpha kinase 2 [EC:2.7.11.1]
LmxM.01.0380	Dyggve-Melchior-Clausen syndrome protein, putative OS=Leishmania_mexicana_MHOM/GT/2001/U1103 GN=LmxM.01.0380	LmxM.01.0380	1.52561	0.00123621	Up	88.188	17.4	9	9	9	155160	114160	118830	86645	75619	78611	92843	83681	91447	132750	142570	150050	153350	88296	94473	224040	183620	215210	1.22422	0.900728	0.937574	0.683633	0.596638	0.620245	0.732536	0.660247	0.721521	1.0474	1.12488	1.1839	1.20994	0.69666	0.745396	1.76769	1.44877	1.69802	plasma membrane
LmxM.12.0710	Protein of unknown function (DUF962), putative OS=Leishmania_mexicana_MHOM/GT/2001/U1103 GN=LmxM.12.0710	LmxM.12.0710	1.73814	0.00125769	Up	11.742	28.7	3	3	3	595200	609860	597150	327550	318030	293450	490030	321060	323600	466410	545890	432670	355730	360290	330170	1008200	943950	867070	1.16626	1.19498	1.17008	0.641814	0.62316	0.574997	0.960183	0.629097	0.634074	0.913901	1.06964	0.84779	0.697031	0.705966	0.646947	1.9755	1.84961	1.69897	extracellular
LmxM.19.1130	hypothetical protein, conserved OS=Leishmania_mexicana_MHOM/GT/2001/U1103 GN=LmxM.19.1130	LmxM.19.1130	1.58144	0.00129918	Up	614.9	10.8	36	35	36	203130	211370	206150	160230	128510	136160	103460	117130	139430	204460	189840	191150	189170	193940	202210	176690	176010	174220	1.17823	1.22602	1.19574	0.92939	0.745403	0.789776	0.600104	0.679395	0.808743	1.18594	1.10114	1.10874	1.09725	1.12492	1.17289	1.02486	1.02092	1.01054	plasma membrane
LmxM.14.1440	cytoskeleton associated protein, putative OS=Leishmania_mexicana_MHOM/GT/2001/U1103 GN=LmxM.14.1440	LmxM.14.1440	1.64028	0.00131861	Up	108.73	39.2	28	28	28	1052900	1101600	1084200	539220	528500	554000	764460	799230	763540	1029900	1044000	1018900	810830	811000	807730	1231900	1244700	1220500	1.15512	1.20855	1.18946	0.59157	0.57981	0.607785	0.838678	0.876824	0.837669	1.12989	1.14536	1.11782	0.88955	0.889736	0.886149	1.3515	1.36554	1.33899	nucleus
LmxM.28.1910	p21-C-terminal region-binding protein, putative OS=Leishmania_mexicana_MHOM/GT/2001/U1103 GN=LmxM.28.1910	LmxM.28.1910	2.63017	0.001437	Up	71.833	23.4	11	11	11	460900	421700	410730	136760	91361	99377	190290	233360	232310	484030	454240	425430	370190	312570	333540	678760	685870	615850	1.24994	1.14363	1.11388	0.370888	0.247767	0.269506	0.516059	0.632863	0.630015	1.31267	1.23188	1.15375	1.00394	0.847677	0.904547	1.84077	1.86005	1.67016	nucleus
LmxM.14.1100	kinesin K39, putative OS=Leishmania_mexicana_MHOM/GT/2001/U1103 GN=LmxM.14.1100	LmxM.14.1100	2.766	0.00145244	Up	536.11	26.4	22	10	11	612120	601760	593480	133370	126960	157150	288770	310750	289840	327210	310410	348140	409750	408350	397510	223460	249490	217820	1.83442	1.80337	1.77856	0.399688	0.380478	0.470952	0.865396	0.931266	0.868602	0.980594	0.930247	1.04332	1.22795	1.22376	1.19127	0.669672	0.74768	0.65277	nucleus	K17914	KIF13; kinesin family member 13
LmxM.26.1160	RNA pseudouridylate synthase, putative OS=Leishmania_mexicana_MHOM/GT/2001/U1103 GN=LmxM.26.1160	LmxM.26.1160	2.04852	0.00150858	Up	103.1	9.9	5	5	5	992060	747660	690280	419650	0	0	336360	395200	430420	388200	376700	0	301460	321410	269280	0	0	0	2.10009	1.58272	1.46125	0.888355			0.712039	0.836597	0.911154	0.821779	0.797434		0.638159	0.680391	0.570037				nucleus	K20456	OSBP; oxysterol-binding protein 1
LmxM.33.0190	Domain of unknown function (DUF1935), putative OS=Leishmania_mexicana_MHOM/GT/2001/U1103 GN=LmxM.33.0190	LmxM.33.0190	1.60469	0.00154912	Up	55.984	57	21	21	21	1202100	1383000	1349100	668790	656770	662360	981300	963780	970380	1227800	1251100	1254700	1546600	1493400	1451300	2561000	2534100	2555600	0.875557	1.00732	0.982625	0.487117	0.478363	0.482434	0.714736	0.701975	0.706782	0.894276	0.911247	0.913869	1.12648	1.08773	1.05706	1.86532	1.84573	1.86139	cytoplasm
LmxM.05.0660	nitroreductase-like protein OS=Leishmania_mexicana_MHOM/GT/2001/U1103 GN=LmxM.05.0660	LmxM.05.0660	1.76553	0.00155127	Up	34.019	39	8	8	8	100210	104470	80120	39986	54566	51856	51771	67046	57397	75681	75874	73669	74559	59560	58171	100700	81432	84968	1.39608	1.45542	1.11619	0.557065	0.760186	0.722432	0.721248	0.934051	0.799626	1.05435	1.05704	1.02632	1.03872	0.82976	0.810409	1.4029	1.13447	1.18373	mitochondria
LmxM.26.0050	hypothetical protein, conserved OS=Leishmania_mexicana_MHOM/GT/2001/U1103 GN=LmxM.26.0050	LmxM.26.0050	1.85441	0.0016091	Up	28.597	18	3	3	3	106960	80412	68627	56174	45128	51120	40049	37775	45851	77926	92452	99375	52235	66431	48314	44513	63041	55501	1.70095	1.27877	1.09135	0.893318	0.717657	0.812945	0.636887	0.600724	0.729154	1.23923	1.47024	1.58033	0.830677	1.05643	0.768323	0.707876	1.00252	0.882615	nucleus
LmxM.23.0110	mannose-1-phosphate guanyltransferase OS=Leishmania_mexicana_MHOM/GT/2001/U1103 GN=LmxM.23.0110	LmxM.23.0110	1.60134	0.00168504	Up	41.476	70.2	26	26	26	2551800	2558100	2655900	1321700	1342100	1312600	1882000	1931500	1909200	2239600	2233300	2197700	2339800	2324400	2289900	6197300	6025600	5988600	0.931671	0.933971	0.969678	0.482557	0.490005	0.479235	0.687125	0.705197	0.697055	0.817686	0.815385	0.802388	0.854269	0.848646	0.83605	2.26266	2.19997	2.18646	cytoplasm	K00966	GMPP; mannose-1-phosphate guanylyltransferase [EC:2.7.7.13]
LmxM.13.1180	dynein light chain Tctex-type, putative OS=Leishmania_mexicana_MHOM/GT/2001/U1103 GN=LmxM.13.1180	LmxM.13.1180	1.51101	0.00169109	Up	13.391	50.8	4	4	4	321330	322260	310460	189130	198000	156690	242330	242790	233860	224170	217780	133240	225700	229330	227530	249080	241770	255250	1.37037	1.37434	1.32402	0.806582	0.84441	0.668235	1.03346	1.03543	0.997342	0.956017	0.928765	0.568228	0.962542	0.978023	0.970346	1.06225	1.03108	1.08856	cytoplasm	K10420	DYNLT1_3; dynein light chain Tctex-type 1/3
LmxM.11.0070	GRIP domain containing protein, putative OS=Leishmania_mexicana_MHOM/GT/2001/U1103 GN=LmxM.11.0070	LmxM.11.0070	2.09319	0.00176614	Up	174.4	36.7	14	14	14	314240	289300	250020	132470	111790	88598	162600	150640	169460	135860	119250	137380	297570	302710	302130	418650	326990	194760	1.4487	1.33372	1.15263	0.610708	0.51537	0.408451	0.749612	0.694475	0.781238	0.626337	0.549762	0.633344	1.37185	1.39554	1.39287	1.93004	1.50748	0.897875	cytoplasm
LmxM.09.0410	kinetoplastid kinetochore protein 19, putative OS=Leishmania_mexicana_MHOM/GT/2001/U1103 GN=LmxM.09.0410	LmxM.09.0410	1.81012	0.00182469	Up	47.8	31.2	11	2	2	157650	137210	131890	94035	58551	61765	88924	83388	84854	149770	133100	136960	105820	94186	92476	42269	50576	41388	1.62636	1.4155	1.36062	0.970093	0.60403	0.637186	0.917366	0.860255	0.875379	1.54507	1.3731	1.41292	1.09167	0.971651	0.95401	0.43606	0.521757	0.426971	nucleus	K08823	CLK2_3; dual specificity protein kinase CLK2/3 [EC:2.7.12.1]
LmxM.34.0570	hypothetical protein, conserved OS=Leishmania_mexicana_MHOM/GT/2001/U1103 GN=LmxM.34.0570	LmxM.34.0570	1.65573	0.00186473	Up	224.8	6.3	8	8	8	35134	44223	46327	27260	27369	25973	19847	29190	22178	35920	31254	35786	35702	34528	33526	27998	19824	23026	1.13935	1.43409	1.50232	0.884005	0.887539	0.842269	0.643611	0.946592	0.719202	1.16484	1.01352	1.16049	1.15777	1.1197	1.0872	0.907937	0.642865	0.746702	plasma membrane
LmxM.22.0760	hypothetical protein, conserved OS=Leishmania_mexicana_MHOM/GT/2001/U1103 GN=LmxM.22.0760	LmxM.22.0760	1.64316	0.00187153	Up	13.737	70	5	5	5	275010	272660	350030	159600	162750	156120	218300	211270	184610	355850	335320	285150	221780	245840	267520	216140	222130	231560	1.13234	1.12266	1.44123	0.657145	0.670115	0.642816	0.898839	0.869893	0.760122	1.46519	1.38066	1.17409	0.913168	1.01223	1.1015	0.889945	0.914609	0.953436	mitochondria
LmxM.34.2620	TFIIF-stimulated CTD phosphatase, putative OS=Leishmania_mexicana_MHOM/GT/2001/U1103 GN=LmxM.34.2620	LmxM.34.2620	2.49723	0.00195201	Up	43.458	14.1	5	5	5	84215	89037	88876	31360	0	23654	41517	50418	27997	53578	0	57798	46628	48386	33987	65162	59668	71096	1.54279	1.63113	1.62818	0.574506		0.433334	0.760579	0.923642	0.512896	0.981533		1.05884	0.854211	0.886417	0.622631	1.19375	1.0931	1.30246	cytoplasm,nucleus	K15731	CTDSP; carboxy-terminal domain RNA polymerase II polypeptide A small phosphatase [EC:3.1.3.16]
LmxM.24.1780	fatty acid transporter protein-like protein OS=Leishmania_mexicana_MHOM/GT/2001/U1103 GN=LmxM.24.1780	LmxM.24.1780	1.79808	0.00210294	Up	145.19	16	15	15	15	150080	139230	130490	94393	101010	93506	58921	52601	66512	89790	91949	83784	125620	126270	125220	105280	101140	90202	1.47943	1.37248	1.28632	0.930491	0.995719	0.921747	0.580821	0.518521	0.65565	0.885116	0.906399	0.825911	1.23831	1.24472	1.23437	1.03781	0.997	0.889177	plasma membrane	K08745	SLC27A1_4, FATP1_4; solute carrier family 27 (fatty acid transporter), member 1/4 [EC:6.2.1.-]
LmxM.08_29.2600	poly(A) polymerase, putative OS=Leishmania_mexicana_MHOM/GT/2001/U1103 GN=LmxM.08_29.2600	LmxM.08_29.2600	1.67903	0.00232685	Up	55.296	8.6	4	4	4	30177	41982	37389	23546	18532	22957	23851	17031	24573	21154	30333	26748	22550	18581	18359	24460	22528	23723	1.21119	1.68499	1.50065	0.945045	0.743802	0.921405	0.957286	0.683558	0.986265	0.849039	1.21745	1.07356	0.905069	0.745769	0.736859	0.981729	0.904186	0.952149	cytoplasm	K14376	PAP; poly(A) polymerase [EC:2.7.7.19]
LmxM.05.1160	hypothetical protein, unknown function OS=Leishmania_mexicana_MHOM/GT/2001/U1103 GN=LmxM.05.1160	LmxM.05.1160	1.75746	0.00233702	Up	88.712	10.9	7	7	7	91498	76449	81944	59616	56296	49093	36736	37966	44670	102550	95542	95765	80764	78725	76660	54976	59119	59960	1.32999	1.11124	1.19111	0.866561	0.818303	0.713602	0.533984	0.551863	0.64931	1.49064	1.38877	1.39201	1.17396	1.14432	1.11431	0.799116	0.859337	0.871562	nucleus
LmxM.15.0440a	hypothetical protein OS=Leishmania_mexicana_MHOM/GT/2001/U1103 GN=LmxM.15.0440a	LmxM.15.0440a	11.1206	0.00240133	Up	93.542	62.7	31	28	31	403290	639060	398830	9106.3	3322.6	16034	78330	75721	76676	466090	469820	287030	498880	494830	308870	4257700	3547300	4956500	0.42733	0.677154	0.422604	0.00964912	0.00352066	0.0169898	0.0829992	0.0802347	0.0812466	0.493873	0.497826	0.30414	0.528618	0.524327	0.327282	4.5115	3.75875	5.25195	nucleus
LmxM.16.1000	Protein of unknown function (DUF3184), putative OS=Leishmania_mexicana_MHOM/GT/2001/U1103 GN=LmxM.16.1000	LmxM.16.1000	2.30573	0.00245352	Up	95.358	37.9	21	4	8	139130	112230	102970	31593	39425	46218	62248	64255	63608	74546	69957	83288	111460	102020	99801	323630	329270	319290	1.15145	0.928826	0.852189	0.261467	0.326285	0.382505	0.51517	0.53178	0.526426	0.61695	0.578971	0.689299	0.922453	0.844327	0.825962	2.67839	2.72507	2.64247	endoplasmic reticulum
LmxM.21.1370	hypothetical protein, unknown function OS=Leishmania_mexicana_MHOM/GT/2001/U1103 GN=LmxM.21.1370	LmxM.21.1370	1.61979	0.00252823	Up	111.22	16.6	11	11	11	48499	46864	46278	22986	25525	22813	31754	31170	40640	45101	43212	41966	47387	43126	47014	50942	51511	49826	1.18513	1.14518	1.13086	0.561689	0.623732	0.557462	0.775945	0.761674	0.993085	1.10209	1.05593	1.02549	1.15796	1.05383	1.14884	1.24483	1.25873	1.21755	plasma membrane
LmxM.05.1010	methyltransferase-like protein OS=Leishmania_mexicana_MHOM/GT/2001/U1103 GN=LmxM.05.1010	LmxM.05.1010	1.53547	0.00259234	Up	67.372	19.6	7	7	7	98497	140860	128680	79253	70525	75541	74594	89181	90286	108800	116320	107680	88987	61006	89884	88188	88134	101580	1.04414	1.49322	1.3641	0.84014	0.747617	0.80079	0.790751	0.945384	0.957098	1.15336	1.23308	1.14149	0.943327	0.646708	0.952836	0.934857	0.934285	1.07682	cytoplasm	K15430	TRM11, TRMT11; tRNA (guanine10-N2)-methyltransferase [EC:2.1.1.214]
LmxM.15.0520	ecotin, putative OS=Leishmania_mexicana_MHOM/GT/2001/U1103 GN=LmxM.15.0520	LmxM.15.0520	2.5048	0.0026326	Up	40.928	33.9	12	12	12	281810	304170	279310	72453	63440	76763	163810	156920	157520	235470	237960	252140	286650	289980	293880	398830	400570	405110	1.16429	1.25667	1.15397	0.299339	0.262101	0.317145	0.676779	0.648313	0.650792	0.972841	0.983128	1.04171	1.18429	1.19805	1.21416	1.64776	1.65495	1.67371	nucleus
LmxM.30.0390	Calpain-like protein 2 OS=Leishmania_mexicana_MHOM/GT/2001/U1103 GN=LmxM.30.0390	LmxM.30.0390	2.13614	0.00264644	Up	89.335	58.5	32	32	32	908030	874320	863150	285880	274620	282270	559290	545080	529760	662910	690860	681840	778070	758810	760810	1567600	1533800	1521700	1.16093	1.11783	1.10355	0.365503	0.351107	0.360887	0.715062	0.696895	0.677308	0.847542	0.883277	0.871745	0.994777	0.970152	0.972709	2.0042	1.96099	1.94552	cytoplasm	K08582	CAPN15; calpain-15 [EC:3.4.22.-]
LmxM.08_29.2180	Domain of unknown function (DUF4379), putative OS=Leishmania_mexicana_MHOM/GT/2001/U1103 GN=LmxM.08_29.2180	LmxM.08_29.2180	1.562	0.00273497	Up	49.508	9.7	3	3	3	123630	126530	110680	97058	64066	65865	71618	87232	76185	125850	101330	97182	91105	85707	89123	141530	104690	123850	1.24793	1.2772	1.11721	0.979707	0.646685	0.664844	0.722915	0.880523	0.769014	1.27033	1.02283	0.980959	0.919617	0.86513	0.899611	1.42861	1.05674	1.25015	nucleus
LmxM.19.1080	hypothetical protein, conserved OS=Leishmania_mexicana_MHOM/GT/2001/U1103 GN=LmxM.19.1080	LmxM.19.1080	2.02846	0.00285728	Up	400.8	1.9	4	4	4	319600	208290	206980	127640	127620	114290	0	0	113490	540600	346580	458600	208010	259190	259820	129360	0	177120	1.33271	0.868553	0.86309	0.532249	0.532165	0.47658			0.473244	2.25426	1.44521	1.91233	0.867385	1.0808	1.08343	0.539421		0.738576	plasma membrane
LmxM.27.1560	diacylglycerol acyltransferase, putative OS=Leishmania_mexicana_MHOM/GT/2001/U1103 GN=LmxM.27.1560	LmxM.27.1560	1.53678	0.00291041	Up	174.87	7.4	9	9	9	285700	373870	277490	249340	219900	187410	186410	189950	186500	372830	265580	293610	169840	182020	151690	216730	180120	190870	1.23033	1.61002	1.19497	1.07375	0.94697	0.807056	0.802749	0.817994	0.803137	1.60554	1.14368	1.26439	0.731393	0.783844	0.653232	0.933318	0.775662	0.821956	plasma membrane	K14458	MOGAT1, MGAT1; 2-acylglycerol O-acyltransferase 1 [EC:2.3.1.22]
LmxM.05.0590	ATP-dependent RNA helicase, putative OS=Leishmania_mexicana_MHOM/GT/2001/U1103 GN=LmxM.05.0590	LmxM.05.0590	1.5894	0.00291641	Up	105.27	30.7	16	16	16	364700	347890	369060	185380	173020	186710	270860	255490	289620	440760	436530	444330	374000	354990	366170	449880	486340	504050	1.04204	0.994006	1.05449	0.529676	0.49436	0.533476	0.773913	0.729997	0.827515	1.25936	1.24727	1.26956	1.06861	1.01429	1.04624	1.28542	1.38959	1.44019	nucleus	K12858	DDX23, PRP28; ATP-dependent RNA helicase DDX23/PRP28 [EC:3.6.4.13]
LmxM.34.4830	hypothetical protein, conserved OS=Leishmania_mexicana_MHOM/GT/2001/U1103 GN=LmxM.34.4830	LmxM.34.4830	1.97367	0.0032149	Up	44.325	14.4	4	4	4	473130	459520	415950	333230	304770	253020	162750	148770	164050	346170	346690	320850	332620	322570	312100	356140	284110	253600	1.52348	1.47966	1.33936	1.073	0.981363	0.814728	0.524057	0.479041	0.528243	1.11467	1.11635	1.03314	1.07104	1.03868	1.00497	1.14678	0.914838	0.816595	mitochondria
LmxM.36.4200	Arrestin (or S-antigen), N-terminal domain containing protein, putative OS=Leishmania_mexicana_MHOM/GT/2001/U1103 GN=LmxM.36.4200	LmxM.36.4200	1.52228	0.00336692	Up	89.706	15.2	10	10	10	39926	38655	39916	28496	22551	21439	30744	0	26506	31009	31082	26288	33707	34830	33202	19546	24772	23614	1.34064	1.29796	1.3403	0.95684	0.757219	0.71988	1.03232		0.89002	1.04122	1.04367	0.8827	1.13182	1.16952	1.11486	0.656317	0.831796	0.792912	nucleus
LmxM.26.2380	Fibronectin type III domain containing protein, putative OS=Leishmania_mexicana_MHOM/GT/2001/U1103 GN=LmxM.26.2380	LmxM.26.2380	1.55991	0.00351842	Up	554.82	32	104	103	104	1057300	1070900	1071800	544900	548110	551950	824820	810180	822850	971530	983600	968150	923680	909880	918250	1106600	1123400	1101500	1.1669	1.18191	1.1829	0.601383	0.604926	0.609164	0.910319	0.894162	0.908145	1.07224	1.08556	1.06851	1.01943	1.0042	1.01343	1.22131	1.23985	1.21568	nucleus
LmxM.16.1260	hypothetical protein, conserved OS=Leishmania_mexicana_MHOM/GT/2001/U1103 GN=LmxM.16.1260	LmxM.16.1260	1.75336	0.00357829	Up	187.19	12	16	16	16	1932000	1720000	1812100	755880	773250	794980	1444400	1093100	1371100	1878300	1781700	1780600	1751000	1743800	1697300	2135900	2136300	2454400	1.19686	1.06552	1.12258	0.468261	0.479021	0.492483	0.894793	0.677166	0.849384	1.16359	1.10375	1.10307	1.08473	1.08027	1.05146	1.32317	1.32342	1.52048	plasma membrane
LmxM.32.2960	hypothetical protein, conserved OS=Leishmania_mexicana_MHOM/GT/2001/U1103 GN=LmxM.32.2960	LmxM.32.2960	3.26423	0.00377379	Up	68.605	28.6	15	15	15	1439700	1354500	1409200	368790	280750	174060	630820	582650	538360	841150	822340	725260	1471700	1406700	1222600	1844100	1785400	1873500	1.38052	1.29883	1.35128	0.353631	0.26921	0.166906	0.604891	0.558701	0.516231	0.806576	0.788539	0.695449	1.41121	1.34888	1.17235	1.7683	1.71201	1.79649	nucleus
LmxM.34.2020	hypothetical protein, conserved OS=Leishmania_mexicana_MHOM/GT/2001/U1103 GN=LmxM.34.2020	LmxM.34.2020	1.51913	0.00377512	Up	42.264	32	9	9	9	641090	654250	683170	523470	492920	526450	333520	394810	333630	434540	484330	468210	453760	442460	436150	461410	405480	466100	1.33626	1.36369	1.42397	1.0911	1.02742	1.09731	0.695175	0.822926	0.695405	0.905737	1.00952	0.975918	0.945799	0.922245	0.909093	0.961744	0.845166	0.97152	cytoplasm	K03953	NDUFA9; NADH dehydrogenase (ubiquinone) 1 alpha subcomplex subunit 9
LmxM.11.0940	hypothetical protein, unknown function OS=Leishmania_mexicana_MHOM/GT/2001/U1103 GN=LmxM.11.0940	LmxM.11.0940	1.59216	0.0042455	Up	153.61	6.2	6	6	6	37844	44523	42511	21330	20913	18629	32988	31256	31750	37581	37651	31795	37483	43780	45374	42427	43380	56020	1.03645	1.21937	1.16427	0.584175	0.572754	0.510201	0.903458	0.856023	0.869552	1.02925	1.03117	0.870784	1.02656	1.19902	1.24268	1.16197	1.18807	1.53425	nucleus
LmxM.08.0550	translation initiation factor-like protein OS=Leishmania_mexicana_MHOM/GT/2001/U1103 GN=LmxM.08.0550	LmxM.08.0550	1.68029	0.00425159	Up	38.006	28.5	11	11	11	1041400	1003400	995400	455290	450090	460610	777350	747130	728190	1180300	1141100	1127700	725860	725690	726610	1418600	1450500	1503900	1.12522	1.08416	1.07552	0.491936	0.486317	0.497684	0.839918	0.807266	0.786801	1.2753	1.23295	1.21847	0.784284	0.7841	0.785094	1.53278	1.56725	1.62495	nucleus
LmxM.31.3360	Lipase (class 3), putative OS=Leishmania_mexicana_MHOM/GT/2001/U1103 GN=LmxM.31.3360	LmxM.31.3360	1.71509	0.00444181	Up	87.711	21.6	12	12	12	455000	454920	394900	221460	179290	221880	311500	304890	282560	332150	273020	287280	322200	335700	342560	369610	269700	362300	1.43159	1.43134	1.24249	0.69679	0.564109	0.698111	0.980087	0.95929	0.889032	1.04506	0.859016	0.903883	1.01375	1.05623	1.07781	1.16292	0.84857	1.13992	nucleus
LmxM.27.1070	vesicular-fusion ATPase-like protein, putative OS=Leishmania_mexicana_MHOM/GT/2001/U1103 GN=LmxM.27.1070	LmxM.27.1070	1.6489	0.00448603	Up	107.58	37.8	31	31	31	368450	372930	401160	174120	173990	174940	285660	292170	284940	298210	288860	288110	272730	272440	276050	349380	352920	338080	1.25962	1.27494	1.37145	0.595266	0.594822	0.59807	0.976589	0.998845	0.974128	1.01949	0.987529	0.984965	0.932385	0.931394	0.943736	1.19443	1.20653	1.1558	Golgi apparatus	K06027	NSF, SEC18; vesicle-fusing ATPase [EC:3.6.4.6]
LmxM.24.1070	hypothetical protein, conserved OS=Leishmania_mexicana_MHOM/GT/2001/U1103 GN=LmxM.24.1070	LmxM.24.1070	1.58152	0.00455202	Up	267.1	7.8	12	12	12	221150	179830	166580	114250	108020	101080	153290	136050	105050	147030	167380	144560	140400	120130	123840	191680	139330	160190	1.51944	1.23555	1.14451	0.784972	0.742167	0.694485	1.0532	0.934752	0.721762	1.01019	1.15001	0.993221	0.964639	0.825371	0.850861	1.31697	0.957287	1.10061	nucleus
LmxM.23.0120	Concanavalin A-like lectin/glucanases superfamily/Beige/BEACH domain containing protein, putative OS=Leishmania_mexicana_MHOM/GT/2001/U1103 GN=LmxM.23.0120	LmxM.23.0120	1.61507	0.00462277	Up	312.88	10.4	20	20	20	1746200	1665400	1726800	1216200	961730	1248300	1165300	1043300	728230	1364000	1587700	1446200	1414800	1238100	1194100	2298400	2170900	2088600	1.19492	1.13963	1.18165	0.832245	0.658112	0.854211	0.797415	0.71393	0.498328	0.933385	1.08646	0.989634	0.968147	0.847232	0.817122	1.57279	1.48555	1.42923	plasma membrane	K22262	WDFY3, ALFY; WD repeat and FYVE domain-containing protein 3
LmxM.36.6480	histidine secretory acid phosphatase, putative OS=Leishmania_mexicana_MHOM/GT/2001/U1103 GN=LmxM.36.6480	LmxM.36.6480	5.25524	0.00485208	Up	127.55	16	13	13	13	358180	333820	306590	16966	13706	17794	113400	111010	107160	233270	192760	254320	144530	162950	156540	563900	475690	490750	1.5906	1.48242	1.3615	0.0753424	0.0608654	0.0790194	0.503585	0.492972	0.475875	1.0359	0.856006	1.12938	0.641827	0.723626	0.695161	2.50416	2.11244	2.17932	nucleus
LmxM.16.1050	Protein of unknown function (DUF3184), putative OS=Leishmania_mexicana_MHOM/GT/2001/U1103 GN=LmxM.16.1050	LmxM.16.1050	1.98014	0.00490501	Up	111.62	37.2	26	12	26	383510	366610	412400	125950	135180	125860	275660	260060	251470	399450	393560	383040	341550	330670	329960	834410	858790	845590	0.978658	0.935532	1.05238	0.321405	0.344958	0.321175	0.703442	0.663633	0.641712	1.01933	1.0043	0.977459	0.871583	0.843819	0.842007	2.12928	2.1915	2.15781	extracellular
LmxM.19.0860	ATG8/AUT7/APG8/PAZ2, putative OS=Leishmania_mexicana_MHOM/GT/2001/U1103 GN=LmxM.19.0860	LmxM.19.0860	4.05281	0.00492534	Up	12.548	59.5	7	7	7	2999600	3030200	3085700	258640	265100	252020	1241500	1229400	1251700	1957800	1940000	1888300	2986600	2912000	3040300	6086900	6329300	6462800	1.14348	1.15515	1.1763	0.0985966	0.101059	0.096073	0.473274	0.468662	0.477163	0.746336	0.739551	0.719842	1.13853	1.11009	1.159	2.3204	2.4128	2.46369	extracellular	K08341	GABARAP, ATG8, LC3; GABA(A) receptor-associated protein
LmxM.03.0700	hypothetical protein, conserved OS=Leishmania_mexicana_MHOM/GT/2001/U1103 GN=LmxM.03.0700	LmxM.03.0700	1.56879	0.004948	Up	296.39	3.1	6	6	6	46368	43093	43288	20985	0	27163	28307	32225	32351	68140	50644	55995	34168	26288	34256	39092	0	35314	1.20109	1.11626	1.12131	0.543585		0.703617	0.733251	0.83474	0.838004	1.76506	1.31186	1.45047	0.885071	0.680951	0.887351	1.01262		0.914756	plasma membrane
LmxM.34.1620	Concanavalin A-like lectin/glucanases superfamily, putative OS=Leishmania_mexicana_MHOM/GT/2001/U1103 GN=LmxM.34.1620	LmxM.34.1620	1.76751	0.00542373	Up	212.26	12.3	18	18	18	61283	67161	64101	27802	25869	24062	44399	46486	49253	58276	56953	60037	69288	71433	69602	78797	77941	68669	1.07997	1.18356	1.12963	0.489945	0.455881	0.424037	0.782429	0.819207	0.867969	1.02698	1.00366	1.05801	1.22104	1.25884	1.22657	1.38861	1.37353	1.21013	plasma membrane
LmxM.27.0170	hypothetical protein, conserved OS=Leishmania_mexicana_MHOM/GT/2001/U1103 GN=LmxM.27.0170	LmxM.27.0170	1.6904	0.0054879	Up	50.442	23	6	6	6	84671	82796	89454	37415	45296	32826	73013	58882	56544	44274	39026	48585	56857	48800	57620	47999	51797	56630	1.50528	1.47195	1.59032	0.665165	0.805274	0.583582	1.29803	1.04681	1.00524	0.787105	0.693806	0.863746	1.01081	0.867568	1.02437	0.853328	0.920849	1.00677	nucleus
LmxM.32.0380	hypothetical protein, conserved OS=Leishmania_mexicana_MHOM/GT/2001/U1103 GN=LmxM.32.0380	LmxM.32.0380	1.79892	0.00569466	Up	48.166	15.1	5	5	5	45297	49164	56774	30677	36386	24875	17972	32156	26074	60638	47844	59865	28500	30942	39969	18066	27895	23881	1.24106	1.34701	1.55551	0.840498	0.996915	0.681533	0.492402	0.88102	0.714383	1.66138	1.31084	1.6402	0.780852	0.847758	1.09508	0.494978	0.764276	0.654299	mitochondria
LmxM.26.1760	hypothetical protein, conserved OS=Leishmania_mexicana_MHOM/GT/2001/U1103 GN=LmxM.26.1760	LmxM.26.1760	1.62009	0.00571616	Up	52.503	17.4	6	6	6	101130	76036	81638	56784	64231	63150	41902	50462	42964	68417	53347	62927	80873	75415	104320	66515	0	91776	1.45463	1.09368	1.17426	0.816768	0.923884	0.908336	0.602709	0.725834	0.617985	0.984095	0.767331	0.905128	1.16326	1.08475	1.50052	0.956737		1.32009	nucleus
LmxM.16.1240	hypothetical protein, unknown function OS=Leishmania_mexicana_MHOM/GT/2001/U1103 GN=LmxM.16.1240	LmxM.16.1240	1.55161	0.00583633	Up	227.15	9.2	14	14	14	116030	112360	108380	66448	53474	52031	79887	90945	91306	133680	128350	118310	99845	107830	104440	105460	97579	103500	1.18006	1.14274	1.10226	0.675798	0.543848	0.529172	0.812477	0.92494	0.928612	1.35957	1.30536	1.20325	1.01546	1.09667	1.06219	1.07256	0.99241	1.05263	nucleus
LmxM.20.0770	protein kinase, putative OS=Leishmania_mexicana_MHOM/GT/2001/U1103 GN=LmxM.20.0770	LmxM.20.0770	2.21328	0.00587709	Up	417.73	4.5	11	11	11	756390	593760	628790	234930	294870	263620	452040	167530	375250	674400	588920	534200	577100	520040	505070	1006800	861340	774620	1.38792	1.0895	1.15378	0.431079	0.541064	0.483723	0.829459	0.307405	0.688555	1.23747	1.08062	0.980216	1.05893	0.954234	0.926765	1.8474	1.58049	1.42137	nucleus	K04420	MAP3K2, MEKK2; mitogen-activated protein kinase kinase kinase 2 [EC:2.7.11.25]
LmxM.23.0380	ATP-binding cassette protein subfamily G, member 5 OS=Leishmania_mexicana_MHOM/GT/2001/U1103 GN=LmxM.23.0380	LmxM.23.0380	1.55517	0.00672368	Up	135.09	18.7	15	15	15	531410	522350	545460	271930	256820	260480	436800	411920	418700	456860	441400	457890	467020	440290	449670	708210	669060	694220	1.13327	1.11395	1.16324	0.579912	0.547689	0.555494	0.93151	0.878451	0.89291	0.974289	0.94132	0.976486	0.995956	0.938953	0.958956	1.51031	1.42682	1.48048	plasma membrane	K05681	ABCG2, CD338; ATP-binding cassette, subfamily G (WHITE), member 2
LmxM.24.1340	translation initiation factor IF-2, putative OS=Leishmania_mexicana_MHOM/GT/2001/U1103 GN=LmxM.24.1340	LmxM.24.1340	1.55604	0.00681967	Up	99.162	10.4	6	5	6	337510	236920	224480	0	191130	163750	181110	164330	155390	245540	408470	358680	384250	231000	255060	106600	0	118170	1.4353	1.00753	0.954627		0.812803	0.696366	0.770191	0.698832	0.660814	1.04419	1.73707	1.52533	1.63407	0.982354	1.08467	0.453329		0.502532	mitochondria	K02519	infB, MTIF2; translation initiation factor IF-2
LmxM.27.1130	intraflagellar transport protein 88, putative OS=Leishmania_mexicana_MHOM/GT/2001/U1103 GN=LmxM.27.1130	LmxM.27.1130	1.82068	0.00683449	Up	91.082	20.8	13	13	13	143740	138920	138650	51788	54243	51820	103160	94914	106880	115380	114920	113350	88577	89722	87046	112710	114590	109510	1.4139	1.36649	1.36383	0.509412	0.533561	0.509727	1.01473	0.933621	1.05132	1.13493	1.13041	1.11497	0.871287	0.88255	0.856228	1.10867	1.12716	1.07719	nucleus	K16474	IFT88; intraflagellar transport protein 88
LmxM.04.0210	surface antigen-like protein OS=Leishmania_mexicana_MHOM/GT/2001/U1103 GN=LmxM.04.0210	LmxM.04.0210	2.09106	0.00723655	Up	36.97	13.2	3	3	3	212350	248970	278100	0	0	0	125500	110240	0	0	175620	0	258520	239860	246830	259470	262440	234270	0.960798	1.12649	1.25829				0.567837	0.498792			0.79461		1.1697	1.08527	1.11681	1.174	1.18744	1.05998	plasma membrane
LmxM.05.0890	CPSF A subunit region, putative OS=Leishmania_mexicana_MHOM/GT/2001/U1103 GN=LmxM.05.0890	LmxM.05.0890	1.78085	0.00750632	Up	208.66	41	48	48	48	520160	526610	517040	207300	194040	201510	384360	382980	386060	603460	608940	626680	438800	434460	436620	660390	642180	642790	1.11272	1.12652	1.10605	0.443455	0.415089	0.431069	0.822221	0.819269	0.825858	1.29092	1.30264	1.34059	0.938679	0.929395	0.934015	1.4127	1.37375	1.37505	plasma membrane
LmxM.27.0270	hypothetical protein, conserved OS=Leishmania_mexicana_MHOM/GT/2001/U1103 GN=LmxM.27.0270	LmxM.27.0270	2.11607	0.00764183	Up	118.25	18.7	14	14	14	183550	186920	178140	51704	51832	49182	118000	134020	113780	141910	145630	149270	145930	139650	141190	209600	224630	228160	1.27411	1.29751	1.23656	0.358904	0.359792	0.341397	0.819097	0.9303	0.789804	0.985069	1.01089	1.03616	1.01297	0.969381	0.980071	1.45494	1.55927	1.58377	nucleus
LmxM.32.3070partial	hypothetical protein OS=Leishmania_mexicana_MHOM/GT/2001/U1103 GN=LmxM.32.3070partial	LmxM.32.3070partial	1.91218	0.00767133	Up	96.46	42.4	8	3	3	401720	421390	416000	128340	140170	150870	282440	284640	309560	355760	382910	366430	343650	344850	343260	303720	323330	288830	1.29405	1.35741	1.34005	0.413417	0.451524	0.485992	0.909814	0.9169	0.997174	1.146	1.23345	1.18037	1.10699	1.11085	1.10573	0.978362	1.04153	0.930397	extracellular
LmxM.05.0040	paraflagellar rod component par4, putative OS=Leishmania_mexicana_MHOM/GT/2001/U1103 GN=LmxM.05.0040	LmxM.05.0040	1.61002	0.00772406	Up	68.44	61.4	38	38	38	650300	640870	649030	300950	291910	299270	511540	494480	512000	304130	273490	284400	660610	650920	649620	248210	254710	247360	1.47725	1.45582	1.47436	0.683649	0.663114	0.679833	1.16203	1.12328	1.16308	0.690873	0.62127	0.646054	1.50067	1.47865	1.4757	0.563843	0.578609	0.561912	cytoplasm
LmxM.29.3580	serine/threonine-protein kinase, putative OS=Leishmania_mexicana_MHOM/GT/2001/U1103 GN=LmxM.29.3580	LmxM.29.3580	1.96656	0.00816129	Up	84.682	21.1	12	12	12	341740	331690	277020	111810	117660	125390	232780	160490	218480	269750	265900	263800	233850	202430	217840	454170	245080	376450	1.38346	1.34277	1.12146	0.452638	0.476321	0.507614	0.942359	0.649709	0.884469	1.09202	1.07644	1.06794	0.946691	0.819494	0.881878	1.83861	0.992153	1.52398	cytoplasm	K08832	SRPK3, STK23; serine/threonine-protein kinase SRPK3 [EC:2.7.11.1]
LmxM.28.0850	minichromosome maintenance (MCM) complex subunit, putative OS=Leishmania_mexicana_MHOM/GT/2001/U1103 GN=LmxM.28.0850	LmxM.28.0850	1.69117	0.00859361	Up	110.71	11.8	9	9	9	46962	52616	51553	20203	28840	22985	36688	37092	32921	19868	52840	36818	32714	32121	32271	48535	61313	40693	1.23039	1.37852	1.35067	0.529311	0.755597	0.602198	0.961211	0.971796	0.862518	0.520534	1.38439	0.964617	0.857094	0.841558	0.845488	1.2716	1.60638	1.06614	nucleus	K02540	MCM2; DNA replication licensing factor MCM2 [EC:5.6.2.3]
LmxM.16.0900	hypothetical protein, conserved OS=Leishmania_mexicana_MHOM/GT/2001/U1103 GN=LmxM.16.0900	LmxM.16.0900	1.69171	0.00870679	Up	183.8	36.2	41	41	41	255210	248250	250410	104980	105690	102400	191090	197660	189430	203280	205570	201060	233340	238130	238100	316300	315340	305710	1.1773	1.1452	1.15516	0.484281	0.487556	0.472379	0.881513	0.911821	0.873855	0.937747	0.94831	0.927505	1.07642	1.09851	1.09837	1.45912	1.45469	1.41026	nucleus
LmxM.22.1330	hypothetical protein, conserved OS=Leishmania_mexicana_MHOM/GT/2001/U1103 GN=LmxM.22.1330	LmxM.22.1330	1.762	0.00906908	Up	413.51	57.4	17	17	17	827540	811890	761070	308190	292990	314770	602300	629500	577000	352260	366920	355460	553190	573050	550780	719310	693480	701630	1.49086	1.46267	1.37111	0.555223	0.52784	0.567078	1.08508	1.13408	1.0395	0.634618	0.661029	0.640383	0.996606	1.03239	0.992264	1.29588	1.24935	1.26403	nucleus
LmxM.07.0020	Isy1-like splicing family, putative OS=Leishmania_mexicana_MHOM/GT/2001/U1103 GN=LmxM.07.0020	LmxM.07.0020	1.80474	0.00927556	Up	37.124	12.3	4	4	4	126350	119250	114410	0	46613	0	78253	62130	78978	94476	0	112960	0	0	55743	103160	103190	105590	1.36753	1.29069	1.2383		0.50451		0.846962	0.672457	0.854809	1.02255		1.22261			0.603328	1.11654	1.11687	1.14284	mitochondria
LmxM.19.1160	hypothetical protein, conserved OS=Leishmania_mexicana_MHOM/GT/2001/U1103 GN=LmxM.19.1160	LmxM.19.1160	1.85222	0.0097841	Up	41.311	61	19	19	19	806030	792930	798400	282660	268070	276150	586270	599890	575590	1043900	1028700	1038000	577310	566260	554380	1086700	1035800	1056600	1.11831	1.10013	1.10772	0.392171	0.371928	0.383138	0.813408	0.832305	0.79859	1.44834	1.42725	1.44015	0.800976	0.785645	0.769163	1.50772	1.4371	1.46596	nucleus
LmxM.18.0310	hypothetical protein, conserved OS=Leishmania_mexicana_MHOM/GT/2001/U1103 GN=LmxM.18.0310	LmxM.18.0310	1.8745	0.0107062	Up	11.997	27.5	2	2	2	173470	242190	244970	84553	87641	0	138720	139310	137160	231010	209470	269800	114750	111900	207420	80295	77655	128850	1.10071	1.53676	1.5544	0.536511	0.556105		0.880215	0.883959	0.870316	1.46582	1.32914	1.71195	0.728119	0.710035	1.31613	0.509493	0.492741	0.817587	extracellular
LmxM.07.0360	Protein of unknown function (DUF1674), putative OS=Leishmania_mexicana_MHOM/GT/2001/U1103 GN=LmxM.07.0360	LmxM.07.0360	1.98495	0.0107947	Up	11.997	45.8	4	4	4	1113900	1226200	1222200	446980	367280	278640	834920	858370	803120	1113100	1313900	1123500	923400	380630	376350	840810	946020	899650	1.33056	1.46471	1.45993	0.533921	0.438719	0.332838	0.997318	1.02533	0.959333	1.32961	1.56946	1.34203	1.10301	0.454665	0.449553	1.00435	1.13003	1.07464	cytoplasm
LmxM.23.0260	argininosuccinate synthase, putative OS=Leishmania_mexicana_MHOM/GT/2001/U1103 GN=LmxM.23.0260	LmxM.23.0260	1.51649	0.0109716	Up	46.534	69.2	23	23	23	1858600	1945600	1908800	952380	923690	947220	1549900	1593100	1568200	1445700	1437900	1409500	1737100	1730900	1724600	1941900	1900000	1919700	1.17407	1.22902	1.20578	0.601613	0.58349	0.598354	0.979063	1.00635	0.990623	0.913241	0.908313	0.890373	1.09732	1.0934	1.08942	1.22669	1.20022	1.21266	cytoplasm	K01940	argG, ASS1; argininosuccinate synthase [EC:6.3.4.5]
LmxM.32.2940	hypothetical protein, conserved OS=Leishmania_mexicana_MHOM/GT/2001/U1103 GN=LmxM.32.2940	LmxM.32.2940	1.7571	0.0110599	Up	68.435	35.8	18	17	18	358490	367410	345450	0	0	136790	230810	222040	223330	169900	161180	181500	515630	569220	551270	527060	541540	536920	1.01726	1.04257	0.980254			0.388157	0.65495	0.630064	0.633724	0.482111	0.457367	0.515027	1.46316	1.61523	1.56429	1.49559	1.53668	1.52357	nucleus
LmxM.23.1050	small hydrophilic endoplasmic reticulum-associated protein (sherp) OS=Leishmania_mexicana_MHOM/GT/2001/U1103 GN=LmxM.23.1050	LmxM.23.1050	2.70445	0.011259	Up	5.9464	80.7	4	4	4	2575600	2362000	2245100	392640	332160	327370	1388900	1460400	1410300	1069200	1029200	1023700	2664300	2626700	2590100	2581700	2465600	2365600	1.49984	1.37545	1.30738	0.228644	0.193425	0.190636	0.808791	0.850428	0.821253	0.622622	0.599329	0.596126	1.55149	1.52959	1.50828	1.50339	1.43578	1.37755	cytoplasm
LmxM.33.3330	cytochrome p450-like protein OS=Leishmania_mexicana_MHOM/GT/2001/U1103 GN=LmxM.33.3330	LmxM.33.3330	1.70401	0.0114829	Up	62.011	26.5	11	11	11	153890	154850	163640	0	0	0	103420	71367	102430	106460	117560	93890	161800	167640	155720	236280	257870	241840	1.0086	1.0149	1.07251				0.677821	0.467744	0.671333	0.697745	0.770496	0.615361	1.06045	1.09872	1.0206	1.54859	1.6901	1.58503	mitochondria	K15001	CYP4; cytochrome P450 family 4 [EC:1.14.-.-]
LmxM.27.1940	cdc2-related kinase 9 OS=Leishmania_mexicana_MHOM/GT/2001/U1103 GN=LmxM.27.1940	LmxM.27.1940	1.94409	0.0117072	Up	101.99	20.8	15	15	15	242070	212830	252270	79941	66112	66914	171280	172570	170690	170550	170550	172910	169490	187650	197650	219760	219560	230160	1.37325	1.20737	1.43111	0.453501	0.37505	0.379599	0.971661	0.97898	0.968314	0.96752	0.96752	0.980908	0.961507	1.06453	1.12126	1.24669	1.24555	1.30568	nucleus	K02449	CDK10; cyclin-dependent kinase 10 [EC:2.7.11.22]
LmxM.26.2320	hypothetical protein, conserved OS=Leishmania_mexicana_MHOM/GT/2001/U1103 GN=LmxM.26.2320	LmxM.26.2320	1.65168	0.0117382	Up	78.991	35	15	15	15	465660	466640	453510	198610	195840	186150	362710	374770	359980	443400	450180	431450	441040	429890	418760	445680	457870	458040	1.19058	1.19308	1.15951	0.507797	0.500714	0.47594	0.92736	0.958194	0.92038	1.13366	1.151	1.10311	1.12763	1.09912	1.07067	1.13949	1.17066	1.1711	mitochondria
LmxM.20.1110	hypothetical protein, conserved OS=Leishmania_mexicana_MHOM/GT/2001/U1103 GN=LmxM.20.1110	LmxM.20.1110	1.64101	0.0117678	Up	124.24	18.9	17	17	17	230240	204010	202910	96915	87282	84537	176070	170220	161520	233180	233030	212910	169190	174500	167960	270980	268810	259590	1.21754	1.07883	1.07301	0.512498	0.461558	0.447042	0.93108	0.900144	0.854138	1.23308	1.23229	1.12589	0.894698	0.922778	0.888193	1.43298	1.4215	1.37274	nucleus
LmxM.29.2570	hypothetical protein, conserved OS=Leishmania_mexicana_MHOM/GT/2001/U1103 GN=LmxM.29.2570	LmxM.29.2570	2.26117	0.0118709	Up	46.133	52.8	16	16	16	262460	252300	258060	61189	52989	54929	171000	174070	169380	195160	190270	186900	263250	272290	261680	371220	382330	377070	1.19404	1.14782	1.17402	0.278375	0.241069	0.249895	0.777951	0.791918	0.770581	0.887865	0.865618	0.850287	1.19764	1.23876	1.19049	1.68884	1.73938	1.71545	cytoplasm,nucleus
LmxM.27.1790	hypothetical protein, conserved OS=Leishmania_mexicana_MHOM/GT/2001/U1103 GN=LmxM.27.1790	LmxM.27.1790	1.51941	0.0119232	Up	92.707	14.3	9	9	9	72034	66019	66455	37688	30151	33289	50672	57811	59583	40206	46714	48244	59403	60785	61254	18429	25393	16104	1.52501	1.39766	1.4069	0.797879	0.638316	0.70475	1.07276	1.2239	1.26141	0.851187	0.988965	1.02136	1.2576	1.28686	1.29679	0.390154	0.537586	0.340932	nucleus
LmxM.32.2980	hypothetical protein, conserved OS=Leishmania_mexicana_MHOM/GT/2001/U1103 GN=LmxM.32.2980	LmxM.32.2980	4.34289	0.0123056	Up	126.76	42.1	38	38	38	255380	230620	243880	7622.9	17577	7463.3	98391	107990	97082	108280	102560	106140	295060	270990	298580	678450	753530	674150	1.05584	0.953469	1.00829	0.0315159	0.0726698	0.030856	0.406785	0.446471	0.401373	0.44767	0.424021	0.438822	1.21989	1.12037	1.23444	2.80496	3.11537	2.78719	nucleus
LmxM.33.2080	hypothetical protein, conserved OS=Leishmania_mexicana_MHOM/GT/2001/U1103 GN=LmxM.33.2080	LmxM.33.2080	1.62235	0.0123868	Up	206.24	9.7	13	13	13	61359	54997	60127	23993	27005	24906	50314	42213	49133	57414	53455	53573	50130	53259	53984	61493	51394	60625	1.24184	1.11308	1.21691	0.485593	0.546553	0.504071	1.0183	0.854347	0.994401	1.162	1.08187	1.08426	1.01458	1.07791	1.09258	1.24455	1.04016	1.22699	nucleus
LmxM.36.6030	hypothetical protein, conserved OS=Leishmania_mexicana_MHOM/GT/2001/U1103 GN=LmxM.36.6030	LmxM.36.6030	1.62163	0.0124331	Up	259.92	24.2	39	39	39	298000	301740	295090	128270	129010	127970	236790	243210	238370	246830	256590	250120	248290	253640	241180	259920	263880	270300	1.25058	1.26628	1.23837	0.538296	0.541402	0.537037	0.99371	1.02065	1.00034	1.03584	1.0768	1.04965	1.04197	1.06442	1.01213	1.09078	1.1074	1.13434	nucleus	K18533	AK9; adenylate/nucleoside-diphosphate kinase [EC:2.7.4.3 2.7.4.6]
LmxM.32.3010	hypothetical protein, conserved OS=Leishmania_mexicana_MHOM/GT/2001/U1103 GN=LmxM.32.3010	LmxM.32.3010	3.35475	0.0129319	Up	113.59	21.3	14	14	14	200690	247360	246480	14836	20122	18071	96539	130740	133750	146860	116570	96569	318280	302540	306640	247250	380670	366010	1.06562	1.31342	1.30875	0.0787758	0.106843	0.0959529	0.5126	0.694199	0.710182	0.779793	0.61896	0.512759	1.68999	1.60642	1.62819	1.31284	2.02127	1.94343	nucleus
LmxM.34.1090	Nucleolar protein 111, putative OS=Leishmania_mexicana_MHOM/GT/2001/U1103 GN=LmxM.34.1090	LmxM.34.1090	1.61682	0.0136068	Up	114.9	9.1	6	6	6	85493	93592	85278	57642	40694	45957	76649	51572	0	91569	102920	80837	64662	57494	68298	67805	31060	62921	1.24813	1.36637	1.245	0.84153	0.594102	0.670938	1.11902	0.752913		1.33684	1.50256	1.18016	0.944017	0.83937	0.9971	0.989902	0.453453	0.9186	nucleus	K14786	KRI1; protein KRI1
LmxM.02.0250	hypothetical protein, conserved OS=Leishmania_mexicana_MHOM/GT/2001/U1103 GN=LmxM.02.0250	LmxM.02.0250	1.51744	0.0142375	Up	118.68	6.2	5	5	5	31124	23493	23185	0	16394	17355	17523	0	0	27522	30274	28063	17105	14950	0	33805	27209	34140	1.27355	0.961303	0.9487		0.670821	0.710144	0.717018			1.12616	1.23877	1.1483	0.699914	0.611734		1.38326	1.11336	1.39696	nucleus
LmxM.08_29.0350	hypothetical protein, conserved OS=Leishmania_mexicana_MHOM/GT/2001/U1103 GN=LmxM.08_29.0350	LmxM.08_29.0350	1.56042	0.0144061	Up	155.26	49.1	48	48	48	224470	220950	220340	104060	99933	99447	184370	182080	183420	171470	170790	169200	195270	192540	186550	196620	201690	202840	1.26026	1.2405	1.23708	0.584235	0.561064	0.558336	1.03513	1.02227	1.02979	0.962702	0.958884	0.949957	1.09632	1.081	1.04737	1.1039	1.13237	1.13883	mitochondria,nucleus
LmxM.32.2930	Present in the outer mitochondrial membrane proteome 22-2 OS=Leishmania_mexicana_MHOM/GT/2001/U1103 GN=LmxM.32.2930	LmxM.32.2930	3.82535	0.0152801	Up	143.15	50.5	44	44	44	242680	241180	244750	8070.2	13284	12533	116440	110020	120590	134320	127800	125350	276570	282070	279030	650570	1062800	859420	0.890119	0.884617	0.897712	0.0296005	0.048724	0.0459694	0.427087	0.403539	0.442309	0.492669	0.468754	0.459768	1.01442	1.0346	1.02345	2.38621	3.89821	3.15224	cytoplasm,nucleus
LmxM.27.1820	hypothetical protein, unknown function OS=Leishmania_mexicana_MHOM/GT/2001/U1103 GN=LmxM.27.1820	LmxM.27.1820	1.56254	0.0153537	Up	244.91	42.1	53	51	53	1361000	1285700	1231500	594740	550970	596570	1046400	1073200	1102100	838110	860400	856450	1075600	1051300	1040500	1427400	1431800	1451400	1.2979	1.22609	1.1744	0.567165	0.525424	0.56891	0.997884	1.02344	1.051	0.799251	0.820508	0.816741	1.02573	1.00256	0.992258	1.36122	1.36542	1.38411	nucleus
LmxM.30.0300	CRAL/TRIO domain containing protein, putative OS=Leishmania_mexicana_MHOM/GT/2001/U1103 GN=LmxM.30.0300	LmxM.30.0300	1.68986	0.016144	Up	127.24	6.8	6	6	6	184540	148270	175120	67804	69006	134430	118050	105340	106520	134970	135570	150770	161510	141910	153170	126810	169660	181120	1.34779	1.08289	1.27899	0.495207	0.503986	0.98181	0.862179	0.769351	0.777969	0.985754	0.990136	1.10115	1.17959	1.03644	1.11868	0.926158	1.23911	1.32281	plasma membrane
LmxM.33.4260	Unc104-like kinesin, putative OS=Leishmania_mexicana_MHOM/GT/2001/U1103 GN=LmxM.33.4260	LmxM.33.4260	1.78103	0.0161563	Up	162.6	16.6	18	17	17	132340	128530	118590	40749	45269	43705	117150	93731	85509	117460	124670	98235	133490	129240	126540	185110	179920	174130	1.14836	1.1153	1.02905	0.353593	0.392815	0.379243	1.01655	0.813336	0.741991	1.01924	1.0818	0.852419	1.15834	1.12146	1.09803	1.60626	1.56123	1.51099	nucleus	K10392	KIF1; kinesin family member 1
LmxM.32.0760	hypothetical protein, conserved OS=Leishmania_mexicana_MHOM/GT/2001/U1103 GN=LmxM.32.0760	LmxM.32.0760	1.69853	0.0168623	Up	38.631	17.7	3	3	3	59734	45795	47648	26265	23678	19282	36552	35181	39406	47718	42156	41203	52753	56923	50323	35563	35463	29147	1.48348	1.13731	1.18333	0.652285	0.588038	0.478864	0.907761	0.873712	0.978639	1.18507	1.04693	1.02327	1.31011	1.41367	1.24976	0.883199	0.880716	0.723859	nucleus
LmxM.16.0840	hypothetical protein, conserved OS=Leishmania_mexicana_MHOM/GT/2001/U1103 GN=LmxM.16.0840	LmxM.16.0840	1.5189	0.0174817	Up	86.708	21.3	12	12	12	201360	165270	173830	85967	77369	92300	157600	148320	150090	169990	177120	163970	156850	159500	159650	204950	198790	214340	1.26851	1.04116	1.09508	0.541569	0.487404	0.581465	0.992837	0.934376	0.945526	1.07089	1.11581	1.03297	0.988112	1.00481	1.00575	1.29113	1.25232	1.35028	nucleus
LmxM.16.0170	hypothetical protein, conserved OS=Leishmania_mexicana_MHOM/GT/2001/U1103 GN=LmxM.16.0170	LmxM.16.0170	2.4532	0.017643	Up	486.09	13.2	37	37	37	294750	277930	263030	46898	48418	34426	177980	194220	179380	295610	323980	316880	241260	285160	265010	408350	420270	375220	1.19258	1.12452	1.06424	0.189752	0.195902	0.13929	0.720118	0.785826	0.725782	1.19606	1.31084	1.28212	0.976153	1.15377	1.07225	1.65221	1.70044	1.51816	plasma membrane
LmxM.16.0140	eukaryotic translation initiation factor 1A, putative OS=Leishmania_mexicana_MHOM/GT/2001/U1103 GN=LmxM.16.0140	LmxM.16.0140	1.56933	0.0178344	Up	18.693	50	9	9	9	954930	1001100	963200	426350	423580	426660	816220	811060	816490	1430900	1377300	1372800	774600	755980	746800	1556400	1544400	1584000	0.966595	1.01333	0.974966	0.431558	0.428754	0.431872	0.826191	0.820968	0.826464	1.44838	1.39412	1.38957	0.784062	0.765215	0.755923	1.57541	1.56327	1.60335	cytoplasm	K03236	EIF1A; translation initiation factor 1A
LmxM.16.1480	hypothetical protein, conserved OS=Leishmania_mexicana_MHOM/GT/2001/U1103 GN=LmxM.16.1480	LmxM.16.1480	1.52792	0.0179562	Up	69.648	32.2	13	13	13	167050	168370	170210	79936	76101	78035	150710	141700	135370	148400	155230	147230	166730	164560	155570	244060	244740	247220	1.05831	1.06667	1.07833	0.506419	0.482123	0.494375	0.954793	0.897712	0.85761	0.940159	0.983429	0.932747	1.05628	1.04254	0.985583	1.54619	1.5505	1.56621	extracellular
LmxM.24.0930	hypothetical protein, conserved OS=Leishmania_mexicana_MHOM/GT/2001/U1103 GN=LmxM.24.0930	LmxM.24.0930	1.59247	0.0181982	Up	97.717	12.6	8	8	8	160620	151040	189470	73142	95668	95235	100140	103900	161290	184160	200070	161750	124200	146340	132140	93417	61949	100630	1.2381	1.16425	1.46048	0.563797	0.737433	0.734095	0.771904	0.800887	1.24326	1.41955	1.54219	1.24681	0.957364	1.12803	1.01857	0.720081	0.477518	0.775681	extracellular
LmxM.05.0380	KH-associated protein 2 OS=Leishmania_mexicana_MHOM/GT/2001/U1103 GN=LmxM.05.0380	LmxM.05.0380	1.76031	0.0182573	Up	89.529	92.3	16	16	16	35182000	35635000	34129000	11568000	11843000	12394000	27535000	28056000	27840000	29167000	28217000	27376000	29036000	28478000	28427000	46041000	41992000	43532000	1.20292	1.21841	1.16692	0.395526	0.404929	0.423768	0.941461	0.959274	0.951889	0.997261	0.964779	0.936024	0.992782	0.973703	0.971959	1.57421	1.43577	1.48842	cytoplasm
LmxM.27.2160	hypothetical protein, conserved OS=Leishmania_mexicana_MHOM/GT/2001/U1103 GN=LmxM.27.2160	LmxM.27.2160	1.64965	0.0182972	Up	42.612	31.9	7	7	7	57037	53646	52161	46309	35677	33669	24664	36338	20771	40421	34052	38582	21137	27444	25351	22909	14564	45086	1.6301	1.53319	1.49074	1.3235	1.01964	0.962249	0.704889	1.03853	0.593629	1.15522	0.973195	1.10266	0.604089	0.784341	0.724524	0.654732	0.416235	1.28854	mitochondria
LmxM.09.0910	calmodulin, putative OS=Leishmania_mexicana_MHOM/GT/2001/U1103 GN=LmxM.09.0910	LmxM.09.0910	1.59106	0.0183025	Up	16.824	71.1	14	14	14	8699400	8792300	8882300	3570600	3772200	3854400	7369700	7301800	7284000	8957900	9185000	9168500	7227800	7147000	7093900	12572000	12769000	12813000	1.06915	1.08057	1.09163	0.438826	0.463603	0.473705	0.905735	0.89739	0.895202	1.10092	1.12883	1.12681	0.888295	0.878365	0.871839	1.5451	1.56931	1.57471	cytoplasm,nucleus	K02183	CALM; calmodulin
LmxM.04.0890	hypothetical protein, conserved OS=Leishmania_mexicana_MHOM/GT/2001/U1103 GN=LmxM.04.0890	LmxM.04.0890	1.68353	0.0188956	Up	136.32	15.8	15	15	15	93505	87107	80295	29109	29655	41762	73084	64335	72008	90703	89111	81560	81473	79573	100320	165000	153190	142470	1.08289	1.00879	0.929902	0.337113	0.343437	0.483649	0.846391	0.745068	0.83393	1.05044	1.032	0.944552	0.943545	0.921541	1.16181	1.91088	1.7741	1.64996	mitochondria
LmxM.36.2260	guanylate kinase-like protein OS=Leishmania_mexicana_MHOM/GT/2001/U1103 GN=LmxM.36.2260	LmxM.36.2260	1.50207	0.0195043	Up	36.307	57.5	13	13	13	190310	197120	176490	84531	95925	86529	164040	165650	154180	222780	197440	208030	187650	205450	211770	243840	251860	256040	1.03817	1.07532	0.962779	0.461129	0.523285	0.472029	0.894863	0.903645	0.841075	1.2153	1.07706	1.13483	1.02366	1.12076	1.15524	1.33018	1.37393	1.39674	extracellular	K00942	gmk, GUK1; guanylate kinase [EC:2.7.4.8]
LmxM.05.1110	hypothetical protein, conserved OS=Leishmania_mexicana_MHOM/GT/2001/U1103 GN=LmxM.05.1110	LmxM.05.1110	1.68252	0.0197939	Up	133.04	18.1	18	17	18	332460	318120	315660	120000	115540	122970	245680	268950	275420	262420	270000	276280	400200	365390	373900	539210	527880	515820	1.05993	1.01422	1.00637	0.382579	0.368359	0.392047	0.783266	0.857454	0.878081	0.836635	0.860802	0.880823	1.2759	1.16492	1.19205	1.71908	1.68296	1.64451	nucleus
LmxM.36.2470	acid phosphatase, putative OS=Leishmania_mexicana_MHOM/GT/2001/U1103 GN=LmxM.36.2470	LmxM.36.2470	1.76562	0.0202012	Up	50.995	28.8	10	10	10	191130	196430	189310	81952	60678	55359	148280	159400	147780	208340	198430	217910	132090	142310	132270	432640	395500	440570	0.974496	1.00152	0.965216	0.417841	0.309373	0.282254	0.756021	0.812717	0.753472	1.06224	1.01172	1.11104	0.673474	0.725582	0.674392	2.20586	2.0165	2.24629	mitochondria	K19283	ACPP; prostatic acid phosphatase [EC:3.1.3.2 3.1.3.5]
LmxM.36.5700	hypothetical protein, conserved OS=Leishmania_mexicana_MHOM/GT/2001/U1103 GN=LmxM.36.5700	LmxM.36.5700	1.51342	0.0208472	Up	86.158	23.8	12	12	12	122400	140960	153770	79844	74437	68737	119900	116200	92123	171600	160340	184020	135620	138850	152620	176320	209610	205140	0.880403	1.0139	1.10604	0.574305	0.535413	0.494414	0.862421	0.835807	0.662625	1.23429	1.1533	1.32363	0.975492	0.998725	1.09777	1.26824	1.50769	1.47554	cytoplasm
LmxM.31.1260	CRAL/TRIO domain containing protein, putative OS=Leishmania_mexicana_MHOM/GT/2001/U1103 GN=LmxM.31.1260	LmxM.31.1260	2.11548	0.0212736	Up	53.531	56.1	19	19	19	632700	602090	598080	121230	125570	133980	452660	454340	445040	448590	439200	458010	955610	934000	926320	1056800	1057200	1090300	1.04179	0.991392	0.984789	0.199615	0.206762	0.220609	0.745343	0.748109	0.732796	0.738641	0.72318	0.754152	1.57349	1.53791	1.52526	1.74011	1.74077	1.79527	cytoplasm
LmxM.32.0550	hypothetical protein, conserved OS=Leishmania_mexicana_MHOM/GT/2001/U1103 GN=LmxM.32.0550	LmxM.32.0550	2.21001	0.0223876	Up	225.98	18.6	27	27	27	85089	59879	66495	19785	12965	9439.4	50236	47456	51487	100360	107380	94044	60969	58503	53555	94355	92771	94865	1.32076	0.929451	1.03215	0.307106	0.201245	0.14652	0.779771	0.736619	0.799189	1.5578	1.66677	1.45976	0.94637	0.908092	0.831289	1.46459	1.44001	1.47251	nucleus
LmxM.34.1610	hypothetical protein, conserved OS=Leishmania_mexicana_MHOM/GT/2001/U1103 GN=LmxM.34.1610	LmxM.34.1610	1.70816	0.022457	Up	103.63	5.2	3	3	3	62251	62655	62314	29647	33410	23347	0	50070	46198	66603	63461	67609	54636	53660	47574	0	42025	0	1.21987	1.22779	1.22111	0.580964	0.654704	0.457509		0.981175	0.905299	1.30516	1.24359	1.32487	1.07065	1.05152	0.932263		0.823524		plasma membrane
LmxM.05.1215	surface antigen-like protein OS=Leishmania_mexicana_MHOM/GT/2001/U1103 GN=LmxM.05.1215	LmxM.05.1215	3.54862	0.0233648	Up	30.053	22.9	5	5	5	1728700	1694100	1747100	64550	55535	44049	896190	927250	926180	642890	565770	558110	2678500	2572000	2638400	2392000	2460400	2432400	1.24346	1.21858	1.2567	0.0464312	0.0399467	0.0316847	0.644635	0.666976	0.666207	0.462435	0.406962	0.401452	1.92666	1.85005	1.89782	1.72058	1.76978	1.74964	plasma membrane
LmxM.26.1450	hypothetical protein, conserved OS=Leishmania_mexicana_MHOM/GT/2001/U1103 GN=LmxM.26.1450	LmxM.26.1450	1.57858	0.023609	Up	144.73	27.8	23	23	23	304580	314280	310740	138720	126500	120910	270730	253000	267910	256290	233750	242400	400250	363610	408270	253960	275900	264430	1.14069	1.17702	1.16376	0.519526	0.47376	0.452825	1.01392	0.94752	1.00336	0.959842	0.875426	0.907822	1.49899	1.36177	1.52903	0.951116	1.03328	0.990327	nucleus
LmxM.26.0740	Regulator of chromosome condensation (RCC1) repeat, putative OS=Leishmania_mexicana_MHOM/GT/2001/U1103 GN=LmxM.26.0740	LmxM.26.0740	1.96819	0.0237148	Up	90.387	32.6	20	20	20	178210	168160	165260	35367	44485	45016	132480	134840	127710	107690	114070	111000	172210	187670	180710	224930	217250	236790	1.24147	1.17146	1.15126	0.246379	0.309898	0.313597	0.922903	0.939343	0.889673	0.750207	0.794652	0.773265	1.19968	1.30738	1.25889	1.56694	1.51344	1.64956	nucleus	K10595	HERC2; E3 ubiquitin-protein ligase HERC2 [EC:2.3.2.26]
LmxM.29.3470	casein kinase 1 isoform 2, putative OS=Leishmania_mexicana_MHOM/GT/2001/U1103 GN=LmxM.29.3470	LmxM.29.3470	1.6153	0.0242717	Up	43.921	19.1	6	5	5	113270	110660	110110	42849	41461	46655	94987	99714	87928	82384	77588	82962	132320	129530	120920	92562	106590	108110	1.21317	1.18522	1.17933	0.458933	0.444066	0.499697	1.01735	1.06798	0.941749	0.882371	0.831003	0.888561	1.41721	1.38733	1.29511	0.991382	1.14163	1.15791	cytoplasm	K08959	CSNK1D; casein kinase 1, delta [EC:2.7.11.1]
LmxM.29.3300	UV excision repair RAD23-like protein OS=Leishmania_mexicana_MHOM/GT/2001/U1103 GN=LmxM.29.3300	LmxM.29.3300	1.53152	0.0244206	Up	44.479	28	11	10	11	749170	678490	706450	306790	355920	284310	606510	598880	634500	694910	702530	689130	502950	475030	457630	894080	890290	914270	1.21031	1.09612	1.14129	0.495629	0.575	0.459312	0.979836	0.96751	1.02506	1.12265	1.13496	1.11331	0.812532	0.767426	0.739316	1.44441	1.43829	1.47703	nucleus	K10839	RAD23, HR23; UV excision repair protein RAD23
LmxM.20.1190	cysteine peptidase, Clan CA, family C2, putative OS=Leishmania_mexicana_MHOM/GT/2001/U1103 GN=LmxM.20.1190	LmxM.20.1190	3.63274	0.0252981	Up	78.263	45.6	25	25	25	298120	291160	299580	15308	13019	3933.7	151570	148840	156690	138300	145250	149720	354100	343170	359030	396710	407000	401660	1.31744	1.28669	1.3239	0.0676487	0.0575332	0.0173837	0.669814	0.65775	0.69244	0.611172	0.641885	0.661639	1.56483	1.51653	1.58662	1.75313	1.7986	1.775	nucleus	K08582	CAPN15; calpain-15 [EC:3.4.22.-]
LmxM.24.0440	Protein of unknown function (DUF3184), putative OS=Leishmania_mexicana_MHOM/GT/2001/U1103 GN=LmxM.24.0440	LmxM.24.0440	1.72168	0.0266858	Up	152.36	28.7	30	3	30	195750	196560	201070	64716	62031	68006	167180	163350	164020	200470	201940	202600	166320	175390	175400	293190	298500	304440	1.06743	1.07184	1.09644	0.352897	0.338255	0.370837	0.911633	0.890748	0.894402	1.09316	1.10118	1.10478	0.906944	0.956402	0.956457	1.59877	1.62772	1.66011	plasma membrane
LmxM.15.0300	Ecotin-like protein OS=Leishmania_mexicana_MHOM/GT/2001/U1103 GN=LmxM.15.0300	LmxM.15.0300	1.64711	0.0269863	Up	16.498	74.7	10	10	10	89560	57366	79889	0	0	0	41940	46316	49449	49813	61517	58950	131080	106560	120640	191060	187400	157880	0.939822	0.601985	0.838337				0.440109	0.486029	0.518906	0.522726	0.645545	0.618608	1.37552	1.11822	1.26597	2.00494	1.96653	1.65676	cytoplasm
LmxM.31.3990	GIPL galf transferase, putative OS=Leishmania_mexicana_MHOM/GT/2001/U1103 GN=LmxM.31.3990	LmxM.31.3990	1.5996	0.0273888	Up	67.083	11.7	5	5	5	78412	71895	75597	63561	66945	44763	38899	31529	36753	112870	107980	117530	48060	53871	54973	61995	73030	70942	1.16684	1.06986	1.12495	0.945844	0.996201	0.666113	0.578852	0.46918	0.546917	1.67961	1.60684	1.74895	0.715176	0.801648	0.818047	0.922541	1.08675	1.05568	Golgi apparatus
LmxM.21.1360	hypothetical protein, conserved OS=Leishmania_mexicana_MHOM/GT/2001/U1103 GN=LmxM.21.1360	LmxM.21.1360	1.70821	0.0274478	Up	38.208	56.3	13	13	13	380130	371830	383510	121070	128050	127650	321180	312190	319290	360940	367860	357490	409560	412770	405640	901470	862240	903370	0.918899	0.898835	0.927069	0.292666	0.309539	0.308572	0.776397	0.754665	0.771828	0.87251	0.889238	0.86417	0.990041	0.9978	0.980565	2.17915	2.08432	2.18374	extracellular
LmxM.20.1220	hypothetical protein, conserved OS=Leishmania_mexicana_MHOM/GT/2001/U1103 GN=LmxM.20.1220	LmxM.20.1220	2.12619	0.027874	Up	16.587	56.8	5	5	5	332300	321990	323890	60875	61378	52581	248240	262360	234690	197130	193540	198420	361040	360610	348960	473460	465760	473240	1.20339	1.16605	1.17293	0.220452	0.222274	0.190416	0.898974	0.950108	0.849905	0.713885	0.700884	0.718557	1.30747	1.30591	1.26372	1.71458	1.6867	1.71379	extracellular
LmxM.32.2910	hypothetical protein, conserved OS=Leishmania_mexicana_MHOM/GT/2001/U1103 GN=LmxM.32.2910	LmxM.32.2910	4.7791	0.0288318	Up	204.1	28.3	38	38	38	98945	96751	94116	5337.7	0	2881.6	31663	29015	32172	63053	62937	67177	138230	119790	116070	239190	234600	275850	0.984943	0.963103	0.936873	0.0531339		0.0286848	0.315188	0.288828	0.320255	0.627658	0.626503	0.66871	1.376	1.19244	1.15541	2.38101	2.33531	2.74594	mitochondria
LmxM.26.1470	farnesyltransferase beta subunit OS=Leishmania_mexicana_MHOM/GT/2001/U1103 GN=LmxM.26.1470	LmxM.26.1470	1.70442	0.0291198	Up	76.711	12.5	5	5	5	153820	159240	162490	50107	58040	48992	135280	145140	120460	90894	116790	121430	142160	121020	98206	80653	87901	70628	1.41029	1.45999	1.48978	0.459404	0.532138	0.449181	1.24031	1.33071	1.10443	0.833359	1.07079	1.11333	1.30339	1.10957	0.900398	0.739464	0.805917	0.64755	nucleus	K05954	FNTB; protein farnesyltransferase subunit beta [EC:2.5.1.58]
LmxM.30.0500	hypothetical protein, conserved OS=Leishmania_mexicana_MHOM/GT/2001/U1103 GN=LmxM.30.0500	LmxM.30.0500	1.6425	0.0298073	Up	67.017	18.6	7	7	7	55178	47104	53571	17661	21986	16949	45721	41485	45973	49106	44272	46030	80833	83771	83534	79670	89304	89491	1.00158	0.855021	0.972408	0.320578	0.399085	0.307654	0.829917	0.753026	0.834491	0.891361	0.803615	0.835526	1.46726	1.52059	1.51629	1.44615	1.62103	1.62442	nucleus
LmxM.20.1180	calpain-like cysteine peptidase OS=Leishmania_mexicana_MHOM/GT/2001/U1103 GN=LmxM.20.1180	LmxM.20.1180	1.76688	0.0301731	Up	103.53	48	33	4	33	1808700	1822000	1814000	534350	511140	562760	1539300	1490700	1524800	1584000	1608300	1628300	1766900	1779200	1775800	5496200	5260700	5338700	0.860242	0.866568	0.862763	0.254144	0.243105	0.267656	0.732112	0.708997	0.725216	0.753372	0.764929	0.774442	0.840362	0.846212	0.844595	2.61407	2.50206	2.53916	cytoplasm	K08585	CAPNN; calpain, invertebrate [EC:3.4.22.-]
LmxM.31.1930	hypothetical protein, conserved OS=Leishmania_mexicana_MHOM/GT/2001/U1103 GN=LmxM.31.1930	LmxM.31.1930	1.53618	0.0313641	Up	84.735	21.2	11	11	11	257850	256280	240580	111870	102380	101150	210790	225350	231040	231800	231920	225020	188960	200480	186720	283900	267330	260060	1.21708	1.20967	1.13556	0.528037	0.483244	0.477438	0.994949	1.06367	1.09053	1.09412	1.09469	1.06212	0.89191	0.946285	0.881337	1.34004	1.26182	1.22751	nucleus
LmxM.04.0130	hypothetical protein OS=Leishmania_mexicana_MHOM/GT/2001/U1103 GN=LmxM.04.0130	LmxM.04.0130	3.38435	0.0315433	Up	63.193	33.1	11	11	11	380360	409140	352250	28783	23553	77908	157670	214540	172270	145790	133500	131730	770030	733070	802920	3116600	3055100	3088400	0.496351	0.533908	0.459669	0.0375604	0.0307355	0.101666	0.205752	0.279964	0.224804	0.190249	0.174211	0.171901	1.00485	0.956621	1.04777	4.06701	3.98676	4.03021	plasma membrane
LmxM.36.2845	hypothetical protein, conserved OS=Leishmania_mexicana_MHOM/GT/2001/U1103 GN=LmxM.36.2845	LmxM.36.2845	1.50521	0.0324046	Up	10.079	72.8	4	4	4	246960	194720	207130	117630	95403	125610	179960	175700	167780	117450	110570	132650	0	0	385820	242620	264790	264160	1.30453	1.02858	1.09413	0.621363	0.503952	0.663516	0.950612	0.928109	0.886273	0.620412	0.58407	0.700704			2.03804	1.2816	1.39871	1.39539	extracellular
LmxM.24.0890	DNA polymerase theta OS=Leishmania_mexicana_MHOM/GT/2001/U1103 GN=LmxM.24.0890	LmxM.24.0890	1.74644	0.0348788	Up	125.82	13.4	10	10	10	65891	56355	51905	36487	55632	36890	28004	18336	24086	44960	41276	53031	37462	39168	36419	22989	30779	29213	1.67311	1.43097	1.31797	0.92648	1.41261	0.936713	0.711079	0.465589	0.611593	1.14163	1.04808	1.34657	0.951237	0.994556	0.924753	0.583738	0.781542	0.741778	mitochondria	K02349	POLQ; DNA polymerase theta [EC:2.7.7.7]
LmxM.21.0960	hypothetical protein, conserved OS=Leishmania_mexicana_MHOM/GT/2001/U1103 GN=LmxM.21.0960	LmxM.21.0960	1.51538	0.0351947	Up	150.01	7	7	7	7	62960	35457	64550	35570	41088	41348	32095	34524	30459	45168	34003	38167	44663	18695	33154	54174	0	0	1.5592	0.87809	1.59858	0.880888	1.01754	1.02398	0.79483	0.854984	0.754315	1.11858	0.842082	0.945203	1.10608	0.46298	0.821056	1.34162			nucleus
LmxM.19.1410	Cid1 family poly A polymerase, putative OS=Leishmania_mexicana_MHOM/GT/2001/U1103 GN=LmxM.19.1410	LmxM.19.1410	1.73248	0.0406842	Up	104.66	28.4	19	19	19	461100	427950	440230	120260	119650	128370	386380	393800	386080	438970	426990	432110	385720	393760	371530	415010	420970	429940	1.26159	1.17089	1.20449	0.329038	0.327369	0.351227	1.05716	1.07746	1.05634	1.20105	1.16827	1.18228	1.05535	1.07735	1.01653	1.13549	1.1518	1.17634	nucleus	K13291	TUT; terminal uridylyltransferase [EC:2.7.7.52]
LmxM.16.1350	DNA-directed rna polymerase I largest subunit, putative OS=Leishmania_mexicana_MHOM/GT/2001/U1103 GN=LmxM.16.1350	LmxM.16.1350	1.5016	0.048394	Up	200.17	41.4	51	51	51	285530	291300	289280	115550	116180	113380	269420	268540	270510	331430	316350	321940	254830	251600	251650	353960	352240	341770	1.07175	1.09341	1.08583	0.433723	0.436087	0.425578	1.01128	1.00798	1.01537	1.24404	1.18744	1.20842	0.956517	0.944393	0.944581	1.32861	1.32215	1.28285	nucleus	K02999	RPA1, POLR1A; DNA-directed RNA polymerase I subunit RPA1 [EC:2.7.7.6]
LmxM.24.1830	hypothetical protein, conserved OS=Leishmania_mexicana_MHOM/GT/2001/U1103 GN=LmxM.24.1830	LmxM.24.1830	1.65362	0.0499956	Up	28.816	8.3	2	2	2	3999300	3699100	4425600	2894500	2799200	0	0	1638100	0	0	0	0	0	0	6427000	2202300	0	0	1.13919	1.05368	1.26063	0.824494	0.797348			0.46661							1.83072	0.627322			mitochondria
[truncated: 9 more columns]

## Sheet: DAC1 vs Control Downreg PTN
DAC1-/+ Downregulated proteins compared to Cas9 parasites
Protein accession	Protein description	Gene name	Dac1/control Ratio	Dac1/control P value	Regulated Type	MW [kDa]	Coverage [%]	Peptides	Unique peptides	Razor + unique peptides	LFQ intensity Dac1_1	LFQ intensity Dac1_2	LFQ intensity Dac1_3	LFQ intensity WT_1	LFQ intensity WT_2	LFQ intensity WT_3	LFQ intensity Cas9_1	LFQ intensity Cas9_2	LFQ intensity Cas9_3	LFQ intensity Dac3_1	LFQ intensity Dac3_2	LFQ intensity Dac3_3	LFQ intensity Dac4_1	LFQ intensity Dac4_2	LFQ intensity Dac4_3	LFQ intensity Dac5_1	LFQ intensity Dac5_2	LFQ intensity Dac5_3	Dac1_1	Dac1_2	Dac1_3	WT_1	WT_2	WT_3	Cas9_1	Cas9_2	Cas9_3	Dac3_1	Dac3_2	Dac3_3	Dac4_1	Dac4_2	Dac4_3	Dac5_1	Dac5_2	Dac5_3	Subcellular localization	KEGG KO No.	KEGG Gene
LmxM.02.0460	Mitochondrial outer membrane protein porin, putative OS=Leishmania_mexicana_MHOM/GT/2001/U1103 GN=LmxM.02.0460	LmxM.02.0460	0.624301	6.61393e-08	Down	31.964	63.9	15	15	15	2448700	2536000	2516500	4067500	4163000	4223300	3851900	3845400	3879600	2440800	2493400	2431700	2724900	2656000	2648300	1965900	1962700	1879400	0.835813	0.865611	0.858955	1.38836	1.42095	1.44154	1.31477	1.31255	1.32422	0.833117	0.85107	0.83001	0.930088	0.906571	0.903942	0.671019	0.669927	0.641494	extracellular
LmxM.34.0100	ubiquinol-cytochrome c reductase complex 14kD subunit, putative OS=Leishmania_mexicana_MHOM/GT/2001/U1103 GN=LmxM.34.0100	LmxM.34.0100	0.665542	1.85493e-07	Down	24.239	54.5	9	9	9	1676100	1646800	1567100	2428700	2393600	2405600	2521100	2537300	2408500	1628900	1598500	1617100	2209200	2233500	2220500	1961500	2066800	2067800	0.811265	0.797083	0.758507	1.17554	1.15855	1.16436	1.22026	1.2281	1.16576	0.788419	0.773705	0.782708	1.0693	1.08106	1.07476	0.949404	1.00037	1.00086	mitochondria
LmxM.34.2740	galactokinase-like protein OS=Leishmania_mexicana_MHOM/GT/2001/U1103 GN=LmxM.34.2740	LmxM.34.2740	0.526491	1.97374e-07	Down	53.301	64.9	30	30	30	1430000	1425500	1504000	2874100	2874800	2904200	2636000	2670100	2601400	1382000	1333300	1363100	1589600	1547900	1517600	1163800	1159100	1151300	0.776991	0.774546	0.817199	1.56164	1.56202	1.578	1.43227	1.4508	1.41347	0.75091	0.724449	0.740641	0.86371	0.841052	0.824588	0.632351	0.629797	0.625559	cytoplasm	K00849	galK; galactokinase [EC:2.7.1.6]
LmxM.29.1625	Protein of unknown function (DUF1077), putative OS=Leishmania_mexicana_MHOM/GT/2001/U1103 GN=LmxM.29.1625	LmxM.29.1625	0.295505	4.4929e-07	Down	16.978	22.7	4	4	4	139910	107710	140980	397480	448540	436960	416590	469210	461290	167630	198960	200510	304000	0	308300	252250	261050	295360	0.475055	0.365722	0.478688	1.34962	1.52299	1.48367	1.4145	1.59317	1.56628	0.569176	0.675555	0.680818	1.03221		1.04681	0.856497	0.886377	1.00287	plasma membrane	K23565	EMC4, TMEM85; ER membrane protein complex subunit 4
LmxM.36.0260	xylulokinase, putative OS=Leishmania_mexicana_MHOM/GT/2001/U1103 GN=LmxM.36.0260	LmxM.36.0260	0.655197	4.80281e-07	Down	53.708	49.7	18	18	18	169800	168140	173700	246890	255500	245620	267970	269200	276610	139110	133000	147120	202090	199580	209740	201310	209270	208040	0.821019	0.812993	0.839877	1.19377	1.2354	1.18763	1.29569	1.30164	1.33747	0.672627	0.643083	0.711357	0.977148	0.965012	1.01414	0.973377	1.01187	1.00592	cytoplasm	K11214	SHPK; sedoheptulokinase [EC:2.7.1.14]
LmxM.34.2150	short chain dehydrogenase, putative OS=Leishmania_mexicana_MHOM/GT/2001/U1103 GN=LmxM.34.2150	LmxM.34.2150	0.543114	6.24345e-07	Down	48.175	57	19	19	19	806310	788480	764550	1562100	1527300	1545000	1329200	1383800	1340800	861210	870680	831830	995810	992800	994440	1198400	1234300	1212300	0.717099	0.701241	0.679959	1.38927	1.35832	1.37406	1.18214	1.23069	1.19245	0.765924	0.774347	0.739795	0.885632	0.882955	0.884414	1.06581	1.09774	1.07817	plasma membrane	K11169	DHRS13; dehydrogenase/reductase SDR family member 13 [EC:1.1.-.-]
LmxM.10.0390	GP63, leishmanolysin OS=Leishmania_mexicana_MHOM/GT/2001/U1103 GN=LmxM.10.0390	LmxM.10.0390	0.374653	6.69769e-07	Down	63.793	42.5	20	5	6	153250	147080	183680	408370	442610	459580	451190	433550	388480	215330	224930	207360	201930	212500	218430	104140	0	0	0.550713	0.528541	0.660065	1.4675	1.59055	1.65153	1.62138	1.55799	1.39603	0.773801	0.808299	0.74516	0.725647	0.763631	0.784941	0.374233			extracellular	K13539	LMLN; leishmanolysin-like peptidase [EC:3.4.24.-]
LmxM.30.1570	cytochrome c oxidase VIII (COX VIII), putative OS=Leishmania_mexicana_MHOM/GT/2001/U1103 GN=LmxM.30.1570	LmxM.30.1570	0.451939	7.7651e-07	Down	18.842	43.3	6	6	6	333320	318170	313270	779440	760310	785220	641190	653590	649680	436560	453460	438760	426780	419290	410530	824550	820660	813630	0.583725	0.557193	0.548612	1.36499	1.33149	1.37511	1.12288	1.1446	1.13775	0.764523	0.794119	0.768376	0.747396	0.734279	0.718938	1.44399	1.43718	1.42486	mitochondria
LmxM.16.0570	histone H3 OS=Leishmania_mexicana_MHOM/GT/2001/U1103 GN=LmxM.16.0570	LmxM.16.0570	0.506279	3.58339e-06	Down	14.676	56.2	9	9	9	7981500	9017000	7295800	16181000	16832000	17062000	14702000	15381000	15814000	10310000	9903300	9644300	12141000	11291000	12541000	15430000	15918000	15279000	0.617328	0.697419	0.564293	1.25152	1.30187	1.31966	1.13712	1.18964	1.22313	0.797426	0.765969	0.745937	0.939044	0.873301	0.969982	1.19343	1.23118	1.18175	nucleus	K11253	H3; histone H3
LmxM.34.0720	hypothetical protein, conserved OS=Leishmania_mexicana_MHOM/GT/2001/U1103 GN=LmxM.34.0720	LmxM.34.0720	0.56689	3.9093e-06	Down	55.052	36.5	11	11	11	40867	40214	33935	69753	68960	70480	65955	64892	65739	58369	56722	57064	68198	65046	65513	73273	72028	73491	0.66241	0.651826	0.55005	1.13062	1.11777	1.14241	1.06906	1.05183	1.06556	0.946099	0.919403	0.924946	1.10542	1.05433	1.0619	1.18768	1.1675	1.19121	cytoplasm,nucleus
LmxM.32.1460	RNA recognition motif. (a.k.a. RRM, RBD, or RNP domain), putative OS=Leishmania_mexicana_MHOM/GT/2001/U1103 GN=LmxM.32.1460partial	LmxM.32.1460partial	0.360468	4.08155e-06	Down	18.731	74.1	7	7	7	134800	115200	127230	407510	386270	392670	294060	300020	312470	154610	155790	176660	227970	215090	225360	115770	118840	121470	0.609374	0.520771	0.575153	1.84218	1.74616	1.7751	1.32932	1.35626	1.41255	0.698927	0.704261	0.798606	1.03056	0.972332	1.01876	0.523348	0.537226	0.549115	nucleus
LmxM.34.0620	hypothetical protein, unknown function OS=Leishmania_mexicana_MHOM/GT/2001/U1103 GN=LmxM.34.0620	LmxM.34.0620	0.488627	5.39542e-06	Down	41.03	38.2	11	11	11	127380	114690	114420	258010	226260	265190	214050	233510	262130	133140	156540	160480	174630	154390	150740	143900	135250	137250	0.725133	0.652893	0.651355	1.46877	1.28802	1.50964	1.21852	1.3293	1.49222	0.757922	0.891131	0.91356	0.994111	0.878892	0.858113	0.819175	0.769934	0.781319	plasma membrane
LmxM.28.2170	Mitochondrial import receptor subunit ATOM69, putative OS=Leishmania_mexicana_MHOM/GT/2001/U1103 GN=LmxM.28.2170	LmxM.28.2170	0.503796	5.83279e-06	Down	71.336	36.6	15	15	15	92756	88574	90516	178460	159590	160790	196160	191900	192290	129910	127740	136080	110960	112740	109600	118310	130600	117590	0.682987	0.652194	0.666494	1.31405	1.1751	1.18394	1.44438	1.41301	1.41588	0.956562	0.940584	1.00199	0.817028	0.830135	0.807014	0.871148	0.961643	0.865847	cytoplasm
LmxM.17.1120	hypothetical protein, conserved OS=Leishmania_mexicana_MHOM/GT/2001/U1103 GN=LmxM.17.1120	LmxM.17.1120	0.624111	6.88347e-06	Down	13.964	28	2	2	2	20593	17341	19316	31310	28632	31817	31201	30023	30478	19250	16868	17904	29164	30222	30897	0	15473	19567	0.833415	0.701804	0.781734	1.26714	1.15876	1.28766	1.26273	1.21505	1.23347	0.779063	0.682661	0.724589	1.18029	1.22311	1.25043		0.626205	0.791892	mitochondria
LmxM.26.0680	Protein of unknown function (DUF2012), putative OS=Leishmania_mexicana_MHOM/GT/2001/U1103 GN=LmxM.26.0680	LmxM.26.0680	0.65806	8.50491e-06	Down	25.692	40.4	7	7	7	488020	453930	483050	680220	676680	701970	753540	760610	757890	450270	475500	451770	493940	469140	511930	500960	461420	506170	0.871723	0.81083	0.862845	1.21504	1.20872	1.25389	1.34601	1.35864	1.35378	0.804292	0.849359	0.806972	0.882297	0.837999	0.914432	0.894837	0.824209	0.904143	extracellular
LmxM.26.2230	GDP-mannose 4,6 dehydratase, putative OS=Leishmania_mexicana_MHOM/GT/2001/U1103 GN=LmxM.26.2230	LmxM.26.2230	0.609792	8.60556e-06	Down	47.632	37.6	13	13	13	87873	89762	81621	146980	143850	125320	145220	138850	150090	117570	131180	129050	125190	129400	114430	148170	143740	153420	0.687189	0.701961	0.638297	1.14942	1.12494	0.980034	1.13566	1.08584	1.17374	0.919427	1.02586	1.0092	0.979017	1.01194	0.894871	1.15873	1.12408	1.19978	cytoplasm,nucleus	K01710	rfbB, rmlB, rffG; dTDP-glucose 4,6-dehydratase [EC:4.2.1.46]
LmxM.34.0980	aldose 1-epimerase-like protein OS=Leishmania_mexicana_MHOM/GT/2001/U1103 GN=LmxM.34.0980	LmxM.34.0980	0.490434	8.84007e-06	Down	41.926	71.6	18	12	18	774770	743810	785260	1760000	1749200	1691300	1413000	1398800	1382800	991580	1005000	1007300	951050	959940	979620	1149300	1101200	1107000	0.665644	0.639045	0.674656	1.5121	1.50283	1.45308	1.21398	1.20178	1.18803	0.851916	0.863446	0.865422	0.817095	0.824733	0.841641	0.987422	0.946096	0.951079	cytoplasm	K01785	galM, GALM; aldose 1-epimerase [EC:5.1.3.3]
LmxM.30.2960	Repressor of differentiation kinase 2, putative OS=Leishmania_mexicana_MHOM/GT/2001/U1103 GN=LmxM.30.2960	LmxM.30.2960	0.622535	8.96712e-06	Down	49.798	54.6	20	19	20	339540	330190	343750	595510	571330	578310	510380	507010	493440	364160	349710	357340	398460	406850	407790	564920	531430	565500	0.743915	0.723429	0.753139	1.30473	1.25175	1.26705	1.11822	1.11083	1.0811	0.797856	0.766197	0.782914	0.873005	0.891387	0.893447	1.23771	1.16434	1.23898	cytoplasm	K08857	NEK1_4_5; serine/threonine-protein kinase Nek1/4/5 [EC:2.7.11.1]
LmxM.29.0770	hypothetical protein, conserved OS=Leishmania_mexicana_MHOM/GT/2001/U1103 GN=LmxM.29.0770	LmxM.29.0770	0.564725	9.09844e-06	Down	14.496	61.3	5	5	5	157340	139100	130910	239080	238300	239690	259910	273730	262770	192760	195530	198200	152180	153680	149680	285900	290140	301760	0.733584	0.648542	0.610357	1.11469	1.11105	1.11753	1.21181	1.27624	1.22514	0.898727	0.911642	0.924091	0.709526	0.71652	0.69787	1.33298	1.35275	1.40693	cytoplasm
LmxM.25.1120	aldehyde dehydrogenase, mitochondrial precursor OS=Leishmania_mexicana_MHOM/GT/2001/U1103 GN=LmxM.25.1120	LmxM.25.1120	0.462691	9.44403e-06	Down	54.259	68.9	34	34	34	2712600	2552900	2646100	6430400	6316200	6349800	5151100	4988400	4962300	2628200	2625600	2573900	2757300	2716600	2733500	4407100	4394500	4311500	0.685211	0.644871	0.668413	1.62434	1.59549	1.60398	1.30118	1.26009	1.25349	0.663892	0.663235	0.650175	0.696503	0.686222	0.690491	1.11325	1.11006	1.0891	cytoplasm	K00128	ALDH; aldehyde dehydrogenase (NAD+) [EC:1.2.1.3]
LmxM.34.1460	hypothetical protein, conserved OS=Leishmania_mexicana_MHOM/GT/2001/U1103 GN=LmxM.34.1460	LmxM.34.1460	0.584194	9.53828e-06	Down	35.732	40.1	13	13	13	373280	391450	395090	703840	716960	738680	601160	605140	604890	424380	422350	428270	430020	430530	401140	470310	469400	456270	0.741357	0.777444	0.784673	1.39787	1.42393	1.46706	1.19394	1.20185	1.20135	0.842845	0.838813	0.850571	0.854046	0.855059	0.796689	0.934065	0.932258	0.906181	plasma membrane
LmxM.36.1770	hypothetical protein, conserved OS=Leishmania_mexicana_MHOM/GT/2001/U1103 GN=LmxM.36.1770	LmxM.36.1770	0.610754	9.91672e-06	Down	12.156	19.8	2	2	2	183780	187090	203630	315220	326580	315710	275600	319600	328570	498990	476220	495960	478230	390960	413010	256950	286780	228170	0.553087	0.563048	0.612826	0.948656	0.982844	0.950131	0.82942	0.961838	0.988833	1.50171	1.43319	1.49259	1.43924	1.1766	1.24296	0.773292	0.863066	0.686679	mitochondria
LmxM.07.1070	RNA-editing complex protein, putative OS=Leishmania_mexicana_MHOM/GT/2001/U1103 GN=LmxM.07.1070	LmxM.07.1070	0.610192	1.10128e-05	Down	51.872	20.9	7	7	7	73139	69241	66989	121330	124560	115960	113170	104820	106400	87392	72649	74192	113750	107060	110560	169670	171500	164710	0.669263	0.633594	0.612987	1.11024	1.13979	1.0611	1.03557	0.959162	0.97362	0.799686	0.664779	0.678899	1.04088	0.979659	1.01169	1.55258	1.56932	1.50719	nucleus
LmxM.31.1050	vacuolar sorting-like protein OS=Leishmania_mexicana_MHOM/GT/2001/U1103 GN=LmxM.31.1050	LmxM.31.1050	0.603683	1.15245e-05	Down	22.427	60.5	8	8	8	129080	147210	136270	226110	218940	204430	242810	239150	235370	145590	152650	131800	196980	194360	192790	222460	219140	219600	0.672537	0.766998	0.709998	1.17809	1.14073	1.06513	1.2651	1.24603	1.22633	0.758558	0.795342	0.686709	1.02631	1.01266	1.00448	1.15907	1.14177	1.14417	cytoplasm	K18467	VPS29; vacuolar protein sorting-associated protein 29
LmxM.26.0280	hypothetical protein, conserved OS=Leishmania_mexicana_MHOM/GT/2001/U1103 GN=LmxM.26.0280	LmxM.26.0280	0.563522	1.36105e-05	Down	22.264	49.5	6	6	6	94885	78764	99510	171950	163660	155210	166730	152400	159520	107530	112510	117100	148520	142490	145490	159090	150030	152260	0.689335	0.572217	0.722935	1.24921	1.18898	1.12759	1.21129	1.10718	1.15891	0.7812	0.81738	0.850726	1.07899	1.03518	1.05698	1.15578	1.08996	1.10616	cytoplasm
LmxM.23.0070	agmatinase-like protein OS=Leishmania_mexicana_MHOM/GT/2001/U1103 GN=LmxM.23.0070	LmxM.23.0070	0.651654	1.40883e-05	Down	36.592	34.6	9	9	9	1600600	1713000	1918400	2787200	2732000	2659700	2714700	2518800	2645200	1685900	1731800	1791000	2376800	2272200	2340400	2904300	3002000	2866200	0.681748	0.729623	0.817109	1.18716	1.16365	1.13285	1.15628	1.07284	1.12668	0.71808	0.73763	0.762845	1.01236	0.967804	0.996853	1.23704	1.27865	1.22081	mitochondria	K01476	E3.5.3.1, rocF, arg; arginase [EC:3.5.3.1]
LmxM.13.1150	hypothetical protein, conserved OS=Leishmania_mexicana_MHOM/GT/2001/U1103 GN=LmxM.13.1150	LmxM.13.1150	0.613519	1.48865e-05	Down	35.964	57.8	12	12	12	95943	91236	95592	165780	142540	170050	148500	151940	142990	108100	105450	122290	157620	144430	151470	89566	87331	78745	0.76769	0.730027	0.764881	1.32649	1.14054	1.36066	1.18823	1.21575	1.14414	0.864964	0.84376	0.978506	1.2612	1.15566	1.21199	0.716664	0.698781	0.63008	cytoplasm
LmxM.18.1290	mitochondrial carrier protein, putative OS=Leishmania_mexicana_MHOM/GT/2001/U1103 GN=LmxM.18.1290	LmxM.18.1290	0.579387	1.9747e-05	Down	34.689	43.1	14	3	3	76145	71350	78825	144820	137150	136540	125740	119170	117820	79607	81187	74891	85518	86002	99794	55814	55178	50784	0.817623	0.766136	0.8464	1.55504	1.47268	1.46613	1.35016	1.27961	1.26512	0.854797	0.871763	0.804158	0.918268	0.923465	1.07156	0.599315	0.592485	0.545304	extracellular	K15104	SLC25A11, OGC; solute carrier family 25 (mitochondrial oxoglutarate transporter), member 11
LmxM.10.0945	Archaic translocase of outer membrane 12 kDa subunit, putative OS=Leishmania_mexicana_MHOM/GT/2001/U1103 GN=LmxM.10.0945	LmxM.10.0945	0.599048	2.11401e-05	Down	11.887	48.6	7	7	7	638830	646970	637060	1046700	949930	984690	1165800	1142400	1130200	888420	959470	962440	906570	907020	903890	1060900	1013200	1021500	0.677764	0.6864	0.675886	1.11049	1.00782	1.0447	1.23685	1.21202	1.19908	0.942566	1.01795	1.0211	0.961822	0.962299	0.958979	1.12556	1.07495	1.08376	plasma membrane
LmxM.34.2800	Alpha/beta hydrolase family, putative OS=Leishmania_mexicana_MHOM/GT/2001/U1103 GN=LmxM.34.2800	LmxM.34.2800	0.494066	2.18531e-05	Down	44.156	29.2	8	8	8	166260	210170	189980	391150	386350	448830	354600	361240	350680	293500	264180	271910	288510	300450	287620	395700	343200	334990	0.530681	0.670836	0.606392	1.2485	1.23318	1.43261	1.13184	1.15303	1.11933	0.936815	0.843229	0.867903	0.920888	0.958999	0.918047	1.26302	1.09545	1.06925	plasma membrane	K13704	ABHD12; abhydrolase domain-containing protein 12 [EC:3.1.1.23]
LmxM.30.2330	3,2-trans-enoyl-CoA isomerase, mitochondrial precursor, putative OS=Leishmania_mexicana_MHOM/GT/2001/U1103 GN=LmxM.30.2330	LmxM.30.2330	0.507132	2.37666e-05	Down	38.361	52.2	11	9	9	68306	63665	71029	143480	147080	144820	121240	131420	112540	93197	85245	87950	87617	82683	91545	197180	194650	211510	0.57584	0.536715	0.598795	1.20958	1.23993	1.22088	1.02209	1.10791	0.948745	0.785678	0.71864	0.741444	0.738637	0.697042	0.771751	1.66229	1.64096	1.78309	mitochondria	K13238	ECI1, DCI; Delta3-Delta2-enoyl-CoA isomerase [EC:5.3.3.8]
LmxM.25.0860	hypothetical protein, conserved OS=Leishmania_mexicana_MHOM/GT/2001/U1103 GN=LmxM.25.0860	LmxM.25.0860	0.486584	2.71861e-05	Down	128.67	10.2	9	9	9	86667	82152	78042	190480	180090	185060	162080	138680	158280	67758	58125	63126	114270	120630	97436	48460	158690	124780	0.737659	0.69923	0.664248	1.62126	1.53282	1.57512	1.37953	1.18036	1.34719	0.576717	0.494726	0.537292	0.9726	1.02673	0.829319	0.412463	1.35068	1.06205	plasma membrane
LmxM.33.2800	tuzin, putative OS=Leishmania_mexicana_MHOM/GT/2001/U1103 GN=LmxM.33.2800	LmxM.33.2800	0.522577	2.71897e-05	Down	61.762	17.2	5	5	5	17817	13632	18333	32113	32960	30258	30259	30938	33997	23420	19555	19636	34027	33127	34865	26573	29302	30521	0.652726	0.499409	0.67163	1.17646	1.20749	1.1085	1.10854	1.13341	1.24548	0.857992	0.716398	0.719365	1.24658	1.21361	1.27728	0.973503	1.07348	1.11814	cytoplasm
LmxM.33.4330	quinonoid dihydropteridine reductase OS=Leishmania_mexicana_MHOM/GT/2001/U1103 GN=LmxM.33.4330	LmxM.33.4330	0.665219	2.72649e-05	Down	23.67	54.6	6	6	6	218400	222960	244690	323050	332520	334560	337000	354310	381190	269000	292790	279690	286930	279980	283000	362820	351240	381130	0.710211	0.725039	0.795702	1.05052	1.08132	1.08795	1.09588	1.15217	1.23958	0.874756	0.952118	0.909518	0.933062	0.910461	0.920282	1.17985	1.14219	1.23939	mitochondria	K00357	QDPR; dihydropteridine reductase [EC:1.5.1.34]
LmxM.36.6170	hypothetical protein, conserved OS=Leishmania_mexicana_MHOM/GT/2001/U1103 GN=LmxM.36.6170	LmxM.36.6170	0.588608	2.84349e-05	Down	52.389	33	9	9	9	53792	58301	55676	95615	105820	82123	89496	99431	97568	70071	76496	77639	81950	86617	81899	91607	105770	97534	0.642333	0.696175	0.66483	1.14174	1.2636	0.980635	1.06868	1.18731	1.16506	0.836721	0.913443	0.927091	0.978569	1.0343	0.97796	1.09388	1.263	1.16466	nucleus
LmxM.06.0160	HD domain containing protein, putative OS=Leishmania_mexicana_MHOM/GT/2001/U1103 GN=LmxM.06.0160	LmxM.06.0160	0.548447	3.47823e-05	Down	51.213	23.6	8	8	8	38622	35266	44431	68322	63470	73407	79291	70722	76257	35549	40660	40598	60881	58993	60109	60660	56382	61632	0.678073	0.619153	0.78006	1.19951	1.11432	1.28878	1.39209	1.24164	1.33882	0.624122	0.713854	0.712765	1.06887	1.03572	1.05531	1.06499	0.98988	1.08205	mitochondria	K22544	SAMHD1; deoxynucleoside triphosphate triphosphohydrolase SAMHD1 [EC:3.1.5.-]
LmxM.15.0660	hypothetical protein, conserved OS=Leishmania_mexicana_MHOM/GT/2001/U1103 GN=LmxM.15.0660	LmxM.15.0660	0.644143	4.32355e-05	Down	50.447	15.1	5	5	5	82992	80336	85672	113640	136850	142050	125580	130860	124140	174010	127330	127280	163170	123580	139890	129180	127180	107300	0.666591	0.645258	0.688116	0.912755	1.09918	1.14094	1.00866	1.05107	0.997091	1.39765	1.02271	1.02231	1.31058	0.992593	1.12359	1.03757	1.02151	0.861832	nucleus
LmxM.20.0220	hypothetical protein, conserved OS=Leishmania_mexicana_MHOM/GT/2001/U1103 GN=LmxM.20.0220	LmxM.20.0220	0.647487	5.25603e-05	Down	101.4	16.5	10	10	10	238750	239390	255900	403600	412490	423390	341120	351850	334900	232850	237760	232480	279930	291360	330870	237180	232080	226990	0.810407	0.81258	0.868621	1.36997	1.40015	1.43714	1.15789	1.19431	1.13678	0.79038	0.807047	0.789124	0.950188	0.988985	1.1231	0.805078	0.787767	0.770489	cytoplasm
LmxM.30.2580	ubiquinol-cytochrome-c reductase-like protein OS=Leishmania_mexicana_MHOM/GT/2001/U1103 GN=LmxM.30.2580	LmxM.30.2580	0.233572	5.29616e-05	Down	14.784	39.3	4	4	4	58389	37606	0	163780	189790	196490	223150	226060	233690	75891	87185	0	158740	148440	147630	275830	262590	270060	0.339062	0.218376		0.951062	1.1021	1.14101	1.29582	1.31272	1.35703	0.440695	0.506279		0.921795	0.861983	0.857279	1.60173	1.52485	1.56822	extracellular
LmxM.34.1570	methyltransferase domain containing protein, putative OS=Leishmania_mexicana_MHOM/GT/2001/U1103 GN=LmxM.34.1570	LmxM.34.1570	0.629239	5.34281e-05	Down	40.105	44.5	13	13	13	259210	315440	283670	416310	432430	438240	479900	480590	480650	293350	300940	295090	416920	405640	371280	400780	422770	442360	0.672732	0.818667	0.736213	1.08046	1.12229	1.13737	1.24549	1.24728	1.24744	0.761336	0.781035	0.765852	1.08204	1.05276	0.963589	1.04015	1.09722	1.14806	cytoplasm
LmxM.29.2050	ferric reductase transmembrane protein-like protein OS=Leishmania_mexicana_MHOM/GT/2001/U1103 GN=LmxM.29.2050	LmxM.29.2050	0.288405	5.54647e-05	Down	24.815	35.8	6	6	6	56284	64923	66427	215250	283650	229140	176100	180180	0	49226	90979	44971	71626	83974	88857	0	0	0	0.463083	0.534161	0.546536	1.77099	2.33376	1.88528	1.44888	1.48245		0.405012	0.74854	0.370004	0.589311	0.690906	0.731081				plasma membrane
LmxM.11.0750	hypothetical protein, conserved OS=Leishmania_mexicana_MHOM/GT/2001/U1103 GN=LmxM.11.0750	LmxM.11.0750	0.66562	5.75587e-05	Down	21.919	27.3	8	8	8	558910	674000	679550	934240	983530	1022500	942870	924740	938520	857280	885390	874900	520990	544830	507070	1118900	1209900	1156900	0.65604	0.79113	0.797645	1.0966	1.15445	1.20019	1.10673	1.08544	1.10162	1.00626	1.03926	1.02694	0.61153	0.639513	0.595191	1.31335	1.42016	1.35795	nucleus
LmxM.21.0023	ring-box protein 1, putative OS=Leishmania_mexicana_MHOM/GT/2001/U1103 GN=LmxM.21.0023	LmxM.21.0023	0.377394	5.89922e-05	Down	12.167	65.1	5	5	5	163900	98542	140530	358660	311130	334440	333930	396020	401370	144020	148590	136570	312560	298870	293350	343990	317030	352640	0.603789	0.363018	0.517697	1.32126	1.14617	1.23204	1.23016	1.45889	1.4786	0.530554	0.547389	0.503109	1.15144	1.101	1.08067	1.26722	1.1679	1.29909	extracellular	K03868	RBX1, ROC1; E3 ubiquitin-protein ligase RBX1 [EC:2.3.2.32]
LmxM.26.0070	hypothetical protein, conserved OS=Leishmania_mexicana_MHOM/GT/2001/U1103 GN=LmxM.26.0070	LmxM.26.0070	0.635992	6.1843e-05	Down	40.102	43.5	10	10	10	235500	248430	223560	410030	399000	405540	340090	346040	324140	288410	299470	301850	287440	275830	286140	283040	287280	288680	0.766481	0.808564	0.72762	1.33452	1.29862	1.31991	1.10689	1.12626	1.05498	0.938687	0.974684	0.98243	0.93553	0.897743	0.931299	0.921209	0.935009	0.939566	mitochondria
LmxM.33.3050	cytochrome b5-like Heme/Steroid binding domain containing protein, putative OS=Leishmania_mexicana_MHOM/GT/2001/U1103 GN=LmxM.33.3050	LmxM.33.3050	0.645444	6.4854e-05	Down	19.89	46.1	7	7	7	716260	707240	735350	1131400	1203000	1285100	1010100	1051500	1008400	657720	596100	654770	690470	750170	724350	658790	687850	679530	0.862496	0.851635	0.885484	1.36239	1.44861	1.54747	1.21633	1.26618	1.21428	0.792004	0.717804	0.788452	0.831441	0.90333	0.872238	0.793293	0.828286	0.818267	extracellular	K17278	PGRMC1_2; membrane-associated progesterone receptor component
LmxM.18.0350	ATP12 chaperone protein, putative OS=Leishmania_mexicana_MHOM/GT/2001/U1103 GN=LmxM.18.0350	LmxM.18.0350	0.625922	7.0155e-05	Down	33.711	39.8	8	8	8	236810	215980	221710	395600	411980	379110	307220	332690	328620	293880	319930	296670	352350	325200	349240	258410	258900	254180	0.76963	0.701933	0.720555	1.2857	1.33893	1.2321	0.998462	1.08124	1.06801	0.955107	1.03977	0.964174	1.14513	1.0569	1.13503	0.83983	0.841422	0.826082	cytoplasm
LmxM.26.0240	Eukaryotic translation initiation factor 4E type 6, putative OS=Leishmania_mexicana_MHOM/GT/2001/U1103 GN=LmxM.26.0240	LmxM.26.0240	0.604807	8.70568e-05	Down	20.365	56	10	10	10	204750	204570	221730	331400	303760	319110	387470	378260	366780	313690	296600	314820	296730	289010	277770	334170	320430	325120	0.67178	0.67119	0.727491	1.08732	0.99663	1.04699	1.27128	1.24106	1.2034	1.02921	0.973138	1.03292	0.973564	0.948235	0.911357	1.0964	1.05132	1.06671	cytoplasm,nucleus
LmxM.21.1558	Present in the outer mitochondrial membrane proteome 19 OS=Leishmania_mexicana_MHOM/GT/2001/U1103 GN=LmxM.21.1558	LmxM.21.1558	0.582607	9.32871e-05	Down	39.552	44	12	12	12	130020	124650	117100	249920	235930	233490	185340	183550	188000	173050	167990	168920	178800	173550	175160	98213	112890	105980	0.779457	0.747264	0.702003	1.49824	1.41438	1.39975	1.11109	1.10036	1.12704	1.03742	1.00708	1.01266	1.07189	1.04041	1.05007	0.588777	0.676764	0.635339	plasma membrane
LmxM.29.0860	surface protein amastin, putative OS=Leishmania_mexicana_MHOM/GT/2001/U1103 GN=LmxM.29.0860	LmxM.29.0860	0.572805	9.4504e-05	Down	21.152	20.2	4	4	4	2105800	2091500	2092300	4180300	3938100	4030300	3165900	3343200	3302900	2739300	2760300	2791600	2134700	2070800	2113500	2696600	2662300	2610200	0.745715	0.740651	0.740934	1.48035	1.39458	1.42723	1.12112	1.18391	1.16964	0.970053	0.977489	0.988574	0.755949	0.733321	0.748442	0.954932	0.942785	0.924335	plasma membrane
LmxM.32.3100	hypothetical protein, conserved OS=Leishmania_mexicana_MHOM/GT/2001/U1103 GN=LmxM.32.3100	LmxM.32.3100	0.55668	9.92052e-05	Down	52.121	21.1	6	6	6	222180	188560	204060	381320	352020	400730	296720	389460	388560	313100	298630	243200	303410	338110	245690	157000	0	0	0.752714	0.638814	0.691326	1.29186	1.19259	1.35762	1.00524	1.31943	1.31639	1.06074	1.01172	0.823927	1.02791	1.14547	0.832363	0.531893			mitochondria
LmxM.21.1750	hypothetical protein, conserved OS=Leishmania_mexicana_MHOM/GT/2001/U1103 GN=LmxM.21.1750	LmxM.21.1750	0.657103	0.000105645	Down	44.114	38.4	11	11	11	443770	452800	501870	791680	704310	761430	639540	679430	679990	532810	553340	551570	479680	472350	506820	303960	252180	235230	0.83706	0.854093	0.946651	1.4933	1.3285	1.43624	1.20633	1.28157	1.28263	1.00501	1.04374	1.0404	0.904795	0.890969	0.955988	0.573344	0.475674	0.443702	cytoskeleton
LmxM.31.1160	long chain polyunsaturated fatty acid elongation enzyme-like protein OS=Leishmania_mexicana_MHOM/GT/2001/U1103 GN=LmxM.31.1160	LmxM.31.1160	0.387914	0.000116189	Down	43.054	25.5	9	9	9	182750	190360	183200	443750	635540	573950	406770	391660	416540	410680	407820	408570	351400	273440	280840	200540	219250	222870	0.530571	0.552664	0.531877	1.28832	1.84514	1.66633	1.18096	1.13709	1.20932	1.19231	1.18401	1.18618	1.02021	0.793867	0.815351	0.582219	0.636539	0.647049	plasma membrane	K10244	ELOVL5; elongation of very long chain fatty acids protein 5 [EC:2.3.1.199]
LmxM.32.2860	hypothetical protein, conserved OS=Leishmania_mexicana_MHOM/GT/2001/U1103 GN=LmxM.32.2860	LmxM.32.2860	0.615568	0.000120493	Down	53.172	30.7	11	11	11	81175	65961	67848	120920	132690	116420	107360	112760	108340	80468	81173	83410	77004	75836	83080	98971	91191	88864	0.873125	0.709482	0.729779	1.30063	1.42723	1.25222	1.15477	1.21286	1.16531	0.865521	0.873104	0.897165	0.828262	0.815699	0.893616	1.06454	0.980858	0.955829	plasma membrane
LmxM.29.0990	hypothetical protein, conserved OS=Leishmania_mexicana_MHOM/GT/2001/U1103 GN=LmxM.29.0990	LmxM.29.0990	0.632799	0.000123882	Down	60.201	10.2	4	4	4	35475	34445	29474	51453	52289	59368	47118	54110	49803	42386	42528	40757	45134	40401	39695	0	0	18049	0.831667	0.80752	0.690981	1.20625	1.22585	1.39181	1.10462	1.26854	1.16757	0.993686	0.997015	0.955496	1.05811	0.94715	0.930599			0.423136	nucleus
LmxM.30.2840	hypothetical protein, conserved OS=Leishmania_mexicana_MHOM/GT/2001/U1103 GN=LmxM.30.2840	LmxM.30.2840	0.555841	0.000155068	Down	42.336	21.4	5	5	5	294960	296110	247980	449040	421840	531620	511150	576160	529220	334960	324110	322860	362190	374460	379280	532170	578200	579310	0.694421	0.697129	0.583817	1.05717	0.993133	1.25159	1.20339	1.35645	1.24594	0.788593	0.763049	0.760106	0.8527	0.881587	0.892935	1.25288	1.36125	1.36386	plasma membrane
LmxM.05.1030	hypothetical protein, conserved OS=Leishmania_mexicana_MHOM/GT/2001/U1103 GN=LmxM.05.1030	LmxM.05.1030	0.546531	0.000163576	Down	16.239	35.2	5	5	5	366260	331940	351840	583820	509270	543530	732760	718120	755060	398090	334370	277900	386490	370300	366950	721230	682290	716890	0.720739	0.653203	0.692363	1.14886	1.00216	1.06958	1.44195	1.41314	1.48583	0.783375	0.657985	0.546861	0.760548	0.728689	0.722097	1.41926	1.34263	1.41072	mitochondria
LmxM.26.1310	hypothetical protein, conserved OS=Leishmania_mexicana_MHOM/GT/2001/U1103 GN=LmxM.26.1310	LmxM.26.1310	0.555492	0.00017166	Down	38.902	27.5	8	8	8	346090	295670	352410	678500	641440	663100	543710	526670	526000	444410	460960	437890	463820	461420	458870	468810	473830	446920	0.716829	0.612398	0.729919	1.40532	1.32856	1.37343	1.12614	1.09085	1.08946	0.920472	0.954751	0.906968	0.960674	0.955703	0.950422	0.97101	0.981407	0.925671	nucleus
LmxM.06.1260	pteridine transporter, putative OS=Leishmania_mexicana_MHOM/GT/2001/U1103 GN=LmxM.06.1260	LmxM.06.1260	0.356158	0.000204097	Down	71.039	15.7	8	8	8	217460	222590	220330	774320	749680	756940	485630	476750	465030	402710	390660	393550	272280	270840	279520	94114	99376	75985	0.588811	0.602702	0.596582	2.09661	2.02989	2.04955	1.31493	1.29088	1.25915	1.09041	1.05778	1.06561	0.737246	0.733347	0.75685	0.25483	0.269078	0.205743	plasma membrane
LmxM.31.2440	mitochondrial RNA binding complex 1 subunit, putative OS=Leishmania_mexicana_MHOM/GT/2001/U1103 GN=LmxM.31.2440	LmxM.31.2440	0.587897	0.000214222	Down	45.834	43.3	9	9	9	165740	198020	164180	287830	262630	272740	318820	352940	301070	306150	369770	264030	264820	262690	259530	353320	325550	319240	0.590865	0.705944	0.585304	1.02612	0.936279	0.972322	1.1366	1.25824	1.07332	1.09143	1.31823	0.94127	0.944087	0.936493	0.925228	1.25959	1.16059	1.13809	nucleus
LmxM.18.1300	mitochondrial carrier protein, putative OS=Leishmania_mexicana_MHOM/GT/2001/U1103 GN=LmxM.18.1300	LmxM.18.1300	0.643521	0.00021709	Down	33.279	48.7	15	4	15	969340	970630	954360	1349200	1347600	1336900	1652900	1608300	1700400	1033800	1106400	1106500	1195200	1160600	1197900	1400200	1456100	1392100	0.76065	0.761662	0.748895	1.05873	1.05747	1.04908	1.29705	1.26205	1.33432	0.811233	0.868202	0.868281	0.937885	0.910734	0.940003	1.09875	1.14262	1.09239	extracellular	K15104	SLC25A11, OGC; solute carrier family 25 (mitochondrial oxoglutarate transporter), member 11
LmxM.18.1170	hypothetical protein, conserved OS=Leishmania_mexicana_MHOM/GT/2001/U1103 GN=LmxM.18.1170	LmxM.18.1170	0.641777	0.000234613	Down	23.508	33.7	6	5	6	130130	134500	129620	236450	225240	220320	185250	179250	182110	143130	138040	146900	133250	133530	128520	203820	201660	196020	0.76855	0.794359	0.765538	1.39648	1.33027	1.30121	1.09409	1.05865	1.07554	0.845328	0.815266	0.867594	0.786977	0.78863	0.759041	1.20376	1.19101	1.1577	extracellular
LmxM.36.4590	PHD-like zinc-binding domain containing protein, putative OS=Leishmania_mexicana_MHOM/GT/2001/U1103 GN=LmxM.36.4590	LmxM.36.4590	0.330103	0.00024407	Down	88.053	20.6	11	10	11	93946	102530	0	393830	333530	407580	229600	209120	211930	233800	209320	249850	230360	193610	205270	198360	226630	175250	0.409035	0.446409		1.71471	1.45217	1.77458	0.999663	0.910494	0.922729	1.01795	0.911365	1.08783	1.00297	0.842965	0.893732	0.863646	0.986732	0.763027	nucleus
LmxM.15.0720	flavoprotein monooxygenase, putative OS=Leishmania_mexicana_MHOM/GT/2001/U1103 GN=LmxM.15.0720	LmxM.15.0720	0.66509	0.000244308	Down	72.772	37.4	15	15	15	67317	67738	58755	90473	95392	94236	88377	103480	110850	79952	74551	81532	81267	87503	88505	56904	58277	67910	0.833923	0.839138	0.727857	1.12078	1.18172	1.1674	1.09481	1.28191	1.37321	0.990445	0.923538	1.01002	1.00674	1.08399	1.0964	0.704927	0.721936	0.841269	nucleus
LmxM.08.0370	hypothetical protein, conserved OS=Leishmania_mexicana_MHOM/GT/2001/U1103 GN=LmxM.08.0370	LmxM.08.0370	0.60875	0.000251607	Down	26.181	22.4	3	3	3	0	31178	30350	51270	55761	55147	46464	49136	45440	0	30852	0	45775	43678	0	47296	47745	49078		0.693758	0.675334	1.14084	1.24077	1.22711	1.0339	1.09335	1.01111		0.686504		1.01856	0.971903		1.05241	1.0624	1.09206	mitochondria
LmxM.34.1580	metacaspase, putative OS=Leishmania_mexicana_MHOM/GT/2001/U1103 GN=LmxM.34.1580	LmxM.34.1580	0.527207	0.000259381	Down	48.184	19.1	5	5	5	28387	35940	24617	65805	55816	50681	61150	51512	52452	33585	30869	32291	42556	36638	43711	44458	43391	36196	0.663545	0.840096	0.575421	1.53819	1.3047	1.18467	1.42938	1.20409	1.22606	0.785048	0.721561	0.754801	0.994745	0.856412	1.02174	1.0392	1.01426	0.84608	cytoplasm
LmxM.31.0230	dynein light chain, flagellar outer arm, putative OS=Leishmania_mexicana_MHOM/GT/2001/U1103 GN=LmxM.31.0230	LmxM.31.0230	0.633906	0.000277436	Down	10.587	59.3	6	6	6	1429200	1301200	1312400	1880000	1782600	1904200	2455400	2332400	2400600	1652900	1320100	1452800	1838000	1830100	1886700	2046200	2047400	1969600	0.783319	0.713164	0.719303	1.03039	0.977011	1.04366	1.34576	1.27835	1.31573	0.905925	0.723523	0.796254	1.00737	1.00304	1.03407	1.12149	1.12214	1.0795	cytoplasm	K10418	DYNLL; dynein light chain LC8-type
LmxM.30.0760	hypothetical protein, unknown function OS=Leishmania_mexicana_MHOM/GT/2001/U1103 GN=LmxM.30.0760	LmxM.30.0760	0.448091	0.0003622	Down	33.665	58.7	13	13	13	330870	328290	332730	884840	845470	921840	600420	620190	554420	519380	495430	540970	379750	386450	372130	169740	157720	165740	0.692005	0.686609	0.695895	1.85062	1.76828	1.928	1.25576	1.29711	1.15955	1.08627	1.03618	1.13142	0.794236	0.808249	0.778299	0.355006	0.329867	0.346641	nucleus
LmxM.32.0860	hypothetical protein, conserved OS=Leishmania_mexicana_MHOM/GT/2001/U1103 GN=LmxM.32.0860	LmxM.32.0860	0.532793	0.000362516	Down	46.216	14.7	5	5	5	29095	25568	22516	51671	36430	46311	51140	53247	50916	30529	35542	26754	33041	36576	29611	24278	34133	20842	0.820605	0.721128	0.635049	1.45735	1.02748	1.30617	1.44237	1.5018	1.43605	0.86105	1.00244	0.754579	0.931899	1.0316	0.835158	0.684745	0.962698	0.587835	mitochondria
LmxM.17.1280	hypothetical protein, conserved OS=Leishmania_mexicana_MHOM/GT/2001/U1103 GN=LmxM.17.1280	LmxM.17.1280	0.657649	0.000363261	Down	7.8039	77.6	5	5	5	508700	453370	485050	657270	641370	636190	849860	815830	800370	645480	634800	623380	691220	720820	658170	1333800	1295300	1285600	0.666585	0.594082	0.635595	0.861267	0.840432	0.833644	1.11363	1.06904	1.04878	0.845818	0.831823	0.816858	0.905754	0.944541	0.862446	1.74777	1.69732	1.68461	extracellular
LmxM.13.0660	hypothetical protein, conserved OS=Leishmania_mexicana_MHOM/GT/2001/U1103 GN=LmxM.13.0660	LmxM.13.0660	0.594256	0.000368913	Down	75.984	14.1	9	9	9	155060	133050	143890	266010	275580	265340	207280	227720	211990	152060	152410	145420	204020	191850	191910	154150	182480	190160	0.80892	0.694097	0.750648	1.38773	1.43765	1.38423	1.08134	1.18797	1.10591	0.793269	0.795095	0.758629	1.06433	1.00085	1.00116	0.804172	0.951965	0.99203	plasma membrane
LmxM.32.1620	hypothetical protein, conserved OS=Leishmania_mexicana_MHOM/GT/2001/U1103 GN=LmxM.32.1620	LmxM.32.1620	0.548552	0.000370761	Down	101.02	46.1	30	30	30	164700	177610	171590	370810	363200	359620	253140	262130	264760	262550	264140	243820	245330	234120	230710	136190	131870	128360	0.695157	0.749647	0.724238	1.56509	1.53297	1.51786	1.06844	1.10638	1.11748	1.10816	1.11487	1.0291	1.03548	0.988161	0.973768	0.574823	0.55659	0.541775	cytoplasm	K19759	DNAAF5; dynein axonemal assembly factor 5
LmxM.23.0370	cytochrome c oxidase subunit 10, putative OS=Leishmania_mexicana_MHOM/GT/2001/U1103 GN=LmxM.23.0370	LmxM.23.0370	0.598059	0.000418012	Down	14.047	36.4	9	9	9	831830	925440	966710	1264000	1286700	1334100	1702800	1787100	1734700	1099000	1181400	1174000	1048500	1068700	1027400	1652300	1741900	1695300	0.636554	0.708188	0.73977	0.96727	0.984641	1.02091	1.30306	1.36757	1.32747	0.841004	0.90406	0.898398	0.802359	0.817817	0.786213	1.26441	1.33298	1.29732	mitochondria
LmxM.24.1850	hypothetical predicted multi-pass transmembrane protein OS=Leishmania_mexicana_MHOM/GT/2001/U1103 GN=LmxM.24.1850	LmxM.24.1850	0.488404	0.000420977	Down	43.782	30.9	9	9	9	104510	86727	91456	198650	179000	201160	0	0	0	87120	69458	77580	76745	77572	71866	84157	78650	92495	0.993979	0.824848	0.869824	1.88933	1.70244	1.9132				0.828585	0.660605	0.737852	0.72991	0.737776	0.683507	0.800405	0.748028	0.879706	extracellular
LmxM.13.0610	actyltransferase-like protein OS=Leishmania_mexicana_MHOM/GT/2001/U1103 GN=LmxM.13.0610	LmxM.13.0610	0.618703	0.000435985	Down	29.846	27.6	6	6	6	328450	308080	301430	527300	558110	634430	443320	447110	421750	289080	274610	270390	336490	325780	352500	118100	100820	98507	0.96347	0.903717	0.88421	1.54677	1.63715	1.86103	1.30043	1.31155	1.23715	0.847983	0.805537	0.793158	0.987054	0.955638	1.03402	0.346433	0.295744	0.288959	cytoplasm
LmxM.31.3400	hypothetical protein, conserved OS=Leishmania_mexicana_MHOM/GT/2001/U1103 GN=LmxM.31.3400	LmxM.31.3400	0.592004	0.000443021	Down	66.752	38	16	16	16	70114	77635	67836	103980	107520	97023	131820	141770	146210	94534	89499	102130	118640	128480	121560	107150	109170	105950	0.656969	0.727441	0.635624	0.974294	1.00746	0.909107	1.23516	1.32839	1.36999	0.885785	0.838607	0.95696	1.11166	1.20386	1.13902	1.004	1.02292	0.992753	Golgi apparatus
LmxM.32.0830	2,4-dienoyl-coa reductase fadh1, putative OS=Leishmania_mexicana_MHOM/GT/2001/U1103 GN=LmxM.32.0830	LmxM.32.0830	0.622562	0.000451566	Down	78.76	62.9	32	32	32	324840	319400	318910	597030	580680	567740	448040	450960	449700	256840	265050	259980	298660	299820	297410	307560	308400	312350	0.877502	0.862807	0.861483	1.61278	1.56861	1.53366	1.21031	1.21819	1.21479	0.693811	0.715989	0.702293	0.806781	0.809915	0.803404	0.830823	0.833092	0.843762	cytoplasm
LmxM.08_29.0900	IPP transferase, putative OS=Leishmania_mexicana_MHOM/GT/2001/U1103 GN=LmxM.08_29.0900	LmxM.08_29.0900	0.61815	0.000508925	Down	24.565	15.8	2	2	2	19499	21450	23831	34258	32027	29085	37009	37161	40053	24959	25240	28172	30964	36078	30949	19291	23200	20439	0.68329	0.751657	0.835093	1.20048	1.1223	1.01921	1.29688	1.30221	1.40355	0.874621	0.884468	0.987212	1.08505	1.26426	1.08452	0.676001	0.812981	0.716229	nucleus	K00791	miaA, TRIT1; tRNA dimethylallyltransferase [EC:2.5.1.75]
LmxM.08_29.2230	hypothetical protein, conserved OS=Leishmania_mexicana_MHOM/GT/2001/U1103 GN=LmxM.08_29.2230	LmxM.08_29.2230	0.600951	0.000559249	Down	55.931	34.5	10	10	10	45532	44327	38414	74186	84032	75398	57471	66358	69455	45084	59848	51191	62468	64643	61237	62652	59427	63804	0.755003	0.735022	0.636974	1.23014	1.3934	1.25024	0.952973	1.10034	1.15169	0.747574	0.992388	0.848839	1.03583	1.0719	1.01542	1.03888	0.985407	1.05799	cytoplasm
LmxM.34.1230	short chain dehydrogenase, putative OS=Leishmania_mexicana_MHOM/GT/2001/U1103 GN=LmxM.34.1230	LmxM.34.1230	0.659022	0.00059201	Down	28.076	76	14	14	14	2004800	1982000	1984800	3388700	3432300	3315900	2640200	2700500	2645000	2287600	2304900	2265500	2076100	2044200	2012500	1695200	1723800	1692100	0.855207	0.845481	0.846675	1.44555	1.46415	1.4145	1.12626	1.15198	1.1283	0.975844	0.983224	0.966416	0.885622	0.872014	0.858492	0.723138	0.735338	0.721816	mitochondria	K00079	CBR1; carbonyl reductase 1 [EC:1.1.1.184 1.1.1.189 1.1.1.197]
LmxM.32.0040	hypothetical protein, conserved OS=Leishmania_mexicana_MHOM/GT/2001/U1103 GN=LmxM.32.0040	LmxM.32.0040	0.595649	0.000610471	Down	56.132	17.9	4	4	4	46444	42075	45616	82956	77641	89381	73889	63155	63361	60897	75079	61235	69510	69050	68358	38581	17362	29416	0.778387	0.705164	0.76451	1.39032	1.30124	1.498	1.23836	1.05846	1.06191	1.02061	1.2583	1.02628	1.16497	1.15726	1.14566	0.646605	0.290982	0.493003	mitochondria
LmxM.29.3450	hypothetical protein, conserved OS=Leishmania_mexicana_MHOM/GT/2001/U1103 GN=LmxM.29.3450	LmxM.29.3450	0.65405	0.000635801	Down	44.076	47.6	15	15	15	374510	308470	338270	561700	570120	573370	452260	478190	487210	488000	493490	474050	490710	445610	467480	320070	333010	299120	0.847346	0.697928	0.765351	1.27087	1.28992	1.29728	1.02326	1.08193	1.10233	1.10412	1.11654	1.07256	1.11025	1.00821	1.05769	0.724173	0.75345	0.676773	cytoplasm
LmxM.31.3430	Uncharacterised protein family UPF0564, putative OS=Leishmania_mexicana_MHOM/GT/2001/U1103 GN=LmxM.31.3430	LmxM.31.3430	0.665684	0.000644871	Down	87.468	22	13	13	13	128330	126850	131060	227010	199190	163700	204970	188390	177170	135200	142720	146470	180670	180470	160470	44642	56414	55772	0.871841	0.861786	0.890388	1.54225	1.35325	1.11214	1.39251	1.27987	1.20365	0.918514	0.969603	0.995079	1.22742	1.22607	1.09019	0.303286	0.383262	0.3789	nucleus
LmxM.34.4790	hypothetical protein, conserved OS=Leishmania_mexicana_MHOM/GT/2001/U1103 GN=LmxM.34.4790	LmxM.34.4790	0.657139	0.000657939	Down	24.755	9.1	2	2	2	0	57232	53778	0	0	0	85851	82413	85130	0	0	60628	61164	44642	46282	107300	98576	0		0.80403	0.755506				1.20609	1.15779	1.19596			0.851739	0.859269	0.627158	0.650197	1.50742	1.38486		plasma membrane	K19995	SCAMP; secretory carrier-associated membrane protein
LmxM.09.1420	hypothetical protein, conserved OS=Leishmania_mexicana_MHOM/GT/2001/U1103 GN=LmxM.09.1420	LmxM.09.1420	0.561113	0.000660195	Down	16.297	41	7	7	7	375500	404030	377810	624470	507490	585770	825730	787730	793970	373190	388280	367290	569100	584990	576460	963640	967040	989260	0.611024	0.657449	0.614783	1.01616	0.825802	0.953182	1.34365	1.28182	1.29197	0.607266	0.63182	0.597665	0.926056	0.951913	0.938032	1.56806	1.5736	1.60975	nucleus
LmxM.33.3610	Complex 1 protein (LYR family), putative OS=Leishmania_mexicana_MHOM/GT/2001/U1103 GN=LmxM.33.3610	LmxM.33.3610	0.630194	0.000662022	Down	19.768	35.8	4	4	4	48751	38972	48068	67143	78954	79216	73962	59802	71873	46667	45984	40113	62250	59087	51727	62726	62203	60799	0.829179	0.662854	0.817563	1.142	1.34289	1.34734	1.25798	1.01714	1.22245	0.793734	0.782117	0.68226	1.05878	1.00498	0.879797	1.06687	1.05798	1.0341	cytoplasm
LmxM.23.0680	mitochondrial DNA primase, putative OS=Leishmania_mexicana_MHOM/GT/2001/U1103 GN=LmxM.23.0680	LmxM.23.0680	0.604807	0.000663014	Down	60.001	34.4	15	15	15	195100	178550	174160	344320	342180	362930	247020	242650	272420	285150	280970	282970	217330	231510	216550	161030	156350	145390	0.809809	0.741114	0.722892	1.42918	1.4203	1.50643	1.02531	1.00718	1.13074	1.18358	1.16623	1.17453	0.90208	0.960937	0.898842	0.668393	0.648968	0.603476	nucleus
LmxM.23.0520	SET domain containing protein, putative OS=Leishmania_mexicana_MHOM/GT/2001/U1103 GN=LmxM.23.0520	LmxM.23.0520	0.605674	0.000683839	Down	39.179	34.7	7	7	7	295410	210730	224990	424830	403150	464660	393400	369790	358440	272130	308720	275810	362370	336210	304000	423320	405200	409810	0.851739	0.607586	0.648701	1.22489	1.16238	1.33973	1.13427	1.06619	1.03347	0.784617	0.890115	0.795227	1.0448	0.969375	0.876506	1.22053	1.16829	1.18158	cytoplasm,nucleus
LmxM.21.0970	hypothetical protein, conserved OS=Leishmania_mexicana_MHOM/GT/2001/U1103 GN=LmxM.21.0970	LmxM.21.0970	0.594109	0.000762436	Down	76.693	25.6	11	11	11	55340	56605	60735	88707	95761	74779	105800	112950	103310	74215	73940	77842	88699	82064	78779	77784	71380	90202	0.678144	0.693645	0.744255	1.08703	1.17347	0.916352	1.29649	1.3841	1.26597	0.909441	0.906071	0.953886	1.08693	1.00562	0.965368	0.953176	0.8747	1.10535	mitochondria
LmxM.27.0340	MP44, putative OS=Leishmania_mexicana_MHOM/GT/2001/U1103 GN=LmxM.27.0340	LmxM.27.0340	0.59471	0.000775998	Down	42.514	34.9	10	10	10	97305	144060	100840	187570	200870	195680	190470	166630	209610	111210	137920	131440	111970	125600	134360	184770	166910	168820	0.633213	0.937472	0.656217	1.22061	1.30716	1.27339	1.23949	1.08435	1.36404	0.7237	0.897516	0.855347	0.728646	0.817343	0.874349	1.20239	1.08617	1.0986	mitochondria
LmxM.21.0735	Domain of unknown function (DUF543), putative OS=Leishmania_mexicana_MHOM/GT/2001/U1103 GN=LmxM.21.0735	LmxM.21.0735	0.581892	0.000807532	Down	9.9423	64.9	4	4	4	72853	106920	85695	148650	157100	162660	123300	168060	152660	110290	145120	120750	107530	114040	106030	137380	144820	210200	0.552368	0.810663	0.649736	1.12706	1.19113	1.23328	0.934855	1.27422	1.15746	0.836214	1.10029	0.915521	0.815288	0.864646	0.803915	1.04161	1.09802	1.59373	plasma membrane
LmxM.36.6930	RNA editing comple protein MP63 OS=Leishmania_mexicana_MHOM/GT/2001/U1103 GN=LmxM.36.6930	LmxM.36.6930	0.654813	0.000818453	Down	65.363	10	4	4	4	62321	50343	57851	87548	92444	91031	71431	95792	82559	66144	64003	69984	81450	78904	79341	81920	73822	85842	0.817188	0.660125	0.758575	1.14798	1.21218	1.19365	0.936643	1.25608	1.08256	0.867317	0.839243	0.917669	1.06802	1.03463	1.04036	1.07418	0.967995	1.12561	nucleus
LmxM.34.0950	cell cycle sequence binding phosphoprotein (RBP33), putative OS=Leishmania_mexicana_MHOM/GT/2001/U1103 GN=LmxM.34.0950	LmxM.34.0950	0.638475	0.000829995	Down	45.574	69.1	20	20	20	632950	643530	657430	1130500	1180800	1143200	871750	870790	860860	805950	786820	789360	691470	692740	676980	501930	511270	531830	0.814948	0.82857	0.846467	1.45556	1.52033	1.47191	1.12241	1.12118	1.10839	1.03769	1.01306	1.01633	0.890295	0.89193	0.871638	0.646254	0.65828	0.684752	nucleus
LmxM.28.2010	hypothetical protein, conserved OS=Leishmania_mexicana_MHOM/GT/2001/U1103 GN=LmxM.28.2010	LmxM.28.2010	0.631068	0.000852094	Down	59.638	27.1	10	10	10	99939	128420	113440	203340	194210	192140	148950	172850	171750	156130	146460	155830	120800	124990	116620	90790	70302	55550	0.730515	0.9387	0.829202	1.48634	1.4196	1.40447	1.08877	1.26347	1.25543	1.14125	1.07057	1.13906	0.883001	0.913628	0.852447	0.66364	0.51388	0.406049	mitochondria
LmxM.09.0050	endonuclease III, putative OS=Leishmania_mexicana_MHOM/GT/2001/U1103 GN=LmxM.09.0050	LmxM.09.0050	0.626298	0.000860158	Down	29.292	24.4	5	5	5	54504	68662	66904	93455	88524	90044	109130	113370	112440	70981	66952	65512	67156	71656	61629	75424	73266	70387	0.690898	0.870366	0.848081	1.18464	1.12214	1.14141	1.38334	1.43709	1.4253	0.899762	0.84869	0.830436	0.851276	0.908318	0.781215	0.956082	0.928727	0.892232	cytoplasm,nucleus	K10773	NTH; endonuclease III [EC:4.2.99.18]
LmxM.29.0230	mitochondrial carrier protein, putative OS=Leishmania_mexicana_MHOM/GT/2001/U1103 GN=LmxM.29.0230	LmxM.29.0230	0.574394	0.000864401	Down	40.433	22	6	6	6	124240	97590	112700	237320	203100	187750	155400	174220	207020	107750	112290	124630	171090	147050	150530	105300	107910	117470	0.846014	0.664541	0.767432	1.61603	1.38301	1.27849	1.0582	1.18635	1.40971	0.733725	0.76464	0.84867	1.16504	1.00134	1.02504	0.717042	0.734815	0.799914	plasma membrane
LmxM.36.6970	hypothetical protein, conserved OS=Leishmania_mexicana_MHOM/GT/2001/U1103 GN=LmxM.36.6970	LmxM.36.6970	0.607603	0.000893094	Down	34.306	37.2	9	9	9	37077	38740	40617	72707	60655	77489	56691	52896	62819	59312	46907	55785	58533	59559	55142	47286	48855	42076	0.685803	0.716563	0.751281	1.34484	1.12192	1.43329	1.0486	0.978402	1.16194	1.09708	0.867625	1.03184	1.08267	1.10165	1.01995	0.874635	0.903657	0.778268	cytoplasm
LmxM.14.0380	Plasma-membrane choline transporter, putative OS=Leishmania_mexicana_MHOM/GT/2001/U1103 GN=LmxM.14.0380	LmxM.14.0380	0.630437	0.000901677	Down	64.31	25.2	8	8	8	41034	38668	37813	57682	50611	50396	70528	71048	72540	53041	50954	52642	67064	70295	66932	129220	127210	127120	0.598164	0.563674	0.551211	0.840847	0.737771	0.734637	1.02811	1.03569	1.05744	0.773194	0.742771	0.767377	0.977611	1.02471	0.975687	1.88368	1.85438	1.85306	plasma membrane	K15377	SLC44A2_4_5; solute carrier family 44 (choline transporter-like protein), member 2/4/5
LmxM.34.1060	hypothetical protein, conserved OS=Leishmania_mexicana_MHOM/GT/2001/U1103 GN=LmxM.34.1060	LmxM.34.1060	0.599405	0.000917543	Down	64.706	10.1	4	4	4	70826	55287	65029	130980	99767	113120	104360	101460	88085	92010	93437	82908	119010	110810	95538	123710	105730	104610	0.725727	0.566505	0.666327	1.3421	1.02227	1.1591	1.06934	1.03962	0.902573	0.942791	0.957413	0.849527	1.21945	1.13543	0.978941	1.26761	1.08338	1.0719	nucleus
LmxM.31.1150	hypothetical protein, conserved OS=Leishmania_mexicana_MHOM/GT/2001/U1103 GN=LmxM.31.1150	LmxM.31.1150	0.538925	0.000938552	Down	33.513	43.1	12	12	12	149360	154620	146960	334600	331550	334530	222550	225640	224610	170950	168010	162430	190930	191860	192710	104990	107030	109620	0.763133	0.790008	0.750871	1.70959	1.69401	1.70923	1.13709	1.15287	1.14761	0.873444	0.858423	0.829912	0.975529	0.980281	0.984624	0.536431	0.546854	0.560087	cytoplasm
LmxM.18.0480	uracil-DNA-glycosylase, putative OS=Leishmania_mexicana_MHOM/GT/2001/U1103 GN=LmxM.18.0480	LmxM.18.0480	0.411736	0.000948964	Down	40.92	26.5	6	6	6	38360	30109	43484	112580	110590	107300	73200	69434	70706	66417	60730	58642	74489	67442	65524	70355	69609	79790	0.544216	0.427158	0.616911	1.59718	1.56895	1.52227	1.03849	0.985065	1.00311	0.942263	0.861581	0.831958	1.05678	0.956804	0.929594	0.998131	0.987548	1.13199	mitochondria	K03648	UNG, UDG; uracil-DNA glycosylase [EC:3.2.2.27]
LmxM.30.0170	hypothetical protein, conserved OS=Leishmania_mexicana_MHOM/GT/2001/U1103 GN=LmxM.30.0170	LmxM.30.0170	0.58353	0.00102424	Down	57.334	17.1	5	5	5	58311	48464	57075	111080	105020	97810	89060	72954	85658	82125	85398	56617	90655	78716	68457	85038	85275	78645	0.730736	0.607336	0.715246	1.39202	1.31608	1.22573	1.11607	0.914237	1.07344	1.02917	1.07018	0.709507	1.13606	0.986445	0.857882	1.06567	1.06864	0.985555	plasma membrane
LmxM.27.2020	D-lactate dehydrogenase-like protein OS=Leishmania_mexicana_MHOM/GT/2001/U1103 GN=LmxM.27.2020	LmxM.27.2020	0.664643	0.00103458	Down	53.423	72.6	30	30	30	5975400	6151400	6199800	10240000	10326000	10714000	7998500	7928100	7940600	5078700	5001100	4970800	4896600	4929200	4862200	4009000	3838400	4066800	0.934252	0.961769	0.969336	1.60102	1.61447	1.67513	1.25056	1.23956	1.24151	0.794053	0.78192	0.777183	0.765582	0.770679	0.760203	0.626806	0.600132	0.635843	cytoplasm	K00102	LDHD, dld; D-lactate dehydrogenase (cytochrome) [EC:1.1.2.4]
LmxM.36.4800	hypothetical protein, conserved OS=Leishmania_mexicana_MHOM/GT/2001/U1103 GN=LmxM.36.4800	LmxM.36.4800	0.61892	0.00105062	Down	56.77	24.1	7	7	7	40235	44759	38401	75969	79462	75670	60105	52547	54990	60963	56942	57226	50049	51330	49409	81814	69344	59569	0.684021	0.760931	0.652841	1.29152	1.3509	1.28644	1.02182	0.893332	0.934865	1.03641	0.96805	0.972878	0.850865	0.872643	0.839984	1.39089	1.17889	1.01271	nucleus
LmxM.24.1240	hypothetical protein, conserved OS=Leishmania_mexicana_MHOM/GT/2001/U1103 GN=LmxM.24.1240	LmxM.24.1240	0.641705	0.00111441	Down	68.043	22.3	9	9	9	78848	86822	72473	142020	130620	136970	104230	119940	108440	102120	104650	106380	135210	118280	112060	128670	100390	98976	0.714239	0.786471	0.656492	1.28648	1.18321	1.24073	0.94416	1.08647	0.982296	0.925047	0.947965	0.963636	1.22479	1.07143	1.01509	1.16555	0.909376	0.896567	nucleus
LmxM.21.0170	hypothetical protein, conserved OS=Leishmania_mexicana_MHOM/GT/2001/U1103 GN=LmxM.21.0170	LmxM.21.0170	0.62852	0.00113509	Down	82.689	24.2	12	12	12	121900	134470	120450	224420	239520	205730	185120	174050	170230	142580	143110	121480	172430	158400	162650	99075	103640	98027	0.790053	0.871521	0.780655	1.4545	1.55237	1.33337	1.19979	1.12805	1.10329	0.924083	0.927518	0.787331	1.11755	1.02662	1.05416	0.642121	0.671707	0.635328	plasma membrane
LmxM.21.1210	thymidine kinase, putative OS=Leishmania_mexicana_MHOM/GT/2001/U1103 GN=LmxM.21.1210	LmxM.21.1210	0.655458	0.00114672	Down	31.589	58.5	11	11	11	145950	152910	143240	245910	257160	268910	192390	197610	187000	193070	192360	191290	170610	176380	169750	92509	90952	91521	0.831487	0.871138	0.816047	1.40097	1.46506	1.532	1.09606	1.1258	1.06535	1.09993	1.09589	1.08979	0.971976	1.00485	0.967077	0.52703	0.518159	0.521401	cytoplasm	K00857	tdk, TK; thymidine kinase [EC:2.7.1.21]
LmxM.03.0740	cytochrome c oxidase copper chaperone, putative OS=Leishmania_mexicana_MHOM/GT/2001/U1103 GN=LmxM.03.0740	LmxM.03.0740	0.640147	0.00118423	Down	9.2895	58.3	7	7	7	147690	142810	149860	199210	195940	189120	256590	265550	269400	248220	242590	235310	159670	169950	168110	387050	376180	365470	0.637707	0.616635	0.647076	0.860163	0.846044	0.816596	1.10792	1.14661	1.16323	1.07178	1.04747	1.01604	0.689435	0.733822	0.725877	1.67123	1.6243	1.57805	extracellular	K02260	COX17; cytochrome c oxidase assembly protein subunit 17
LmxM.19.0210	ADP/ATP translocase 1, putative OS=Leishmania_mexicana_MHOM/GT/2001/U1103 GN=LmxM.19.0210	LmxM.19.0210	0.660775	0.00122048	Down	35.159	62.1	22	22	22	8635200	8980100	8905900	14457000	15844000	15399000	11243000	11547000	11783000	9867000	9532900	10025000	10802000	10752000	10649000	7904000	7961600	7979200	0.808426	0.840716	0.833769	1.35346	1.48331	1.44165	1.05257	1.08103	1.10312	0.923747	0.892469	0.938539	1.01128	1.0066	0.996958	0.739971	0.745364	0.747012	plasma membrane	K05863	SLC25A4S, ANT; solute carrier family 25 (mitochondrial adenine nucleotide translocator), member 4/5/6/31
LmxM.17.1460	ferrochelatase-like protein OS=Leishmania_mexicana_MHOM/GT/2001/U1103 GN=LmxM.17.1460	LmxM.17.1460	0.516662	0.00123152	Down	42.448	31.4	8	8	8	122880	128640	158020	317530	324410	265980	202750	256630	218030	256680	228590	255520	319170	206570	313230	73881	246910	111430	0.552015	0.57789	0.709874	1.42644	1.45735	1.19486	0.910815	1.15286	0.979457	1.15309	1.0269	1.14787	1.43381	0.927976	1.40712	0.331896	1.1092	0.500578	mitochondria
LmxM.07.0780	hypothetical protein, conserved OS=Leishmania_mexicana_MHOM/GT/2001/U1103 GN=LmxM.07.0780	LmxM.07.0780	0.660997	0.00131095	Down	33.769	27.8	6	6	6	58758	61232	64379	111260	101990	95125	84439	86207	78830	72313	75553	86273	91516	86532	84678	91826	89357	77133	0.70632	0.736059	0.773889	1.33744	1.226	1.14348	1.01503	1.03628	0.947602	0.869262	0.90821	1.03707	1.1001	1.04019	1.0179	1.10382	1.07415	0.927203	plasma membrane
LmxM.24.1280	amastin-like surface protein-like protein OS=Leishmania_mexicana_MHOM/GT/2001/U1103 GN=LmxM.24.1280	LmxM.24.1280	0.357771	0.00143547	Down	20.154	10.7	2	2	2	406110	397320	453560	1493500	1532600	1692200	732300	797340	778850	669020	638710	677760	496320	481070	514730	228080	209450	223010	0.588474	0.575737	0.657231	2.16416	2.22081	2.45208	1.06114	1.15539	1.12859	0.969444	0.925523	0.982108	0.719193	0.697095	0.74587	0.330499	0.303504	0.323153	plasma membrane
LmxM.11.0840	Alpha/beta hydrolase family, putative OS=Leishmania_mexicana_MHOM/GT/2001/U1103 GN=LmxM.11.0840	LmxM.11.0840	0.399777	0.00152539	Down	45.994	16.6	4	4	4	32876	22719	24895	88812	83640	82390	50433	49511	47888	33405	32043	31880	41679	40786	33172	28356	26874	24684	0.762545	0.526958	0.577429	2.05996	1.94	1.911	1.16977	1.14839	1.11074	0.774815	0.743224	0.739444	0.966727	0.946015	0.769411	0.657706	0.623331	0.572535	cytoplasm	K13696	ABHD1_3; abhydrolase domain-containing protein 1/3
LmxM.15.0180	serine/threonine-protein kinase, putative OS=Leishmania_mexicana_MHOM/GT/2001/U1103 GN=LmxM.15.0180	LmxM.15.0180	0.660744	0.00154795	Down	80.804	27.2	11	11	11	126010	112810	125220	220180	206680	208370	163510	149680	153490	137260	136550	126710	143390	138030	135330	85907	93420	89470	0.888779	0.795677	0.883207	1.55298	1.45776	1.46968	1.15328	1.05573	1.0826	0.968128	0.963121	0.893717	1.01136	0.973559	0.954516	0.605923	0.658914	0.631054	nucleus	K08825	DYRK1; dual specificity tyrosine-phosphorylation-regulated kinase 1 [EC:2.7.12.1]
LmxM.13.0590	hypothetical protein, conserved OS=Leishmania_mexicana_MHOM/GT/2001/U1103 GN=LmxM.13.0590	LmxM.13.0590	0.639992	0.0015782	Down	35.315	30.8	7	7	7	63997	60654	54031	101720	112750	106920	83557	74197	79244	95955	89444	86180	76056	75703	70230	69665	78677	67312	0.796482	0.754877	0.672449	1.26597	1.40324	1.33069	1.03992	0.923428	0.986241	1.19422	1.11319	1.07256	0.946564	0.942171	0.874056	0.867024	0.979184	0.83774	nucleus
LmxM.33.1320	hypothetical protein, conserved OS=Leishmania_mexicana_MHOM/GT/2001/U1103 GN=LmxM.33.1320	LmxM.33.1320	0.65986	0.00168032	Down	82.218	6.5	3	3	3	13569	0	12971	20404	20847	19080	0	0	0	15490	0	20324	0	9625.9	11385	0	0	0	0.849857		0.812403	1.27795	1.30569	1.19502				0.970174		1.27294		0.602892	0.713068				mitochondria
LmxM.09.0090	RNA-binding protein 5-like protein OS=Leishmania_mexicana_MHOM/GT/2001/U1103 GN=LmxM.09.0090	LmxM.09.0090	0.621794	0.00168885	Down	31.744	12.4	3	3	3	0	42230	41357	69294	75972	54872	62027	69865	71256	39490	0	0	45742	0	44526	102800	95180	82530		0.659005	0.645381	1.08134	1.18555	0.856285	0.967939	1.09025	1.11196	0.616246			0.71381		0.694834	1.60421	1.4853	1.28789	nucleus	K13126	PABPC; polyadenylate-binding protein
LmxM.34.0790	actin-like protein, putative OS=Leishmania_mexicana_MHOM/GT/2001/U1103 GN=LmxM.34.0790	LmxM.34.0790	0.615899	0.00170247	Down	53.531	23.1	7	6	7	60484	55680	41864	97537	93282	78114	78008	74597	91624	80385	76739	70900	82154	85832	85081	29842	0	0	0.818649	0.753627	0.566628	1.32016	1.26257	1.05727	1.05584	1.00967	1.24013	1.08801	1.03866	0.959629	1.11195	1.16173	1.15157	0.403911			nucleus	K16575	ACTR1, ARP1; centractin
LmxM.34.0870	hypothetical protein, conserved OS=Leishmania_mexicana_MHOM/GT/2001/U1103 GN=LmxM.34.0870	LmxM.34.0870	0.534258	0.00172598	Down	103.16	21.2	14	13	13	89109	63209	84906	170890	167210	176460	120210	126530	126750	112100	106940	111040	105750	106790	109260	80667	78074	81873	0.794919	0.563872	0.757425	1.52447	1.49164	1.57416	1.07236	1.12874	1.1307	1.00002	0.953985	0.99056	0.943369	0.952647	0.974681	0.71961	0.696478	0.730368	plasma membrane
LmxM.34.4700	Kinesin-13 6, putative OS=Leishmania_mexicana_MHOM/GT/2001/U1103 GN=LmxM.34.4700	LmxM.34.4700	0.59552	0.00172633	Down	53.216	50	21	21	21	209810	224320	229860	436090	446480	447890	293870	297570	308050	302690	305960	312770	267720	274800	264050	292400	313720	294740	0.683817	0.731109	0.749165	1.42131	1.45518	1.45977	0.957788	0.969847	1.004	0.986534	0.997192	1.01939	0.872559	0.895634	0.860598	0.952997	1.02248	0.960623	cytoplasm	K10393	KIF2_24, MCAK; kinesin family member 2/24
LmxM.05.0910	hypothetical protein, conserved OS=Leishmania_mexicana_MHOM/GT/2001/U1103 GN=LmxM.05.0910	LmxM.05.0910	0.503636	0.00177908	Down	115.27	10	8	8	8	273020	252880	225600	444550	402830	506950	459690	741550	428730	425680	380570	383210	442510	394350	471560	392170	395080	341100	0.667528	0.618286	0.551587	1.08691	0.98491	1.23948	1.12393	1.81307	1.04824	1.04078	0.930485	0.93694	1.08193	0.964177	1.15295	0.958847	0.965962	0.833982	extracellular
LmxM.36.2360	tyrosine aminotransferase, putative OS=Leishmania_mexicana_MHOM/GT/2001/U1103 GN=LmxM.36.2360	LmxM.36.2360	0.662116	0.0017939	Down	49.561	68.8	25	25	25	1936700	1888000	1830000	3338100	3279600	3235600	2434000	2415600	2377800	2101600	2046500	2069300	1797400	1755800	1770800	1178300	1146300	1124100	0.924059	0.900823	0.873149	1.59271	1.5648	1.5438	1.16134	1.15256	1.13452	1.00274	0.976448	0.987327	0.857595	0.837746	0.844903	0.562203	0.546935	0.536343	plasma membrane	K00815	TAT; tyrosine aminotransferase [EC:2.6.1.5]
LmxM.32.1900	vesicular protein trafficking mediator, putative OS=Leishmania_mexicana_MHOM/GT/2001/U1103 GN=LmxM.32.1900	LmxM.32.1900	0.626433	0.00180519	Down	22.345	25.5	5	5	5	57997	60060	88786	111900	112150	120820	96573	110810	108130	62059	83212	86646	77463	76505	82287	144670	99304	126360	0.612022	0.633792	0.936928	1.18084	1.18348	1.27497	1.0191	1.16934	1.14106	0.654887	0.878107	0.914345	0.81744	0.807331	0.868346	1.52665	1.04792	1.33343	cytoplasm	K12197	CHMP1, VPS46, DID2; charged multivesicular body protein 1
LmxM.26.2030	hypothetical protein, conserved OS=Leishmania_mexicana_MHOM/GT/2001/U1103 GN=LmxM.26.2030	LmxM.26.2030	0.514793	0.00180568	Down	83.583	20.3	9	9	9	123930	110230	122980	283770	269020	310190	169260	173060	182210	131680	142840	140430	163620	158040	166790	81261	73899	79296	0.773889	0.688339	0.767957	1.77202	1.67991	1.937	1.05696	1.08068	1.13782	0.822284	0.891974	0.876924	1.02174	0.986891	1.04153	0.50744	0.461467	0.495169	plasma membrane
LmxM.36.6290	glucose transporter 2 OS=Leishmania_mexicana_MHOM/GT/2001/U1103 GN=LmxM.36.6290	LmxM.36.6290	0.591667	0.00183294	Down	61.174	17.6	9	4	9	2302800	2281500	2269100	4577500	4596700	4572000	3152500	3090700	3177000	3155500	3161200	3279600	2374600	2373700	2336900	2979400	3054800	3041400	0.743146	0.736273	0.732271	1.47722	1.48342	1.47545	1.01736	0.997413	1.02526	1.01832	1.02016	1.05837	0.766317	0.766027	0.754151	0.961495	0.985827	0.981503	plasma membrane	K08143	SLC2A5, GLUT5; MFS transporter, SP family, solute carrier family 2 (facilitated glucose/fructose transporter), member 5
LmxM.14.1240	hypothetical protein, conserved OS=Leishmania_mexicana_MHOM/GT/2001/U1103 GN=LmxM.14.1240	LmxM.14.1240	0.664697	0.00187245	Down	31.96	38.8	9	9	9	206490	159470	200880	335170	279910	306320	277630	253310	253220	215540	226330	219720	236110	206070	185710	305300	288080	287820	0.836541	0.646052	0.813814	1.35786	1.13398	1.24098	1.12475	1.02622	1.02586	0.873205	0.916918	0.890139	0.956539	0.83484	0.752356	1.23684	1.16708	1.16603	nucleus
LmxM.34.3700	glycosomal membrane protein OS=Leishmania_mexicana_MHOM/GT/2001/U1103 GN=LmxM.34.3700	LmxM.34.3700	0.504293	0.0019088	Down	24.88	76	19	19	19	6336800	6214200	6219700	9850500	9302300	9118800	15417000	15406000	15349000	6836100	6644100	7022300	6961600	6745900	6786100	17706000	18805000	18429000	0.603025	0.591358	0.591881	0.937397	0.885229	0.867767	1.46712	1.46607	1.46065	0.650539	0.632268	0.668259	0.662482	0.641956	0.645781	1.68494	1.78953	1.75375	extracellular
LmxM.34.0340	hypothetical protein, conserved OS=Leishmania_mexicana_MHOM/GT/2001/U1103 GN=LmxM.34.0340	LmxM.34.0340	0.594514	0.00199025	Down	54.007	17.5	6	6	6	0	25088	30835	49808	44613	49761	37901	47527	52585	39654	36946	35301	20123	25785	29866	22976	0	24139		0.70065	0.86115	1.39102	1.24594	1.38971	1.05849	1.32732	1.46858	1.10744	1.03182	0.985876	0.561989	0.720116	0.834089	0.641667		0.674147	extracellular	K25166	EEF1AKNMT, METTL13; eEF1A lysine and N-terminal methyltransferase [EC:2.1.1.-]
LmxM.34.4510	hypothetical protein, conserved OS=Leishmania_mexicana_MHOM/GT/2001/U1103 GN=LmxM.34.4510	LmxM.34.4510	0.555258	0.00199897	Down	25.658	25.1	4	4	4	129440	130440	76326	222050	220740	211040	187110	179460	190590	130230	142140	126530	135480	125650	127000	204220	220230	228840	0.779885	0.78591	0.45987	1.33787	1.32997	1.27153	1.12735	1.08126	1.14832	0.784645	0.856404	0.762352	0.816277	0.75705	0.765184	1.23044	1.3269	1.37878	mitochondria
LmxM.31.3200	hypothetical protein, conserved OS=Leishmania_mexicana_MHOM/GT/2001/U1103 GN=LmxM.31.3200	LmxM.31.3200	0.569528	0.00217152	Down	143.18	14.2	12	12	12	29027	27855	25353	60063	54310	61630	37673	37773	37334	34114	35664	40052	40911	41067	43747	25438	27167	28158	0.760161	0.729469	0.663946	1.57293	1.42227	1.61397	0.986583	0.989202	0.977705	0.89338	0.933971	1.04888	1.07138	1.07547	1.14565	0.666172	0.711451	0.737404	nucleus
LmxM.11.0140	hypothetical protein, conserved OS=Leishmania_mexicana_MHOM/GT/2001/U1103 GN=LmxM.11.0140	LmxM.11.0140	0.617141	0.0021831	Down	33.075	64	13	13	13	205400	195570	191390	405290	379480	350080	262950	256570	265320	277180	293260	281820	253270	237610	232580	140760	161620	144850	0.815259	0.776243	0.759652	1.60865	1.50621	1.38951	1.04368	1.01836	1.05309	1.10016	1.16399	1.11858	1.00526	0.943105	0.92314	0.558695	0.641491	0.574928	nucleus
LmxM.34.0840	nuclear transmembrane protein, putative OS=Leishmania_mexicana_MHOM/GT/2001/U1103 GN=LmxM.34.0840	LmxM.34.0840	0.499614	0.00222771	Down	45.632	22.9	7	7	7	98314	98359	88649	230810	256180	228090	124750	143920	158420	100310	120200	130130	127000	102250	115750	83388	71281	71051	0.753411	0.753756	0.679345	1.76877	1.96319	1.74793	0.955999	1.1029	1.21402	0.768707	0.921131	0.997228	0.973241	0.783574	0.887029	0.639029	0.546249	0.544486	plasma membrane
LmxM.34.1110	Rdx family, putative OS=Leishmania_mexicana_MHOM/GT/2001/U1103 GN=LmxM.34.1110	LmxM.34.1110	0.561603	0.00238908	Down	35.379	55.9	13	13	13	203940	181430	197860	436680	418140	419640	265370	259570	277620	282500	261890	314310	262940	264250	310930	276590	293680	278930	0.705096	0.627271	0.684075	1.50976	1.44566	1.45085	0.917482	0.897429	0.959835	0.976707	0.905451	1.08669	0.909081	0.91361	1.075	0.956274	1.01536	0.964364	cytoplasm
LmxM.12.0130	Cell division protein kinase, putative OS=Leishmania_mexicana_MHOM/GT/2001/U1103 GN=LmxM.12.0130	LmxM.12.0130	0.582398	0.00239812	Down	64.174	39.5	16	16	16	55112	55109	55757	116920	116720	108730	74047	77279	76285	72695	72514	66794	71668	68176	70840	55724	51505	47261	0.755456	0.755415	0.764297	1.6027	1.59996	1.49043	1.01501	1.05931	1.04569	0.996477	0.993996	0.915588	0.982399	0.934532	0.971049	0.763845	0.706012	0.647837	cytoplasm	K02087	CDK1, CDC2; cyclin-dependent kinase 1 [EC:2.7.11.22 2.7.11.23]
LmxM.21.0720	hypothetical protein, conserved OS=Leishmania_mexicana_MHOM/GT/2001/U1103 GN=LmxM.21.0720	LmxM.21.0720	0.640885	0.00244158	Down	34.886	55.8	10	10	10	976840	957560	826180	1596000	1577600	1699400	1239600	1212100	1290200	1218500	944850	994760	1138000	1067100	1175900	718720	989460	862680	0.858322	0.841382	0.725942	1.40236	1.38619	1.49322	1.0892	1.06504	1.13366	1.07066	0.830214	0.874068	0.999929	0.937631	1.03323	0.631519	0.869411	0.758013	mitochondria
LmxM.33.2190	kinatase, putative OS=Leishmania_mexicana_MHOM/GT/2001/U1103 GN=LmxM.33.2190	LmxM.33.2190	0.589436	0.00247007	Down	152.79	8.6	6	6	6	36054	36022	37759	75286	75193	73658	50334	50557	47650	40840	48234	46641	39563	46467	34705	0	0	0	0.73185	0.7312	0.766459	1.52821	1.52632	1.49516	1.02172	1.02624	0.967234	0.829	0.979088	0.946752	0.803078	0.94322	0.704467				cytoplasm,nucleus	K04459	DUSP, MKP; dual specificity MAP kinase phosphatase [EC:3.1.3.16 3.1.3.48]
LmxM.32.2400	GTPase protein, putative OS=Leishmania_mexicana_MHOM/GT/2001/U1103 GN=LmxM.32.2400	LmxM.32.2400	0.58403	0.00254529	Down	62.422	33.2	13	13	13	99714	97515	93148	206860	204130	190140	129980	133620	129660	144930	135520	146750	123970	114530	112970	58053	56619	56031	0.803375	0.785658	0.750474	1.66663	1.64463	1.53192	1.04722	1.07655	1.04464	1.16767	1.09186	1.18233	0.9988	0.922744	0.910176	0.467721	0.456167	0.45143	nucleus	K14538	NUG1, GNL3; nuclear GTP-binding protein
LmxM.36.0550	cdc2-related kinase 3, putative OS=Leishmania_mexicana_MHOM/GT/2001/U1103 GN=LmxM.36.0550	LmxM.36.0550	0.384861	0.00257533	Down	35.613	57.6	12	11	11	84930	79333	72207	295980	277370	260000	132970	138550	123990	164420	135650	142390	124610	108670	120510	56125	48337	45507	0.633925	0.592148	0.538959	2.20922	2.07031	1.94066	0.992499	1.03415	0.925472	1.22724	1.0125	1.06281	0.930099	0.811122	0.899497	0.418922	0.360791	0.339668	cytoplasm	K02088	CDK3; cyclin-dependent kinase 3 [EC:2.7.11.22]
LmxM.36.4990	tubulin delta chain OS=Leishmania_mexicana_MHOM/GT/2001/U1103 GN=LmxM.36.4990	LmxM.36.4990	0.424152	0.00258238	Down	60.522	20.7	7	7	7	18706	19622	24185	62336	61402	57305	43934	29914	39876	26457	28808	28448	28319	30587	32936	0	0	0	0.526598	0.552385	0.680839	1.75484	1.72855	1.61321	1.2368	0.842118	1.12256	0.744799	0.810983	0.800848	0.797217	0.861064	0.927191				cytoplasm	K10390	TUBD; tubulin delta
LmxM.28.1810	hypothetical protein, conserved OS=Leishmania_mexicana_MHOM/GT/2001/U1103 GN=LmxM.28.1810	LmxM.28.1810	0.657816	0.00258932	Down	15.159	26.6	2	2	2	94804	0	86192	147900	155800	130610	133180	143210	114740	160860	142180	149270	167200	160670	154850	170080	138310	145600	0.672802		0.611685	1.04961	1.10568	0.926909	0.945148	1.01633	0.814283	1.14159	1.00902	1.05933	1.18658	1.14024	1.09893	1.20702	0.981554	1.03329	cytoplasm
LmxM.13.1620	squalene monooxygenase-like protein OS=Leishmania_mexicana_MHOM/GT/2001/U1103 GN=LmxM.13.1620	LmxM.13.1620	0.552876	0.00264997	Down	63.762	56.6	26	26	26	113730	124930	125370	267530	272840	273700	167280	170690	164820	150490	158980	168500	124600	115450	117630	97372	99562	95290	0.72884	0.800616	0.803435	1.71447	1.7485	1.75401	1.07202	1.09387	1.05625	0.964417	1.01883	1.07983	0.798501	0.739863	0.753833	0.62401	0.638044	0.610667	peroxisome	K00511	SQLE, ERG1; squalene monooxygenase [EC:1.14.14.17]
LmxM.34.0690	Tetratricopeptide repeat, putative OS=Leishmania_mexicana_MHOM/GT/2001/U1103 GN=LmxM.34.0690	LmxM.34.0690	0.652749	0.00274554	Down	70.191	35	18	18	18	109960	109570	100650	136610	130440	136930	190740	193880	192420	136970	138990	128540	144360	151970	138990	165200	160440	146050	0.757558	0.754871	0.693418	0.941161	0.898653	0.943365	1.31408	1.33572	1.32566	0.943641	0.957557	0.885563	0.994554	1.04698	0.957557	1.13813	1.10534	1.0062	cytoplasm
LmxM.14.1340	delta-6 fatty acid desaturase, putative OS=Leishmania_mexicana_MHOM/GT/2001/U1103 GN=LmxM.14.1340	LmxM.14.1340	0.449664	0.00277757	Down	47.998	29.7	11	11	11	71345	75766	54885	196950	177420	181100	120990	111460	110510	72282	84610	76545	76834	67087	65800	47106	30236	45987	0.770412	0.818152	0.59267	2.12675	1.91585	1.95559	1.3065	1.20359	1.19333	0.78053	0.913653	0.826564	0.829685	0.724433	0.710535	0.50867	0.326501	0.496586	plasma membrane	K10225	FADS3; fatty acid desaturase 3 (Delta-13 desaturase) [EC:1.14.19.-]
LmxM.31.3800	hypothetical protein, conserved OS=Leishmania_mexicana_MHOM/GT/2001/U1103 GN=LmxM.31.3800	LmxM.31.3800	0.545473	0.00284671	Down	23.664	20.5	4	4	4	32758	46109	61850	74361	88366	105430	88671	79966	79151	81360	76468	87899	47626	53832	54393	97247	99920	106320	0.433012	0.609492	0.817565	0.982942	1.16807	1.39363	1.1721	1.05703	1.04626	1.07546	1.01079	1.16189	0.629545	0.711579	0.718994	1.28546	1.32079	1.40539	extracellular
LmxM.31.2640	cystathionine beta-lyase, putative OS=Leishmania_mexicana_MHOM/GT/2001/U1103 GN=LmxM.31.2640	LmxM.31.2640	0.550433	0.00286548	Down	44.512	52.1	15	15	15	512980	525180	509290	1150800	1139700	1170800	704330	719710	737320	635560	631790	667040	597750	601090	586930	236100	231170	237440	0.796348	0.815287	0.79062	1.7865	1.76927	1.81755	1.0934	1.11727	1.14461	0.986641	0.980788	1.03551	0.927945	0.93313	0.911148	0.366521	0.358867	0.368601	cytoplasm	K00315	DMGDH; dimethylglycine dehydrogenase [EC:1.5.8.4]
LmxM.04.0630	hypothetical protein, conserved OS=Leishmania_mexicana_MHOM/GT/2001/U1103 GN=LmxM.04.0630	LmxM.04.0630	0.627484	0.00317449	Down	23.173	35.9	11	11	11	456730	378500	609210	686270	673510	739320	818670	836900	849240	406640	431590	461250	686590	647800	684390	754260	643010	722300	0.715742	0.593148	0.954693	1.07545	1.05546	1.15859	1.28294	1.31151	1.33084	0.637246	0.676345	0.722825	1.07596	1.01517	1.07251	1.182	1.00766	1.13192	endoplasmic reticulum,mitochondria
LmxM.26.0440	hypothetical protein, conserved OS=Leishmania_mexicana_MHOM/GT/2001/U1103 GN=LmxM.26.0440	LmxM.26.0440	0.409758	0.00318832	Down	35.56	48.8	11	11	11	128680	104030	115670	376270	398260	377710	182830	178910	186440	223450	217050	219440	143600	161280	163040	112260	79193	124070	0.663264	0.536209	0.596206	1.93943	2.05278	1.94686	0.942373	0.922168	0.960981	1.15174	1.11876	1.13107	0.740167	0.831297	0.840368	0.578629	0.40819	0.639503	mitochondria
LmxM.28.0550	DNA repair protein RAD51, putative OS=Leishmania_mexicana_MHOM/GT/2001/U1103 GN=LmxM.28.0550	LmxM.28.0550	0.494908	0.00320014	Down	41.013	36.5	12	12	12	82880	97542	101510	257400	234200	242610	137870	131930	135320	140450	132860	127690	129210	118320	120490	142940	121660	124530	0.578364	0.680681	0.708371	1.79622	1.63433	1.69301	0.962103	0.920652	0.944308	0.980107	0.927142	0.891064	0.901671	0.825677	0.84082	0.997483	0.848984	0.869012	mitochondria	K04482	RAD51; DNA repair protein RAD51
LmxM.34.3670	NADH-ubiquinone oxidoreductase B18 subunit (NDUFB7), putative OS=Leishmania_mexicana_MHOM/GT/2001/U1103 GN=LmxM.34.3670	LmxM.34.3670	0.346763	0.00322231	Down	26.515	41.8	6	6	6	0	86138	126910	397100	362200	383970	237280	236300	226320	128340	182200	170160	163090	177420	232670	149730	209480	197940		0.399304	0.588308	1.84081	1.67902	1.77994	1.09994	1.0954	1.04914	0.594937	0.844612	0.788799	0.756025	0.822453	1.07857	0.694093	0.971071	0.917576	cytoplasm
LmxM.36.1500	hypothetical protein, conserved OS=Leishmania_mexicana_MHOM/GT/2001/U1103 GN=LmxM.36.1500	LmxM.36.1500	0.632721	0.00328177	Down	96.591	49	32	32	32	170350	173050	169980	323980	324240	312850	214130	225270	222300	239590	221300	224090	185920	194980	185730	171170	160110	180000	0.786424	0.798889	0.784716	1.49566	1.49686	1.44428	0.988536	1.03996	1.02625	1.10607	1.02164	1.03452	0.858304	0.900129	0.857426	0.79021	0.739151	0.830974	nucleus
LmxM.21.0400	Peptidase C19, ubiquitin carboxyl-terminal hydrolase, putative OS=Leishmania_mexicana_MHOM/GT/2001/U1103 GN=LmxM.21.0400	LmxM.21.0400	0.566131	0.00333974	Down	71.319	16.7	9	9	9	550550	455850	435460	1088900	1007500	1016300	652360	626820	701850	784130	726150	625310	578740	568950	533470	631770	650360	629070	0.808078	0.669081	0.639153	1.59825	1.47877	1.49169	0.957511	0.920025	1.03015	1.15092	1.06582	0.917808	0.849455	0.835085	0.783009	0.92729	0.954576	0.923327	nucleus	K11842	USP12_46; ubiquitin carboxyl-terminal hydrolase 12/46 [EC:3.4.19.12]
LmxM.14.1320	serine hydroxymethyltransferase, putative OS=Leishmania_mexicana_MHOM/GT/2001/U1103 GN=LmxM.14.1320	LmxM.14.1320	0.660495	0.00338234	Down	50.657	80	26	26	26	1425900	1474600	1476800	2598300	2603700	2565500	1835200	1834700	1817200	1776700	1766000	1745500	1826200	1826600	1839700	2579100	2657800	2681000	0.706464	0.730593	0.731683	1.28733	1.29001	1.27108	0.909253	0.909005	0.900334	0.880269	0.874967	0.864811	0.904793	0.904992	0.911482	1.27782	1.31681	1.32831	nucleus	K00600	glyA, SHMT; glycine hydroxymethyltransferase [EC:2.1.2.1]
LmxM.06.1210	hypothetical protein, unknown function OS=Leishmania_mexicana_MHOM/GT/2001/U1103 GN=LmxM.06.1210	LmxM.06.1210	0.614162	0.00347899	Down	63.637	19.7	7	7	7	62105	43738	42195	83599	90185	92682	64144	76742	74729	55595	62324	59954	70572	75221	64654	39639	59716	66334	0.944062	0.664864	0.641409	1.27079	1.37091	1.40886	0.975057	1.16656	1.13596	0.845103	0.947391	0.911364	1.07277	1.14344	0.982809	0.602555	0.907746	1.00835	nucleus
LmxM.07.0800	flavoprotein subunit-like protein OS=Leishmania_mexicana_MHOM/GT/2001/U1103 GN=LmxM.07.0800	LmxM.07.0800	0.387477	0.00348434	Down	71.045	72.2	38	38	38	386730	386030	381880	1356400	1334800	1363500	614120	651750	639210	468380	455110	433870	425480	418100	433000	299910	301420	293900	0.654022	0.652838	0.64582	2.29389	2.25736	2.30589	1.03857	1.10221	1.08101	0.792105	0.769663	0.733743	0.719554	0.707073	0.732272	0.507195	0.509749	0.497032	cytoplasm	K14402	CPSF2, CFT2; cleavage and polyadenylation specificity factor subunit 2
LmxM.24.0600	Ribosome 60S biogenesis N-terminal, putative OS=Leishmania_mexicana_MHOM/GT/2001/U1103 GN=LmxM.24.0600	LmxM.24.0600	0.576538	0.00354352	Down	192.02	31.6	38	38	38	319290	289140	325440	710190	661440	625040	407710	414100	421100	429170	397960	395050	330510	320180	315870	268420	282460	258660	0.801371	0.725699	0.816807	1.78247	1.66012	1.56876	1.02329	1.03933	1.0569	1.07715	0.998822	0.991518	0.829532	0.803605	0.792788	0.673695	0.708934	0.649199	endoplasmic reticulum
LmxM.14.0660	fatty acid elongase, putative OS=Leishmania_mexicana_MHOM/GT/2001/U1103 GN=LmxM.14.0660	LmxM.14.0660	0.591765	0.00388488	Down	32.498	33.1	9	9	9	844050	788230	783040	1097600	1040700	1031400	1660700	1675500	1657200	889300	820600	863440	788040	782030	800290	2647600	2611400	2674800	0.647721	0.604885	0.600902	0.842295	0.79863	0.791493	1.27442	1.28577	1.27173	0.682446	0.629726	0.662601	0.604739	0.600127	0.61414	2.03176	2.00398	2.05263	cytoplasm	K10203	ELOVL6; elongation of very long chain fatty acids protein 6 [EC:2.3.1.199]
LmxM.24.1730	protein kinase, putative OS=Leishmania_mexicana_MHOM/GT/2001/U1103 GN=LmxM.24.1730	LmxM.24.1730	0.532736	0.00413718	Down	153.56	2.8	3	3	3	13135	0	12111	26142	23427	21515	0	0	0	0	0	0	15507	17417	14432	0	7735.1	9619.8	0.815631		0.752045	1.62331	1.45472	1.336							0.962923	1.08153	0.89617		0.480319	0.597351	nucleus	K07359	CAMKK2; calcium/calmodulin-dependent protein kinase kinase 2 [EC:2.7.11.17]
LmxM.29.1940	succinyl-coa:3-ketoacid-coenzyme a transferase- like protein OS=Leishmania_mexicana_MHOM/GT/2001/U1103 GN=LmxM.29.1940	LmxM.29.1940	0.535876	0.00420103	Down	53.162	45.1	16	5	16	474470	472980	470170	1129500	1071700	1127000	669550	636250	656850	485660	471250	532060	497870	491700	477510	629220	624400	593620	0.74189	0.73956	0.735166	1.76611	1.67573	1.7622	1.04692	0.994852	1.02706	0.759387	0.736855	0.831939	0.778479	0.768831	0.746643	0.98386	0.976323	0.928195	mitochondria	K01027	OXCT; 3-oxoacid CoA-transferase [EC:2.8.3.5]
LmxM.14.0530	Ion channel, putative OS=Leishmania_mexicana_MHOM/GT/2001/U1103 GN=LmxM.14.0530	LmxM.14.0530	0.493984	0.00427436	Down	55.834	11.5	5	5	5	80421	0	77817	169750	161010	221760	140540	147620	120310	151850	187350	113720	124990	110520	126000	137870	148590	137720	0.579835		0.56106	1.2239	1.16088	1.59889	1.01329	1.06434	0.867434	1.09484	1.35079	0.819921	0.901177	0.796849	0.908459	0.994042	1.07133	0.992961	plasma membrane
LmxM.36.2970	hypothetical protein, conserved OS=Leishmania_mexicana_MHOM/GT/2001/U1103 GN=LmxM.36.2970	LmxM.36.2970	0.478809	0.00465993	Down	19.487	21.1	3	3	3	101420	114120	99744	136100	149450	168680	274370	300110	288240	152680	123800	108170	171910	195690	149670	383870	304400	324590	0.514675	0.579124	0.50617	0.690665	0.758413	0.855999	1.39234	1.52297	1.46273	0.774804	0.628247	0.548929	0.87239	0.993066	0.759529	1.94802	1.54474	1.64719	plasma membrane
LmxM.01.0500	fatty acyl CoA synthetase 2, putative OS=Leishmania_mexicana_MHOM/GT/2001/U1103 GN=LmxM.01.0500	LmxM.01.0500	0.434854	0.00480639	Down	78.351	40.5	19	18	19	85497	84593	91901	248570	267310	291610	147530	120350	129590	127610	125330	111970	103860	113790	106060	50139	53599	34734	0.670844	0.663751	0.721093	1.95038	2.09742	2.28809	1.15758	0.944315	1.01682	1.00128	0.98339	0.878562	0.814928	0.892843	0.83219	0.393411	0.42056	0.272537	cytoplasm	K01897	ACSL, fadD; long-chain acyl-CoA synthetase [EC:6.2.1.3]
LmxM.26.1800	methylated-DNA-[protein]-cysteine S-methyltransferase, putative OS=Leishmania_mexicana_MHOM/GT/2001/U1103 GN=LmxM.26.1800	LmxM.26.1800	0.627093	0.00511323	Down	30.184	43	7	7	7	90831	78404	92987	173820	165630	167570	107240	110260	111790	119420	84710	89556	67355	70338	70535	112400	101650	104120	0.852155	0.735568	0.872382	1.63074	1.5539	1.5721	1.0061	1.03443	1.04879	1.12037	0.794729	0.840193	0.631909	0.659894	0.661743	1.05451	0.953656	0.976829	mitochondria	K00567	ogt, MGMT; methylated-DNA-[protein]-cysteine S-methyltransferase [EC:2.1.1.63]
LmxM.08_29.0280	hypothetical protein OS=Leishmania_mexicana_MHOM/GT/2001/U1103 GN=LmxM.08_29.0280	LmxM.08_29.0280	0.398285	0.00513916	Down	53.348	71.5	33	33	33	667080	608540	642840	2294200	2223400	2139100	1010900	985510	980490	624950	586580	585800	667190	646320	650100	680430	657480	685300	0.692622	0.631841	0.667454	2.38204	2.30853	2.221	1.04961	1.02324	1.01803	0.648879	0.60904	0.60823	0.692736	0.671067	0.674992	0.706483	0.682654	0.71154	cytoplasm	K00102	LDHD, dld; D-lactate dehydrogenase (cytochrome) [EC:1.1.2.4]
LmxM.09.1150	hypothetical protein, conserved OS=Leishmania_mexicana_MHOM/GT/2001/U1103 GN=LmxM.09.1150	LmxM.09.1150	0.448235	0.00536567	Down	33.286	39.4	7	7	7	34489	41731	47629	125060	130470	116500	58256	61094	61227	80080	72808	67307	66118	57371	69418	57842	52148	37960	0.501655	0.606992	0.692781	1.81904	1.89773	1.69453	0.847355	0.888634	0.890569	1.16479	1.05902	0.979005	0.96171	0.834482	1.00971	0.841333	0.758511	0.552142	nucleus
LmxM.34.5220	hypothetical protein, conserved OS=Leishmania_mexicana_MHOM/GT/2001/U1103 GN=LmxM.34.5220	LmxM.34.5220	0.653076	0.00567635	Down	35.445	36.2	7	7	7	27023	37875	26051	38791	43584	46802	49068	43363	56917	33980	23109	14631	44906	48214	47523	38619	44466	47977	0.682304	0.956307	0.657762	0.979435	1.10045	1.1817	1.23892	1.09487	1.4371	0.857962	0.58348	0.369418	1.13383	1.21736	1.19991	0.975092	1.12272	1.21137	cytoplasm,nucleus
LmxM.12.0310	hypothetical protein, conserved OS=Leishmania_mexicana_MHOM/GT/2001/U1103 GN=LmxM.12.0310	LmxM.12.0310	0.571048	0.00569974	Down	70.517	9	4	4	4	79711	69178	64974	167450	152700	147550	103890	83957	93472	137520	125270	131950	125630	127340	128160	55287	57802	87048	0.74001	0.642226	0.603197	1.55455	1.41762	1.36981	0.96448	0.779429	0.867763	1.27669	1.16296	1.22498	1.16631	1.18218	1.18979	0.513266	0.536615	0.808125	extracellular,plasma membrane
LmxM.26.1610	Proline dehydrogenase, mitochondrial OS=Leishmania_mexicana_MHOM/GT/2001/U1103 GN=LmxM.26.1610	LmxM.26.1610	0.561425	0.00602017	Down	63.617	53.1	28	28	28	289670	281770	284820	641610	640840	639270	378260	381040	369290	365780	352340	352530	329520	326130	341010	208150	212140	200390	0.790661	0.769098	0.777423	1.75129	1.74919	1.7449	1.03247	1.04006	1.00799	0.998405	0.96172	0.962239	0.899432	0.890179	0.930794	0.56815	0.579041	0.546969	mitochondria	K00318	PRODH, fadM, putB; proline dehydrogenase [EC:1.5.5.2]
LmxM.36.0050	PUF1, putative OS=Leishmania_mexicana_MHOM/GT/2001/U1103 GN=LmxM.36.0050	LmxM.36.0050	0.566329	0.00606928	Down	61.351	46.5	20	20	20	242790	243430	215210	545530	529600	489140	285880	313800	313160	331540	318510	341860	259410	253550	240620	260400	228610	255080	0.771018	0.77305	0.683433	1.73242	1.68183	1.55334	0.907857	0.996521	0.994488	1.05286	1.01148	1.08563	0.823797	0.805188	0.764126	0.826941	0.725987	0.810046	cytoplasm
LmxM.04.0930	hypothetical protein OS=Leishmania_mexicana_MHOM/GT/2001/U1103 GN=LmxM.04.0930	LmxM.04.0930	0.527912	0.00617928	Down	17.224	21.6	2	2	2	29071	21253	31457	52089	61437	71274	38333	45066	41629	29477	33132	32075	29464	0	30814	56886	58120	28763	0.715889	0.523367	0.774646	1.28272	1.51292	1.75516	0.943971	1.10977	1.02514	0.725887	0.815894	0.789864	0.725567		0.758812	1.40085	1.43124	0.708305	extracellular
LmxM.32.1140	hypothetical protein, conserved OS=Leishmania_mexicana_MHOM/GT/2001/U1103 GN=LmxM.32.1140	LmxM.32.1140	0.467628	0.00626849	Down	45.152	37	10	10	10	144420	136080	177310	452940	462210	399820	209170	213780	220090	207910	175070	208900	151010	147950	138730	75903	61899	56509	0.714224	0.672978	0.87688	2.24	2.28584	1.97729	1.03444	1.05724	1.08845	1.02821	0.865802	1.03311	0.746814	0.731681	0.686084	0.375375	0.306119	0.279463	peroxisome
LmxM.28.2030	NADH dehydrogenase subunit NB6M, putative OS=Leishmania_mexicana_MHOM/GT/2001/U1103 GN=LmxM.28.2030	LmxM.28.2030	0.628038	0.00631058	Down	20.494	39.9	5	5	5	40628	50611	0	74722	81237	85800	66586	67568	59916	51229	51204	52764	50066	49830	51683	61442	58954	60478	0.680658	0.847907		1.25185	1.361	1.43744	1.11554	1.132	1.0038	0.858261	0.857842	0.883978	0.838777	0.834823	0.865867	1.02936	0.987681	1.01321	mitochondria
LmxM.15.1260	SET domain containing protein, putative OS=Leishmania_mexicana_MHOM/GT/2001/U1103 GN=LmxM.15.1260	LmxM.15.1260	0.665062	0.00641718	Down	45.608	20.1	4	4	4	75486	51131	43220	93955	87750	83120	82768	82767	80380	56537	53392	48926	62557	65518	78106	54603	53886	58903	1.12015	0.758742	0.641349	1.39422	1.30214	1.23343	1.22821	1.22819	1.19277	0.838963	0.792294	0.726022	0.928295	0.972233	1.15903	0.810264	0.799624	0.874072	mitochondria
LmxM.34.2580	hypothetical protein, conserved OS=Leishmania_mexicana_MHOM/GT/2001/U1103 GN=LmxM.34.2580	LmxM.34.2580	0.644789	0.00656843	Down	20.486	38.2	5	5	5	165500	180080	179720	361310	307820	309360	226570	196600	227710	283690	246290	291020	245290	218050	206850	128510	175280	170130	0.723097	0.786799	0.785226	1.57862	1.34492	1.35164	0.989922	0.858978	0.994903	1.23949	1.07608	1.27151	1.07171	0.952697	0.903762	0.561481	0.765827	0.743326	mitochondria
LmxM.13.0410	hypothetical protein, conserved OS=Leishmania_mexicana_MHOM/GT/2001/U1103 GN=LmxM.13.0410	LmxM.13.0410	0.642292	0.00666854	Down	119.31	12	10	10	10	39049	34341	33709	65755	68071	68714	42783	42896	45271	51263	49141	55813	43876	42192	38679	39845	31814	25264	0.858769	0.75523	0.741331	1.44609	1.49702	1.51116	0.940888	0.943373	0.995604	1.12738	1.08071	1.22744	0.964925	0.92789	0.850632	0.876275	0.699656	0.555608	plasma membrane
LmxM.09.1250	hypothetical protein, conserved OS=Leishmania_mexicana_MHOM/GT/2001/U1103 GN=LmxM.09.1250	LmxM.09.1250	0.658846	0.00674748	Down	19.648	37.5	4	4	4	95391	89490	77330	167430	155020	149010	111840	104780	107890	107250	98048	101180	101440	95002	83033	111910	109710	106860	0.870438	0.816592	0.705632	1.52779	1.41455	1.35971	1.02053	0.956112	0.984491	0.978651	0.894683	0.923262	0.925635	0.866888	0.757672	1.02117	1.0011	0.975092	extracellular	K14819	DUSP12, YVH1; dual specificity phosphatase 12 [EC:3.1.3.16 3.1.3.48]
LmxM.08.0490	hypothetical protein, conserved OS=Leishmania_mexicana_MHOM/GT/2001/U1103 GN=LmxM.08.0490	LmxM.08.0490	0.378893	0.00681312	Down	40.655	11.8	3	3	3	0	14310	14862	55826	57233	49570	26201	21860	20288	20072	20108	0	25147	22947	28673	0	0	0		0.493321	0.512351	1.92454	1.97304	1.70887	0.90325	0.753599	0.699406	0.69196	0.693201		0.866915	0.791072	0.98847				nucleus
LmxM.15.0670	hypothetical protein, conserved OS=Leishmania_mexicana_MHOM/GT/2001/U1103 GN=LmxM.15.0670	LmxM.15.0670	0.628302	0.00684727	Down	109.58	38.3	24	24	24	569210	585950	575780	1137900	1122200	1078200	801470	697070	673060	856380	800980	847460	855970	864640	891910	440960	362290	408530	0.755034	0.777239	0.763749	1.50938	1.48855	1.43019	1.06312	0.924635	0.892787	1.13595	1.06247	1.12412	1.13541	1.14691	1.18308	0.584916	0.480563	0.541898	plasma membrane
LmxM.06.0350	NAD(P)-dependent steroid dehydrogenase protein, putative OS=Leishmania_mexicana_MHOM/GT/2001/U1103 GN=LmxM.06.0350	LmxM.06.0350	0.653567	0.00694698	Down	41.269	79.1	18	18	18	423390	444700	433250	809750	794090	794230	536580	523260	524360	566680	588670	600730	538120	529990	543670	493140	502280	500170	0.751057	0.788859	0.768548	1.43643	1.40865	1.40889	0.951846	0.928218	0.930169	1.00524	1.04425	1.06564	0.954578	0.940156	0.964423	0.874787	0.891001	0.887258	cytoplasm	K07748	NSDHL, ERG26; sterol-4alpha-carboxylate 3-dehydrogenase (decarboxylating) [EC:1.1.1.170]
LmxM.23.0720	RNA recognition motif. (a.k.a. RRM, RBD, or RNP domain), putative OS=Leishmania_mexicana_MHOM/GT/2001/U1103 GN=LmxM.23.0720	LmxM.23.0720	0.290967	0.00717087	Down	59.984	19.8	7	7	7	43002	35632	43615	209110	213110	214500	67405	68046	68123	56696	53525	58201	51785	48732	46185	0	0	0	0.50485	0.418325	0.512047	2.45498	2.50194	2.51826	0.791345	0.79887	0.799774	0.665619	0.628391	0.683288	0.607964	0.572121	0.542219				nucleus
LmxM.29.0010	Alpha/beta hydrolase family, putative OS=Leishmania_mexicana_MHOM/GT/2001/U1103 GN=LmxM.29.0010	LmxM.29.0010	0.634014	0.00727343	Down	46.613	26.4	8	8	8	100880	94274	92758	189020	193470	171410	113780	117600	122940	132830	110420	133740	105790	115780	122680	57560	42080	42128	0.881844	0.824097	0.810845	1.65232	1.69122	1.49838	0.994609	1.028	1.07468	1.16114	0.965238	1.16909	0.924765	1.01209	1.07241	0.503162	0.367843	0.368262	plasma membrane	K13696	ABHD1_3; abhydrolase domain-containing protein 1/3
LmxM.20.1390	hypothetical protein, conserved OS=Leishmania_mexicana_MHOM/GT/2001/U1103 GN=LmxM.20.1390	LmxM.20.1390	0.598312	0.00734921	Down	48.299	16.2	5	5	5	100810	52094	94079	145240	146800	150130	138450	122060	122920	125380	131800	130360	135540	127630	123970	136550	123080	146060	0.805423	0.416206	0.751646	1.1604	1.17286	1.19947	1.10615	0.9752	0.982071	1.00173	1.05302	1.04151	1.0829	1.0197	0.99046	1.09097	0.983349	1.16695	nucleus
LmxM.29.1970	hypothetical protein, conserved OS=Leishmania_mexicana_MHOM/GT/2001/U1103 GN=LmxM.29.1970	LmxM.29.1970	0.644306	0.00735522	Down	49.371	16.8	6	6	6	70222	50299	74855	91655	86516	116310	89365	99294	123330	104870	97612	21925	102780	85406	128140	90018	81836	68560	0.798485	0.571943	0.851166	1.0422	0.983762	1.32255	1.01616	1.12906	1.40237	1.19246	1.10993	0.249306	1.1687	0.97114	1.45706	1.02358	0.930546	0.779587	cytoplasm
LmxM.33.2910	patatin-like phospholipase, putative OS=Leishmania_mexicana_MHOM/GT/2001/U1103 GN=LmxM.33.2910	LmxM.33.2910	0.415129	0.00740398	Down	46.06	16.9	6	6	6	32214	42342	36875	132600	116880	119840	49192	71674	46664	12477	47858	31942	37631	54746	45882	58850	122960	78314	0.509115	0.66918	0.582778	2.09563	1.84719	1.89397	0.777438	1.13275	0.737485	0.197188	0.756355	0.504816	0.594726	0.865214	0.725126	0.930075	1.94328	1.23769	cytoplasm
LmxM.32.0870	hypothetical protein, conserved OS=Leishmania_mexicana_MHOM/GT/2001/U1103 GN=LmxM.32.0870	LmxM.32.0870	0.546458	0.00740714	Down	52.306	37.6	11	11	11	65870	68543	64288	154280	154780	156590	80429	87010	94143	112920	113720	115370	101760	103550	95244	54392	63635	58550	0.679433	0.707004	0.663115	1.59136	1.59652	1.61519	0.829605	0.897486	0.971061	1.16474	1.17299	1.19001	1.04963	1.06809	0.982418	0.56104	0.656379	0.603929	cytoplasm
LmxM.29.2090	alcohol dehydrogenase, putative OS=Leishmania_mexicana_MHOM/GT/2001/U1103 GN=LmxM.29.2090	LmxM.29.2090	0.639799	0.00745804	Down	43.533	30.8	7	7	7	100750	78460	89912	118400	114520	120230	153370	168720	166030	86032	90186	81912	127400	119710	116860	168860	157900	159850	0.817222	0.63642	0.729311	0.960388	0.928916	0.975232	1.24404	1.36855	1.34673	0.697839	0.731534	0.66442	1.03339	0.971014	0.947897	1.36969	1.28079	1.29661	mitochondria	K11173	ADHFE1; hydroxyacid-oxoacid transhydrogenase [EC:1.1.99.24]
LmxM.24.2100	hypothetical protein, conserved OS=Leishmania_mexicana_MHOM/GT/2001/U1103 GN=LmxM.24.2100	LmxM.24.2100	0.630889	0.00768281	Down	33.449	49	7	7	7	60609	55623	50234	109100	108430	103870	61026	70006	75287	57654	66644	65732	74820	79411	76007	46197	50028	44050	0.869481	0.797953	0.720644	1.56512	1.55551	1.49009	0.875463	1.00429	1.08005	0.827089	0.956057	0.942974	1.07335	1.13921	1.09038	0.66273	0.717689	0.63193	extracellular
LmxM.18.1330	cholinephosphate cytidylyltransferase A, putative OS=Leishmania_mexicana_MHOM/GT/2001/U1103 GN=LmxM.18.1330	LmxM.18.1330	0.60051	0.00789574	Down	64.564	25.5	9	9	9	33762	25626	29634	62902	54825	63462	40167	39657	35475	37139	35505	42687	37012	47152	45484	0	0	0	0.803234	0.60967	0.705024	1.49651	1.30434	1.50983	0.955615	0.943482	0.843988	0.883576	0.844701	1.01557	0.880555	1.1218	1.08211				plasma membrane	K00967	PCYT2; ethanolamine-phosphate cytidylyltransferase [EC:2.7.7.14]
LmxM.36.2760	Nodulin-like, putative OS=Leishmania_mexicana_MHOM/GT/2001/U1103 GN=LmxM.36.2760	LmxM.36.2760	0.13004	0.00815785	Down	64.703	15.5	5	5	5	11736	9997.7	10353	125100	123050	135290	24142	62489	23419	10905	12410	0	0	10387	8823.2	0	0	0	0.268557	0.22878	0.23691	2.86269	2.81578	3.09587	0.552447	1.42995	0.535902	0.249541	0.283981			0.237688	0.201903				plasma membrane
LmxM.34.2260	ATP-grasp domain containing protein, putative OS=Leishmania_mexicana_MHOM/GT/2001/U1103 GN=LmxM.34.2260	LmxM.34.2260	0.543771	0.00878425	Down	57.005	41.6	12	12	12	189360	194020	200970	471830	469120	451290	247590	251550	257870	295970	287440	306650	220300	226400	222310	246870	246680	267060	0.674508	0.691108	0.715864	1.68068	1.67103	1.60751	0.881926	0.896032	0.918544	1.05426	1.02387	1.0923	0.784718	0.806447	0.791878	0.879362	0.878685	0.951279	mitochondria
LmxM.09.0590	ATP-dependent DNA helicase, putative OS=Leishmania_mexicana_MHOM/GT/2001/U1103 GN=LmxM.09.0590	LmxM.09.0590	0.551364	0.00938542	Down	107.31	20.7	12	12	12	117370	122000	112180	252330	255850	306730	130380	158090	171820	121710	149790	146790	69746	98341	111770	78027	164320	97995	0.792672	0.823941	0.757621	1.70414	1.72791	2.07154	0.880536	1.06768	1.16041	0.821983	1.01162	0.991363	0.471038	0.664157	0.754852	0.526964	1.10975	0.661821	nucleus
LmxM.24.0620	ubiquitin carboxyl-terminal hydrolase, putative OS=Leishmania_mexicana_MHOM/GT/2001/U1103 GN=LmxM.24.0620	LmxM.24.0620	0.604855	0.00955221	Down	89.206	11.5	7	7	7	49043	88854	94839	142350	126950	118860	108900	126240	146260	181830	135100	117080	105270	95590	85987	95763	71978	83221	0.447175	0.810172	0.864743	1.29795	1.15753	1.08377	0.992951	1.15106	1.3336	1.65793	1.23184	1.06754	0.959853	0.871591	0.78403	0.873168	0.656296	0.75881	nucleus	K11855	USP36_42; ubiquitin carboxyl-terminal hydrolase 36/42 [EC:3.4.19.12]
LmxM.34.3660	hypothetical protein, conserved OS=Leishmania_mexicana_MHOM/GT/2001/U1103 GN=LmxM.34.3660	LmxM.34.3660	0.389009	0.00963685	Down	155.88	4.8	4	4	4	0	10601	10149	37181	42614	33628	18783	13397	14419	0	18174	0	0	17255	22245	0	0	0		0.489046	0.468194	1.71524	1.96587	1.55133	0.866498	0.618031	0.665178		0.838404			0.796008	1.02621				extracellular
LmxM.34.0860	hypothetical protein, conserved OS=Leishmania_mexicana_MHOM/GT/2001/U1103 GN=LmxM.34.0860	LmxM.34.0860	0.541892	0.00974892	Down	46.341	22.8	8	8	8	31279	24472	32744	71361	63421	66012	45336	41473	39012	41083	45969	43664	32533	31053	34523	0	28410	25955	0.761482	0.595767	0.797147	1.73727	1.54397	1.60705	1.1037	1.00965	0.949741	1.00016	1.11911	1.06299	0.792011	0.75598	0.840457		0.691637	0.63187	mitochondria
LmxM.08_29.2370	60S ribosomal protein L39, putative OS=Leishmania_mexicana_MHOM/GT/2001/U1103 GN=LmxM.08_29.2370	LmxM.08_29.2370	0.16683	0.0099447	Down	6.4857	39.2	3	3	3	87391	43180	88514	779820	627600	784410	177200	119870	137540	261890	187710	267340	201860	215030	222880	189200	192860	204470	0.328485	0.162305	0.332706	2.93119	2.35902	2.94844	0.666059	0.450567	0.516985	0.984392	0.705564	1.00488	0.758751	0.808254	0.837761	0.711165	0.724922	0.768561	cytoplasm	K02924	RP-L39e, RPL39; large subunit ribosomal protein L39e
LmxM.13.0050	ribonuclease HII, putative OS=Leishmania_mexicana_MHOM/GT/2001/U1103 GN=LmxM.13.0050	LmxM.13.0050	0.565267	0.0102109	Down	28.717	45.1	9	9	9	54078	93228	68807	145670	156510	154230	103490	101590	103150	91468	103230	105500	79798	80285	78381	95298	95932	110760	0.534425	0.921324	0.679984	1.43958	1.54671	1.52418	1.02274	1.00396	1.01938	0.903931	1.02017	1.0426	0.788602	0.793415	0.774599	0.941781	0.948046	1.09458	extracellular
LmxM.08.0190	hypothetical protein, unknown function OS=Leishmania_mexicana_MHOM/GT/2001/U1103 GN=LmxM.08.0190	LmxM.08.0190	0.5403	0.0102258	Down	103.99	7.4	6	6	6	30743	42281	0	76357	81643	74869	67802	49410	55383	57678	54437	51132	21120	59779	53857	48681	44420	53230	0.56634	0.77889		1.40663	1.50401	1.37922	1.24903	0.910219	1.02025	1.06253	1.00283	0.941941	0.389067	1.10123	0.99214	0.896789	0.818294	0.98059	plasma membrane
LmxM.25.2350	hypothetical protein, conserved OS=Leishmania_mexicana_MHOM/GT/2001/U1103 GN=LmxM.25.2350	LmxM.25.2350	0.612919	0.0106108	Down	39.157	15.1	4	4	4	26835	28961	22133	56401	50446	49544	33078	34481	30338	0	15033	0	42719	44488	36704	14366	0	9856.6	0.812552	0.876926	0.670178	1.7078	1.52748	1.50017	1.00159	1.04407	0.918621		0.455193		1.29351	1.34708	1.11138	0.434996		0.298454	cytoplasm,nucleus
LmxM.28.1610	hypothetical protein, conserved OS=Leishmania_mexicana_MHOM/GT/2001/U1103 GN=LmxM.28.1610	LmxM.28.1610	0.400682	0.0115955	Down	36.11	22.6	6	6	6	58608	24904	30370	130620	128810	85048	85715	89967	48281	68155	98999	0	84718	70600	0	37624	33172	36680	0.843075	0.358244	0.436872	1.87897	1.85293	1.22341	1.23301	1.29417	0.694521	0.980409	1.4241		1.21867	1.01558		0.541221	0.477179	0.527641	nucleus
LmxM.30.0590	C-5 sterol desaturase, putative OS=Leishmania_mexicana_MHOM/GT/2001/U1103 GN=LmxM.30.0590	LmxM.30.0590	0.563505	0.0119632	Down	31.44	14.2	3	3	3	78303	83179	72164	103970	110540	107890	181070	188610	137180	0	38233	80531	72283	52164	81009	140130	128270	58650	0.776554	0.824911	0.715672	1.0311	1.09626	1.06998	1.79573	1.8705	1.36046		0.379168	0.79865	0.716852	0.517326	0.803391	1.38971	1.27209	0.58165	plasma membrane
LmxM.08.0250	hypothetical protein, conserved OS=Leishmania_mexicana_MHOM/GT/2001/U1103 GN=LmxM.08.0250	LmxM.08.0250	0.443915	0.011965	Down	12.854	37.2	3	3	3	51294	50015	53906	68694	68311	79625	211080	128520	143070	42228	55338	46286	0	44745	54132	484450	546710	483420	0.333866	0.325541	0.350867	0.44712	0.444627	0.518268	1.37389	0.836519	0.931223	0.274856	0.360187	0.301269		0.291239	0.352338	3.15322	3.55846	3.14651	extracellular
LmxM.23.1035	hypothetical protein, unknown function OS=Leishmania_mexicana_MHOM/GT/2001/U1103 GN=LmxM.23.1035	LmxM.23.1035	0.53564	0.0119904	Down	73.396	11.5	5	5	5	26113	0	40161	70567	72008	69891	61332	44002	53386	56526	54805	49834	55771	57286	59179	48827	33242	28508	0.503633		0.774572	1.361	1.38879	1.34796	1.18289	0.848652	1.02964	1.0902	1.05701	0.961132	1.07564	1.10486	1.14137	0.94171	0.641127	0.549824	nucleus
LmxM.36.3720	Protein of unknown function (DUF498/DUF598), putative OS=Leishmania_mexicana_MHOM/GT/2001/U1103 GN=LmxM.36.3720	LmxM.36.3720	0.608421	0.0123309	Down	72.584	37.5	15	15	15	63833	67584	66432	143780	133790	133190	83672	77670	78267	96830	105630	97044	78679	79818	71090	81197	84578	83778	0.706264	0.747766	0.73502	1.59082	1.48029	1.47365	0.925768	0.85936	0.865965	1.07135	1.16872	1.07372	0.870524	0.883126	0.786557	0.898384	0.935792	0.92694	nucleus	K09008	NDUFAF3; NADH dehydrogenase [ubiquinone] 1 alpha subcomplex assembly factor 3
LmxM.07.1160	amino acid transporter 19, putative OS=Leishmania_mexicana_MHOM/GT/2001/U1103 GN=LmxM.07.1160	LmxM.07.1160	0.583684	0.0126208	Down	53.739	17.7	5	5	5	206360	189090	182260	474470	379420	417570	230960	239150	237960	252520	229640	210390	262730	237140	235180	723910	667700	661500	0.615189	0.563705	0.543343	1.41446	1.13111	1.24484	0.688525	0.712941	0.709393	0.752799	0.68459	0.627203	0.783236	0.706949	0.701106	2.15808	1.99051	1.97203	plasma membrane	K14996	SLC38A10; solute carrier family 38 (sodium-coupled neutral amino acid transporter), member 10
LmxM.11.0860	hypothetical protein, conserved OS=Leishmania_mexicana_MHOM/GT/2001/U1103 GN=LmxM.11.0860	LmxM.11.0860	0.572403	0.012784	Down	187.73	8.3	12	12	12	29663	30276	21752	54148	53419	64765	36324	34886	41890	34141	17541	35837	33895	32214	29911	27782	29231	33109	0.833251	0.850471	0.611026	1.52105	1.50057	1.81929	1.02036	0.979968	1.17671	0.959041	0.492737	1.00668	0.952131	0.90491	0.840218	0.780413	0.821116	0.930051	plasma membrane
LmxM.11.0220	pterin-4-alpha-carbinolamine dehydratase, putative OS=Leishmania_mexicana_MHOM/GT/2001/U1103 GN=LmxM.11.0220	LmxM.11.0220	0.355602	0.0128703	Down	12.547	73	6	6	6	46877	35034	0	77006	79191	78616	139030	162520	154670	80366	67653	80240	65690	78905	78341	611160	662530	707630	0.24861	0.185801		0.408398	0.419986	0.416936	0.737339	0.861917	0.820285	0.426217	0.358794	0.425549	0.348384	0.418469	0.415478	3.24126	3.5137	3.75288	mitochondria	K01724	PCBD, phhB; 4a-hydroxytetrahydrobiopterin dehydratase [EC:4.2.1.96]
LmxM.22.1290	ribonucleoside-diphosphate reductase small chain, putative OS=Leishmania_mexicana_MHOM/GT/2001/U1103 GN=LmxM.22.1290	LmxM.22.1290	0.272641	0.0129696	Down	44.409	63	20	2	2	0	73218	100520	271650	0	519310	254960	0	228560	0	0	0	174550	243190	0	90871	0	0		0.33675	0.462319	1.24939		2.38845	1.17263		1.05121				0.802804	1.1185		0.417941			cytoplasm	K10808	RRM2; ribonucleoside-diphosphate reductase subunit M2 [EC:1.17.4.1]
LmxM.17.0840	hypothetical protein, conserved OS=Leishmania_mexicana_MHOM/GT/2001/U1103 GN=LmxM.17.0840	LmxM.17.0840	0.637848	0.0129903	Down	57.21	30.6	12	12	12	180810	179740	185110	362860	359220	340220	204890	223860	219890	295230	277620	283740	219600	222270	238110	138440	136710	148350	0.771837	0.767269	0.790192	1.54897	1.53343	1.45232	0.874629	0.955607	0.93866	1.26027	1.1851	1.21122	0.937422	0.94882	1.01644	0.590969	0.583584	0.633272	nucleus
LmxM.26.0540	hypothetical protein, conserved OS=Leishmania_mexicana_MHOM/GT/2001/U1103 GN=LmxM.26.0540	LmxM.26.0540	0.588384	0.0133097	Down	119.92	22.4	14	13	14	135650	112830	122140	255420	275480	280230	142330	151050	155280	181470	175700	156140	170130	156790	179370	64734	89267	65127	0.851022	0.707857	0.766265	1.60242	1.72827	1.75807	0.89293	0.947637	0.974174	1.13848	1.10228	0.979569	1.06734	0.983647	1.12531	0.406119	0.560031	0.408585	nucleus
LmxM.34.4030	ATP-dependent RNA helicase, putative OS=Leishmania_mexicana_MHOM/GT/2001/U1103 GN=LmxM.34.4030	LmxM.34.4030	0.665509	0.0145675	Down	78.928	29.3	15	15	15	113080	116930	105470	195260	216460	201580	113380	134330	147180	145330	141990	153350	105410	108770	112310	119200	129050	128420	0.818267	0.846127	0.7632	1.41294	1.56634	1.45867	0.820438	0.972036	1.06502	1.05163	1.02747	1.10967	0.762766	0.787079	0.812695	0.862553	0.933829	0.92927	nucleus	K14809	DDX55, SPB4; ATP-dependent RNA helicase DDX55/SPB4 [EC:3.6.4.13]
LmxM.28.2385	DNA replication licensing factor, putative OS=Leishmania_mexicana_MHOM/GT/2001/U1103 GN=LmxM.28.2385	LmxM.28.2385	0.542733	0.0149247	Down	96.797	32.5	19	19	19	393580	388100	402500	707270	1038200	973230	570850	543660	530560	427300	386370	440630	427390	408730	457710	104650	108650	128530	0.839597	0.827906	0.858625	1.50877	2.21472	2.07612	1.21775	1.15975	1.13181	0.911529	0.824216	0.939965	0.911721	0.871915	0.976401	0.223242	0.231775	0.274184	nucleus	K02542	MCM6; DNA replication licensing factor MCM6 [EC:5.6.2.3]
LmxM.26.1620	CDP-DAG synthase, putative OS=Leishmania_mexicana_MHOM/GT/2001/U1103 GN=LmxM.26.1620	LmxM.26.1620	0.623854	0.0156095	Down	48.614	24.5	5	5	5	0	65381	85922	88128	134570	128060	110560	132710	133560	65085	108910	58667	78447	109770	98052	55118	95551	67820		0.687663	0.903709	0.926911	1.41538	1.34691	1.16285	1.39581	1.40475	0.68455	1.14549	0.617046	0.825088	1.15454	1.03129	0.579719	1.00498	0.713316	plasma membrane	K00981	E2.7.7.41, CDS1, CDS2, cdsA; phosphatidate cytidylyltransferase [EC:2.7.7.41]
LmxM.26.2460	hypothetical protein, conserved OS=Leishmania_mexicana_MHOM/GT/2001/U1103 GN=LmxM.26.2460	LmxM.26.2460	0.358335	0.0160069	Down	48.015	21.7	5	5	5	11547	0	10558	48039	38652	34687	19763	25935	17988	0	0	9994.6	21390	25647	25463	14836	0	19928	0.498287		0.455609	2.07302	1.66795	1.49685	0.852831	1.11917	0.776235			0.431296	0.923041	1.10674	1.0988	0.640217		0.859951	mitochondria
LmxM.29.0530	glycosyltransferase family 28 protein, putative OS=Leishmania_mexicana_MHOM/GT/2001/U1103 GN=LmxM.29.0530	LmxM.29.0530	0.486232	0.0163784	Down	47.302	29.1	7	7	7	30957	35367	29871	88677	92977	70585	52074	36759	54603	41770	32553	34276	62260	53440	50416	27835	24751	19181	0.664668	0.759354	0.641351	1.90396	1.99628	1.51551	1.11806	0.789241	1.17236	0.896831	0.698936	0.73593	1.33677	1.14739	1.08247	0.597637	0.531421	0.411829	plasma membrane	K07441	ALG14; beta-1,4-N-acetylglucosaminyltransferase [EC:2.4.1.141]
LmxM.33.0390	hypothetical protein, unknown function OS=Leishmania_mexicana_MHOM/GT/2001/U1103 GN=LmxM.33.0390	LmxM.33.0390	0.632305	0.016636	Down	22.697	63.7	7	7	7	37338	50451	61239	69286	69389	58912	87104	94597	92092	110180	105000	97780	52494	36123	40068	51411	66586	73092	0.536319	0.724673	0.879631	0.995217	0.996696	0.846206	1.25115	1.35878	1.3228	1.58261	1.50821	1.4045	0.754018	0.518867	0.575533	0.738462	0.956434	1.04989	nucleus
LmxM.31.3000	Domain of unknown function DUF21, putative OS=Leishmania_mexicana_MHOM/GT/2001/U1103 GN=LmxM.31.3000	LmxM.31.3000	0.661883	0.0177018	Down	44.093	17.7	5	5	5	29942	22456	29461	48775	48161	48248	35713	32898	33557	36507	35407	38978	36202	36744	35044	0	0	0	0.819441	0.614567	0.806277	1.33486	1.31805	1.32043	0.97738	0.90034	0.918375	0.99911	0.969005	1.06674	0.990763	1.0056	0.959071				plasma membrane	K16302	CNNM; metal transporter CNNM
LmxM.30.1170	cytochrome b5-like Heme/Steroid binding domain containing protein, putative OS=Leishmania_mexicana_MHOM/GT/2001/U1103 GN=LmxM.30.1170	LmxM.30.1170	0.365663	0.01787	Down	12.442	78.6	6	6	6	325370	309490	327050	1297400	1311000	1345500	405730	456170	445390	503450	503600	537970	429150	422460	430630	376100	333650	357040	0.578884	0.550631	0.581873	2.30828	2.33248	2.39386	0.721857	0.811598	0.792419	0.895717	0.895984	0.957133	0.763525	0.751623	0.766158	0.669141	0.593616	0.63523	peroxisome	K23490	CYB5; cytochrome b5
LmxM.23.0700	hypothetical protein, conserved OS=Leishmania_mexicana_MHOM/GT/2001/U1103 GN=LmxM.23.0700	LmxM.23.0700	0.559778	0.0183552	Down	13.398	48.7	4	4	4	19491	22697	25949	40790	40002	41123	39105	41406	41017	25866	23091	25911	29207	28071	28101	62697	62924	62410	0.531687	0.619142	0.707852	1.11269	1.0912	1.12178	1.06673	1.1295	1.11889	0.705588	0.62989	0.706816	0.796726	0.765737	0.766556	1.71029	1.71648	1.70246	extracellular
LmxM.04.0490	hypothetical protein, conserved OS=Leishmania_mexicana_MHOM/GT/2001/U1103 GN=LmxM.04.0490	LmxM.04.0490	0.404987	0.0186106	Down	34.494	31.5	6	6	6	0	26048	34791	115140	94176	93057	49884	49571	48846	88423	80413	94158	79970	84497	86697	0	23998	0		0.372232	0.497171	1.64538	1.3458	1.3298	0.712853	0.70838	0.69802	1.26358	1.14912	1.34554	1.14279	1.20748	1.23892		0.342937		nucleus
LmxM.22.1080	hypothetical protein, conserved OS=Leishmania_mexicana_MHOM/GT/2001/U1103 GN=LmxM.22.1080	LmxM.22.1080	0.471234	0.0193441	Down	27.66	42.7	7	7	7	161020	124000	140080	432100	453250	366850	136910	202000	213090	127120	167960	108280	134470	132850	144820	220310	195900	194610	0.79285	0.610567	0.689743	2.12763	2.23177	1.80634	0.674135	0.994633	1.04924	0.625929	0.827023	0.533163	0.66212	0.654143	0.713083	1.08479	0.964597	0.958245	mitochondria
LmxM.36.2010	hypothetical protein, conserved OS=Leishmania_mexicana_MHOM/GT/2001/U1103 GN=LmxM.36.2010	LmxM.36.2010	0.664176	0.019989	Down	40.6	21.6	6	6	6	57928	41678	52734	92767	86942	89475	61468	67591	60491	51613	49694	53942	59181	61653	66254	57572	48913	56701	0.933823	0.671866	0.850094	1.49544	1.40154	1.44237	0.990889	1.08959	0.97514	0.832023	0.801088	0.869567	0.954022	0.993872	1.06804	0.928084	0.788498	0.914043	mitochondria
LmxM.30.2860	protein kinase, putative OS=Leishmania_mexicana_MHOM/GT/2001/U1103 GN=LmxM.30.2860	LmxM.30.2860	0.65195	0.0205811	Down	75.75	19.4	10	10	10	131510	121790	97827	225830	210190	199640	152660	131550	157290	174310	176350	160270	133580	130570	130530	94436	94554	84074	0.908023	0.84091	0.675455	1.55926	1.45128	1.37843	1.05405	0.908299	1.08602	1.20354	1.21762	1.1066	0.922315	0.901532	0.901256	0.652042	0.652857	0.580497	nucleus	K08864	TLK; tousled-like kinase [EC:2.7.11.1]
LmxM.10.0360	pteridine transporter ft6, putative OS=Leishmania_mexicana_MHOM/GT/2001/U1103 GN=LmxM.10.0360	LmxM.10.0360	0.492589	0.021391	Down	71.92	19.2	10	7	10	332460	287780	305170	890280	904090	834370	391530	388720	348340	463210	423150	446690	255570	240820	150890	70623	67589	67091	0.871281	0.754187	0.799761	2.33316	2.36936	2.18664	1.02609	1.01872	0.912897	1.21394	1.10895	1.17064	0.669774	0.631119	0.395439	0.185082	0.177131	0.175826	plasma membrane
LmxM.18.1500	hypothetical protein, conserved OS=Leishmania_mexicana_MHOM/GT/2001/U1103 GN=LmxM.18.1500	LmxM.18.1500	0.649782	0.0214458	Down	120.38	10.1	8	7	8	34840	23853	18467	47665	44742	42562	36416	34239	31871	44838	66266	32281	41240	33250	33662	61105	38582	60319	0.863566	0.591235	0.457735	1.18145	1.109	1.05497	0.90263	0.848669	0.789975	1.11138	1.64251	0.800137	1.0222	0.824155	0.834367	1.51459	0.956318	1.4951	extracellular
LmxM.23.0010	hypothetical protein, conserved OS=Leishmania_mexicana_MHOM/GT/2001/U1103 GN=LmxM.23.0010	LmxM.23.0010	0.494583	0.0218067	Down	67.43	24	11	11	11	38688	37611	33142	108920	104420	95313	46533	38976	48397	38106	37963	39358	44001	46457	41166	26960	37089	40950	0.770294	0.74885	0.659871	2.16864	2.07904	1.89772	0.926491	0.776028	0.963604	0.758706	0.755859	0.783634	0.876078	0.924978	0.819632	0.536784	0.738457	0.815331	cytoplasm,nucleus
LmxM.24.0040	60S ribosomal protein L17, putative OS=Leishmania_mexicana_MHOM/GT/2001/U1103 GN=LmxM.24.0040	LmxM.24.0040	0.430788	0.0221103	Down	19.083	38.6	7	7	7	1469100	1334000	1426100	4348100	4631900	5332200	1772100	1782100	1768300	2353500	2436000	2350200	1956100	2227900	2265200	855460	1062600	1231200	0.651292	0.591399	0.632229	1.92763	2.05345	2.36391	0.78562	0.790054	0.783936	1.04337	1.07995	1.04191	0.867192	0.987689	1.00422	0.379249	0.47108	0.545825	cytoplasm	K02880	RP-L17e, RPL17; large subunit ribosomal protein L17e
LmxM.19.1210	Fcf1, putative OS=Leishmania_mexicana_MHOM/GT/2001/U1103 GN=LmxM.19.1210	LmxM.19.1210	0.506082	0.0226879	Down	23.91	42.6	7	7	7	42114	28534	35335	104920	89577	93063	49129	39860	42288	62543	60500	71358	59898	53324	53913	64701	71096	108310	0.670568	0.454338	0.562628	1.67061	1.42631	1.48181	0.782265	0.634678	0.673338	0.995852	0.963322	1.13621	0.953737	0.849061	0.858439	1.03021	1.13204	1.72459	extracellular	K14566	UTP24, FCF1; U3 small nucleolar RNA-associated protein 24
LmxM.36.1950	DNA mismatch repair protein MSH6, putative OS=Leishmania_mexicana_MHOM/GT/2001/U1103 GN=LmxM.36.1950	LmxM.36.1950	0.402456	0.0227988	Down	111.51	30.3	21	21	21	53729	48948	35959	204800	151930	152500	69003	51930	58786	93215	81740	77092	60710	46870	52805	29527	17649	23072	0.738112	0.672432	0.493993	2.81348	2.08717	2.095	0.947941	0.713398	0.807583	1.28056	1.12292	1.05907	0.834014	0.643885	0.725418	0.405632	0.242456	0.316956	nucleus	K08737	MSH6; DNA mismatch repair protein MSH6
LmxM.14.0420	Iguana/Dzip1-like DAZ-interacting protein N-terminal, putative OS=Leishmania_mexicana_MHOM/GT/2001/U1103 GN=LmxM.14.0420	LmxM.14.0420	0.493051	0.0228251	Down	84.392	9.9	5	5	5	46993	38368	52574	140970	115160	106730	54346	77411	64899	86121	81907	76743	102890	101350	110430	0	0	66342	0.56822	0.46393	0.635703	1.70455	1.39247	1.29054	0.657129	0.936022	0.784732	1.04134	0.990386	0.927945	1.2441	1.22548	1.33527			0.80218	nucleus	K16470	DZIP1; zinc finger protein DZIP1
LmxM.32.0750	hypothetical protein, conserved OS=Leishmania_mexicana_MHOM/GT/2001/U1103 GN=LmxM.32.0750	LmxM.32.0750	0.320416	0.023031	Down	84.11	11.6	6	6	6	0	48333	28159	192380	93548	92577	98949	0	0	0	61144	56744	64474	0	0	83851	36975	0		0.62028	0.361378	2.4689	1.20055	1.18808	1.26986				0.784689	0.728222	0.827425			1.0761	0.474517		nucleus
LmxM.01.0100	Glycosyl transferase family 11, putative OS=Leishmania_mexicana_MHOM/GT/2001/U1103 GN=LmxM.01.0100	LmxM.01.0100	0.634588	0.0230349	Down	35.254	37.1	5	5	5	27541	15368	20901	30234	35982	28205	41235	39967	25484	26021	20549	21816	39355	39692	34578	42661	35031	33723	0.887874	0.495437	0.673812	0.974691	1.16	0.90928	1.32934	1.28847	0.82156	0.838871	0.662464	0.70331	1.26874	1.2796	1.11473	1.37532	1.12934	1.08717	mitochondria
LmxM.08_29.2830	RNA recognition motif. (a.k.a. RRM, RBD, or RNP domain), putative OS=Leishmania_mexicana_MHOM/GT/2001/U1103 GN=LmxM.08_29.2830	LmxM.08_29.2830	0.504816	0.0231544	Down	23.539	42.9	7	7	7	1053300	990610	1093800	2859300	2920400	2887800	1227700	1253800	1282100	1389600	1543700	1456300	1107000	1094100	1119800	1684300	1706500	1618400	0.670216	0.630326	0.695986	1.81937	1.85825	1.83751	0.781186	0.797794	0.815801	0.884204	0.982257	0.926645	0.704385	0.696177	0.71253	1.07172	1.08585	1.02979	nucleus	K14407	CSTF2, RNA15; cleavage stimulation factor subunit 2
LmxM.13.0690	PSP1 C-terminal conserved region, putative OS=Leishmania_mexicana_MHOM/GT/2001/U1103 GN=LmxM.13.0690	LmxM.13.0690	0.642652	0.0233234	Down	98.094	27.4	16	16	16	451650	419870	422210	874390	872830	816190	485080	473630	504100	563810	544410	563370	377940	355580	369520	163570	178640	143610	0.947473	0.880805	0.885714	1.8343	1.83103	1.71221	1.0176	0.993583	1.0575	1.18276	1.14207	1.18184	0.792844	0.745937	0.775181	0.343138	0.374752	0.301266	nucleus
LmxM.36.0360	Integral membrane protein DUF106, putative OS=Leishmania_mexicana_MHOM/GT/2001/U1103 GN=LmxM.36.0360	LmxM.36.0360	0.46438	0.0233622	Down	29.786	25.9	5	5	5	85735	0	69343	259570	182600	192530	121350	124870	120920	125070	115990	124960	99929	84657	89321	72197	59301	68147	0.730029		0.590452	2.21022	1.55483	1.63938	1.03329	1.06326	1.02963	1.06496	0.987648	1.06403	0.85089	0.72085	0.760563	0.614753	0.504945	0.580268	endoplasmic reticulum	K23564	EMC3, TMEM111; ER membrane protein complex subunit 3
LmxM.19.0440	nucleosome assembly protein, putative OS=Leishmania_mexicana_MHOM/GT/2001/U1103 GN=LmxM.19.0440	LmxM.19.0440	0.558116	0.0239252	Down	39.825	23.3	8	8	8	340360	317390	324660	396850	396340	358220	742180	805720	821140	249710	241860	207010	513890	549860	542450	639850	674170	691050	0.695187	0.648271	0.66312	0.810568	0.809526	0.731666	1.51591	1.64569	1.67718	0.510034	0.494	0.422819	1.04962	1.12309	1.10796	1.3069	1.377	1.41147	cytoplasm	K11279	NAP1L1, NRP; nucleosome assembly protein 1-like 1
LmxM.25.0050	hypothetical protein, conserved OS=Leishmania_mexicana_MHOM/GT/2001/U1103 GN=LmxM.25.0050	LmxM.25.0050	0.541789	0.0242492	Down	18.989	24	3	3	3	0	26054	25497	53194	60277	0	41360	32140	50903	0	0	48948	0	48773	0	0	0	0		0.605678	0.59273	1.2366	1.40126		0.961498	0.74716	1.18334			1.1379		1.13383					nucleus
LmxM.15.1160	tryparedoxin peroxidase OS=Leishmania_mexicana_MHOM/GT/2001/U1103 GN=LmxM.15.1160	LmxM.15.1160	0.642696	0.024254	Down	22.21	81.9	24	6	6	8150100	10613000	8644400	10157000	9769100	11912000	17781000	17170000	18500000	7672500	8199900	6674600	8693800	9207300	7939300	15842000	17272000	16182000	0.697318	0.908043	0.73961	0.869027	0.835839	1.01918	1.52133	1.46906	1.58285	0.656455	0.701579	0.571075	0.743837	0.787772	0.679282	1.35543	1.47778	1.38452	cytoplasm	K13279	PRDX1; peroxiredoxin 1 [EC:1.11.1.24]
LmxM.03.0250	ribosomal protein L38, putative OS=Leishmania_mexicana_MHOM/GT/2001/U1103 GN=LmxM.03.0250	LmxM.03.0250	0.459078	0.0242848	Down	9.4541	26.5	4	4	4	709820	737640	769990	2741900	1932700	2252700	918700	901650	912800	1181100	1193200	1180200	1171800	1184200	1089100	456400	457310	438680	0.631578	0.656332	0.685116	2.43967	1.71966	2.00439	0.817434	0.802263	0.812184	1.05091	1.06168	1.05011	1.04264	1.05367	0.969051	0.406092	0.406902	0.390325	extracellular	K02923	RP-L38e, RPL38; large subunit ribosomal protein L38e
LmxM.28.0590	hypothetical protein, unknown function OS=Leishmania_mexicana_MHOM/GT/2001/U1103 GN=LmxM.28.0590	LmxM.28.0590	0.547978	0.0248614	Down	56.338	38.2	12	12	12	56808	41329	49286	124800	108920	105020	55459	78229	65634	62124	69273	68429	52052	54849	47815	24868	0	20452	0.889795	0.647344	0.771976	1.95477	1.70604	1.64495	0.868665	1.22532	1.02804	0.97306	1.08504	1.07182	0.815301	0.85911	0.748936	0.389512		0.320344	nucleus
LmxM.24.0460	ubiquitin-activating enzyme, putative OS=Leishmania_mexicana_MHOM/GT/2001/U1103 GN=LmxM.24.0460	LmxM.24.0460	0.565074	0.0252643	Down	31.994	28.1	5	5	5	44536	49111	58602	130270	109560	117670	70825	60078	50461	65126	78163	63958	57491	50766	47866	19178	26042	23067	0.713991	0.787337	0.939494	2.08846	1.75644	1.88646	1.13545	0.963157	0.80898	1.04409	1.25309	1.02536	0.921683	0.813869	0.767377	0.307457	0.4175	0.369805	nucleus	K22132	tcdA; tRNA threonylcarbamoyladenosine dehydratase
LmxM.36.0740	hypothetical protein, conserved OS=Leishmania_mexicana_MHOM/GT/2001/U1103 GN=LmxM.36.0740	LmxM.36.0740	0.396977	0.0258379	Down	60.91	56.9	23	23	23	614030	599950	594100	2287300	2242400	2320500	761670	758810	738570	572510	582230	564410	690930	693000	708620	737090	738920	707210	0.653523	0.638537	0.632311	2.43441	2.38663	2.46975	0.810659	0.807615	0.786073	0.609332	0.619677	0.600711	0.735369	0.737572	0.754197	0.784498	0.786445	0.752696	nucleus
LmxM.03.0510	hypothetical protein, conserved OS=Leishmania_mexicana_MHOM/GT/2001/U1103 GN=LmxM.03.0510	LmxM.03.0510	0.444042	0.0264494	Down	259.4	2.4	4	4	4	14586	0	15663	35372	25160	41651	0	0	0	0	22512	28789	32769	16859	11893	0	0	0	0.59473		0.638644	1.44226	1.02588	1.69828					0.917906	1.17384	1.33612	0.68741	0.484926				nucleus
LmxM.03.0680	Uroporphyrinogen-III synthase HemD, putative OS=Leishmania_mexicana_MHOM/GT/2001/U1103 GN=LmxM.03.0680	LmxM.03.0680	0.66155	0.0279787	Down	30.382	25.2	5	5	5	163710	149570	209040	0	0	0	246310	302800	240430	224820	217040	260440	191760	148820	173580	213290	169990	224600	0.783002	0.715372	0.999809				1.17807	1.44825	1.14994	1.07528	1.03807	1.24565	0.917161	0.711785	0.830209	1.02014	0.813038	1.07423	cytoplasm,nucleus
LmxM.15.0050	cytochrome-b5 reductase, putative OS=Leishmania_mexicana_MHOM/GT/2001/U1103 GN=LmxM.15.0050	LmxM.15.0050	0.624936	0.0281502	Down	31.525	73.5	19	19	19	461770	481640	466680	965570	982600	984680	520270	516480	543150	498270	487030	483210	539510	541640	528730	951200	923450	947830	0.702982	0.733232	0.710457	1.46995	1.49588	1.49904	0.792041	0.786271	0.826872	0.758549	0.741437	0.735622	0.821331	0.824574	0.80492	1.44807	1.40583	1.44294	cytoplasm	K00326	E1.6.2.2; cytochrome-b5 reductase [EC:1.6.2.2]
LmxM.20.1280	calpain-like cysteine peptidase, putative OS=Leishmania_mexicana_MHOM/GT/2001/U1103 GN=LmxM.20.1280	LmxM.20.1280	0.602109	0.0283138	Down	16.9	77.5	10	10	10	2603100	2857500	2823300	5952900	5994500	6241600	3082500	3127400	3117400	3570300	3868700	3829300	2746400	2663600	2767200	3004000	3056000	3080300	0.727733	0.798854	0.789293	1.66422	1.67585	1.74493	0.861756	0.874308	0.871512	0.998127	1.08155	1.07053	0.767794	0.744646	0.773609	0.83981	0.854347	0.861141	cytoplasm
LmxM.30.0810	hypothetical protein, conserved OS=Leishmania_mexicana_MHOM/GT/2001/U1103 GN=LmxM.30.0810	LmxM.30.0810	0.588135	0.0287578	Down	70.649	25.7	12	12	12	80277	80299	75218	202440	163080	167880	87902	89246	91288	117710	124870	122690	96914	88186	81038	36471	36120	40670	0.810743	0.810965	0.75965	2.04451	1.647	1.69547	0.88775	0.901324	0.921946	1.18879	1.2611	1.23909	0.978765	0.890618	0.818428	0.368332	0.364787	0.410739	plasma membrane
LmxM.34.1370	Iron-binding zinc finger CDGSH type, putative OS=Leishmania_mexicana_MHOM/GT/2001/U1103 GN=LmxM.34.1370	LmxM.34.1370	0.557137	0.0288261	Down	13.703	39.2	4	4	4	73536	73290	75474	195480	118430	118200	99776	181070	85052	65542	64404	67768	71867	69917	65413	46336	0	48152	0.822601	0.819849	0.84428	2.18671	1.3248	1.32223	1.11613	2.02552	0.951423	0.733177	0.720447	0.758078	0.803931	0.782117	0.731734	0.518331		0.538646	extracellular	K23886	CISD3; CDGSH iron-sulfur domain-containing protein 3
LmxM.18.1470	hypothetical protein, conserved OS=Leishmania_mexicana_MHOM/GT/2001/U1103 GN=LmxM.18.1470	LmxM.18.1470	0.374067	0.0291139	Down	39.583	33.5	8	8	8	7971	55263	69083	138930	102240	177750	95851	94252	98428	137990	36111	82792	131500	108370	109960	269430	266380	237640	0.0646314	0.44809	0.560147	1.12649	0.828995	1.44125	0.777191	0.764226	0.798086	1.11887	0.2928	0.671304	1.06624	0.878699	0.891591	2.18463	2.1599	1.92686	cytoplasm
LmxM.28.2900	oligomeric golgi complex component 8, putative OS=Leishmania_mexicana_MHOM/GT/2001/U1103 GN=LmxM.28.2900	LmxM.28.2900	0.405462	0.0305689	Down	58.249	13	4	4	4	13558	0	10008	38462	40104	34450	19843	26520	14985	13641	15011	15627	25088	19719	33205	22934	16473	16655	0.612534		0.452149	1.73767	1.81185	1.55641	0.896482	1.19814	0.677004	0.616283	0.678178	0.706009	1.13344	0.89088	1.50016	1.03613	0.74423	0.752452	nucleus	K20295	COG8; conserved oligomeric Golgi complex subunit 8
LmxM.08_29.1590	hypothetical protein, unknown function OS=Leishmania_mexicana_MHOM/GT/2001/U1103 GN=LmxM.08_29.1590	LmxM.08_29.1590	0.647233	0.0310552	Down	105.56	8.2	5	5	5	161680	78719	158300	239910	247890	196260	189270	178350	180330	150140	227890	261070	174880	157320	163060	0	0	0	0.877085	0.427036	0.858749	1.30147	1.34476	1.06468	1.02676	0.967517	0.978258	0.814482	1.23626	1.41626	0.948692	0.853433	0.884571				nucleus
LmxM.34.4550	hypothetical protein, conserved OS=Leishmania_mexicana_MHOM/GT/2001/U1103 GN=LmxM.34.4550	LmxM.34.4550	0.5404	0.0322473	Down	161.11	35	37	37	37	267070	259200	243030	667850	640340	666180	293210	294390	285180	388020	414560	397970	251430	251150	238180	158940	149590	143060	0.799963	0.77639	0.727956	2.00043	1.91803	1.99543	0.878261	0.881796	0.854209	1.16225	1.24174	1.19205	0.753116	0.752278	0.713428	0.476078	0.448072	0.428512	extracellular
LmxM.14.0490	Amastin surface glycoprotein, putative OS=Leishmania_mexicana_MHOM/GT/2001/U1103 GN=LmxM.14.0490	LmxM.14.0490	0.407883	0.0325525	Down	30.15	21.7	6	6	6	298270	305290	294630	1101500	1113300	1117400	366030	345590	360330	378700	374060	373290	247820	253690	244120	170780	173190	167640	0.698558	0.714999	0.690033	2.57975	2.60739	2.61699	0.857254	0.809383	0.843905	0.886928	0.876061	0.874258	0.580403	0.59415	0.571737	0.399972	0.405617	0.392618	plasma membrane
LmxM.34.2970	hypothetical protein, conserved OS=Leishmania_mexicana_MHOM/GT/2001/U1103 GN=LmxM.34.2970	LmxM.34.2970	0.619151	0.0330653	Down	40.486	29.7	10	10	10	128730	62156	127410	164000	138660	181750	237530	158610	147620	125600	167120	166390	181760	130060	153120	161820	242620	194850	0.80742	0.389855	0.799141	1.02864	0.869703	1.13997	1.48984	0.994834	0.925902	0.787788	1.04821	1.04363	1.14004	0.815762	0.960399	1.01497	1.52176	1.22214	mitochondria
LmxM.05.1090	double-strand-break repair protein rad21 homolog, putative OS=Leishmania_mexicana_MHOM/GT/2001/U1103 GN=LmxM.05.1090	LmxM.05.1090	0.538582	0.0345714	Down	61.06	16.7	9	9	9	37070	48073	51256	104720	90864	109420	66802	42708	91998	56628	73086	64212	55610	57747	0	67042	44758	51670	0.565871	0.733831	0.782419	1.59854	1.38703	1.67029	1.01973	0.651935	1.40434	0.864422	1.11565	0.980192	0.848883	0.881504		1.02339	0.683228	0.788739	nucleus	K06670	SCC1, MCD1, RAD21; cohesin complex subunit SCC1
LmxM.25.2360	Pumilio homology domain family member 8 OS=Leishmania_mexicana_MHOM/GT/2001/U1103 GN=LmxM.25.2360	LmxM.25.2360	0.635055	0.0352566	Down	64.76	57.2	27	27	27	237180	234930	236370	482140	468460	505410	260160	251070	264000	337540	342950	347270	283730	316360	304920	264190	292470	266580	0.749551	0.74244	0.746991	1.52369	1.48046	1.59723	0.822174	0.793447	0.834309	1.06671	1.08381	1.09746	0.896661	0.999781	0.963627	0.83491	0.924282	0.842463	nucleus
LmxM.14.0640	fatty acid elongase, putative OS=Leishmania_mexicana_MHOM/GT/2001/U1103 GN=LmxM.14.0640	LmxM.14.0640	0.599055	0.0358185	Down	42.48	20.3	6	6	6	117440	113250	102220	123940	124480	117550	251520	244210	249750	110360	104740	109210	134420	131170	125930	373940	380280	369740	0.643673	0.620709	0.560255	0.679299	0.682259	0.644276	1.37855	1.33848	1.36885	0.604869	0.574066	0.598566	0.736739	0.718926	0.690206	2.04952	2.08427	2.0265	extracellular	K10203	ELOVL6; elongation of very long chain fatty acids protein 6 [EC:2.3.1.199]
LmxM.34.2560	cytochrome P450 reductase, putative OS=Leishmania_mexicana_MHOM/GT/2001/U1103 GN=LmxM.34.2560	LmxM.34.2560	0.474778	0.0359282	Down	90.97	14.3	9	9	9	50704	49868	45934	149700	150910	148390	61816	52639	53701	49664	41637	53377	70572	74344	76461	65999	71272	63489	0.685974	0.674663	0.62144	2.02529	2.04166	2.00757	0.836308	0.712152	0.72652	0.671903	0.563306	0.722136	0.954767	1.0058	1.03444	0.892899	0.964238	0.858942	Golgi apparatus	K00327	POR; NADPH-ferrihemoprotein reductase [EC:1.6.2.4]
LmxM.21.1350	PB1 domain containing protein, putative OS=Leishmania_mexicana_MHOM/GT/2001/U1103 GN=LmxM.21.1350	LmxM.21.1350	0.473108	0.0363326	Down	170.53	26.7	28	28	28	135810	122420	120860	378360	423500	364430	130390	161960	143910	182390	182970	193240	122970	107300	125400	35739	29792	90432	0.80101	0.722035	0.712834	2.23157	2.49781	2.14941	0.769042	0.955243	0.848784	1.07574	1.07916	1.13973	0.725279	0.632857	0.739611	0.210789	0.175714	0.53337	nucleus
LmxM.31.1740	zinc finger protein 2, putative OS=Leishmania_mexicana_MHOM/GT/2001/U1103 GN=LmxM.31.1740	LmxM.31.1740	0.258772	0.0383388	Down	14.553	27.1	2	2	2	232600	185800	111060	1074900	1017200	1089100	246070	437610	227220	322100	410980	322880	501560	362440	365510	0	138850	97689	0.553533	0.44216	0.264296	2.55801	2.42069	2.5918	0.585588	1.04141	0.54073	0.766522	0.978035	0.768378	1.19359	0.862521	0.869827		0.33043	0.232477	extracellular	K05631	AIP3, WWP3, BAIAP1; atrophin-1 interacting protein 3 (BAI1-associated protein 1)
LmxM.17.0280	histone H2A variant Z OS=Leishmania_mexicana_MHOM/GT/2001/U1103 GN=LmxM.17.0280	LmxM.17.0280	0.580366	0.0391406	Down	18.682	18.1	4	4	4	901140	906730	871070	1982500	2121900	2170100	892960	992740	1071700	876140	938150	978100	1223200	1284300	1282500	527620	434140	432890	0.815598	0.820658	0.788383	1.79431	1.92048	1.9641	0.808195	0.898503	0.969968	0.792971	0.849095	0.885253	1.10709	1.16239	1.16076	0.477535	0.392929	0.391797	nucleus	K11251	H2A; histone H2A
LmxM.25.0920	Histone RNA hairpin-binding protein RNA-binding domain containing protein, putative OS=Leishmania_mexicana_MHOM/GT/2001/U1103 GN=LmxM.25.0920	LmxM.25.0920	0.45946	0.0405174	Down	93.05	15.3	10	10	10	20198	23683	29070	64581	90085	79691	25868	29779	27547	41447	40173	43898	28278	24621	26733	0	0	6435.4	0.536746	0.629357	0.772512	1.71619	2.39394	2.11773	0.687422	0.791354	0.73204	1.10142	1.06757	1.16655	0.751466	0.654284	0.710408			0.171016	nucleus	K18710	SLBP; histone RNA hairpin-binding protein
LmxM.30.0520	CCCH zinc finger in TRM13 protein/U11-48K-like CHHC zinc finger/Methyltransferase TRM13, putative OS=Leishmania_mexicana_MHOM/GT/2001/U1103 GN=LmxM.30.0520	LmxM.30.0520	0.641333	0.0442863	Down	60.747	28.5	9	9	9	140500	103170	117580	238820	236950	255950	139240	126640	128960	153800	162560	157270	135760	141430	127830	71663	77595	46015	0.987222	0.724923	0.826175	1.67807	1.66493	1.79843	0.978369	0.889835	0.906137	1.08067	1.14223	1.10506	0.953917	0.993757	0.898197	0.50354	0.545221	0.323324	nucleus	K15446	TRM13, CCDC76; tRNA:m4X modification enzyme [EC:2.1.1.225]
LmxM.09.1480	J-binding protein OS=Leishmania_mexicana_MHOM/GT/2001/U1103 GN=LmxM.09.1480	LmxM.09.1480	0.594647	0.0461847	Down	91.722	25.7	14	14	14	78118	75949	74160	188480	177680	153490	85335	90330	72290	128430	134220	117770	64233	57511	61383	64564	37639	43012	0.824903	0.801999	0.783107	1.99029	1.87625	1.62081	0.901112	0.953858	0.763361	1.35618	1.41732	1.24362	0.678281	0.607299	0.648186	0.681776	0.397457	0.454194	nucleus
LmxM.30.1100	Domain of unknown function (DUF4498), putative OS=Leishmania_mexicana_MHOM/GT/2001/U1103 GN=LmxM.30.1100	LmxM.30.1100	0.427612	0.0480545	Down	41.971	39.1	12	11	12	87797	75907	84201	301750	286730	298490	88533	89913	94069	98658	93201	97043	85181	82743	80900	52732	52851	44966	0.754102	0.651977	0.723216	2.59178	2.46277	2.56378	0.760424	0.772277	0.807974	0.847389	0.800518	0.833518	0.731633	0.710693	0.694863	0.452924	0.453946	0.38622	extracellular
[truncated: 9 more columns]

## Sheet: DAC3 vs Control Upreg PTN
DAC3-/+ Upregulated proteins compared to Cas9 parasites
Protein accession	Protein description	Gene name	Dac1/control Ratio	Dac1/control P value	Regulated Type	MW [kDa]	Coverage [%]	Peptides	Unique peptides	Razor + unique peptides	LFQ intensity Dac1_1	LFQ intensity Dac1_2	LFQ intensity Dac1_3	LFQ intensity WT_1	LFQ intensity WT_2	LFQ intensity WT_3	LFQ intensity Cas9_1	LFQ intensity Cas9_2	LFQ intensity Cas9_3	LFQ intensity Dac3_1	LFQ intensity Dac3_2	LFQ intensity Dac3_3	LFQ intensity Dac4_1	LFQ intensity Dac4_2	LFQ intensity Dac4_3	LFQ intensity Dac5_1	LFQ intensity Dac5_2	LFQ intensity Dac5_3	Dac1_1	Dac1_2	Dac1_3	WT_1	WT_2	WT_3	Cas9_1	Cas9_2	Cas9_3	Dac3_1	Dac3_2	Dac3_3	Dac4_1	Dac4_2	Dac4_3	Dac5_1	Dac5_2	Dac5_3	Subcellular localization	KEGG KO No.	KEGG Gene
LmxM.01.0380	Dyggve-Melchior-Clausen syndrome protein, putative OS=Leishmania_mexicana_MHOM/GT/2001/U1103 GN=LmxM.01.0380	LmxM.01.0380	1.6719	2.93315e-05	Up	88.188	17.4	9	9	9	155160	114160	118830	86645	75619	78611	92843	83681	91447	132750	142570	150050	153350	88296	94473	224040	183620	215210	1.22422	0.900728	0.937574	0.683633	0.596638	0.620245	0.732536	0.660247	0.721521	1.0474	1.12488	1.1839	1.20994	0.69666	0.745396	1.76769	1.44877	1.69802	plasma membrane
LmxM.01.0640	HSP70-like protein OS=Leishmania_mexicana_MHOM/GT/2001/U1103 GN=LmxM.01.0640	LmxM.01.0640	1.85521	0.00513052	Up	118.35	19.2	12	12	12	54959	44306	51250	37279	32027	37366	69812	65321	69078	101570	86757	100050	49481	48102	48482	106850	101180	99967	0.821757	0.662472	0.7663	0.557403	0.478874	0.558704	1.04384	0.976692	1.03287	1.51869	1.29721	1.49597	0.739849	0.71923	0.724912	1.59764	1.51286	1.49473	plasma membrane	K09486	HYOU1; hypoxia up-regulated 1
LmxM.02.0250	hypothetical protein, conserved OS=Leishmania_mexicana_MHOM/GT/2001/U1103 GN=LmxM.02.0250	LmxM.02.0250	1.67458	0.000134598	Up	118.68	6.2	5	5	5	31124	23493	23185	0	16394	17355	17523	0	0	27522	30274	28063	17105	14950	0	33805	27209	34140	1.27355	0.961303	0.9487		0.670821	0.710144	0.717018			1.12616	1.23877	1.1483	0.699914	0.611734		1.38326	1.11336	1.39696	nucleus
LmxM.03.0020	hypothetical protein, conserved OS=Leishmania_mexicana_MHOM/GT/2001/U1103 GN=LmxM.03.0020	LmxM.03.0020	1.57433	0.005094	Up	29.329	18	4	4	4	60502	57518	83372	62339	66718	64237	53313	52141	40517	82250	87363	97445	61561	64035	53221	78090	55361	66588	0.917801	0.872534	1.26473	0.945668	1.0121	0.97446	0.808746	0.790967	0.614633	1.24771	1.32528	1.47822	0.933866	0.971396	0.80735	1.18461	0.839813	1.01012	nucleus
LmxM.03.0030	D-3-phosphoglycerate dehydrogenase-like protein OS=Leishmania_mexicana_MHOM/GT/2001/U1103 GN=LmxM.03.0030	LmxM.03.0030	1.51897	1.87965e-09	Up	43.798	72.5	21	21	21	697140	688280	669060	654540	667900	673370	689740	679770	673610	1027800	1016000	1023700	644160	642470	635170	948750	915920	890980	0.906792	0.895268	0.870268	0.851381	0.868759	0.875874	0.897167	0.884199	0.876186	1.33689	1.32154	1.33156	0.83788	0.835681	0.826186	1.23407	1.19137	1.15893	cytoplasm	K00058	serA, PHGDH; D-3-phosphoglycerate dehydrogenase / 2-oxoglutarate reductase [EC:1.1.1.95 1.1.1.399]
LmxM.03.0090	DNA primase large subunit, putative OS=Leishmania_mexicana_MHOM/GT/2001/U1103 GN=LmxM.03.0090	LmxM.03.0090	1.53895	0.00530643	Up	59.976	29.7	11	11	11	64388	61365	60844	73911	77120	82854	55156	50134	47014	100950	101550	94662	49588	47400	49640	26171	26612	26283	1.05781	1.00815	0.999589	1.21426	1.26698	1.36119	0.906143	0.823638	0.77238	1.65848	1.66834	1.55518	0.814668	0.778722	0.815522	0.429956	0.437201	0.431796	cytoplasm,nucleus	K02685	PRI2; DNA primase large subunit
LmxM.03.0350	hypothetical protein OS=Leishmania_mexicana_MHOM/GT/2001/U1103 GN=LmxM.03.0350	LmxM.03.0350	1.87325	5.95586e-05	Up	147.46	16.4	14	14	14	385350	379780	359410	372450	361400	327730	277730	265770	288880	599440	601290	573200	322070	300650	332630	396690	485360	378240	0.989759	0.975453	0.923133	0.956626	0.928244	0.841764	0.71334	0.682622	0.741979	1.53964	1.54439	1.47225	0.827226	0.77221	0.854349	1.01889	1.24663	0.971497	nucleus	K07298	STK11, LKB1; serine/threonine-protein kinase 11 [EC:2.7.11.1]
LmxM.03.0410	hypothetical protein OS=Leishmania_mexicana_MHOM/GT/2001/U1103 GN=LmxM.03.0410	LmxM.03.0410	2.30344	0.0417539	Up	71.755	21.2	8	8	8	91615	115010	91946	187590	207180	352490	128390	51098	101990	416370	436030	332420	93653	49930	94766	148240	86463	86847	0.536802	0.673881	0.538741	1.09915	1.21393	2.06535	0.752278	0.2994	0.597592	2.43965	2.55484	1.94776	0.548743	0.292556	0.555264	0.868586	0.506615	0.508865	plasma membrane	K08220	FLVCR, SLC49A1_2; MFS transporter, FLVCR family, feline leukemia virus subgroup C receptor-related protein
LmxM.03.0430	60S acidic ribosomal protein P2, putative OS=Leishmania_mexicana_MHOM/GT/2001/U1103 GN=LmxM.03.0430	LmxM.03.0430	1.52963	9.68244e-10	Up	9.7078	95.9	8	2	8	11066000	12095000	11598000	8154200	8000000	8067900	8076200	8008800	8328300	12292000	12556000	12349000	8832700	8647400	8735400	7732000	7763900	8030800	1.1694	1.27814	1.22562	0.861695	0.8454	0.852575	0.853452	0.84633	0.880093	1.29896	1.32686	1.30498	0.933395	0.913814	0.923113	0.817079	0.82045	0.848655	cytoplasm,nucleus
LmxM.03.0450	TLD domain protein, conserved OS=Leishmania_mexicana_MHOM/GT/2001/U1103 GN=LmxM.03.0450	LmxM.03.0450	1.54556	0.000198487	Up	166.13	21	19	19	19	86136	74905	74543	68260	62152	68156	80688	84107	83789	118740	115510	111300	87706	88084	89901	117020	120400	108780	0.945293	0.822039	0.818067	0.749114	0.682082	0.747973	0.885504	0.923026	0.919536	1.3031	1.26766	1.22145	0.962523	0.966671	0.986612	1.28423	1.32132	1.1938	plasma membrane
LmxM.03.0520	hypothetical protein, conserved OS=Leishmania_mexicana_MHOM/GT/2001/U1103 GN=LmxM.03.0520	LmxM.03.0520	1.71378	0.00833526	Up	90.946	35.3	22	22	22	1230500	1158800	1088600	584510	685030	579090	1127600	1218600	1053100	1543100	1487000	1466800	1022200	953980	909990	2253600	2746900	2404100	0.94197	0.887082	0.833343	0.447453	0.524403	0.443304	0.863198	0.93286	0.806167	1.18127	1.13832	1.12286	0.782512	0.730289	0.696613	1.72517	2.1028	1.84038	nucleus	K08877	UHMK1, KIS; serine/threonine-protein kinase Kist [EC:2.7.11.1]
LmxM.03.0690	DEAD/DEAH box helicase, putative OS=Leishmania_mexicana_MHOM/GT/2001/U1103 GN=LmxM.03.0690	LmxM.03.0690	1.73937	1.90567e-06	Up	230.86	58.2	96	96	96	1047200	1031000	1042200	761370	748030	765010	862990	857850	859370	1402300	1430700	1389000	898380	897830	875870	1455400	1441400	1422800	0.982328	0.967132	0.977638	0.714205	0.701691	0.717619	0.80953	0.804708	0.806134	1.31543	1.34207	1.30295	0.842727	0.842211	0.821612	1.36524	1.35211	1.33466	cytoplasm	K20103	DDX60; ATP-dependent RNA helicase DDX60 [EC:3.6.4.13]
LmxM.03.0700	hypothetical protein, conserved OS=Leishmania_mexicana_MHOM/GT/2001/U1103 GN=LmxM.03.0700	LmxM.03.0700	2.06549	0.00102555	Up	296.39	3.1	6	6	6	46368	43093	43288	20985	0	27163	28307	32225	32351	68140	50644	55995	34168	26288	34256	39092	0	35314	1.20109	1.11626	1.12131	0.543585		0.703617	0.733251	0.83474	0.838004	1.76506	1.31186	1.45047	0.885071	0.680951	0.887351	1.01262		0.914756	plasma membrane
LmxM.03.0710	Aminoacyl-tRNA editing domain containing protein, putative OS=Leishmania_mexicana_MHOM/GT/2001/U1103 GN=LmxM.03.0710	LmxM.03.0710	2.14432	0.044589	Up	26.683	31	5	5	5	497840	0	0	306060	110670	427340	512240	503520	490630	894810	867420	757840	385970	301930	447040	599170	653780	740380	0.937481			0.576341	0.208402	0.804723	0.964598	0.948177	0.923904	1.68501	1.63344	1.42709	0.726819	0.568564	0.84182	1.1283	1.23113	1.39421	cytoplasm
LmxM.03.0750	TatD related DNase, putative OS=Leishmania_mexicana_MHOM/GT/2001/U1103 GN=LmxM.03.0750	LmxM.03.0750	1.54734	8.21394e-05	Up	73.354	39.9	15	15	15	215580	222240	223360	221240	222680	206800	267300	255280	252810	362140	367290	373910	226900	226630	231340	279400	272720	290680	0.822423	0.847831	0.852104	0.844016	0.849509	0.788928	1.01973	0.973876	0.964453	1.38154	1.40119	1.42644	0.865608	0.864578	0.882547	1.06589	1.04041	1.10892	nucleus
LmxM.03.0770	Ubiquitin-like domain containing protein, putative OS=Leishmania_mexicana_MHOM/GT/2001/U1103 GN=LmxM.03.0770	LmxM.03.0770	1.70377	5.05345e-12	Up	58.138	55.6	24	24	24	473490	448990	451460	455040	455250	453380	453600	446310	446850	771270	764480	773220	458960	451560	464640	403580	414340	418800	0.946431	0.897459	0.902397	0.909552	0.909972	0.906234	0.906674	0.892103	0.893182	1.54165	1.52807	1.54554	0.917388	0.902596	0.928741	0.806692	0.8282	0.837114	nucleus	K21768	TBCE; tubulin-specific chaperone E
LmxM.03.0780	serine/threonine-protein kinase, putative OS=Leishmania_mexicana_MHOM/GT/2001/U1103 GN=LmxM.03.0780	LmxM.03.0780	1.56512	0.0428016	Up	316.22	7.5	13	13	13	29066	34936	54314	24868	31634	24754	43425	41791	48141	43973	59984	63991	39280	36311	43731	45111	55407	68605	0.662832	0.796694	1.2386	0.567099	0.721394	0.5645	0.99028	0.953018	1.09783	1.00278	1.3679	1.45928	0.895756	0.82805	0.997258	1.02873	1.26352	1.56449	nucleus	K13302	SGK1; serum/glucocorticoid-regulated kinase 1 [EC:2.7.11.1]
LmxM.03.0800	6-phosphofructo-2-kinase 1 OS=Leishmania_mexicana_MHOM/GT/2001/U1103 GN=LmxM.03.0800	LmxM.03.0800	1.85987	3.22389e-05	Up	253.3	8.5	14	14	14	35421	32777	18400	36289	35480	28497	31567	28463	28989	59266	57376	59381	26704	25736	28477	27956	21781	22763	1.05329	0.974663	0.547146	1.0791	1.05504	0.847392	0.938682	0.846381	0.862022	1.76235	1.70614	1.76576	0.794075	0.765291	0.846797	0.831305	0.647684	0.676885	cytoplasm	K01103	PFKFB3; 6-phosphofructo-2-kinase / fructose-2,6-biphosphatase 3 [EC:2.7.1.105 3.1.3.46]
LmxM.03.0830	hypothetical protein, conserved OS=Leishmania_mexicana_MHOM/GT/2001/U1103 GN=LmxM.03.0830	LmxM.03.0830	1.71719	4.06398e-05	Up	39.516	11.1	4	4	4	0	0	0	15951	14196	15933	15159	13110	0	26055	25734	24814	11286	0	12502	15144	14682	14611				0.946098	0.842004	0.945031	0.899123	0.777591		1.54539	1.52636	1.47179	0.669404		0.741529	0.898233	0.87083	0.866619	nucleus
LmxM.03.0840	hypothetical protein, conserved OS=Leishmania_mexicana_MHOM/GT/2001/U1103 GN=LmxM.03.0840	LmxM.03.0840	1.613	0.00200118	Up	103.7	42.8	26	26	26	199300	190020	186250	246590	239660	236120	158070	163890	164410	340080	317100	317670	169510	160850	168070	217700	209070	209770	0.921233	0.878337	0.860911	1.13982	1.10779	1.09143	0.730654	0.757556	0.759959	1.57197	1.46574	1.46838	0.783533	0.743504	0.776877	1.00628	0.966393	0.969629	nucleus
LmxM.03.0870	hypothetical protein, conserved OS=Leishmania_mexicana_MHOM/GT/2001/U1103 GN=LmxM.03.0870	LmxM.03.0870	1.52963	0.00819313	Up	139.32	6.8	6	6	6	33789	28838	33822	49850	46279	47343	31995	27340	29246	61183	55493	60802	28841	31707	29774	14812	0	0	0.884653	0.755028	0.885517	1.30516	1.21166	1.23952	0.837683	0.715808	0.76571	1.60187	1.4529	1.5919	0.755106	0.830143	0.779534	0.387803			nucleus
LmxM.03.0890	NLI interacting factor-like phosphatase, putative OS=Leishmania_mexicana_MHOM/GT/2001/U1103 GN=LmxM.03.0890	LmxM.03.0890	1.96378	0.0207967	Up	67.22	20.4	8	8	8	42908	47802	45204	32563	27757	26548	84626	82331	91703	110200	118420	110650	70103	75450	72279	89396	86955	70108	0.601045	0.669598	0.633206	0.456134	0.388813	0.371878	1.18542	1.15327	1.28455	1.54365	1.6588	1.54996	0.981985	1.05688	1.01247	1.25224	1.21804	0.982055	cytoplasm	K17616	CTDSPL2; CTD small phosphatase-like protein 2 [EC:3.1.3.-]
LmxM.03.0910	inorganic pyrophosphatase, putative OS=Leishmania_mexicana_MHOM/GT/2001/U1103 GN=LmxM.03.0910	LmxM.03.0910	1.62701	6.89591e-05	Up	28.909	75.7	15	15	15	473430	467620	570570	484650	434930	469630	571290	562020	552400	832770	816640	852050	506850	536570	519280	780590	759590	784350	0.776452	0.766923	0.935767	0.794854	0.71331	0.77022	0.936948	0.921745	0.905967	1.36579	1.33934	1.39741	0.831263	0.880005	0.851649	1.28021	1.24577	1.28638	mitochondria	K01507	ppa; inorganic pyrophosphatase [EC:3.6.1.1]
LmxM.03.0980	eukaryotic translation initiation factor 2 subunit alpha OS=Leishmania_mexicana_MHOM/GT/2001/U1103 GN=LmxM.03.0980	LmxM.03.0980	1.81969	0.000614032	Up	46.623	67.8	24	24	24	461560	480540	474280	439360	442020	443570	624670	644130	630760	974030	977870	981910	451590	444140	445840	964350	1011300	978240	0.699913	0.728694	0.719202	0.666249	0.670282	0.672633	0.947254	0.976764	0.956489	1.47703	1.48285	1.48898	0.684794	0.673497	0.676075	1.46235	1.53354	1.48341	cytoplasm	K03237	EIF2S1; translation initiation factor 2 subunit 1
LmxM.04.0060	DNA topoisomerase type IB small subunit, putative OS=Leishmania_mexicana_MHOM/GT/2001/U1103 GN=LmxM.04.0060	LmxM.04.0060	1.71188	0.0281199	Up	28.131	30.2	7	7	7	108270	116290	126860	56738	50133	56321	135650	141180	139820	161920	167200	167190	100460	105380	115660	295800	287280	281100	0.74576	0.801002	0.873808	0.39081	0.345315	0.387937	0.934353	0.972444	0.963076	1.1153	1.15167	1.1516	0.691965	0.725854	0.796663	2.03746	1.97878	1.93621	nucleus	K03163	TOP1; DNA topoisomerase I [EC:5.6.2.1]
LmxM.04.0350	hypothetical protein OS=Leishmania_mexicana_MHOM/GT/2001/U1103 GN=LmxM.04.0350	LmxM.04.0350	1.50024	0.00103205	Up	227.09	4.6	7	7	7	99444	118460	102140	89587	83726	82886	68916	59386	69481	111000	116050	113490	115900	111410	110590	124600	141730	130630	0.967864	1.15294	0.994103	0.871928	0.814884	0.806709	0.670742	0.577989	0.676241	1.08034	1.12949	1.10457	1.12803	1.08433	1.07634	1.2127	1.37942	1.27139	nucleus
LmxM.04.0890	hypothetical protein, conserved OS=Leishmania_mexicana_MHOM/GT/2001/U1103 GN=LmxM.04.0890	LmxM.04.0890	1.68654	0.0188915	Up	136.32	15.8	15	15	15	93505	87107	80295	29109	29655	41762	73084	64335	72008	90703	89111	81560	81473	79573	100320	165000	153190	142470	1.08289	1.00879	0.929902	0.337113	0.343437	0.483649	0.846391	0.745068	0.83393	1.05044	1.032	0.944552	0.943545	0.921541	1.16181	1.91088	1.7741	1.64996	mitochondria
LmxM.04.0990	hypothetical protein, conserved OS=Leishmania_mexicana_MHOM/GT/2001/U1103 GN=LmxM.04.0990	LmxM.04.0990	3.70114	0.000328089	Up	31.795	26.7	6	6	6	411990	408990	410680	80954	80845	78418	176300	166160	137490	447330	441500	443890	234420	181410	183810	343920	355680	345710	1.50438	1.49342	1.49959	0.295603	0.295205	0.286342	0.643757	0.606731	0.502043	1.63342	1.61213	1.62086	0.855982	0.662416	0.67118	1.25582	1.29876	1.26236	nucleus
LmxM.05.0090	Nudix hydrolase 2, putative OS=Leishmania_mexicana_MHOM/GT/2001/U1103 GN=LmxM.05.0090	LmxM.05.0090	1.62628	0.0139714	Up	20.439	47.5	8	8	8	191720	216700	206270	98541	94475	89333	175620	182320	182730	221730	229520	217980	219950	215390	226390	300670	319020	302540	0.934992	1.05682	1.00595	0.480571	0.460741	0.435665	0.856474	0.889149	0.891149	1.08135	1.11934	1.06306	1.07267	1.05043	1.10407	1.46633	1.55582	1.47545	cytoplasm
LmxM.05.0100	phosphoprotein phosphatase, putative OS=Leishmania_mexicana_MHOM/GT/2001/U1103 GN=LmxM.05.0100	LmxM.05.0100	1.53153	2.72397e-06	Up	71.845	59.2	33	33	33	2722900	2677800	2653300	1850300	1776100	1813300	1983100	1974500	1960500	2976600	2927800	2793000	2873800	2789700	2819100	2964200	2956700	2911100	1.079	1.06113	1.05142	0.733215	0.703812	0.718553	0.785839	0.782431	0.776883	1.17953	1.16019	1.10678	1.1388	1.10547	1.11712	1.17462	1.17165	1.15358	nucleus	K06269	PPP1C; serine/threonine-protein phosphatase PP1 catalytic subunit [EC:3.1.3.16]
LmxM.05.0130	protein kinase, putative OS=Leishmania_mexicana_MHOM/GT/2001/U1103 GN=LmxM.05.0130	LmxM.05.0130	1.51901	0.0222598	Up	47.859	25.7	8	7	8	4260900	3047600	3444200	2782200	3918300	2307900	2431900	2562800	0	3547600	4599300	4615600	3306500	3903100	3689600	1830300	1974000	2071000	1.33416	0.954255	1.07844	0.871154	1.22689	0.722643	0.761469	0.802456		1.11081	1.44012	1.44522	1.03532	1.22213	1.15528	0.573098	0.618093	0.648465	nucleus	K08813	STK33; serine/threonine kinase 33 [EC:2.7.11.1]
LmxM.05.0200	50S ribosome-binding GTPase, putative OS=Leishmania_mexicana_MHOM/GT/2001/U1103 GN=LmxM.05.0200	LmxM.05.0200	2.52933	0.000202557	Up	88.57	15.5	10	10	10	267890	311130	241700	86597	95275	80278	137900	146180	140830	305160	291010	272730	219850	197900	202800	200720	179630	198400	1.34845	1.5661	1.21662	0.435893	0.479575	0.404086	0.694131	0.735809	0.70888	1.53605	1.46482	1.37281	1.10663	0.996147	1.02081	1.01034	0.904183	0.998663	nucleus	K14539	LSG1; large subunit GTPase 1 [EC:3.6.1.-]
LmxM.05.0270	hypothetical protein, conserved OS=Leishmania_mexicana_MHOM/GT/2001/U1103 GN=LmxM.05.0270	LmxM.05.0270	1.79848	9.75768e-05	Up	35.008	36.3	6	5	6	451720	439820	405350	243540	249040	226700	293770	304380	318730	481620	500570	489110	508710	493660	500130	362910	393780	406870	1.15	1.1197	1.03195	0.620009	0.634011	0.577138	0.747886	0.774897	0.81143	1.22612	1.27436	1.24519	1.29508	1.25677	1.27324	0.923904	1.00249	1.03582	nucleus
LmxM.05.0310	glutaredoxin-like protein OS=Leishmania_mexicana_MHOM/GT/2001/U1103 GN=LmxM.05.0310	LmxM.05.0310	1.56712	3.99975e-06	Up	19.71	43.9	6	6	6	315290	312530	301940	187320	190890	183760	205830	209090	183390	298130	308690	302330	292290	289910	283260	322060	309580	328660	1.17622	1.16593	1.12642	0.698818	0.712136	0.685537	0.767871	0.780033	0.684156	1.11221	1.1516	1.12787	1.09042	1.08154	1.05673	1.20148	1.15492	1.2261	mitochondria	K07390	grxD, GLRX5; monothiol glutaredoxin
LmxM.05.0530	kinetoplast-associated protein-like protein OS=Leishmania_mexicana_MHOM/GT/2001/U1103 GN=LmxM.05.0530	LmxM.05.0530	1.67205	0.000635653	Up	213.24	15.5	20	20	20	86718	92646	95733	78725	67608	60440	55426	62332	59112	95785	102450	122500	99953	98488	98311	97011	90778	81805	1.00977	1.0788	1.11474	0.916697	0.787248	0.703781	0.645397	0.725812	0.688318	1.11535	1.19296	1.42643	1.16388	1.14682	1.14476	1.12962	1.05705	0.952562	nucleus
LmxM.05.0590	ATP-dependent RNA helicase, putative OS=Leishmania_mexicana_MHOM/GT/2001/U1103 GN=LmxM.05.0590	LmxM.05.0590	1.94202	0.000680806	Up	105.27	30.7	16	16	16	364700	347890	369060	185380	173020	186710	270860	255490	289620	440760	436530	444330	374000	354990	366170	449880	486340	504050	1.04204	0.994006	1.05449	0.529676	0.49436	0.533476	0.773913	0.729997	0.827515	1.25936	1.24727	1.26956	1.06861	1.01429	1.04624	1.28542	1.38959	1.44019	nucleus	K12858	DDX23, PRP28; ATP-dependent RNA helicase DDX23/PRP28 [EC:3.6.4.13]
LmxM.05.0750	Flavodoxin/Radical SAM superfamily/Wyosine base formation, putative OS=Leishmania_mexicana_MHOM/GT/2001/U1103 GN=LmxM.05.0750	LmxM.05.0750	1.76302	7.83396e-05	Up	88.694	27.9	16	16	16	214060	218490	221480	141310	139930	144250	180820	183200	168800	280130	286420	278210	204420	192680	192460	267500	240630	249860	1.01273	1.03369	1.04783	0.668545	0.662016	0.682454	0.855469	0.866729	0.798602	1.32531	1.35507	1.31623	0.967122	0.911579	0.910538	1.26556	1.13843	1.1821	extracellular	K15449	TYW1; tRNA wybutosine-synthesizing protein 1 [EC:4.1.3.44]
LmxM.05.0760	kinesin-like protein OS=Leishmania_mexicana_MHOM/GT/2001/U1103 GN=LmxM.05.0760	LmxM.05.0760	2.18841	0.00178602	Up	153.51	19.9	22	22	22	311320	299130	313540	83383	80648	76513	157170	141960	158540	271910	240360	251720	323280	314820	320040	545990	576480	574140	1.11165	1.06812	1.11958	0.297741	0.287975	0.27321	0.561216	0.506905	0.566108	0.970925	0.858268	0.898832	1.15436	1.12415	1.14279	1.9496	2.05847	2.05012	nucleus	K20198	KIF17; kinesin family member 17
LmxM.05.0820	hypothetical protein, conserved OS=Leishmania_mexicana_MHOM/GT/2001/U1103 GN=LmxM.05.0820	LmxM.05.0820	1.66892	2.49701e-06	Up	100.18	58.2	37	37	37	511500	512700	508460	359660	358960	346940	315650	316270	328910	569090	561800	560050	526820	531990	523180	384150	386610	398130	1.15075	1.15345	1.14391	0.809147	0.807572	0.78053	0.710135	0.71153	0.739967	1.28031	1.26391	1.25998	1.18522	1.19685	1.17703	0.864244	0.869778	0.895695	nucleus
LmxM.05.0830	methylthioadenosine phosphorylase, putative OS=Leishmania_mexicana_MHOM/GT/2001/U1103 GN=LmxM.05.0830	LmxM.05.0830	1.60536	2.61924e-07	Up	33.35	72.9	16	15	16	2651800	2640900	2625400	1888600	1870600	1838300	1745200	1741600	1777700	2919100	2906900	2892700	2957100	2919400	2874700	2798700	2872600	2882800	1.06536	1.06098	1.05475	0.758743	0.751512	0.738535	0.701132	0.699686	0.714189	1.17275	1.16784	1.16214	1.18801	1.17287	1.15491	1.12437	1.15406	1.15816	cytoplasm	K00772	mtaP, MTAP; 5'-methylthioadenosine phosphorylase [EC:2.4.2.28]
LmxM.05.0880	hypothetical protein, conserved OS=Leishmania_mexicana_MHOM/GT/2001/U1103 GN=LmxM.05.0880	LmxM.05.0880	1.59629	0.00164055	Up	22.13	55.2	8	8	8	268680	264600	256970	171410	155840	137720	179680	212200	202430	283060	281060	281340	234760	245130	234500	210720	201210	212690	1.19887	1.18066	1.14662	0.764844	0.695369	0.614517	0.801745	0.946852	0.903257	1.26303	1.25411	1.25536	1.04752	1.09379	1.04636	0.940248	0.897814	0.949038	mitochondria
LmxM.05.0890	CPSF A subunit region, putative OS=Leishmania_mexicana_MHOM/GT/2001/U1103 GN=LmxM.05.0890	LmxM.05.0890	2.09433	0.0027821	Up	208.66	41	48	48	48	520160	526610	517040	207300	194040	201510	384360	382980	386060	603460	608940	626680	438800	434460	436620	660390	642180	642790	1.11272	1.12652	1.10605	0.443455	0.415089	0.431069	0.822221	0.819269	0.825858	1.29092	1.30264	1.34059	0.938679	0.929395	0.934015	1.4127	1.37375	1.37505	plasma membrane
LmxM.05.0930	ubiquitin-conjugating enzyme E2, putative OS=Leishmania_mexicana_MHOM/GT/2001/U1103 GN=LmxM.05.0930	LmxM.05.0930	1.88987	5.39037e-06	Up	48.814	16.8	5	5	5	0	51638	77872	0	45061	0	41896	43372	43960	77488	83766	85784	49454	48480	41134	61343	31207	86414		0.891469	1.34437		0.777925		0.723285	0.748766	0.758918	1.33774	1.44612	1.48096	0.853765	0.83695	0.71013	1.05901	0.538752	1.49184	cytoplasm	K10578	UBE2J1, NCUBE1, UBC6; ubiquitin-conjugating enzyme E2 J1 [EC:2.3.2.23]
LmxM.05.0950	glutaminyl cyclase, putative OS=Leishmania_mexicana_MHOM/GT/2001/U1103 GN=LmxM.05.0950	LmxM.05.0950	1.72217	0.00541779	Up	102.05	25.6	15	15	15	62707	73549	70492	56137	59010	65029	46040	35813	40715	94315	86157	80216	84092	80508	80497	63114	61892	53872	0.945209	1.10863	1.06256	0.846177	0.889483	0.980209	0.69398	0.539824	0.613714	1.42165	1.29868	1.20913	1.26755	1.21353	1.21337	0.951344	0.932924	0.812035	nucleus	K00683	QPCT; glutaminyl-peptide cyclotransferase [EC:2.3.2.5]
LmxM.05.1160	hypothetical protein, unknown function OS=Leishmania_mexicana_MHOM/GT/2001/U1103 GN=LmxM.05.1160	LmxM.05.1160	2.06667	0.000155619	Up	88.712	10.9	7	7	7	91498	76449	81944	59616	56296	49093	36736	37966	44670	102550	95542	95765	80764	78725	76660	54976	59119	59960	1.32999	1.11124	1.19111	0.866561	0.818303	0.713602	0.533984	0.551863	0.64931	1.49064	1.38877	1.39201	1.17396	1.14432	1.11431	0.799116	0.859337	0.871562	nucleus
LmxM.05.1210	protein phosphatase type 1 regulator-like protein OS=Leishmania_mexicana_MHOM/GT/2001/U1103 GN=LmxM.05.1210	LmxM.05.1210	1.62546	1.43838e-06	Up	44.82	60.4	24	24	24	721730	700090	729840	447810	426320	480200	424630	423640	427220	687480	737320	712540	692690	713720	699610	656530	610820	655640	1.18664	1.15106	1.19997	0.736272	0.700939	0.789526	0.69816	0.696533	0.702419	1.13033	1.21227	1.17153	1.13889	1.17347	1.15027	1.07944	1.00429	1.07798	cytoplasm	K17550	PPP1R7, SDS22; protein phosphatase 1 regulatory subunit 7
LmxM.06.0390	hypothetical protein, conserved OS=Leishmania_mexicana_MHOM/GT/2001/U1103 GN=LmxM.06.0390	LmxM.06.0390	2.01455	3.55721e-05	Up	98.066	18.6	11	11	11	68898	81929	59324	46022	39775	47561	44096	58200	46866	92963	92128	99485	62723	58853	57849	112640	107590	108050	0.965144	1.14769	0.831029	0.64469	0.55718	0.666249	0.61771	0.815283	0.656513	1.30225	1.29056	1.39362	0.878643	0.824431	0.810366	1.5779	1.50715	1.5136	nucleus
LmxM.06.0550	hypothetical protein, conserved OS=Leishmania_mexicana_MHOM/GT/2001/U1103 GN=LmxM.06.0550	LmxM.06.0550	1.60925	0.00909402	Up	180.49	10.4	12	12	12	129720	83335	100560	53516	77823	58900	77930	73658	99647	115620	108030	131570	83884	86049	85396	66528	65485	54082	1.50474	0.96668	1.16649	0.620782	0.902742	0.683236	0.903983	0.854428	1.1559	1.34118	1.25314	1.5262	0.973049	0.998163	0.990588	0.77172	0.759622	0.627348	plasma membrane
LmxM.07.0080	Golgi/lysosome glycoprotein 1, putative OS=Leishmania_mexicana_MHOM/GT/2001/U1103 GN=LmxM.07.0080	LmxM.07.0080	1.81953	0.02578	Up	68.919	24.9	11	11	11	220430	223790	228660	91040	90152	87511	257250	252950	247770	314650	310100	309280	183600	184860	188910	458910	434040	434460	0.878137	0.891522	0.910923	0.36268	0.359142	0.348621	1.02482	1.00769	0.987052	1.25348	1.23536	1.23209	0.731415	0.736435	0.752569	1.82818	1.7291	1.73078	extracellular,plasma membrane
LmxM.07.0280	HECT E3 ligase, putative OS=Leishmania_mexicana_MHOM/GT/2001/U1103 GN=LmxM.07.0280	LmxM.07.0280	1.51421	1.39283e-07	Up	666.18	25	97	97	97	1231400	1141200	1175200	854100	843210	805810	842570	786290	788460	1255800	1232000	1237500	1083200	1043100	1045400	1669800	1659800	1641000	1.08996	1.01012	1.04021	0.755995	0.746356	0.713252	0.74579	0.695974	0.697895	1.11155	1.09049	1.09536	0.95878	0.923286	0.925322	1.478	1.46915	1.45251	cytoplasm	K12166	HACE1; E3 ubiquitin-protein ligase HACE1 [EC:2.3.2.26]
LmxM.07.0360	Protein of unknown function (DUF1674), putative OS=Leishmania_mexicana_MHOM/GT/2001/U1103 GN=LmxM.07.0360	LmxM.07.0360	1.97837	0.0105058	Up	11.997	45.8	4	4	4	1113900	1226200	1222200	446980	367280	278640	834920	858370	803120	1113100	1313900	1123500	923400	380630	376350	840810	946020	899650	1.33056	1.46471	1.45993	0.533921	0.438719	0.332838	0.997318	1.02533	0.959333	1.32961	1.56946	1.34203	1.10301	0.454665	0.449553	1.00435	1.13003	1.07464	cytoplasm
LmxM.07.0700	topoisomerase-related function protein-like protein OS=Leishmania_mexicana_MHOM/GT/2001/U1103 GN=LmxM.07.0700	LmxM.07.0700	1.56997	0.00410215	Up	98.3	26.3	20	20	20	224940	205710	199260	151290	143880	126520	206110	209090	225220	267280	287250	279210	231950	225740	236260	364850	287930	317880	0.966244	0.88364	0.855934	0.649876	0.618046	0.543475	0.885359	0.898159	0.967447	1.14812	1.2339	1.19936	0.996356	0.96968	1.01487	1.56724	1.23682	1.36547	mitochondria	K03514	PAPD5_7, TRF4; non-canonical poly(A) RNA polymerase PAPD5/7 [EC:2.7.7.19]
LmxM.07.0720	hypothetical protein, conserved OS=Leishmania_mexicana_MHOM/GT/2001/U1103 GN=LmxM.07.0720	LmxM.07.0720	1.51864	0.00696627	Up	135.39	29.8	26	25	26	188820	190940	190180	119150	107430	113460	178100	179020	174910	219720	225420	217040	182020	173560	177580	261890	259100	266610	0.992353	1.00349	0.999501	0.626199	0.564604	0.596295	0.936014	0.940849	0.919248	1.15475	1.18471	1.14066	0.956615	0.912153	0.933281	1.37638	1.36171	1.40118	mitochondria	K20221	IPO4, RANBP4; importin-4
LmxM.07.0860	hypothetical protein, unknown function OS=Leishmania_mexicana_MHOM/GT/2001/U1103 GN=LmxM.07.0860	LmxM.07.0860	1.72912	8.51463e-05	Up	149.07	12.7	10	9	10	608650	689610	826240	403620	413910	386350	483540	491690	392970	753120	688420	782180	554160	628660	656690	384230	484360	269060	1.10692	1.25416	1.50264	0.734043	0.752757	0.702635	0.879389	0.894211	0.714674	1.36966	1.25199	1.42251	1.00782	1.14331	1.19429	0.698779	0.880881	0.489326	mitochondria,nucleus
LmxM.07.0870	splicing factor ptsr1-like protein OS=Leishmania_mexicana_MHOM/GT/2001/U1103 GN=LmxM.07.0870	LmxM.07.0870	2.00232	0.0186738	Up	41.683	39.8	15	15	15	1792300	1925400	1831500	606930	564370	592920	1731000	1712800	1849500	2274900	2544000	2246800	1568900	1599100	1451400	7643100	7074300	6815700	0.704014	0.756296	0.719412	0.238402	0.221684	0.232899	0.679936	0.672787	0.726482	0.893579	0.999282	0.882542	0.616263	0.628125	0.570109	3.0022	2.77878	2.6772	nucleus
LmxM.07.0990	nucleolar RNA-binding protein, putative OS=Leishmania_mexicana_MHOM/GT/2001/U1103 GN=LmxM.07.0990	LmxM.07.0990	3.65939	3.95962e-05	Up	36.271	16.4	5	5	5	1395200	1501300	1372800	390070	346780	393970	610190	639500	643820	1885200	1939500	1708900	968290	972420	916600	1426600	1521100	1580200	1.24248	1.33697	1.22253	0.347373	0.308822	0.350846	0.543399	0.569501	0.573348	1.67885	1.7272	1.52184	0.862302	0.86598	0.81627	1.27045	1.3546	1.40723	cytoplasm,nucleus
LmxM.07.1150	N-terminal region of Chorein, a TM vesicle-mediated sorter, putative OS=Leishmania_mexicana_MHOM/GT/2001/U1103 GN=LmxM.07.1150	LmxM.07.1150	1.51736	0.00203241	Up	275.84	29.2	58	58	58	655220	634650	619630	385610	389070	368360	523360	531460	532590	683710	688280	699550	557950	547620	547660	926960	954200	958460	1.05262	1.01958	0.995448	0.61949	0.625049	0.591778	0.840788	0.853801	0.855617	1.09839	1.10574	1.12384	0.896358	0.879763	0.879827	1.48918	1.53294	1.53979	extracellular
LmxM.08.0390	hypothetical protein, conserved OS=Leishmania_mexicana_MHOM/GT/2001/U1103 GN=LmxM.08.0390	LmxM.08.0390	1.66864	0.00451665	Up	191.89	2.2	3	3	3	48719	52854	58390	38801	35300	37413	35417	36716	36551	41888	68154	73674	45444	40713	41925	30086	36844	28283	1.11404	1.20859	1.33518	0.88725	0.807193	0.855511	0.809869	0.839573	0.8358	0.957839	1.55845	1.68468	1.03915	0.930971	0.958685	0.687967	0.842499	0.646738	cytoplasm
LmxM.08.0550	translation initiation factor-like protein OS=Leishmania_mexicana_MHOM/GT/2001/U1103 GN=LmxM.08.0550	LmxM.08.0550	1.90629	0.00168931	Up	38.006	28.5	11	11	11	1041400	1003400	995400	455290	450090	460610	777350	747130	728190	1180300	1141100	1127700	725860	725690	726610	1418600	1450500	1503900	1.12522	1.08416	1.07552	0.491936	0.486317	0.497684	0.839918	0.807266	0.786801	1.2753	1.23295	1.21847	0.784284	0.7841	0.785094	1.53278	1.56725	1.62495	nucleus
LmxM.08_29.0020	transcription factor-like protein OS=Leishmania_mexicana_MHOM/GT/2001/U1103 GN=LmxM.08_29.0020	LmxM.08_29.0020	1.7238	0.000228361	Up	114.94	48.9	41	41	41	357560	351420	345400	198360	199900	206080	259020	268000	262260	402820	394920	403420	244910	244270	242570	535080	532710	549120	1.07307	1.05464	1.03658	0.595296	0.599918	0.618465	0.777342	0.804292	0.787066	1.2089	1.18519	1.2107	0.734997	0.733076	0.727974	1.60582	1.59871	1.64796	mitochondria	K25639	SUPT16H, SPT16; FACT complex subunit SPT16
LmxM.08_29.0620	ABC transporter, putative OS=Leishmania_mexicana_MHOM/GT/2001/U1103 GN=LmxM.08_29.0620	LmxM.08_29.0620	2.31716	2.72192e-06	Up	206.85	27.5	41	41	41	537470	538430	546380	474710	493830	488920	415730	410930	408050	1042800	1031800	1044500	463930	474350	478460	1388100	1401600	1345100	0.745044	0.746374	0.757395	0.658045	0.68455	0.677743	0.576287	0.569633	0.565641	1.44553	1.43029	1.44789	0.643102	0.657546	0.663244	1.92419	1.94291	1.86458	plasma membrane	K05641	ABCA1; ATP-binding cassette, subfamily A (ABC1), member 1
LmxM.08_29.0868	cytochrome b5-like Heme/Steroid binding domain containing protein, putative OS=Leishmania_mexicana_MHOM/GT/2001/U1103 GN=LmxM.08_29.0868	LmxM.08_29.0868	1.96799	0.00149234	Up	18.792	50.6	4	4	4	54404	61861	54179	23778	21805	27693	37098	29052	0	53289	59304	52040	73139	60244	52035	56318	51675	60842	1.11597	1.26893	1.11136	0.48775	0.447279	0.568057	0.760979	0.595934		1.0931	1.21648	1.06748	1.50028	1.23577	1.06738	1.15523	1.05999	1.24803	cytoplasm,nucleus	K19703	FA2H, SCS7; 4-hydroxysphinganine ceramide fatty acyl 2-hydroxylase [EC:1.14.18.6]
LmxM.08_29.1390	RNA binding protein, putative OS=Leishmania_mexicana_MHOM/GT/2001/U1103 GN=LmxM.08_29.1390	LmxM.08_29.1390	1.52687	0.000895555	Up	83.846	19.1	8	8	8	252680	246810	270010	147370	128460	153610	170750	160350	183810	244310	252480	224160	262110	252500	298510	229300	233100	168800	1.17249	1.14525	1.25291	0.68383	0.596084	0.712785	0.792319	0.744061	0.85292	1.13365	1.17156	1.04015	1.21625	1.17166	1.38515	1.064	1.08164	0.78327	nucleus	K13208	ELAVL2_3_4; ELAV like protein 2/3/4
LmxM.08_29.2130	hypothetical protein, conserved OS=Leishmania_mexicana_MHOM/GT/2001/U1103 GN=LmxM.08_29.2130	LmxM.08_29.2130	1.61498	0.0016697	Up	52.359	19.2	7	7	7	86350	188700	189820	164610	113010	169040	142790	118640	145570	234770	230030	224520	127310	137250	150460	188610	231680	130880	0.522622	1.14208	1.14886	0.996281	0.683979	1.02309	0.864218	0.718054	0.881044	1.42092	1.39223	1.35888	0.770528	0.830688	0.91064	1.14154	1.40221	0.792135	extracellular
LmxM.09.0410	kinetoplastid kinetochore protein 19, putative OS=Leishmania_mexicana_MHOM/GT/2001/U1103 GN=LmxM.09.0410	LmxM.09.0410	1.78076	0.00183469	Up	47.8	31.2	11	2	2	157650	137210	131890	94035	58551	61765	88924	83388	84854	149770	133100	136960	105820	94186	92476	42269	50576	41388	1.62636	1.4155	1.36062	0.970093	0.60403	0.637186	0.917366	0.860255	0.875379	1.54507	1.3731	1.41292	1.09167	0.971651	0.95401	0.43606	0.521757	0.426971	nucleus	K08823	CLK2_3; dual specificity protein kinase CLK2/3 [EC:2.7.12.1]
LmxM.09.0610	Glucosidase II beta subunit-like, putative OS=Leishmania_mexicana_MHOM/GT/2001/U1103 GN=LmxM.09.0610	LmxM.09.0610	1.67779	0.010531	Up	92.236	42.3	23	23	23	284830	296610	308290	153240	132040	134060	257870	264570	271900	347700	349940	320510	254960	256900	267870	462610	457440	446510	0.973251	1.0135	1.05341	0.523614	0.451175	0.458077	0.88113	0.904023	0.92907	1.18807	1.19573	1.09517	0.871187	0.877815	0.915299	1.58072	1.56305	1.5257	nucleus	K08288	PRKCSH; protein kinase C substrate 80K-H
LmxM.09.0910	calmodulin, putative OS=Leishmania_mexicana_MHOM/GT/2001/U1103 GN=LmxM.09.0910	LmxM.09.0910	1.64761	0.0142901	Up	16.824	71.1	14	14	14	8699400	8792300	8882300	3570600	3772200	3854400	7369700	7301800	7284000	8957900	9185000	9168500	7227800	7147000	7093900	12572000	12769000	12813000	1.06915	1.08057	1.09163	0.438826	0.463603	0.473705	0.905735	0.89739	0.895202	1.10092	1.12883	1.12681	0.888295	0.878365	0.871839	1.5451	1.56931	1.57471	cytoplasm,nucleus	K02183	CALM; calmodulin
LmxM.10.0630	Flagellum adhesion protein 1 OS=Leishmania_mexicana_MHOM/GT/2001/U1103 GN=LmxM.10.0630	LmxM.10.0630	1.7558	0.000117341	Up	63.062	11.6	5	5	5	123820	126420	119720	0	0	0	79186	75901	73105	140800	127030	132830	0	60487	50318	107690	133860	93192	1.20017	1.22537	1.16043				0.76754	0.735699	0.708598	1.36476	1.23129	1.28751		0.586293	0.487726	1.04383	1.29749	0.903299	plasma membrane
LmxM.10.0750	hypothetical protein, conserved OS=Leishmania_mexicana_MHOM/GT/2001/U1103 GN=LmxM.10.0750	LmxM.10.0750	2.15248	0.0209281	Up	204.54	7	8	8	8	341730	301180	156590	277960	149310	239590	104600	90422	127220	343910	281200	439400	342920	99264	190590	209580	198370	218210	1.49588	1.31838	0.685454	1.21674	0.653587	1.04878	0.457874	0.395812	0.556891	1.50543	1.23092	1.92342	1.50109	0.434517	0.834285	0.917412	0.868341	0.955189	nucleus
LmxM.10.1030	RNA-binding protein-like protein OS=Leishmania_mexicana_MHOM/GT/2001/U1103 GN=LmxM.10.1030	LmxM.10.1030	1.57202	0.00102167	Up	41.251	16.5	6	6	6	637720	561170	604600	410900	441530	502290	551090	571240	573490	774520	830250	792980	653410	596660	602090	754420	881800	1120200	0.967842	0.851666	0.917578	0.623607	0.670093	0.762306	0.836368	0.866948	0.870363	1.17546	1.26004	1.20347	0.991655	0.905527	0.913768	1.14495	1.33827	1.70008	nucleus	K14838	NOP15; nucleolar protein 15
LmxM.11.0960	40S ribosomal protein S5 OS=Leishmania_mexicana_MHOM/GT/2001/U1103 GN=LmxM.11.0960	LmxM.11.0960	1.52149	6.5891e-05	Up	21.286	62.1	12	12	12	4615200	4721100	5206400	3025200	3747500	3734700	3653900	3696100	3681100	5530400	5335700	5519200	4659100	4929700	5045700	3800400	3724100	3861700	1.05844	1.08272	1.19402	0.69379	0.85944	0.856504	0.837974	0.847652	0.844212	1.26832	1.22367	1.26576	1.0685	1.13056	1.15716	0.871571	0.854073	0.88563	cytoplasm	K02989	RP-S5e, RPS5; small subunit ribosomal protein S5e
LmxM.11.1130	60S ribosomal protein L28, putative OS=Leishmania_mexicana_MHOM/GT/2001/U1103 GN=LmxM.11.1130	LmxM.11.1130	1.72555	0.0283452	Up	16.236	50.3	9	9	9	2335000	2361000	2250600	2710400	3212800	3056500	1153200	1133500	1134400	3680900	3364200	3654000	2121300	2028000	2023600	657200	729640	871710	1.09231	1.10448	1.05283	1.26793	1.50295	1.42983	0.539467	0.530252	0.530673	1.72193	1.57377	1.70934	0.992345	0.948699	0.946641	0.307438	0.341326	0.407786	nucleus	K02903	RP-L28e, RPL28; large subunit ribosomal protein L28e
LmxM.11.1250	ATP-binding cassette protein subfamily A, member 4, putative OS=Leishmania_mexicana_MHOM/GT/2001/U1103 GN=LmxM.11.1250	LmxM.11.1250	1.84637	0.00228361	Up	227.44	2.8	4	4	4	106430	125770	97834	98658	96174	0	120330	0	77456	171490	188350	183850	114730	110250	76281	203010	195140	301360	0.751123	0.887613	0.690457	0.696272	0.678742		0.849221		0.546641	1.21028	1.32927	1.29751	0.809699	0.778082	0.538348	1.43273	1.37719	2.12683	plasma membrane	K05642	ABCA2; ATP-binding cassette, subfamily A (ABC1), member 2
LmxM.11.1300	hypothetical protein, conserved OS=Leishmania_mexicana_MHOM/GT/2001/U1103 GN=LmxM.11.1300	LmxM.11.1300	1.73087	0.00631637	Up	20.968	31.7	4	4	4	54985	58153	60626	48455	51832	68529	32030	47572	55025	87266	88655	86689	42135	59396	55816	87001	99657	87854	0.844713	0.893382	0.931374	0.744395	0.796275	1.05278	0.492064	0.73083	0.845328	1.34063	1.36197	1.33177	0.647304	0.912478	0.857479	1.33656	1.53099	1.34967	nucleus
LmxM.12.0320	Myotubularin-related protein, putative OS=Leishmania_mexicana_MHOM/GT/2001/U1103 GN=LmxM.12.0320	LmxM.12.0320	2.27198	0.010131	Up	334.39	4.7	10	10	10	58439	50608	53615	52285	79878	50966	0	33562	29717	121940	112520	101440	80314	51018	59731	68399	86195	78822	0.849514	0.735676	0.779388	0.760055	1.16117	0.740881		0.487883	0.431989	1.77261	1.63568	1.47461	1.16751	0.741636	0.868295	0.9943	1.253	1.14582	cytoplasm	K18082	MTMR3_4, ZFYVE10_11; myotubularin-related protein 3/4 [EC:3.1.3.48 3.1.3.64 3.1.3.95]
LmxM.12.0860	surface antigen, putative OS=Leishmania_mexicana_MHOM/GT/2001/U1103 GN=LmxM.12.0860	LmxM.12.0860	1.99291	0.0076285	Up	74.47	12.4	7	7	7	144620	115300	150430	71570	66103	55163	155150	123010	148510	212530	186220	218560	192750	197970	163430	359430	416050	496940	0.749383	0.597455	0.779489	0.370857	0.342529	0.28584	0.803947	0.637406	0.76954	1.10128	0.964944	1.13252	0.998781	1.02583	0.846852	1.86247	2.15586	2.57501	extracellular
LmxM.13.0630	hypothetical protein, conserved OS=Leishmania_mexicana_MHOM/GT/2001/U1103 GN=LmxM.13.0630	LmxM.13.0630	1.57491	0.00299746	Up	31.671	25.4	5	5	5	86726	86764	79992	34797	44514	41963	52569	48583	56674	76137	72291	71351	63507	50664	62774	82163	69392	77272	1.34792	1.34851	1.24326	0.540824	0.691848	0.6522	0.817041	0.755089	0.880842	1.18334	1.12357	1.10896	0.987042	0.787433	0.97565	1.277	1.07851	1.20098	nucleus
LmxM.14.0140	histone acetyltransferase, putative OS=Leishmania_mexicana_MHOM/GT/2001/U1103 GN=LmxM.14.0140	LmxM.14.0140	2.89431	8.80509e-06	Up	57.776	4.2	2	2	2	327640	569690	328130	186680	176520	195020	142870	128160	124830	505730	443500	431470	136570	133600	163020	136960	203670	139190	1.3184	2.29239	1.32037	0.751185	0.710302	0.784745	0.574897	0.515706	0.502306	2.03502	1.78461	1.7362	0.549547	0.537596	0.655979	0.551116	0.819552	0.560089	mitochondria	K11304	TIP60, KAT5, ESA1; histone acetyltransferase HTATIP [EC:2.3.1.48]
LmxM.14.0280	Nucleus and spindle associated protein 3, putative OS=Leishmania_mexicana_MHOM/GT/2001/U1103 GN=LmxM.14.0280	LmxM.14.0280	1.53506	0.012821	Up	108.79	55.7	44	44	44	225110	213100	230080	124180	124660	127220	214000	221600	218670	269440	265250	256120	222080	211740	212350	329030	291740	296180	0.999859	0.946515	1.02193	0.551564	0.553696	0.565066	0.950513	0.984269	0.971255	1.19676	1.17815	1.13759	0.986401	0.940475	0.943184	1.46144	1.29581	1.31553	nucleus
LmxM.14.0460	cystathionine beta-lyase-like protein OS=Leishmania_mexicana_MHOM/GT/2001/U1103 GN=LmxM.14.0460	LmxM.14.0460	1.694	0.00036663	Up	50.022	41	13	12	13	537230	552100	539120	530610	507220	488700	382970	381950	377030	756850	737740	765610	525430	540370	511730	525260	496110	498880	1.00158	1.0293	1.0051	0.989236	0.945629	0.911101	0.713985	0.712083	0.702911	1.41102	1.3754	1.42735	0.979578	1.00743	0.954037	0.979261	0.924916	0.93008	cytoplasm	K01758	CTH; cystathionine gamma-lyase [EC:4.4.1.1]
LmxM.14.0610	hypothetical protein, conserved OS=Leishmania_mexicana_MHOM/GT/2001/U1103 GN=LmxM.14.0610	LmxM.14.0610	1.98023	0.0283634	Up	54.344	10.5	3	3	3	22876	22089	24532	10800	9312.6	0	22853	18098	24801	34098	34394	33527	27509	28273	28007	57310	62752	53837	0.75503	0.729054	0.809686	0.356457	0.307365		0.75427	0.59733	0.818565	1.12542	1.13518	1.10657	0.907943	0.933159	0.92438	1.89153	2.07115	1.77691	nucleus
LmxM.14.1070	protein kinase, putative OS=Leishmania_mexicana_MHOM/GT/2001/U1103 GN=LmxM.14.1070	LmxM.14.1070	1.61939	0.000299679	Up	113.51	20.1	16	16	16	563110	568350	527810	331450	356080	364930	452190	474830	466870	624740	702830	653230	497130	487590	469750	654730	659930	596300	1.07238	1.08236	1.00516	0.63121	0.678115	0.694969	0.861146	0.904261	0.889102	1.18975	1.33846	1.244	0.946729	0.928561	0.894587	1.24686	1.25676	1.13559	nucleus	K18669	DYRK2_3_4; dual specificity tyrosine-phosphorylation-regulated kinase 2/3/4 [EC:2.7.12.1]
LmxM.14.1100	kinesin K39, putative OS=Leishmania_mexicana_MHOM/GT/2001/U1103 GN=LmxM.14.1100	LmxM.14.1100	1.50862	0.0377827	Up	536.11	26.4	22	10	11	612120	601760	593480	133370	126960	157150	288770	310750	289840	327210	310410	348140	409750	408350	397510	223460	249490	217820	1.83442	1.80337	1.77856	0.399688	0.380478	0.470952	0.865396	0.931266	0.868602	0.980594	0.930247	1.04332	1.22795	1.22376	1.19127	0.669672	0.74768	0.65277	nucleus	K17914	KIF13; kinesin family member 13
LmxM.14.1360	myo-inositol-1-phosphate synthase OS=Leishmania_mexicana_MHOM/GT/2001/U1103 GN=LmxM.14.1360	LmxM.14.1360	1.63471	0.000850666	Up	58.19	60.3	26	26	26	1133600	1114300	1153300	651880	680050	682270	949420	903200	905660	1293500	1303800	1303500	1029000	1029400	1025800	3052200	3051100	3066200	0.838731	0.824451	0.853307	0.482315	0.503157	0.5048	0.702459	0.668262	0.670082	0.957038	0.964659	0.964437	0.761339	0.761635	0.758972	2.25827	2.25746	2.26863	cytoplasm	K01858	INO1, ISYNA1; myo-inositol-1-phosphate synthase [EC:5.5.1.4]
LmxM.14.1440	cytoskeleton associated protein, putative OS=Leishmania_mexicana_MHOM/GT/2001/U1103 GN=LmxM.14.1440	LmxM.14.1440	1.56639	0.00220558	Up	108.73	39.2	28	28	28	1052900	1101600	1084200	539220	528500	554000	764460	799230	763540	1029900	1044000	1018900	810830	811000	807730	1231900	1244700	1220500	1.15512	1.20855	1.18946	0.59157	0.57981	0.607785	0.838678	0.876824	0.837669	1.12989	1.14536	1.11782	0.88955	0.889736	0.886149	1.3515	1.36554	1.33899	nucleus
LmxM.15.0370	60S acidic ribosomal protein, putative OS=Leishmania_mexicana_MHOM/GT/2001/U1103 GN=LmxM.15.0370	LmxM.15.0370	1.57046	0.0398012	Up	10.106	44.9	5	3	4	2283200	2033000	2578900	3129700	2336000	2281000	1422700	2694200	2020000	2990600	4628400	3282800	2115400	2205900	3717500	2855300	3940600	3626300	0.819632	0.729815	0.925784	1.12351	0.838587	0.818843	0.510727	0.967175	0.725148	1.07358	1.66152	1.17847	0.759395	0.791883	1.33452	1.02501	1.41461	1.30178	extracellular
LmxM.15.0440a	hypothetical protein OS=Leishmania_mexicana_MHOM/GT/2001/U1103 GN=LmxM.15.0440a	LmxM.15.0440a	9.43663	0.00311766	Up	93.542	62.7	31	28	31	403290	639060	398830	9106.3	3322.6	16034	78330	75721	76676	466090	469820	287030	498880	494830	308870	4257700	3547300	4956500	0.42733	0.677154	0.422604	0.00964912	0.00352066	0.0169898	0.0829992	0.0802347	0.0812466	0.493873	0.497826	0.30414	0.528618	0.524327	0.327282	4.5115	3.75875	5.25195	nucleus
LmxM.15.0440c	hypothetical protein (fragment) OS=Leishmania_mexicana_MHOM/GT/2001/U1103 GN=LmxM.15.0440c	LmxM.15.0440c	2.17417	0.00348482	Up	76.905	41.8	19	16	16	216600	186990	172700	0	0	0	23457	22422	33199	58746	59479	53704	128250	127000	122970	343200	273570	312900	1.52165	1.31363	1.21324				0.164789	0.157518	0.233228	0.412699	0.417849	0.377278	0.900975	0.892194	0.863882	2.41103	1.92187	2.19817	nucleus
LmxM.15.0520	ecotin, putative OS=Leishmania_mexicana_MHOM/GT/2001/U1103 GN=LmxM.15.0520	LmxM.15.0520	2.10034	0.00629237	Up	40.928	33.9	12	12	12	281810	304170	279310	72453	63440	76763	163810	156920	157520	235470	237960	252140	286650	289980	293880	398830	400570	405110	1.16429	1.25667	1.15397	0.299339	0.262101	0.317145	0.676779	0.648313	0.650792	0.972841	0.983128	1.04171	1.18429	1.19805	1.21416	1.64776	1.65495	1.67371	nucleus
LmxM.15.1400	hypothetical protein, conserved OS=Leishmania_mexicana_MHOM/GT/2001/U1103 GN=LmxM.15.1400	LmxM.15.1400	1.80835	0.0113599	Up	33.774	28.1	6	6	6	53655	47486	40391	27402	20770	24136	51221	53164	49566	65494	62402	76682	46501	41845	47154	87985	111600	88147	0.970057	0.858525	0.73025	0.495415	0.375512	0.436368	0.926052	0.96118	0.89613	1.1841	1.1282	1.38637	0.840716	0.756538	0.852522	1.59073	2.01768	1.59366	mitochondria
LmxM.16.0140	eukaryotic translation initiation factor 1A, putative OS=Leishmania_mexicana_MHOM/GT/2001/U1103 GN=LmxM.16.0140	LmxM.16.0140	2.24763	0.00186924	Up	18.693	50	9	9	9	954930	1001100	963200	426350	423580	426660	816220	811060	816490	1430900	1377300	1372800	774600	755980	746800	1556400	1544400	1584000	0.966595	1.01333	0.974966	0.431558	0.428754	0.431872	0.826191	0.820968	0.826464	1.44838	1.39412	1.38957	0.784062	0.765215	0.755923	1.57541	1.56327	1.60335	cytoplasm	K03236	EIF1A; translation initiation factor 1A
LmxM.16.0170	hypothetical protein, conserved OS=Leishmania_mexicana_MHOM/GT/2001/U1103 GN=LmxM.16.0170	LmxM.16.0170	2.74898	0.0122843	Up	486.09	13.2	37	37	37	294750	277930	263030	46898	48418	34426	177980	194220	179380	295610	323980	316880	241260	285160	265010	408350	420270	375220	1.19258	1.12452	1.06424	0.189752	0.195902	0.13929	0.720118	0.785826	0.725782	1.19606	1.31084	1.28212	0.976153	1.15377	1.07225	1.65221	1.70044	1.51816	plasma membrane
LmxM.16.0220	hypothetical protein, unknown function OS=Leishmania_mexicana_MHOM/GT/2001/U1103 GN=LmxM.16.0220	LmxM.16.0220	2.17129	0.00782727	Up	14.563	28.2	2	2	2	257660	217790	272220	203670	148490	253230	309670	385160	375190	623010	550150	645740	624900	475250	467500	289500	250460	298470	0.697629	0.589679	0.737051	0.551448	0.402045	0.685635	0.838449	1.04284	1.01585	1.68683	1.48956	1.74838	1.69195	1.28677	1.26578	0.783838	0.678135	0.808124	nucleus
LmxM.16.0320	FHA domain containing protein, putative OS=Leishmania_mexicana_MHOM/GT/2001/U1103 GN=LmxM.16.0320	LmxM.16.0320	1.60412	6.85504e-06	Up	132.98	17.9	14	14	14	299670	322550	330230	269810	282560	238100	261830	249230	252110	432200	417000	396910	268740	268760	284260	267460	248790	240500	1.01188	1.08914	1.11507	0.911057	0.954109	0.803983	0.884111	0.841565	0.85129	1.45939	1.40807	1.34023	0.907444	0.907511	0.95985	0.903122	0.840079	0.812087	plasma membrane
LmxM.16.0680	apurinic/apyrimidinic endonuclease-redox protein OS=Leishmania_mexicana_MHOM/GT/2001/U1103 GN=LmxM.16.0680	LmxM.16.0680	1.51979	0.0378437	Up	48.81	53.7	15	15	15	1570700	1470000	1525900	715140	722730	749640	1561800	1628500	1623400	1766200	1723800	1830200	1496200	1443800	1463600	3161100	3207300	3324500	0.912475	0.853975	0.886449	0.41545	0.419859	0.435492	0.907305	0.946053	0.943091	1.02605	1.00142	1.06323	0.869196	0.838755	0.850257	1.8364	1.86323	1.93132	nucleus	K10771	APEX1; AP endonuclease 1 [EC:4.2.99.18]
LmxM.16.0920	flagellar calcium-binding protein, putative OS=Leishmania_mexicana_MHOM/GT/2001/U1103 GN=LmxM.16.0920	LmxM.16.0920	3.30643	0.0052691	Up	23.055	27.6	5	5	5	24184	29271	135780	0	0	0	34977	40250	23002	96006	89151	139630	91442	54854	71470	809120	779290	756780	0.114248	0.138279	0.641438				0.165235	0.190145	0.108664	0.453542	0.421158	0.659626	0.431981	0.259136	0.337632	3.82236	3.68145	3.57511	mitochondria
LmxM.16.1050	Protein of unknown function (DUF3184), putative OS=Leishmania_mexicana_MHOM/GT/2001/U1103 GN=LmxM.16.1050	LmxM.16.1050	2.00319	0.00503893	Up	111.62	37.2	26	12	26	383510	366610	412400	125950	135180	125860	275660	260060	251470	399450	393560	383040	341550	330670	329960	834410	858790	845590	0.978658	0.935532	1.05238	0.321405	0.344958	0.321175	0.703442	0.663633	0.641712	1.01933	1.0043	0.977459	0.871583	0.843819	0.842007	2.12928	2.1915	2.15781	extracellular
LmxM.16.1110	Polyketide cyclase / dehydrase and lipid transport, putative OS=Leishmania_mexicana_MHOM/GT/2001/U1103 GN=LmxM.16.1110	LmxM.16.1110	2.25173	5.82187e-06	Up	38.961	25.1	6	6	6	412230	354570	300890	195720	186610	191250	217770	227850	232780	515950	429540	464070	430180	444000	380880	99546	264610	268460	1.32104	1.13626	0.964235	0.627207	0.598013	0.612882	0.697868	0.730171	0.745969	1.65342	1.37651	1.48716	1.37856	1.42285	1.22057	0.319006	0.847972	0.86031	mitochondria	K18588	COQ10; coenzyme Q-binding protein COQ10
LmxM.16.1190	Domain of unknown function DUF221, putative OS=Leishmania_mexicana_MHOM/GT/2001/U1103 GN=LmxM.16.1190	LmxM.16.1190	1.59361	0.00923831	Up	158.12	25.8	25	25	25	318570	327050	300600	161460	153160	148360	271790	271290	268320	333830	361990	319610	340010	338020	317710	265840	297110	301120	1.12528	1.15524	1.06181	0.570324	0.541006	0.524051	0.960042	0.958276	0.947785	1.17919	1.27865	1.12896	1.20101	1.19399	1.12224	0.939025	1.04948	1.06364	plasma membrane
LmxM.16.1220	Cullin family/Cullin protein neddylation domain containing protein, putative OS=Leishmania_mexicana_MHOM/GT/2001/U1103 GN=LmxM.16.1220	LmxM.16.1220	1.59576	0.027549	Up	233.92	6.7	11	11	11	43268	31973	35881	27000	21112	16801	34690	34759	31071	39827	48623	43546	43329	33878	36464	56350	48131	46578	1.15676	0.85479	0.95927	0.721838	0.564424	0.449171	0.927429	0.929273	0.830675	1.06476	1.29992	1.16419	1.15839	0.90572	0.974856	1.5065	1.28677	1.24525	plasma membrane	K03869	CUL3; cullin 3
LmxM.16.1240	hypothetical protein, unknown function OS=Leishmania_mexicana_MHOM/GT/2001/U1103 GN=LmxM.16.1240	LmxM.16.1240	1.75235	0.00167224	Up	227.15	9.2	14	14	14	116030	112360	108380	66448	53474	52031	79887	90945	91306	133680	128350	118310	99845	107830	104440	105460	97579	103500	1.18006	1.14274	1.10226	0.675798	0.543848	0.529172	0.812477	0.92494	0.928612	1.35957	1.30536	1.20325	1.01546	1.09667	1.06219	1.07256	0.99241	1.05263	nucleus
LmxM.16.1260	hypothetical protein, conserved OS=Leishmania_mexicana_MHOM/GT/2001/U1103 GN=LmxM.16.1260	LmxM.16.1260	1.74582	0.00417154	Up	187.19	12	16	16	16	1932000	1720000	1812100	755880	773250	794980	1444400	1093100	1371100	1878300	1781700	1780600	1751000	1743800	1697300	2135900	2136300	2454400	1.19686	1.06552	1.12258	0.468261	0.479021	0.492483	0.894793	0.677166	0.849384	1.16359	1.10375	1.10307	1.08473	1.08027	1.05146	1.32317	1.32342	1.52048	plasma membrane
LmxM.16.1290	diacylglycerol kinase, putative OS=Leishmania_mexicana_MHOM/GT/2001/U1103 GN=LmxM.16.1290	LmxM.16.1290	1.52784	0.00150868	Up	77.797	20.8	8	8	8	218360	184760	210890	136910	134090	135470	176360	191380	198890	261450	240430	241490	188970	196520	200580	169960	181130	175080	1.14168	0.966004	1.10262	0.715824	0.701079	0.708295	0.922085	1.00062	1.03988	1.36697	1.25707	1.26261	0.988015	1.02749	1.04872	0.888623	0.947024	0.915392	nucleus
LmxM.16.1340	hypothetical protein, conserved OS=Leishmania_mexicana_MHOM/GT/2001/U1103 GN=LmxM.16.1340	LmxM.16.1340	1.52742	4.00838e-08	Up	399.74	15.4	39	39	39	515630	480260	517140	389610	381280	370680	390300	398740	396920	588030	600510	589020	507490	489780	497750	379150	383030	407860	1.1205	1.04364	1.12379	0.846653	0.828551	0.805517	0.848153	0.866493	0.862538	1.27784	1.30496	1.27999	1.10282	1.06433	1.08165	0.823923	0.832354	0.886312	plasma membrane
LmxM.16.1350	DNA-directed rna polymerase I largest subunit, putative OS=Leishmania_mexicana_MHOM/GT/2001/U1103 GN=LmxM.16.1350	LmxM.16.1350	1.68124	0.0241452	Up	200.17	41.4	51	51	51	285530	291300	289280	115550	116180	113380	269420	268540	270510	331430	316350	321940	254830	251600	251650	353960	352240	341770	1.07175	1.09341	1.08583	0.433723	0.436087	0.425578	1.01128	1.00798	1.01537	1.24404	1.18744	1.20842	0.956517	0.944393	0.944581	1.32861	1.32215	1.28285	nucleus	K02999	RPA1, POLR1A; DNA-directed RNA polymerase I subunit RPA1 [EC:2.7.7.6]
LmxM.16.1420	hypothetical protein, conserved OS=Leishmania_mexicana_MHOM/GT/2001/U1103 GN=LmxM.16.1420	LmxM.16.1420	1.5867	0.00219975	Up	39.592	44.9	14	13	14	2068000	2112300	2180000	2522100	2502800	2513300	1726900	1723700	1731400	3415000	3357300	3319300	1915800	1917700	1863800	2967800	2952300	2970400	0.850642	0.868864	0.896711	1.03743	1.02949	1.03381	0.710335	0.709019	0.712186	1.40471	1.38098	1.36535	0.788037	0.788818	0.766647	1.22076	1.21439	1.22183	mitochondria
LmxM.16.1650	Clustered mitochondria, putative OS=Leishmania_mexicana_MHOM/GT/2001/U1103 GN=LmxM.16.1650	LmxM.16.1650	1.84104	0.00226898	Up	76.621	25.4	12	12	12	128840	126010	124200	41403	36324	46827	65423	69575	68727	98049	105650	98488	111130	102620	100920	117560	118100	117270	1.3828	1.35243	1.333	0.444366	0.389855	0.502581	0.702166	0.746728	0.737627	1.05233	1.13391	1.05704	1.19273	1.10139	1.08315	1.26174	1.26753	1.25862	mitochondria
LmxM.17.0800	OSM3-like kinesin, putative OS=Leishmania_mexicana_MHOM/GT/2001/U1103 GN=LmxM.17.0800	LmxM.17.0800	1.59742	0.0103503	Up	104.79	30	21	20	20	308670	329940	310140	101070	116330	91891	179070	193120	161030	223360	231090	218470	317550	302750	311180	277450	263150	252730	1.32635	1.41774	1.33266	0.434296	0.499867	0.394854	0.76946	0.829832	0.691942	0.959773	0.992989	0.938761	1.36451	1.30091	1.33713	1.1922	1.13075	1.08598	nucleus	K10394	KIF3A; kinesin family member 3A
LmxM.17.0990	hypothetical protein, conserved OS=Leishmania_mexicana_MHOM/GT/2001/U1103 GN=LmxM.17.0990	LmxM.17.0990	1.94431	1.36995e-06	Up	675.34	6	25	25	25	134960	124870	111160	61206	59413	59906	66410	71281	60993	119020	124030	125600	92390	94487	98576	91562	106790	105060	1.42253	1.31618	1.17167	0.645136	0.626237	0.631434	0.699988	0.751331	0.642891	1.25452	1.30733	1.32388	0.973828	0.995931	1.03903	0.965101	1.12561	1.10738	cytoplasm
LmxM.18.0090	alpha glucosidase II subunit, putative OS=Leishmania_mexicana_MHOM/GT/2001/U1103 GN=LmxM.18.0090	LmxM.18.0090	1.86531	0.0150148	Up	91.066	34.6	22	22	22	366430	370920	341870	222410	223400	222090	543960	548110	526790	713140	695270	724350	353610	361910	343680	1053600	1036000	1018400	0.682369	0.690731	0.636633	0.414174	0.416017	0.413578	1.01297	1.0207	0.980993	1.32802	1.29474	1.34889	0.658496	0.673952	0.640004	1.96202	1.92925	1.89647	lysozyme	K05546	GANAB; mannosyl-oligosaccharide alpha-1,3-glucosidase [EC:3.2.1.207]
LmxM.18.0310	hypothetical protein, conserved OS=Leishmania_mexicana_MHOM/GT/2001/U1103 GN=LmxM.18.0310	LmxM.18.0310	2.01538	0.00462083	Up	11.997	27.5	2	2	2	173470	242190	244970	84553	87641	0	138720	139310	137160	231010	209470	269800	114750	111900	207420	80295	77655	128850	1.10071	1.53676	1.5544	0.536511	0.556105		0.880215	0.883959	0.870316	1.46582	1.32914	1.71195	0.728119	0.710035	1.31613	0.509493	0.492741	0.817587	extracellular
LmxM.18.0840	hypothetical protein, conserved OS=Leishmania_mexicana_MHOM/GT/2001/U1103 GN=LmxM.18.0840	LmxM.18.0840	1.5681	0.00409404	Up	211.23	12.3	16	15	15	174200	182270	179520	161370	137240	160650	106600	90299	104850	187980	197460	211230	163320	178090	176970	244420	255670	248020	0.992229	1.03819	1.02253	0.91915	0.781708	0.915049	0.607185	0.514336	0.597217	1.07072	1.12472	1.20315	0.930257	1.01439	1.00801	1.3922	1.45627	1.4127	plasma membrane
LmxM.18.1200	Complex 1 protein (LYR family), putative OS=Leishmania_mexicana_MHOM/GT/2001/U1103 GN=LmxM.18.1200	LmxM.18.1200	1.77767	0.00123011	Up	30.201	21.1	3	3	3	0	0	46627	43726	48813	48388	0	0	0	85127	0	81887	0	34369	0	0	0	21154			0.909593	0.853001	0.952237	0.943947				1.66065		1.59744		0.670466				0.412669	nucleus	K18167	SDHAF1; succinate dehydrogenase assembly factor 1
LmxM.19.0160	metallo-peptidase, Clan MG, Family M24 OS=Leishmania_mexicana_MHOM/GT/2001/U1103 GN=LmxM.19.0160	LmxM.19.0160	3.00892	8.24609e-05	Up	42.47	53.4	21	21	21	851640	849210	850430	359880	359120	355070	553720	559360	546520	1381200	1356500	1375000	659800	661860	647330	943320	926150	925320	1.08248	1.0794	1.08095	0.457428	0.456462	0.451315	0.70381	0.710979	0.694659	1.75559	1.72419	1.7477	0.838644	0.841262	0.822794	1.19901	1.17719	1.17614	cytoplasm
LmxM.19.0750	hypothetical protein, conserved OS=Leishmania_mexicana_MHOM/GT/2001/U1103 GN=LmxM.19.0750	LmxM.19.0750	2.05298	0.00477215	Up	56.653	17.7	5	4	5	40501	0	52376	47304	0	0	33241	49479	0	94204	87680	85053	31569	0	0	80687	91918	85695	0.623326		0.806087	0.728027			0.511592	0.761501		1.44984	1.34943	1.309	0.485859			1.2418	1.41465	1.31888	cytoplasm
LmxM.19.0860	ATG8/AUT7/APG8/PAZ2, putative OS=Leishmania_mexicana_MHOM/GT/2001/U1103 GN=LmxM.19.0860	LmxM.19.0860	2.57254	0.0173987	Up	12.548	59.5	7	7	7	2999600	3030200	3085700	258640	265100	252020	1241500	1229400	1251700	1957800	1940000	1888300	2986600	2912000	3040300	6086900	6329300	6462800	1.14348	1.15515	1.1763	0.0985966	0.101059	0.096073	0.473274	0.468662	0.477163	0.746336	0.739551	0.719842	1.13853	1.11009	1.159	2.3204	2.4128	2.46369	extracellular	K08341	GABARAP, ATG8, LC3; GABA(A) receptor-associated protein
LmxM.19.1080	hypothetical protein, conserved OS=Leishmania_mexicana_MHOM/GT/2001/U1103 GN=LmxM.19.1080	LmxM.19.1080	3.71475	9.70007e-05	Up	400.8	1.9	4	4	4	319600	208290	206980	127640	127620	114290	0	0	113490	540600	346580	458600	208010	259190	259820	129360	0	177120	1.33271	0.868553	0.86309	0.532249	0.532165	0.47658			0.473244	2.25426	1.44521	1.91233	0.867385	1.0808	1.08343	0.539421		0.738576	plasma membrane
LmxM.19.1160	hypothetical protein, conserved OS=Leishmania_mexicana_MHOM/GT/2001/U1103 GN=LmxM.19.1160	LmxM.19.1160	2.40328	0.00252088	Up	41.311	61	19	19	19	806030	792930	798400	282660	268070	276150	586270	599890	575590	1043900	1028700	1038000	577310	566260	554380	1086700	1035800	1056600	1.11831	1.10013	1.10772	0.392171	0.371928	0.383138	0.813408	0.832305	0.79859	1.44834	1.42725	1.44015	0.800976	0.785645	0.769163	1.50772	1.4371	1.46596	nucleus
LmxM.19.1410	Cid1 family poly A polymerase, putative OS=Leishmania_mexicana_MHOM/GT/2001/U1103 GN=LmxM.19.1410	LmxM.19.1410	1.6918	0.0454627	Up	104.66	28.4	19	19	19	461100	427950	440230	120260	119650	128370	386380	393800	386080	438970	426990	432110	385720	393760	371530	415010	420970	429940	1.26159	1.17089	1.20449	0.329038	0.327369	0.351227	1.05716	1.07746	1.05634	1.20105	1.16827	1.18228	1.05535	1.07735	1.01653	1.13549	1.1518	1.17634	nucleus	K13291	TUT; terminal uridylyltransferase [EC:2.7.7.52]
LmxM.19.1530	peptidylprolyl isomerase-like protein OS=Leishmania_mexicana_MHOM/GT/2001/U1103 GN=LmxM.19.1530	LmxM.19.1530	2.06108	3.15504e-07	Up	47.776	47.7	17	17	17	446830	486150	470830	271680	272020	295350	295330	320750	299980	593830	619260	595620	387560	385810	374220	751060	729250	764770	0.96204	1.0467	1.01371	0.584936	0.585668	0.635898	0.635855	0.690585	0.645867	1.27854	1.33329	1.28239	0.834429	0.830662	0.805708	1.61706	1.5701	1.64657	cytoplasm	K09571	FKBP4_5; FK506-binding protein 4/5 [EC:5.2.1.8]
LmxM.20.0050	histone chaperone ASF1A OS=Leishmania_mexicana_MHOM/GT/2001/U1103 GN=LmxM.20.0050	LmxM.20.0050	1.50423	0.0112904	Up	17.613	26.6	3	3	3	1276300	1459900	1286400	959990	1304700	0	927480	1057200	1118500	1522500	0	1707300	932520	142480	257950	863010	798850	917310	1.2352	1.41289	1.24497	0.929076	1.26268		0.897613	1.02316	1.08248	1.47347		1.65232	0.90249	0.137892	0.249643	0.835219	0.773125	0.88777	extracellular	K10753	ASF1; histone chaperone ASF1
LmxM.20.0070	hypothetical protein, conserved OS=Leishmania_mexicana_MHOM/GT/2001/U1103 GN=LmxM.20.0070	LmxM.20.0070	1.52536	7.28147e-07	Up	23.092	11.3	2	2	2	2181300	2388700	0	1454700	1552100	1467900	1409700	1376700	1419200	2241800	2206100	2172400	1484300	1550500	1400800	1472900	1461000	1350200	1.29702	1.42034		0.864975	0.92289	0.872824	0.838218	0.818596	0.843867	1.33299	1.31176	1.29172	0.882576	0.921939	0.832926	0.875797	0.868721	0.802839	nucleus
LmxM.20.0090	Ion channel/Calcium-activated BK potassium channel alpha subunit, putative OS=Leishmania_mexicana_MHOM/GT/2001/U1103 GN=LmxM.20.0090	LmxM.20.0090	1.52339	4.89656e-05	Up	126.88	16.3	14	14	14	90520	80385	82014	51108	48058	46861	58274	55934	59121	83741	79122	80389	67301	70180	67243	70152	74638	85181	1.30326	1.15734	1.18079	0.735825	0.691912	0.674679	0.838997	0.805307	0.851191	1.20566	1.13915	1.1574	0.968962	1.01041	0.968127	1.01001	1.0746	1.22639	plasma membrane	K04946	KCNT1, KNA1.1; potassium channel subfamily T member 1
LmxM.20.0770	protein kinase, putative OS=Leishmania_mexicana_MHOM/GT/2001/U1103 GN=LmxM.20.0770	LmxM.20.0770	2.01038	0.0103786	Up	417.73	4.5	11	11	11	756390	593760	628790	234930	294870	263620	452040	167530	375250	674400	588920	534200	577100	520040	505070	1006800	861340	774620	1.38792	1.0895	1.15378	0.431079	0.541064	0.483723	0.829459	0.307405	0.688555	1.23747	1.08062	0.980216	1.05893	0.954234	0.926765	1.8474	1.58049	1.42137	nucleus	K04420	MAP3K2, MEKK2; mitogen-activated protein kinase kinase kinase 2 [EC:2.7.11.25]
LmxM.20.0790	tubulin-tyrosine ligase, putative OS=Leishmania_mexicana_MHOM/GT/2001/U1103 GN=LmxM.20.0790	LmxM.20.0790	1.52023	0.000344244	Up	75.829	21.9	11	11	11	282200	254330	289390	262400	251470	213070	208830	223130	217680	384050	327980	334330	287630	291770	305100	237310	225880	270810	1.0436	0.940539	1.07019	0.970382	0.929962	0.787955	0.772275	0.825158	0.805003	1.42026	1.2129	1.23639	1.06369	1.079	1.12829	0.877597	0.835328	1.00148	nucleus	K16601	TTLL4; tubulin polyglutamylase TTLL4 [EC:6.3.2.62]
LmxM.20.0920	AATF protein, putative OS=Leishmania_mexicana_MHOM/GT/2001/U1103 GN=LmxM.20.0920	LmxM.20.0920	1.61129	0.00145485	Up	65.609	25.4	11	11	11	183410	159030	160880	99310	105730	101490	157690	134220	144120	190990	186610	220640	179310	160290	162130	143870	149080	145720	1.18562	1.02802	1.03998	0.641971	0.683471	0.656063	1.01936	0.86764	0.931636	1.23462	1.2063	1.42629	1.15912	1.03616	1.04806	0.93002	0.963699	0.941979	nucleus
LmxM.20.1000	hypothetical protein, conserved OS=Leishmania_mexicana_MHOM/GT/2001/U1103 GN=LmxM.20.1000	LmxM.20.1000	1.58669	0.0098189	Up	75.936	14.3	6	6	6	79243	68656	57977	73345	82856	71825	52492	42172	39833	97227	89638	100740	67658	67766	65050	30050	59615	22557	1.22048	1.05742	0.892946	1.12964	1.27613	1.10623	0.808468	0.649522	0.613497	1.49746	1.38058	1.55157	1.04205	1.04371	1.00188	0.462822	0.918174	0.347417	nucleus
LmxM.20.1110	hypothetical protein, conserved OS=Leishmania_mexicana_MHOM/GT/2001/U1103 GN=LmxM.20.1110	LmxM.20.1110	1.74908	0.00759844	Up	124.24	18.9	17	17	17	230240	204010	202910	96915	87282	84537	176070	170220	161520	233180	233030	212910	169190	174500	167960	270980	268810	259590	1.21754	1.07883	1.07301	0.512498	0.461558	0.447042	0.93108	0.900144	0.854138	1.23308	1.23229	1.12589	0.894698	0.922778	0.888193	1.43298	1.4215	1.37274	nucleus
LmxM.20.1290	nucleosome assembly protein (NAP), putative OS=Leishmania_mexicana_MHOM/GT/2001/U1103 GN=LmxM.20.1290	LmxM.20.1290	1.90849	0.000420654	Up	31.357	28.6	6	6	6	63534	57085	60056	0	0	0	56048	46735	54801	104080	98423	98244	41145	53445	38398	241460	232390	216010	0.651919	0.585746	0.616231				0.575105	0.479545	0.56231	1.06796	1.00991	1.00808	0.422186	0.548396	0.394	2.47761	2.38454	2.21647	nucleus
LmxM.21.0520	Nucleoporin NUP41 OS=Leishmania_mexicana_MHOM/GT/2001/U1103 GN=LmxM.21.0520	LmxM.21.0520	1.98464	0.0147989	Up	47.308	42.3	14	14	14	165930	150240	167470	162300	145330	155920	57494	57962	57975	213790	207990	210310	213800	208870	205970	235000	222410	227610	0.974031	0.881929	0.983071	0.952722	0.853106	0.915271	0.337497	0.340245	0.340321	1.25498	1.22093	1.23455	1.25503	1.22609	1.20907	1.37948	1.30558	1.3361	mitochondria
LmxM.21.0950	Programmed cell death protein 2, C-terminal putative domain containing protein, putative OS=Leishmania_mexicana_MHOM/GT/2001/U1103 GN=LmxM.21.0950	LmxM.21.0950	1.58027	0.0152982	Up	45.811	30.4	9	9	9	93583	163400	225320	97071	80890	102720	175260	191350	139270	232770	189840	198880	184510	131380	131090	211720	187330	230120	0.567838	0.99147	1.36719	0.589002	0.49082	0.623279	1.06343	1.16106	0.845055	1.41239	1.1519	1.20675	1.11956	0.797181	0.795421	1.28466	1.13667	1.39631	cytoplasm	K14801	TSR4; pre-rRNA-processing protein TSR4
LmxM.21.1270	hypothetical protein, conserved OS=Leishmania_mexicana_MHOM/GT/2001/U1103 GN=LmxM.21.1270	LmxM.21.1270	1.53397	0.0117012	Up	91.917	42	21	21	21	555970	532450	558820	263120	300210	260450	472250	465260	459480	584930	558000	560370	469420	506310	493680	316280	288750	295610	1.26017	1.20686	1.26663	0.596392	0.68046	0.59034	1.07041	1.05456	1.04146	1.32581	1.26477	1.27014	1.06399	1.14761	1.11898	0.716885	0.654485	0.670034	nucleus
LmxM.21.1360	hypothetical protein, conserved OS=Leishmania_mexicana_MHOM/GT/2001/U1103 GN=LmxM.21.1360	LmxM.21.1360	1.63422	0.0351206	Up	38.208	56.3	13	13	13	380130	371830	383510	121070	128050	127650	321180	312190	319290	360940	367860	357490	409560	412770	405640	901470	862240	903370	0.918899	0.898835	0.927069	0.292666	0.309539	0.308572	0.776397	0.754665	0.771828	0.87251	0.889238	0.86417	0.990041	0.9978	0.980565	2.17915	2.08432	2.18374	extracellular
LmxM.21.1580	Leishmania iron regulator 1 OS=Leishmania_mexicana_MHOM/GT/2001/U1103 GN=LmxM.21.1580	LmxM.21.1580	1.75322	0.0210387	Up	73.302	17.1	8	8	8	124220	106280	127690	52380	42510	54635	116140	125480	116480	132640	158640	153710	121100	115470	122830	209810	183490	207540	0.984551	0.842361	1.01205	0.415157	0.336929	0.43303	0.92051	0.994538	0.923205	1.05129	1.25736	1.21828	0.959822	0.9152	0.973534	1.66293	1.45432	1.64493	plasma membrane
LmxM.22.0210	Nucleolar protein 168, putative OS=Leishmania_mexicana_MHOM/GT/2001/U1103 GN=LmxM.22.0210	LmxM.22.0210	1.61724	6.90266e-05	Up	172.01	29	38	38	38	264530	244100	254180	182820	169950	186440	221070	193890	210050	318650	317510	305250	231130	231220	223340	331360	323840	318900	1.05152	0.970313	1.01038	0.726721	0.675562	0.741111	0.878767	0.770725	0.834962	1.26665	1.26212	1.21339	0.918756	0.919114	0.887791	1.31718	1.28728	1.26765	nucleus
LmxM.22.0370	hypothetical protein, unknown function OS=Leishmania_mexicana_MHOM/GT/2001/U1103 GN=LmxM.22.0370	LmxM.22.0370	1.52861	0.0107659	Up	29.288	17.2	3	3	3	31672	22315	53022	21013	20954	0	15752	0	0	29990	29142	29098	19824	27466	28338	0	0	28035	1.15455	0.813455	1.93283	0.765992	0.763842		0.574212			1.09323	1.06232	1.06072	0.72265	1.00123	1.03301			1.02197	nucleus
LmxM.22.0760	hypothetical protein, conserved OS=Leishmania_mexicana_MHOM/GT/2001/U1103 GN=LmxM.22.0760	LmxM.22.0760	1.78707	0.000559008	Up	13.737	70	5	5	5	275010	272660	350030	159600	162750	156120	218300	211270	184610	355850	335320	285150	221780	245840	267520	216140	222130	231560	1.13234	1.12266	1.44123	0.657145	0.670115	0.642816	0.898839	0.869893	0.760122	1.46519	1.38066	1.17409	0.913168	1.01223	1.1015	0.889945	0.914609	0.953436	mitochondria
LmxM.22.0790	translation initiation factor SUI1, putative OS=Leishmania_mexicana_MHOM/GT/2001/U1103 GN=LmxM.22.0790	LmxM.22.0790	1.59155	0.0150445	Up	73.935	15.4	7	7	7	40767	33007	31797	24525	22633	32163	36857	23811	20960	48500	34430	45149	20006	22604	20743	111560	84312	67562	1.01722	0.82359	0.793398	0.611947	0.564738	0.80253	0.919655	0.594131	0.522993	1.21017	0.859096	1.12656	0.499189	0.564014	0.517579	2.78364	2.10375	1.6858	cytoplasm
LmxM.22.0860	Protein of unknown function (DUF3184), putative OS=Leishmania_mexicana_MHOM/GT/2001/U1103 GN=LmxM.22.0860	LmxM.22.0860	1.64973	0.014952	Up	150.48	24.5	28	9	10	45087	40419	55943	24764	16494	19349	37525	35824	41325	51950	46293	46340	39572	40854	40484	32598	26817	23101	1.22088	1.09448	1.51484	0.670567	0.446629	0.523938	1.01611	0.970053	1.11901	1.40672	1.25354	1.25481	1.07154	1.10626	1.09624	0.882698	0.726159	0.625536	endoplasmic reticulum
LmxM.23.1470	hypothetical protein, conserved OS=Leishmania_mexicana_MHOM/GT/2001/U1103 GN=LmxM.23.1470	LmxM.23.1470	2.48698	0.00606673	Up	23.818	30.6	3	3	3	41975	54360	74693	0	0	0	0	32721	25763	83101	64437	70635	48881	37308	55106	192500	180350	195990	0.507549	0.657304	0.903165					0.395652	0.311518	1.00483	0.779152	0.854096	0.591054	0.451117	0.666325	2.32765	2.18074	2.36985	nucleus
LmxM.24.0440	Protein of unknown function (DUF3184), putative OS=Leishmania_mexicana_MHOM/GT/2001/U1103 GN=LmxM.24.0440	LmxM.24.0440	1.75543	0.0240579	Up	152.36	28.7	30	3	30	195750	196560	201070	64716	62031	68006	167180	163350	164020	200470	201940	202600	166320	175390	175400	293190	298500	304440	1.06743	1.07184	1.09644	0.352897	0.338255	0.370837	0.911633	0.890748	0.894402	1.09316	1.10118	1.10478	0.906944	0.956402	0.956457	1.59877	1.62772	1.66011	plasma membrane
LmxM.24.0930	hypothetical protein, conserved OS=Leishmania_mexicana_MHOM/GT/2001/U1103 GN=LmxM.24.0930	LmxM.24.0930	1.73499	0.00840265	Up	97.717	12.6	8	8	8	160620	151040	189470	73142	95668	95235	100140	103900	161290	184160	200070	161750	124200	146340	132140	93417	61949	100630	1.2381	1.16425	1.46048	0.563797	0.737433	0.734095	0.771904	0.800887	1.24326	1.41955	1.54219	1.24681	0.957364	1.12803	1.01857	0.720081	0.477518	0.775681	extracellular
LmxM.24.1340	translation initiation factor IF-2, putative OS=Leishmania_mexicana_MHOM/GT/2001/U1103 GN=LmxM.24.1340	LmxM.24.1340	1.97242	0.00166866	Up	99.162	10.4	6	5	6	337510	236920	224480	0	191130	163750	181110	164330	155390	245540	408470	358680	384250	231000	255060	106600	0	118170	1.4353	1.00753	0.954627		0.812803	0.696366	0.770191	0.698832	0.660814	1.04419	1.73707	1.52533	1.63407	0.982354	1.08467	0.453329		0.502532	mitochondria	K02519	infB, MTIF2; translation initiation factor IF-2
LmxM.24.1430	kinesin, putative OS=Leishmania_mexicana_MHOM/GT/2001/U1103 GN=LmxM.24.1430	LmxM.24.1430	1.62137	0.029055	Up	343.31	3.9	7	7	7	1518600	1441600	1334600	930720	776080	795500	581900	437160	554170	1123200	880970	1299800	856920	680830	828710	737930	800780	800610	1.66878	1.58417	1.46659	1.02276	0.852831	0.874172	0.639447	0.480393	0.608975	1.23428	0.968094	1.42834	0.941666	0.748161	0.910666	0.810908	0.879974	0.879787	nucleus	K10406	KIFC2_3; kinesin family member C2/C3
LmxM.24.2040	BolA-like protein, putative OS=Leishmania_mexicana_MHOM/GT/2001/U1103 GN=LmxM.24.2040	LmxM.24.2040	1.65139	7.52596e-06	Up	9.5569	31.8	2	2	2	409060	336680	325880	267500	246800	241890	232790	215800	242470	403530	403500	387960	330680	197750	294950	313970	0	331430	1.34179	1.10437	1.06895	0.877449	0.809549	0.793443	0.763593	0.707863	0.795346	1.32365	1.32355	1.27258	1.08469	0.648656	0.96749	1.02988		1.08715	mitochondria	K22075	BOLA3; BolA-like protein 3
LmxM.25.1600	Flagella-associated protein 251, putative OS=Leishmania_mexicana_MHOM/GT/2001/U1103 GN=LmxM.25.1600	LmxM.25.1600	1.94811	0.0111273	Up	126.37	16.3	13	13	13	38251	29914	36372	15700	0	0	28569	29552	27427	49198	48344	50390	18678	20475	18445	57082	59328	53908	1.05224	0.822897	1.00055	0.431887			0.785898	0.812939	0.754483	1.35338	1.32988	1.38617	0.513809	0.563242	0.507399	1.57025	1.63204	1.48294	mitochondria	K24228	WDR66, CFAP251; cilia- and flagella-associated protein 251
LmxM.26.0050	hypothetical protein, conserved OS=Leishmania_mexicana_MHOM/GT/2001/U1103 GN=LmxM.26.0050	LmxM.26.0050	1.95405	0.000268634	Up	28.597	18	3	3	3	106960	80412	68627	56174	45128	51120	40049	37775	45851	77926	92452	99375	52235	66431	48314	44513	63041	55501	1.70095	1.27877	1.09135	0.893318	0.717657	0.812945	0.636887	0.600724	0.729154	1.23923	1.47024	1.58033	0.830677	1.05643	0.768323	0.707876	1.00252	0.882615	nucleus
LmxM.26.0310	6-phosphofructo-2-kinase/fructose-2,6-biphosphatase-1-like protein OS=Leishmania_mexicana_MHOM/GT/2001/U1103 GN=LmxM.26.0310	LmxM.26.0310	1.67497	3.96648e-07	Up	74.342	20.5	9	9	9	55434	51220	50966	55318	54488	55116	51202	53116	50285	88030	93380	86188	53685	49942	56176	68157	65994	59478	0.908609	0.839538	0.835375	0.906708	0.893104	0.903397	0.839243	0.870615	0.824213	1.44288	1.53058	1.41269	0.879942	0.818591	0.920771	1.11715	1.0817	0.974894	cytoplasm,nucleus	K19028	PFKFB1; 6-phosphofructo-2-kinase / fructose-2,6-biphosphatase 1 [EC:2.7.1.105 3.1.3.46]
LmxM.26.0880	40S ribosomal protein S16, putative OS=Leishmania_mexicana_MHOM/GT/2001/U1103 GN=LmxM.26.0880	LmxM.26.0880	1.90853	0.000318198	Up	16.673	73.2	14	14	14	4835300	4938400	4927100	2314000	2272800	2309200	3212800	3249500	3240900	5202300	5307800	5329900	3857600	3775600	3626400	3270400	3400200	3244900	1.27403	1.30119	1.29822	0.609704	0.598849	0.608439	0.846524	0.856194	0.853928	1.37073	1.39853	1.40435	1.01642	0.994814	0.955502	0.861701	0.895901	0.854982	cytoplasm	K02960	RP-S16e, RPS16; small subunit ribosomal protein S16e
LmxM.26.1290	Cupin-like domain containing protein, putative OS=Leishmania_mexicana_MHOM/GT/2001/U1103 GN=LmxM.26.1290	LmxM.26.1290	2.72575	0.000259041	Up	64.91	19.5	7	7	7	39032	41065	41763	0	0	0	24838	30937	32148	82708	79599	77349	24015	23692	22847	121480	124420	121440	0.65982	0.694187	0.705986				0.419876	0.522977	0.543449	1.39814	1.34559	1.30755	0.405964	0.400504	0.386219	2.05357	2.10327	2.05289	extracellular	K19219	JMJD7; peptidyl-lysine (3S)-dioxygenase / protease [EC:1.14.11.63 3.4.-.-]
LmxM.26.1630	40S ribosomal protein S33, putative OS=Leishmania_mexicana_MHOM/GT/2001/U1103 GN=LmxM.26.1630	LmxM.26.1630	1.59471	6.80002e-06	Up	9.7461	55.2	5	5	5	3511600	3923900	3812600	2683700	2710700	2703600	2294300	2366500	2391000	4208100	3909700	3962000	2833000	2917700	2886600	2365500	2255400	2312600	1.16948	1.30679	1.26973	0.893764	0.902756	0.900391	0.76408	0.788125	0.796285	1.40144	1.30206	1.31948	0.943486	0.971694	0.961337	0.787792	0.751125	0.770175	cytoplasm	K02979	RP-S28e, RPS28; small subunit ribosomal protein S28e
LmxM.26.2170	Cornifin (SPRR) family, putative OS=Leishmania_mexicana_MHOM/GT/2001/U1103 GN=LmxM.26.2170	LmxM.26.2170	1.774	0.00257508	Up	396.22	12.1	10	10	10	62736	37596	46060	49656	23743	29310	26639	37193	40890	62901	57414	63676	51653	39574	40965	104250	95847	93122	1.17236	0.702565	0.860733	0.927933	0.443691	0.547722	0.497809	0.695034	0.764121	1.17544	1.07291	1.18993	0.965251	0.739528	0.765522	1.94814	1.79111	1.74019	nucleus
LmxM.26.2320	hypothetical protein, conserved OS=Leishmania_mexicana_MHOM/GT/2001/U1103 GN=LmxM.26.2320	LmxM.26.2320	1.57924	0.0162173	Up	78.991	35	15	15	15	465660	466640	453510	198610	195840	186150	362710	374770	359980	443400	450180	431450	441040	429890	418760	445680	457870	458040	1.19058	1.19308	1.15951	0.507797	0.500714	0.47594	0.92736	0.958194	0.92038	1.13366	1.151	1.10311	1.12763	1.09912	1.07067	1.13949	1.17066	1.1711	mitochondria
LmxM.26.2370	HECT E3 ligase, putative OS=Leishmania_mexicana_MHOM/GT/2001/U1103 GN=LmxM.26.2370	LmxM.26.2370	1.52479	0.00485496	Up	421.88	13.5	37	37	37	149150	158500	156150	100970	105390	93944	114380	139980	144540	178900	185340	168830	142800	146110	153080	206570	218780	204300	0.970006	1.03081	1.01553	0.656665	0.68541	0.610971	0.743877	0.910369	0.940025	1.16349	1.20537	1.098	0.928709	0.950235	0.995565	1.34344	1.42285	1.32868	plasma membrane
LmxM.27.0270	hypothetical protein, conserved OS=Leishmania_mexicana_MHOM/GT/2001/U1103 GN=LmxM.27.0270	LmxM.27.0270	1.68484	0.0256605	Up	118.25	18.7	14	14	14	183550	186920	178140	51704	51832	49182	118000	134020	113780	141910	145630	149270	145930	139650	141190	209600	224630	228160	1.27411	1.29751	1.23656	0.358904	0.359792	0.341397	0.819097	0.9303	0.789804	0.985069	1.01089	1.03616	1.01297	0.969381	0.980071	1.45494	1.55927	1.58377	nucleus
LmxM.27.0690	hypothetical protein, unknown function OS=Leishmania_mexicana_MHOM/GT/2001/U1103 GN=LmxM.27.0690	LmxM.27.0690	2.95377	1.97713e-06	Up	98.423	17.3	10	10	10	133990	112360	98629	53846	58606	59990	61933	44199	55203	153050	167740	172160	90760	92183	73345	103840	97449	109360	1.38719	1.16325	1.0211	0.557462	0.606742	0.621071	0.641186	0.457588	0.571511	1.58451	1.7366	1.78236	0.939629	0.954362	0.759334	1.07505	1.00888	1.13219	nucleus
LmxM.27.1280	hypothetical protein, conserved OS=Leishmania_mexicana_MHOM/GT/2001/U1103 GN=LmxM.27.1280	LmxM.27.1280	1.50992	0.00268167	Up	24.854	32	5	5	5	67665	67125	70956	66698	54765	60483	62681	53108	55417	91719	71447	103450	62865	56457	76340	58863	57211	48531	1.02715	1.01895	1.0771	1.01247	0.831326	0.918124	0.951489	0.806172	0.841223	1.39228	1.08456	1.57036	0.954282	0.85701	1.15883	0.893533	0.868455	0.736694	extracellular
LmxM.27.1560	diacylglycerol acyltransferase, putative OS=Leishmania_mexicana_MHOM/GT/2001/U1103 GN=LmxM.27.1560	LmxM.27.1560	1.52852	0.0036164	Up	174.87	7.4	9	9	9	285700	373870	277490	249340	219900	187410	186410	189950	186500	372830	265580	293610	169840	182020	151690	216730	180120	190870	1.23033	1.61002	1.19497	1.07375	0.94697	0.807056	0.802749	0.817994	0.803137	1.60554	1.14368	1.26439	0.731393	0.783844	0.653232	0.933318	0.775662	0.821956	plasma membrane	K14458	MOGAT1, MGAT1; 2-acylglycerol O-acyltransferase 1 [EC:2.3.1.22]
LmxM.27.2500	hypothetical protein, conserved OS=Leishmania_mexicana_MHOM/GT/2001/U1103 GN=LmxM.27.2500	LmxM.27.2500	2.0809	0.0070339	Up	15.356	48.9	4	4	4	74896	45439	44381	64138	56520	24869	51670	45000	46785	97216	115110	88346	44424	55807	58646	45394	47690	46834	1.28007	0.776613	0.758531	1.0962	0.966002	0.425045	0.883109	0.76911	0.799618	1.66155	1.96738	1.50995	0.759266	0.953816	1.00234	0.775844	0.815086	0.800456	nucleus
LmxM.28.1640	hypothetical protein, conserved OS=Leishmania_mexicana_MHOM/GT/2001/U1103 GN=LmxM.28.1640	LmxM.28.1640	1.72373	0.00322901	Up	144.03	10.8	10	10	10	86627	76192	60556	107280	105540	103040	65259	64076	64004	144190	150140	144530	86119	73723	86009	141020	148530	133560	0.847256	0.745197	0.592269	1.04925	1.03223	1.00778	0.638266	0.626696	0.625992	1.41025	1.46845	1.41358	0.842288	0.721048	0.841212	1.37925	1.4527	1.30628	nucleus
LmxM.28.1910	p21-C-terminal region-binding protein, putative OS=Leishmania_mexicana_MHOM/GT/2001/U1103 GN=LmxM.28.1910	LmxM.28.1910	2.77328	0.00110413	Up	71.833	23.4	11	11	11	460900	421700	410730	136760	91361	99377	190290	233360	232310	484030	454240	425430	370190	312570	333540	678760	685870	615850	1.24994	1.14363	1.11388	0.370888	0.247767	0.269506	0.516059	0.632863	0.630015	1.31267	1.23188	1.15375	1.00394	0.847677	0.904547	1.84077	1.86005	1.67016	nucleus
LmxM.28.1930	Zinc transporter 3, putative OS=Leishmania_mexicana_MHOM/GT/2001/U1103 GN=LmxM.28.1930	LmxM.28.1930	3.12879	4.5688e-09	Up	46.892	6.4	2	2	2	289290	301000	293160	190740	172650	180690	171240	193850	171830	558100	563830	569180	290900	271050	276630	147220	160950	158000	1.04978	1.09227	1.06382	0.692158	0.626513	0.655689	0.621397	0.703444	0.623538	2.02524	2.04603	2.06544	1.05562	0.983588	1.00384	0.534233	0.584056	0.573351	plasma membrane	K14709	SLC39A1_2_3, ZIP1_2_3; solute carrier family 39 (zinc transporter), member 1/2/3
LmxM.28.1950	X-pro, dipeptidyl-peptidase,serine peptidase, Clan SC, family S15, putative OS=Leishmania_mexicana_MHOM/GT/2001/U1103 GN=LmxM.28.1950	LmxM.28.1950	1.58673	0.00541315	Up	76.108	34.3	16	16	16	174270	154670	161130	112830	108980	109860	169310	176880	182150	224790	228620	228890	190360	187300	193340	249840	256680	250570	0.933459	0.828473	0.863076	0.604362	0.58374	0.588453	0.906891	0.947439	0.975667	1.20406	1.22458	1.22602	1.01964	1.00325	1.03561	1.33824	1.37488	1.34215	cytoplasm	K06978	K06978; uncharacterized protein
LmxM.28.2330	Cactus-binding C-terminus of cactin protein, putative OS=Leishmania_mexicana_MHOM/GT/2001/U1103 GN=LmxM.28.2330	LmxM.28.2330	1.80284	0.0077698	Up	77.222	26.5	13	13	13	71645	76103	75864	35743	38164	33834	67069	72442	71515	92504	98723	96116	65590	58878	64150	100790	113720	120790	0.952698	1.01198	1.0088	0.475292	0.507485	0.449907	0.891849	0.963296	0.950969	1.23007	1.31277	1.2781	0.872182	0.782929	0.853033	1.34025	1.51219	1.6062	nucleus
LmxM.28.2730	hypothetical protein, conserved OS=Leishmania_mexicana_MHOM/GT/2001/U1103 GN=LmxM.28.2730	LmxM.28.2730	1.54554	0.013876	Up	65.743	33.2	14	14	14	197110	178910	201370	90380	97266	93259	166190	166250	168050	207660	202290	193890	137370	140000	145110	346610	281310	301710	1.07037	0.971535	1.0935	0.49079	0.528183	0.506424	0.902461	0.902787	0.912562	1.12766	1.0985	1.05288	0.74596	0.760242	0.787991	1.8822	1.5276	1.63838	mitochondria
LmxM.29.0430	quiescin sulfhydryl oxidase, putative OS=Leishmania_mexicana_MHOM/GT/2001/U1103 GN=LmxM.29.0430	LmxM.29.0430	1.66212	0.000106008	Up	62.457	27.5	12	12	12	349970	362170	383610	292900	290110	257090	300560	344860	339080	497980	501010	517360	331660	325380	321810	255270	293950	280400	1.00869	1.04386	1.10565	0.844204	0.836163	0.740992	0.866282	0.993965	0.977306	1.43529	1.44402	1.49115	0.95592	0.937819	0.92753	0.735746	0.847231	0.808177	plasma membrane	K10758	QSOX; thiol oxidase [EC:1.8.3.2]
LmxM.29.1010	ubiquitin fusion degradation protein 2, putative OS=Leishmania_mexicana_MHOM/GT/2001/U1103 GN=LmxM.29.1010	LmxM.29.1010	2.01054	9.70124e-05	Up	114.74	31.9	23	23	23	293200	261640	257170	144050	149870	151070	212030	197020	197270	340270	361470	355110	224030	218230	206830	332240	323510	302760	1.16561	1.04014	1.02237	0.572666	0.595803	0.600574	0.842918	0.783246	0.78424	1.35273	1.43701	1.41173	0.890624	0.867566	0.822246	1.32081	1.2861	1.20361	cytoplasm	K03671	trxA; thioredoxin 1
LmxM.29.1770	Intraflagellar transport complex B protein 46 C terminal, putative OS=Leishmania_mexicana_MHOM/GT/2001/U1103 GN=LmxM.29.1770	LmxM.29.1770	1.84127	0.0344592	Up	39.92	27.6	6	6	6	81901	70601	60278	0	0	0	65471	82032	46607	133480	129570	94359	81065	81897	0	299290	256770	281860	0.649573	0.559951	0.478077				0.519263	0.650612	0.369649	1.05866	1.02765	0.74838	0.642943	0.649541		2.37373	2.03649	2.23549	cytoskeleton	K19682	IFT46; intraflagellar transport protein 46
LmxM.29.2570	hypothetical protein, conserved OS=Leishmania_mexicana_MHOM/GT/2001/U1103 GN=LmxM.29.2570	LmxM.29.2570	1.67456	0.0450933	Up	46.133	52.8	16	16	16	262460	252300	258060	61189	52989	54929	171000	174070	169380	195160	190270	186900	263250	272290	261680	371220	382330	377070	1.19404	1.14782	1.17402	0.278375	0.241069	0.249895	0.777951	0.791918	0.770581	0.887865	0.865618	0.850287	1.19764	1.23876	1.19049	1.68884	1.73938	1.71545	cytoplasm,nucleus
LmxM.29.3040	eukaryotic translation initiation factor 3 subunit d OS=Leishmania_mexicana_MHOM/GT/2001/U1103 GN=LmxM.29.3040	LmxM.29.3040	1.6017	0.00903185	Up	60.577	33.9	17	17	17	800750	887970	812230	794990	436350	718300	735800	767010	761310	1169200	1059600	1145800	678870	681560	705430	1302700	1150800	1185400	0.912589	1.01199	0.925673	0.906025	0.497294	0.818624	0.838568	0.874137	0.867641	1.3325	1.20759	1.30583	0.773687	0.776752	0.803956	1.48465	1.31153	1.35096	nucleus
LmxM.29.3500	S-adenosylmethionine synthetase OS=Leishmania_mexicana_MHOM/GT/2001/U1103 GN=LmxM.29.3500	LmxM.29.3500	1.50453	0.00121817	Up	43.128	64.5	30	30	30	3782300	3628700	3819600	3417500	3375700	3385900	2541200	2513500	2472300	4593200	4374000	4352500	3400800	3487200	3417900	3274900	3235700	3233400	1.09269	1.04831	1.10346	0.9873	0.975224	0.978171	0.734141	0.726138	0.714236	1.32695	1.26363	1.25742	0.982475	1.00744	0.987415	0.946103	0.934779	0.934114	cytoplasm	K00789	metK, MAT; S-adenosylmethionine synthetase [EC:2.5.1.6]
LmxM.29.3580	serine/threonine-protein kinase, putative OS=Leishmania_mexicana_MHOM/GT/2001/U1103 GN=LmxM.29.3580	LmxM.29.3580	1.65413	0.00855769	Up	84.682	21.1	12	12	12	341740	331690	277020	111810	117660	125390	232780	160490	218480	269750	265900	263800	233850	202430	217840	454170	245080	376450	1.38346	1.34277	1.12146	0.452638	0.476321	0.507614	0.942359	0.649709	0.884469	1.09202	1.07644	1.06794	0.946691	0.819494	0.881878	1.83861	0.992153	1.52398	cytoplasm	K08832	SRPK3, STK23; serine/threonine-protein kinase SRPK3 [EC:2.7.11.1]
LmxM.30.0390	Calpain-like protein 2 OS=Leishmania_mexicana_MHOM/GT/2001/U1103 GN=LmxM.30.0390	LmxM.30.0390	1.64368	0.0136447	Up	89.335	58.5	32	32	32	908030	874320	863150	285880	274620	282270	559290	545080	529760	662910	690860	681840	778070	758810	760810	1567600	1533800	1521700	1.16093	1.11783	1.10355	0.365503	0.351107	0.360887	0.715062	0.696895	0.677308	0.847542	0.883277	0.871745	0.994777	0.970152	0.972709	2.0042	1.96099	1.94552	cytoplasm	K08582	CAPN15; calpain-15 [EC:3.4.22.-]
LmxM.30.0740	Tir chaperone protein (CesT) family, putative OS=Leishmania_mexicana_MHOM/GT/2001/U1103 GN=LmxM.30.0740	LmxM.30.0740	1.56135	3.87626e-05	Up	36.613	61.6	14	14	14	365870	378250	351020	255450	264550	250640	231250	231660	217750	401390	371930	359670	359910	350080	371580	335170	257970	288110	1.1672	1.2067	1.11983	0.814941	0.843972	0.799596	0.737738	0.739046	0.69467	1.28052	1.18654	1.14743	1.14819	1.11683	1.18542	1.06926	0.82298	0.919133	nucleus
LmxM.30.1190	cytochrome b5-like Heme/Steroid binding domain containing protein, putative OS=Leishmania_mexicana_MHOM/GT/2001/U1103 GN=LmxM.30.1190	LmxM.30.1190	2.26615	3.09972e-07	Up	14.981	59.2	6	6	6	162000	154290	153500	89549	81701	85576	93205	101070	88536	205090	202220	204140	132550	133600	119860	170730	177950	186850	1.14694	1.09235	1.08676	0.633996	0.578433	0.605868	0.65988	0.715563	0.626824	1.45201	1.43169	1.44529	0.938438	0.945872	0.848594	1.20875	1.25986	1.32288	cytoplasm	K23490	CYB5; cytochrome b5
LmxM.30.1420	hypothetical protein, conserved OS=Leishmania_mexicana_MHOM/GT/2001/U1103 GN=LmxM.30.1420	LmxM.30.1420	1.60032	0.00678677	Up	123.71	16.6	13	13	13	73159	76027	65122	60763	68705	39783	43819	52009	48123	86755	89699	74157	58485	55890	53799	241410	251990	229970	0.788698	0.819617	0.702055	0.655062	0.740682	0.428885	0.472395	0.560689	0.518795	0.935271	0.96701	0.799457	0.630504	0.602528	0.579986	2.60255	2.7166	2.47922	plasma membrane
LmxM.30.1520	hypothetical protein, conserved OS=Leishmania_mexicana_MHOM/GT/2001/U1103 GN=LmxM.30.1520	LmxM.30.1520	1.64237	3.31408e-07	Up	101.64	10.6	7	7	7	39583	45129	47386	38561	38903	38935	38360	40762	39535	67349	65735	59940	38492	39252	38885	56438	56655	54871	0.843417	0.961588	1.00968	0.82164	0.828928	0.829609	0.817358	0.868538	0.842394	1.43504	1.40065	1.27717	0.82017	0.836364	0.828544	1.20256	1.20718	1.16917	nucleus
LmxM.30.3070	ferrous iron transport protein OS=Leishmania_mexicana_MHOM/GT/2001/U1103 GN=LmxM.30.3070	LmxM.30.3070	2.84991	5.28842e-07	Up	45.957	29.2	11	11	11	429720	499950	475710	280320	284700	219160	273920	261230	243250	760790	721580	744240	398380	384980	401710	629020	632860	659710	0.931785	1.08407	1.03151	0.607833	0.61733	0.475216	0.593955	0.566439	0.527452	1.64966	1.56464	1.61378	0.863829	0.834773	0.871049	1.36394	1.37226	1.43048	plasma membrane
LmxM.31.0270	hypothetical protein, conserved OS=Leishmania_mexicana_MHOM/GT/2001/U1103 GN=LmxM.31.0270	LmxM.31.0270	2.87284	0.000416503	Up	139.77	8.3	9	9	9	140520	185860	125350	80153	98679	159290	99347	180000	183960	356350	413550	381290	172870	155720	77631	427560	417880	373630	0.627689	0.830218	0.559926	0.358035	0.440789	0.711533	0.443773	0.804042	0.821731	1.59178	1.84729	1.70318	0.772193	0.695586	0.34677	1.90987	1.86663	1.66897	plasma membrane
LmxM.31.0470	hypothetical protein, conserved OS=Leishmania_mexicana_MHOM/GT/2001/U1103 GN=LmxM.31.0470	LmxM.31.0470	4.05979	7.11022e-06	Up	96.702	5	3	3	3	1339000	1250300	1368300	0	0	260120	298390	281430	346920	1174400	1242500	1196900	423320	386660	390430	550170	443490	418580	1.88411	1.7593	1.92533			0.366015	0.419864	0.396	0.488151	1.6525	1.74832	1.68416	0.595653	0.544069	0.549374	0.774144	0.624034	0.588984	extracellular
LmxM.31.2380	aquaporin-like protein OS=Leishmania_mexicana_MHOM/GT/2001/U1103 GN=LmxM.31.2380	LmxM.31.2380	1.77974	0.00136279	Up	62.926	7.4	3	3	3	237680	217680	181350	73094	65120	80670	104720	109030	123210	163220	178460	152950	88106	130620	106690	289330	185910	246610	1.56457	1.43292	1.19377	0.481154	0.428664	0.531025	0.689338	0.717709	0.811052	1.07442	1.17474	1.00682	0.579973	0.859829	0.702306	1.90457	1.22379	1.62335	plasma membrane	K09869	AQP8; aquaporin-8
LmxM.31.2610	Tip Of Extending FAZ protein 1 OS=Leishmania_mexicana_MHOM/GT/2001/U1103 GN=LmxM.31.2610	LmxM.31.2610	1.60466	0.0306599	Up	107.17	19.2	12	12	12	126240	119850	127470	125740	137280	125640	54952	56648	56892	145040	151670	150310	94286	99253	99452	66341	60557	69848	1.21679	1.1552	1.22865	1.21197	1.3232	1.21101	0.529667	0.546014	0.548366	1.398	1.4619	1.4488	0.908796	0.956671	0.958589	0.639442	0.583692	0.673245	nucleus
LmxM.31.2730	hypothetical protein, conserved OS=Leishmania_mexicana_MHOM/GT/2001/U1103 GN=LmxM.31.2730	LmxM.31.2730	1.54316	0.00232817	Up	107.49	19.8	11	10	11	274530	327810	264420	236000	200790	172950	210310	236250	203570	0	321680	326380	219760	222600	227290	174650	166730	166480	1.18086	1.41004	1.13738	1.01513	0.863678	0.743927	0.904628	1.01621	0.875636		1.38367	1.40389	0.945276	0.957492	0.977666	0.75124	0.717173	0.716097	nucleus
LmxM.31.2810	RNA-binding protein, putative OS=Leishmania_mexicana_MHOM/GT/2001/U1103 GN=LmxM.31.2810	LmxM.31.2810	1.89724	0.0022202	Up	51.071	20.3	6	6	6	39444	47716	52050	35938	39624	47570	60184	31076	45872	84965	76547	85380	56052	55824	60339	145330	121420	126110	0.586072	0.70898	0.773376	0.533979	0.588747	0.706811	0.894234	0.461738	0.681582	1.26244	1.13736	1.2686	0.83284	0.829452	0.896537	2.15936	1.8041	1.87379	nucleus	K14573	NOP4, RBM28; nucleolar protein 4
LmxM.31.3650	hypothetical protein OS=Leishmania_mexicana_MHOM/GT/2001/U1103 GN=LmxM.31.3650	LmxM.31.3650	2.45152	1.92005e-06	Up	39.133	64.1	17	17	17	447830	407960	403420	94397	89750	88635	111220	108880	112350	253360	242160	246350	368490	369120	365920	952640	942490	970040	1.226	1.11685	1.10442	0.258425	0.245703	0.242651	0.30448	0.298074	0.307574	0.693608	0.662946	0.674417	1.00879	1.01052	1.00176	2.60798	2.5802	2.65562	mitochondria	K05605	HIBCH; 3-hydroxyisobutyryl-CoA hydrolase [EC:3.1.2.4]
LmxM.31.3820	hypothetical protein, conserved OS=Leishmania_mexicana_MHOM/GT/2001/U1103 GN=LmxM.31.3820	LmxM.31.3820	1.65706	0.0172475	Up	38.997	43.5	11	11	11	46671	50930	65336	39467	48444	38829	44210	54740	33477	53104	64557	97066	39236	42624	43260	0	34902	0	0.937106	1.02262	1.31188	0.792457	0.972706	0.779647	0.887692	1.09912	0.672184	1.06627	1.29624	1.94899	0.787819	0.855847	0.868617		0.700797		cytoplasm,nucleus
LmxM.31.3930	HECT E3 ligase, putative OS=Leishmania_mexicana_MHOM/GT/2001/U1103 GN=LmxM.31.3930	LmxM.31.3930	1.63818	9.42831e-05	Up	453.87	18.1	48	48	48	108560	106420	100460	59204	55806	48499	60581	62682	64936	95747	97579	94755	107480	106870	108010	110950	107610	104610	1.22072	1.19666	1.12964	0.665729	0.62752	0.545355	0.681213	0.704838	0.730184	1.07664	1.09724	1.06549	1.20858	1.20172	1.21454	1.2476	1.21004	1.1763	plasma membrane	K12233	HECTD3; E3 ubiquitin-protein ligase HECTD3 [EC:2.3.2.26]
LmxM.31.3990	GIPL galf transferase, putative OS=Leishmania_mexicana_MHOM/GT/2001/U1103 GN=LmxM.31.3990	LmxM.31.3990	2.39603	0.00159103	Up	67.083	11.7	5	5	5	78412	71895	75597	63561	66945	44763	38899	31529	36753	112870	107980	117530	48060	53871	54973	61995	73030	70942	1.16684	1.06986	1.12495	0.945844	0.996201	0.666113	0.578852	0.46918	0.546917	1.67961	1.60684	1.74895	0.715176	0.801648	0.818047	0.922541	1.08675	1.05568	Golgi apparatus
LmxM.32.0312	heat shock protein 83-1 OS=Leishmania_mexicana_MHOM/GT/2001/U1103 GN=LmxM.32.0312	LmxM.32.0312	2.46548	0.0085262	Up	80.572	63.1	49	49	49	2781600	2697700	2630900	852330	781950	819370	2539200	2516300	2470000	4185100	4071600	4045000	2203200	2187000	2134700	5429100	5327900	5363100	0.944052	0.915577	0.892906	0.289274	0.265387	0.278087	0.861784	0.854012	0.838298	1.42039	1.38187	1.37284	0.747748	0.74225	0.7245	1.84259	1.80825	1.82019	cytoplasm	K04079	HSP90A, htpG; molecular chaperone HtpG
LmxM.32.0380	hypothetical protein, conserved OS=Leishmania_mexicana_MHOM/GT/2001/U1103 GN=LmxM.32.0380	LmxM.32.0380	2.00246	0.00264047	Up	48.166	15.1	5	5	5	45297	49164	56774	30677	36386	24875	17972	32156	26074	60638	47844	59865	28500	30942	39969	18066	27895	23881	1.24106	1.34701	1.55551	0.840498	0.996915	0.681533	0.492402	0.88102	0.714383	1.66138	1.31084	1.6402	0.780852	0.847758	1.09508	0.494978	0.764276	0.654299	mitochondria
LmxM.32.0550	hypothetical protein, conserved OS=Leishmania_mexicana_MHOM/GT/2001/U1103 GN=LmxM.32.0550	LmxM.32.0550	3.15396	0.00671213	Up	225.98	18.6	27	27	27	85089	59879	66495	19785	12965	9439.4	50236	47456	51487	100360	107380	94044	60969	58503	53555	94355	92771	94865	1.32076	0.929451	1.03215	0.307106	0.201245	0.14652	0.779771	0.736619	0.799189	1.5578	1.66677	1.45976	0.94637	0.908092	0.831289	1.46459	1.44001	1.47251	nucleus
LmxM.32.0570	hypothetical protein, conserved OS=Leishmania_mexicana_MHOM/GT/2001/U1103 GN=LmxM.32.0570	LmxM.32.0570	2.2401	0.0142835	Up	63.634	65.8	25	25	25	193090	196640	190510	72572	72801	71791	239620	232480	236080	338740	355370	342320	189350	191560	183130	455370	447420	456160	0.778414	0.792725	0.768013	0.292563	0.293486	0.289415	0.965992	0.937209	0.951721	1.36558	1.43262	1.38001	0.763336	0.772246	0.738261	1.83576	1.80371	1.83894	nucleus
LmxM.32.0970	hypothetical protein, conserved OS=Leishmania_mexicana_MHOM/GT/2001/U1103 GN=LmxM.32.0970	LmxM.32.0970	1.52675	2.22243e-05	Up	67.007	33.3	17	17	17	246050	223880	215780	152740	152080	131480	149390	147900	159810	237160	217180	227660	173180	183280	174830	166980	163970	157510	1.34992	1.22829	1.18385	0.837988	0.834367	0.721347	0.819608	0.811434	0.876776	1.30115	1.19153	1.24903	0.950129	1.00554	0.959181	0.916113	0.899599	0.864158	nucleus
LmxM.32.1850	hypothetical protein, unknown function OS=Leishmania_mexicana_MHOM/GT/2001/U1103 GN=LmxM.32.1850	LmxM.32.1850	1.7609	0.000104282	Up	26.858	9.4	3	3	3	25991	22590	24550	23145	22038	18782	26383	24472	25312	41106	41685	40588	24003	21975	23042	24289	24623	21197	0.983326	0.854655	0.928808	0.875652	0.833771	0.710586	0.998157	0.925857	0.957637	1.55518	1.57708	1.53558	0.908113	0.831387	0.871756	0.918934	0.93157	0.801953	nucleus
LmxM.32.2450	hypothetical protein, conserved OS=Leishmania_mexicana_MHOM/GT/2001/U1103 GN=LmxM.32.2450	LmxM.32.2450	1.54839	0.00721139	Up	169.1	16.7	16	16	16	80647	80158	77559	47398	47844	38688	65396	74117	69872	87540	89359	88894	81448	81683	78244	76997	80221	72539	1.1009	1.09422	1.05874	0.647021	0.653109	0.528122	0.892708	1.01176	0.953809	1.19499	1.21982	1.21347	1.11183	1.11504	1.06809	1.05107	1.09508	0.990215	nucleus
LmxM.32.3070	Flagellar Member 8 OS=Leishmania_mexicana_MHOM/GT/2001/U1103 GN=LmxM.32.3070	LmxM.32.3070	1.51543	0.000163396	Up	91.036	30.2	9	4	9	1317600	1148300	1133000	704890	688570	674790	844290	804530	751640	1185300	1068700	1132000	969100	1054100	957010	1069700	941800	898060	1.36748	1.19177	1.1759	0.731577	0.714639	0.700338	0.876255	0.834989	0.780097	1.23018	1.10916	1.17486	1.00579	1.09401	0.993242	1.1102	0.977457	0.932061	nucleus
LmxM.32.3070partial	hypothetical protein OS=Leishmania_mexicana_MHOM/GT/2001/U1103 GN=LmxM.32.3070partial	LmxM.32.3070partial	1.70537	0.0151748	Up	96.46	42.4	8	3	3	401720	421390	416000	128340	140170	150870	282440	284640	309560	355760	382910	366430	343650	344850	343260	303720	323330	288830	1.29405	1.35741	1.34005	0.413417	0.451524	0.485992	0.909814	0.9169	0.997174	1.146	1.23345	1.18037	1.10699	1.11085	1.10573	0.978362	1.04153	0.930397	extracellular
LmxM.33.0190	Domain of unknown function (DUF1935), putative OS=Leishmania_mexicana_MHOM/GT/2001/U1103 GN=LmxM.33.0190	LmxM.33.0190	1.52287	0.00362473	Up	55.984	57	21	21	21	1202100	1383000	1349100	668790	656770	662360	981300	963780	970380	1227800	1251100	1254700	1546600	1493400	1451300	2561000	2534100	2555600	0.875557	1.00732	0.982625	0.487117	0.478363	0.482434	0.714736	0.701975	0.706782	0.894276	0.911247	0.913869	1.12648	1.08773	1.05706	1.86532	1.84573	1.86139	cytoplasm
LmxM.33.0220	emp24/gp25L/p24 family/GOLD, putative OS=Leishmania_mexicana_MHOM/GT/2001/U1103 GN=LmxM.33.0220	LmxM.33.0220	1.6607	4.03911e-05	Up	38.752	21.9	5	5	5	56736	49376	49225	41313	40051	34682	35113	36122	38226	66258	55855	65137	57587	53198	53662	66732	64679	66934	1.09707	0.954755	0.951835	0.798845	0.774443	0.670626	0.67896	0.69847	0.739154	1.28119	1.08004	1.25952	1.11353	1.02866	1.03763	1.29036	1.25066	1.29426	extracellular
LmxM.33.0300	hypothetical protein, conserved OS=Leishmania_mexicana_MHOM/GT/2001/U1103 GN=LmxM.33.0300	LmxM.33.0300	1.53512	4.07468e-06	Up	80.996	50.1	28	28	28	172740	170370	172390	165050	158510	158980	150060	143460	150330	238100	245230	227730	162770	159010	159370	213010	206140	206440	0.95387	0.940783	0.951937	0.911406	0.875292	0.877887	0.828631	0.792186	0.830122	1.31479	1.35416	1.25752	0.898816	0.878053	0.880041	1.17624	1.1383	1.13996	nucleus	K14793	RRP9; ribosomal RNA-processing protein 9
LmxM.33.2080	hypothetical protein, conserved OS=Leishmania_mexicana_MHOM/GT/2001/U1103 GN=LmxM.33.2080	LmxM.33.2080	1.51167	0.0220183	Up	206.24	9.7	13	13	13	61359	54997	60127	23993	27005	24906	50314	42213	49133	57414	53455	53573	50130	53259	53984	61493	51394	60625	1.24184	1.11308	1.21691	0.485593	0.546553	0.504071	1.0183	0.854347	0.994401	1.162	1.08187	1.08426	1.01458	1.07791	1.09258	1.24455	1.04016	1.22699	nucleus
LmxM.33.2150	eukaryotic translation initiation factor 2-alpha kinase 2 OS=Leishmania_mexicana_MHOM/GT/2001/U1103 GN=LmxM.33.2150	LmxM.33.2150	1.82539	0.0015496	Up	159.43	10.1	10	10	10	138990	135960	130030	58141	51392	61711	90731	91821	81672	131300	135220	130930	100570	108930	98529	144890	141270	144960	1.26543	1.23785	1.18386	0.529344	0.467898	0.561847	0.826059	0.835983	0.743582	1.19542	1.23111	1.19205	0.915638	0.991752	0.897056	1.31915	1.28619	1.31979	plasma membrane	K16195	EIF2AK2; eukaryotic translation initiation factor 2-alpha kinase 2 [EC:2.7.11.1]
LmxM.33.2700	eukaryotic translation initiation factor 3 subunit g OS=Leishmania_mexicana_MHOM/GT/2001/U1103 GN=LmxM.33.2700	LmxM.33.2700	1.93234	2.64954e-06	Up	28.848	36.5	7	7	7	1060000	930140	976260	689010	679230	645110	812440	809900	763430	1387500	1465600	1397200	904750	869870	856250	1295600	1257000	1277100	1.05552	0.926209	0.972134	0.686098	0.67636	0.642384	0.809007	0.806477	0.760204	1.38164	1.45941	1.3913	0.900927	0.866194	0.852632	1.29012	1.25169	1.2717	nucleus	K13126	PABPC; polyadenylate-binding protein
LmxM.33.2860	hypothetical protein, conserved OS=Leishmania_mexicana_MHOM/GT/2001/U1103 GN=LmxM.33.2860	LmxM.33.2860	1.54573	0.0307706	Up	13.53	29.7	3	3	3	105110	99579	103090	51375	0	0	85955	89939	81918	120900	117180	120360	101550	94344	95288	104390	109540	121160	1.05	0.994747	1.02982	0.513212			0.858649	0.898448	0.818322	1.20773	1.17057	1.20234	1.01444	0.942452	0.951882	1.04281	1.09425	1.21033	mitochondria
LmxM.33.4140	hypothetical protein, conserved OS=Leishmania_mexicana_MHOM/GT/2001/U1103 GN=LmxM.33.4140	LmxM.33.4140	1.59436	0.00150835	Up	50.957	5.6	2	2	2	100350	87970	95551	52616	43432	37987	39540	0	45620	76858	68472	64356	54345	48885	48699	45782	53360	43669	1.69326	1.48437	1.61229	0.88782	0.732853	0.640977	0.667181		0.769773	1.29687	1.15537	1.08592	0.916995	0.824865	0.821727	0.772506	0.900374	0.736853	nucleus
LmxM.33.4260	Unc104-like kinesin, putative OS=Leishmania_mexicana_MHOM/GT/2001/U1103 GN=LmxM.33.4260	LmxM.33.4260	1.59753	0.032574	Up	162.6	16.6	18	17	17	132340	128530	118590	40749	45269	43705	117150	93731	85509	117460	124670	98235	133490	129240	126540	185110	179920	174130	1.14836	1.1153	1.02905	0.353593	0.392815	0.379243	1.01655	0.813336	0.741991	1.01924	1.0818	0.852419	1.15834	1.12146	1.09803	1.60626	1.56123	1.51099	nucleus	K10392	KIF1; kinesin family member 1
LmxM.34.1090	Nucleolar protein 111, putative OS=Leishmania_mexicana_MHOM/GT/2001/U1103 GN=LmxM.34.1090	LmxM.34.1090	1.68386	0.012314	Up	114.9	9.1	6	6	6	85493	93592	85278	57642	40694	45957	76649	51572	0	91569	102920	80837	64662	57494	68298	67805	31060	62921	1.24813	1.36637	1.245	0.84153	0.594102	0.670938	1.11902	0.752913		1.33684	1.50256	1.18016	0.944017	0.83937	0.9971	0.989902	0.453453	0.9186	nucleus	K14786	KRI1; protein KRI1
LmxM.34.1610	hypothetical protein, conserved OS=Leishmania_mexicana_MHOM/GT/2001/U1103 GN=LmxM.34.1610	LmxM.34.1610	1.80353	0.0158164	Up	103.63	5.2	3	3	3	62251	62655	62314	29647	33410	23347	0	50070	46198	66603	63461	67609	54636	53660	47574	0	42025	0	1.21987	1.22779	1.22111	0.580964	0.654704	0.457509		0.981175	0.905299	1.30516	1.24359	1.32487	1.07065	1.05152	0.932263		0.823524		plasma membrane
LmxM.34.1620	Concanavalin A-like lectin/glucanases superfamily, putative OS=Leishmania_mexicana_MHOM/GT/2001/U1103 GN=LmxM.34.1620	LmxM.34.1620	1.6089	0.0114	Up	212.26	12.3	18	18	18	61283	67161	64101	27802	25869	24062	44399	46486	49253	58276	56953	60037	69288	71433	69602	78797	77941	68669	1.07997	1.18356	1.12963	0.489945	0.455881	0.424037	0.782429	0.819207	0.867969	1.02698	1.00366	1.05801	1.22104	1.25884	1.22657	1.38861	1.37353	1.21013	plasma membrane
LmxM.34.4350	PGAP1-like protein, putative OS=Leishmania_mexicana_MHOM/GT/2001/U1103 GN=LmxM.34.4350	LmxM.34.4350	1.67717	0.0362968	Up	145.75	7.1	7	7	7	72169	71357	70119	50615	32708	31795	64966	57765	62539	72984	106560	72357	68600	67760	65237	92666	103250	95070	1.0322	1.02059	1.00288	0.723923	0.467808	0.45475	0.929179	0.826187	0.894467	1.04386	1.52408	1.03489	0.981155	0.969141	0.933055	1.32536	1.47674	1.35974	plasma membrane
LmxM.34.4380	hypothetical protein, conserved OS=Leishmania_mexicana_MHOM/GT/2001/U1103 GN=LmxM.34.4380	LmxM.34.4380	1.7083	0.0120499	Up	58.182	21.2	7	7	7	1578000	1054200	1189700	576760	583890	633270	1111900	1211300	1266600	1608500	1520400	1469600	1321900	1318900	1286600	2223900	2229200	2076600	1.17076	0.782137	0.882668	0.427913	0.433202	0.469839	0.824946	0.898693	0.939722	1.19339	1.12802	1.09033	0.98075	0.978525	0.95456	1.64997	1.6539	1.54068	nucleus
LmxM.34.5070	hypothetical protein, conserved OS=Leishmania_mexicana_MHOM/GT/2001/U1103 GN=LmxM.34.5070	LmxM.34.5070	2.15449	0.000554487	Up	19.208	29.8	4	4	4	85537	83768	84368	32359	34552	28264	47511	50813	51905	89622	84573	90165	51466	51421	51907	79592	81827	81101	1.32644	1.29901	1.30831	0.501798	0.535805	0.438296	0.736763	0.787967	0.804901	1.38979	1.31149	1.39821	0.798094	0.797396	0.804932	1.23425	1.26891	1.25765	cytoplasm,nucleus
LmxM.36.0390	hypothetical protein, conserved OS=Leishmania_mexicana_MHOM/GT/2001/U1103 GN=LmxM.36.0390	LmxM.36.0390	1.51128	0.0148238	Up	72.773	15.4	8	8	8	40951	25590	26510	18113	22563	17176	27552	24359	26139	40626	30210	31857	27188	23020	22321	40441	35530	45780	1.40156	0.875827	0.907314	0.619924	0.772227	0.587855	0.942977	0.833695	0.894616	1.39044	1.03395	1.09032	0.930519	0.787867	0.763944	1.38411	1.21603	1.56684	nucleus
LmxM.36.1595	hypothetical protein, conserved OS=Leishmania_mexicana_MHOM/GT/2001/U1103 GN=LmxM.36.1595	LmxM.36.1595	1.67465	0.00787728	Up	12.533	54.5	6	6	6	187280	165370	199330	139510	139800	173940	85984	140010	144440	254960	211120	223610	115320	133800	208590	135880	144520	110700	1.15678	1.02145	1.23121	0.861715	0.863507	1.07438	0.5311	0.864804	0.892167	1.57482	1.30403	1.38118	0.7123	0.826446	1.2884	0.839294	0.892661	0.683764	mitochondria
LmxM.36.1640	universal minicircle sequence binding protein, putative OS=Leishmania_mexicana_MHOM/GT/2001/U1103 GN=LmxM.36.1640	LmxM.36.1640	1.62094	0.0144835	Up	30.848	24.2	4	3	3	1435100	1361000	1323300	1326500	1081700	1304100	691090	582380	670820	1678700	1511700	1394100	973580	729160	850600	870450	708880	873130	1.33385	1.26498	1.22994	1.23292	1.00539	1.2121	0.642334	0.541293	0.623494	1.56027	1.40505	1.29575	0.904894	0.677718	0.79059	0.80904	0.658869	0.811531	extracellular
LmxM.36.1750	hypothetical protein, conserved OS=Leishmania_mexicana_MHOM/GT/2001/U1103 GN=LmxM.36.1750	LmxM.36.1750	2.09435	0.0117484	Up	59.724	31.1	12	12	12	231130	213630	230960	86828	101270	92086	254900	232420	262620	362690	350570	365460	178830	182000	168050	575890	602790	574550	0.821119	0.758948	0.820515	0.308467	0.359774	0.327147	0.905564	0.825701	0.932991	1.2885	1.24544	1.29834	0.635316	0.646578	0.597019	2.04592	2.14149	2.04116	plasma membrane
LmxM.36.1770	hypothetical protein, conserved OS=Leishmania_mexicana_MHOM/GT/2001/U1103 GN=LmxM.36.1770	LmxM.36.1770	1.56401	9.68982e-06	Up	12.156	19.8	2	2	2	183780	187090	203630	315220	326580	315710	275600	319600	328570	498990	476220	495960	478230	390960	413010	256950	286780	228170	0.553087	0.563048	0.612826	0.948656	0.982844	0.950131	0.82942	0.961838	0.988833	1.50171	1.43319	1.49259	1.43924	1.1766	1.24296	0.773292	0.863066	0.686679	mitochondria
LmxM.36.2260	guanylate kinase-like protein OS=Leishmania_mexicana_MHOM/GT/2001/U1103 GN=LmxM.36.2260	LmxM.36.2260	1.67343	0.00800153	Up	36.307	57.5	13	13	13	190310	197120	176490	84531	95925	86529	164040	165650	154180	222780	197440	208030	187650	205450	211770	243840	251860	256040	1.03817	1.07532	0.962779	0.461129	0.523285	0.472029	0.894863	0.903645	0.841075	1.2153	1.07706	1.13483	1.02366	1.12076	1.15524	1.33018	1.37393	1.39674	extracellular	K00942	gmk, GUK1; guanylate kinase [EC:2.7.4.8]
LmxM.36.2370	base J-associated glucosyltransferase OS=Leishmania_mexicana_MHOM/GT/2001/U1103 GN=LmxM.36.2370	LmxM.36.2370	1.573	0.000282213	Up	103	23.6	15	15	15	105810	106590	99990	62896	65528	58717	75567	70301	79223	107420	105600	111200	89236	85550	83606	79320	79114	83510	1.22941	1.23848	1.16179	0.730793	0.761374	0.682237	0.878018	0.816832	0.920497	1.24812	1.22697	1.29204	1.03684	0.994011	0.971424	0.921624	0.919231	0.970308	plasma membrane
LmxM.36.2470	acid phosphatase, putative OS=Leishmania_mexicana_MHOM/GT/2001/U1103 GN=LmxM.36.2470	LmxM.36.2470	1.91195	0.012855	Up	50.995	28.8	10	10	10	191130	196430	189310	81952	60678	55359	148280	159400	147780	208340	198430	217910	132090	142310	132270	432640	395500	440570	0.974496	1.00152	0.965216	0.417841	0.309373	0.282254	0.756021	0.812717	0.753472	1.06224	1.01172	1.11104	0.673474	0.725582	0.674392	2.20586	2.0165	2.24629	mitochondria	K19283	ACPP; prostatic acid phosphatase [EC:3.1.3.2 3.1.3.5]
LmxM.36.3390	ribosomal protein L29, putative OS=Leishmania_mexicana_MHOM/GT/2001/U1103 GN=LmxM.36.3390	LmxM.36.3390	23.1946	0.00133464	Up	7.9771	32.9	3	3	3	315880	262170	310330	79011	78491	0	0	0	0	1165700	2177800	2136300	359790	394070	389090	124630	128440	130510	0.549206	0.455823	0.539556	0.137373	0.136469					2.02675	3.78644	3.71428	0.62555	0.685151	0.676492	0.216688	0.223313	0.226912	nucleus	K02905	RP-L29e, RPL29; large subunit ribosomal protein L29e
LmxM.36.4060	regulator of chromosome condensation 1-like protein OS=Leishmania_mexicana_MHOM/GT/2001/U1103 GN=LmxM.36.4060	LmxM.36.4060	1.6099	5.52278e-05	Up	74.312	36.4	14	13	14	205250	213450	204130	147170	141440	142150	169290	174820	183500	253450	251290	266700	183880	176150	176690	174910	185450	170600	1.08016	1.12332	1.07427	0.774506	0.744351	0.748088	0.890917	0.920019	0.965699	1.33382	1.32246	1.40355	0.967699	0.927019	0.92986	0.920493	0.975961	0.897811	nucleus	K10615	HERC4; E3 ubiquitin-protein ligase HERC4 [EC:2.3.2.26]
LmxM.36.5160	pre-mRNA-splicing factor CWC22, putative OS=Leishmania_mexicana_MHOM/GT/2001/U1103 GN=LmxM.36.5160	LmxM.36.5160	1.57762	0.000355882	Up	65.329	26.4	13	13	13	5016700	4929600	4794000	3142900	3384000	3344900	4499500	3871000	4196000	5873900	5778800	6046900	4196900	4139100	3876700	3798400	4025700	3694000	1.14873	1.12879	1.09774	0.719666	0.774873	0.76592	1.0303	0.886387	0.960806	1.34501	1.32324	1.38463	0.961012	0.947777	0.887692	0.869763	0.92181	0.845857	nucleus	K13100	CWC22; pre-mRNA-splicing factor CWC22
LmxM.36.5420	branch point binding protein, putative OS=Leishmania_mexicana_MHOM/GT/2001/U1103 GN=LmxM.36.5420	LmxM.36.5420	1.68645	0.000559689	Up	32.772	61.2	14	14	14	325420	330670	333020	248600	250450	262280	335160	356430	358110	493320	519430	514360	318160	319780	312340	445160	425140	430400	0.890446	0.904812	0.911242	0.680244	0.685306	0.717676	0.917098	0.975299	0.979896	1.34987	1.42132	1.40744	0.870581	0.875013	0.854655	1.21809	1.16331	1.1777	cytoplasm,nucleus	K13095	SF1; splicing factor 1
LmxM.36.5700	hypothetical protein, conserved OS=Leishmania_mexicana_MHOM/GT/2001/U1103 GN=LmxM.36.5700	LmxM.36.5700	1.87199	0.0025464	Up	86.158	23.8	12	12	12	122400	140960	153770	79844	74437	68737	119900	116200	92123	171600	160340	184020	135620	138850	152620	176320	209610	205140	0.880403	1.0139	1.10604	0.574305	0.535413	0.494414	0.862421	0.835807	0.662625	1.23429	1.1533	1.32363	0.975492	0.998725	1.09777	1.26824	1.50769	1.47554	cytoplasm
LmxM.36.5800	hypothetical protein, conserved OS=Leishmania_mexicana_MHOM/GT/2001/U1103 GN=LmxM.36.5800	LmxM.36.5800	1.50301	0.0202799	Up	204.54	9.5	13	12	13	172310	169080	189140	160960	133700	136550	127170	82495	131680	176770	183430	220380	169180	182840	183040	154610	285900	230470	1.00384	0.985026	1.10189	0.937721	0.778909	0.795513	0.740867	0.480599	0.767141	1.02983	1.06863	1.28389	0.985609	1.06519	1.06635	0.900727	1.6656	1.34267	extracellular
LmxM.36.6040	COG (conserved oligomeric Golgi) complex component, COG2/Domain of unknown function (DUF3510), putative OS=Leishmania_mexicana_MHOM/GT/2001/U1103 GN=LmxM.36.6040	LmxM.36.6040	1.5619	0.00131315	Up	105.4	20.1	11	11	11	89512	79672	98664	53970	58512	57282	67888	74450	73804	103520	91943	105910	67953	78242	81117	149730	115040	119780	1.02822	0.915192	1.13335	0.619953	0.672127	0.657998	0.779829	0.855207	0.847786	1.18913	1.05615	1.21659	0.780576	0.898766	0.931791	1.71995	1.32146	1.37591	nucleus	K20289	COG2; conserved oligomeric Golgi complex subunit 2
LmxM.36.6080	rab-like GTPase activating protein, putative OS=Leishmania_mexicana_MHOM/GT/2001/U1103 GN=LmxM.36.6080	LmxM.36.6080	2.78078	7.32458e-08	Up	47.656	8.7	2	2	2	124620	131130	109110	48781	42198	39534	42028	41529	40384	119430	116990	117370	102300	93120	82500	73919	0	0	1.50491	1.58352	1.31761	0.589079	0.509583	0.477412	0.50753	0.501504	0.487677	1.44224	1.41277	1.41736	1.23537	1.12452	0.996269	0.892645			nucleus	K19944	TBC1D10; TBC1 domain family member 10
LmxM.36.6480	histidine secretory acid phosphatase, putative OS=Leishmania_mexicana_MHOM/GT/2001/U1103 GN=LmxM.36.6480	LmxM.36.6480	3.58045	0.0110598	Up	127.55	16	13	13	13	358180	333820	306590	16966	13706	17794	113400	111010	107160	233270	192760	254320	144530	162950	156540	563900	475690	490750	1.5906	1.48242	1.3615	0.0753424	0.0608654	0.0790194	0.503585	0.492972	0.475875	1.0359	0.856006	1.12938	0.641827	0.723626	0.695161	2.50416	2.11244	2.17932	nucleus
LmxM.36.6570	y113g7b.23 protein-like protein OS=Leishmania_mexicana_MHOM/GT/2001/U1103 GN=LmxM.36.6570	LmxM.36.6570	1.60009	0.000162017	Up	38.358	31.5	8	8	8	153010	146730	143070	142670	136070	133690	107110	112580	113050	201930	196420	197820	149070	149510	137130	175780	189530	206450	0.986588	0.946096	0.922497	0.919917	0.877362	0.862016	0.690631	0.725901	0.728932	1.30202	1.26649	1.27552	0.961184	0.964021	0.884196	1.13341	1.22206	1.33116	cytoplasm
[truncated: 9 more columns]

## Sheet: DAC3 vs Control Downreg PTN
DAC3-/+ Downregulated proteins compared to Cas9 parasites
Protein accession	Protein description	Gene name	Dac1/control Ratio	Dac1/control P value	Regulated Type	MW [kDa]	Coverage [%]	Peptides	Unique peptides	Razor + unique peptides	LFQ intensity Dac1_1	LFQ intensity Dac1_2	LFQ intensity Dac1_3	LFQ intensity WT_1	LFQ intensity WT_2	LFQ intensity WT_3	LFQ intensity Cas9_1	LFQ intensity Cas9_2	LFQ intensity Cas9_3	LFQ intensity Dac3_1	LFQ intensity Dac3_2	LFQ intensity Dac3_3	LFQ intensity Dac4_1	LFQ intensity Dac4_2	LFQ intensity Dac4_3	LFQ intensity Dac5_1	LFQ intensity Dac5_2	LFQ intensity Dac5_3	Dac1_1	Dac1_2	Dac1_3	WT_1	WT_2	WT_3	Cas9_1	Cas9_2	Cas9_3	Dac3_1	Dac3_2	Dac3_3	Dac4_1	Dac4_2	Dac4_3	Dac5_1	Dac5_2	Dac5_3	Subcellular localization	KEGG KO No.	KEGG Gene
LmxM.01.0500	fatty acyl CoA synthetase 2, putative OS=Leishmania_mexicana_MHOM/GT/2001/U1103 GN=LmxM.01.0500	LmxM.01.0500	0.60568	0.0422381	Down	78.351	40.5	19	18	19	85497	84593	91901	248570	267310	291610	147530	120350	129590	127610	125330	111970	103860	113790	106060	50139	53599	34734	0.670844	0.663751	0.721093	1.95038	2.09742	2.28809	1.15758	0.944315	1.01682	1.00128	0.98339	0.878562	0.814928	0.892843	0.83219	0.393411	0.42056	0.272537	cytoplasm	K01897	ACSL, fadD; long-chain acyl-CoA synthetase [EC:6.2.1.3]
LmxM.01.0600	Rab-GTPase-TBC domain containing protein, putative OS=Leishmania_mexicana_MHOM/GT/2001/U1103 GN=LmxM.01.0600	LmxM.01.0600	0.410515	7.19854e-05	Down	191.19	6.3	7	7	7	22875	0	0	37117	38345	34414	31002	41956	42169	0	16230	14559	26207	24833	25862	33623	32781	0	0.758935			1.23145	1.27219	1.14177	1.02857	1.39199	1.39906		0.53847	0.483031	0.869482	0.823896	0.858036	1.11553	1.08759		plasma membrane	K17544	TBCK; TBC domain-containing protein kinase-like protein
LmxM.02.0460	Mitochondrial outer membrane protein porin, putative OS=Leishmania_mexicana_MHOM/GT/2001/U1103 GN=LmxM.02.0460	LmxM.02.0460	0.613041	6.80826e-08	Down	31.964	63.9	15	15	15	2448700	2536000	2516500	4067500	4163000	4223300	3851900	3845400	3879600	2440800	2493400	2431700	2724900	2656000	2648300	1965900	1962700	1879400	0.835813	0.865611	0.858955	1.38836	1.42095	1.44154	1.31477	1.31255	1.32422	0.833117	0.85107	0.83001	0.930088	0.906571	0.903942	0.671019	0.669927	0.641494	extracellular
LmxM.04.0630	hypothetical protein, conserved OS=Leishmania_mexicana_MHOM/GT/2001/U1103 GN=LmxM.04.0630	LmxM.04.0630	0.564511	5.56869e-05	Down	23.173	35.9	11	11	11	456730	378500	609210	686270	673510	739320	818670	836900	849240	406640	431590	461250	686590	647800	684390	754260	643010	722300	0.715742	0.593148	0.954693	1.07545	1.05546	1.15859	1.28294	1.31151	1.33084	0.637246	0.676345	0.722825	1.07596	1.01517	1.07251	1.182	1.00766	1.13192	endoplasmic reticulum,mitochondria
LmxM.04.0840	tyrosine phospatase-like protein OS=Leishmania_mexicana_MHOM/GT/2001/U1103 GN=LmxM.04.0840	LmxM.04.0840	0.48329	0.00299948	Down	86.733	13.3	7	7	7	128740	117910	109140	174500	195520	236130	128380	145260	131020	98103	67931	78223	88955	107700	115380	108260	49886	90661	1.06705	0.97729	0.9046	1.44633	1.62056	1.95715	1.06407	1.20398	1.08595	0.813121	0.563042	0.648347	0.737298	0.892665	0.95632	0.897307	0.413477	0.751438	nucleus
LmxM.04.0930	hypothetical protein OS=Leishmania_mexicana_MHOM/GT/2001/U1103 GN=LmxM.04.0930	LmxM.04.0930	0.611204	0.0140147	Down	17.224	21.6	2	2	2	29071	21253	31457	52089	61437	71274	38333	45066	41629	29477	33132	32075	29464	0	30814	56886	58120	28763	0.715889	0.523367	0.774646	1.28272	1.51292	1.75516	0.943971	1.10977	1.02514	0.725887	0.815894	0.789864	0.725567		0.758812	1.40085	1.43124	0.708305	extracellular
LmxM.04.1200	hypothetical protein, conserved OS=Leishmania_mexicana_MHOM/GT/2001/U1103 GN=LmxM.04.1200	LmxM.04.1200	0.314892	1.69896e-05	Down	20.805	16.6	2	2	2	0	0	0	104450	97545	103260	81714	97588	92822	34523	26081	0	83109	84558	97964	27849	20333	0				1.42662	1.33231	1.41037	1.11608	1.33289	1.2678	0.471529	0.356224		1.13514	1.15493	1.33803	0.380372	0.277716		nucleus
LmxM.05.1030	hypothetical protein, conserved OS=Leishmania_mexicana_MHOM/GT/2001/U1103 GN=LmxM.05.1030	LmxM.05.1030	0.525879	0.00120459	Down	16.239	35.2	5	5	5	366260	331940	351840	583820	509270	543530	732760	718120	755060	398090	334370	277900	386490	370300	366950	721230	682290	716890	0.720739	0.653203	0.692363	1.14886	1.00216	1.06958	1.44195	1.41314	1.48583	0.783375	0.657985	0.546861	0.760548	0.728689	0.722097	1.41926	1.34263	1.41072	mitochondria
LmxM.06.0160	HD domain containing protein, putative OS=Leishmania_mexicana_MHOM/GT/2001/U1103 GN=LmxM.06.0160	LmxM.06.0160	0.541439	1.16396e-05	Down	51.213	23.6	8	8	8	38622	35266	44431	68322	63470	73407	79291	70722	76257	35549	40660	40598	60881	58993	60109	60660	56382	61632	0.678073	0.619153	0.78006	1.19951	1.11432	1.28878	1.39209	1.24164	1.33882	0.624122	0.713854	0.712765	1.06887	1.03572	1.05531	1.06499	0.98988	1.08205	mitochondria	K22544	SAMHD1; deoxynucleoside triphosphate triphosphohydrolase SAMHD1 [EC:3.1.5.-]
LmxM.06.0470	condensin complex subunit 2, putative OS=Leishmania_mexicana_MHOM/GT/2001/U1103 GN=LmxM.06.0470	LmxM.06.0470	0.421701	0.00867091	Down	120.63	7.1	5	5	5	0	0	0	87987	100630	100270	0	0	0	27474	48329	46021	0	0	0	0	0	0				1.28539	1.47008	1.46483				0.401363	0.706029	0.672312							nucleus
LmxM.06.0530	hypothetical protein, conserved OS=Leishmania_mexicana_MHOM/GT/2001/U1103 GN=LmxM.06.0530	LmxM.06.0530	0.494865	3.58172e-05	Down	31.902	19.2	4	4	4	0	0	18078	39958	37376	36379	44592	38412	44179	19587	20150	0	28146	27346	26914	77885	91183	96596			0.419261	0.926697	0.866816	0.843694	1.03417	0.890842	1.02459	0.454257	0.467314		0.652756	0.634202	0.624183	1.80629	2.1147	2.24023	nucleus
LmxM.06.1260	pteridine transporter, putative OS=Leishmania_mexicana_MHOM/GT/2001/U1103 GN=LmxM.06.1260	LmxM.06.1260	0.640134	0.0103078	Down	71.039	15.7	8	8	8	217460	222590	220330	774320	749680	756940	485630	476750	465030	402710	390660	393550	272280	270840	279520	94114	99376	75985	0.588811	0.602702	0.596582	2.09661	2.02989	2.04955	1.31493	1.29088	1.25915	1.09041	1.05778	1.06561	0.737246	0.733347	0.75685	0.25483	0.269078	0.205743	plasma membrane
LmxM.07.0800	flavoprotein subunit-like protein OS=Leishmania_mexicana_MHOM/GT/2001/U1103 GN=LmxM.07.0800	LmxM.07.0800	0.455507	0.00787174	Down	71.045	72.2	38	38	38	386730	386030	381880	1356400	1334800	1363500	614120	651750	639210	468380	455110	433870	425480	418100	433000	299910	301420	293900	0.654022	0.652838	0.64582	2.29389	2.25736	2.30589	1.03857	1.10221	1.08101	0.792105	0.769663	0.733743	0.719554	0.707073	0.732272	0.507195	0.509749	0.497032	cytoplasm	K14402	CPSF2, CFT2; cleavage and polyadenylation specificity factor subunit 2
LmxM.08.0250	hypothetical protein, conserved OS=Leishmania_mexicana_MHOM/GT/2001/U1103 GN=LmxM.08.0250	LmxM.08.0250	0.411417	0.00672729	Down	12.854	37.2	3	3	3	51294	50015	53906	68694	68311	79625	211080	128520	143070	42228	55338	46286	0	44745	54132	484450	546710	483420	0.333866	0.325541	0.350867	0.44712	0.444627	0.518268	1.37389	0.836519	0.931223	0.274856	0.360187	0.301269		0.291239	0.352338	3.15322	3.55846	3.14651	extracellular
LmxM.08.0340	hypothetical protein, conserved OS=Leishmania_mexicana_MHOM/GT/2001/U1103 GN=LmxM.08.0340	LmxM.08.0340	0.666618	0.0162665	Down	508.61	2.4	6	6	6	15970	0	16948	29159	26519	24232	21255	18111	18821	15006	17735	13288	17271	17885	22955	10168	19266	14972	0.849572		0.901599	1.5512	1.41076	1.28909	1.13072	0.963469	1.00124	0.798289	0.943466	0.706895	0.918782	0.951446	1.22116	0.540917	1.02491	0.79648	plasma membrane
LmxM.08.0490	hypothetical protein, conserved OS=Leishmania_mexicana_MHOM/GT/2001/U1103 GN=LmxM.08.0490	LmxM.08.0490	0.521868	0.0381905	Down	40.655	11.8	3	3	3	0	14310	14862	55826	57233	49570	26201	21860	20288	20072	20108	0	25147	22947	28673	0	0	0		0.493321	0.512351	1.92454	1.97304	1.70887	0.90325	0.753599	0.699406	0.69196	0.693201		0.866915	0.791072	0.98847				nucleus
LmxM.08.0650	DnaJ domain containing protein, putative OS=Leishmania_mexicana_MHOM/GT/2001/U1103 GN=LmxM.08.0650	LmxM.08.0650	0.446011	9.86218e-06	Down	30.847	37.8	7	7	7	0	0	0	85780	81497	89494	71037	70052	71339	32055	37828	34751	33107	24828	23591	0	0	0				1.57068	1.49226	1.63869	1.30073	1.28269	1.30626	0.586945	0.692652	0.636311	0.606208	0.454615	0.431965				nucleus	K09514	DNAJB8; DnaJ homolog subfamily B member 8
LmxM.08.0860	hypothetical protein, unknown function OS=Leishmania_mexicana_MHOM/GT/2001/U1103 GN=LmxM.08.0860	LmxM.08.0860	0.64217	3.4083e-07	Down	32.986	40.3	8	8	8	217330	198330	210930	252400	267070	244120	249450	243720	244680	166240	156470	159380	206410	205570	192650	142120	140720	156340	1.07061	0.977014	1.03908	1.24337	1.31564	1.20258	1.22884	1.20061	1.20534	0.818932	0.770803	0.785138	1.01682	1.01268	0.949033	0.700112	0.693215	0.770163	nucleus
LmxM.08_29.0280	hypothetical protein OS=Leishmania_mexicana_MHOM/GT/2001/U1103 GN=LmxM.08_29.0280	LmxM.08_29.0280	0.373138	0.00380193	Down	53.348	71.5	33	33	33	667080	608540	642840	2294200	2223400	2139100	1010900	985510	980490	624950	586580	585800	667190	646320	650100	680430	657480	685300	0.692622	0.631841	0.667454	2.38204	2.30853	2.221	1.04961	1.02324	1.01803	0.648879	0.60904	0.60823	0.692736	0.671067	0.674992	0.706483	0.682654	0.71154	cytoplasm	K00102	LDHD, dld; D-lactate dehydrogenase (cytochrome) [EC:1.1.2.4]
LmxM.09.0590	ATP-dependent DNA helicase, putative OS=Leishmania_mexicana_MHOM/GT/2001/U1103 GN=LmxM.09.0590	LmxM.09.0590	0.656038	0.0418605	Down	107.31	20.7	12	12	12	117370	122000	112180	252330	255850	306730	130380	158090	171820	121710	149790	146790	69746	98341	111770	78027	164320	97995	0.792672	0.823941	0.757621	1.70414	1.72791	2.07154	0.880536	1.06768	1.16041	0.821983	1.01162	0.991363	0.471038	0.664157	0.754852	0.526964	1.10975	0.661821	nucleus
LmxM.09.0780	Domain of unknown function (DUF4464), putative OS=Leishmania_mexicana_MHOM/GT/2001/U1103 GN=LmxM.09.0780	LmxM.09.0780	0.641179	1.9586e-05	Down	28.419	54.2	11	11	11	96209	95175	95665	119400	117710	123020	126700	125030	125220	78915	70280	87105	126610	120860	125010	97090	95828	86841	0.905417	0.895686	0.900297	1.12367	1.10776	1.15773	1.19237	1.17665	1.17844	0.742664	0.661401	0.81974	1.19152	1.13741	1.17646	0.913708	0.901831	0.817255	nucleus	K25611	CFAP299; cilia- and flagella-associated protein 299
LmxM.09.1420	hypothetical protein, conserved OS=Leishmania_mexicana_MHOM/GT/2001/U1103 GN=LmxM.09.1420	LmxM.09.1420	0.547256	0.000632735	Down	16.297	41	7	7	7	375500	404030	377810	624470	507490	585770	825730	787730	793970	373190	388280	367290	569100	584990	576460	963640	967040	989260	0.611024	0.657449	0.614783	1.01616	0.825802	0.953182	1.34365	1.28182	1.29197	0.607266	0.63182	0.597665	0.926056	0.951913	0.938032	1.56806	1.5736	1.60975	nucleus
LmxM.10.0090	dehydrogenase-like protein OS=Leishmania_mexicana_MHOM/GT/2001/U1103 GN=LmxM.10.0090	LmxM.10.0090	0.329778	0.000123573	Down	44.813	48.8	13	13	13	409090	390140	352690	0	0	0	361530	357740	346870	103140	133440	115010	578460	605560	594350	564520	530290	555970	1.02293	0.975545	0.881901				0.904006	0.894529	0.867348	0.257902	0.333667	0.287583	1.44644	1.5142	1.48617	1.41158	1.32599	1.3902	extracellular	K11153	RDH12; retinol dehydrogenase 12 [EC:1.1.1.300]
LmxM.10.0390	GP63, leishmanolysin OS=Leishmania_mexicana_MHOM/GT/2001/U1103 GN=LmxM.10.0390	LmxM.10.0390	0.501297	6.81892e-07	Down	63.793	42.5	20	5	6	153250	147080	183680	408370	442610	459580	451190	433550	388480	215330	224930	207360	201930	212500	218430	104140	0	0	0.550713	0.528541	0.660065	1.4675	1.59055	1.65153	1.62138	1.55799	1.39603	0.773801	0.808299	0.74516	0.725647	0.763631	0.784941	0.374233			extracellular	K13539	LMLN; leishmanolysin-like peptidase [EC:3.4.24.-]
LmxM.10.0490	mitogen-activated protein kinase OS=Leishmania_mexicana_MHOM/GT/2001/U1103 GN=LmxM.10.0490	LmxM.10.0490	0.356731	2.46546e-05	Down	43.706	50.3	13	13	13	514810	513330	560260	838800	861070	857180	618530	623990	611820	257580	262020	267240	520290	533260	535860	369310	379090	368730	0.976131	0.973325	1.06231	1.59045	1.63267	1.6253	1.17279	1.18315	1.16007	0.488397	0.496816	0.506714	0.986522	1.01111	1.01604	0.700249	0.718793	0.699149	cytoplasm	K04441	P38; p38 MAP kinase [EC:2.7.11.24]
LmxM.10.0670	hypothetical protein, conserved OS=Leishmania_mexicana_MHOM/GT/2001/U1103 GN=LmxM.10.0670	LmxM.10.0670	0.506133	0.00213004	Down	36.402	12	2	2	2	0	0	0	216850	276290	0	323610	248480	281600	128510	144160	0	338070	241550	322080	109960	144670	149480				0.963676	1.22783		1.43811	1.10424	1.25142	0.571095	0.640643		1.50237	1.07344	1.43131	0.488659	0.64291	0.664285	mitochondria
LmxM.16.0570	histone H3 OS=Leishmania_mexicana_MHOM/GT/2001/U1103 GN=LmxM.16.0570	LmxM.16.0570	0.622215	3.28587e-06	Down	14.676	56.2	9	9	9	7981500	9017000	7295800	16181000	16832000	17062000	14702000	15381000	15814000	10310000	9903300	9644300	12141000	11291000	12541000	15430000	15918000	15279000	0.617328	0.697419	0.564293	1.25152	1.30187	1.31966	1.13712	1.18964	1.22313	0.797426	0.765969	0.745937	0.939044	0.873301	0.969982	1.19343	1.23118	1.18175	nucleus	K11253	H3; histone H3
LmxM.11.0840	Alpha/beta hydrolase family, putative OS=Leishmania_mexicana_MHOM/GT/2001/U1103 GN=LmxM.11.0840	LmxM.11.0840	0.483408	0.00228721	Down	45.994	16.6	4	4	4	32876	22719	24895	88812	83640	82390	50433	49511	47888	33405	32043	31880	41679	40786	33172	28356	26874	24684	0.762545	0.526958	0.577429	2.05996	1.94	1.911	1.16977	1.14839	1.11074	0.774815	0.743224	0.739444	0.966727	0.946015	0.769411	0.657706	0.623331	0.572535	cytoplasm	K13696	ABHD1_3; abhydrolase domain-containing protein 1/3
LmxM.11.0860	hypothetical protein, conserved OS=Leishmania_mexicana_MHOM/GT/2001/U1103 GN=LmxM.11.0860	LmxM.11.0860	0.613239	0.0459128	Down	187.73	8.3	12	12	12	29663	30276	21752	54148	53419	64765	36324	34886	41890	34141	17541	35837	33895	32214	29911	27782	29231	33109	0.833251	0.850471	0.611026	1.52105	1.50057	1.81929	1.02036	0.979968	1.17671	0.959041	0.492737	1.00668	0.952131	0.90491	0.840218	0.780413	0.821116	0.930051	plasma membrane
LmxM.13.0610	actyltransferase-like protein OS=Leishmania_mexicana_MHOM/GT/2001/U1103 GN=LmxM.13.0610	LmxM.13.0610	0.550181	0.000152822	Down	29.846	27.6	6	6	6	328450	308080	301430	527300	558110	634430	443320	447110	421750	289080	274610	270390	336490	325780	352500	118100	100820	98507	0.96347	0.903717	0.88421	1.54677	1.63715	1.86103	1.30043	1.31155	1.23715	0.847983	0.805537	0.793158	0.987054	0.955638	1.03402	0.346433	0.295744	0.288959	cytoplasm
LmxM.13.0660	hypothetical protein, conserved OS=Leishmania_mexicana_MHOM/GT/2001/U1103 GN=LmxM.13.0660	LmxM.13.0660	0.618865	0.000140535	Down	75.984	14.1	9	9	9	155060	133050	143890	266010	275580	265340	207280	227720	211990	152060	152410	145420	204020	191850	191910	154150	182480	190160	0.80892	0.694097	0.750648	1.38773	1.43765	1.38423	1.08134	1.18797	1.10591	0.793269	0.795095	0.758629	1.06433	1.00085	1.00116	0.804172	0.951965	0.99203	plasma membrane
LmxM.13.0820	Complex1_LYR-like, putative OS=Leishmania_mexicana_MHOM/GT/2001/U1103 GN=LmxM.13.0820	LmxM.13.0820	0.665313	0.00447343	Down	27.202	23	4	4	4	0	0	0	184320	172130	160050	131480	123580	168040	108180	99364	105020	79438	108330	71898	0	0	0				1.46302	1.36626	1.27038	1.04361	0.980904	1.3338	0.858668	0.788692	0.833586	0.630531	0.859859	0.570683				mitochondria
LmxM.14.0640	fatty acid elongase, putative OS=Leishmania_mexicana_MHOM/GT/2001/U1103 GN=LmxM.14.0640	LmxM.14.0640	0.58358	0.0302296	Down	42.48	20.3	6	6	6	117440	113250	102220	123940	124480	117550	251520	244210	249750	110360	104740	109210	134420	131170	125930	373940	380280	369740	0.643673	0.620709	0.560255	0.679299	0.682259	0.644276	1.37855	1.33848	1.36885	0.604869	0.574066	0.598566	0.736739	0.718926	0.690206	2.04952	2.08427	2.0265	extracellular	K10203	ELOVL6; elongation of very long chain fatty acids protein 6 [EC:2.3.1.199]
LmxM.14.0660	fatty acid elongase, putative OS=Leishmania_mexicana_MHOM/GT/2001/U1103 GN=LmxM.14.0660	LmxM.14.0660	0.630481	0.00715262	Down	32.498	33.1	9	9	9	844050	788230	783040	1097600	1040700	1031400	1660700	1675500	1657200	889300	820600	863440	788040	782030	800290	2647600	2611400	2674800	0.647721	0.604885	0.600902	0.842295	0.79863	0.791493	1.27442	1.28577	1.27173	0.682446	0.629726	0.662601	0.604739	0.600127	0.61414	2.03176	2.00398	2.05263	cytoplasm	K10203	ELOVL6; elongation of very long chain fatty acids protein 6 [EC:2.3.1.199]
LmxM.14.1340	delta-6 fatty acid desaturase, putative OS=Leishmania_mexicana_MHOM/GT/2001/U1103 GN=LmxM.14.1340	LmxM.14.1340	0.519655	0.00150999	Down	47.998	29.7	11	11	11	71345	75766	54885	196950	177420	181100	120990	111460	110510	72282	84610	76545	76834	67087	65800	47106	30236	45987	0.770412	0.818152	0.59267	2.12675	1.91585	1.95559	1.3065	1.20359	1.19333	0.78053	0.913653	0.826564	0.829685	0.724433	0.710535	0.50867	0.326501	0.496586	plasma membrane	K10225	FADS3; fatty acid desaturase 3 (Delta-13 desaturase) [EC:1.14.19.-]
LmxM.15.0050	cytochrome-b5 reductase, putative OS=Leishmania_mexicana_MHOM/GT/2001/U1103 GN=LmxM.15.0050	LmxM.15.0050	0.650827	0.0397879	Down	31.525	73.5	19	19	19	461770	481640	466680	965570	982600	984680	520270	516480	543150	498270	487030	483210	539510	541640	528730	951200	923450	947830	0.702982	0.733232	0.710457	1.46995	1.49588	1.49904	0.792041	0.786271	0.826872	0.758549	0.741437	0.735622	0.821331	0.824574	0.80492	1.44807	1.40583	1.44294	cytoplasm	K00326	E1.6.2.2; cytochrome-b5 reductase [EC:1.6.2.2]
LmxM.15.0960	ERV/ALR sulfhydryl oxidase domain-containing protein OS=Leishmania_mexicana_MHOM/GT/2001/U1103 GN=LmxM.15.0960	LmxM.15.0960	0.543369	3.58119e-06	Down	34.544	47.8	10	10	10	187330	331570	367680	422080	345850	417840	410070	387030	409170	220290	208190	221400	384260	337060	329460	394460	431370	326810	0.5499	0.97331	1.07931	1.239	1.01523	1.22655	1.20374	1.13611	1.2011	0.646652	0.611133	0.649911	1.12798	0.989426	0.967116	1.15792	1.26627	0.959337	nucleus	K17783	ERV1, GFER, ALR; mitochondrial FAD-linked sulfhydryl oxidase [EC:1.8.3.2]
LmxM.15.1160	tryparedoxin peroxidase OS=Leishmania_mexicana_MHOM/GT/2001/U1103 GN=LmxM.15.1160	LmxM.15.1160	0.528719	0.00303043	Down	22.21	81.9	24	6	6	8150100	10613000	8644400	10157000	9769100	11912000	17781000	17170000	18500000	7672500	8199900	6674600	8693800	9207300	7939300	15842000	17272000	16182000	0.697318	0.908043	0.73961	0.869027	0.835839	1.01918	1.52133	1.46906	1.58285	0.656455	0.701579	0.571075	0.743837	0.787772	0.679282	1.35543	1.47778	1.38452	cytoplasm	K13279	PRDX1; peroxiredoxin 1 [EC:1.11.1.24]
LmxM.15.1260	SET domain containing protein, putative OS=Leishmania_mexicana_MHOM/GT/2001/U1103 GN=LmxM.15.1260	LmxM.15.1260	0.622058	1.22275e-05	Down	45.608	20.1	4	4	4	75486	51131	43220	93955	87750	83120	82768	82767	80380	56537	53392	48926	62557	65518	78106	54603	53886	58903	1.12015	0.758742	0.641349	1.39422	1.30214	1.23343	1.22821	1.22819	1.19277	0.838963	0.792294	0.726022	0.928295	0.972233	1.15903	0.810264	0.799624	0.874072	mitochondria
LmxM.16.1510	hypothetical protein, conserved OS=Leishmania_mexicana_MHOM/GT/2001/U1103 GN=LmxM.16.1510	LmxM.16.1510	0.60892	0.0348585	Down	13.168	61.1	4	4	4	501230	520900	498250	342870	340260	321140	688770	639720	663790	293650	293000	325680	497520	518160	556000	949850	866080	884810	0.929956	0.966451	0.924428	0.636143	0.631301	0.595827	1.27791	1.1869	1.23156	0.544823	0.543617	0.60425	0.923073	0.961368	1.03157	1.7623	1.60688	1.64163	extracellular
LmxM.17.1120	hypothetical protein, conserved OS=Leishmania_mexicana_MHOM/GT/2001/U1103 GN=LmxM.17.1120	LmxM.17.1120	0.588921	1.02719e-06	Down	13.964	28	2	2	2	20593	17341	19316	31310	28632	31817	31201	30023	30478	19250	16868	17904	29164	30222	30897	0	15473	19567	0.833415	0.701804	0.781734	1.26714	1.15876	1.28766	1.26273	1.21505	1.23347	0.779063	0.682661	0.724589	1.18029	1.22311	1.25043		0.626205	0.791892	mitochondria
LmxM.18.0060	hypothetical protein, conserved OS=Leishmania_mexicana_MHOM/GT/2001/U1103 GN=LmxM.18.0060	LmxM.18.0060	0.574733	0.017835	Down	18.861	28	5	5	5	134270	107570	125170	84438	103280	118630	148540	171470	153990	79513	61388	83345	98008	104810	122660	185600	150340	161330	1.1014	0.882384	1.02675	0.692635	0.847193	0.973107	1.21846	1.40655	1.26316	0.652235	0.503558	0.683669	0.803948	0.859744	1.00616	1.52245	1.23322	1.32337	plasma membrane
LmxM.18.0320	Domain of unknown function (DUF4379), putative OS=Leishmania_mexicana_MHOM/GT/2001/U1103 GN=LmxM.18.0320	LmxM.18.0320	0.641976	0.00159506	Down	29.705	37.7	10	10	10	159930	134560	168130	187330	179080	172900	145330	167210	139430	123400	92919	101870	165300	158570	161770	112300	108180	104320	1.1147	0.937871	1.17185	1.30567	1.24817	1.2051	1.01294	1.16544	0.971815	0.860087	0.647637	0.710025	1.15213	1.10522	1.12752	0.782721	0.754005	0.727101	mitochondria
LmxM.18.1290	mitochondrial carrier protein, putative OS=Leishmania_mexicana_MHOM/GT/2001/U1103 GN=LmxM.18.1290	LmxM.18.1290	0.603361	2.89497e-05	Down	34.689	43.1	14	3	3	76145	71350	78825	144820	137150	136540	125740	119170	117820	79607	81187	74891	85518	86002	99794	55814	55178	50784	0.817623	0.766136	0.8464	1.55504	1.47268	1.46613	1.35016	1.27961	1.26512	0.854797	0.871763	0.804158	0.918268	0.923465	1.07156	0.599315	0.592485	0.545304	extracellular	K15104	SLC25A11, OGC; solute carrier family 25 (mitochondrial oxoglutarate transporter), member 11
LmxM.19.0440	nucleosome assembly protein, putative OS=Leishmania_mexicana_MHOM/GT/2001/U1103 GN=LmxM.19.0440	LmxM.19.0440	0.39687	0.00234488	Down	39.825	23.3	8	8	8	340360	317390	324660	396850	396340	358220	742180	805720	821140	249710	241860	207010	513890	549860	542450	639850	674170	691050	0.695187	0.648271	0.66312	0.810568	0.809526	0.731666	1.51591	1.64569	1.67718	0.510034	0.494	0.422819	1.04962	1.12309	1.10796	1.3069	1.377	1.41147	cytoplasm	K11279	NAP1L1, NRP; nucleosome assembly protein 1-like 1
LmxM.19.0500	hypothetical protein, conserved OS=Leishmania_mexicana_MHOM/GT/2001/U1103 GN=LmxM.19.0500	LmxM.19.0500	0.600479	0.0116157	Down	32.975	26.1	6	6	6	90548	90999	91117	139220	175520	185320	95417	101460	98191	76334	81287	81108	82465	95528	94017	55653	53975	58166	0.933311	0.937959	0.939176	1.43499	1.80915	1.91016	0.983497	1.04578	1.01209	0.786802	0.837854	0.836009	0.849996	0.984641	0.969067	0.573635	0.55634	0.599538	nucleus
LmxM.19.1005	4-coumarate:coa ligase-like protein OS=Leishmania_mexicana_MHOM/GT/2001/U1103 GN=LmxM.19.1005	LmxM.19.1005	0.618621	0.000519193	Down	72.039	43.4	31	22	31	1734300	1806600	1771100	1475200	1494200	1557000	1970100	2000900	1994000	1068600	1069500	1107000	1712300	1699300	1733600	2038000	2095400	2102800	1.02588	1.06865	1.04765	0.872615	0.883854	0.921002	1.16536	1.18358	1.1795	0.632102	0.632634	0.654816	1.01287	1.00518	1.02547	1.20552	1.23948	1.24386	mitochondria	K01904	4CL; 4-coumarate--CoA ligase [EC:6.2.1.12]
LmxM.20.0220	hypothetical protein, conserved OS=Leishmania_mexicana_MHOM/GT/2001/U1103 GN=LmxM.20.0220	LmxM.20.0220	0.620187	8.08634e-05	Down	101.4	16.5	10	10	10	238750	239390	255900	403600	412490	423390	341120	351850	334900	232850	237760	232480	279930	291360	330870	237180	232080	226990	0.810407	0.81258	0.868621	1.36997	1.40015	1.43714	1.15789	1.19431	1.13678	0.79038	0.807047	0.789124	0.950188	0.988985	1.1231	0.805078	0.787767	0.770489	cytoplasm
LmxM.21.0023	ring-box protein 1, putative OS=Leishmania_mexicana_MHOM/GT/2001/U1103 GN=LmxM.21.0023	LmxM.21.0023	0.401939	1.83533e-06	Down	12.167	65.1	5	5	5	163900	98542	140530	358660	311130	334440	333930	396020	401370	144020	148590	136570	312560	298870	293350	343990	317030	352640	0.603789	0.363018	0.517697	1.32126	1.14617	1.23204	1.23016	1.45889	1.4786	0.530554	0.547389	0.503109	1.15144	1.101	1.08067	1.26722	1.1679	1.29909	extracellular	K03868	RBX1, ROC1; E3 ubiquitin-protein ligase RBX1 [EC:2.3.2.32]
LmxM.21.0027	hypothetical protein, conserved OS=Leishmania_mexicana_MHOM/GT/2001/U1103 GN=LmxM.21.0027	LmxM.21.0027	0.66393	0.00261883	Down	28.033	38.7	7	7	7	32506	36243	36796	37117	38896	36693	53160	50849	52693	30101	28801	30532	36407	38811	38969	50572	48944	45350	0.808786	0.901767	0.915526	0.923513	0.967776	0.912963	1.32268	1.26518	1.31106	0.748947	0.716601	0.75967	0.905847	0.965661	0.969593	1.25829	1.21778	1.12836	mitochondria
LmxM.21.0260	hypothetical protein, conserved OS=Leishmania_mexicana_MHOM/GT/2001/U1103 GN=LmxM.21.0260	LmxM.21.0260	0.666142	0.00034163	Down	81.4	41.4	22	21	22	172510	195960	187980	199450	186390	201110	221290	223250	226860	124060	140440	154620	161600	151930	158530	148910	166140	168740	0.973481	1.10581	1.06078	1.1255	1.05181	1.13487	1.24875	1.25981	1.28018	0.700076	0.792509	0.872527	0.911915	0.857347	0.894591	0.840305	0.937535	0.952207	mitochondria
LmxM.21.0440	ubiquitin-conjugating enzyme-like protein OS=Leishmania_mexicana_MHOM/GT/2001/U1103 GN=LmxM.21.0440	LmxM.21.0440	0.459524	0.0438583	Down	30.412	10.7	2	2	2	0	0	15609	64244	67977	39537	0	0	0	0	25387	27231	23312	22843	23071	0	0	0			0.454321	1.86991	1.97856	1.15078					0.738923	0.792595	0.678527	0.664876	0.671512				plasma membrane	K20656	TMEM189; plasmanylethanolamine desaturase [EC:1.14.19.77]
LmxM.22.1080	hypothetical protein, conserved OS=Leishmania_mexicana_MHOM/GT/2001/U1103 GN=LmxM.22.1080	LmxM.22.1080	0.447134	0.0177706	Down	27.66	42.7	7	7	7	161020	124000	140080	432100	453250	366850	136910	202000	213090	127120	167960	108280	134470	132850	144820	220310	195900	194610	0.79285	0.610567	0.689743	2.12763	2.23177	1.80634	0.674135	0.994633	1.04924	0.625929	0.827023	0.533163	0.66212	0.654143	0.713083	1.08479	0.964597	0.958245	mitochondria
LmxM.23.0010	hypothetical protein, conserved OS=Leishmania_mexicana_MHOM/GT/2001/U1103 GN=LmxM.23.0010	LmxM.23.0010	0.521634	0.0315755	Down	67.43	24	11	11	11	38688	37611	33142	108920	104420	95313	46533	38976	48397	38106	37963	39358	44001	46457	41166	26960	37089	40950	0.770294	0.74885	0.659871	2.16864	2.07904	1.89772	0.926491	0.776028	0.963604	0.758706	0.755859	0.783634	0.876078	0.924978	0.819632	0.536784	0.738457	0.815331	cytoplasm,nucleus
LmxM.23.0070	agmatinase-like protein OS=Leishmania_mexicana_MHOM/GT/2001/U1103 GN=LmxM.23.0070	LmxM.23.0070	0.648752	3.83682e-07	Down	36.592	34.6	9	9	9	1600600	1713000	1918400	2787200	2732000	2659700	2714700	2518800	2645200	1685900	1731800	1791000	2376800	2272200	2340400	2904300	3002000	2866200	0.681748	0.729623	0.817109	1.18716	1.16365	1.13285	1.15628	1.07284	1.12668	0.71808	0.73763	0.762845	1.01236	0.967804	0.996853	1.23704	1.27865	1.22081	mitochondria	K01476	E3.5.3.1, rocF, arg; arginase [EC:3.5.3.1]
LmxM.23.0700	hypothetical protein, conserved OS=Leishmania_mexicana_MHOM/GT/2001/U1103 GN=LmxM.23.0700	LmxM.23.0700	0.615076	5.15981e-07	Down	13.398	48.7	4	4	4	19491	22697	25949	40790	40002	41123	39105	41406	41017	25866	23091	25911	29207	28071	28101	62697	62924	62410	0.531687	0.619142	0.707852	1.11269	1.0912	1.12178	1.06673	1.1295	1.11889	0.705588	0.62989	0.706816	0.796726	0.765737	0.766556	1.71029	1.71648	1.70246	extracellular
LmxM.23.0720	RNA recognition motif. (a.k.a. RRM, RBD, or RNP domain), putative OS=Leishmania_mexicana_MHOM/GT/2001/U1103 GN=LmxM.23.0720	LmxM.23.0720	0.400864	0.0305398	Down	59.984	19.8	7	7	7	43002	35632	43615	209110	213110	214500	67405	68046	68123	56696	53525	58201	51785	48732	46185	0	0	0	0.50485	0.418325	0.512047	2.45498	2.50194	2.51826	0.791345	0.79887	0.799774	0.665619	0.628391	0.683288	0.607964	0.572121	0.542219				nucleus
LmxM.23.0940	hypothetical protein, conserved OS=Leishmania_mexicana_MHOM/GT/2001/U1103 GN=LmxM.23.0940	LmxM.23.0940	0.528752	0.00392236	Down	18.169	20.4	3	3	3	0	0	18591	46676	49948	59330	0	0	0	23640	31066	27755	0	0	0	37409	53278	35159			0.485592	1.21917	1.30463	1.54968				0.617471	0.811436	0.724954				0.977114	1.39161	0.918344	mitochondria
LmxM.23.0960	hypothetical protein, conserved OS=Leishmania_mexicana_MHOM/GT/2001/U1103 GN=LmxM.23.0960	LmxM.23.0960	0.435119	0.00928292	Down	75.612	19.3	10	10	10	126870	133190	120260	150110	157860	139020	100720	100040	266980	67206	60261	71541	104080	75239	0	88366	69777	80118	1.12824	1.18444	1.06946	1.33491	1.40383	1.23629	0.895693	0.889645	2.37423	0.597656	0.535895	0.636207	0.925573	0.669093		0.78583	0.62052	0.712481	extracellular
LmxM.24.0380	ppg3-related protein-like protein OS=Leishmania_mexicana_MHOM/GT/2001/U1103 GN=LmxM.24.0380	LmxM.24.0380	0.643344	0.0402984	Down	105.3	8.3	4	4	4	0	0	17659	32115	31350	25717	23287	0	24324	21698	13504	0	22096	20090	22322	0	22913	0			0.764804	1.39089	1.35776	1.11379	1.00855		1.05346	0.939731	0.584852		0.956968	0.870089	0.966756		0.992352		nucleus
LmxM.24.1190	Inhibitor of apoptosis-promoting Bax1, putative OS=Leishmania_mexicana_MHOM/GT/2001/U1103 GN=LmxM.24.1190	LmxM.24.1190	0.420449	0.0155507	Down	33.37	12.5	2	2	2	0	0	0	347480	331610	355340	407590	185110	0	0	127750	145900	165170	149170	130810	0	0	0				1.4812	1.41355	1.51471	1.73743	0.789069			0.54456	0.621928	0.70407	0.635867	0.557604				plasma membrane	K21889	TMBIM6, BI1, TEGT; Bax inhibitor 1
LmxM.24.1280	amastin-like surface protein-like protein OS=Leishmania_mexicana_MHOM/GT/2001/U1103 GN=LmxM.24.1280	LmxM.24.1280	0.56512	0.0250308	Down	20.154	10.7	2	2	2	406110	397320	453560	1493500	1532600	1692200	732300	797340	778850	669020	638710	677760	496320	481070	514730	228080	209450	223010	0.588474	0.575737	0.657231	2.16416	2.22081	2.45208	1.06114	1.15539	1.12859	0.969444	0.925523	0.982108	0.719193	0.697095	0.74587	0.330499	0.303504	0.323153	plasma membrane
LmxM.24.1850	hypothetical predicted multi-pass transmembrane protein OS=Leishmania_mexicana_MHOM/GT/2001/U1103 GN=LmxM.24.1850	LmxM.24.1850	0.404551	0.000269155	Down	43.782	30.9	9	9	9	104510	86727	91456	198650	179000	201160	0	0	0	87120	69458	77580	76745	77572	71866	84157	78650	92495	0.993979	0.824848	0.869824	1.88933	1.70244	1.9132				0.828585	0.660605	0.737852	0.72991	0.737776	0.683507	0.800405	0.748028	0.879706	extracellular
LmxM.25.0090	Qc-SNARE protein, putative OS=Leishmania_mexicana_MHOM/GT/2001/U1103 GN=LmxM.25.0090	LmxM.25.0090	0.646368	0.011514	Down	13.426	29.2	4	4	4	53192	59191	57201	80846	57063	75300	85424	66936	77089	55671	34492	52897	53804	55594	56312	67233	76070	81856	0.835352	0.929563	0.898311	1.26964	0.896144	1.18255	1.34154	1.05119	1.21064	0.874283	0.541678	0.830719	0.844963	0.873074	0.88435	1.05586	1.19464	1.2855	mitochondria
LmxM.25.0860	hypothetical protein, conserved OS=Leishmania_mexicana_MHOM/GT/2001/U1103 GN=LmxM.25.0860	LmxM.25.0860	0.372553	4.23812e-06	Down	128.67	10.2	9	9	9	86667	82152	78042	190480	180090	185060	162080	138680	158280	67758	58125	63126	114270	120630	97436	48460	158690	124780	0.737659	0.69923	0.664248	1.62126	1.53282	1.57512	1.37953	1.18036	1.34719	0.576717	0.494726	0.537292	0.9726	1.02673	0.829319	0.412463	1.35068	1.06205	plasma membrane
LmxM.25.1120	aldehyde dehydrogenase, mitochondrial precursor OS=Leishmania_mexicana_MHOM/GT/2001/U1103 GN=LmxM.25.1120	LmxM.25.1120	0.457784	2.17968e-05	Down	54.259	68.9	34	34	34	2712600	2552900	2646100	6430400	6316200	6349800	5151100	4988400	4962300	2628200	2625600	2573900	2757300	2716600	2733500	4407100	4394500	4311500	0.685211	0.644871	0.668413	1.62434	1.59549	1.60398	1.30118	1.26009	1.25349	0.663892	0.663235	0.650175	0.696503	0.686222	0.690491	1.11325	1.11006	1.0891	cytoplasm	K00128	ALDH; aldehyde dehydrogenase (NAD+) [EC:1.2.1.3]
LmxM.26.0030	glycine dehydrogenase, putative OS=Leishmania_mexicana_MHOM/GT/2001/U1103 GN=LmxM.26.0030	LmxM.26.0030	0.556528	0.000456483	Down	106.69	59.5	38	38	38	216060	220360	218850	369700	373180	371890	270760	260530	272120	182380	174340	177040	248010	244230	248750	437190	418910	421370	0.758746	0.773846	0.768543	1.29829	1.31051	1.30598	0.950838	0.914913	0.955614	0.64047	0.612236	0.621718	0.870946	0.857671	0.873544	1.5353	1.4711	1.47974	mitochondria	K00281	GLDC, gcvP; glycine dehydrogenase [EC:1.4.4.2]
LmxM.26.0680	Protein of unknown function (DUF2012), putative OS=Leishmania_mexicana_MHOM/GT/2001/U1103 GN=LmxM.26.0680	LmxM.26.0680	0.636143	4.03033e-06	Down	25.692	40.4	7	7	7	488020	453930	483050	680220	676680	701970	753540	760610	757890	450270	475500	451770	493940	469140	511930	500960	461420	506170	0.871723	0.81083	0.862845	1.21504	1.20872	1.25389	1.34601	1.35864	1.35378	0.804292	0.849359	0.806972	0.882297	0.837999	0.914432	0.894837	0.824209	0.904143	extracellular
LmxM.26.1350	mitochondrial DNA ligase homolog, putative OS=Leishmania_mexicana_MHOM/GT/2001/U1103 GN=LmxM.26.1350	LmxM.26.1350	0.484915	0.010412	Down	48.839	10.4	4	4	4	0	0	0	52365	38750	32880	0	0	0	23209	18545	18373	12492	0	15816	0	0	0				1.97204	1.4593	1.23824				0.874039	0.698395	0.691917	0.470442		0.595622				cytoplasm
LmxM.26.1620	CDP-DAG synthase, putative OS=Leishmania_mexicana_MHOM/GT/2001/U1103 GN=LmxM.26.1620	LmxM.26.1620	0.639543	0.0212413	Down	48.614	24.5	5	5	5	0	65381	85922	88128	134570	128060	110560	132710	133560	65085	108910	58667	78447	109770	98052	55118	95551	67820		0.687663	0.903709	0.926911	1.41538	1.34691	1.16285	1.39581	1.40475	0.68455	1.14549	0.617046	0.825088	1.15454	1.03129	0.579719	1.00498	0.713316	plasma membrane	K00981	E2.7.7.41, CDS1, CDS2, cdsA; phosphatidate cytidylyltransferase [EC:2.7.7.41]
LmxM.26.2030	hypothetical protein, conserved OS=Leishmania_mexicana_MHOM/GT/2001/U1103 GN=LmxM.26.2030	LmxM.26.2030	0.598122	0.0072001	Down	83.583	20.3	9	9	9	123930	110230	122980	283770	269020	310190	169260	173060	182210	131680	142840	140430	163620	158040	166790	81261	73899	79296	0.773889	0.688339	0.767957	1.77202	1.67991	1.937	1.05696	1.08068	1.13782	0.822284	0.891974	0.876924	1.02174	0.986891	1.04153	0.50744	0.461467	0.495169	plasma membrane
LmxM.27.0340	MP44, putative OS=Leishmania_mexicana_MHOM/GT/2001/U1103 GN=LmxM.27.0340	LmxM.27.0340	0.661384	0.000319224	Down	42.514	34.9	10	10	10	97305	144060	100840	187570	200870	195680	190470	166630	209610	111210	137920	131440	111970	125600	134360	184770	166910	168820	0.633213	0.937472	0.656217	1.22061	1.30716	1.27339	1.23949	1.08435	1.36404	0.7237	0.897516	0.855347	0.728646	0.817343	0.874349	1.20239	1.08617	1.0986	mitochondria
LmxM.27.0420	ribokinase, putative OS=Leishmania_mexicana_MHOM/GT/2001/U1103 GN=LmxM.27.0420	LmxM.27.0420	0.652489	0.00149973	Down	35.274	59.9	15	15	15	2466400	2589300	2434100	2896000	2916800	2934200	2195900	2080700	2079500	1731300	1608800	1587200	1748800	1748200	1677900	1873100	1741800	1754100	1.16633	1.22445	1.15105	1.36948	1.37932	1.38754	1.03841	0.983935	0.983368	0.818708	0.76078	0.750565	0.826984	0.8267	0.793456	0.885764	0.823674	0.82949	mitochondria	K00852	rbsK, RBKS; ribokinase [EC:2.7.1.15]
LmxM.27.0745	hypothetical protein, conserved (pseudogene) OS=Leishmania_mexicana_MHOM/GT/2001/U1103 GN=LmxM.27.0745	LmxM.27.0745	0.542052	0.005554	Down	12.248	77.3	7	7	7	174550	167400	173500	177060	183060	168860	305410	314620	312990	140930	126410	128900	153890	143880	154880	788350	854820	826660	0.59324	0.568939	0.589671	0.601771	0.622163	0.573902	1.03799	1.06929	1.06375	0.478976	0.429627	0.43809	0.523023	0.489002	0.526388	2.67935	2.90526	2.80955	cytoplasm,nucleus
LmxM.27.0750	Stress responsive A/B Barrel Domain, putative OS=Leishmania_mexicana_MHOM/GT/2001/U1103 GN=LmxM.27.0750	LmxM.27.0750	0.655094	5.94598e-05	Down	14.255	77.2	5	5	5	283950	237390	257510	353810	317440	335390	309180	290360	343190	227140	209350	202020	259830	266060	254990	593830	578180	538250	0.872519	0.729449	0.791274	1.08718	0.975426	1.03058	0.950045	0.892215	1.05455	0.697953	0.643288	0.620765	0.798403	0.817546	0.783531	1.82471	1.77663	1.65393	cytoplasm,nucleus
LmxM.27.0950	hypothetical protein, conserved OS=Leishmania_mexicana_MHOM/GT/2001/U1103 GN=LmxM.27.0950	LmxM.27.0950	0.639717	0.00147717	Down	98.035	6.8	5	5	5	52741	54709	59458	64026	53583	57667	50929	45972	49034	39639	30136	32967	39814	38590	41026	0	0	0	1.11379	1.15535	1.25564	1.35211	1.13157	1.21782	1.07552	0.970842	1.03551	0.837101	0.636415	0.696201	0.840796	0.814948	0.866391				nucleus
LmxM.27.1400	hypothetical protein, conserved OS=Leishmania_mexicana_MHOM/GT/2001/U1103 GN=LmxM.27.1400	LmxM.27.1400	0.480845	0.000685203	Down	16.093	40.3	3	3	3	0	0	114680	239160	235630	220410	200080	145180	183410	109730	101820	82696	163260	145570	176370	143660	116090	113390			0.736564	1.53607	1.5134	1.41564	1.28507	0.932458	1.178	0.704771	0.653967	0.531138	1.04858	0.934963	1.13278	0.922696	0.74562	0.728278	extracellular
LmxM.27.1670	molybdopterin synthase sulphurylase-like protein, putative OS=Leishmania_mexicana_MHOM/GT/2001/U1103 GN=LmxM.27.1670	LmxM.27.1670	0.561791	0.0128926	Down	49.228	25.9	9	9	9	125070	134730	116740	198790	204690	241480	115180	144510	159380	107060	87471	104350	121820	33684	94038	80311	79163	78416	1.01095	1.08903	0.943615	1.60683	1.65452	1.95189	0.931005	1.16808	1.28828	0.865371	0.707032	0.843466	0.984677	0.272269	0.760114	0.649158	0.639878	0.63384	plasma membrane	K11996	MOCS3, UBA4; adenylyltransferase and sulfurtransferase [EC:2.7.7.80 2.8.1.11]
LmxM.27.1945	hypothetical protein, conserved OS=Leishmania_mexicana_MHOM/GT/2001/U1103 GN=LmxM.27.1945	LmxM.27.1945	0.394108	0.00436167	Down	28.996	33.6	5	5	5	0	0	34142	32081	52546	36802	38172	0	0	0	15320	16130	23665	29946	28439	0	0	0			1.11124	1.04416	1.71024	1.19781	1.2424				0.498628	0.524992	0.770237	0.974668	0.925619				nucleus
LmxM.27.2020	D-lactate dehydrogenase-like protein OS=Leishmania_mexicana_MHOM/GT/2001/U1103 GN=LmxM.27.2020	LmxM.27.2020	0.545834	0.000170311	Down	53.423	72.6	30	30	30	5975400	6151400	6199800	10240000	10326000	10714000	7998500	7928100	7940600	5078700	5001100	4970800	4896600	4929200	4862200	4009000	3838400	4066800	0.934252	0.961769	0.969336	1.60102	1.61447	1.67513	1.25056	1.23956	1.24151	0.794053	0.78192	0.777183	0.765582	0.770679	0.760203	0.626806	0.600132	0.635843	cytoplasm	K00102	LDHD, dld; D-lactate dehydrogenase (cytochrome) [EC:1.1.2.4]
LmxM.28.0250	NADH-ubiquinone oxidoreductase complex I, 21 kDa subunit, putative OS=Leishmania_mexicana_MHOM/GT/2001/U1103 GN=LmxM.28.0250	LmxM.28.0250	0.297465	0.00492894	Down	34.481	23.9	5	5	5	61977	0	35198	197520	181000	142240	56258	71294	58078	32011	40298	32754	43111	51948	51190	135340	43532	52594	0.819073		0.465168	2.61038	2.39205	1.87981	0.743492	0.942204	0.767545	0.42305	0.532569	0.432869	0.569745	0.686532	0.676515	1.78862	0.575308	0.69507	nucleus
LmxM.28.2385	DNA replication licensing factor, putative OS=Leishmania_mexicana_MHOM/GT/2001/U1103 GN=LmxM.28.2385	LmxM.28.2385	0.57487	0.0241657	Down	96.797	32.5	19	19	19	393580	388100	402500	707270	1038200	973230	570850	543660	530560	427300	386370	440630	427390	408730	457710	104650	108650	128530	0.839597	0.827906	0.858625	1.50877	2.21472	2.07612	1.21775	1.15975	1.13181	0.911529	0.824216	0.939965	0.911721	0.871915	0.976401	0.223242	0.231775	0.274184	nucleus	K02542	MCM6; DNA replication licensing factor MCM6 [EC:5.6.2.3]
LmxM.28.2900	oligomeric golgi complex component 8, putative OS=Leishmania_mexicana_MHOM/GT/2001/U1103 GN=LmxM.28.2900	LmxM.28.2900	0.507892	0.0353506	Down	58.249	13	4	4	4	13558	0	10008	38462	40104	34450	19843	26520	14985	13641	15011	15627	25088	19719	33205	22934	16473	16655	0.612534		0.452149	1.73767	1.81185	1.55641	0.896482	1.19814	0.677004	0.616283	0.678178	0.706009	1.13344	0.89088	1.50016	1.03613	0.74423	0.752452	nucleus	K20295	COG8; conserved oligomeric Golgi complex subunit 8
LmxM.29.0230	mitochondrial carrier protein, putative OS=Leishmania_mexicana_MHOM/GT/2001/U1103 GN=LmxM.29.0230	LmxM.29.0230	0.591805	0.000817823	Down	40.433	22	6	6	6	124240	97590	112700	237320	203100	187750	155400	174220	207020	107750	112290	124630	171090	147050	150530	105300	107910	117470	0.846014	0.664541	0.767432	1.61603	1.38301	1.27849	1.0582	1.18635	1.40971	0.733725	0.76464	0.84867	1.16504	1.00134	1.02504	0.717042	0.734815	0.799914	plasma membrane
LmxM.29.0530	glycosyltransferase family 28 protein, putative OS=Leishmania_mexicana_MHOM/GT/2001/U1103 GN=LmxM.29.0530	LmxM.29.0530	0.54893	0.0379631	Down	47.302	29.1	7	7	7	30957	35367	29871	88677	92977	70585	52074	36759	54603	41770	32553	34276	62260	53440	50416	27835	24751	19181	0.664668	0.759354	0.641351	1.90396	1.99628	1.51551	1.11806	0.789241	1.17236	0.896831	0.698936	0.73593	1.33677	1.14739	1.08247	0.597637	0.531421	0.411829	plasma membrane	K07441	ALG14; beta-1,4-N-acetylglucosaminyltransferase [EC:2.4.1.141]
LmxM.29.1510	p1/s1 nuclease OS=Leishmania_mexicana_MHOM/GT/2001/U1103 GN=LmxM.29.1510	LmxM.29.1510	0.586506	1.38637e-06	Down	35.208	33.2	7	2	7	212320	206900	204800	321680	342470	294130	302760	307900	296240	178170	185470	183330	233750	239020	262940	324060	352020	330630	0.799767	0.779351	0.771441	1.2117	1.29002	1.10793	1.14044	1.1598	1.11588	0.671131	0.698629	0.690568	0.88049	0.900341	0.990443	1.22067	1.32599	1.24542	extracellular
LmxM.29.1625	Protein of unknown function (DUF1077), putative OS=Leishmania_mexicana_MHOM/GT/2001/U1103 GN=LmxM.29.1625	LmxM.29.1625	0.431243	1.03653e-06	Down	16.978	22.7	4	4	4	139910	107710	140980	397480	448540	436960	416590	469210	461290	167630	198960	200510	304000	0	308300	252250	261050	295360	0.475055	0.365722	0.478688	1.34962	1.52299	1.48367	1.4145	1.59317	1.56628	0.569176	0.675555	0.680818	1.03221		1.04681	0.856497	0.886377	1.00287	plasma membrane	K23565	EMC4, TMEM85; ER membrane protein complex subunit 4
LmxM.29.1930	succinyl-coa:3-ketoacid-coenzyme a transferase- like protein OS=Leishmania_mexicana_MHOM/GT/2001/U1103 GN=LmxM.29.1930	LmxM.29.1930	0.63548	0.000150175	Down	53.516	38.8	14	3	3	63218	58494	62242	80218	72273	78949	89404	88083	90900	48456	53957	56402	72516	62218	65383	85989	87040	82948	0.876209	0.810734	0.862682	1.11183	1.00171	1.09424	1.23915	1.22084	1.25988	0.671606	0.747851	0.781739	1.00508	0.862349	0.906216	1.19182	1.20638	1.14967	mitochondria	K01027	OXCT; 3-oxoacid CoA-transferase [EC:2.8.3.5]
LmxM.29.1940	succinyl-coa:3-ketoacid-coenzyme a transferase- like protein OS=Leishmania_mexicana_MHOM/GT/2001/U1103 GN=LmxM.29.1940	LmxM.29.1940	0.562847	0.00500948	Down	53.162	45.1	16	5	16	474470	472980	470170	1129500	1071700	1127000	669550	636250	656850	485660	471250	532060	497870	491700	477510	629220	624400	593620	0.74189	0.73956	0.735166	1.76611	1.67573	1.7622	1.04692	0.994852	1.02706	0.759387	0.736855	0.831939	0.778479	0.768831	0.746643	0.98386	0.976323	0.928195	mitochondria	K01027	OXCT; 3-oxoacid CoA-transferase [EC:2.8.3.5]
LmxM.29.2050	ferric reductase transmembrane protein-like protein OS=Leishmania_mexicana_MHOM/GT/2001/U1103 GN=LmxM.29.2050	LmxM.29.2050	0.284627	0.000633613	Down	24.815	35.8	6	6	6	56284	64923	66427	215250	283650	229140	176100	180180	0	49226	90979	44971	71626	83974	88857	0	0	0	0.463083	0.534161	0.546536	1.77099	2.33376	1.88528	1.44888	1.48245		0.405012	0.74854	0.370004	0.589311	0.690906	0.731081				plasma membrane
LmxM.29.2090	alcohol dehydrogenase, putative OS=Leishmania_mexicana_MHOM/GT/2001/U1103 GN=LmxM.29.2090	LmxM.29.2090	0.613667	0.000822902	Down	43.533	30.8	7	7	7	100750	78460	89912	118400	114520	120230	153370	168720	166030	86032	90186	81912	127400	119710	116860	168860	157900	159850	0.817222	0.63642	0.729311	0.960388	0.928916	0.975232	1.24404	1.36855	1.34673	0.697839	0.731534	0.66442	1.03339	0.971014	0.947897	1.36969	1.28079	1.29661	mitochondria	K11173	ADHFE1; hydroxyacid-oxoacid transhydrogenase [EC:1.1.99.24]
LmxM.29.2200	Zinc finger C-x8-C-x5-C-x3-H type (and similar), putative OS=Leishmania_mexicana_MHOM/GT/2001/U1103 GN=LmxM.29.2200	LmxM.29.2200	0.65041	0.0404641	Down	18.073	19.5	2	2	2	51734	61603	0	79993	69771	69184	0	0	0	46062	59819	36525	27809	34542	39182	0	0	0	0.987592	1.17599		1.52705	1.33191	1.32071				0.879314	1.14193	0.697255	0.530868	0.6594	0.747976				nucleus
LmxM.29.2800	hypothetical protein, conserved OS=Leishmania_mexicana_MHOM/GT/2001/U1103 GN=LmxM.29.2800	LmxM.29.2800	0.633651	6.30709e-05	Down	30.165	22.3	7	7	7	155100	143180	169120	263310	223570	228690	229120	227290	206950	157760	140290	138830	220470	184090	159680	110710	71660	90170	0.894811	0.826041	0.975695	1.5191	1.28983	1.31937	1.32185	1.31129	1.19395	0.910157	0.809368	0.800945	1.27195	1.06206	0.921234	0.638714	0.413424	0.520213	mitochondria
LmxM.29.3460	zinc-binding protein (Yippee), putative OS=Leishmania_mexicana_MHOM/GT/2001/U1103 GN=LmxM.29.3460	LmxM.29.3460	0.602873	0.0375928	Down	16.364	50	4	4	4	19129	20852	19869	17532	23193	18359	37088	35553	42003	14872	19728	17768	29225	31403	25217	18410	26794	33895	0.76365	0.832434	0.793191	0.699896	0.925889	0.73291	1.48059	1.41931	1.6768	0.593706	0.787562	0.709317	1.16669	1.25364	1.00669	0.734946	1.06964	1.35312	mitochondria	K23339	YPEL5; protein yippee-like 5
LmxM.30.0590	C-5 sterol desaturase, putative OS=Leishmania_mexicana_MHOM/GT/2001/U1103 GN=LmxM.30.0590	LmxM.30.0590	0.429651	0.0159194	Down	31.44	14.2	3	3	3	78303	83179	72164	103970	110540	107890	181070	188610	137180	0	38233	80531	72283	52164	81009	140130	128270	58650	0.776554	0.824911	0.715672	1.0311	1.09626	1.06998	1.79573	1.8705	1.36046		0.379168	0.79865	0.716852	0.517326	0.803391	1.38971	1.27209	0.58165	plasma membrane
LmxM.30.1570	cytochrome c oxidase VIII (COX VIII), putative OS=Leishmania_mexicana_MHOM/GT/2001/U1103 GN=LmxM.30.1570	LmxM.30.1570	0.622462	3.80178e-05	Down	18.842	43.3	6	6	6	333320	318170	313270	779440	760310	785220	641190	653590	649680	436560	453460	438760	426780	419290	410530	824550	820660	813630	0.583725	0.557193	0.548612	1.36499	1.33149	1.37511	1.12288	1.1446	1.13775	0.764523	0.794119	0.768376	0.747396	0.734279	0.718938	1.44399	1.43718	1.42486	mitochondria
LmxM.30.1730	hypothetical protein, conserved OS=Leishmania_mexicana_MHOM/GT/2001/U1103 GN=LmxM.30.1730	LmxM.30.1730	0.622149	0.00581128	Down	42.736	14.7	4	4	4	93432	93771	93440	109330	105160	125280	89886	103110	111160	46648	76748	76913	92963	96378	100220	0	0	0	0.990838	0.994433	0.990923	1.15943	1.11521	1.32858	0.953233	1.09347	1.17884	0.494698	0.813906	0.815656	0.985864	1.02208	1.06282				extracellular
LmxM.30.2330	3,2-trans-enoyl-CoA isomerase, mitochondrial precursor, putative OS=Leishmania_mexicana_MHOM/GT/2001/U1103 GN=LmxM.30.2330	LmxM.30.2330	0.665498	0.000559321	Down	38.361	52.2	11	9	9	68306	63665	71029	143480	147080	144820	121240	131420	112540	93197	85245	87950	87617	82683	91545	197180	194650	211510	0.57584	0.536715	0.598795	1.20958	1.23993	1.22088	1.02209	1.10791	0.948745	0.785678	0.71864	0.741444	0.738637	0.697042	0.771751	1.66229	1.64096	1.78309	mitochondria	K13238	ECI1, DCI; Delta3-Delta2-enoyl-CoA isomerase [EC:5.3.3.8]
LmxM.30.2580	ubiquinol-cytochrome-c reductase-like protein OS=Leishmania_mexicana_MHOM/GT/2001/U1103 GN=LmxM.30.2580	LmxM.30.2580	0.396791	0.000131111	Down	14.784	39.3	4	4	4	58389	37606	0	163780	189790	196490	223150	226060	233690	75891	87185	0	158740	148440	147630	275830	262590	270060	0.339062	0.218376		0.951062	1.1021	1.14101	1.29582	1.31272	1.35703	0.440695	0.506279		0.921795	0.861983	0.857279	1.60173	1.52485	1.56822	extracellular
LmxM.30.2750	kinetoplastid kinetochore protein 8, putative OS=Leishmania_mexicana_MHOM/GT/2001/U1103 GN=LmxM.30.2750	LmxM.30.2750	0.511798	0.0369416	Down	48.586	10.5	3	3	3	0	22025	0	59856	38208	64451	0	0	30225	25986	0	23336	0	16135	16892	8680.9	0	0		0.720254		1.95739	1.24946	2.10765			0.988408	0.849785		0.763126		0.527641	0.552396	0.28388			nucleus
LmxM.30.2840	hypothetical protein, conserved OS=Leishmania_mexicana_MHOM/GT/2001/U1103 GN=LmxM.30.2840	LmxM.30.2840	0.650494	0.000513401	Down	42.336	21.4	5	5	5	294960	296110	247980	449040	421840	531620	511150	576160	529220	334960	324110	322860	362190	374460	379280	532170	578200	579310	0.694421	0.697129	0.583817	1.05717	0.993133	1.25159	1.20339	1.35645	1.24594	0.788593	0.763049	0.760106	0.8527	0.881587	0.892935	1.25288	1.36125	1.36386	plasma membrane
LmxM.30.2960	Repressor of differentiation kinase 2, putative OS=Leishmania_mexicana_MHOM/GT/2001/U1103 GN=LmxM.30.2960	LmxM.30.2960	0.657995	1.93097e-05	Down	49.798	54.6	20	19	20	339540	330190	343750	595510	571330	578310	510380	507010	493440	364160	349710	357340	398460	406850	407790	564920	531430	565500	0.743915	0.723429	0.753139	1.30473	1.25175	1.26705	1.11822	1.11083	1.0811	0.797856	0.766197	0.782914	0.873005	0.891387	0.893447	1.23771	1.16434	1.23898	cytoplasm	K08857	NEK1_4_5; serine/threonine-protein kinase Nek1/4/5 [EC:2.7.11.1]
LmxM.30.3090	peptidase, putative OS=Leishmania_mexicana_MHOM/GT/2001/U1103 GN=LmxM.30.3090	LmxM.30.3090	0.619953	0.0292148	Down	118.63	20	12	11	12	100490	22271	28858	72872	67441	0	54583	52632	53616	54712	29779	27526	61188	60224	67376	357460	482920	408970	0.852921	0.189028	0.244936	0.61851	0.572413		0.46328	0.44672	0.455072	0.464374	0.252753	0.23363	0.51934	0.511158	0.571862	3.03398	4.09884	3.47118	mitochondria	K01408	IDE, ide; insulysin [EC:3.4.24.56]
LmxM.31.0300	hypothetical protein, conserved OS=Leishmania_mexicana_MHOM/GT/2001/U1103 GN=LmxM.31.0300	LmxM.31.0300	0.577758	0.0264333	Down	82.693	11.6	4	4	4	17889	17750	0	31500	17333	21539	22948	19739	32522	16014	9150.3	16891	25660	34809	33503	0	0	0	0.789435	0.783301		1.39008	0.764899	0.950508	1.01269	0.871074	1.43518	0.706692	0.403799	0.745393	1.13237	1.53611	1.47847				nucleus
LmxM.31.1050	vacuolar sorting-like protein OS=Leishmania_mexicana_MHOM/GT/2001/U1103 GN=LmxM.31.1050	LmxM.31.1050	0.629261	2.648e-05	Down	22.427	60.5	8	8	8	129080	147210	136270	226110	218940	204430	242810	239150	235370	145590	152650	131800	196980	194360	192790	222460	219140	219600	0.672537	0.766998	0.709998	1.17809	1.14073	1.06513	1.2651	1.24603	1.22633	0.758558	0.795342	0.686709	1.02631	1.01266	1.00448	1.15907	1.14177	1.14417	cytoplasm	K18467	VPS29; vacuolar protein sorting-associated protein 29
LmxM.31.1150	hypothetical protein, conserved OS=Leishmania_mexicana_MHOM/GT/2001/U1103 GN=LmxM.31.1150	LmxM.31.1150	0.599218	0.00234365	Down	33.513	43.1	12	12	12	149360	154620	146960	334600	331550	334530	222550	225640	224610	170950	168010	162430	190930	191860	192710	104990	107030	109620	0.763133	0.790008	0.750871	1.70959	1.69401	1.70923	1.13709	1.15287	1.14761	0.873444	0.858423	0.829912	0.975529	0.980281	0.984624	0.536431	0.546854	0.560087	cytoplasm
LmxM.31.1820	iron superoxide dismutase, putative OS=Leishmania_mexicana_MHOM/GT/2001/U1103 GN=LmxM.31.1820	LmxM.31.1820	0.59506	0.00171838	Down	21.722	77.4	13	4	4	2916900	3064300	3176900	4152000	3949600	4047600	5520400	4051900	5705000	2874800	2692900	2592500	3241000	3675700	3786700	3271700	3765800	3335400	0.79768	0.83799	0.868782	1.13544	1.08009	1.10689	1.50966	1.10807	1.56014	0.786167	0.736423	0.708967	0.886312	1.00519	1.03554	0.894707	1.02983	0.912127	cytoplasm	K04564	SOD2; superoxide dismutase, Fe-Mn family [EC:1.15.1.1]
LmxM.31.3450	zinc-finger of a C2HC-type, putative OS=Leishmania_mexicana_MHOM/GT/2001/U1103 GN=LmxM.31.3450	LmxM.31.3450	0.643202	3.67834e-05	Down	58.411	27.7	10	10	10	353870	361810	355670	472830	470430	474070	394180	394370	396570	279210	266480	291260	351840	361400	358910	287030	291690	287280	0.987713	1.00987	0.992737	1.31975	1.31305	1.32321	1.10022	1.10076	1.1069	0.779324	0.743792	0.812957	0.982047	1.00873	1.00178	0.801151	0.814157	0.801848	mitochondria
LmxM.32.0540	Scaffold protein Nfu/NifU N terminal/NifU-like domain containing protein, putative OS=Leishmania_mexicana_MHOM/GT/2001/U1103 GN=LmxM.32.0540	LmxM.32.0540	0.504521	0.0322339	Down	45.27	19.2	6	6	6	0	0	0	44523	38145	40633	0	23979	19188	20504	14911	14977	18903	26149	23869	28597	32889	37010				1.62206	1.3897	1.48034		0.873604	0.699058	0.747003	0.543238	0.545643	0.688675	0.952662	0.869597	1.04185	1.19821	1.34835	mitochondria	K22074	NFU1, HIRIP5; NFU1 iron-sulfur cluster scaffold homolog, mitochondrial
LmxM.32.0830	2,4-dienoyl-coa reductase fadh1, putative OS=Leishmania_mexicana_MHOM/GT/2001/U1103 GN=LmxM.32.0830	LmxM.32.0830	0.505386	6.47119e-05	Down	78.76	62.9	32	32	32	324840	319400	318910	597030	580680	567740	448040	450960	449700	256840	265050	259980	298660	299820	297410	307560	308400	312350	0.877502	0.862807	0.861483	1.61278	1.56861	1.53366	1.21031	1.21819	1.21479	0.693811	0.715989	0.702293	0.806781	0.809915	0.803404	0.830823	0.833092	0.843762	cytoplasm
LmxM.32.0860	hypothetical protein, conserved OS=Leishmania_mexicana_MHOM/GT/2001/U1103 GN=LmxM.32.0860	LmxM.32.0860	0.640802	0.00309503	Down	46.216	14.7	5	5	5	29095	25568	22516	51671	36430	46311	51140	53247	50916	30529	35542	26754	33041	36576	29611	24278	34133	20842	0.820605	0.721128	0.635049	1.45735	1.02748	1.30617	1.44237	1.5018	1.43605	0.86105	1.00244	0.754579	0.931899	1.0316	0.835158	0.684745	0.962698	0.587835	mitochondria
LmxM.32.0890	hypothetical protein, conserved OS=Leishmania_mexicana_MHOM/GT/2001/U1103 GN=LmxM.32.0890	LmxM.32.0890	0.589774	0.0168465	Down	13.14	47.4	4	3	4	0	0	0	137750	136920	118640	171180	193060	187400	81329	104440	0	0	47397	18083	233710	195720	224060				0.968136	0.962302	0.833827	1.20309	1.35687	1.31709	0.571597	0.734026			0.333116	0.127091	1.64256	1.37556	1.57474	cytoplasm
LmxM.32.1140	hypothetical protein, conserved OS=Leishmania_mexicana_MHOM/GT/2001/U1103 GN=LmxM.32.1140	LmxM.32.1140	0.604573	0.0405882	Down	45.152	37	10	10	10	144420	136080	177310	452940	462210	399820	209170	213780	220090	207910	175070	208900	151010	147950	138730	75903	61899	56509	0.714224	0.672978	0.87688	2.24	2.28584	1.97729	1.03444	1.05724	1.08845	1.02821	0.865802	1.03311	0.746814	0.731681	0.686084	0.375375	0.306119	0.279463	peroxisome
LmxM.32.1460partial	RNA recognition motif. (a.k.a. RRM, RBD, or RNP domain), putative OS=Leishmania_mexicana_MHOM/GT/2001/U1103 GN=LmxM.32.1460partial	LmxM.32.1460partial	0.465418	2.13559e-05	Down	18.731	74.1	7	7	7	134800	115200	127230	407510	386270	392670	294060	300020	312470	154610	155790	176660	227970	215090	225360	115770	118840	121470	0.609374	0.520771	0.575153	1.84218	1.74616	1.7751	1.32932	1.35626	1.41255	0.698927	0.704261	0.798606	1.03056	0.972332	1.01876	0.523348	0.537226	0.549115	nucleus
LmxM.33.0070	ascorbate peroxidase, putative OS=Leishmania_mexicana_MHOM/GT/2001/U1103 GN=LmxM.33.0070	LmxM.33.0070	0.556801	2.68177e-05	Down	33.62	52.1	17	17	17	780880	755160	769010	654320	641560	676550	795800	740550	793190	394450	420780	382440	801930	746150	777330	140840	132030	136060	1.33369	1.28977	1.31342	1.11754	1.09574	1.1555	1.35918	1.26481	1.35472	0.673696	0.718666	0.653183	1.36965	1.27438	1.32763	0.240546	0.225499	0.232382	extracellular	K00428	E1.11.1.5; cytochrome c peroxidase [EC:1.11.1.5]
LmxM.33.0400	hypothetical protein, conserved OS=Leishmania_mexicana_MHOM/GT/2001/U1103 GN=LmxM.33.0400	LmxM.33.0400	0.647637	1.64296e-05	Down	18.838	47.8	7	7	7	114490	115870	117080	135740	136300	129340	145090	149150	149400	96891	90662	86080	129620	125220	126490	101400	110740	111750	0.949112	0.960552	0.970583	1.12527	1.12992	1.07222	1.20278	1.23644	1.23851	0.803218	0.75158	0.713596	1.07454	1.03806	1.04859	0.840597	0.918025	0.926398	mitochondria
LmxM.33.0830	25 Kd elongation factor 1-beta, putative OS=Leishmania_mexicana_MHOM/GT/2001/U1103 GN=LmxM.33.0830	LmxM.33.0830	0.657485	0.0118552	Down	8.7728	57.1	5	5	5	51648	32064	0	41502	42057	51338	73609	63336	71019	39406	37485	35822	51873	41999	46858	195600	152390	158010	0.740307	0.459596		0.594877	0.602833	0.735864	1.05509	0.907839	1.01797	0.564834	0.537299	0.513462	0.743532	0.602001	0.671649	2.80367	2.18431	2.26487	cytoplasm
LmxM.33.2800	tuzin, putative OS=Leishmania_mexicana_MHOM/GT/2001/U1103 GN=LmxM.33.2800	LmxM.33.2800	0.657247	5.16577e-05	Down	61.762	17.2	5	5	5	17817	13632	18333	32113	32960	30258	30259	30938	33997	23420	19555	19636	34027	33127	34865	26573	29302	30521	0.652726	0.499409	0.67163	1.17646	1.20749	1.1085	1.10854	1.13341	1.24548	0.857992	0.716398	0.719365	1.24658	1.21361	1.27728	0.973503	1.07348	1.11814	cytoplasm
LmxM.33.2910	patatin-like phospholipase, putative OS=Leishmania_mexicana_MHOM/GT/2001/U1103 GN=LmxM.33.2910	LmxM.33.2910	0.343772	0.0219192	Down	46.06	16.9	6	6	6	32214	42342	36875	132600	116880	119840	49192	71674	46664	12477	47858	31942	37631	54746	45882	58850	122960	78314	0.509115	0.66918	0.582778	2.09563	1.84719	1.89397	0.777438	1.13275	0.737485	0.197188	0.756355	0.504816	0.594726	0.865214	0.725126	0.930075	1.94328	1.23769	cytoplasm
LmxM.33.3050	cytochrome b5-like Heme/Steroid binding domain containing protein, putative OS=Leishmania_mexicana_MHOM/GT/2001/U1103 GN=LmxM.33.3050	LmxM.33.3050	0.570623	4.722e-05	Down	19.89	46.1	7	7	7	716260	707240	735350	1131400	1203000	1285100	1010100	1051500	1008400	657720	596100	654770	690470	750170	724350	658790	687850	679530	0.862496	0.851635	0.885484	1.36239	1.44861	1.54747	1.21633	1.26618	1.21428	0.792004	0.717804	0.788452	0.831441	0.90333	0.872238	0.793293	0.828286	0.818267	extracellular	K17278	PGRMC1_2; membrane-associated progesterone receptor component
LmxM.33.3610	Complex 1 protein (LYR family), putative OS=Leishmania_mexicana_MHOM/GT/2001/U1103 GN=LmxM.33.3610	LmxM.33.3610	0.616146	0.000264506	Down	19.768	35.8	4	4	4	48751	38972	48068	67143	78954	79216	73962	59802	71873	46667	45984	40113	62250	59087	51727	62726	62203	60799	0.829179	0.662854	0.817563	1.142	1.34289	1.34734	1.25798	1.01714	1.22245	0.793734	0.782117	0.68226	1.05878	1.00498	0.879797	1.06687	1.05798	1.0341	cytoplasm
LmxM.33.4050	conserved protein, unknown function OS=Leishmania_mexicana_MHOM/GT/2001/U1103 GN=LmxM.33.4050	LmxM.33.4050	0.635793	0.0455497	Down	74.23	17.4	8	8	8	38088	35083	39012	56751	53683	47926	43943	26479	35842	27995	25094	31034	45600	43551	47144	30641	28454	0	0.986555	0.90872	1.01049	1.46996	1.3905	1.24138	1.13821	0.685859	0.928379	0.725126	0.649985	0.803843	1.18113	1.12806	1.22112	0.793663	0.737015		nucleus
LmxM.34.0100	ubiquinol-cytochrome c reductase complex 14kD subunit, putative OS=Leishmania_mexicana_MHOM/GT/2001/U1103 GN=LmxM.34.0100	LmxM.34.0100	0.659349	2.82718e-08	Down	24.239	54.5	9	9	9	1676100	1646800	1567100	2428700	2393600	2405600	2521100	2537300	2408500	1628900	1598500	1617100	2209200	2233500	2220500	1961500	2066800	2067800	0.811265	0.797083	0.758507	1.17554	1.15855	1.16436	1.22026	1.2281	1.16576	0.788419	0.773705	0.782708	1.0693	1.08106	1.07476	0.949404	1.00037	1.00086	mitochondria
LmxM.34.0620	hypothetical protein, unknown function OS=Leishmania_mexicana_MHOM/GT/2001/U1103 GN=LmxM.34.0620	LmxM.34.0620	0.617017	0.000154608	Down	41.03	38.2	11	11	11	127380	114690	114420	258010	226260	265190	214050	233510	262130	133140	156540	160480	174630	154390	150740	143900	135250	137250	0.725133	0.652893	0.651355	1.46877	1.28802	1.50964	1.21852	1.3293	1.49222	0.757922	0.891131	0.91356	0.994111	0.878892	0.858113	0.819175	0.769934	0.781319	plasma membrane
LmxM.34.0840	nuclear transmembrane protein, putative OS=Leishmania_mexicana_MHOM/GT/2001/U1103 GN=LmxM.34.0840	LmxM.34.0840	0.613989	0.0153423	Down	45.632	22.9	7	7	7	98314	98359	88649	230810	256180	228090	124750	143920	158420	100310	120200	130130	127000	102250	115750	83388	71281	71051	0.753411	0.753756	0.679345	1.76877	1.96319	1.74793	0.955999	1.1029	1.21402	0.768707	0.921131	0.997228	0.973241	0.783574	0.887029	0.639029	0.546249	0.544486	plasma membrane
LmxM.34.0980	aldose 1-epimerase-like protein OS=Leishmania_mexicana_MHOM/GT/2001/U1103 GN=LmxM.34.0980	LmxM.34.0980	0.639457	0.000245912	Down	41.926	71.6	18	12	18	774770	743810	785260	1760000	1749200	1691300	1413000	1398800	1382800	991580	1005000	1007300	951050	959940	979620	1149300	1101200	1107000	0.665644	0.639045	0.674656	1.5121	1.50283	1.45308	1.21398	1.20178	1.18803	0.851916	0.863446	0.865422	0.817095	0.824733	0.841641	0.987422	0.946096	0.951079	cytoplasm	K01785	galM, GALM; aldose 1-epimerase [EC:5.1.3.3]
LmxM.34.1370	Iron-binding zinc finger CDGSH type, putative OS=Leishmania_mexicana_MHOM/GT/2001/U1103 GN=LmxM.34.1370	LmxM.34.1370	0.495519	0.0124803	Down	13.703	39.2	4	4	4	73536	73290	75474	195480	118430	118200	99776	181070	85052	65542	64404	67768	71867	69917	65413	46336	0	48152	0.822601	0.819849	0.84428	2.18671	1.3248	1.32223	1.11613	2.02552	0.951423	0.733177	0.720447	0.758078	0.803931	0.782117	0.731734	0.518331		0.538646	extracellular	K23886	CISD3; CDGSH iron-sulfur domain-containing protein 3
LmxM.34.1460	hypothetical protein, conserved OS=Leishmania_mexicana_MHOM/GT/2001/U1103 GN=LmxM.34.1460	LmxM.34.1460	0.642209	9.64583e-05	Down	35.732	40.1	13	13	13	373280	391450	395090	703840	716960	738680	601160	605140	604890	424380	422350	428270	430020	430530	401140	470310	469400	456270	0.741357	0.777444	0.784673	1.39787	1.42393	1.46706	1.19394	1.20185	1.20135	0.842845	0.838813	0.850571	0.854046	0.855059	0.796689	0.934065	0.932258	0.906181	plasma membrane
LmxM.34.1570	methyltransferase domain containing protein, putative OS=Leishmania_mexicana_MHOM/GT/2001/U1103 GN=LmxM.34.1570	LmxM.34.1570	0.652009	6.02801e-06	Down	40.105	44.5	13	13	13	259210	315440	283670	416310	432430	438240	479900	480590	480650	293350	300940	295090	416920	405640	371280	400780	422770	442360	0.672732	0.818667	0.736213	1.08046	1.12229	1.13737	1.24549	1.24728	1.24744	0.761336	0.781035	0.765852	1.08204	1.05276	0.963589	1.04015	1.09722	1.14806	cytoplasm
LmxM.34.1580	metacaspase, putative OS=Leishmania_mexicana_MHOM/GT/2001/U1103 GN=LmxM.34.1580	LmxM.34.1580	0.573446	6.01599e-05	Down	48.184	19.1	5	5	5	28387	35940	24617	65805	55816	50681	61150	51512	52452	33585	30869	32291	42556	36638	43711	44458	43391	36196	0.663545	0.840096	0.575421	1.53819	1.3047	1.18467	1.42938	1.20409	1.22606	0.785048	0.721561	0.754801	0.994745	0.856412	1.02174	1.0392	1.01426	0.84608	cytoplasm
LmxM.34.2150	short chain dehydrogenase, putative OS=Leishmania_mexicana_MHOM/GT/2001/U1103 GN=LmxM.34.2150	LmxM.34.2150	0.590161	1.938e-06	Down	48.175	57	19	19	19	806310	788480	764550	1562100	1527300	1545000	1329200	1383800	1340800	861210	870680	831830	995810	992800	994440	1198400	1234300	1212300	0.717099	0.701241	0.679959	1.38927	1.35832	1.37406	1.18214	1.23069	1.19245	0.765924	0.774347	0.739795	0.885632	0.882955	0.884414	1.06581	1.09774	1.07817	plasma membrane	K11169	DHRS13; dehydrogenase/reductase SDR family member 13 [EC:1.1.-.-]
LmxM.34.2560	cytochrome P450 reductase, putative OS=Leishmania_mexicana_MHOM/GT/2001/U1103 GN=LmxM.34.2560	LmxM.34.2560	0.468854	0.0326439	Down	90.97	14.3	9	9	9	50704	49868	45934	149700	150910	148390	61816	52639	53701	49664	41637	53377	70572	74344	76461	65999	71272	63489	0.685974	0.674663	0.62144	2.02529	2.04166	2.00757	0.836308	0.712152	0.72652	0.671903	0.563306	0.722136	0.954767	1.0058	1.03444	0.892899	0.964238	0.858942	Golgi apparatus	K00327	POR; NADPH-ferrihemoprotein reductase [EC:1.6.2.4]
LmxM.34.2740	galactokinase-like protein OS=Leishmania_mexicana_MHOM/GT/2001/U1103 GN=LmxM.34.2740	LmxM.34.2740	0.492543	1.52393e-08	Down	53.301	64.9	30	30	30	1430000	1425500	1504000	2874100	2874800	2904200	2636000	2670100	2601400	1382000	1333300	1363100	1589600	1547900	1517600	1163800	1159100	1151300	0.776991	0.774546	0.817199	1.56164	1.56202	1.578	1.43227	1.4508	1.41347	0.75091	0.724449	0.740641	0.86371	0.841052	0.824588	0.632351	0.629797	0.625559	cytoplasm	K00849	galK; galactokinase [EC:2.7.1.6]
LmxM.34.3220	hypothetical protein, conserved OS=Leishmania_mexicana_MHOM/GT/2001/U1103 GN=LmxM.34.3220	LmxM.34.3220	0.643978	0.00106394	Down	17.47	48.2	3	3	3	478490	543450	464400	432820	428130	480500	574310	513670	510920	331830	271860	343070	578670	516690	558390	529050	491010	462330	1.01213	1.14954	0.982327	0.915527	0.905606	1.01638	1.21482	1.08655	1.08073	0.701907	0.575055	0.725682	1.22404	1.09293	1.18114	1.11908	1.03861	0.977948	mitochondria
LmxM.34.3670	NADH-ubiquinone oxidoreductase B18 subunit (NDUFB7), putative OS=Leishmania_mexicana_MHOM/GT/2001/U1103 GN=LmxM.34.3670	LmxM.34.3670	0.521601	0.00894129	Down	26.515	41.8	6	6	6	0	86138	126910	397100	362200	383970	237280	236300	226320	128340	182200	170160	163090	177420	232670	149730	209480	197940		0.399304	0.588308	1.84081	1.67902	1.77994	1.09994	1.0954	1.04914	0.594937	0.844612	0.788799	0.756025	0.822453	1.07857	0.694093	0.971071	0.917576	cytoplasm
LmxM.34.3700	glycosomal membrane protein OS=Leishmania_mexicana_MHOM/GT/2001/U1103 GN=LmxM.34.3700	LmxM.34.3700	0.55082	0.0034065	Down	24.88	76	19	19	19	6336800	6214200	6219700	9850500	9302300	9118800	15417000	15406000	15349000	6836100	6644100	7022300	6961600	6745900	6786100	17706000	18805000	18429000	0.603025	0.591358	0.591881	0.937397	0.885229	0.867767	1.46712	1.46607	1.46065	0.650539	0.632268	0.668259	0.662482	0.641956	0.645781	1.68494	1.78953	1.75375	extracellular
LmxM.34.4340	hypothetical protein, conserved OS=Leishmania_mexicana_MHOM/GT/2001/U1103 GN=LmxM.34.4340	LmxM.34.4340	0.636498	3.34835e-06	Down	39.83	44.4	12	12	12	195920	200740	189540	289730	282730	316010	277360	266960	284200	184480	179810	182140	182740	193470	183820	221620	218580	217610	0.867018	0.888348	0.838784	1.28216	1.25118	1.39846	1.22742	1.1814	1.25769	0.816392	0.795725	0.806036	0.808691	0.856176	0.813471	0.98075	0.967297	0.963004	mitochondria
LmxM.34.4510	hypothetical protein, conserved OS=Leishmania_mexicana_MHOM/GT/2001/U1103 GN=LmxM.34.4510	LmxM.34.4510	0.6588	0.000211378	Down	25.658	25.1	4	4	4	129440	130440	76326	222050	220740	211040	187110	179460	190590	130230	142140	126530	135480	125650	127000	204220	220230	228840	0.779885	0.78591	0.45987	1.33787	1.32997	1.27153	1.12735	1.08126	1.14832	0.784645	0.856404	0.762352	0.816277	0.75705	0.765184	1.23044	1.3269	1.37878	mitochondria
LmxM.34.5220	hypothetical protein, conserved OS=Leishmania_mexicana_MHOM/GT/2001/U1103 GN=LmxM.34.5220	LmxM.34.5220	0.514999	0.00503836	Down	35.445	36.2	7	7	7	27023	37875	26051	38791	43584	46802	49068	43363	56917	33980	23109	14631	44906	48214	47523	38619	44466	47977	0.682304	0.956307	0.657762	0.979435	1.10045	1.1817	1.23892	1.09487	1.4371	0.857962	0.58348	0.369418	1.13383	1.21736	1.19991	0.975092	1.12272	1.21137	cytoplasm,nucleus
LmxM.36.0240	Afadin- and alpha -actinin-Binding, putative OS=Leishmania_mexicana_MHOM/GT/2001/U1103 GN=LmxM.36.0240	LmxM.36.0240	0.606001	0.0306998	Down	25.667	16.5	5	5	5	0	57322	80465	76661	85484	86975	47312	54193	56183	44754	30250	48259	50296	46139	46883	71371	70261	64018		0.958349	1.34527	1.28167	1.42918	1.45411	0.790995	0.906036	0.939306	0.748228	0.50574	0.806827	0.840883	0.771384	0.783822	1.19323	1.17467	1.0703	nucleus
[truncated: 11 more rows]
[truncated: 9 more columns]

## Sheet: DAC4 vs Control Upreg PTN
DAC4-/- Upregulated proteins compared to Cas9 parasites
[truncated: 121 more rows]
[truncated: 9 more columns]

## Sheet: DAC4 vs Control Downreg PTN
DAC4-/- Downregulated proteins compared to Cas9 parasites
[truncated: 184 more rows]
[truncated: 9 more columns]

## Sheet: DAC5 vs Control Upreg PTN
DAC5-/- Upregulated proteins compared to Cas9 parasites
[truncated: 631 more rows]
[truncated: 9 more columns]

## Sheet: DAC5 vs Control Downreg PTN
DAC5-/- Downregulated proteins compared to Cas9 parasites
[truncated: 625 more rows]
[truncated: 9 more columns]
