# Supplementary material for: AcetyLeish: acetylation-driven control of stage differentiation and virulence in Leishmania mexicana
Source: Research Square preprint supplement (doi:10.21203/rs.3.rs-7520632/v1), 2025-09-17
Supplement: Supplementary file 4 [file 653bdeb3070ba0ceb879b922.xlsx]

## Sheet: Sup. Table 2
Supplementary Table 2. List of PCR primers for knockout and add-back parasites confirmation.
	Gene	ID	Knockout primers foward (above) and reverse (below)
	DAC1	LmxM.21.0680	GATTCCACCATGCGTGCG
			GAGCACGATGTCGTTCACGTA
	DAC3	LmxM.21.1870	CTCTGGGCCAGCCTCCTC
			ACCCTGTATGCCCATGAAGAAGTC
	DAC4	LmxM.08.1090	GACTAAAGCGATTCTGCCTG
			CAGCAGCTCGACAGGCAGAA
	DAC5	LmxM.24.1370	TACACGGGCGTGCTGATGACA
			GCCGCAGGCATTCCAAGTACG
	BSD	Resistance	GAATCCACCCTCATTGAAAGAGC
			CACTATCGCTTTGATCCCAGGA
	PAC	Resistance	ATGACTGAATACAAGCCAACGGTTC
			CACCATGTCCTCGGCGGTTCA
	G418	Resistance	AGAGGCTATTCGGCTATGA
			GGTCAGCCCATTCGCCGC
All sequences are written in the 5’ to 3’ orientation.
