# Supplementary material for: AcetyLeish: acetylation-driven control of stage differentiation and virulence in Leishmania mexicana
Source: Research Square preprint supplement (doi:10.21203/rs.3.rs-7520632/v1), 2025-09-17
Supplement: Supplementary file 5 [file a869a445734376bfbe664f62.xlsx]

## Sheet: DAC1 vs Control_Top30 DE PTNs
Supplementary Table 6. Top 30 DE proteins in DACs mutants compared to Cas9 cells.
Gene ID	Description	Up/Down	Log2FC
LmxM.29.1625	Protein of unknown function (DUF1077), putative	Down	-1.76
LmxM.32.1460	RNA recognition motif. (a.k.a. RRM, RBD, or RNP domain), putative	Down	-1.46
LmxM.10.0390	GP63, leishmanolysin	Down	-1.42
LmxM.30.1570	cytochrome c oxidase VIII (COX VIII), putative	Down	-1.15
LmxM.34.0620	hypothetical protein, unknown function	Down	-1.03
LmxM.28.2170	Mitochondrial import receptor subunit ATOM69, putative	Down	-0.99
LmxM.16.0570	histone H3	Down	-0.98
LmxM.34.2740	galactokinase-like protein	Down	-0.93
LmxM.34.2150	short chain dehydrogenase, putative	Down	-0.85
LmxM.34.0720	hypothetical protein, conserved	Down	-0.82
LmxM.26.2230	GDP-mannose 4,6 dehydratase, putative	Down	-0.71
LmxM.02.0460	Mitochondrial outer membrane protein porin, putative	Down	-0.68
LmxM.17.1120	hypothetical protein, conserved	Down	-0.68
LmxM.36.0260	xylulokinase, putative	Down	-0.61
LmxM.26.0680	Protein of unknown function (DUF2012), putative	Down	-0.6
LmxM.34.0100	ubiquinol-cytochrome c reductase complex 14kD subunit, putative	Down	-0.59
LmxM.21.0200	major vault protein-like protein	Up	0.61
LmxM.27.1310	arginyl-tRNA synthetase, putative	Up	0.64
LmxM.02.0580	hypothetical protein, conserved	Up	0.64
LmxM.27.2330	GTP binding protein, putative	Up	0.65
LmxM.05.0310	glutaredoxin-like protein	Up	0.68
LmxM.05.1210	protein phosphatase type 1 regulator-like protein	Up	0.71
LmxM.28.1930	Zinc transporter 3, putative	Up	0.71
LmxM.08_29.0251	thymine-7-hydroxylase, putative	Up	0.8
LmxM.30.1190	cytochrome b5-like Heme/Steroid binding domain containing protein, putative	Up	0.8
LmxM.04.0190	surface antigen-like protein	Up	0.83
LmxM.17.0990	hypothetical protein, conserved	Up	0.97
LmxM.36.6080	rab-like GTPase activating protein, putative	Up	1.52
LmxM.31.3650	hypothetical protein	Up	2.06
LmxM.31.0470	hypothetical protein, conserved	Up	2.15

## Sheet: DAC3 vs Control_Top30 DE PTNs
Supplementary Table 6. Top 30 DE proteins in DACs mutants compared to Cas9 cells.
Top 30 DE proteins DAC3
Gene ID	Description	Up/Down	Log2FC
LmxM.21.0023	ring-box protein 1, putative	Down	-1.31
LmxM.29.1625	Protein of unknown function (DUF1077), putative	Down	-1.21
LmxM.34.2740	galactokinase-like protein	Down	-1.21
LmxM.10.0390	GP63, leishmanolysin	Down	-1
LmxM.36.0260	xylulokinase, putative	Down	-0.9
LmxM.29.1510	p1/s1 nuclease	Down	-0.77
LmxM.17.1120	hypothetical protein, conserved	Down	-0.76
LmxM.02.0460	Mitochondrial outer membrane protein porin, putative	Down	-0.71
LmxM.23.0070	agmatinase-like protein	Down	-0.7
LmxM.08.0860	hypothetical protein, unknown function	Down	-0.64
LmxM.23.0700	hypothetical protein, conserved	Down	-0.61
LmxM.34.0100	ubiquinol-cytochrome c reductase complex 14kD subunit, putative	Down	-0.61
LmxM.36.1160	AmmeMemoRadiSam system protein B, putative	Down	-0.6
LmxM.03.0030	D-3-phosphoglycerate dehydrogenase-like protein	Up	0.6
LmxM.16.1340	hypothetical protein, conserved	Up	0.61
LmxM.20.0070	hypothetical protein, conserved	Up	0.61
LmxM.03.0430	60S acidic ribosomal protein P2, putative	Up	0.61
LmxM.05.0830	methylthioadenosine phosphorylase, putative	Up	0.68
LmxM.05.1210	protein phosphatase type 1 regulator-like protein	Up	0.7
LmxM.07.0280	HECT E3 ligase, putative	Up	0.7
LmxM.30.1520	hypothetical protein, conserved	Up	0.72
LmxM.26.0310	6-phosphofructo-2-kinase/fructose-2,6-biphosphatase-1-like protein	Up	0.74
LmxM.03.0770	Ubiquitin-like domain containing protein, putative	Up	0.77
LmxM.03.0690	DEAD/DEAH box helicase, putative	Up	0.8
LmxM.17.0990	hypothetical protein, conserved	Up	0.96
LmxM.19.1530	peptidylprolyl isomerase-like protein	Up	1.04
LmxM.30.1190	cytochrome b5-like Heme/Steroid binding domain containing protein, putative	Up	1.18
LmxM.36.6080	rab-like GTPase activating protein, putative	Up	1.48
LmxM.30.3070	ferrous iron transport protein	Up	1.51
LmxM.28.1930	Zinc transporter 3, putative	Up	1.65

## Sheet: DAC4 vs Control_Top30 DE PTNs
Supplementary Table 6. Top 30 DE proteins in DACs mutants compared to Cas9 cells.
Top 30 DE proteins DAC4
Gene ID	Description	Up/Down	Log2FC
LmxM.08.0650	DnaJ domain containing protein, putative	Down	-1.52
LmxM.24.1850	hypothetical predicted multi-pass transmembrane protein	Down	-1.36
LmxM.25.1120	aldehyde dehydrogenase, mitochondrial precursor	Down	-1.06
LmxM.10.0390	GP63, leishmanolysin	Down	-1.03
LmxM.11.0750	hypothetical protein, conserved	Down	-0.87
LmxM.34.2740	galactokinase-like protein	Down	-0.83
LmxM.30.1570	cytochrome c oxidase VIII (COX VIII), putative	Down	-0.76
LmxM.27.0060	hypothetical protein, conserved	Down	-0.75
LmxM.29.0770	hypothetical protein, conserved	Down	-0.73
LmxM.23.0510	hypothetical protein, conserved	Down	-0.71
LmxM.34.1460	hypothetical protein, conserved	Down	-0.65
LmxM.34.4510	hypothetical protein, conserved	Down	-0.64
LmxM.24.0640	Kinesin-13 3, putative	Down	-0.62
LmxM.34.4340	hypothetical protein, conserved	Down	-0.62
LmxM.08_29.2050	hypothetical protein, conserved	Up	0.62
LmxM.28.1930	Zinc transporter 3, putative	Up	0.63
LmxM.20.1120	phosphatidylinositol 3-kinase, putative	Up	0.63
LmxM.33.0240	hypothetical protein, conserved	Up	0.65
LmxM.05.0820	hypothetical protein, conserved	Up	0.64
LmxM.05.0350	trypanothione reductase	Up	0.67
LmxM.05.1210	protein phosphatase type 1 regulator-like protein	Up	0.68
LmxM.05.0830	methylthioadenosine phosphorylase, putative	Up	0.69
LmxM.10.0090	dehydrogenase-like protein	Up	0.74
LmxM.31.3930	HECT E3 ligase, putative	Up	0.87
LmxM.04.0190	surface antigen-like protein	Up	0.99
LmxM.16.1110	Polyketide cyclase / dehydrase and lipid transport, putative	Up	1
LmxM.36.6080	rab-like GTPase activating protein, putative	Up	1.13
LmxM.17.0610	Acyl CoA binding protein, putative	Up	1.26
LmxM.31.3650	hypothetical protein	Up	1.87
LmxM.36.3390	ribosomal protein L29, putative	Up	2.27

## Sheet: DAC5 vs Control_Top30 DE PTNs
Supplementary Table 6. Top 30 DE proteins in DACs mutants compared to Cas9 cells.
Top 30 DE proteins DAC5
Gene ID	Description	Up/Down	Log2FC
LmxM.33.0070	ascorbate peroxidase, putative	Down	-2.77
LmxM.24.0640	Kinesin-13 3, putative	Down	-1.78
LmxM.08_29.0251	thymine-7-hydroxylase, putative	Down	-1.64
LmxM.24.2110	3-hydroxy-3-methylglutaryl-CoA synthase, putative	Down	-1.2
LmxM.08_29.1570	metallo-peptidase, Clan MH, Family M18, glutamamyl carboxypeptidase, putative	Down	-0.97
LmxM.26.0300	aminopeptidase-like protein, metallo-peptidase, Clan MA(E), Family M1	Down	-0.93
LmxM.33.0010	short chain dehydrogenase, putative	Down	-0.85
LmxM.13.1100	leucyl-tRNA synthetase, putative	Down	-0.81
LmxM.15.1420	mismatch repair protein MSH3, putative	Down	-0.77
LmxM.21.1080	cdc2-related kinase, cell division protein kinase 2	Down	-0.75
LmxM.33.3520	peroxisome biosynthesis protein-like protein	Down	-0.7
LmxM.10.0200	Mitogen-activated protein kinase 10, putative	Down	-0.62
LmxM.20.0100	phosphoglycerate kinase C, glycosomal	Up	0.6
LmxM.18.0580	peroxisomal enoyl-coa hydratase, putative	Up	0.63
LmxM.23.0700	hypothetical protein, conserved	Up	0.63
LmxM.23.1580	Nucleoside 2-deoxyribosyltransferase, putative	Up	0.63
LmxM.23.0690	3-ketoacyl-CoA thiolase-like protein	Up	0.7
LmxM.25.1340	protein transport protein Sec24C, putative	Up	0.7
LmxM.32.1490	hypothetical protein, conserved	Up	0.74
LmxM.36.6350	poly(A)-specific ribonuclease PARN, putative	Up	0.78
LmxM.30.1870	mannosyltransferase-like protein	Up	0.8
LmxM.36.4170	oxidoreductase, putative	Up	0.81
LmxM.11.0100	seryl-tRNA synthetase	Up	0.85
LmxM.28.2910	glutamate dehydrogenase, putative	Up	0.94
LmxM.07.0280	HECT E3 ligase, putative	Up	1.01
LmxM.20.0970	1,2-Dihydroxy-3-keto-5-methylthiopentene dioxygenase, putative	Up	1.07
LmxM.07.0940	Domain of unknown function (DUF3437), putative	Up	1.16
LmxM.30.1260	Microtubule-binding stalk of dynein motor, putative	Up	1.33
LmxM.17.0610	Acyl CoA binding protein, putative	Up	2.09
LmxM.23.0840	hypothetical protein, unknown function	Up	2.67
