# Supplementary material for: AcetyLeish: acetylation-driven control of stage differentiation and virulence in Leishmania mexicana
Source: Research Square preprint supplement (doi:10.21203/rs.3.rs-7520632/v1), 2025-09-17
Supplement: Supplementary file 6 [file bdbc7bef0f6d4e41a3a0eec5.xlsx]

## Sheet: Sup Table 3
Supplementary Table 3. List of RT-qPCR primers for knockout and add-back parasites confirmation.
	Gene	ID	Primers foward (above) and reverse (below)
	DAC1	LmxM.21.0680	GTGGCTCTTTCAGGACTCG
			TGGATGAGGTTGAATGTGGG
	DAC3	LmxM.21.1870	CTATGCTAGATCACGTTTCTCCG
			GCTCGTGTTTCTTTGCAGTG
	DAC4	LmxM.08.1090	GGGAAAGCTAGTGGATAAAGGAG
			GGTGATGTCGGGAGGTTG
	DAC5	LmxM.24.1370	TCTTCAACAGCAAGCGAGG
			ATCAAATGACCCTCCGCATAG
	GAPDH	LmxM.29.2980	AGGAGATCGACAAGGCCATCAAGA
			ACGACACGATCTTGAAGAACCGCT
	H4	LmxM.36.0020	TACTGAAGGCCTACGTGGAG
			AGCGCATTCACAACATCGG
	Sherp	LmxM.23.1061	AAGGGACCAGATGAGCAACG
			CACCATCCTTCAGCTCCTGG
	Amastin	LmxM.08.0840	GCTCGCAGTCATTTCCATTT
			GATGTTGAGCATCAGGCAAA
	SL-20	Spliced leader	ACAGTTTCTGTACTATATTG
	Intracellular amastigote	kinetoplast DNA	CCTATTTTACACCAACCCCCAGT
			GGGTAGGGGCGTTCTGCGAAA
All sequences are written in the 5’ to 3’ orientation.
