# Supplementary material for: AcetyLeish: acetylation-driven control of stage differentiation and virulence in Leishmania mexicana
Source: Research Square preprint supplement (doi:10.21203/rs.3.rs-7520632/v1), 2025-09-17
Supplement: Supplementary file 7 [file d105ce7d1c312069d5efb96e.xlsx]

## Sheet: T7-vs-DAC1_down
Supplementary Table 4. List of DE genes in DACs mutants compared to parental cells.
T7-vs-DAC1_down
	baseMean	log2FoldChange	lfcSE	stat	pvalue	padj
LmxM.31.0840	2858.67111603658	-1.18526376443593	0.151096126285886	-7.84443515244932	4.3490656281564505e-15	1.98679814779614e-13
LmxM.02.0650	867.264063350466	-0.628148997066276	0.172972208723349	-3.63150243442247	0.0002817759989315	0.001237076369041
LmxM.34.4760	612.919187205059	-0.877015551310341	0.252485321777	-3.47353083790327	0.0005136583328762	0.0020603963274346
LmxM.27.1410	282.22635916885	-0.731280324673554	0.191554235690236	-3.81761500620699	0.0001347479795582	0.0006472153247125
LmxM.32.1140	1456.61036839114	-1.40790381199571	0.0874326681390768	-16.1027204357552	2.44130569709733e-58	1.00374283736157e-54
LmxM.36.6060	3159.39339152332	-0.629043343337011	0.138940580142821	-4.52742706767454	5.9706197551883e-06	4.11192682134953e-05
LmxM.36.1750	1651.50336274302	-1.1767909436519	0.134249827020334	-8.7656794036216	1.85653634634792e-18	1.57384519340402e-16
LmxM.30.2600	6110.86338945835	-1.73326668269689	0.163570238075056	-10.5964673225062	3.09449498722572e-26	6.52462366152745e-24
LmxM.19.1160	4407.38430887876	-0.856835235576536	0.198653589595085	-4.31321295186773	1.60899002562988e-05	9.88843421581052e-05
LmxM.09.1070	3035.23451115013	-0.712189958379371	0.123055208144815	-5.78756453397114	7.14142549282639e-09	9.86957005504394e-08
LmxM.09.0410	479.731061662819	-0.622476791588072	0.182695539981333	-3.40718110388286	0.0006563755928725	0.0025339795775543
LmxM.31.1160	1004.2843697344	-0.62789188129339	0.126240258997022	-4.97378479957175	6.56581949529927e-07	5.86218607055873e-06
LmxM.26.0680	2502.47498476308	-0.728530558316938	0.160620985986029	-4.53571215395421	5.74094353632043e-06	3.97037667781017e-05
LmxM.04.0670	1977.05693463079	-0.691978952970133	0.102449485284678	-6.7543428944257	1.43484048064041e-11	3.50109592650031e-10
LmxM.09.0100	1448.27270092073	-0.885396157283851	0.16985774054173	-5.21257467843409	1.86237557042098e-07	1.86928640828024e-06
LmxM.02.0400	119.601799951517	-0.631940652966644	0.252632785126262	-2.50141980840219	0.0123696452434923	0.0307390730846894
LmxM.05.0490	837.041770265199	-0.73559843034712	0.0903138022206955	-8.14491708088619	3.79541909122457e-16	2.0806487458093102e-14
LmxM.24.0770	1985.17451307779	-1.37924820552607	0.206607358669135	-6.67569739243814	2.46059225309389e-11	5.66763308044567e-10
LmxM.22.0470	1480.13569167269	-0.638593677208319	0.113406254817197	-5.6310269503008	1.79139729101586e-08	2.23870211611298e-07
LmxM.25.0820	1882.13948797214	-0.838135405460763	0.12634519613186	-6.63369428455394	3.27387557836648e-11	7.31551056546402e-10
LmxM.14.0150	970.142548013227	-0.642087961668179	0.140109420053893	-4.5827608266539	4.588767925219e-06	3.25008084832695e-05
LmxM.36.0020	10245.0691394255	-1.06209110762024	0.343958492409794	-3.08784673458466	0.0020161242141367	0.0066500559217195
LmxM.08_29.0620	1810.02528153324	-1.22587459592408	0.428307062973202	-2.86213957671947	0.0042079155221488	0.0124198454194653
LmxM.28.0630	368.062892030378	-0.679932755037916	0.282783616324702	-2.40442768175506	0.0161978107365903	0.03848442579803
LmxM.22.0210	2004.5125734753	-0.693669261158957	0.124696851885596	-5.56284501709287	2.65411591778523e-08	3.1814570250653e-07
LmxM.29.1220	823.905557806473	-0.670578986751665	0.197169103561429	-3.40103482056327	0.0006713127614722	0.0025843655606677
LmxM.29.3040	4099.38250966791	-1.10764271102016	0.184504578751937	-6.00333454330889	1.9330574381554304e-09	2.98788182593085e-08
LmxM.34.0160	200.7579463964	-0.607832831346799	0.203027897928854	-2.99383896276067	0.002754913080279	0.0086398361018821
LmxM.36.6920	624.911061207881	-0.915246551714848	0.114354490216589	-8.00359085140738	1.20842448742493e-15	6.2105466000595e-14
LmxM.26.0330	713.00652254528	-1.17427357887778	0.192398081972082	-6.10335387360137	1.0386552791064e-09	1.70136700400237e-08
LmxM.24.2230	3196.74384075331	-1.29283398390054	0.221877759887139	-5.82678491327009	5.650536083925481e-09	7.99730778280881e-08
LmxM.25.1130	1740.96384407683	-0.864723086975922	0.152493335324166	-5.67056314387587	1.4232889906908e-08	1.82585107183314e-07
LmxM.29.3600	2800.13346844159	-0.833064830963236	0.0972943327730441	-8.56231608994642	1.10622414438061e-17	8.142037608862901e-16
LmxM.27.2330	4324.54796952267	-1.63716056804036	0.217409608370017	-7.53030457262047	5.06221033913622e-14	1.92715535271839e-12
LmxM.21.1558	923.094291792173	-0.648893949393081	0.0845219820982093	-7.67722115933233	1.62576619419643e-14	6.75185627014001e-13
LmxM.27.0070	2022.2709950226	-0.79301604069707	0.168360983503033	-4.71021268821933	2.47458416836815e-06	1.8754383056674e-05
LmxM.27.1710	2023.03135550952	-1.79559362743832	0.206706010834798	-8.68670253074248	3.73111456010225e-18	2.96285941692654e-16
LmxM.19.1190	351.154908024358	-0.925688083570974	0.135623775960801	-6.82541152547268	8.76736214593221e-12	2.26290250336699e-10
LmxM.05.0510	45.1106827175629	-1.50019700528649	0.408029871849684	-3.67668425472328	0.0002362852046635	0.001063477415407
LmxM.29.3240	3016.04160170543	-0.961172152134673	0.114510140784645	-8.39377321125046	4.70783852148006e-17	3.04823276867169e-15
LmxM.22.1250	1348.41129723265	-0.876580166301506	0.134767644712569	-6.50438143495843	7.801371809694289e-11	1.6059421941898402e-09
LmxM.36.5365	476.903346117825	-0.733509250182569	0.210379403922779	-3.48660199860538	0.0004891987955437	0.0019796661888563
LmxM.36.0830	1018.21961029764	-0.735579951522388	0.150187505024464	-4.89774399942639	9.69432186804713e-07	8.21991577874108e-06
LmxM.18.0510	1679.69646366601	-1.13289003004407	0.440804852707186	-2.57004890732592	0.0101684158403833	0.0259592932180913
LmxM.20.0560	1104.26073818563	-1.29372520342384	0.196563849739262	-6.58170464782786	4.6508478049325197e-11	1.00641898684106e-09
LmxM.30.2630	476.160393223584	-0.825101597796231	0.179746772015501	-4.59035557937627	4.42491538766001e-06	3.15042223406545e-05
LmxM.30.3060	510.99683211954	-1.07263182822775	0.308472832283248	-3.47723272836823	0.0005066178651356	0.0020413950669736
LmxM.27.0110	4083.13769834943	-0.944566817378926	0.214774485504876	-4.39794706134907	1.09279624000022e-05	7.0812162974955e-05
LmxM.17.0980	3238.13659279005	-0.885837942727145	0.113157718555203	-7.8283474961984	4.9432408029874305e-15	2.20914506103074e-13
LmxM.36.2660	2349.46193012218	-1.1096317393595	0.196802241030822	-5.63830845394549	1.71728698166894e-08	2.15921266823604e-07
LmxM.27.2300	2009.50355940136	-0.914238919212015	0.0917493125633581	-9.96453154437186	2.17898656342811e-23	3.3807182096357203e-21
LmxM.21.1800	764.362186751458	-0.930791778158192	0.102055956962295	-9.12040615622346	7.48433095693e-20	7.692956682354419e-18
LmxM.01.0490	2480.6591224466	-0.66718649190513	0.118922817484104	-5.61024794080674	2.02036943203089e-08	2.47962654322239e-07
LmxM.26.0700	315.443271202969	-0.953980403191354	0.143753064135189	-6.63624395716677	3.2177712103821794e-11	7.24924182547196e-10
LmxM.24.1500a	145.393183692651	-1.06918520693921	0.28391064174861	-3.76592156022784	0.0001659358859445	0.0007770448690901
LmxM.33.0170	1575.19902857136	-0.811806813028581	0.146370890663255	-5.54623128512792	2.9189266189097e-08	3.48364783560152e-07
LmxM.11.0630	1400.22812683981	-0.941066020705201	0.205090154396344	-4.5885480142872	4.46339654585152e-06	3.16947407569405e-05
LmxM.34.4880	1160.52959433122	-0.759418562581018	0.109448278767149	-6.93860672031839	3.95985798409169e-12	1.0926816175565801e-10
LmxM.11.0330	718.917419308458	-0.778804240742408	0.226358306996036	-3.44058166487368	0.0005804652371318	0.0022838113133659
LmxM.21.1090	5359.99586410964	-1.43285188145133	0.194282294823966	-7.3751027223021	1.64218384372372e-13	5.74624584976177e-12
LmxM.33.0961	453.66802181192	-0.610153592506614	0.20348257777236	-2.99855446685566	0.0027126366484472	0.0085235044555526
LmxM.28.1490	1724.21109406673	-0.758493907225451	0.154404374528611	-4.91238612598313	8.99746404951171e-07	7.69086765895372e-06
LmxM.25.0010	112.399368474672	-1.33088609407894	0.530142779137113	-2.51042954172677	0.0120584383266163	0.030065657477188
LmxM.24.1630	4995.52277802708	-0.809208784057808	0.095886099386914	-8.43927106464656	3.19322780388992e-17	2.10063297851094e-15
LmxM.24.0090	557.760569173474	-0.750526671419428	0.121772101835262	-6.1633712493094	7.12122833297252e-10	1.20987315252134e-08
LmxM.28.0130	557.837386594207	-0.76922170422744	0.181525215686959	-4.23754739150932	2.25974731250935e-05	0.0001326331345522
LmxM.18.1510	1953.60027912182	-1.33772446197709	0.225223999326469	-5.93952893997774	2.85842216057525e-09	4.27360098662005e-08
LmxM.05.0030	2709.29735313084	-0.680160800030721	0.0982884205586866	-6.92005015610772	4.51483767417352e-12	1.22932152962678e-10
LmxM.27.2060	1057.68344616468	-0.726207610317198	0.143463932549711	-5.0619524880622	4.14984455691578e-07	3.89990534760211e-06
LmxM.32.2060	1327.38873094464	-0.685443892093944	0.126175325426257	-5.43247175926285	5.55787517606133e-08	6.20114078327711e-07
LmxM.33.3980	1304.10704101389	-1.03839779967529	0.10512834236514	-9.87742959047756	5.2153507477598804e-23	7.94182022200547e-21
LmxM.17.0140	1099.4404808594	-0.681293315390197	0.103775968250361	-6.56503935233413	5.20191226253066e-11	1.10816902939869e-09
LmxM.31.0890	1325.55307748832	-0.825846363404883	0.0742845843111078	-11.1173316922148	1.03315839102685e-28	3.3982645797655096e-26
LmxM.25.2140	282.476751907674	-1.73814610587758	0.398466046972621	-4.36209338056099	1.28823860449718e-05	8.18609757423372e-05
LmxM.29.3150	1393.90178185564	-0.756499214662957	0.100582272565559	-7.52119827248758	5.42764643983766e-14	2.0567528421559898e-12
LmxM.36.0550	1461.19117864722	-0.63916056388308	0.174369935179191	-3.66554339328191	0.0002468139551571	0.0011048182652463
LmxM.33.1330	679.597907076992	-0.656280778474643	0.0932607053150065	-7.03705570591521	1.96344374082523e-12	5.7456931960163196e-11
LmxM.19.0020	5160.06210246056	-0.707588814457507	0.0891624795692499	-7.93594814630456	2.08893278751835e-15	1.01640794744162e-13
LmxM.36.4780	1556.12455270311	-0.609650309145005	0.153171719443005	-3.9801753963587	6.88644394250531e-05	0.0003574951296668
LmxM.18.0140	1178.42132533347	-0.738487643757951	0.189630732044291	-3.89434579404286	9.84641058319167e-05	0.0004925002081848
LmxM.14.1360	2744.56973717163	-1.4728691704934	0.165706181068201	-8.88843832498439	6.197377009489581e-19	5.7259585560711e-17
LmxM.27.1090	1278.53147085785	-1.00387718801803	0.0945524097101797	-10.6171507536941	2.48015912361805e-26	5.36693380881874e-24
LmxM.36.6090	1024.41198417725	-1.17435574191997	0.116412595691124	-10.0878752419186	6.25078537000318e-24	1.0280041619507201e-21
LmxM.31.0950	990.225625424383	-0.732706599087478	0.240715697812627	-3.04386712518357	0.0023355827355731	0.00752861498809
LmxM.34.1300	2032.3574829446	-1.16495483752463	0.41380218685212	-2.81524572498441	0.0048739950486442	0.0140479710077118
LmxM.36.5810	890.43162091731	-0.614474592342812	0.176112202911512	-3.48910854662101	0.0004846343084029	0.0019621604716873
LmxM.14.0705	464.651373951405	-1.1779323654081	0.319306874409591	-3.68902914347253	0.0002251114345421	0.0010187624250084
LmxM.27.2020	4197.44288298106	-0.742486156791496	0.293603457600527	-2.52887402232746	0.0114429091420503	0.0287840446237625
LmxM.32.0765	383.710605697136	-0.620333104102339	0.25723276030861	-2.41156337691243	0.0158842909267518	0.0378598621132407
LmxM.36.3470	2337.13997455331	-0.678627711689926	0.194062175383638	-3.49696024147085	0.0004705919624835	0.0019128411801791
LmxM.08_29.1240	3371.11255033386	-0.869709035664835	0.103935376793808	-8.36778643127648	5.87106788420065e-17	3.7136762470601504e-15
LmxM.19.1060	1018.48119244424	-0.751698567917307	0.222972434851235	-3.37126231957252	0.0007482457324762	0.0028458948465087
LmxM.20.0630	782.776256772152	-0.744699560004916	0.154355723443847	-4.82456719705525	1.40307608425068e-06	1.12780983780971e-05
LmxM.11.0240	2849.05594973886	-0.771438426190704	0.143384350537462	-5.38021355398302	7.4397530387703e-08	8.13091106376037e-07
LmxM.14.0120	690.251362762618	-0.76059878295782	0.166433849310428	-4.56997651685128	4.87778868671444e-06	3.431142546694e-05
LmxM.26:ncRNA:rfamscan:160631-160741	2922.69405456371	-0.835766948119618	0.222089439520276	-3.76319986184358	0.0001677530288033	0.0007842144149232
LmxM.34.3360	1279.64044136166	-0.782147970979925	0.127576181906912	-6.13083068711549	8.742140335083301e-10	1.46111016210142e-08
LmxM.12.1130	1843.71224106503	-1.47855017079957	0.191715155878091	-7.71222371036619	1.23644146385213e-14	5.24085472023508e-13
LmxM.12.0260	1477.7462589864	-0.742040977005328	0.0803906038754272	-9.23044412199205	2.69512078713215e-20	2.99565927070887e-18
LmxM.29.2980	6220.81011627378	-0.618559440998351	0.254032601234707	-2.43496085932234	0.0148934006222037	0.0359566744910102
LmxM.32.2290	226.536459961823	-1.13016058893365	0.35072778961185	-3.22232974519756	0.0012715270830572	0.0044816833278952
LmxM.21.1770	5208.80166035783	-0.701647849671309	0.13986929478765	-5.01645375946559	5.26339367230366e-07	4.80364996308024e-06
LmxM.31.1960	2035.13604172489	-1.25330239231717	0.219672960450483	-5.70531024731957	1.16131366231595e-08	1.52061819191465e-07
LmxM.34.4700	1645.07444172787	-0.636451781735425	0.129044774273311	-4.93202289917954	8.13823732773622e-07	7.05170975194678e-06
LmxM.08_29.0880	4078.46337906039	-0.648573847730714	0.178727178976645	-3.62884845743279	0.0002846882894232	0.0012479641527367
LmxM.18.0300	2133.25178175716	-0.736416357596077	0.108709978001701	-6.77413767469028	1.25150454166599e-11	3.09042698081665e-10
LmxM.24.2220	1248.13461479303	-0.78990903768005	0.142400342711582	-5.54710067854214	2.90445515019498e-08	3.47141492733333e-07
LmxM.33.3440	1231.6308637417	-1.22549646854941	0.110957813044424	-11.0447064061975	2.32526517329767e-28	7.08172426667657e-26
LmxM.29.0300	494.931549007779	-0.649973697258626	0.177392977983356	-3.66403284192913	0.0002482749299119	0.0011107533997092
LmxM.21.1040	1622.12268573766	-1.15193672832941	0.467829857012404	-2.4622984426128	0.0138049741492609	0.0338053312773593
LmxM.14.0190	5272.29968783281	-0.62883056492036	0.0659817108643857	-9.53037677687405	1.56713410617883e-21	2.0454831357315102e-19
LmxM.18.1380	2437.60484255608	-1.28118569114497	0.197174297922627	-6.49773172590538	8.15400396700467e-11	1.6720791675979902e-09
LmxM.34.0900	1746.62754982061	-0.638359186041464	0.0823829377486447	-7.7486819903065	9.28512257747561e-15	3.99746402903571e-13
LmxM.07.1090	1092.68906985636	-0.804304701341347	0.108776589084746	-7.39409746259581	1.42371960517306e-13	5.13475715497285e-12
LmxM.31.3310	4227.88210706156	-1.27248028489398	0.188214519990116	-6.76079765238514	1.3723407820771e-11	3.3685845525432703e-10
LmxM.28.1950	452.348953206228	-1.1443861070264	0.264640261919665	-4.32430839784233	1.53011122356363e-05	9.45312140598329e-05
LmxM.13.0160	1462.72681259644	-0.608050310041246	0.247087156935038	-2.46087379685667	0.0138599110041307	0.0339095650660418
LmxM.24.0530	470.418847566384	-0.747424829974268	0.15816160389068	-4.72570340454363	2.29320157325669e-06	1.75904818441136e-05
LmxM.08_29.0530	1040.3530473362	-0.614535970391538	0.180300253624258	-3.40840324979364	0.0006534425245519	0.0025250271989619
LmxM.26.2640	595.006525476953	-1.06523662921769	0.229053472188891	-4.65060240754276	3.30966848914488e-06	2.41485394731485e-05
LmxM.36.0480	3252.8554041698	-0.876368758313749	0.158910977184916	-5.51484091180162	3.49095594665365e-08	4.0891924144349e-07
LmxM.36.6995	2450.13364076309	-0.826658415271431	0.223181446531863	-3.7039746274492	0.0002122474968171	0.000966395994644
LmxM.26.0660	2265.77908618266	-0.731243061623398	0.0957660430782647	-7.63572387579792	2.24555131984224e-14	9.18665099654862e-13
LmxM.36.2500	1250.94727515582	-0.686093940893452	0.141961623096171	-4.83295362457686	1.34522132729178e-06	1.08982807628771e-05
LmxM.02.0710	3202.92121413595	-0.684826958628357	0.101541423816011	-6.74431116771846	1.5375470967574e-11	3.7186028754812003e-10
LmxM.36.1840	976.695296417533	-0.804249183298697	0.116394475245629	-6.90968520285415	4.85730355635161e-12	1.3182048562336401e-10
LmxM.04.0310	648.554667025171	-1.97207181863244	0.296014454214085	-6.6620794713159	2.6997996068644398e-11	6.18396996302124e-10
LmxM.34.2570	654.049338301909	-0.669067675295474	0.149012247479223	-4.49001801270573	7.12171508901439e-06	4.82387670320966e-05
LmxM.04.0320	68.0844958938686	-1.14563333148418	0.374986979937496	-3.05512829185467	0.0022496426932039	0.0072973616829255
LmxM.24.1210	1030.12127249563	-1.13799164435907	0.129995633020799	-8.7540759478974	2.05782494101147e-18	1.70924186767044e-16
LmxM.27.0090	1899.00417129714	-0.645079403238323	0.102215956115786	-6.31094623336108	2.77334539386164e-10	5.0342647182614205e-09
LmxM.09.0930	2279.71426399011	-1.61948994822361	0.140415448629453	-11.5335596191935	8.93705021344288e-31	3.84722547113548e-28
LmxM.29.1590	2954.98439903651	-0.643951040461706	0.177190607190943	-3.63422785592566	0.000278814379523	0.0012266937628773
LmxM.10.0890	4631.44804425485	-1.0150552007831	0.210232460180645	-4.82825154550776	1.37737040873741e-06	1.10931605005365e-05
LmxM.22.1410	1911.55826697614	-0.618856624172014	0.0922668429847185	-6.70724828283667	1.9832865985981e-11	4.65959020007777e-10
LmxM.03.0180	457.995811195697	-0.787709431702124	0.236948513198116	-3.32439069175973	0.0008861196271156	0.0032866764518592
LmxM.19.1110	801.757002523993	-0.752555884415653	0.117553515523119	-6.4018152163867	1.53540425990189e-10	2.9637627298528802e-09
LmxM.36.5150	1072.19504205584	-1.0110216841554	0.270453594343676	-3.73824458354455	0.0001853096252511	0.0008575132517953
LmxM.08_29.2540	1407.10426072663	-0.651312017114455	0.133563291560248	-4.87642981470443	1.08023098217613e-06	9.03635744296476e-06
LmxM.15.0281	423.256887215021	-1.02323350383373	0.155319635141526	-6.58792111442556	4.460275016935959e-11	9.67726687711462e-10
LmxM.14.1480	1402.19379324907	-1.08611171834814	0.143477188571711	-7.56992612665591	3.73436528266535e-14	1.46926725929938e-12
LmxM.14.0640	2762.80384907828	-0.891343978264337	0.213659912658722	-4.17178855487073	3.02218022058996e-05	0.0001718629872331
LmxM.13.1480	2840.63337652448	-0.633830849601891	0.146442757142017	-4.32818161834536	1.50345470862638e-05	9.30241389694113e-05
LmxM.36.0540	1684.69218324901	-0.774145350037837	0.151080116128523	-5.12407171688482	2.99007166306843e-07	2.90287594869087e-06
LmxM.23.0950	1114.44565869583	-0.930763662116409	0.147092587035075	-6.32774010490727	2.48777686075185e-10	4.55612229976892e-09
LmxM.36.3840	1777.18801036258	-0.851000149511014	0.201694674042781	-4.21924948464683	2.45116915119294e-05	0.0001428487875992
LmxM.36.4350	344.075970621105	-0.759480920107759	0.311616933403235	-2.43722608978051	0.0148004223555192	0.0358057878874476
LmxM.27.0160	1191.04129385868	-0.701511974153757	0.155347310864664	-4.51576516033098	6.30885492698668e-06	4.33036010556022e-05
LmxM.34.4930	882.72521822235	-0.605400549517751	0.142826621522303	-4.23870944411589	2.24808390061305e-05	0.0001320428136767
LmxM.16.0960	865.120248451229	-0.648380748709475	0.116475055318338	-5.56669191473992	2.59620818980636e-08	3.12114326678037e-07
LmxM.10.0470	3373.07808214588	-0.699134276895875	0.265232629170851	-2.63592861512345	0.0083907381354802	0.022071989663485
LmxM.31.3140	1234.83821360373	-0.764975358917433	0.0699042725456805	-10.9431846017358	7.16384486211403e-28	1.96360987670546e-25
LmxM.31.1300	665.77012706498	-0.814936588273241	0.121177174210886	-6.72516580437004	1.75392606189878e-11	4.19259709505629e-10
LmxM.15.0270	1054.96415606228	-0.755076811566015	0.124738583364234	-6.05327390452404	1.41931230818597e-09	2.25308978961645e-08
LmxM.26.2305	741.178765525231	-1.27171171751114	0.122177201526129	-10.4087481267049	2.26176259739894e-25	4.13299418631366e-23
LmxM.31.0210	1818.19478363786	-0.773624392940606	0.10643288646653	-7.26865932724552	3.63072749683964e-13	1.21859070230663e-11
LmxM.33.3100	223.779845808951	-1.03328816874574	0.347064575098077	-2.97722165523158	0.0029087363175584	0.0090531940724009
LmxM.16.1540	885.786803104534	-0.892828723334266	0.210550913782499	-4.24044098073385	2.23081086803701e-05	0.0001312157208002
LmxM.21.0710	1849.01479099776	-1.05611428545359	0.174075395848387	-6.06699344445797	1.30326874533359e-09	2.08891969782949e-08
LmxM.36.4170	3307.80183672806	-1.10654256194402	0.103607310411371	-10.6801591272905	1.26055397610698e-26	2.8793153737577e-24
LmxM.05.0580	1373.74547019821	-0.711879338875424	0.263101614717627	-2.70572014405706	0.006815645659183	0.0185518219978359
LmxM.34.1230	2341.52971144773	-1.02467145893584	0.14647851663216	-6.99537025971536	2.6455930579505797e-12	7.580038925270949e-11
LmxM.15.1390	1164.06266313316	-0.893512252117876	0.161501131696447	-5.53254483564422	3.15617729325671e-08	3.73118626420346e-07
LmxM.29.2550	339.270810897615	-0.86995122892482	0.246028405730654	-3.53597880838695	0.0004062672819898	0.0016880929054081
LmxM.08_29.1870	1170.37084164304	-0.670742742362548	0.123950153397143	-5.41139098241734	6.25370618486187e-08	6.89332787642348e-07
LmxM.11.1160	1005.64794452905	-0.713978450258355	0.258980368952622	-2.75688251254662	0.0058355314603102	0.0162994480971912
LmxM.31.2650	1201.62976806136	-1.19321553080912	0.185890930319916	-6.41890128128153	1.37261377916688e-10	2.68099836249151e-09
LmxM.36.5380	1303.20369496945	-0.765873384974473	0.108569486259332	-7.05422316492395	1.73567629246152e-12	5.133980630543539e-11
LmxM.17.1290	4992.32660641038	-1.07746854792405	0.168850896932325	-6.38118344349632	1.75724654297844e-10	3.33714510921749e-09
LmxM.24.1790	703.74051210841	-0.66469207706714	0.145047766390726	-4.5825736831866	4.59287791235423e-06	3.25019234709887e-05
LmxM.34.1410	3400.39156171226	-0.726007132769646	0.132352814292556	-5.48539248409829	4.12552413820966e-08	4.76463272310366e-07
LmxM.27.0870	2442.0245855513	-0.764070620623225	0.134459897709361	-5.68251674766842	1.32726911548936e-08	1.71067930041834e-07
LmxM.34.4270	703.769543299217	-1.229661318767	0.147367444795382	-8.34418565426284	7.17062678907202e-17	4.46697455201055e-15
LmxM.02.0110	910.377509080607	-0.614252744261701	0.145132563999248	-4.23235645630076	2.31255506999712e-05	0.0001354425950184
LmxM.27.0430	1624.58703879846	-1.00948760867013	0.159514598039896	-6.32849670860623	2.47561136721352e-10	4.5439625608475e-09
LmxM.05.0780	3462.94670448339	-0.932508126381479	0.119094005951581	-7.83001729541791	4.878028578390491e-15	2.1919141530112e-13
LmxM.25.2120	1050.58877598059	-0.755087167962336	0.0994438986023143	-7.59309699815775	3.12348547492755e-14	1.25904024805536e-12
LmxM.05.0050	979.654389132693	-0.946050597214579	0.135399692643839	-6.98709560370353	2.80635019283772e-12	8.01271445684188e-11
LmxM.34.1950	708.96502631228	-0.902195653368537	0.114737545363773	-7.86312493010151	3.74667005921211e-15	1.73083527510681e-13
LmxM.27.2200	1604.64565688913	-0.71412434947514	0.107370925069213	-6.6510030440252	2.91102261400433e-11	6.64926082082156e-10
LmxM.08_29.1720	2331.6281962689	-1.30252990253376	0.254269230098776	-5.12264068297907	3.0128614904989e-07	2.91733920188422e-06
LmxM.29.3310	1649.20682063606	-0.813507461779713	0.201065757433478	-4.04597715774085	5.210531399348e-05	0.0002769631525328
LmxM.36.1600	1866.14743717491	-0.639203569322254	0.1247842817363	-5.12246863489625	3.01561269804401e-07	2.91733920188422e-06
LmxM.27.2090	1312.15836299359	-1.01544086937857	0.0969353609861196	-10.4754432133798	1.12011673397733e-25	2.14202788453385e-23
LmxM.32.0570	1034.4749490136	-0.600240645206566	0.107015497874376	-5.60891326143415	2.0360102727038e-08	2.49509872912717e-07
LmxM.34.0180	786.42437350865	-0.718744841080232	0.19755608701787	-3.63818119669084	0.0002745702311043	0.0012106118018076
LmxM.10.0945	1471.93264258934	-0.667182782176801	0.121643364140245	-5.48474458012848	4.14067244421239e-08	4.77542068846543e-07
LmxM.31.2180	2542.02735753166	-0.79656498182162	0.133596132782549	-5.96248532970762	2.48429962215425e-09	3.76213550515182e-08
LmxM.27.1330	997.759100442932	-0.705254012177556	0.0898794941419856	-7.84666201017379	4.27256700196414e-15	1.9627552210699e-13
LmxM.34.5290	1923.60356586168	-0.767678947153633	0.18146819228674	-4.23037744234875	2.3329952476683e-05	0.000136542490545
LmxM.24.0940	1321.90808663256	-1.27868705268958	0.18740938558693	-6.82296166056451	8.918246354877119e-12	2.29171061800483e-10
LmxM.34.4850	1514.18856672301	-0.859490684806404	0.0795612230779716	-10.8028842639094	3.33557881065951e-27	7.836704160015181e-25
LmxM.14.1040	753.557551720959	-0.702873710278355	0.12153007339344	-5.78353728136805	7.314596776412631e-09	1.00919344450404e-07
LmxM.16.1610	2159.55919752507	-0.875825831227779	0.147418849278018	-5.94107087063238	2.83166153261035e-09	4.24904247858666e-08
LmxM.33.0380	1513.54861442955	-1.29739371287822	0.146504892615203	-8.85563403186703	8.3209466567697e-19	7.4372982998497e-17
LmxM.14.0970	655.528208270183	-0.602749146937301	0.118419283982256	-5.08995770509486	3.5814338794753e-07	3.42045653785429e-06
LmxM.31.3270	2245.75272152322	-1.25317396232864	0.170330820820829	-7.35729421304705	1.87675406855844e-13	6.53921555328646e-12
LmxM.10.1030	1811.85715843482	-0.698537339148051	0.100826416817461	-6.92811825707051	4.26475184762556e-12	1.16896848143416e-10
LmxM.36.5360	1295.89588628204	-0.744252589882752	0.109842680551065	-6.7756229741385	1.23871326417067e-11	3.06805396725164e-10
LmxM.24:ncRNA:rfamscan:433345-433509	697.769174232485	-0.685027356873746	0.264319589896794	-2.59166321021163	0.0095513224457771	0.0246208540663402
LmxM.05.1090	375.074143763454	-1.3605270195869	0.485006198447279	-2.80517449868177	0.0050289346103404	0.0144287959877283
LmxM.24.0850	1869.33183119552	-0.705760567559521	0.0769336586621061	-9.17362543044044	4.5737218844136e-20	5.01462867407107e-18
LmxM.36.6910	4113.11957981782	-0.852373185908695	0.106896495765655	-7.97381784878451	1.5384623918346802e-15	7.575315118596741e-14
LmxM.36.0440	698.549184539802	-0.874965339735969	0.203207475046554	-4.30577339507574	1.66403332872736e-05	0.0001018106105812
LmxM.26.1040	2286.208909324	-0.971002903625426	0.084218229869839	-11.5296047557177	9.357230867409651e-31	3.84722547113548e-28
LmxM.16.0530	1716.06537363674	-0.60554846383572	0.0965866408389356	-6.26948466761062	3.62244960449221e-10	6.461475726190771e-09
LmxM.08.0890	565.081875217498	-1.03356773972698	0.236896552304477	-4.36294969121612	1.28320460128967e-05	8.16070490054523e-05
LmxM.09.0990	2480.05504494906	-0.625758408241542	0.0973032567807923	-6.43101196141122	1.26757184451493e-10	2.49359887020247e-09
LmxM.28.0330	1135.63822856409	-0.871841485548346	0.109936316094412	-7.9304229623232	2.18400757789087e-15	1.05641731252922e-13
LmxM.30.3070	1490.0671138406	-1.21628688659161	0.485328761546982	-2.5061092252491	0.0122067905078258	0.0303802779497129
LmxM.30.3130	1643.28337862221	-0.84250622875628	0.122998225548814	-6.84974295358365	7.39828021599774e-12	1.94987366077402e-10
LmxM.26.2580	544.466089846108	-0.634928114554462	0.15224982842703	-4.17030430256785	3.04193178320438e-05	0.0001728666555168
LmxM.04.0770	875.15920723383	-0.777857159184657	0.10313687168343	-7.5419890722711	4.62856543798845e-14	1.79531573568769e-12
LmxM.18.0330	941.239108435547	-0.724377325685859	0.127589060303143	-5.67742503914354	1.36737415193363e-08	1.75686213302347e-07
LmxM.13.0270	1280.52185952517	-0.625335028811761	0.173952596311824	-3.5948588412604	0.0003245675075788	0.0013915112694583
LmxM.36.3290	851.756443246322	-1.10456999457582	0.123699629305835	-8.92945274593249	4.28121336101372e-19	4.00050198495634e-17
LmxM.29.2490	128.125115608649	-1.68966372688291	0.46303495858201	-3.64910617560562	0.0002631543309816	0.0011677917235089
LmxM.30.1070	3656.58697398199	-0.846071587873679	0.10552975920448	-8.01737438094865	1.08029472436673e-15	5.65812962959721e-14
LmxM.05.0450	4176.15912566724	-0.840696526078496	0.18512334262768	-4.54127779968465	5.59142966327707e-06	3.87348998493069e-05
LmxM.34.1160	1277.89144754057	-0.851836402847275	0.116051084983824	-7.34018473817813	2.13299233038276e-13	7.400673389340669e-12
LmxM.33.2250	917.685377910714	-0.675351060941399	0.136964274730639	-4.93085559916684	8.18702377179846e-07	7.08651541847355e-06
LmxM.08.0410	920.869646080876	-0.809915486036381	0.281258822016518	-2.87960918071688	0.0039816840655504	0.0118716801096583
LmxM.01.0030	1252.23223350348	-0.64194605871895	0.151951847421893	-4.22466767999598	2.39293625884709e-05	0.0001398515625906
LmxM.21.1568	629.46811338601	-0.638481188519615	0.168959969625879	-3.77889028941812	0.0001575288041054	0.0007423262786011
LmxM.34.3830	655.982496778335	-0.648084117991507	0.108833375382333	-5.95482879874653	2.60344218290398e-09	3.92089836447243e-08
LmxM.36.0570	1693.19731999168	-1.48873179905834	0.131323129640776	-11.3364020727395	8.66334665589318e-30	3.2381227068822596e-27
LmxM.31.0240	654.178678183599	-0.607183528754948	0.147056613189114	-4.12891005434835	3.64486943143396e-05	0.0002018432987124
LmxM.04.1050	1695.18936139045	-0.776757568699346	0.109229583972293	-7.11123800394932	1.1500661295980999e-12	3.55526082093427e-11
LmxM.10.0290	5090.27930981633	-0.913860085005707	0.0907285417870918	-10.0724652574073	7.312187062258941e-24	1.17898263162657e-21
LmxM.33.0080	1485.90257257915	-0.608571635941532	0.142544347576315	-4.26934947817356	1.96043895388658e-05	0.0001173267068253
LmxM.32.1680	712.762686999016	-1.15294024606125	0.305559852359668	-3.77320592727655	0.0001611631568714	0.000756418172919
LmxM.18.0150	627.355678194308	-1.69829333544228	0.22140213896736	-7.67062749873724	1.71156938387239e-14	7.072479921398319e-13
LmxM.02.0090	1450.59864832939	-0.890071751846037	0.146201970187791	-6.08796003708277	1.1435840560297301e-09	1.85112041195522e-08
LmxM.21.0740	5704.21089840777	-1.04243215365864	0.241949496805599	-4.30847002131282	1.64387752696763e-05	0.0001008024228505
LmxM.28.0825	1652.86710621059	-1.25191949368121	0.199532106400383	-6.27427593616988	3.5126507389597103e-10	6.306665289621331e-09
LmxM.30.0080	3616.90336185284	-1.36863843970408	0.107174541563083	-12.7701823562128	2.40590145950729e-37	1.97837277015285e-34
LmxM.08.1110	2708.84508827585	-1.17347607463091	0.141382525796761	-8.30000785470327	1.04104511826652e-16	6.1586431708673104e-15
LmxM.22.1640	3429.38269969289	-0.740811207078065	0.154683716637717	-4.78919968553063	1.67447790502956e-06	1.32550318955237e-05
LmxM.27.1970	1649.5036645878	-0.784478918836065	0.184645158060837	-4.24857563054859	2.15134017264312e-05	0.000127359918587
LmxM.26.0460	3495.42200290743	-1.14340507126137	0.131676813345684	-8.68341997508437	3.8404315184477496e-18	3.00760651201865e-16
LmxM.08_29.0320	6565.76954631782	-0.648423600333713	0.0878462668901819	-7.38134497103126	1.5669840460698499e-13	5.53017588447742e-12
LmxM.08_29.2340	1310.2693870539	-1.06528620155774	0.227122073753136	-4.690368417099	2.72713561673543e-06	2.03311298063604e-05
LmxM.26.0620	1538.33161741778	-1.15113448082868	0.119396984088585	-9.6412358286589	5.35394797843669e-22	7.4619515638449e-20
LmxM.22.1610	683.395319539341	-0.814969355289041	0.166185693810616	-4.90396818523845	9.39197078293837e-07	8.00312702052873e-06
LmxM.36.0180	12635.9983753504	-1.03887028429287	0.143106092397532	-7.25944134794071	3.88692286790214e-13	1.29927507084387e-11
LmxM.26.0010	90.9683944755347	-0.939066313854827	0.286889373295719	-3.2732697731779	0.0010631095771852	0.0038493835549072
LmxM.27.0240	431.78796726805	-0.729797935257217	0.194800828074754	-3.74638004607023	0.0001794047303298	0.0008320615327142
LmxM.36.2150	883.106515600998	-0.741311910573914	0.14003310027834	-5.29383345152276	1.19778528378555e-07	1.24675802386944e-06
LmxM.21.0370	1086.64927964348	-0.632832155206615	0.137146098874513	-4.6142920608019	3.94437447070154e-06	2.84015685399113e-05
LmxM.27.1830	695.398965596834	-1.0164853335315	0.124993648490869	-8.13229588706464	4.2123509453933497e-16	2.27882643578747e-14
LmxM.34.0670	2177.22218271108	-0.619789606449378	0.131405994682429	-4.71660069958936	2.39817696645374e-06	1.82933294945725e-05
LmxM.21.1830	2091.56036703987	-0.655475501282205	0.0599738593891453	-10.9293533542522	8.34408971719557e-28	2.21333708853223e-25
LmxM.18.1370	1868.43400689418	-2.05841992452649	0.558461003162648	-3.68587943091702	0.0002279142397342	0.0010291811056202
LmxM.22.0620	1607.23512225108	-0.610848445140148	0.133106514914606	-4.5891701509279	4.45011586836911e-06	3.16277465735516e-05
LmxM.33.2610	2903.3984789929	-0.776026564300248	0.110783748133266	-7.00487731618121	2.4720235196602198e-12	7.1324383867249e-11
LmxM.16.1600	1044.82916224089	-0.671436431734905	0.1646634251577	-4.07762944984208	4.54971998978424e-05	0.0002461338649736
LmxM.34.3700	3105.86457922362	-0.698960939629143	0.26114806920417	-2.6764928485176	0.0074397153490365	0.0199987529827132
LmxM.13.1060	1354.44706840793	-0.703550811885976	0.103127708248492	-6.82213174165309	8.969934685666689e-12	2.2978122405058301e-10
LmxM.05.1200	1616.05379348666	-1.2232388355036	0.231922058152294	-5.27435313936524	1.33225153912277e-07	1.37454258547134e-06
LmxM.04.0940	1365.44043431819	-0.659324357098006	0.120136264913905	-5.48813763746115	4.06193516633174e-08	4.70440744686561e-07
LmxM.21.1555	5042.94009718733	-1.51882687995002	0.144217659335547	-10.5314902970115	6.18474561094785e-26	1.2404186136298601e-23
LmxM.36.3070	2116.34942683538	-1.29605336303926	0.177525403564088	-7.30066422618428	2.86350540951195e-13	9.7300020588499e-12
LmxM.31.0690	592.841177742134	-0.654927076715716	0.161562014840637	-4.05371941765971	5.04096736729347e-05	0.000269514899999
LmxM.31.1500	996.835574113054	-0.723064384134438	0.106645429726161	-6.78007848991831	1.20110610640422e-11	3.00203511032277e-10
LmxM.33.4010	3047.40250799695	-0.897054636383145	0.189897208981372	-4.72389584446785	2.31368946927907e-06	1.7731098327942e-05
LmxM.27.2320	1169.87437251948	-0.696930690667122	0.0977443167047976	-7.13014029011995	1.0026667875031998e-12	3.1469194632209194e-11
LmxM.36.3590	1738.06177429291	-0.693064926264538	0.155097842208063	-4.4685658833009	7.87457596722984e-06	5.26016557096109e-05
LmxM.18.0230	659.205234891053	-0.716645001023983	0.103875753539335	-6.89905946870086	5.23479558160783e-12	1.40758861263959e-10
LmxM.22.0260	1550.06169166012	-1.0720250958398	0.167445568474764	-6.40223032239497	1.53123436536443e-10	2.9626682791509904e-09
LmxM.25.1810	563.561239183506	-0.884278972838783	0.103427566255928	-8.54974166800621	1.23364310241269e-17	8.89846248345571e-16
LmxM.05.0830	5907.03467467132	-0.697824778971107	0.136410802179734	-5.11561231090526	3.12724801068942e-07	3.0146964117115e-06
LmxM.06.0860	1762.64242956786	-1.31529683521081	0.221567798474656	-5.9363176610759	2.9149476633430604e-09	4.35020229322504e-08
LmxM.23.1510	2009.68250516325	-0.726453677609089	0.112591519771665	-6.45211716728165	1.1029824738173601e-10	2.1907789570531803e-09
LmxM.28.0930	1874.21750091601	-1.04241308828239	0.10658337444228	-9.78025976130918	1.36858841425906e-22	1.97436886499163e-20
LmxM.13.0870	3900.61014480399	-0.888027049286869	0.117496088099943	-7.55792863956042	4.0953860744046504e-14	1.59603600425732e-12
LmxM.26.0640	1100.69165772086	-1.88548117008999	0.158573979287263	-11.8902305319233	1.33038867444618e-32	6.837366293731849e-30
LmxM.34.3010	272.35245499891	-0.74105081779218	0.270445429290131	-2.74011219097805	0.0061418215426181	0.0169876214412879
LmxM.19:ncRNA:rfamscan:173533-173698	1476.75066119944	-0.730699038467774	0.235506106998455	-3.10267554324002	0.0019177977113095	0.0063728116322065
LmxM.36.1430	5773.5951529538	-1.06668113268722	0.191148653132637	-5.58037482977737	2.40000814836196e-08	2.90651944093967e-07
LmxM.22.0580	565.358020421732	-0.786995939899084	0.169847050356058	-4.63355671028298	3.59436235853362e-06	2.60868858554475e-05
LmxM.36.5845	642.746645578403	-1.28643286995885	0.29277092232467	-4.3939912466179	1.11288298689579e-05	7.18871704732452e-05
LmxM.27.0380	4513.68563339702	-0.823878014770202	0.127340804370213	-6.46986658239549	9.808948623765829e-11	1.96729230568845e-09
LmxM.29.2820	1780.99217903662	-1.10561493380802	0.102165003575099	-10.8218557736878	2.71229037219124e-27	6.70117056039513e-25
LmxM.36.6530	539.904917531981	-0.609422896416511	0.132245124867939	-4.60828251343924	4.0600875771462e-06	2.92091864802041e-05
LmxM.31.2951	1979.27727162376	-0.760924565004718	0.117167510877745	-6.49433071765671	8.3403351492439e-11	1.7060342271699601e-09
LmxM.11.1030	2037.13406583279	-1.10136562419201	0.114914903234987	-9.58418441113645	9.319099174535719e-22	1.27718254187012e-19
LmxM.29.0970	1588.17319431661	-0.737126843159544	0.0796878173533977	-9.25018236966574	2.24109965537711e-20	2.5955721783332297e-18
LmxM.14.0800	1691.10331977202	-0.679724326998416	0.0985254498826308	-6.89897207075068	5.238016727079099e-12	1.40758861263959e-10
LmxM.03.0600	2006.13404569945	-1.10107894673881	0.161634271330794	-6.81216265383092	9.614231291565229e-12	2.44761064738517e-10
LmxM.30.2580	1985.42437860072	-0.794441927859034	0.188397947726485	-4.2168289912181	2.47761719297e-05	0.0001441857478966
LmxM.18.0350	1157.27118683769	-0.79344399375762	0.105330939207232	-7.53286735815171	4.96380290149211e-14	1.8984814539055598e-12
LmxM.25.0920	582.539876132073	-0.898994571966908	0.229994384809459	-3.90876748017866	9.27681972140159e-05	0.0004654257996893
LmxM.28.1160	902.341827226651	-0.686706577111292	0.106360903733378	-6.45638155569555	1.07236038064589e-10	2.14029597331339e-09
LmxM.36.2610	1113.53972521722	-0.709263179536091	0.147665497330312	-4.80317469117072	1.56169521158592e-06	1.2479902550895e-05
LmxM.07.0570	1928.76045197933	-0.741319355833312	0.123803083694668	-5.98789088050185	2.12579598763224e-09	3.26127246386192e-08
LmxM.20:ncRNA:rfamscan:686074-686186	288.661882553095	-1.00893522434611	0.299791828534862	-3.36545271856462	0.0007641816286044	0.0028904625262254
LmxM.27.1310	7534.95832881131	-0.611473838527614	0.0763760013223566	-8.00609914031497	1.1840428402474202e-15	6.12351212286449e-14
LmxM.27.2032	126.124556282187	-0.745211622805262	0.310938435405472	-2.39665328550807	0.0165455713725701	0.039129776645569
LmxM.25.1180	159.795247254307	-1.89662565222032	0.378569150920435	-5.00998469529003	5.44343642255395e-07	4.95696320073767e-06
LmxM.08.1222	3018.7547181129	-0.892068058098504	0.120892124697355	-7.37904193785769	1.59432610085336e-13	5.602625439024429e-12
LmxM.24.2060	3426.41020308604	-0.707943440719026	0.19733233311179	-3.587569404138	0.0003337749043588	0.0014228258364658
LmxM.33.4290	2669.01212996382	-1.13871134934071	0.172319508314847	-6.60813949898324	3.89179886156096e-11	8.54262398069179e-10
LmxM.22.1540	3434.36590649759	-0.784500665394809	0.0895780019992802	-8.7577379254464	1.9920767095324002e-18	1.67151497780458e-16
LmxM.18:ncRNA:rfamscan:569325-569396	462.123665867749	-1.27576621115644	0.21190404543485	-6.02049011635633	1.7388972458290501e-09	2.70301551086054e-08
LmxM.08_29.0840	1090.80257071795	-1.04687707033329	0.141825754814412	-7.38143133243464	1.5659677599469997e-13	5.53017588447742e-12
LmxM.21.0340	5642.01932439652	-0.637099575251519	0.119081545676931	-5.35011173754812	8.78999427990579e-08	9.37485382148707e-07
LmxM.19.1280	1039.27777632045	-0.676470814233518	0.163894425743535	-4.12747908395658	3.66761779224199e-05	0.000202544130998
LmxM.29.2760	2731.01397986382	-0.716006915921354	0.21533719515842	-3.32504988464533	0.0008840271626989	0.0032803950175423
LmxM.36.0250	3810.69662834589	-0.790772909317009	0.1331217697786	-5.94022232901632	2.8463578706849104e-09	4.26331525876904e-08
LmxM.28.2260	669.6243500848	-0.633729467347864	0.251736658453233	-2.51743020361732	0.0118214388843783	0.0296094096698881
LmxM.18.0530	338.505082592603	-0.965116301230892	0.285092013684149	-3.38528003208162	0.000711056739976	0.0027170165301222
LmxM.26.2480	659.58686931184	-0.888283930387095	0.162746205442696	-5.45809303492402	4.81275478492732e-08	5.45114085350652e-07
LmxM.08.1230	1518.90529995215	-0.608251311631303	0.0920201273105455	-6.60998120094534	3.8436883123747094e-11	8.473632437709711e-10
LmxM.05.0140	2426.05257282488	-1.11896059966562	0.0930253969277647	-12.0285495855987	2.51540849797339e-33	1.4774431484882299e-30
LmxM.10.0850	2117.32171526931	-0.624879400499715	0.123417257169046	-5.06314444862286	4.1239713813237e-07	3.8800247904605e-06
LmxM.34.4430	2417.92364424689	-1.3352247995004	0.262992316079361	-5.07704871155811	3.83342619339306e-07	3.63998424806826e-06
LmxM.31.0985	311.047503646209	-0.921839010762757	0.25959459825569	-3.55107162073837	0.0003836659969569	0.0016055396910823
LmxM.17.1250	1344.54406240001	-0.635374320448907	0.116017140701666	-5.47655559002917	4.33684573957281e-08	4.9807098486742e-07
LmxM.09.1050	911.420601964971	-0.641806621386778	0.119733029927966	-5.36031387306327	8.30774826363537e-08	8.9183569153882e-07
LmxM.11.0210	1482.54276982784	-0.973880501782669	0.115211517658111	-8.45297867416912	2.83963559320943e-17	1.91396094122632e-15
LmxM.30.1190	1660.07717423873	-1.00691086173658	0.204563006152255	-4.92225295607528	8.55535294158246e-07	7.3665620145165e-06
LmxM.33.3890	568.673099302623	-0.954648326700778	0.203072834159729	-4.7010144446494	2.58872200031361e-06	1.94402383639989e-05
LmxM.34.1460	698.180320394638	-0.917417675749697	0.322364133544675	-2.84590492640074	0.004428541476736	0.0129593937947333
LmxM.19.1380	2945.3591502054	-0.725443783549162	0.117481493088616	-6.1749622385371	6.61792860751357e-10	1.13373389457467e-08
LmxM.33.0490	1888.96230091049	-0.606133440626258	0.14003779154005	-4.32835618128773	1.50226380972752e-05	9.30204465917875e-05
LmxM.32.3250	965.048049891286	-0.741292515836986	0.146990485745263	-5.04313263595616	4.57971563812518e-07	4.26489260388487e-06
LmxM.08_29.2450	176.359277167453	-0.954772721568928	0.331416792920578	-2.88088214587766	0.00396563892828	0.0118364605833928
LmxM.36.4970	347.638067383304	-0.773879303387465	0.16117186180648	-4.80157823278523	1.57419984656297e-06	1.25676168332886e-05
LmxM.09.0910	190.165719923011	-0.733448498984218	0.209271108313246	-3.50477667412342	0.0004569904517606	0.0018667821583845
LmxM.36.2030	3247.59499449143	-1.98903009333759	0.451755021407805	-4.40289537267162	1.06815686494071e-05	6.9324813736444e-05
LmxM.24.1840	731.654907331421	-1.04215842299273	0.210254094666994	-4.95666172229999	7.17146771959445e-07	6.28018946306977e-06
LmxM.13.1660	5040.30001022575	-1.10388668305982	0.146896327111612	-7.51473304176682	5.7027180682612e-14	2.14684359830232e-12
LmxM.18.0090	3268.1880702118	-0.792666262282131	0.124263421484408	-6.37891869395847	1.78342682195319e-10	3.3712916682577203e-09
LmxM.16.0590	4409.28051224072	-0.894879119967905	0.202635176901645	-4.41620815127406	1.00447363191355e-05	6.55018768852112e-05
LmxM.30.2970	5896.08430973317	-0.641325820142112	0.226167920092659	-2.83561797747163	0.004573711885171	0.0133272972472577
LmxM.34.1790	452.005927161286	-0.619015940489191	0.185123696744909	-3.34379634467955	0.0008264037898344	0.0030902766547561
LmxM.25.1770	2622.89716709345	-0.933102157644194	0.258157227337049	-3.61447234024534	0.0003009599428571	0.0013071524476361
LmxM.32.2800	2245.96304647613	-0.892145478384114	0.121945619110601	-7.31592889429644	2.55606993570932e-13	8.75773461722407e-12
LmxM.25.2450	18015.2984103956	-0.917202599740913	0.313671111659701	-2.92409012384914	0.0034546470937649	0.0105018717382734
LmxM.17.0430	902.229774443949	-0.78684934290471	0.226456726603895	-3.4746123672494	0.0005115920447608	0.0020549446477017
LmxM.08_29.0850	1412.91862681105	-1.26370304485602	0.195315115282717	-6.47007295378454	9.795561243809369e-11	1.96729230568845e-09
LmxM.29.3390	966.701623145294	-0.908313597555727	0.298989300099769	-3.03794683372493	0.0023819597529873	0.0076511152534434
LmxM.32.1280	764.93265417154	-0.643580364956505	0.188799334028158	-3.40880633011407	0.0006524778348092	0.002523671324382
LmxM.21.0810	1548.07256267741	-0.960148621789076	0.223423253199214	-4.29744267009201	1.72779928070575e-05	0.0001052421739647
LmxM.29.0620	1245.6135153756	-0.889291982024442	0.132366590551673	-6.71840211580643	1.83728096812473e-11	4.3538793662506103e-10
LmxM.34.3440	692.502217157783	-0.874248953323053	0.128850420535808	-6.78499107482613	1.16093688173486e-11	2.9104829202761503e-10
LmxM.29.2900	2102.25349454434	-1.08466219757851	0.12694582197537	-8.54429220828521	1.29326432412021e-17	9.16768322175906e-16
LmxM.07.0340	3502.52837015832	-1.0481284954769	0.155900623093464	-6.72305520452302	1.7795312254796897e-11	4.24147399046941e-10
LmxM.28.1820	1648.39467643753	-0.877372663556972	0.127927583162874	-6.85835409272077	6.9658426976885695e-12	1.84774595171268e-10
LmxM.34.3230	5312.52738430219	-1.36874727469208	0.222605753833434	-6.14875065500893	7.80956362679807e-10	1.3132523865677e-08
LmxM.29.0120	1544.48637941522	-0.921410796675065	0.198126481174528	-4.65061909550295	3.30940066876345e-06	2.41485394731485e-05
LmxM.08_29.1620	1334.52129558706	-0.63414554142018	0.0956429459787025	-6.63034304235452	3.3490762446559295e-11	7.46326665577392e-10
LmxM.18.1620	585.141122052942	-0.705789258256926	0.12757306027817	-5.53243182156147	3.15821216544889e-08	3.73118626420346e-07
LmxM.33.0110	211.583534687634	-1.64148067512242	0.418262522735756	-3.92452248503137	8.69019427092192e-05	0.0004405639179395
LmxM.32.1860	705.553106362956	-0.673733426559912	0.283389683727256	-2.37740985380518	0.0174347039413908	0.040940288913745
LmxM.19.1365	334.280960251352	-1.1553586350802	0.194015180021618	-5.95499091850168	2.6008627261343104e-09	3.92089836447243e-08
LmxM.15.1450	1812.99939495511	-1.10706887560439	0.20983889352806	-5.27580400845161	1.32175293384577e-07	1.36542391645902e-06
LmxM.24.0330	1228.08912951585	-1.14752607003685	0.102679158231457	-11.1758422040247	5.354006623460799e-29	1.91417375933557e-26
LmxM.04.1160	1061.81060860609	-0.666156446652281	0.196602694916117	-3.38833832840647	0.0007031746917325	0.0026944107596069
LmxM.18.1300	571.903044049124	-0.734886550810454	0.212673865623252	-3.45546242203681	0.0005493497617457	0.002182475172235
LmxM.20.0220	361.382443730587	-0.914892356495178	0.334381088394386	-2.73607685437075	0.0062176502728176	0.0171857943507159
LmxM.19.1315	493.963794171607	-1.33410114798342	0.130471394346053	-10.2252386791004	1.52850952383139e-24	2.67424123712032e-22
LmxM.20.0940	817.657459961345	-0.685563763905315	0.110110108430751	-6.22616555079019	4.77988992352063e-10	8.32733789006571e-09
LmxM.32.2540	3545.52356644363	-0.763943885774945	0.104378532950686	-7.3189751204481	2.49871913934071e-13	8.59705752418355e-12
LmxM.17.0840	556.955610404349	-0.638944325154109	0.107914601847709	-5.92083290133246	3.2031519294835404e-09	4.71189951988249e-08
LmxM.05.1170	1726.01454743263	-0.731767930816844	0.102046558131793	-7.17092221642364	7.44942231082316e-13	2.3835252786731097e-11
LmxM.28.1440	1067.78956680019	-0.793179899753519	0.141667185789326	-5.59889642286719	2.15720629943594e-08	2.62795665189063e-07
LmxM.36.5330	340.209367864822	-0.693770824524841	0.20806200935698	-3.33444258598172	0.0008547054307951	0.0031859667984717
LmxM.36.3280	1469.05285352906	-0.766784891268907	0.181861303137291	-4.21631692966615	2.48324702770719e-05	0.0001444111761586
LmxM.34.5040	8203.34441757215	-1.55332569390879	0.169654771104146	-9.15580318666814	5.3954928862432e-20	5.837781316260239e-18
LmxM.36.1900	1143.96962710129	-0.678444310954408	0.157261864813415	-4.31410572270242	1.60250250192201e-05	9.85592974817103e-05
LmxM.28.2420	2017.08476497619	-1.28554294296068	0.22242269744884	-5.77972912704367	7.482099140802871e-09	1.02542168724703e-07
LmxM.27.1220	1375.78181665214	-0.84696388874129	0.226001751734288	-3.74759877851332	0.0001785355361764	0.0008289653946802
LmxM.36.6100	376.282897078654	-0.739530627172825	0.26407841036611	-2.80042062562996	0.005103605697152	0.0146073615202511
LmxM.27.0220	617.983922844201	-0.635800277117145	0.172794112697775	-3.67952511338849	0.0002336686787276	0.0010534306716983
LmxM.28.2160	619.105037828636	-0.709415049658285	0.157181176893944	-4.51335881100416	6.38089335630262e-06	4.37615396737919e-05
LmxM.29.0205	647.495429378472	-1.10123661204561	0.151439882845495	-7.27177406211502	3.54796670185344e-13	1.19569386021889e-11
LmxM.29.1370	157.044481150163	-1.54034793380391	0.604202687993696	-2.54938940923742	0.0107911730594798	0.0273174264093403
LmxM.28.1240	1841.87853894223	-0.65858374559126	0.0846392461327728	-7.78106818860538	7.1914717693622e-15	3.1623247251051e-13
LmxM.32.0312	22.7048658083881	-1.37740694920479	0.496797942073149	-2.77256975634166	0.00556155981053	0.0156565239034537
LmxM.34.1650	965.225660707613	-0.639089533461928	0.149631950768779	-4.27107666630298	1.94531513151894e-05	0.0001165743029816
LmxM.18.0020	963.942668847302	-1.59892811565041	0.115718533408108	-13.8173900805623	2.00197554578296e-43	2.74370748549555e-40
LmxM.11.1100	951.139478244582	-0.954737054792749	0.278137449811437	-3.43260878907177	0.0005978039967728	0.0023374903782514
LmxM.22.0170	987.072242479866	-0.728905460506468	0.191772936288206	-3.80087761398738	0.000144184508021	0.0006869266145788
LmxM.23.0830	2304.18745382842	-0.98774705320312	0.154412043145854	-6.3968265238879	1.58639382758066e-10	3.0407730639151104e-09
LmxM.29.2130	940.876198856264	-0.608370384479497	0.21938070490769	-2.77312621789361	0.0055520581760616	0.0156351282129298
LmxM.36.5350	793.329254976349	-0.73842245684612	0.22693487286588	-3.25389591965679	0.0011383397780171	0.0040665817904611
LmxM.13.1600	1069.43479415732	-0.629161981197143	0.159296022992422	-3.94964023192892	7.82687455857074e-05	0.0004016150094149
LmxM.27.0650	4525.02211220059	-1.38188230647606	0.135676763216916	-10.1851066734747	2.31106285882246e-24	3.95913956002023e-22
LmxM.25.0080	2135.2930719739	-0.672769315209002	0.116565047557166	-5.77162133339378	7.85123941112688e-09	1.07065906596511e-07
LmxM.28.1020	754.351645712967	-0.672409104295421	0.0983055919087602	-6.83998835915153	7.91996159455427e-12	2.07239650131044e-10
LmxM.08_29.0030	1980.00335746582	-0.69749543696747	0.145742502209832	-4.78580665483056	1.70301942738817e-06	1.34653161071278e-05
LmxM.34.0140	3264.20801436541	-0.757835291147044	0.196178449493139	-3.86298950320508	0.0001120078225186	0.0005535098104394
LmxM.32.1590	1659.13300141664	-1.21802043711269	0.0708638886466225	-17.1881681964506	3.25660054607683e-66	2.67790262903898e-62
LmxM.36.2220	220.930484350974	-0.760668477605461	0.278944889503277	-2.72694896457863	0.0063922925075299	0.0175681220887096
LmxM.15.1470	4068.95827774402	-0.905194948737699	0.165496562670254	-5.46956948309114	4.51130041365132e-08	5.15944691258064e-07
LmxM.36.6940	13761.2235916054	-1.01617817559448	0.164098114819592	-6.19250365375408	5.92159765787154e-10	1.02082384781295e-08
LmxM.27.2400	6305.43066145276	-1.20443865736298	0.168891238084976	-7.13144548538969	9.93202908334993e-13	3.12915996752439e-11
LmxM.09.0070	736.396530927306	-0.672210295227971	0.0898928127117307	-7.47790924490951	7.55143149490727e-14	2.80974756482455e-12
LmxM.27.1980	3562.66752648091	-0.764715505926467	0.097144805117364	-7.87191353158398	3.49257531805468e-15	1.6225676180996399e-13
LmxM.29.3190	1078.39233870927	-1.23292041081348	0.159450215288217	-7.73232202029261	1.0560240350192601e-14	4.52275293748094e-13
LmxM.19.1560	2006.6900328902	-0.826039781907345	0.134205978730343	-6.1550147744691	7.50704968066413e-10	1.26756610932446e-08
LmxM.10.0060	576.087829754631	-0.625527654412627	0.168087604821162	-3.72143832424862	0.0001980912507668	0.0009084798410794
LmxM.27.2210	280.65887835975	-0.90146555158174	0.341819537294568	-2.63725578331963	0.0083579783193237	0.0220351573324139
LmxM.32.1870	842.881085954364	-0.720834956510538	0.185435076134321	-3.88726324888176	0.0001013807884878	0.0005046333073459
LmxM.31.0380	446.378508885726	-0.645683977367878	0.220859812823806	-2.92350142433101	0.0034611864177215	0.0105178624955374
LmxM.27.2000	685.268081229772	-1.00535571013924	0.21157686530678	-4.75172797688209	2.01685588804743e-06	1.57200056563166e-05
LmxM.26.1570	4120.13326264643	-0.97019251180048	0.117103301932813	-8.28492874058428	1.18179823964153e-16	6.8921467550158005e-15
LmxM.36.3380	1539.05507006177	-0.697404744913451	0.151034728530359	-4.61751248669452	3.88367319613825e-06	2.80135479753025e-05
LmxM.12.0250	2832.161965505	-0.820884182447902	0.0973088579856382	-8.43586287457053	3.28768080783687e-17	2.14560311768592e-15
LmxM.21.0540	3992.17232667353	-1.00191797515898	0.130004644671654	-7.70678599745011	1.2902589238622901e-14	5.44092263124082e-13
LmxM.32.1575	370.773132186157	-0.766128785557733	0.164274291603249	-4.6637168730459	3.10548575209663e-06	2.28820872217657e-05
LmxM.12.0530	2591.82526675723	-0.664686226966942	0.1477144524581	-4.49980496766546	6.80158367883161e-06	4.62608954433684e-05
LmxM.08_29.0020	3253.59710921565	-1.13527090250509	0.130180010637145	-8.72077745998552	2.76298004736901e-18	2.24950345836786e-16
LmxM.30.3090	3799.60821266102	-0.716897194033623	0.087313878113004	-8.21057556401051	2.2013072032309599e-16	1.2483689056667701e-14
LmxM.21.1552	5153.01806891164	-1.16231566084734	0.150499002175353	-7.72307885133404	1.13552878268593e-14	4.83805864250072e-13
LmxM.36.2350	734.9295898375	-1.04792384812123	0.114782181228804	-9.12967358611453	6.870613503385981e-20	7.243212158761909e-18
LmxM.32.1630	3907.74838656567	-1.57799877919882	0.237857724592652	-6.63421287621099	3.26238719244176e-11	7.30970296551734e-10
LmxM.34:ncRNA:rfamscan:625529-625589	30.8853261015367	-1.46355991248817	0.436022156384653	-3.35661821551342	0.0007890198229166	0.0029680283640638
LmxM.20.0050	325.699479893337	-1.17713080067199	0.219483996136282	-5.36317372288539	8.17722914962863e-08	8.801224515366e-07
LmxM.30.3180	8138.61868570859	-0.757132513712407	0.30089767792407	-2.51624578473306	0.0118612433757699	0.0296810068158615
LmxM.13.0690	627.793770295327	-1.40195567908022	0.314450435578659	-4.45843134705892	8.25616311584411e-06	5.50165553497457e-05
LmxM.32.0470	502.562198900973	-0.745637792970864	0.189977300384673	-3.92487834841883	8.67735781626667e-05	0.0004404562550812
LmxM.36.3780	1335.03752539089	-0.890665003662819	0.102697874869613	-8.67267219300908	4.22095787584977e-18	3.27442798236912e-16
LmxM.21.0430	3942.29601361274	-0.832970664136216	0.105778201923048	-7.87469108940034	3.4158576473428702e-15	1.60506271052003e-13
LmxM.20.0260	2332.15404177349	-0.604425673820825	0.233269544957089	-2.59110409775958	0.0095668547922727	0.0246531641983261
LmxM.33.0960	462.524219299001	-0.72433555825955	0.187547464280005	-3.86214530300517	0.0001123956810015	0.000555092903829
LmxM.30.2290	1064.95234225852	-0.781768781004434	0.138030528107665	-5.66373824488049	1.48110286731927e-08	1.88823393456843e-07
LmxM.28.1110	995.669523998003	-0.610358834685261	0.189346956496228	-3.22349429840147	0.0012663681953061	0.0044673297597606
LmxM.25.0590	2437.63076816815	-0.858539024717738	0.139098750254871	-6.17215484067711	6.73654767793816e-10	1.15165554169824e-08
LmxM.33.0010	3645.02524311532	-1.40410470806264	0.222360708822964	-6.31453603244508	2.70973185214212e-10	4.92967367702759e-09
LmxM.29.3090	1547.67392765843	-1.90852512904453	0.43922102637368	-4.34524991847908	1.39117183156409e-05	8.69270970437046e-05
LmxM.33.2390	279.4636483888	-0.764262506033213	0.213246801945005	-3.58393419766413	0.0003384573866688	0.0014398008745877
LmxM.29.2350	671.061534903765	-0.942716348819833	0.159351090247023	-5.91597049859183	3.29924347834882e-09	4.82272549403908e-08
LmxM.20.0830	87.5168324179756	-0.932953800049724	0.31515418570552	-2.9603090879506	0.003073305345039	0.0094828479745802
LmxM.29.2740	4225.99389912488	-0.901804211947631	0.0946227742396518	-9.53051967873637	1.5649782740161301e-21	2.0454831357315102e-19
LmxM.25.1170	670.358206170424	-1.55223693497749	0.229374273351831	-6.76726693144243	1.3123781866005298e-11	3.23104366120245e-10
LmxM.36.6640	199.348247560498	-0.6498389914883	0.246468620728334	-2.63659929433603	0.0083741687641851	0.0220566270813242
LmxM.05.0010	961.462490024284	-0.703700934326454	0.152754090414895	-4.60675673178463	4.08998013267228e-06	2.93985197823113e-05
LmxM.34.2200	56.3978147454729	-1.75741263725973	0.619218707148526	-2.83811295907472	0.0045381119339569	0.013237635485253
LmxM.04.1120	1118.81389153016	-0.660605329776359	0.101112138944932	-6.53339289099737	6.42961809320216e-11	1.3453116941578e-09
LmxM.23.0050	1958.51672928792	-1.17088974829488	0.237365477997128	-4.93285610938358	8.10358531129228e-07	7.02909092982663e-06
LmxM.27.1910	1234.20239658006	-1.06057880103233	0.146153532640988	-7.2566073625982	3.9691970495872297e-13	1.32140515541522e-11
LmxM.04.1170	133.974481558372	-1.51267227030056	0.644791584350997	-2.34598637298145	0.0189768012652157	0.0439319360371252
LmxM.28.0520	729.790741374516	-0.635787592222095	0.146339031576952	-4.34462074383598	1.39516488608622e-05	8.71104089467503e-05
LmxM.25.1420	2344.93031414953	-1.13733370304052	0.165955621333853	-6.85324000416077	7.2195807646099595e-12	1.90889429670057e-10
LmxM.04.1230	8278.31586049794	-0.821915536719202	0.134641853511113	-6.10445797711305	1.03150124608094e-09	1.69640694930471e-08
LmxM.33.2340	4306.22277293991	-1.20845094365489	0.144125938458773	-8.38468742391271	5.08607233423342e-17	3.2674041253438604e-15
LmxM.24.0310	419.189305110687	-0.871863036363507	0.180334997163462	-4.83468572422035	1.33356149242714e-06	1.08251492124663e-05
LmxM.24.0630	1317.95169334364	-1.22135283336153	0.145943468529016	-8.36867073032943	5.82718287837857e-17	3.7136762470601504e-15
LmxM.27.2100	2855.16605084188	-0.990469588452254	0.118811056944417	-8.3365102030497	7.65152172377135e-17	4.730711513877581e-15
LmxM.25.0710	382.041557444972	-0.858188657625865	0.356864611168281	-2.40480179532619	0.0161812392743752	0.0384672826115026
LmxM.08_29.2800	1203.06488811819	-0.828000419456013	0.217613362427758	-3.80491533340876	0.000141852703806	0.0006769905881585
LmxM.13.1360	2129.84845411979	-0.628260621800699	0.119880547740933	-5.24072198233857	1.59949545652467e-07	1.62780335878742e-06
LmxM.29.3450	1260.13279486638	-0.989484231678226	0.180476645129685	-5.48261649570898	4.19080852866646e-08	4.82647318364486e-07
LmxM.18.1520	2755.3743818577	-1.42426454854419	0.240686483656171	-5.91750947917292	3.26853029371577e-09	4.7909313021791e-08
LmxM.27.0180	453.25661104814	-0.968594820203578	0.137180084449648	-7.06075392860034	1.65601625157366e-12	4.9160366919459194e-11
LmxM.36.1550	666.817933161204	-0.714104470552281	0.180322954673206	-3.96014180139424	7.49052713279491e-05	0.0003856894465433
LmxM.05.0350	7109.6894606553	-0.706627434587299	0.0707503347450533	-9.98761966474944	1.7267845485133802e-23	2.7306441043126e-21
LmxM.23.0220	875.400082985125	-0.703711781721848	0.1823503800887	-3.85911880951136	0.0001137966077526	0.0005613374358427
LmxM.34.1100	714.501265938647	-0.857372388720277	0.141451402664963	-6.06125052539085	1.3506726001000401e-09	2.15661762924712e-08
LmxM.24:tRNA:rfamscan:626779-626860	22.9478397272307	-2.57040750171982	0.724411456210675	-3.54827008833539	0.0003877703687078	0.0016202417387624
LmxM.34.1420	964.121127778315	-0.832009341116256	0.290075618329933	-2.86824982363711	0.0041274947911807	0.0122395923793291
LmxM.33.3670	2924.86987896299	-0.949337187481697	0.16290322123481	-5.82761458174798	5.62252450665572e-09	7.97138258934999e-08
LmxM.27.2110	641.133223695058	-1.19681078530261	0.185851769387597	-6.43959855343988	1.19789913021364e-10	2.36218814094647e-09
LmxM.33.0820	787.064215121354	-1.21565403762605	0.140588243299448	-8.6469110723345	5.2912171902653396e-18	4.06632513603289e-16
LmxM.36.5820	726.698243312296	-1.1253007966317	0.325779978065283	-3.45417420467196	0.000551980696672	0.0021901096505768
LmxM.05.0280	2883.99289025588	-1.03048615504449	0.118634703888967	-8.6862117176854	3.74726230524578e-18	2.96285941692654e-16
LmxM.05.0200	1367.99995046355	-0.656506061545502	0.108106723802605	-6.07275882991548	1.25731212206933e-09	2.02723089799532e-08
LmxM.25:ncRNA:rfamscan:456227-456366	2846.6156801673	-1.03050688659778	0.245649346342034	-4.19503207292454	2.72832979033857e-05	0.000157218331226
LmxM.11.0100	3221.52450751461	-1.03236288147815	0.116242322807722	-8.88112742882632	6.61860804346169e-19	6.04720154904283e-17
LmxM.34.1720	681.855126572621	-0.834512045213682	0.132015473036968	-6.32131996360757	2.59338406647462e-10	4.728469440935881e-09
LmxM.07.1140	608.616204789835	-0.756684848651304	0.137816834219478	-5.49051103181094	4.00772456156688e-08	4.65857313749756e-07
LmxM.30.1800	415.328546519811	-1.06216419439878	0.366028785560912	-2.90185973425859	0.0037095459531004	0.0111816702244667
LmxM.34.3310	423.431922974679	-0.654043790494148	0.230001283605654	-2.84365278419721	0.0044599620824704	0.0130420583940804
LmxM.31.2150	2773.87514666715	-0.822668302391809	0.152910323194691	-5.38007039161349	7.44567193361493e-08	8.13091106376037e-07
LmxM.36.1770	1182.92267374346	-0.83213441408223	0.11561139953091	-7.19768480840637	6.1243511456878e-13	1.9826984043697197e-11
LmxM.29.0880	2201.70947604944	-0.721298769841015	0.101682140118722	-7.09366235799956	1.3060856264573899e-12	3.9777563356885595e-11
LmxM.32.1910	1096.59721503212	-0.670327704838147	0.0839183665075138	-7.9878545393055	1.3730732479159001e-15	6.92685970405669e-14
LmxM.14.0450	3047.25940315673	-0.917280906362814	0.115007894380169	-7.9758081939198	1.5138688945383202e-15	7.54416825580497e-14
LmxM.27.1030	1024.77291995813	-0.948325534314299	0.0964794782149148	-9.82929791765496	8.420373832123371e-23	1.2364416789562601e-20
LmxM.32.3270	3991.59349614794	-0.684198541579386	0.114353199467766	-5.98320418461268	2.18790210911479e-09	3.35030149781209e-08
LmxM.16.1370	2100.82717227838	-0.839214406366776	0.129015396472307	-6.50476167429298	7.78166498577207e-11	1.6059421941898402e-09
LmxM.31.2980	1657.09605239216	-0.778153946784111	0.21949838729097	-3.54514653336646	0.000392394878982	0.0016370690461033
LmxM.34.4770	2668.99535930819	-1.19421706495527	0.0844292577415956	-14.1445879888024	2.01694455927302e-45	4.1463337777255096e-42
LmxM.32.2320	531.236017481044	-0.968956966067212	0.194263964973187	-4.98783686516925	6.10590927272897e-07	5.49331421768603e-06
LmxM.28.0210	1791.75202885624	-0.786335011189277	0.160877616592443	-4.88778381881011	1.0197741956031e-06	8.55673796984109e-06
LmxM.36.3910	5906.5664008737	-1.36401525327655	0.27599309285982	-4.94220793405632	7.72427685813613e-07	6.73560218498975e-06
LmxM.15.1010	3394.91090541258	-1.26468807035692	0.29568113333057	-4.27720245830838	1.89256666674809e-05	0.0001142626703426
LmxM.33.4550	1366.57334917299	-0.835838986285114	0.108542486847006	-7.70056970836918	1.35460917122944e-14	5.67051808358434e-13
LmxM.16.0550	5462.67608084363	-1.10138331075317	0.148085026926719	-7.43750623280903	1.02603744092799e-13	3.7498248341115e-12
LmxM.32.1250	675.717276713077	-0.776089207269781	0.159277705215809	-4.87255392220928	1.10164774493422e-06	9.19680142801433e-06
LmxM.31.0020	4054.47460044058	-0.957903619444655	0.158368203116329	-6.04858551524406	1.46123054637409e-09	2.30185800437435e-08
LmxM.04.0850	1307.89495500892	-0.70115415827913	0.122560673911114	-5.72087388151632	1.0597754422363e-08	1.39209799704619e-07
LmxM.19.0710	1601.14582884131	-1.15760604304696	0.146017562358528	-7.92785487135175	2.22963655023131e-15	1.0721813656463199e-13
LmxM.03.0740	679.563069588262	-0.603203633397512	0.168774589644334	-3.57401925650461	0.0003515430590141	0.0014885368559592
LmxM.22.0730	3081.94268769995	-0.616593047872739	0.200637825174744	-3.07316453084417	0.0021180167645481	0.0069259104026911
LmxM.26.1240	4507.18193578643	-1.23158469408386	0.144097456488657	-8.54688711442182	1.26452764136638e-17	9.04192243039632e-16
LmxM.34.4380	2346.6744789641	-1.34166279229069	0.160776922258624	-8.34487172314754	7.12912237375937e-17	4.46697455201055e-15
LmxM.28.0680	1420.48323623857	-0.833483119883614	0.125616871286164	-6.63512083488275	3.24236807700744e-11	7.28469745826015e-10
LmxM.28.2965	464.035516832563	-0.687027629357628	0.265200772089478	-2.59059437853305	0.009581034598555	0.024681969769398
LmxM.14.1200	1750.65558716754	-0.895124060560096	0.0944826224176233	-9.47395444427391	2.6944550078910902e-21	3.35704598937703e-19
LmxM.27.1805	498.88870798971	-0.947541586351899	0.308184117832099	-3.07459577416681	0.0021078803070864	0.0068973735635382
LmxM.27.0930	1676.3399029558	-1.24367106352367	0.155330122921925	-8.00663155432375	1.1789302362145501e-15	6.12351212286449e-14
LmxM.34.4125	855.329014169153	-0.834430535158475	0.264060292347323	-3.16000004294827	0.0015776911561883	0.0053853691894299
LmxM.28.2080	1002.81943093365	-1.80300197717925	0.164732731003041	-10.9450135756322	7.020720993177079e-28	1.96360987670546e-25
LmxM.29.1610	1807.86390711851	-2.10021569450141	0.507967183610083	-4.13454995178102	3.55650894508434e-05	0.0001981380288308
LmxM.25.1840	1796.12819299241	-0.6298758026807	0.0759786563154054	-8.29016770270241	1.1308890635430001e-16	6.642357692510071e-15
LmxM.27.1760	539.535101281269	-0.96927244603536	0.272504950431999	-3.5568984875276	0.0003752590790723	0.0015751686611596
LmxM.29.3530	482.795580948521	-0.756119119798406	0.176531095768624	-4.28320640341709	1.84219131953397e-05	0.000111466808098
LmxM.27.1250	942.175596867094	-1.06526868963286	0.188615045106201	-5.6478457963576	1.62470806421425e-08	2.05222341198675e-07
LmxM.34.0330	667.108880452591	-0.903023276968208	0.110538165849524	-8.16933472731489	3.1009467865746397e-16	1.72291117743265e-14
LmxM.32.0650	2577.90289885417	-0.805862408275628	0.198029152753265	-4.06941299839672	4.71317353319525e-05	0.000254140498121
LmxM.08_29.2190	1965.57105962126	-0.74152740379844	0.162886268848016	-4.55242427150403	5.30312525363291e-06	3.70183352806651e-05
LmxM.16.0880	1836.88759997512	-0.918337208009016	0.155379984203557	-5.91026709595968	3.4155345763510803e-09	4.97096297722743e-08
LmxM.21.1790	496.871757323153	-0.651474601952427	0.174739246055469	-3.7282672133404	0.0001928008876969	0.0008871861776897
LmxM.24.0320	1129.07657764303	-0.691926994551139	0.181203015209276	-3.81851810662209	0.0001342557318696	0.0006452278685938
LmxM.30.2020	860.832438929174	-0.729674975138432	0.166681025422958	-4.37767270321777	1.19953302646194e-05	7.69404062137017e-05
LmxM.26.1310	1380.73396230031	-0.654370370295285	0.0957710710051733	-6.83265169144802	8.33591836557164e-12	2.16234248328377e-10
LmxM.36.4580	448.824896200391	-0.623088523574309	0.118159174452959	-5.2732978751673	1.33993814226609e-07	1.37901268383655e-06
LmxM.36.4040	1706.46179274341	-0.908283688725983	0.14203531157949	-6.39477379692067	1.6078520065113002e-10	3.0747365231493904e-09
LmxM.36.1260	8307.11558120884	-1.13077284366921	0.177199386999076	-6.38135866505624	1.75523672241755e-10	3.33714510921749e-09
LmxM.30.2250	3731.30326740365	-0.918564403382398	0.15981699872882	-5.74760138588908	9.051832440911961e-09	1.22222033106107e-07
LmxM.21.0550	1070.31469028589	-0.872059439033293	0.125192873042982	-6.96572750378445	3.2671098543727697e-12	9.232111454469849e-11
LmxM.33.3600	297.323963711179	-1.62094106819197	0.47957844680158	-3.3799289334256	0.0007250457460027	0.0027640478300327
LmxM.07.1170	280.91538880761	-1.13757305742014	0.43629724876037	-2.60733493198106	0.0091250055060119	0.0236703218536076
LmxM.33.3490	1712.47021472816	-1.07333622918161	0.191196065291347	-5.61379873349403	1.97932425603187e-08	2.44119817623561e-07
LmxM.27.1300	1414.00875000847	-1.36430769820781	0.434738133256221	-3.13822872631173	0.0016997218583787	0.0057423224492393
LmxM.34.4090	389.017769305538	-0.638605079657597	0.150402533182919	-4.24597289781634	2.17646939806311e-05	0.0001284788791117
LmxM.34.3370	1263.04787494856	-0.762711032415219	0.216164902383166	-3.52837590194575	0.0004181179440169	0.0017320825459202
LmxM.15.0170	1911.87041694926	-0.753584749298129	0.0939917456474361	-8.01756307543039	1.07863698199145e-15	5.65812962959721e-14
LmxM.07.0040	576.827150389254	-0.931019090127203	0.230918875611818	-4.03180159118856	5.53509075856914e-05	0.0002919200996811
LmxM.28.0470	813.603948063177	-0.717168680613853	0.163700219239574	-4.38098790548522	1.18142429691745e-05	7.59566223108071e-05
LmxM.28.1930	325.942896701214	-0.970206142229013	0.268062260974358	-3.61933134004947	0.0002953652470792	0.0012843936682881
LmxM.17.0010	2995.33367371231	-1.31463296638292	0.17801080603802	-7.38513012576404	1.52304359994151e-13	5.45426678551208e-12
LmxM.34.1570	1386.13200548855	-0.751427891979895	0.10433026682751	-7.20239595689172	5.91635847650795e-13	1.9305641171557498e-11
LmxM.29.1120	2066.08041858298	-0.718038686726663	0.146900784599844	-4.88791594056213	1.01909023189351e-06	8.55673796984109e-06
LmxM.14.1340	1308.59655300289	-1.37782643774537	0.167625790621065	-8.21965660916751	2.04086693476015e-16	1.16542005587032e-14
LmxM.08_29.0760	5024.24084146439	-0.829019963896378	0.120212290090911	-6.89629956528928	5.33745828289944e-12	1.42963907036749e-10
LmxM.12.1270	1804.1944300092	-0.879984251646901	0.157065128850334	-5.60267105810245	2.11073560355769e-08	2.57898645884917e-07
LmxM.23.0200	4980.98731743017	-1.02851970138948	0.145655458841981	-7.06131929120007	1.64929130872865e-12	4.9138124752448095e-11
LmxM.08_29.0920	525.415994472175	-0.724143336638957	0.285240688492656	-2.53870981894507	0.0111262064440675	0.0280646612237935
LmxM.01.0440	1598.20809995386	-0.649015997319642	0.0948197508962794	-6.8447342582621	7.66179643777062e-12	2.0128738692584e-10
LmxM.13.1370	570.307984298191	-0.613213682214263	0.128961079797807	-4.75502906129274	1.98417872810308e-06	1.55094122444787e-05
LmxM.32.1330	1738.63728926249	-1.23230317946066	0.154021850805795	-8.00083347274186	1.23579827062272e-15	6.311782098963121e-14
LmxM.24.1190	740.745508982601	-0.895378469637745	0.145180993964148	-6.167325661504	6.945462103447981e-10	1.18490736258616e-08
LmxM.31.0230	2483.12123940432	-0.673457107511085	0.147624838008837	-4.5619498493253	5.06807541488455e-06	3.55283752230142e-05
LmxM.36.4460	2340.35213173939	-1.39489105967381	0.181149895316478	-7.70020350956796	1.3584969749071101e-14	5.67051808358434e-13
LmxM.34.3260	1042.06039617065	-0.760028687035534	0.100851864473018	-7.53608960039477	4.84273899436456e-14	1.8608337733953197e-12
LmxM.19.1485	521.697610153697	-1.39967979047765	0.158319288460346	-8.84086711157892	9.497857135717051e-19	8.397944002903361e-17
LmxM.08_29.2630	1636.99934592774	-0.721776186434014	0.254801694030861	-2.83269775414677	0.0046157006095646	0.0134401225610658
LmxM.08_29.2350	1479.08754671371	-0.790135880839586	0.168441169139799	-4.69087150650093	2.72043784947237e-06	2.02996011217888e-05
LmxM.16.0520	2667.58267702683	-0.677925312060606	0.13470868537376	-5.03252860184665	4.84052359849097e-07	4.46729804157029e-06
LmxM.33.0705	469.916318121859	-0.68140707670874	0.185550178337146	-3.6723601282162	0.0002403206923361	0.0010781135668646
LmxM.34.0070	1508.52771806676	-0.870830710669752	0.10172061168808	-8.56100544637014	1.1188741940915801e-17	8.142037608862901e-16
LmxM.07.0070	991.098593543725	-0.607512603291843	0.197582563258088	-3.07472781643334	0.0021069473927074	0.0068970654499335
LmxM.32.1035	517.694963833319	-1.07405390028511	0.382423707409373	-2.80854423895683	0.0049766044390181	0.0143036065368914
LmxM.10.1200	962.865314268405	-0.668250907117341	0.122538261307032	-5.45340614424886	4.94140321313071e-08	5.55857163085825e-07
LmxM.29.0730	1827.11385083998	-1.83796131854182	0.17500870580899	-10.502113652265	8.44672819170435e-26	1.6537487123901102e-23
LmxM.21.1330partial	1667.44754610491	-0.658464724545018	0.131763886297383	-4.99730801092875	5.81361711707576e-07	5.24757119140658e-06
LmxM.28.2430	2436.43937029794	-0.951677247023425	0.137008555281084	-6.94611548213892	3.75481443583206e-12	1.04310267249483e-10
LmxM.25.1470	235.946602699714	-0.691950400205625	0.235067670569263	-2.94362214306174	0.003243957891494	0.0099385490841117
LmxM.31.3610	3383.51920157029	-1.16962536791383	0.175448770285909	-6.66647800385163	2.62014936358195e-11	6.01829279797049e-10
LmxM.09.0770	2674.13846588728	-0.682989272267413	0.102875849043324	-6.63896608017096	3.15891073234076e-11	7.136187624186281e-10
LmxM.30.2270	1294.73421533907	-0.845490268622836	0.101620588898851	-8.32006857846889	8.79124320936653e-17	5.27667101537379e-15
LmxM.24.0130	432.710040620943	-0.68436696827138	0.227141073177647	-3.01296000189335	0.0025871301382796	0.0081779384776967
LmxM.12.0670	3453.67845104422	-1.16046532282242	0.186887478234275	-6.20943325784354	5.31760278820186e-10	9.225031166114751e-09
LmxM.24.0830	2534.68896606172	-0.813939171962209	0.128672472780338	-6.3256666664961	2.52141589076537e-10	4.607467304391931e-09
LmxM.34.5150	931.45740373432	-0.820035144869184	0.271940952036444	-3.0154897183683	0.0025656463727167	0.0081340722851346
LmxM.08_29.0870	2546.5147060122	-0.832266224366095	0.123550085863712	-6.73626585160099	1.6250883347522898e-11	3.91879805767392e-10
LmxM.34.2290	372.297956898171	-0.601391615652733	0.138190607825456	-4.35189934479722	1.34963223829463e-05	8.46531342143156e-05
LmxM.34.0100	4749.50158951557	-0.794848003888052	0.15852182590696	-5.01412344540219	5.32757760630091e-07	4.85683710162e-06
LmxM.30.1890	143.103050470079	-1.19148540093421	0.360757250825084	-3.30273445151601	0.0009574701104923	0.0035148556779368
LmxM.06.0350	1784.22479596891	-1.11712872343377	0.134181243657846	-8.32552071347901	8.3958852027793e-17	5.0764238251804605e-15
LmxM.36.3100	1692.8023378276	-0.888828839499832	0.111660444500543	-7.96010479338104	1.7189363451655501e-15	8.41357950374779e-14
LmxM.27.2270	1160.14037907076	-0.98903141364855	0.194965752769545	-5.07284689541148	3.91907812292395e-07	3.69995171122889e-06
LmxM.25.0910	8513.48819036146	-0.604925148740276	0.131787162017551	-4.59016750553982	4.42890441758441e-06	3.15042223406545e-05
LmxM.10.0990	984.669264933718	-0.808427270588849	0.174580471229175	-4.63068557953205	3.64456958767404e-06	2.64046658321089e-05
LmxM.28.0690	473.49041218402	-0.75519221982151	0.308382858885735	-2.44887871702795	0.0143301691980738	0.034821802989291
LmxM.22.0850	117.484391446592	-0.686776163234766	0.240046400965301	-2.86101420589114	0.0042228812946393	0.0124506105721832
LmxM.28.1570	1055.98149763985	-0.915724016929073	0.0962837379330856	-9.51068203818047	1.89416522504849e-21	2.4337063508709e-19
LmxM.11.0900	768.966620130946	-0.682780904734053	0.117865159278421	-5.79289850295106	6.9181920316554306e-09	9.65845383298856e-08
LmxM.30.1780	1188.69507638065	-1.03749702976647	0.192911208531277	-5.37810652717082	7.52732764281983e-08	8.20206923474646e-07
LmxM.23.0760	569.241299932066	-1.46288060799981	0.272154516998628	-5.3751840099247	7.65045108743961e-08	8.29942734723165e-07
LmxM.34.3900	910.764901436075	-0.682001533139498	0.151282949251299	-4.50811896856012	6.54049007127148e-06	4.47813903880644e-05
LmxM.27.1020	1326.95503132192	-0.766538915155363	0.129574075610348	-5.91583549058442	3.3019511773610602e-09	4.82272549403908e-08
LmxM.34.4280	696.264563655424	-0.610985132229486	0.170599457093698	-3.58140138683979	0.0003417561330734	0.0014523311019448
LmxM.17.0735	2729.54172441811	-0.624482116728257	0.134198617292249	-4.6534169228309	3.26479177189339e-06	2.3905600305445e-05
LmxM.18.0060	899.487232983599	-0.612858291848802	0.163318502039144	-3.75253436810186	0.0001750558236963	0.0008146485785256
LmxM.29.2470	134.465279320778	-1.34505766264134	0.341499011594463	-3.93868683941791	8.19287813588844e-05	0.0004184474342323
LmxM.27.0060	531.831694222414	-0.657253107782289	0.167429253402245	-3.92555717968386	8.65292115650696e-05	0.0004394871567014
LmxM.09.0920	268.161585844727	-0.741241306093454	0.226147067216462	-3.2776958605612	0.0010465809474899	0.0038046132321883
LmxM.08_29.0868	562.607589559127	-0.940627352374895	0.278063681479577	-3.38277673434306	0.0007175694233516	0.0027393562526559
LmxM.31.1030	881.155034608014	-0.661786971598873	0.161724941682199	-4.09205262166259	4.27571591057876e-05	0.0002329967656241
LmxM.29.1420	55.5297928086208	-1.56065280286283	0.66519811411938	-2.34614736532874	0.0189686060489118	0.0439253302000004
LmxM.34.0030	4516.60166604735	-0.63545052429702	0.151562157529678	-4.19267272684864	2.75687027169522e-05	0.0001584188975831
LmxM.27.1060	1547.46996617821	-0.90084051695217	0.20784742716695	-4.33414321856668	1.46328892812804e-05	9.08808523866831e-05
LmxM.19.0300	463.627147940079	-1.20711932545877	0.321019608366605	-3.76026664414917	0.0001697323424015	0.0007916670740602
LmxM.31.3070	1264.68722954707	-0.626391062865469	0.194687436739872	-3.21741902484652	0.0012934953379801	0.0045474186251436
LmxM.22.0300	3144.30551811683	-1.04814256095446	0.129313377089247	-8.10544573614432	5.25524942747721e-16	2.8244389570029502e-14
LmxM.13.1620	453.030001926319	-1.36710611913798	0.224241229709141	-6.09658679142648	1.08357130005769e-09	1.76439738621275e-08
LmxM.28.1920	1047.64162784289	-0.76782508325209	0.122531803366531	-6.26633300217809	3.69649407486694e-10	6.57927938909759e-09
LmxM.30.2790	2445.3135478295	-0.741093664358264	0.180143441070646	-4.11390867163257	3.89015394382429e-05	0.0002139714774586
LmxM.29.1890	396.956137533791	-0.624066808764011	0.154082639545945	-4.0502084504979	5.11720290394053e-05	0.0002728843027179
LmxM.28.1060	2128.77597237661	-0.85435572521069	0.266278732279058	-3.20850154985465	0.0013342859006255	0.0046634457759006
LmxM.36.7000	1164.11742801799	-0.75917272428755	0.208678866714405	-3.63799524235745	0.0002747684995942	0.0012108367482119
LmxM.36.5100	1250.57341592098	-1.54596208320289	0.502100801624248	-3.07898748259682	0.0020770540853296	0.0068127705399544
LmxM.23.1500	147.561857073743	-0.609447622052552	0.261079153283424	-2.33434042660214	0.0195779034971017	0.0450445160762918
LmxM.27.2500	867.658592828786	-0.725054747665117	0.200912276514777	-3.60881256358562	0.0003076017483178	0.0013312679875882
LmxM.25.2010	10214.759665134	-1.13995543368256	0.200353239613524	-5.68972798184598	1.27241903700475e-08	1.64773255768348e-07
LmxM.36.2020	1205.77726290134	-1.75376046470637	0.240988479834116	-7.27736224533875	3.40410308745226e-13	1.1519316744082299e-11
LmxM.08_29.0510	883.888175110437	-0.833284149278278	0.240991382421384	-3.45773421815243	0.0005447385020783	0.0021691935605763
LmxM.27.1070	3060.71778205201	-0.797256101729942	0.0863727198708246	-9.23041560949203	2.6958383319038902e-20	2.99565927070887e-18
LmxM.36.2310	971.266866656268	-0.616230316323247	0.0907323517015572	-6.79173750891184	1.1079099799557899e-11	2.794583977048e-10
LmxM.36.3000	938.73302658757	-0.636262671178789	0.134030726424253	-4.74714036216441	2.06312783423362e-06	1.60199246278594e-05
LmxM.26.2660	1217.56389068339	-1.02777692406345	0.190705855112524	-5.38933072325979	7.07205567157196e-08	7.7641540437031e-07
LmxM.34.0190	1056.85604790998	-0.603158973985932	0.145171951768936	-4.15479000341577	3.25586428836811e-05	0.000183000492435
LmxM.29.3250	705.393720898857	-0.600630504048905	0.106605585200387	-5.63413730077931	1.75936813894894e-08	2.20874568039345e-07
LmxM.29.3130	2459.43629370825	-0.702067760450554	0.172007050675282	-4.08162198987952	4.47224934214547e-05	0.0002425811763882
LmxM.33.0200	527.354159986436	-0.63773218647146	0.271865139803266	-2.34576668024797	0.0189879895834751	0.0439418155762615
LmxM.28.0890	2155.8288886116	-1.05150441855576	0.209029116129882	-5.03042082377844	4.89404460656188e-07	4.50492663247646e-06
LmxM.16.0920	569.554740061095	-0.712108706125648	0.117241150348591	-6.07388023751344	1.24855860154202e-09	2.0170721769116e-08
LmxM.14.1160	17835.0465788696	-0.82841931814268	0.124986711435136	-6.62805916429445	3.40129152983554e-11	7.559140608064231e-10
LmxM.08.1100	7909.88704433088	-1.06648008963113	0.185569408511586	-5.74706843215779	9.08039866141484e-09	1.22406751135761e-07
LmxM.31.2050	349.490164939261	-0.77542606435008	0.181845207437807	-4.26420951795106	2.00611138007014e-05	0.000119711566606
LmxM.25.2090	3294.67266886918	-0.756778680642248	0.139673710472459	-5.41818985177939	6.02054671648951e-08	6.67841278383137e-07
LmxM.21.1210	719.861639942567	-0.766682161515516	0.155612228922623	-4.92687603553796	8.35547271879388e-07	7.22471631615584e-06
LmxM.33.3680	951.598914762253	-0.607190310380946	0.170305350190262	-3.56530378935602	0.0003634349730547	0.0015317917905839
LmxM.34.2080	1775.94118990588	-0.711651423223435	0.221242780852574	-3.21660856223664	0.0012971544673325	0.0045563866659016
LmxM.24.1760	158.051051625608	-0.783920327769167	0.278308299963116	-2.81673355725668	0.0048514754507894	0.0139932623537351
LmxM.31.0270	2363.83083056554	-0.907858460445994	0.206156401833372	-4.40373644656343	1.06402196391116e-05	6.91110000729973e-05
LmxM.28.1200	1313.01246533643	-1.88893121810473	0.615912372197561	-3.06688305572604	0.0021630346369778	0.0070497954101737
LmxM.08.0470	437.778362093248	-1.05809793093021	0.161099926592354	-6.56796035424408	5.1009116926095e-11	1.0945985051042202e-09
LmxM.20.1440	2210.22839183855	-0.66726050307705	0.209213841262156	-3.1893707369052	0.0014258288976841	0.0049470848209521
LmxM.24.0140	2445.59491146934	-1.22058178705258	0.144208782308917	-8.46399066346673	2.58380517023888e-17	1.77055249290619e-15
LmxM.34.5280	451.644430065123	-0.697660388556983	0.143349456587933	-4.86685059827226	1.1339068099677e-06	9.39949112732201e-06
LmxM.36.3210	544.864398892652	-0.909333196374259	0.343483505734012	-2.64738533639642	0.0081116863428286	0.0214891742258635
LmxM.15.1540	740.262971733087	-0.683746563769728	0.117397090950276	-5.82422067050481	5.7379719299056306e-09	8.10710363910893e-08
LmxM.11.1050	2238.21352220806	-0.838523662593478	0.192320898395766	-4.3600236354342	1.30048396518655e-05	8.23297840514004e-05
LmxM.28.1530	2086.07907003164	-0.721035856182521	0.113621454614001	-6.34594811897144	2.21059728638848e-10	4.094085920264071e-09
LmxM.36.4450	2078.14972816363	-1.11884948247915	0.091016282900549	-12.2928496618752	9.895511621260292e-35	6.25929169704795e-32
LmxM.34.1380	5205.67420207383	-0.948932398692797	0.154107130734595	-6.15761512247646	7.384855871216091e-10	1.25207566657752e-08
LmxM.33.0160	299.171411396077	-0.850366881668132	0.253496777546593	-3.35454710666621	0.0007949501679827	0.0029876029393611
LmxM.31.3320	659.736478880149	-0.737951700111128	0.141261840747035	-5.22399889601196	1.7509982310628e-07	1.7688523899299e-06
LmxM.34.4470	10693.8939710696	-1.46005502522273	0.192208679086286	-7.59619717571277	3.04959751838962e-14	1.2353123346659e-12
LmxM.33.0840	488.435218335826	-1.29791869015294	0.179215137366201	-7.24223806776335	4.41340247159325e-13	1.45165634095645e-11
LmxM.33.3050	677.583986361743	-0.847995939114043	0.166665425915636	-5.08801351243231	3.61833595378665e-07	3.45169101484775e-06
LmxM.32.2140	301.341543834758	-1.08754815689175	0.338781887655616	-3.21017207979337	0.0013265553157958	0.0046418146220379
LmxM.27.0550	1306.68429219053	-0.783998087341273	0.160288505093799	-4.89116850196143	1.00239103638733e-06	8.45401178688516e-06
LmxM.12.0080	730.135723558338	-0.797286697859892	0.195804705987146	-4.07184645455984	4.66419229625466e-05	0.0002516643914179
LmxM.15.0275	1567.87169041555	-0.966999773128408	0.105862189263593	-9.13451516405552	6.57005036825291e-20	7.01630184131736e-18
LmxM.31.0140	744.7004760411	-0.862835201363124	0.174095750242058	-4.9560957126378	7.19237955921243e-07	6.29180182078764e-06
LmxM.36.5930	516.779467891422	-0.833844309682403	0.20255304624034	-4.11667128764385	3.84383683413234e-05	0.0002117071017218
LmxM.27.1530	627.009118471037	-0.825420292799953	0.140980177491663	-5.85486773733678	4.773897814893771e-09	6.86289540766983e-08
LmxM.36.6980	5701.1225058473	-1.15902947720079	0.162909414622633	-7.1145641268529	1.12267061845175e-12	3.4968638240639195e-11
LmxM.24.1500	159.263022029345	-0.905140005005796	0.283620239284447	-3.19138016133615	0.0014159483687549	0.0049190297576139
LmxM.30:ncRNA:rfamscan:480835-480981	165.290522092056	-0.958353700153552	0.360622814940519	-2.65749603311045	0.0078723516921684	0.0209903852025619
LmxM.05.1050	515.358571416422	-0.745323219640818	0.205116272940318	-3.633662063749	0.0002794267962243	0.0012280740488255
LmxM.29.3480	400.955351058624	-0.833569451501535	0.276864774248873	-3.01074578289343	0.0026060693865664	0.008226375649035
LmxM.32.1700	858.778697400219	-0.896185590586971	0.202095945850979	-4.43445605409522	9.23050453408558e-06	6.07181839951891e-05
LmxM.36.2950	1950.3440347391	-1.37385777532223	0.531149075487482	-2.58657661045784	0.0096934619078051	0.0249247458623771
LmxM.25.1015	832.75157440262	-0.624478245428035	0.112062921763955	-5.57256794306517	2.5101154670765e-08	3.035394042025e-07
LmxM.06.1070	744.23241165027	-0.62340190251808	0.11852887007676	-5.25949418158091	1.44452199688476e-07	1.47740104233624e-06
LmxM.27.0940	2775.10505183061	-0.832885068609928	0.1021288689361	-8.15523639188685	3.4849755688389e-16	1.92328551023908e-14
LmxM.34.1310	2178.65811513196	-0.749458912360262	0.197501554531675	-3.79469880192798	0.0001478227975891	0.0007018168964063
LmxM.27.0420	1816.03014943784	-1.08400093455398	0.081307141704476	-13.3321736790841	1.5044926222102599e-40	1.54643035405437e-37
LmxM.27.1260	5899.64973417019	-1.76745569072983	0.205569312463396	-8.59785767413386	8.12179341216159e-18	6.12711075488117e-16
LmxM.23.0370	2426.14513161684	-0.823261370099967	0.136238629643863	-6.04278956894991	1.51472158159404e-09	2.37701442088698e-08
LmxM.20.0420	867.748253168003	-0.643741051850811	0.129733347308541	-4.96203223925012	6.97594128485589e-07	6.14824921600965e-06
LmxM.16.1420	3099.11095290497	-0.919824013708511	0.199194566009561	-4.61771639726539	3.87986001450965e-06	2.80106136078252e-05
LmxM.18.0940	1364.36080795717	-0.794900578074044	0.110727186085248	-7.17891067386159	7.02690358890396e-13	2.2571182895139597e-11
LmxM.10.0390	453.114103444344	-1.07962823586409	0.271936870379994	-3.97014290248858	7.18295374179356e-05	0.0003714806831369
LmxM.25.0890	850.879918589754	-0.736097090163273	0.152091480687957	-4.83983117814145	1.29949470806013e-06	1.06009374845024e-05
LmxM.31.1370	1012.16037812725	-0.623024943961105	0.231827473397534	-2.68745086520764	0.0071999694288487	0.0194434642408614
LmxM.08_29.0270	368.433632169626	-0.610578654056636	0.184795303523444	-3.30408101512805	0.0009528829132103	0.0035011421784312
LmxM.18.1580	3916.40322219638	-1.06854416824848	0.0832523298352051	-12.8350061837744	1.04394638301392e-37	9.538190119470511e-35
LmxM.36.1330	660.739144750281	-1.15673379363961	0.111062324470531	-10.4151772363321	2.11403447642066e-25	3.95084215900161e-23
LmxM.28.1140	654.168433527401	-0.665067710266221	0.242558057237439	-2.74189081921608	0.0061086642535523	0.0169015969572548
LmxM.36.6300	61.4266085528981	-1.59255261047731	0.662061845612183	-2.40544387360782	0.0161528329719943	0.0384219686227103
LmxM.21.0845	1879.07532121507	-0.673044263252315	0.119121903689146	-5.65004623338334	1.6040468945574e-08	2.03236943204091e-07
LmxM.25.1710	2050.47646253741	-1.18679460954457	0.156683420733581	-7.57447472098885	3.60583595174756e-14	1.42660250329592e-12
LmxM.32.2390	4961.31732342613	-1.86786275342241	0.229529076204326	-8.13780451832448	4.02510034542242e-16	2.1919470291661302e-14
LmxM.30.1050	2539.06850915918	-0.685670635177899	0.128017049676448	-5.35608840315311	8.50429117065617e-08	9.11744280264742e-07
LmxM.14.0440	484.729233197924	-0.712153356281893	0.115478327587295	-6.16698709758802	6.96034344920582e-10	1.18498766424057e-08
LmxM.34.1220	1685.73791378864	-0.623877751295846	0.14277613424443	-4.36962209824072	1.24461734657616e-05	7.93371196968661e-05
LmxM.27.0230	682.703885834009	-1.03845229519563	0.12241059157924	-8.48335329319448	2.18795035821233e-17	1.5247047284389802e-15
LmxM.24.1850	376.447275055467	-1.82024515259531	0.15240993277112	-11.9430874320301	7.05547138914111e-33	3.86780941552716e-30
LmxM.34.3460	643.100215515873	-0.605477823670456	0.121876799160262	-4.96794983001059	6.76644621214191e-07	6.0151878056695e-06
LmxM.27.0190	2748.66927604771	-0.792848175368169	0.0991559165814611	-7.99597444814913	1.2855304279367502e-15	6.52525722773082e-14
LmxM.36.3360	387.455519216365	-1.04775456952292	0.140707400675833	-7.44633590337429	9.59682739166291e-14	3.5229781982876798e-12
LmxM.28.2200	1214.43786155188	-1.06658617051815	0.121577320388747	-8.77290408365406	1.74116344641086e-18	1.4914153145663002e-16
LmxM.30.2760	1706.65691477135	-1.00868387582329	0.166111691978454	-6.07232316888401	1.2607289304200601e-09	2.02876203421607e-08
LmxM.33.3500	2271.19730728557	-0.751242229550891	0.105754749399227	-7.10362639804413	1.21525098880534e-12	3.73434857546048e-11
LmxM.36.6760	3475.96252506159	-0.842510204329152	0.117349610419588	-7.17948872021583	6.99725957541608e-13	2.25641041131947e-11
LmxM.23.0080	2107.92555407613	-0.662999430159894	0.151418328526977	-4.37859429971037	1.19447255080551e-05	7.67355295724509e-05
LmxM.01.0770	6404.80458764834	-0.603439659780073	0.222327758994106	-2.71418945843857	0.0066438157766231	0.0181683063289564
LmxM.29.1100	411.984689804896	-0.663772855833521	0.265578275625014	-2.49934921925143	0.0124421633798124	0.0308912770145522
LmxM.23.0680	651.220291375829	-0.679488402598417	0.154512002824659	-4.3976415435473	1.09433517341582e-05	7.0856048275577e-05
LmxM.16.1320	1548.73387822927	-1.23085205544787	0.217203344159466	-5.66681908241802	1.45472798820832e-08	1.86037764339612e-07
LmxM.33.2700	2555.68990811224	-1.22120724246327	0.159671689700447	-7.64823898810315	2.03750280126748e-14	8.37719276741125e-13
LmxM.05.1140	1567.74465129554	-0.615049716334591	0.140952391234417	-4.36352807460857	1.27981507807245e-05	8.14544844194253e-05
LmxM.23.0660	597.994887386843	-0.678464672726501	0.234694764621855	-2.89083854861296	0.0038421545004393	0.0115264635013179
LmxM.15.1490	925.164415131747	-0.684617914705053	0.141693039692171	-4.8316975639198	1.35373791460867e-06	1.09457098051397e-05
LmxM.22.1290	1067.43177278456	-0.667641469186687	0.153921710520982	-4.33753930440941	1.44086773822925e-05	8.97595106928721e-05
LmxM.34.3860	2509.85013105914	-1.08788877429561	0.137519360080453	-7.91080451260938	2.5573083014642403e-15	1.22260152110119e-13
LmxM.08_29.2140	810.150954075484	-0.926023221985497	0.14844419113766	-6.23819103252582	4.42659883955075e-10	7.794415900990541e-09
LmxM.28.2310	2310.78741976413	-0.663866118348868	0.137047206856167	-4.84406894221202	1.27206760751393e-06	1.04081710811812e-05
LmxM.23.0690	1544.60067994138	-1.48626847463614	0.39199157843968	-3.79158266754664	0.0001496903043897	0.0007086375204358
LmxM.28.0550	843.900353043184	-0.823509988211021	0.116400337583344	-7.07480755905352	1.49656296279625e-12	4.50777920991704e-11
LmxM.30.2280	299.367136028947	-1.4039513703778	0.328979078084649	-4.26760078042577	1.97586515922263e-05	0.0001180780465427
LmxM.08_29.2390	156.460234771629	-0.886175714230047	0.376453918723119	-2.35400847263281	0.0185721877618088	0.043238703274449
LmxM.31.2950	3571.14936751978	-0.895963822623796	0.183297083567686	-4.88804188907317	1.01843863672261e-06	8.55673796984109e-06
LmxM.17.0780	1726.05372827986	-0.621933079302171	0.0779846684988695	-7.97506857788576	1.5229623379102802e-15	7.54416825580497e-14
LmxM.36.0330	516.792371279115	-0.731459343708584	0.156881817946724	-4.66248640716915	3.1241172748939e-06	2.29987612815152e-05
LmxM.07.1000	2982.11635884262	-0.843898938968276	0.0993813879431429	-8.49151894971601	2.03953664269323e-17	1.4334281891338901e-15
LmxM.29.1130	295.229285866534	-0.736575942807933	0.15654116276815	-4.70531794821826	2.53470607903711e-06	1.90868938534086e-05
LmxM.27.0770	308.463703908153	-1.04411199594806	0.425992556772755	-2.45100995157771	0.0142456014754032	0.0346675291305831
LmxM.31.1000	4678.90334089578	-0.816360764030902	0.10832645184957	-7.53611652641004	4.84173968121801e-14	1.8608337733953197e-12
LmxM.28.1500	1092.01256816654	-0.88835686321518	0.135837259160832	-6.53986151298417	6.15758249560928e-11	1.2949821192172702e-09
LmxM.32.0420	564.21842913053	-1.23231254522967	0.213124235435604	-5.782132391987	7.37596218788752e-09	1.01595539482411e-07
LmxM.24.0761	1409.38215508167	-1.39537785371929	0.24353042592477	-5.72978858153168	1.00555882965132e-08	1.33366294455206e-07
LmxM.32.1355	940.188463235708	-0.624747715685685	0.145328473792858	-4.2988665564338	1.71673790866878e-05	0.0001047235595176
LmxM.06.0650	1608.52227042309	-0.657938637354219	0.114429426135761	-5.74973291025359	8.93845403498085e-09	1.20889650542183e-07
LmxM.12.0640	356.213567026785	-1.23226502534684	0.294764247337457	-4.18051048075751	2.90855404528676e-05	0.0001660782927876
LmxM.17.0290	442.309009143611	-0.610360882684393	0.171026949293775	-3.56879945064078	0.0003586208021888	0.0015161639364518
LmxM.27.1870	1786.75329712249	-0.906885921105027	0.386533171621112	-2.34620464086321	0.0189656912195239	0.0439253302000004
LmxM.25.0130	1035.92509912085	-1.17667441201247	0.0784217580512745	-15.0044380698928	6.8670040924573e-51	1.88224582174255e-47
LmxM.22.0275	496.835998124667	-1.14415965640635	0.147496826895978	-7.7571814966112	8.68376139402707e-15	3.75824052332024e-13
LmxM.21.1660	1396.6070232639	-0.726640169338609	0.136247498160931	-5.33323678707351	9.64773717125766e-08	1.02102114233271e-06
LmxM.04.0580	1580.27437731813	-0.693197081933312	0.0955867138879432	-7.25202335908263	4.10591049896859e-13	1.3614073400410798e-11
LmxM.20.0310	336.434326619437	-0.877830772032726	0.191960938304232	-4.57296562408693	4.80869056844224e-06	3.38663817007475e-05
LmxM.25.1620	3245.57601600856	-1.34282746481701	0.149612003626585	-8.97539924783412	2.82325999938991e-19	2.7312549382333202e-17
LmxM.24.0250	506.884697304938	-0.67262436014106	0.133819196524502	-5.02636675163345	4.99859516116136e-07	4.58232419289073e-06
LmxM.29.0090	1554.997392314	-1.1108636516103	0.130967350495393	-8.48198919355382	2.2137613289799202e-17	1.5297276813615e-15
LmxM.29.3110	802.802556800734	-0.745767524619594	0.233187330426384	-3.19814770063173	0.0013831341881714	0.0048152042461193
LmxM.25.1780	1085.86852420507	-0.803414934410298	0.165063337504201	-4.86731303606319	1.13125767419629e-06	9.39949112732201e-06
LmxM.23.0510	750.21804933206	-1.04338152724098	0.114931112172034	-9.07832098308764	1.10262575843285e-19	1.10571848921869e-17
LmxM.17.0250	947.514280709514	-1.21133501092392	0.202897870696558	-5.97017113469625	2.37004854368353e-09	3.62247382429548e-08
LmxM.31.0530	862.993389288856	-0.664416868013236	0.132931483152729	-4.99819043807603	5.78708177853393e-07	5.22935972141588e-06
LmxM.26.1100	2420.17017404384	-1.22689493221706	0.104232915315378	-11.7707053333857	5.52605368206703e-32	2.67298467221395e-29
LmxM.08_29.2530	196.312562382223	-0.813270339493655	0.34343130471758	-2.36807282365376	0.017881015935055	0.0418189971655168
LmxM.16.0540	3585.37861302052	-0.625611746021887	0.121286685796708	-5.15812384444648	2.49436620154096e-07	2.4505583363526e-06
LmxM.07.0640	2398.91274221591	-1.49163668878531	0.190250668817851	-7.84037553220602	4.49200995693567e-15	2.04076231358464e-13
LmxM.05.1040	2809.40140855355	-0.739551749138916	0.142398555398456	-5.19353407111133	2.06339159188923e-07	2.04918708455376e-06
LmxM.29.0870	1874.88831910605	-1.23447746389824	0.272147559331453	-4.5360592868472	5.73150744278689e-06	3.96718734865628e-05
LmxM.28.2170	2309.39784961741	-1.13610693589564	0.169695375919025	-6.69497875085154	2.15702973507963e-11	5.03899304305676e-10
LmxM.22.0450	1162.90867613369	-1.28565971261284	0.13330573878779	-9.64444384993423	5.18917075916657e-22	7.356991578039091e-20
LmxM.30.1610	672.476916289802	-0.793631815123399	0.167707102151215	-4.73224929024063	2.22045473728647e-06	1.70962540306242e-05
LmxM.30.1800a	240.744212984461	-0.979725862943161	0.321466540578185	-3.047676007528	0.0023061842691519	0.0074607395546464
LmxM.33.1050	767.265535221929	-0.693323461883153	0.106057069500834	-6.5372677667442	6.2652820939401e-11	1.31427078210381e-09
LmxM.07.0100	1435.53840236839	-1.44667429807741	0.104228773889779	-13.8797977188839	8.39806147941981e-44	1.38114519090538e-40
LmxM.04.0090	1278.95048766841	-1.11074687848926	0.179222863174213	-6.19757356185946	5.73402418472972e-10	9.905647241813551e-09
LmxM.03.0690	5877.12952558306	-1.03072761705768	0.158443432456204	-6.50533506551359	7.752039616859239e-11	1.60566805464568e-09
LmxM.27.1000	1294.62842932077	-0.778083423305678	0.0857354543793082	-9.07539860771374	1.1326216154642501e-19	1.1221141619231901e-17
LmxM.32.1690	951.572149976229	-1.14543252932092	0.197648581152295	-5.79529851741424	6.8199761144031904e-09	9.53752782121385e-08
LmxM.33.2970	460.640758067788	-0.656714440805237	0.178826421835776	-3.67235688140272	0.0002403237465721	0.0010781135668646
LmxM.34.0020	322.928048653416	-0.773320653711468	0.186295505400799	-4.15104300046173	3.30963571318322e-05	0.0001857984759366
LmxM.18.0740	2632.29266775242	-1.48721092902339	0.127639739707245	-11.6516292843786	2.2511316794187603e-31	1.02839198888114e-28
LmxM.27.1050	1400.99602313546	-0.868166982742464	0.0968306756789098	-8.96582592918491	3.0796407605099104e-19	2.94463790391547e-17
LmxM.01.0470	4485.21546369925	-0.713006352411012	0.149396978351958	-4.77256207104318	1.81897022529115e-06	1.43407403284459e-05
LmxM.34.0200	1180.75690841819	-0.658375612142465	0.118297185901787	-5.56543764861035	2.6149527469364e-08	3.13908853110335e-07
LmxM.32.3240	2218.99057707593	-1.31428750757487	0.239130817223952	-5.49610260539529	3.88276649095203e-08	4.5223780248015e-07
LmxM.27.1100	1029.18159768962	-0.936816221950044	0.0988038092055721	-9.48158000670698	2.50461510480992e-21	3.16853077028492e-19
LmxM.36.3880	2680.64462108684	-1.17795318223588	0.157953852723615	-7.45757803259817	8.81273721819096e-14	3.24964745045669e-12
LmxM.23.1220	3390.50323899201	-1.34105039720348	0.189311369700171	-7.08383442224004	1.4021943427517998e-12	4.23906032369413e-11
LmxM.21.0840	1054.97461618545	-0.848997191405109	0.18928074449853	-4.48538594696674	7.2782070621141e-06	4.90563087473477e-05
LmxM.13.0250	365.087889778722	-0.693060771205791	0.231144138005443	-2.99839215991483	0.0027140818904588	0.0085247881532632
LmxM.32.1070	986.939260705009	-1.21902433816339	0.425973870317511	-2.86173501030651	0.0042132901109487	0.0124309495434215
LmxM.29.3660	954.480732772083	-0.84684024342859	0.127355251761055	-6.6494332327766	2.9422377733350397e-11	6.68343127351768e-10
LmxM.07.0870	1631.23575749942	-1.22225788437898	0.264392851761944	-4.62288551386209	3.78438608688313e-06	2.73693991138434e-05
LmxM.26.1190	911.963192488668	-0.631789159561655	0.129069706708396	-4.89494534134987	9.83330551443225e-07	8.31030536949398e-06
LmxM.17.0280	958.207285452005	-0.914022504065926	0.179187643630736	-5.10092373305335	3.37999753126738e-07	3.24692987144996e-06
LmxM.19.0440	4044.00639513915	-0.91915929779269	0.136181274176685	-6.74952781393534	1.48327074875487e-11	3.59791603746645e-10
LmxM.29.0830	2007.85024794163	-0.711461614062816	0.150757522143568	-4.71924454545813	2.36722108269422e-06	1.80739637539411e-05
LmxM.28.2860	366.56529155076	-1.04022899927559	0.197089940367149	-5.27794060588682	1.30643792509587e-07	1.35130051044822e-06
LmxM.36.4920	374.978565968067	-0.905167505051437	0.283769148977485	-3.18980237391223	0.0014237011531917	0.0049438744014763
LmxM.02.0420	959.170804771858	-0.785551702682059	0.224199466039878	-3.50380719703558	0.0004586573006404	0.0018726608655245
LmxM.36.4310	1004.00715230087	-0.638130915536211	0.146737219864952	-4.34880063915283	1.36884074518089e-05	8.57271702027604e-05
LmxM.16.0760	2973.59708426955	-0.712977962176342	0.160329061491438	-4.44696647971347	8.70914215390973e-06	5.76612527629627e-05
LmxM.32.3060	1230.98017646278	-0.729441792077927	0.216997351828025	-3.3615239353521	0.0007751363819665	0.0029251704767831
LmxM.10.1320	415.058264774797	-0.895719867590126	0.281209344528149	-3.18524218707272	0.0014463291133193	0.0050139815762331
LmxM.19.0210	1202.69714197322	-1.41092421187574	0.185963578839613	-7.58709969274475	3.27145385599818e-14	1.3122519540425899e-12
LmxM.34.5090	1220.1899001817	-0.620540331498351	0.120197783548217	-5.16266035179777	2.43464659510878e-07	2.3947486784186e-06
LmxM.26.0930	807.325784336387	-0.696358970800621	0.0838385123822472	-8.305955711925	9.901916637495591e-17	5.9002507616033506e-15
LmxM.11.0480	1173.53084803858	-0.954028592787068	0.163359586759556	-5.84005268200925	5.218431788193e-09	7.43694360386673e-08
LmxM.07.1050	3016.1102450415	-0.848022457497816	0.209672898772383	-4.04450199555077	5.243446180509e-05	0.000278532674046
LmxM.34.4710	1910.29300512154	-0.828292548967775	0.0947844523882903	-8.73869635891996	2.3581574280123897e-18	1.93911285305459e-16
LmxM.22.1450	610.988362696072	-0.60759820708885	0.218568369266283	-2.77989998794661	0.0054375642177519	0.0153811801040848
LmxM.11.0580	408.422604017562	-0.794148377562252	0.225855260485527	-3.51618277942719	0.0004377994767615	0.0017982143343708
LmxM.27.1400	251.587752665832	-0.808972395995433	0.206561906459903	-3.91636778464992	8.98930785921426e-05	0.0004529355301857
LmxM.24.2110	2361.01906414843	-1.56192503373719	0.248650669839831	-6.28160396568933	3.35097589768431e-10	6.02955685047223e-09
LmxM.09.1350	451.094391079194	-0.888624727215566	0.116421081157151	-7.63285066916752	2.29618805338063e-14	9.347304140073699e-13
LmxM.24.1800	706.08690971079	-0.788711977846063	0.137320565931698	-5.74358234321845	9.26942554521861e-09	1.24546546173746e-07

## Sheet: T7-vs-DAC1_up
Supplementary Table 4. List of DE genes in DACs mutants compared to parental cells.
T7-vs-DAC1_up
	baseMean	log2FoldChange	lfcSE	stat	pvalue	padj
LmxM.15.1000	20980.9218852972	0.741133826575238	0.22844359432233	3.24427493260989	0.0011775003174855	0.0041879693385309
LmxM.34.0800	1568.09374929404	1.03548777558616	0.102487012787726	10.1035999334949	5.32507268362306e-24	8.93634136274131e-22
LmxM.22.0460	9659.18363414133	0.623009374392794	0.211601627802394	2.94425605730498	0.0032373204023886	0.0099219104244659
LmxM.25.1520	1918.33899649757	0.703348602714287	0.107267930617555	6.55693270733405	5.4925783244103597e-11	1.15808901440068e-09
LmxM.13.1510	438.905275490969	0.692198622551804	0.197028597114415	3.51318860657492	0.0004427630625666	0.0018151071297834
LmxM.15.0860	712.542587949161	0.709868867356515	0.148827651138181	4.76973775993703	1.84465902683694e-06	1.45015594432889e-05
LmxM.24.1860	1578.771852028	1.43691199916964	0.184332719693257	7.79520858565299	6.430217092433541e-15	2.84277823392908e-13
LmxM.10.0465	187.993074443084	0.930197846499686	0.262289953862127	3.54644862604477	0.0003904608657699	0.0016303480644545
LmxM.36.2450	421.101516805314	0.68079204203806	0.223330620801137	3.04835960064906	0.0023009440389442	0.007449079855212
LmxM.14.0510	430.19572292693	1.19881993146224	0.1940732711732	6.17715115644316	6.526857906211801e-10	1.12046665057995e-08
LmxM.33.3320	1145.74541011164	0.931450831412053	0.22392112747318	4.15972731971715	3.1862776350658e-05	0.0001798267741465
LmxM.21.1130	1317.78532348907	0.636907278116019	0.146670800547668	4.34242722980858	1.40917167617895e-05	8.79181994933196e-05
LmxM.16.0370	1275.76120192119	0.864997908899059	0.165949794637397	5.21240722707187	1.86405795304609e-07	1.86928640828024e-06
LmxM.15.0010	29627.4686923376	1.45565277282668	0.245486886073057	5.92965594257234	3.0357008898648e-09	4.49776007519969e-08
LmxM.23.1660	1154.98373328559	0.631935999717491	0.172534059590592	3.66267391619382	0.0002495961827142	0.0011148448726013
LmxM.30.0460	15.2594478099799	1.54665013868506	0.580868851463203	2.66264946861768	0.0077528129272981	0.0207456494309056
LmxM.33.2140	628.761850246836	0.642837014782515	0.104652570171066	6.14258220062565	8.11906367602085e-10	1.36251144097795e-08
LmxM.31.1330	841.314165235719	0.636559555428608	0.117611777262782	5.41237935726735	6.2192755489588e-08	6.86457756229372e-07
LmxM.31.3700	1773.41107715967	0.779793503130805	0.12962927392569	6.01556638801989	1.7925881750159902e-09	2.78121746474651e-08
LmxM.20.1610	803.619639025494	0.641406153064169	0.207759858935144	3.08724773087373	0.0020201916085904	0.0066608001593579
LmxM.30.0600	1288.99007050918	0.777603774213331	0.138114153560549	5.63015269736588	1.80050147367691e-08	2.24643180272962e-07
LmxM.32.1640	422.153865360677	0.878121954000971	0.306483085413823	2.86515633583923	0.0041680341255694	0.0123286851131503
LmxM.30.0450e	76.6125136417883	0.989050643357066	0.286837820300894	3.44811797244711	0.0005645074146242	0.0022252849810426
LmxM.28.2565	653.792083243806	0.605010544067808	0.148269251642166	4.08048558529144	4.49417164150774e-05	0.0002436095808049
LmxM.33.1560a	60.0294223393787	1.95970585610099	0.397995377479404	4.92394124904729	8.48183110487743e-07	7.3185831243869e-06
LmxM.16.0120	1280.8994313919	0.668359735114453	0.0855459058408541	7.81287810965309	5.589664738646461e-15	2.48453044031837e-13
LmxM.19.0860	105.332213398872	0.721385419178253	0.271937172812584	2.65276501817361	0.0079835427838788	0.0212317827657941
LmxM.34.2610	137.457507717047	1.73658251223633	0.288286153205194	6.0238152021137	1.7035286299281202e-09	2.6580865130738e-08
LmxM.36.3740	16475.3071314022	0.677090983531555	0.220354041754786	3.07274138536126	0.0021210221469652	0.0069293464896682
LmxM.16.1170	25645.5325617363	0.653854732587185	0.190961278604766	3.42401735767843	0.0006170267970819	0.0024057901149382
LmxM.34.3660	1439.37527792184	0.769808907024219	0.0867941474078622	8.86936423727675	7.35646852206683e-19	6.64749897329181e-17
LmxM.10.1228	407.317224871893	0.963184728564504	0.224309748769246	4.29399405888222	1.75487172052716e-05	0.000106733063298
LmxM.04.0230	1073.34155886745	0.811854062270182	0.176863997847362	4.59027315989335	4.42666307392388e-06	3.15042223406545e-05
LmxM.17.0237	651.17631448675	0.842847017251508	0.134639829398938	6.26001251646089	3.84946574768426e-10	6.8220165610361305e-09
LmxM.33.4280	766.581733009389	0.706223017174463	0.134074158692612	5.26740591968659	1.38365030604346e-07	1.42044400332027e-06
LmxM.31:ncRNA:rfamscan:482645-482735	285.152399967769	2.19546424125876	0.362400585568932	6.05811449728234	1.3772635284445901e-09	2.19481356480618e-08
LmxM.03.0290	720.092728184639	1.08855771254056	0.150141166342558	7.25022816232115	4.16070139316759e-13	1.3740340383942599e-11
LmxM.31.3410	1075.79418927769	0.601083391531718	0.105505136001532	5.69719555191121	1.21794203706967e-08	1.58718500330014e-07
LmxM.31.0160	1066.34848140399	0.610380859970744	0.0929374978706044	6.56764894639803	5.1115873277395396e-11	1.0945985051042202e-09
LmxM.27.2337	1070.13045193153	0.881104427918534	0.144359260424226	6.10355321390015	1.0373600856212502e-09	1.70136700400237e-08
LmxM.19.0995	165.851811284283	0.796713219688282	0.277761416550466	2.86833653709974	0.0041263636071314	0.0122395923793291
LmxM.01.0760	820.265351992026	0.817366698342174	0.176133647022834	4.64060508686457	3.47390457674148e-06	2.52795728624294e-05
LmxM.01.0050	947.396846485193	0.6739919714785	0.211914784395509	3.18048584199104	0.0014702832348692	0.0050927291661034
LmxM.27.1700	992.735349589545	0.909348557809143	0.104685090156883	8.68651454038366	3.73729130801632e-18	2.96285941692654e-16
LmxM.18.0760	563.635045815362	0.797948320300751	0.21791117152064	3.66180547207591	0.0002504440022216	0.0011174178134936
LmxM.31.3500	332.368347180413	0.842115929730787	0.201458834339689	4.18008935915343	2.91394567060356e-05	0.0001661676508278
LmxM.26.2510	1073.80806900791	0.777655113522354	0.175828308587475	4.42280949961745	9.74256393951728e-06	6.36829119830291e-05
LmxM.07.0730	1337.72252396117	0.899408977119598	0.108700045803647	8.27422813366856	1.29290408517157e-16	7.487007248144961e-15
LmxM.01:ncRNA:rfamscan:118986-119169	465.146632371705	0.611918215319781	0.238090332878777	2.57010945350451	0.0101666387782608	0.0259592932180913
LmxM.02.0300	1337.82339487612	0.646865446994615	0.232509990744149	2.78209742697215	0.0054008824082332	0.0152984691846029
LmxM.23.0460	638.777342636928	0.749807921194491	0.160311021196888	4.67720756562086	2.90807859778625e-06	2.15782098442481e-05
LmxM.29.2790	1592.25092857855	0.865816525496654	0.178841986842492	4.84123745649946	1.29033071903011e-06	1.0536633071087e-05
LmxM.11.1020	1455.37580409083	0.896788238009986	0.100371636602631	8.93467784689368	4.0836629251898403e-19	3.85976554411909e-17
LmxM.25.1910	947.212146613628	0.608093197224255	0.120585615587019	5.04283362707911	4.58688045813364e-07	4.26673280624807e-06
LmxM.36.4840	1171.88343849201	0.955985652242985	0.0882672330890022	10.83058365814	2.46578561022355e-27	6.33629846027132e-25
LmxM.08_29.0940	3341.12080332413	0.628254884071544	0.271234875305307	2.31627619185906	0.0205431934071325	0.0468330134147076
LmxM.08_29.1950	1221.52250539876	0.751396652232282	0.117775511048628	6.37990568278695	1.77197080951765e-10	3.35735390936951e-09
LmxM.23.1665	5282.25339122122	2.13600916638416	0.185548352192301	11.5118735421073	1.14953521422945e-30	4.501251460289869e-28
LmxM.20.1220	404.538819778185	0.831280924218096	0.356733615592222	2.33025677391817	0.0197925839129487	0.0454367441418697
LmxM.28.3000	440.124782729072	0.682197457400085	0.186567743302099	3.65656702131749	0.000255615601073	0.0011380222456002
LmxM.21.0990	788.592000813695	0.700121827107491	0.226040940519007	3.09732310217768	0.0019527690570753	0.0064618188959077
LmxM.10.0250	1337.87787653102	0.931859790144636	0.158498508629627	5.8792968981315	4.12012789810763e-09	5.93341711140789e-08
LmxM.09.0700	1201.1561569535	0.669003263465177	0.123312916935066	5.4252488716771	5.78738456424512e-08	6.4310355772686e-07
LmxM.11.0040	1726.94585381967	0.844205237980486	0.156989914303348	5.37744887451334	7.55486559221633e-08	8.20723243170595e-07
LmxM.36.1270	232.581078344333	1.22085475886548	0.192019275013965	6.35798025368387	2.04423741093366e-10	3.8117379206593e-09
LmxM.33.1820	26.8177874263656	1.36378146227269	0.423144192461952	3.22297100271633	0.0012686839625663	0.004473579855996
LmxM.33.2900	3336.77828267871	0.875986767645528	0.135841958174294	6.44857288144785	1.12908264954527e-10	2.23721605474957e-09
LmxM.24.0800	697.700134463464	0.766527473891237	0.122489583925286	6.25789923785509	3.9019778113795603e-10	6.900207213542811e-09
LmxM.21.1855	1292.95336374838	1.34013831985615	0.240734821732663	5.56686527611855	2.5936276451231e-08	3.12114326678037e-07
LmxM.10.1300	1343.65951374053	0.66256315418756	0.204572720941054	3.2387659074959	0.0012004805940968	0.0042623281197143
LmxM.26.1780	28.8614697462125	1.56862479103704	0.570330159630582	2.75038022196315	0.0059526149399165	0.0165701938561047
LmxM.14.1230	1068.60756374695	0.690618256628116	0.107899077115302	6.40059465837798	1.54772960687974e-10	2.98055750758129e-09
LmxM.29.1850	698.101823038852	0.786040387370467	0.141905307508257	5.53918948609257	3.03874717669984e-08	3.61092746156109e-07
LmxM.05:ncRNA:rfamscan:125203-125307	614.931730710184	0.686461751986648	0.125840001006711	5.45503612917198	4.89628891468757e-08	5.53051974525768e-07
LmxM.21.1860	3028.77417619555	1.12804457598261	0.123646662954279	9.12312996590719	7.29853646902035e-20	7.59694498541195e-18
LmxM.30.1980	138.53402750412	1.05277637350803	0.360727052325493	2.91848467344248	0.0035173716594653	0.0106649510161445
LmxM.23.0845	1975.14158523308	0.614506110915713	0.111807362333566	5.49611490773206	3.88249577425244e-08	4.5223780248015e-07
LmxM.23.0355	714.430830784932	0.740353322911066	0.124035702931885	5.96887271496043	2.3889838615599e-09	3.63789153585316e-08
LmxM.30.0450c	291.347852459569	0.604753397656202	0.181781664010242	3.32681187043227	0.0008784565859851	0.0032626687021479
LmxM.12.0420	289.306307845669	0.97574012917179	0.16849915556758	5.7907716266296	7.006378920311671e-09	9.73200234150724e-08
LmxM.14.0880	1692.92288782352	0.760880102023403	0.0807280609265136	9.42522455377726	4.29186229141136e-21	5.267460242130681e-19
LmxM.22.1150	2418.16026217171	0.689596072085922	0.13002719574154	5.30347569332078	1.13618338603026e-07	1.18563908417853e-06
LmxM.34.0830	1326.84911381939	0.656564013912329	0.127782439480241	5.13813961122456	2.77471712549024e-07	2.70658350212411e-06
LmxM.32.2850	1380.45004976782	0.683069472409518	0.10231429516216	6.67618802755672	2.4523729534259098e-11	5.66763308044567e-10
LmxM.31.1260	476.395818304751	1.17364102004388	0.380993834889898	3.08047247111766	0.0020667245904565	0.0067897228555031
LmxM.31.0630	3829.66093557998	0.73784509150891	0.148741373237899	4.96059082585442	7.02790909223998e-07	6.18080176101491e-06
LmxM.34.2300	1809.73467689829	0.793837119726826	0.143194189672055	5.54378024377164	2.96010302197861e-08	3.52767060141017e-07
LmxM.34.3300	2485.81407486596	0.745145457633234	0.13257374083739	5.62061123814255	1.90283024974382e-08	2.35647185898245e-07
LmxM.18.1400	17670.5687156942	0.776496111033461	0.22132680929606	3.50836897483474	0.0004508632609408	0.0018435845821566
LmxM.34.0610	3664.47749871396	0.757338344851437	0.121488076056947	6.23384919270958	4.55111233335328e-10	7.97948757295608e-09
LmxM.32.1560	1084.04969169708	0.733399544027836	0.154697400187288	4.74086534835058	2.12807334545001e-06	1.64672648201814e-05
LmxM.23.0860	2348.62688735176	0.654230122629472	0.137381808493881	4.76213066199816	1.91559579280786e-06	1.50018516231039e-05
LmxM.31.2280	1593.53537306202	0.633357621671917	0.164404276776738	3.85244005867328	0.000116946609938	0.0005743983899959
LmxM.03.0100	1977.1335822632	0.713309527271426	0.113286943237948	6.29648489829223	3.04470927845845e-10	5.5146793825471e-09
LmxM.28.0620	1842.06083423306	0.731337465430432	0.112441188289093	6.50417766441705	7.81195278701126e-11	1.6059421941898402e-09
LmxM.05.0340	3020.5496569606	0.605259735162066	0.127014103373164	4.76529549938112	1.88577073889602e-06	1.47823572792583e-05
LmxM.28.1190	1503.87144892989	0.668261072393431	0.137841663294201	4.84803401542779	1.24691024024363e-06	1.02226748808808e-05
LmxM.28.2660	743.201589073467	0.752302186095124	0.197936087720512	3.80073282623117	0.00014426879039	0.0006869266145788
LmxM.01.0800	1287.78137166981	0.837919370667498	0.150418065205174	5.57060330170153	2.53858745618477e-08	3.06232597526777e-07
LmxM.36.3320	534.104504926715	0.94416347908691	0.160464570324838	5.88393735249835	4.00619531394633e-09	5.77946387132994e-08
LmxM.13.0390	930.144880436874	1.20399892559833	0.191658760282844	6.28199266144426	3.34260629486192e-10	6.027686746195071e-09
LmxM.30.0460e	126.862618870933	0.946864115100548	0.248719071338622	3.80696224863041	0.000140684210519	0.0006718038693951
LmxM.07.0950	1378.00538039916	0.768330089733942	0.163726038109695	4.69277885548766	2.69518788019636e-06	2.01477544898679e-05
LmxM.19.0770	1515.58309412264	0.709652594509916	0.13683579088604	5.18616211383563	2.14671959434307e-07	2.12936974961195e-06
LmxM.06.0010	18282.1105926733	1.30320203334539	0.201187301183664	6.47755611650506	9.322010852444819e-11	1.8834126594509503e-09
LmxM.10.0970	11156.7319572279	0.799589932880682	0.253879946459783	3.14948046913719	0.0016356104095382	0.0055485249165154
LmxM.34.0080	647.532811299889	0.788968057206561	0.120920503550944	6.52468385458029	6.814511466380239e-11	1.42222659360519e-09
LmxM.30.1170	2795.88033835497	0.862559610751154	0.179762131830698	4.7983387934202	1.59986998165924e-06	1.27354606574869e-05
LmxM.36.2480	1578.18019075312	1.12341240355459	0.18185740790146	6.17743547825839	6.51511869284034e-10	1.12046665057995e-08
LmxM.23.0610	671.644481835549	0.909706538302322	0.288140274712668	3.15716551325384	0.0015931089206213	0.0054244863992833
LmxM.34.2820	233.646772109007	1.46101672312198	0.277030614082685	5.27384573708491	1.33594214635518e-07	1.37662309141336e-06
LmxM.16.0070	1077.37974370889	0.708462545703899	0.207430242746537	3.41542552485745	0.0006368244132008	0.0024734309941121
LmxM.32.2100	913.285819940368	0.793040193017182	0.146165204839006	5.42564281212261	5.77463365287781e-08	6.4255497331007e-07
LmxM.33.1070	1073.80661541966	0.744255493898332	0.0994552480255158	7.48332047502801	7.2467874265095e-14	2.70865150037216e-12
LmxM.26.1260	2533.57156453366	1.63363320959481	0.150984116820001	10.8199010863002	2.77076248392843e-27	6.70117056039513e-25
LmxM.14.1150	642.794680025745	0.753604002410738	0.153276721551231	4.91662396470852	8.80494499995521e-07	7.54985012874157e-06
LmxM.24.1410	2361.32052863289	0.819325852700098	0.1027343844862	7.97518627086486	1.5215117332978401e-15	7.54416825580497e-14
LmxM.08_29.2720	1416.86201866111	0.650535876284983	0.16070112529013	4.04811027371777	5.16328202464124e-05	0.0002748069131949
LmxM.36.1980	1187.6130695435	0.891618210141876	0.131196592537997	6.79604700772731	1.07528705639469e-11	2.72064168145647e-10
LmxM.33.1350	503.812548259894	0.661837226579621	0.168086704776827	3.9374751706767	8.23434491209004e-05	0.0004197831259275
LmxM.20.0200	907.046892327436	0.77283221579588	0.12103288583909	6.38530768260241	1.71053191584724e-10	3.2635043953623704e-09
LmxM.17.0340	1527.11901887563	0.833814177262912	0.191159776196776	4.36187044080132	1.28955229108648e-05	8.18609757423372e-05
LmxM.33.1600	11.6959049903429	1.87669558033644	0.571781548464929	3.28218982472386	0.0010300423843942	0.0037544497016283
LmxM.34.5100	12077.5995782062	0.625011715618897	0.247114345536594	2.52924092392015	0.011430953103142	0.0287627684721961
LmxM.08.1030a	533.310870124647	0.631718082067091	0.134889225122122	4.68323605162061	2.82381005204435e-06	2.10327808496021e-05
LmxM.32.1760	32.7582405659844	3.09233475450923	0.532256840081988	5.80985441921779	6.2527190508989505e-09	8.80412821156543e-08
LmxM.28.1650	1634.3842209329	0.653142511519696	0.242703096358239	2.69111734180611	0.007121314203248	0.0192626864122725
LmxM.09:ncRNA:rfamscan:190672-190760	157.395770633025	0.955622039622705	0.366755823517061	2.60560835942187	0.0091711259208341	0.0237824561485398
LmxM.09.0003	480.575567152472	0.689491641710333	0.222576877290093	3.09776851083994	0.0019498367019137	0.0064547130434125
LmxM.19.0830	72.9327584957607	1.9089695887444	0.437877357397288	4.35959877005557	1.3030113231391e-05	8.24204777705603e-05
LmxM.03.0830	314.663080904143	0.853716566484435	0.256145390468576	3.33293745760055	0.000859342574046	0.0032003505373101
LmxM.31.2390	1557.70593812536	0.75180528196931	0.11639754404461	6.45894454337605	1.0543573821441501e-10	2.10948436821687e-09
LmxM.33.1730	400.08525179587	1.0706477176225	0.151116544625502	7.08491396673866	1.39130709166444e-12	4.22166723791759e-11
LmxM.19.0850	1039.84970246421	1.86877527089918	0.237248069107474	7.87688295179598	3.3564906629726102e-15	1.58623119089792e-13
LmxM.00:ncRNA:rfamscan:422971-423050	21.0099157147702	1.62750053650972	0.461910565738039	3.52341049811084	0.0004260309590138	0.0017586609317124
LmxM.31.0640	1075.31448638351	0.697885117273183	0.233289056742921	2.99150387513563	0.0027760701484091	0.0086929264395917
LmxM.10.0350	737.209739338301	0.774869145175959	0.150887714368826	5.13540249726288	2.81540816292079e-07	2.74302148385044e-06
LmxM.25:ncRNA:rfamscan:230340-230444	180.388539572421	0.890306060420628	0.219260347049993	4.06049736032586	4.89682909256852e-05	0.0002628369819072
LmxM.30.0450h	1195.89937563647	1.17477947084831	0.133660984261853	8.7892474930965	1.5056504913690699e-18	1.30325936742399e-16
LmxM.29.2090	299.847160579754	1.75473495851109	0.299955794027106	5.84997854167979	4.91636434603356e-09	7.05536893847015e-08
LmxM.22.0630	1270.1065024227	0.719556415031877	0.145029304866536	4.9614553120423	6.99669685811807e-07	6.15993985699196e-06
LmxM.21.0901	509.535434396346	0.708114782400843	0.145499234397158	4.8667938723853	1.13423218242217e-06	9.39949112732201e-06
LmxM.30.1290	762.548199993583	0.637448091946057	0.110111406432001	5.78911951633012	7.075634018533291e-09	9.81162538522753e-08
LmxM.29.3650	23738.3004466749	0.642608311353209	0.253471575256899	2.53522830203707	0.0112374062633668	0.0283190903167837
LmxM.25.1190	14023.6023590881	0.752201687989912	0.221121885457023	3.40175142064854	0.0006695550912111	0.0025790773531468
LmxM.10.0640	1227.48168468286	0.61802414396624	0.139471006816392	4.43120156707439	9.37094398898108e-06	6.14491805593233e-05
LmxM.08_29.0730	1018.4568120401	0.61653337466096	0.114163917816285	5.40042236158277	6.64841801019652e-08	7.30881568153021e-07
LmxM.16.1260	4481.79559756213	0.648154856467649	0.135947949944504	4.76766921996423	1.86369441201865e-06	1.46372102674588e-05
LmxM.36.2530	1166.96536198097	0.711405539471298	0.142954020862677	4.97646400694584	6.4756310801985e-07	5.78794721439916e-06
LmxM.30.0450b	2266.93710692029	1.40054815415753	0.15533393230231	9.01636965857396	1.94425521129281e-19	1.90328697648342e-17
LmxM.30.1860	253.106119321353	0.84476691174383	0.313859041967882	2.69154874891346	0.007112110332545	0.0192504553207761
LmxM.29.2960	1005.84576445506	0.734454984127755	0.0915796235388466	8.01985153188811	1.0587305479465e-15	5.61673631984779e-14
LmxM.30.0451	164.432375863078	1.11306282495811	0.338459126585897	3.28861814478396	0.0010068051864098	0.0036800224656354
LmxM.04:ncRNA:rfamscan:119913-119998	124.19520216445	1.69124830250425	0.351155766058088	4.81623389383412	1.4629303532817e-06	1.17477307568705e-05
LmxM.23.0260	826.056953051603	0.78510580556229	0.166082511134012	4.72720336537295	2.27633254320134e-06	1.74928362707895e-05
LmxM.24.0650	1559.33440241465	1.19404520561759	0.12510336850838	9.54446886486204	1.36806812280899e-21	1.8442006842390702e-19
LmxM.25.0860	700.668772456529	0.867115111608969	0.152211435623394	5.69678032440619	1.22091073998755e-08	1.58853623653759e-07
LmxM.30.1700	966.474757550943	0.616967071863693	0.119083210142657	5.18097447259435	2.20729701899095e-07	2.18156290711089e-06
LmxM.28.1995	253.352639436327	0.681832936342936	0.192262512101043	3.54636444147053	0.0003905856362611	0.0016303480644545
LmxM.33.1460	968.359086904971	1.0580617935609	0.100027867144533	10.5776702409547	3.78246472228705e-26	7.77580185284161e-24
LmxM.26.2330	8929.59741633728	0.764033167895132	0.196461626035135	3.88896897228415	0.0001006709859783	0.000501403705451
LmxM.23.1267	1001.68880608174	1.44471076166676	0.129837798059523	11.1270429971744	9.26584519630426e-29	3.17471021038375e-26
LmxM.30.2240	323.911435718355	1.18077370505088	0.207393735718524	5.69339136960933	1.24540465171384e-08	1.61784556888513e-07
LmxM.28.0580	3047.40600106369	0.860710610719227	0.135242223724662	6.36421516161652	1.96290819697777e-10	3.6767640327444604e-09
LmxM.21.0020	527.077175882648	0.732477100252665	0.151650968657213	4.83001926554345	1.36519840754673e-06	1.1016709033618e-05
LmxM.08.1060	43.3338400540146	1.00022854149249	0.383988680062527	2.60483861485088	0.0091917544043374	0.0238209254544175
LmxM.33.1900	172.657341073091	1.23102444474256	0.214656872224248	5.73484758250146	9.76000750987602e-09	1.30286593756024e-07
LmxM.08_29.0160	2803.75125189176	0.981948413898991	0.17128181627294	5.73294022252918	9.870442800723021e-09	1.31334386974669e-07
LmxM.25.0840	375.999534129597	1.14658758999019	0.178865910033382	6.41031927087841	1.45215206423168e-10	2.8296318540704103e-09
LmxM.11.1130	1066.06248246568	0.88550177137527	0.215319741422829	4.11249691051962	3.91402710286864e-05	0.0002149969596986
LmxM.33.3745	449.697022207376	0.770410817541989	0.280789955958695	2.74372640898636	0.0060746142163259	0.0168357103811419
LmxM.32.2760	937.615864436026	0.686844230222921	0.110267849435467	6.22887118719845	4.69807859380244e-10	8.202186895294571e-09
LmxM.33.1990	680.114513738362	0.879918668945436	0.123689194311364	7.11394939424059	1.12768514010927e-12	3.4992282668371796e-11
LmxM.33.3900	1205.70435301194	0.664185117054276	0.127531725177294	5.20799915574675	1.90887793526294e-07	1.91190051908248e-06
LmxM.01.0450	274.9653590274	0.947543715950751	0.221550253770895	4.27687939789321	1.89531413185647e-05	0.0001143445935895
LmxM.05.0900	618.381729018559	1.41199093960457	0.249923130632126	5.64970091417007	1.60727232951338e-08	2.03332313316747e-07
LmxM.22.1300	346.421806666422	0.642643463676075	0.163853884138822	3.92205205908704	8.77980157590209e-05	0.000444011736523
LmxM.22.0790	2677.94117003251	0.819923489417814	0.121979465701321	6.72181571466692	1.7947385643770398e-11	4.26535699851805e-10
LmxM.18.1390	1187.55057265294	0.685918575809335	0.161623391571699	4.24393133406713	2.1963758499116e-05	0.0001295609656658
LmxM.29.2430	1674.81997123197	0.779447929366468	0.124270648399457	6.27218043363709	3.56026651147408e-10	6.36436337475029e-09
LmxM.10.0540	1538.47784151397	0.72298868929553	0.156521153521555	4.61911168573112	3.85386387869551e-06	2.78473837210134e-05
LmxM.21.0680	305.344058790445	1.09779335913134	0.164166290554615	6.68708146734987	2.2766515577129798e-11	5.288391457365501e-10
LmxM.20.0800	739.833433077609	0.787944859919339	0.168294073613209	4.68195250731334	2.84155323334763e-06	2.11075810639725e-05
LmxM.06.0060	771.815457045825	0.693187428593993	0.140982808160971	4.916822395838	8.79602846220373e-07	7.54985012874157e-06
LmxM.12.0270	916.294746832854	0.851765740448046	0.144729899939463	5.88520921250079	3.975507802142211e-09	5.7452725232013e-08
LmxM.36.4890	125.661353392464	1.24118927777818	0.335807080800384	3.69613789804505	0.0002189041032205	0.0009917622263264
LmxM.23.0700	652.086363640118	0.766016219102265	0.131790375901154	5.81238359678704	6.1589508926461e-09	8.68697310295521e-08
LmxM.03.0430	4805.12761784624	0.668522125275686	0.177762558630209	3.7607589046149	0.0001693986419048	0.0007910079684178
LmxM.23:ncRNA:rfamscan:218578-218718	278.340172303356	2.02324554071923	0.621364518288674	3.25613304456382	0.0011294081578722	0.0040449143215085
LmxM.08_29.1370	2293.90075790429	0.966433347937815	0.168887495051775	5.72234994450915	1.05060624963816e-08	1.38669906754007e-07
LmxM.22.1310	864.465214766203	0.668678218423624	0.177254944405185	3.77240939973499	0.0001616786825681	0.0007584049097307
LmxM.26.0310	1387.53804494546	0.629395934908332	0.07558446247008	8.32705445457759	8.287862720719281e-17	5.048229270553681e-15
LmxM.30.2420	472.91699426369	0.615005952718791	0.181433699144096	3.38970078667883	0.0006996894807661	0.0026823061073845
LmxM.36.1395	626.636688079972	0.886196097437275	0.182287162542779	4.86153871219157	1.16476795624336e-06	9.62601698913486e-06
LmxM.14.1100	764.035055521364	0.977010087496826	0.228919546813735	4.26791901825574	1.97304923473349e-05	0.0001179955189615
LmxM.36.1210	892.360469462913	1.11245667192009	0.197516821238289	5.63221230954299	1.77912471417602e-08	2.22674924271985e-07
LmxM.28.1600	668.157262985566	1.59307553180777	0.128159965653824	12.430367967723	1.7880937363368902e-35	1.22529123282485e-32
LmxM.34.3910	539.107287599479	1.12165836945194	0.172874650510634	6.48827555768766	8.682437546042239e-11	1.76285639360754e-09
LmxM.04.0200	629.7109829611	1.21166935466641	0.200167455924603	6.05327848660276	1.4192719194514402e-09	2.25308978961645e-08
LmxM.26.2650	628.890220412858	0.731640675872963	0.174737880250349	4.18707537727213	2.82572002440076e-05	0.0001620355352904
LmxM.36.2690	2278.1406148437	0.710698522954465	0.167655304028985	4.23904586300233	2.24471800493726e-05	0.0001319393577884
LmxM.04.0350	3032.38428304843	0.61610043671378	0.167380162553885	3.68084501361047	0.0002324622796781	0.0010485668270946
LmxM.05.0090	1773.92516764102	1.01939678124669	0.207731616914605	4.90727794058306	9.23491197924774e-07	7.87745655657201e-06
LmxM.34.0240	29170.2382389998	0.734871145241102	0.265475144400164	2.76813540077934	0.0056378027632825	0.0158332145227023
LmxM.30.0760	2133.73837564548	1.04850358775672	0.118920441552816	8.81684909731057	1.17725735011213e-18	1.02984970106085e-16
LmxM.10.0185	429.846971754507	0.88253095792723	0.31639345704375	2.78934642382695	0.005281453832579	0.0150274722717293
LmxM.14.1410	583.024465471175	0.731297948929171	0.298288639812494	2.45164532376717	0.0142204751506791	0.0346166273428166
LmxM.12.0890	64.2130840561124	0.953916650631342	0.379315678346211	2.51483580850216	0.0119087830431216	0.0297737680035235
LmxM.24.2050	19462.3992065685	0.602520863907718	0.256459265655471	2.34938231756909	0.0188045873920355	0.0436315243015542
LmxM.36.1160	768.141526245647	0.984130672716085	0.168790681942147	5.83047986649759	5.5268207330812104e-09	7.84923089604953e-08
LmxM.08_29.1350	34.2971551485769	1.1600643891883	0.495997249110245	2.33885246595481	0.0193430702985072	0.0446165686015778
LmxM.19.0780	1376.49512930372	0.756652876297225	0.16909488194985	4.47472370288318	7.65101852565373e-06	5.13586329277148e-05
LmxM.21.0915	49843.9246862046	1.17549605987273	0.247361391471192	4.75214039216638	2.01274534295537e-06	1.57028510010645e-05
LmxM.16.0910	1514.90678484756	1.12876759826848	0.0902264541468702	12.5103841100868	6.550669632489119e-36	4.89692330799618e-33
LmxM.13.1250	774.707381879569	0.610508092327293	0.142451196895434	4.28573508424388	1.8213592893771e-05	0.0001103687357151
LmxM.34.0790	1360.02064238399	0.650777112402532	0.142221564592296	4.57579772988789	4.74408745953663e-06	3.34855203259826e-05
LmxM.06.0840	2167.82411519531	0.751011178423714	0.124557402324823	6.02943835056237	1.64530463251226e-09	2.57211786941983e-08
LmxM.36.1200	1100.0778959246	0.966253067829125	0.149892339974327	6.44631385429449	1.14603216878967e-10	2.2653419528743903e-09
LmxM.31.0670	611.766290643825	0.61354628186324	0.106224327816592	5.77594882899702	7.6520628592892e-09	1.04523111116171e-07
LmxM.22.1210	1108.74063926556	0.6373899134986	0.138560670640819	4.60007815024842	4.22332466965729e-06	3.02775926404463e-05
LmxM.17.0860	500.601891040769	0.807321339826142	0.18217682369665	4.43152604949599	9.35685064297767e-06	6.14057325117361e-05
LmxM.26.0180	8269.62274984681	0.77608974929119	0.182319302295501	4.25676129471641	2.07409598771026e-05	0.0001234102120618
LmxM.30.0454	333.792605554759	0.937259688782079	0.152325254634	6.15301573618952	7.602325880491281e-10	1.28102306793606e-08
LmxM.33.1590	77.6468837714009	1.22212778463874	0.323515463192541	3.77764874846612	0.0001583159495895	0.0007447551793332
LmxM.36.6140	2296.01859000016	0.717597690547507	0.131745674758129	5.44684060304022	5.12723715595341e-08	5.75187873579876e-07
LmxM.30.2070	877.170203132938	0.710178126753743	0.142168134361079	4.99533970777186	5.87322894102124e-07	5.28976578116294e-06
LmxM.18.1050	1490.08009109874	0.680953296767268	0.0982381016991623	6.93166179913139	4.15925371275141e-12	1.1438643237443101e-10
LmxM.13.1440	2095.66825302152	0.796044779001371	0.0971421972566148	8.19463427308018	2.5135624014841697e-16	1.4060560290751201e-14
LmxM.09.1340	31265.0761894984	1.2822856563354	0.223556106857595	5.73585608713527	9.70210190546776e-09	1.29724201575059e-07
LmxM.26.2570	2607.14381509004	1.46175751858259	0.142585771689837	10.251776886703	1.16187687604269e-24	2.0769812068911e-22
LmxM.33.0070	760.369347948353	2.08903191854276	0.528926225473516	3.94957144859394	7.82912392183167e-05	0.0004016150094149
LmxM.24.0430	472.895721142639	0.741791782645789	0.13440483821863	5.51908541743976	3.40768534513711e-08	3.99734616163516e-07
LmxM.14.0330	1230.7846523091	0.871355975961643	0.116681642730319	7.46780689380221	8.15423873123701e-14	3.0203741030163e-12
LmxM.21.0260	610.998429670979	0.981153467961837	0.136214875516691	7.20298325891444	5.89092081731873e-13	1.9299219872833398e-11
LmxM.28.2350	1069.84214178894	0.735670790564456	0.131377558377192	5.59966861655554	2.1476194921829e-08	2.62015950804451e-07
LmxM.36.3670	482.431789821193	0.617465405492438	0.188891067794648	3.26889679168797	0.001079676759581	0.0038956480886506
LmxM.06.0800	1912.54362914056	0.690395539665307	0.147956344384864	4.66621112150114	3.06804470933493e-06	2.26264857801445e-05
LmxM.12.0990	547.841568873563	1.00429964303143	0.101937757516145	9.85208687637035	6.713529600855491e-23	1.0037337074151801e-20
LmxM.08_29.1330	936.998540407506	0.666310401139258	0.0990092291598751	6.72978071633437	1.69918968563599e-11	4.07359673031625e-10
LmxM.10.0070	17127.0899352397	0.613130330767967	0.256824424941864	2.38735210214822	0.0169702293719746	0.0400419501078185
LmxM.08_29.2840	513.076064502649	0.857243479020715	0.196713073167156	4.357836849472	1.31354239826929e-05	8.29589795773301e-05
LmxM.08.0760	137.645709512349	1.06572212618914	0.251793979831534	4.23251630917534	2.3109114948405e-05	0.0001354425950184
LmxM.08.0770	205.343110470648	0.997891476685361	0.230211135354357	4.33467944610644	1.45972673346614e-05	9.07281400551175e-05
LmxM.19.0820	52.4291651818435	1.31188711500208	0.373371746500554	3.51362181873109	0.0004420416699765	0.0018138266727628
LmxM.14.0300	673.191362849678	0.725901697584329	0.158740210763026	4.57289110361575	4.81040177872712e-06	3.38663817007475e-05
LmxM.09.1520	1673.52793915521	0.677357537468375	0.147943153915665	4.57849869723949	4.68325081142964e-06	3.30845115312594e-05
LmxM.25.0690	3145.57003894677	0.80403392772948	0.113670267917091	7.07338816440483	1.5119578288160498e-12	4.53752891472787e-11
LmxM.31.2240	1147.96530051522	0.772329947957255	0.0927207275427838	8.32963640843825	8.10910134386017e-17	4.9762045037733e-15
LmxM.33.1810	45.7654364846262	0.8476902496867	0.341204178373745	2.48440758764146	0.012976718462841	0.032025076806705
LmxM.14.0470	108.42084475071	1.28378055147885	0.301820891846372	4.25345158721583	2.10500464528155e-05	0.0001249780014306
LmxM.34.3670	764.763743221084	0.981302146421308	0.105512233433463	9.30036370654716	1.3996607062987202e-20	1.69256029233741e-18
LmxM.33.1150	1192.62804502367	1.05016085952946	0.150654012881953	6.9706796350146	3.15413492848416e-12	8.94360397135352e-11
LmxM.31.0790	638.706413805989	0.718369985229909	0.151744964279369	4.73406144738588	2.20071052914263e-06	1.69601149776381e-05
LmxM.19.0870	476.633537499058	1.73511117096218	0.299615883507988	5.79111878398102	6.9919104137977906e-09	9.72833829655824e-08
LmxM.27.0540	273.178949399294	0.764386045041049	0.243996845562954	3.13277019330903	0.0017316496401235	0.0058334104837099
LmxM.29.1930	466.858764125725	0.954328628567515	0.207403917862643	4.60130473137705	4.19852648796301e-06	3.01260761871901e-05
LmxM.30:ncRNA:rfamscan:844974-845056	53.0935246274932	1.22156170238145	0.406117201847734	3.00790436067135	0.0026305590873217	0.0082909495496536
LmxM.36.5410	2783.15032123675	0.84455830883658	0.185926554187477	4.54242973806194	5.5609533877131e-06	3.85562560768675e-05
LmxM.04.0190	1540.91103780273	2.22507342233316	0.240600861900691	9.24798608265821	2.2876212311026902e-20	2.61265408102186e-18
LmxM.08_29.0080	478.629840865777	0.753304395364948	0.262869179814628	2.86570071050615	0.0041608741529173	0.0123147951712706
LmxM.04:ncRNA:rfamscan:58404-58479	209.597788029897	1.41226553706092	0.233877825316943	6.03847558077415	1.55576965322235e-09	2.43677978256141e-08
LmxM.32.1400	3357.66536613953	0.640082275372029	0.109457318117195	5.84777963120475	4.98177923483389e-09	7.1243775040068e-08
LmxM.36.5860	1921.6531001428	0.993663103617952	0.0895820859562038	11.0922076999161	1.36867596072058e-28	4.3287009326943697e-26
LmxM.21.0350	582.606425632782	0.926204796557466	0.19642097794803	4.71540670570597	2.41228407605725e-06	1.83329130844906e-05
LmxM.03.0400	470.901249863843	1.11629747706871	0.395823935171367	2.82018690099025	0.0047995685728194	0.0138821147992593
LmxM.18.0970	2281.80051790727	0.623821476790198	0.12912207841933	4.83125337221036	1.35676210300882e-06	1.09593858281351e-05
LmxM.36.6000	1861.6817729101	0.703094472822026	0.110811146412096	6.34497968469061	2.22454799623271e-10	4.11066475798238e-09
LmxM.34.0520b	463.620451013529	0.994583810577156	0.200133997333963	4.96958949417024	6.70947976689339e-07	5.97917340665061e-06
LmxM.29.2380	500.528559733054	0.787698792114473	0.177633231642065	4.43441120128752	9.23242630923773e-06	6.07181839951891e-05
LmxM.33.2770	1068.87941464532	0.654951936611535	0.261671550346488	2.50295431713647	0.0123161440115304	0.0306338935894782
LmxM.30.2930	1290.52342999165	0.767522321934273	0.176207239937813	4.3557933386003	1.32585825630831e-05	8.348034028808e-05
LmxM.24.1890	232.205635165832	0.977603388783536	0.263705626566676	3.70717683013243	0.0002095826074687	0.0009553202778356
LmxM.33:ncRNA:rfamscan:381969-382046	57.825928776397	1.11827250039261	0.414422975632507	2.69838441916948	0.00696769286251	0.0189020287675258
LmxM.31.3360	1688.97965840984	0.94827406857204	0.112348566439357	8.44046433902557	3.1607947822485503e-17	2.0960657656798203e-15
LmxM.15.0340	1169.21821691755	0.631033171884065	0.116114061414705	5.43459736224635	5.49203031608203e-08	6.14434901893096e-07
LmxM.16.1140	1346.19486218423	1.45371978638346	0.198211561646664	7.33418259917093	2.23078777288312e-13	7.70746548588989e-12
LmxM.11.1230	202.097403329757	0.706995019676563	0.220115349945107	3.21192965348793	0.0013184665548066	0.0046213770162725
LmxM.08_29.2600	2477.45568665617	0.88228121248225	0.123393598467086	7.15013763633442	8.66909345114869e-13	2.7630215290230897e-11
LmxM.34.0490	7459.36459944938	1.21504171295937	0.133626046063164	9.09285089813277	9.647550519479661e-20	9.79405036070139e-18
LmxM.36.5550	1559.89505500169	0.605395807362884	0.1045972988823	5.78787228572812	7.12835743901039e-09	9.86809481834721e-08
LmxM.04.0340	834.885319917297	0.868260791553047	0.17493211330792	4.96341566527988	6.92641246486583e-07	6.12309985817421e-06
LmxM.20.0820	294.781552858469	0.807802506206175	0.22272564670768	3.62689487334339	0.0002868500114314	0.0012546636404258
LmxM.16.1270	4606.27334606801	0.607721842392477	0.0889362066653355	6.8332332261406	8.30218138992124e-12	2.16040625219375e-10
LmxM.30.0060	708.050093375683	0.674232307448915	0.221722334352964	3.04088584226969	0.0023588324619996	0.0075886851858463
LmxM.22.0030	13149.2589441872	0.6921854394508	0.212859712132048	3.25183865240502	0.0011466109097775	0.004094043209336
LmxM.28.2690	199.946187382637	1.25876793173651	0.25144434163037	5.0061493671905	5.55296728385701e-07	5.03996136591128e-06
LmxM.36.3860	554.714780644091	1.39862756799013	0.177011652855759	7.90133047980647	2.7594195124640203e-15	1.31160154051975e-13
LmxM.33.3410	238.262310936548	0.777811762540623	0.180233266904598	4.31558377595374	1.591816667679e-05	9.81222523112772e-05
LmxM.34:ncRNA:rfamscan:1488157-1488289	403.019084525065	0.967093069651198	0.314693531752231	3.0731266202593	0.0021182858643765	0.0069259104026911
LmxM.27.1570	7218.15560214273	0.629394327021854	0.208625920471701	3.01685584225968	0.0025541124454504	0.0081090604783547
LmxM.13.0300	268.084922952928	3.5512085697361	1.49679698963611	2.37253855688168	0.0176663191675485	0.041422909185843
LmxM.18.1350	116.460027112135	2.34151252011058	0.327870045528873	7.14158719907941	9.2259317734784e-13	2.91787834512742e-11
LmxM.11.0010	384.884244171349	1.06297628147097	0.266166826665997	3.99364674698871	6.50647783813418e-05	0.0003390542919073
LmxM.33.1380	1684.78596414426	1.00051178494688	0.148166004189146	6.75264066424877	1.4517819378855199e-11	3.53195351338242e-10
LmxM.34.2810b	489.443170660384	0.803637674576406	0.145378425457118	5.52790190187781	3.24083169888474e-08	3.81795975070619e-07
LmxM.24.0480	1687.55049409448	1.23695272345816	0.149616930784486	8.26746489834038	1.36837511943762e-16	7.868635389605311e-15
LmxM.36.4100	658.091671138558	0.966342715302274	0.23373382398595	4.13437259025189	3.55925642484432e-05	0.0001981568421225
LmxM.33.0510	1516.9936354305	0.631397210445348	0.111375823507398	5.66906883883476	1.43575675981904e-08	1.83897629844112e-07
LmxM.22.0350	1012.35449305552	0.655791399737809	0.172193089298989	3.80846526656548	0.0001398319830364	0.0006685106956447
LmxM.15.1280	2735.93755479634	0.693837754340742	0.10642214818836	6.51967439252115	7.0460176025833e-11	1.4631162309606702e-09
LmxM.31.3280	1214.88325804707	1.06350260187093	0.211636116991023	5.025147016452	5.03047020708185e-07	4.60640941122874e-06
LmxM.30.0400	1623.37800391653	0.761677674791119	0.0979677945518494	7.77477617287793	7.55809252210757e-15	3.30586142602609e-13
LmxM.28.1120	709.5360808931	1.03311756898744	0.186959423418012	5.52589192938165	3.27815883774375e-08	3.85640917350027e-07
LmxM.27.1240	25172.9058271298	0.647475186063057	0.224243204534379	2.88737929609721	0.0038846562370589	0.0116369866074083
LmxM.24.1470	2652.62897663536	0.624846444636665	0.180829916856441	3.45543732751216	0.0005494009007085	0.002182475172235
LmxM.28.0990	1430.98622529439	0.83163335024195	0.140288353145529	5.92802846134526	3.0659336734763303e-09	4.53438356061076e-08
LmxM.31.2630	747.937870882077	0.81012320754432	0.119918342494063	6.75562379111791	1.4222201618922199e-11	3.48062987834515e-10
LmxM.36.4830	774.555497589955	0.698849960093236	0.164468587603227	4.2491394270326	2.14593326541979e-05	0.0001271326314232
LmxM.07.0810	1015.23905900694	0.741695128622155	0.181270677892458	4.09164425954306	4.28325364333197e-05	0.0002332529450935
LmxM.01.0410	5259.45643196714	0.633058978202969	0.143482242903497	4.41210679030679	1.02369596608955e-05	6.67024717048683e-05
LmxM.30.2460	4608.67783945372	1.23887157255139	0.16731867401997	7.40426362931566	1.31880201976703e-13	4.77731674385211e-12
LmxM.20.0910	1205.55108766552	0.690098163729748	0.144614163802315	4.77199567169023	1.82409425306486e-06	1.4356857210343e-05
LmxM.33.1830	432.028799260542	0.806848966957936	0.150043487108952	5.37743411929673	7.55548455648961e-08	8.20723243170595e-07
LmxM.21.1730	343.862790522442	0.823301181991572	0.238195880162704	3.45640395387695	0.0005474342590014	0.0021778190187561
LmxM.27.0900	168.520682960494	0.931235501822045	0.370338267341486	2.51455381186239	0.0119183112717386	0.0297817301371173
LmxM.25.2030	1731.95070149916	0.6279316343595	0.111065302643563	5.6537156016645	1.57015935727979e-08	1.99250314736292e-07
LmxM.36.5450	1285.79993755379	0.839578174007028	0.15793075434838	5.31611577156782	1.0600571819291e-07	1.11611398297093e-06
LmxM.33.4250	1237.29813756883	0.675428192090884	0.133545759974375	5.05765358795732	4.24446552020018e-07	3.97973089767458e-06
LmxM.19.1005	949.588735414537	1.3827142772187	0.517763691088298	2.67055087295199	0.0075726895411797	0.0203165501132533
LmxM.21.0210	1241.58716289381	0.729294194916361	0.122162622414041	5.96986361707748	2.3745199277266104e-09	3.62257465040741e-08
LmxM.30.0452c	148.794219871902	1.27500907723736	0.25251957356611	5.04914949455814	4.4378136392244e-07	4.13743101534492e-06
LmxM.31.0040	384.321267237515	0.836591700018169	0.260744856336526	3.2084686607909	0.0013344385152248	0.0046634457759006
LmxM.17.0320	425.921743316956	0.712680692349168	0.210938456264195	3.37861907672518	0.0007285087485907	0.0027759626689814
LmxM.03.0490	1314.14407751817	0.923813809068688	0.153795064608586	6.00678449220608	1.89238781783443e-09	2.93052825349388e-08
LmxM.03.0380	267.286466721291	0.799139965031282	0.329933333986412	2.42212557117431	0.0154300176854481	0.0370006444932016
LmxM.19.0600	1561.75234383726	0.892799716202536	0.103298798671121	8.64288576138239	5.48107168187412e-18	4.17322707778249e-16
LmxM.15.0630	3236.94099676338	1.05449440268083	0.147909517247555	7.12932083278949	1.00865378041611e-12	3.1536730176280196e-11
LmxM.25.1700	858.869301132157	0.740613733214036	0.258368342339576	2.86650340559386	0.004150336938063	0.0122897055142561
LmxM.03.0680	246.902140820202	0.834334615457646	0.19079640341769	4.37290536148696	1.2260388137023e-05	7.84569429188641e-05
LmxM.34.1830a	110.76340318171	1.14677423399493	0.267594091970804	4.28549907641478	1.82329405650647e-05	0.0001104046172802
LmxM.26.1090	1002.01205989623	0.866231281823697	0.124468142544836	6.95946178767522	3.41575147983555e-12	9.5536477614584e-11
LmxM.20.1150	742.325954270601	0.682029736722455	0.147450416367323	4.62548532262811	3.73722272096919e-06	2.70520972134944e-05
LmxM.30.0450	1510.10981453498	0.686170774234131	0.0907590079174207	7.56036001251204	4.01955270653903e-14	1.57394199551764e-12
LmxM.01.0700	277.464599985459	0.875853119530543	0.243978272341577	3.5898816362808	0.0003308281495606	0.0014145583522664
LmxM.36.3900	1382.26509988736	0.613985315541947	0.157067175920383	3.90906191535	9.26552166540391e-05	0.0004651427634591
LmxM.08_29.2850	491.551850726271	1.12046068069236	0.284337179904879	3.9406055904022	8.12761648187475e-05	0.0004156305368809
LmxM.19:ncRNA:rfamscan:223097-223160	520.935750426548	0.904335162114427	0.258565399787227	3.49751035079946	0.0004696224883952	0.0019113259909522
LmxM.32.2580	1494.22690440151	0.938637985991349	0.18546589043324	5.06097365827609	4.17120847747348e-07	3.91550768382014e-06
LmxM.29.2180	146.971999236109	1.17400613423891	0.452436824663006	2.59485097198566	0.0094631941012602	0.024414027098636
LmxM.19.0030	19133.154762972	0.758501676666663	0.156152735773927	4.85743444011636	1.18916491752292e-06	9.81777421364554e-06
LmxM.31.2510	1848.49528052887	0.645003204694747	0.108273209007089	5.9571819345681	2.5662450641636304e-09	3.87908697842234e-08
LmxM.20.1210	921.682148040691	0.623059975847909	0.116524187474766	5.34704415753026	8.94022108231203e-08	9.52272512433314e-07
LmxM.19.1360	288.838196895413	1.47777116190275	0.350052962454344	4.2215645071008	2.42612501670552e-05	0.000141489546187
LmxM.20.1540	345.498061544948	0.874515451192064	0.216638798114493	4.03674438190837	5.41980654615042e-05	0.0002873440956092
LmxM.19.1630	444.568870626469	0.612731768024126	0.193681775819168	3.16360052685704	0.0015583052460488	0.0053324777520847
LmxM.21.1510	2186.3391604006	0.733306503562909	0.127695997005519	5.74259585859389	9.32360663936937e-09	1.2486647784289e-07
LmxM.33.1570	126.66080248394	1.25771152337481	0.282470196805171	4.45254592378218	8.485808333293e-06	5.63186456212013e-05
LmxM.12.0980	13.4528844124644	1.71780505933877	0.628495126302199	2.73320346880907	0.0062721572503188	0.0173015595670485
LmxM.08.0810	573.497457700903	0.786738111240974	0.214421408022114	3.66912109428847	0.0002433857800188	0.0010906600921496
LmxM.18.0440	840.416312866455	0.708774640772543	0.14561176964687	4.86756422569019	1.12982119845308e-06	9.39949112732201e-06
LmxM.28.2250	1627.19130452978	1.37819859482621	0.148662477337393	9.27065537659755	1.8500562110979902e-20	2.20478438026938e-18
LmxM.34.5160	620.135668908102	0.624339623379706	0.162108879868794	3.85135980141882	0.000117463770067	0.0005759717240676
LmxM.09.0180	458.579019544446	1.81280662286482	0.29881313656078	6.06668985081949	1.3057335822502202e-09	2.08891969782949e-08
LmxM.11.1270	242.518309641732	1.20463798867516	0.521128280657543	2.3115958841366	0.020799963670189	0.0472611498369616
LmxM.33.4570	666.394725660293	0.992188742269127	0.204450214016939	4.85296015482244	1.21632135873269e-06	1.00118223552141e-05
LmxM.33.1840	106.28622866682	1.46017020103273	0.253535366491039	5.75923675360038	8.449512080413471e-09	1.14465136469918e-07
LmxM.08_29.1740	19571.3597175201	1.03964679524257	0.206259905999164	5.04046964535503	4.64390785175319e-07	4.30845941548588e-06
LmxM.05.0840	3681.0445108119	0.767520903687733	0.183058074755006	4.19277272917317	2.75565482661092e-05	0.0001584188975831
LmxM.04.0100	2283.96141300817	0.789547452905789	0.0852961387966644	9.25654389570874	2.11156391149417e-20	2.48048429203093e-18
LmxM.33.0770	1051.0506026794	0.744648325696033	0.167144424908893	4.45511913485552	8.38466214628767e-06	5.58275925740272e-05
LmxM.19.0750	1264.20916256295	0.702161965901707	0.118120276045176	5.9444660088092	2.7735951396362704e-09	4.16951971357021e-08
LmxM.18.0200	687.766188492192	0.605237370836914	0.261101576677339	2.31801499837302	0.0204485059456768	0.0466818612968629
LmxM.30.1970	1148.79666673157	0.606201479679831	0.166702623900211	3.63642434352267	0.0002764487882652	0.0012175888515826
LmxM.09.0150	373.433612074542	2.2125424981542	0.420925266557099	5.25637844516056	1.4691980551841e-07	1.50077212518992e-06
LmxM.17.0020	770.451242663633	0.77226621277351	0.112250351928478	6.87985560406591	5.99132589353803e-12	1.59956729943387e-10
LmxM.03.0070	1687.37253107845	0.965298713868297	0.136906183409202	7.05080435251847	1.7788646769508998e-12	5.22414437091689e-11
LmxM.34.4210	618.81200901213	0.776161472442199	0.187954765956352	4.1295120583558	3.63533936961966e-05	0.0002017098221078
LmxM.34.3600	1485.02760854306	0.648022718347331	0.105991499405403	6.11391217203874	9.72178241566895e-10	1.60849530792849e-08
LmxM.30:ncRNA:rfamscan:446208-446455	442.075578238263	0.861817653234706	0.185215516828998	4.653053199805	3.2705582322298e-06	2.3905600305445e-05
LmxM.30.0900	14565.9742723916	1.06768222725692	0.154663821295497	6.90324484623349	5.0827910770936796e-12	1.37486154693886e-10
LmxM.19.0010	1510.01401789939	0.629372619460814	0.110294352420358	5.70629960328456	1.15458696241083e-08	1.51422146601344e-07
LmxM.32.1020	1217.8166142353	0.661755392736511	0.119619144829878	5.5321862873845	3.16263751203917e-08	3.73118626420346e-07
LmxM.30.1855	462.947838814669	0.721877543732582	0.187646520233774	3.84700735634881	0.000119569380658	0.0005850907378626
LmxM.18.1030	1044.58562998921	0.922505860126083	0.117175192869024	7.87287682263297	3.4657784556503803e-15	1.61926683186438e-13
LmxM.14.0700	168.070440195044	1.00089324502924	0.41337489455885	2.42127245317446	0.0154662805286989	0.0370568836793388
LmxM.15.0650	800.936492508485	1.10823487009912	0.276681452413742	4.00545414385745	6.18984415592691e-05	0.0003237855502174
LmxM.08.0540	1700.99209228869	0.771636662963425	0.121293505481742	6.36173107454281	1.99492502039853e-10	3.7282428278948e-09
LmxM.17.0025	621.73991459274	0.613408000577008	0.168445073286812	3.6415906301549	0.0002709587019703	0.0011959706958143
LmxM.23.0800	1148.44326868428	0.984316917079534	0.199156773531932	4.94242249270881	7.71577833525911e-07	6.73533389074689e-06
LmxM.06:ncRNA:rfamscan:100521-100638	573.289235093533	1.56041470066459	0.213526859824949	7.30781458568646	2.71522096292545e-13	9.264424057317849e-12
LmxM.19.0880	113.133530360044	0.885275490222944	0.296532604469095	2.98542378436908	0.0028318569737261	0.0088423642477416
LmxM.28.2470	974.802566703964	0.760344605374056	0.219624073717556	3.46202760245621	0.0005361221681179	0.002139026001181
LmxM.07.0880	2320.67932295553	0.654944715662286	0.119887964774178	5.46297300897504	4.68225814928558e-08	5.32534007767293e-07
LmxM.21.0015	28.4766010771782	1.30006389924836	0.498115811002179	2.60996312611059	0.0090551982690158	0.0235114920638198
LmxM.33.1900a	139.354171909206	1.57169325926417	0.246536153791895	6.37510253603962	1.82840581639432e-10	3.4404990911236903e-09
LmxM.04:ncRNA:rfamscan:50220-50294	491.366796702746	3.65548880410052	0.34237287810875	10.6769228459137	1.30526752385619e-26	2.90086887801876e-24
LmxM.30.0453	339.077327826644	1.19559921713483	0.197773348738876	6.04529995956837	1.4913228076878801e-09	2.34477006646605e-08
LmxM.29.0850	2375.08875703203	0.82716792635987	0.168554177149216	4.90743059798276	9.22772922957482e-07	7.87745655657201e-06
LmxM.08_29.0280	584.372208548025	0.601094222580885	0.195020024474049	3.08221796301165	0.0020546433093958	0.0067554306010242
LmxM.31.1780	1012.09083994843	1.12425669516746	0.170531724404834	6.5926542353992	4.32031969138315e-11	9.4233392101442e-10
LmxM.13.0790	1499.04586026662	0.677012550835048	0.120599491745107	5.61372640164975	1.98015223586179e-08	2.44119817623561e-07
LmxM.14.0070	626.143837300745	0.620367654122424	0.132740819768671	4.67352586192812	2.96072403841842e-06	2.19333637548781e-05
LmxM.08.0370	1019.07429120705	0.661042393982078	0.108042090045576	6.1183784366188	9.45323552452161e-10	1.57038294380083e-08
LmxM.33.1610	57.89301843597	0.945340050626962	0.397785571477392	2.37650663676897	0.0174774469837458	0.0410268474300148
LmxM.29.1740	842.095057301029	0.739443445520628	0.111755992401906	6.61658878086271	3.6758215322993894e-11	8.12534420970374e-10
LmxM.33.1740	71.7363809539373	1.35657677635849	0.305928253927895	4.43429712339753	9.2373158431207e-06	6.07181839951891e-05
LmxM.09.0350	1359.99930818819	0.626716518205884	0.098299468577045	6.37558399122654	1.82267064879671e-10	3.4375735653796604e-09
LmxM.33.3650	17126.9347286594	0.608647843451449	0.196547899485683	3.09668963669482	0.0019569464613917	0.0064696292319305
LmxM.09.0690	54.1050349231294	0.972049534088883	0.363712547507671	2.67257629892018	0.0075271254919433	0.0202074936076558
LmxM.07.0110	1153.41321821195	0.615602802360326	0.141336474676604	4.35558339606889	1.32712976243331e-05	8.34964654666344e-05
LmxM.24.1280	2851.29169285201	0.764877879239932	0.222394605831892	3.43928251487404	0.0005832582153853	0.00229370268059
LmxM.03.0020	1282.11086009083	0.858363816844293	0.134747978853368	6.37014242550056	1.88852743980281e-10	3.5455162414380102e-09
LmxM.30.0452	150.579585580977	1.08313364705847	0.224463999638612	4.82542255685689	1.39706744069434e-06	1.12407882239037e-05
LmxM.34.0440	2519.17220958356	1.50216067639379	0.183285505935972	8.19574176759265	2.4905249678965897e-16	1.4027114254119e-14
LmxM.30.3105	1282.6553636547	0.701256027216998	0.222064916974948	3.15788750771519	0.0015891686891226	0.005416219491711
LmxM.08_29.2270	370.199039663255	0.731719361213793	0.239832735280714	3.05095699449597	0.0022811324519281	0.0073921522112179
LmxM.31.3100	632.638286226431	0.633108162388622	0.207957949105389	3.04440472274409	0.0023314126471649	0.0075181200775047
LmxM.26.0400	1084.53675805764	1.01479258024039	0.146068632835052	6.9473682374117	3.72163378286397e-12	1.03738964733866e-10
LmxM.32.0400	1298.59320631586	0.67825211415463	0.146988949223723	4.61430684236202	3.9440937893747e-06	2.84015685399113e-05
LmxM.04.0390	480.555950955249	1.2361120716599	0.259037086258301	4.77195018487547	1.82450635836172e-06	1.4356857210343e-05
LmxM.36.4860	596.281014409471	0.750988625033579	0.151497611846756	4.95709876795436	7.15536068695478e-07	6.27276449134639e-06
LmxM.33.3280	1121.39394819829	0.834430941185091	0.128589353631682	6.4891137377916	8.634276791067529e-11	1.7574172785383202e-09
LmxM.08.0750	115.083413443377	0.921538791931401	0.2771182785121	3.32543488967713	0.0008828071678377	0.0032773468808714
LmxM.34.0780	1307.74579982217	0.632886883797863	0.0932086524506021	6.79000143396853	1.1213243031656799e-11	2.8197705641992005e-10
LmxM.30.2260	1878.89566820701	0.616245620104632	0.100618820676146	6.12455618107567	9.09367238327238e-10	1.51370987869734e-08
LmxM.20.1700	3422.94056766187	0.621446624521121	0.0881144493623368	7.05272096708748	1.75452472044277e-12	5.17113146100392e-11
LmxM.26.2040	904.739256301028	1.08898283010711	0.200418644932935	5.43354052948272	5.52467279717842e-08	6.17247070804322e-07
LmxM.23:ncRNA:rfamscan:475576-475666	1354.16980115928	0.888864453277034	0.221597912706619	4.01115896093224	6.04214097099901e-05	0.0003168440948686
LmxM.31.3620	750.64671965737	1.09020858564348	0.210391621304774	5.18180609514008	2.19747599106021e-07	2.17446992472781e-06
LmxM.22.1130	791.233952994071	0.66827667896696	0.134491994574621	4.96889559174601	6.73353121292595e-07	5.99240553721754e-06
LmxM.34.1550	839.344202280472	0.609557232339331	0.0869004355622557	7.01443241792088	2.30884294329589e-12	6.7086980645661e-11
LmxM.33.1580	75.5669608021455	1.65686774143833	0.373538752663598	4.43559799250729	9.18170527886339e-06	6.04977263686648e-05
LmxM.24.1650	401.227358500323	0.618829596203119	0.18753745656221	3.29976532446915	0.0009676570874603	0.0035490830643115
LmxM.29.0390	248.159108123749	1.43896163825987	0.386493060466625	3.72312412678916	0.0001967727195226	0.0009039452919747
LmxM.24:tRNA:rfamscan:206541-206612	132.048953760251	0.897105245655322	0.376009194585442	2.38585986346531	0.0170392425703824	0.0401586963761119
LmxM.23.1155	749.683189315736	1.53309681485935	0.179058679229287	8.56197991327858	1.10945532603601e-17	8.142037608862901e-16
LmxM.21:ncRNA:rfamscan:373780-373898	199.38219092096	0.912791589814606	0.393282195863585	2.32095833326566	0.020289092746764	0.0463565461674466
LmxM.03.0720	1071.6113989582	0.686871267213959	0.125570970399845	5.46998454361556	4.50074827681045e-08	5.15454778275938e-07
LmxM.28.2480	2366.53088149728	1.0072025770447	0.0915837532982805	10.9976119210176	3.9238581014820297e-28	1.1523530417316702e-25
LmxM.36.0660	261.280555442367	1.14312533542083	0.206458201203087	5.53683665148458	3.07983544661577e-08	3.65019351674226e-07
LmxM.17.1440	1372.16274971834	0.613913438519286	0.106517587214813	5.76349365932608	8.239034990315531e-09	1.11797994596311e-07
LmxM.06.0410	1334.2854364356	0.684396463992555	0.227466550073265	3.00877849412196	0.0026230027780059	0.0082721752868808
LmxM.14.1280	920.140332170707	0.653316848073173	0.109471740984306	5.96790406545955	2.40320590911058e-09	3.65278413874608e-08
LmxM.36.3140	440.289081292427	0.721260934514768	0.206943532059021	3.48530310340437	0.0004915798565138	0.0019883232464897
LmxM.08_29.1890	649.920000740466	0.940384721642866	0.137780718167001	6.82522731884038	8.778619707820389e-12	2.26290250336699e-10
LmxM.27.2340	415.634633519704	0.601898501878728	0.137146802419998	4.38871698980975	1.14021333095476e-05	7.34794217902899e-05
LmxM.05.1215	678.766588531234	1.66954547794698	0.618022625397877	2.70143099837509	0.0069041804772709	0.0187679590296195
LmxM.33.1200	973.335476321487	0.610204656140194	0.181783075569479	3.35677374930853	0.0007885761342934	0.0029677169575719
LmxM.30.0450a	199.329703084384	0.620124404253919	0.206890429297462	2.99735665085947	0.0027233190271404	0.008547271893197
LmxM.20:ncRNA:rfamscan:3227793-3227904	217.794396920606	0.866887758364284	0.247074715641389	3.50860571108583	0.000450462177739	0.0018428609390786
LmxM.28.0020	507.500357453441	1.24418466826635	0.189097512958168	6.57959297720423	4.71737844088411e-11	1.0181365595640402e-09
LmxM.11.0675	212.195412981428	0.877832637534995	0.242872758852934	3.61437256973948	0.0003010758525869	0.0013071524476361
LmxM.33.2870	6910.21073988853	1.05030242847195	0.212572328546116	4.94091792499746	7.77556364072479e-07	6.77314192983898e-06
LmxM.23.1640	1178.88682287988	0.654855015824307	0.115579091490717	5.66586055815208	1.46288458239239e-08	1.86790371444295e-07
LmxM.09.1330	1054.07352558505	0.736088047084436	0.131654942444712	5.59103998236566	2.25713594287142e-08	2.74156999383038e-07
LmxM.04.0210	719.248784479775	1.55922074267019	0.295409005191523	5.27817607205069	1.3047606569069e-07	1.35126535034577e-06
LmxM.13:ncRNA:rfamscan:178177-178280	129.93088246572	0.720801732159292	0.246171477482918	2.92804730884921	0.0034109814020233	0.0103768035770765
LmxM.03.0940	846.531828454071	0.6425059853973	0.181993791064423	3.53037310580481	0.0004149740198071	0.0017216606280899
LmxM.31.2250	332.680083456183	1.30102990203821	0.195883313159394	6.64186183628384	3.09745253566679e-11	7.01662595063031e-10
LmxM.10.0330	1420.22542620359	1.17587741956366	0.179205960113411	6.5615977215239	5.3234270253273e-11	1.128209804878e-09
LmxM.31.3900	25702.4543138121	0.81008476522274	0.222293066825008	3.64421966367691	0.0002682042877328	0.0011863603324514
LmxM.30.1960	330.154694487907	0.992453323725788	0.220484604224491	4.50123638889226	6.7559317674298e-06	4.59884328837544e-05
LmxM.09.0680	924.270047402688	0.700987561869819	0.179178286646914	3.91223498665981	9.14458651665757e-05	0.0004599139750854
LmxM.32.2835	3845.67420987547	0.669298072999554	0.0883634597379346	7.57437604847678	3.60857741317708e-14	1.42660250329592e-12
LmxM.08_29.0251	473.343898524565	1.93163659721941	0.292643238677691	6.60065343025698	4.09349486744239e-11	8.95234263164329e-10
LmxM.00:ncRNA:rfamscan:423026-423143	68.2213564596661	1.67634669815561	0.414683326850708	4.04247431621266	5.28901075158584e-05	0.0002805905510341
LmxM.16.1570	1242.99092857503	0.638024563116235	0.0971720644224876	6.56592578235461	5.1710568469014096e-11	1.1044571545992301e-09
LmxM.21.0920	6879.80606188382	0.685982984808748	0.25691692179334	2.67005762026272	0.0075838231451732	0.0203397839930723
LmxM.12.0075	188.492167719969	0.784727077208519	0.280143652568298	2.80115958371467	0.0050919331767203	0.0145841053682242
LmxM.34.0940	912.023281089791	0.643220404220698	0.123220790062979	5.22006395099353	1.78861357541398e-07	1.80463428596676e-06
LmxM.25.0870	1130.16102995807	0.684136154389267	0.163049440745643	4.19588163725455	2.71812176829228e-05	0.0001569072367259
LmxM.17.0150	958.965400947961	0.724584806284161	0.112784663296088	6.4244976675769	1.32305689911285e-10	2.5903564003345203e-09
LmxM.30.0460b	90.4509517200682	0.956945232286611	0.286342112665158	3.3419646987296	0.0008318763976211	0.0031065030052855
LmxM.33.1980	147.194484720143	1.24560343680294	0.224824510052287	5.54033648961697	3.01891001665264e-08	3.59254660881833e-07
LmxM.30.2720	407.93179179744	0.7842844102391	0.217758691289391	3.60162161884424	0.0003162384192351	0.0013629080300684
LmxM.29.3470	477.713726470056	0.710584938807778	0.255270291231227	2.78365702244654	0.0053749838250901	0.0152513774995571
LmxM.31.2620	1657.42154568693	0.740735547550331	0.160923247068928	4.60303629862163	4.16375624540824e-06	2.99026791318707e-05
LmxM.21.0230	1528.85186367271	0.678496510770418	0.123429113226488	5.49705408257613	3.86188289072931e-08	4.51083281398681e-07
LmxM.34.1470	2150.67668747733	0.847267655165504	0.170700906147613	4.96346313728898	6.92471891992249e-07	6.12309985817421e-06
LmxM.20.1175	109.049595887742	0.969334724846481	0.346993336093367	2.79352547734709	0.0052136921876368	0.0148655308110048
LmxM.03.0390	1359.37555565136	1.25413479372787	0.175508313649579	7.14572869882324	8.95197121591639e-13	2.8421644520648796e-11
LmxM.33.1720	66.0016371397894	0.91181392399708	0.323410649065821	2.81936889410066	0.0048118183274235	0.0139053128623992
LmxM.29.1940	768.280527198437	1.03675978904381	0.12260960985873	8.45577920228567	2.7722975970632402e-17	1.88401678848355e-15
LmxM.36.4110	1707.4254215993	0.662013081288229	0.108336294028364	6.11072297816378	9.91807966685673e-10	1.63767809438881e-08
LmxM.30.0310	1567.67321613017	0.687339606375122	0.113585522695881	6.0512958875528	1.43685256931716e-09	2.27216128413366e-08
LmxM.08.0380	2611.92770585388	0.809474522546499	0.142242583419729	5.69080301471961	1.26443310556857e-08	1.6399737266704e-07
LmxM.25.1750	506.42504928947	0.673824343960697	0.231370445891402	2.91231812846559	0.0035875705042059	0.0108577814707713
LmxM.08.0860	1446.36110147086	0.788589450198975	0.116004284431854	6.79793383547162	1.0613017259327099e-11	2.69354447294588e-10
LmxM.01.0120	816.746697553241	0.871329749721295	0.13051711869546	6.67598057963874	2.45584491234794e-11	5.66763308044567e-10
LmxM.27.1190	30651.1599231133	1.27655097762266	0.235111233295524	5.42956182794588	5.64925797063174e-08	6.29455938922829e-07
LmxM.34.2590	648.526131277072	0.706201564890098	0.149747579482536	4.71594644354472	2.40589720207672e-06	1.83012883373514e-05
LmxM.05.0480	2142.414682265	1.06561771856732	0.441979726780542	2.41101040160704	0.0159083947344155	0.0379063256740361
LmxM.33.4580	1218.91036635443	0.749556302848014	0.129162955383093	5.80318327824609	6.506760003445031e-09	9.11500638983449e-08
LmxM.04.0180	687.734573328116	1.96874375237554	0.233231459133938	8.441158665671	3.14207287269973e-17	2.0960657656798203e-15
LmxM.13.1390	401.071884133715	1.01868594181953	0.167224067228652	6.09174240707014	1.1168830074963302e-09	1.81146528020558e-08
LmxM.08_29.1575	1341.32353440097	0.606815881180466	0.104562990180056	5.803352411169	6.500197019708581e-09	9.11500638983449e-08
LmxM.30.2000	749.640295002224	0.689634862344852	0.206956965297973	3.33226215098355	0.0008614306957314	0.003205223805882
LmxM.14.0720	268.041395023557	1.60768859693019	0.301956100343482	5.32424612419292	1.01372572538342e-07	1.0700727393874e-06
LmxM.30.0450g	330.475778643472	1.09062978668204	0.210368565729502	5.18437620611246	2.16739048417537e-07	2.14728336763543e-06
LmxM.33.4040	951.4218637694	0.690142047523726	0.131886163081898	5.23286166946235	1.66905648117112e-07	1.69440141292224e-06
LmxM.32.2230	805.346355298876	0.686610917950019	0.155747603513937	4.40848464091184	1.0409640105815e-05	6.77739276247953e-05
LmxM.32.1895	919.543770802627	0.774631271669262	0.173270600073225	4.47064459488165	7.79841985095683e-06	5.21777106870773e-05
LmxM.34:ncRNA:rfamscan:184076-184190	71.3022547082229	1.38268364487145	0.517277293239547	2.67300278388818	0.0075175626605996	0.0201884120699251
LmxM.21.0730	12114.3819980273	0.642637773598242	0.280122799925362	2.29412876698888	0.0217831034202386	0.0490209248562183
LmxM.28.1590	384.278775120618	0.898009856930297	0.202140755523367	4.44249777638972	8.89205526700746e-06	5.87146653863327e-05
LmxM.14.0730	215.282599407689	0.783319033406775	0.304058793037072	2.57620911266088	0.0099890214870908	0.0255648066256918
LmxM.34.0470	640.83309683232	1.2273577762245	0.206773138604343	5.93576991919162	2.9246971619233502e-09	4.35684506566951e-08
LmxM.08_29.1090	23.3527800614434	3.05087623038632	0.82100421870088	3.71602990690338	0.0002023776385022	0.0009260719651662
LmxM.30.0470	21.5968588635227	1.60443949454668	0.571514034058993	2.8073492494168	0.0049951053377149	0.0143517649168518
LmxM.01.0710	1732.18997994723	0.787577704195678	0.180984487432154	4.35163098987098	1.35128551517632e-05	8.46922316409668e-05
LmxM.36.2340	1144.7780096582	0.726000834193241	0.174347628663922	4.16409927543495	3.12584094303739e-05	0.0001767798492063
LmxM.30.1200	540.287038188412	1.27852040673214	0.219183031386812	5.83311763982231	5.44011839688562e-09	7.73946255667655e-08
LmxM.16.0600	1203.66341540709	0.988373474499867	0.203937224038521	4.84645939043073	1.25684300016023e-06	1.02938446118701e-05
LmxM.19.0861	1154.60845578849	1.08732851792971	0.146642269203373	7.41483696233404	1.21774517198324e-13	4.43076042000804e-12
LmxM.06.0450	794.820074330366	0.617208144577109	0.12428442862465	4.96609391383317	6.83148819996142e-07	6.05990587575866e-06
LmxM.31.0860	862.565514507651	1.17045209838109	0.178121779829641	6.57107794173475	4.9952301467381897e-11	1.0752821334195802e-09
LmxM.26.0170	3776.38096499475	0.715437091304211	0.153130865679943	4.67206325862181	2.98189085067721e-06	2.20409889440484e-05
LmxM.30.2160	588.857622650025	1.42174639253823	0.227059139443873	6.26156866453586	3.81123930062434e-10	6.768859777329141e-09
LmxM.31:ncRNA:rfamscan:1306302-1306383	343.708331152879	1.52911510256276	0.249429000088358	6.13046238416977	8.76240334098572e-10	1.46152622054616e-08
LmxM.29.1622	804.602289213469	0.739177215970605	0.126377018559867	5.84898444664955	4.94583327649693e-09	7.08529390812444e-08
LmxM.25.1990	977.963780030134	0.653135874376972	0.130984197836296	4.98637152546645	6.15237845756255e-07	5.52303581403241e-06
LmxM.04.0130	3826.2967881645	2.96227865480817	0.215310073797047	13.7581981305735	4.54719217643112e-43	5.34165160954187e-40
LmxM.19.0480	275.001294296304	1.09776307838198	0.333823257174412	3.28845595622606	0.0010073854517992	0.0036800224656354
LmxM.34.5000	25.1163368636797	1.9339940588638	0.52578037361822	3.67833064128049	0.0002347654973691	0.0010572161472433
LmxM.13.1080	2191.38714573631	0.687932701630346	0.129500333238713	5.31220796445559	1.08304903242942e-07	1.13451110747352e-06
LmxM.06.1150	726.466145927349	0.604088895474789	0.133953487046683	4.50969145181167	6.49219815612535e-06	4.4487787864849e-05

## Sheet: T7-vs-DAC3_down
Supplementary Table 4. List of DE genes in DACs mutants compared to parental cells.
T7-vs-DAC3_down
	baseMean	log2FoldChange	lfcSE	stat	pvalue	padj
LmxM.31.0840	2415.17091704587	-0.732164358997425	0.164440185101662	-4.45246615688726	8.48896232064834e-06	0.0003020499941139
LmxM.23.1410	1490.48207990927	-0.613637573093082	0.154227054407984	-3.9787933151456	6.92659215476331e-05	0.0015540579120562
LmxM.34.4760	627.340066250335	-0.84147367738552	0.254097217417963	-3.3116209848193	0.0009275712187715	0.0102770819396673
LmxM.36.1750	1345.06553477283	-0.638223523305165	0.179018544180658	-3.56512520100207	0.0003636825373191	0.0052314354040209
LmxM.30.2600	5161.62881054727	-1.33096772973114	0.184143648803035	-7.22787746622084	4.90601061918891e-13	4.40287197457653e-10
LmxM.19.1160	4516.80610034903	-0.824283966227668	0.211884044261148	-3.8902597366498	0.0001001369811678	0.0020580315442558
LmxM.04.0670	2003.54537121696	-0.63326457791022	0.121503247219226	-5.21191484510397	1.86901342654688e-07	1.50960214462191e-05
LmxM.09.0100	1425.36106639508	-0.761480348140729	0.161462276004895	-4.71615021776135	2.4034901070575e-06	0.0001128662185738
LmxM.02.0400	132.054310668362	-0.772944298065907	0.293233183771642	-2.63593733875578	0.0083905224269069	0.046976177289129
LmxM.05.0490	856.466795281037	-0.70161690625754	0.12879382354333	-5.44759746201256	5.10547409370301e-08	5.68260990032732e-06
LmxM.24.0770	1752.24066322174	-1.04041271552519	0.202536205095593	-5.13692213712675	2.79274596058691e-07	2.0140186717554e-05
LmxM.25.0820	1781.14288364238	-0.623422119456258	0.141575811988982	-4.40345077805221	1.06542465504736e-05	0.0003585597891173
LmxM.36.0020	10454.8947228051	-1.0242760874459	0.315538819584372	-3.24611751034335	0.0011699053826961	0.0120681044393824
LmxM.27:rRNA:rfamscan:982402-983034	12218.9128591052	-0.681439274755897	0.227915786289023	-2.98987308361236	0.0027909338411481	0.022213890498625
LmxM.08_29.0620	1836.0211089254	-1.17365960946185	0.440271284835622	-2.66576460897295	0.0076813455539821	0.0444747154405118
LmxM.20.1365	420.741259153976	-0.624182499476155	0.236173197131752	-2.6429015106568	0.0082198941724237	0.0465480352900417
LmxM.29.1220	850.937538626558	-0.654265792896675	0.202331449894864	-3.23363368985221	0.0012222611493151	0.0123711820839828
LmxM.29.3040	3411.23972949247	-0.610389881763061	0.19609249300696	-3.1127651671061	0.0018534343013771	0.0165495305186535
LmxM.26.0330	682.43216091179	-0.999462899326613	0.207586495669202	-4.81468168776885	1.47434710530251e-06	7.63352664713355e-05
LmxM.24.2230	3537.17434016257	-1.41755200375815	0.245222284619177	-5.78068182489845	7.439848033331981e-09	1.1782676973573e-06
LmxM.25.1130	1631.22491974436	-0.625251817208474	0.17230148087306	-3.62882439570625	0.0002847148216338	0.0044309086981435
LmxM.29.3600	2670.89877709075	-0.636045132335474	0.120452254797028	-5.28047510116984	1.28849334315598e-07	1.18263190143987e-05
LmxM.27.2330	2956.0157499203	-0.769830064280791	0.219398413069894	-3.50882239077793	0.0004500953666423	0.0060691490423541
LmxM.19.1190	350.680309025051	-0.838424255892614	0.207765383891641	-4.03543766621822	5.45006079720387e-05	0.0013062356397334
LmxM.29.3240	2693.77626227363	-0.616980146755522	0.128025741548966	-4.81918822957604	1.44143512049108e-06	7.51127191497191e-05
LmxM.22.1250	1266.58672563762	-0.645621784846305	0.139685230990491	-4.62197599752158	3.80102001624821e-06	0.0001566369319961
LmxM.36.5365	513.619126136153	-0.81598053190014	0.211136432540764	-3.86470739360721	0.0001112224520589	0.0022346859335334
LmxM.36.0830	1024.83301160011	-0.66046791693884	0.170050288083538	-3.88395647183134	0.0001027703140551	0.0020856176548325
LmxM.20.0560	876.451798848425	-0.709507894121593	0.216740851181589	-3.27353099452007	0.0010621274144432	0.0112730658691959
LmxM.30.2630	475.705909614356	-0.734528427392941	0.199984722628417	-3.67292269998912	0.0002397920377116	0.0039127278557512
LmxM.30.3060	509.432898472599	-0.98104898490584	0.29423283386882	-3.33426073496348	0.0008552644597185	0.0097708218403777
LmxM.36.2660	2176.74716832441	-0.858982844561087	0.202183490466834	-4.248531087171	2.15176790376739e-05	0.000636623786034
LmxM.04.0630	4220.08354247824	-0.728041132553142	0.165071664660979	-4.4104549018051	1.03153688503256e-05	0.0003500724126221
LmxM.26.0700	292.916372230204	-0.702663547587448	0.216682128095034	-3.24283111747578	0.0011834833984633	0.0121106647146936
LmxM.11.0630	1364.30089657513	-0.795522353654345	0.196155713973768	-4.05556553790082	5.00131463866407e-05	0.0012400430203958
LmxM.34.2221	3856.71999957357	-0.611975223848526	0.163954559862827	-3.73259044677098	0.0001895206104069	0.0033061727219376
LmxM.11.0330	727.719827126581	-0.716812420640988	0.236537757759585	-3.03043551029831	0.0024420133145003	0.0200631909955342
LmxM.21.1090	4591.24189846971	-1.03569423007865	0.196087985471062	-5.28178321374769	1.27932525344921e-07	1.18263190143987e-05
LmxM.28.1490	1861.4382816433	-0.843998824953095	0.162321631894596	-5.19954620405213	1.99775664078023e-07	1.58194905760607e-05
LmxM.28.0130	595.456250515678	-0.831308865665341	0.18674958102327	-4.45146308286365	8.52871967401939e-06	0.0003021336351186
LmxM.18.1510	1610.97253624472	-0.84699019780343	0.216469467872492	-3.91274670801306	9.12522346068629e-05	0.0019045072323504
LmxM.05.0030	3106.72734622054	-0.905512844787448	0.173083583514109	-5.23165066497272	1.68003020620642e-07	1.39892824489992e-05
LmxM.32.2060	1390.21807416167	-0.703386100858952	0.136563506676467	-5.15061540214652	2.59633116685693e-07	1.94171915136143e-05
LmxM.25.2140	234.279938937625	-1.2965312396204	0.396413973418751	-3.27064969087457	0.0010730073740085	0.0113586901177809
LmxM.36.0550	1593.37021046346	-0.75173961830616	0.179178020935217	-4.19549012977409	2.72282144417504e-05	0.0007662797492892
LmxM.14.1360	2563.51633130345	-1.25914923730737	0.194429308663833	-6.47612875836755	9.4105752059598e-11	4.0004850493967e-08
LmxM.36.6090	845.966068024156	-0.66808454750489	0.174547205168628	-3.82752933144626	0.0001294359637568	0.002507084602552
LmxM.34.1300	2077.49682170418	-1.12786862254794	0.261403287300147	-4.31466885591576	1.59842319770615e-05	0.0004965563141489
LmxM.36.5810	930.733472825728	-0.629759025599708	0.191566529020585	-3.28741679885026	0.0010111106189576	0.0109620677440548
LmxM.32.0765	424.696396821412	-0.76481921039662	0.24052309935981	-3.17981604441447	0.0014736857140922	0.0141701898960991
LmxM.19.1060	1026.4174168463	-0.678881084901492	0.21504901886326	-3.15686669248726	0.0015947423427747	0.0150125103759805
LmxM.20.0630	766.989191509889	-0.60620512317956	0.184798694584278	-3.28035392535253	0.0010367693705501	0.0111208316147858
LmxM.14.0120	690.060057246672	-0.671539536484868	0.172731916178462	-3.8877559593043	0.0001011752732397	0.0020740931014139
LmxM.12.1130	1625.65962254033	-1.1453177843397	0.207357519487063	-5.52339643709502	3.32508317199437e-08	4.00846220599978e-06
LmxM.29.2980	7071.75001695908	-0.824872410027781	0.268021486077405	-3.07763538699863	0.0020865003520842	0.0180822568066353
LmxM.32.2290	229.426041781348	-1.07292040960947	0.344048476166761	-3.11851522077204	0.0018176475339357	0.0163223152789464
LmxM.31.1960	1784.72588746589	-0.890602265661683	0.206194279558587	-4.31923847532653	1.56568524943403e-05	0.0004901565798325
LmxM.34.4700	1808.43517513594	-0.767102616979501	0.154809116684505	-4.95515143686806	7.22739767913839e-07	4.29233022458829e-05
LmxM.08_29.0880	4211.95486624281	-0.635813646158282	0.18721886865865	-3.39609811080281	0.0006835385397698	0.0082648814157503
LmxM.31.2155	742.743015254295	-0.683931751151629	0.19059191774677	-3.5884614585826	0.0003326351544723	0.0049253687956385
LmxM.33.3440	1054.81169443832	-0.809518606473215	0.137126706707835	-5.9034350485642	3.5600982408712104e-09	6.84640797417066e-07
LmxM.18.1380	2195.43047741013	-0.979314091330021	0.204690640449284	-4.78436185054912	1.71531426323314e-06	8.60533745598387e-05
LmxM.07.1090	1055.04979649652	-0.635295201915461	0.160081805379065	-3.96856594921026	7.23064475810449e-05	0.0016042089612615
LmxM.31.3310	3882.06887892287	-1.0122031882856	0.208773214139005	-4.84833838699087	1.24499898830146e-06	6.65950783345094e-05
LmxM.28.1950	417.509182486706	-0.886990018624338	0.272975133241291	-3.24934366032638	0.0011567164168402	0.0119600812337136
LmxM.13.0160	1527.63097238295	-0.617621383355538	0.226000287430786	-2.73283450378217	0.0062791874432951	0.03916370423127
LmxM.26.2640	556.856438967223	-0.834768070391639	0.244693944194504	-3.41147825762329	0.0006461165397554	0.0079251578952158
LmxM.36.0480	3246.97536091063	-0.784981725473986	0.161221561821018	-4.86896241797635	1.12185738989806e-06	6.16411029809977e-05
LmxM.36.2800	623.061562766405	-0.616841575305014	0.201272745198558	-3.06470493407587	0.0021788484223899	0.0184085342130162
LmxM.36.6995	2677.0826711935	-0.939811206466116	0.209038821820238	-4.49586922793845	6.92863119868938e-06	0.0002567782485539
LmxM.36.2500	1335.84770264196	-0.749713780924278	0.156079236454499	-4.8034177892896	1.5597994858521e-06	8.02452257785185e-05
LmxM.09.0930	1723.70459517118	-0.974580439039912	0.158241490637564	-6.15881735639163	7.329019269599501e-10	2.29219406212911e-07
LmxM.22.1410	2011.00280773764	-0.649043203140442	0.125868044774477	-5.1565367866273	2.51559080112848e-07	1.91683272648252e-05
LmxM.03.0180	527.16726989346	-1.01488820785917	0.252151105614255	-4.02492071326373	5.69945149351798e-05	0.0013499844490658
LmxM.36.5150	1138.22017580027	-1.05500883429202	0.391924242388434	-2.69186929561353	0.007105278534338	0.0422290910388876
LmxM.15.0281	388.808944340725	-0.749866219268796	0.202244473252125	-3.70772168559577	0.0002091323161993	0.0035190869123789
LmxM.14.0640	2632.51947645318	-0.692352504182549	0.210659472026556	-3.28659564899731	0.0010140632881802	0.0109793420625089
LmxM.36.0540	1670.0900871958	-0.666509704579386	0.141692205209745	-4.70392639872294	2.55205280674731e-06	0.0001139877300988
LmxM.23.1610	903.402841322056	-0.652127691100611	0.179537304579007	-3.63226847272644	0.0002809406074758	0.0043890856607014
LmxM.03.0190	1521.13356226867	-0.680797498039918	0.133588922869462	-5.09621219646459	3.46516707195783e-07	2.2941110196888e-05
LmxM.10.0870	2186.30857610864	-0.61522343488954	0.19006278068282	-3.23694851079884	0.0012081520826323	0.0122666760892219
LmxM.31.1300	653.538199176113	-0.684580031358343	0.149987735667074	-4.5642400581198	5.01306905851213e-06	0.0001956065641816
LmxM.26.2305	641.340201491668	-0.884787228545959	0.174030822988248	-5.08408345920255	3.69405491991098e-07	2.3680064752477e-05
LmxM.33.3100	229.860586378566	-1.0049265631151	0.334406256269617	-3.00510694484396	0.0026548748424586	0.0213792862438068
LmxM.16.1540	852.604334280456	-0.717158481607751	0.200854404077676	-3.57053899266459	0.0003562474150562	0.0051641584907628
LmxM.36.4170	3340.73127378187	-1.0462010816138	0.140876260162747	-7.42638312803857	1.1160741991246999e-13	1.2877901866186002e-10
LmxM.05.0580	1466.93686616682	-0.772112244646799	0.227814183500067	-3.3892193751254	0.0007009191084817	0.0083747391112527
LmxM.29.2550	342.544557355229	-0.803001191898386	0.275620195868058	-2.9134337901813	0.0035747763439962	0.0263925672124845
LmxM.12.0030	3064.66855262103	-0.603323702090721	0.18486861930521	-3.26352684602821	0.0011003475891967	0.0115572268893914
LmxM.17.1290	4215.68133448266	-0.610744998376976	0.180178589736427	-3.3896646614362	0.0006997816827184	0.0083735357797281
LmxM.34.4270	552.989868685779	-0.61515601909123	0.19589851783743	-3.14017699512015	0.0016884578874998	0.0156791872305346
LmxM.05.0780	3606.85243248439	-0.938134205979477	0.163697744082512	-5.73089269639909	9.99034533498047e-09	1.4671276231025e-06
LmxM.05.0050	1079.06078016277	-1.07182150386506	0.147593754753067	-7.26197057360785	3.81491205317931e-13	3.8516305816911603e-10
LmxM.34.1950	667.507215682015	-0.678813969856225	0.144044731075683	-4.71252203941821	2.44669608952475e-06	0.0001133837143215
LmxM.08_29.1720	2346.34709616555	-1.23745302466079	0.40090481982226	-3.08665040547382	0.0020242551039237	0.0176947061411168
LmxM.09.0060	3231.31603254544	-0.701859271259007	0.213340009317072	-3.28986238214644	0.0010023639332213	0.0108818460868664
LmxM.03.0090	747.808598198155	-0.932488620344112	0.217226545009987	-4.29270106147129	1.76512586320753e-05	0.000540034908982
LmxM.29.3310	1656.91406039881	-0.734608476605278	0.197448538533604	-3.72050602177667	0.0001988240008829	0.0033808451686984
LmxM.06.0560	3714.11709114787	-0.738616206476006	0.211147680230027	-3.49810239767422	0.0004685811884211	0.0062351404594362
LmxM.34.0180	899.459610516287	-0.934313442169829	0.209083992536584	-4.4686034106908	7.8731948253342e-06	0.0002813796221425
LmxM.34.5290	1895.62072685663	-0.646225063679903	0.178631635292929	-3.61764064142497	0.0002973007878681	0.0045652062045843
LmxM.24.0940	1043.08748031414	-0.680714841140169	0.206118035453326	-3.30254865685595	0.0009581046410261	0.0104717336746525
LmxM.05.0250	700.345455862896	-0.666167184323943	0.234571615383827	-2.83993092358553	0.0045123303720558	0.0310973484770432
LmxM.14.1040	751.971259613876	-0.607328958290373	0.154110583798091	-3.94086469159099	8.1188415340454e-05	0.0017486902152129
LmxM.31.3270	1968.35689777536	-0.889630807778747	0.180768045310177	-4.92139418917897	8.59298565130924e-07	4.95753893611605e-05
LmxM.36.5360	1305.45662695187	-0.673646442264851	0.144738829146078	-4.65422061404803	3.25208461900233e-06	0.0001382478287772
LmxM.24.0850	1961.4924360387	-0.728711623055504	0.141623335979655	-5.14542054820816	2.66922156703869e-07	1.94227951324068e-05
LmxM.36.6910	3863.40959731063	-0.619906786877505	0.157499563241955	-3.93592702174792	8.28761568219347e-05	0.0017708749170655
LmxM.36.0440	691.718599810868	-0.763985627814236	0.204527168510721	-3.7353747835911	0.0001874358274733	0.0032911286489184
LmxM.08.0890	571.709885061622	-0.975024738536914	0.265506352816657	-3.67232169096235	0.0002403568521067	0.0039140368840042
LmxM.30.3130	1626.01130149108	-0.732108210297432	0.132303674914686	-5.53354402868645	3.13824159584829e-08	3.89962728764102e-06
LmxM.13.0270	1366.87540518682	-0.688194589466513	0.190786525047378	-3.60714463086748	0.0003095851145266	0.0046914051970577
LmxM.36.3290	709.801674771529	-0.611639022456329	0.161854306044549	-3.77894810094197	0.0001574922411011	0.0028976419849071
LmxM.05.0450	4395.61891484794	-0.871170961893357	0.209275948182787	-4.16278587892219	3.14388154314138e-05	0.000846437707465
LmxM.08.0410	902.465498144985	-0.67191355182074	0.251291960725551	-2.67383624163995	0.0074989059501157	0.0437634850860441
LmxM.01.0030	1370.0775441205	-0.761274134477313	0.177847150463784	-4.2804966652099	1.86476681761403e-05	0.0005683668522969
LmxM.21.1568	672.379498735275	-0.704498682109564	0.176522871649957	-3.99097678122173	6.5801722953943e-05	0.0014929227985926
LmxM.36.0570	1462.15755893387	-1.11393714729262	0.185368750620401	-6.00930385280392	1.86321633796852e-09	4.56036313993082e-07
LmxM.10.0290	4653.83742141606	-0.621320479697679	0.119974857710637	-5.17875571226947	2.233707396928e-07	1.73477448509494e-05
LmxM.32.1680	644.036534591755	-0.847910336750935	0.306375031418798	-2.76755691488412	0.0056478182916788	0.0362043082078494
LmxM.18.0150	548.607442979434	-1.36172080395495	0.230066913050796	-5.91880329899631	3.2429252774292e-09	6.54827686644891e-07
LmxM.21.0740	5654.31190460903	-0.941828186737761	0.230458921155814	-4.08675082749775	4.37456502391999e-05	0.0011041675530688
LmxM.28.0825	1434.02040347038	-0.86537578047095	0.212933554529657	-4.06406487874799	4.82254115281906e-05	0.001205933897564
LmxM.30.0080	3013.92682988989	-0.905739257666008	0.226988140315886	-3.99024925445685	6.60038949731019e-05	0.0014933150131589
LmxM.08.1110	2493.40346356544	-0.913071658872279	0.162190339804188	-5.62963034650908	1.8059624887782e-08	2.49235229905378e-06
LmxM.26.0460	2929.49358510018	-0.668196523974431	0.140962843310142	-4.74023159779975	2.1347406775637e-06	0.0001049278257752
LmxM.26.0620	1407.65492901004	-0.877021647456415	0.156012828554793	-5.62147135963499	1.89337891416032e-08	2.54880358161215e-06
LmxM.36.0180	11000.2739469734	-0.64043101067856	0.182309798879007	-3.51287212545055	0.00044329076703	0.0060074824250031
LmxM.36.2150	878.389746269412	-0.638620410364407	0.15159469042323	-4.21268323172449	2.52354852876674e-05	0.0007227908321577
LmxM.18.1370	1679.80305488026	-1.79165794170508	0.561151037995539	-3.19282656609703	0.0014088753753385	0.0138276115553046
LmxM.19.0260	1423.40855254914	-0.725400310160688	0.233366266286404	-3.10841974593887	0.0018809072194596	0.0167498209609434
LmxM.34.3700	3400.67857814211	-0.816792151756353	0.261333407740315	-3.12547928264875	0.0017751557350988	0.0161100369352738
LmxM.05.1200	1664.75904232061	-1.20722004046024	0.230364485584235	-5.24047809452299	1.60161100276937e-07	1.39099054509335e-05
LmxM.21.1555	4366.23267040938	-1.15098755956036	0.170996625515778	-6.73105423038981	1.68438167885504e-11	9.71767915722298e-09
LmxM.36.3070	1744.83635298013	-0.801332897277991	0.195804680467609	-4.09251145255718	4.26726161591355e-05	0.0010872767215058
LmxM.20.0030	2768.48542434678	-0.630704237946029	0.19007533092859	-3.31818040176387	0.0009060594483106	0.0100941271227654
LmxM.33.4010	3021.69105860121	-0.792856716385911	0.187850604417954	-4.2206769514665	2.43569776637219e-05	0.0007026118163924
LmxM.36.3590	1813.33313047314	-0.70115042089161	0.167400967920726	-4.1884490251194	2.80867379296557e-05	0.000781565303219
LmxM.22.0260	1384.32135362359	-0.735953758665753	0.205059052442974	-3.58898448957974	0.0003319685889121	0.0049253687956385
LmxM.25.1810	518.752283261476	-0.606462396604307	0.205901947934567	-2.94539416789313	0.0032254346978689	0.0245772038251768
LmxM.06.0860	1625.67766507345	-1.06756268428997	0.211140329579615	-5.05617608163967	4.27746422975789e-07	2.67822314602748e-05
LmxM.28.0930	1645.31822696826	-0.665180350144828	0.135301759322662	-4.91627273344268	8.82074898043511e-07	5.05285032021095e-05
LmxM.26.0640	1036.97700791026	-1.70497110092379	0.15249224636716	-11.1807068329145	5.0684676901581e-29	4.0938013533407e-25
LmxM.34.3010	288.339946196304	-0.781727027732233	0.292308956311894	-2.67431774104837	0.0074881466572736	0.0437634850860441
LmxM.36.1430	5515.71907034775	-0.882632484162245	0.210699209979224	-4.18906404181238	2.80107349193129e-05	0.000781565303219
LmxM.36.5845	671.61898422547	-1.29501545051686	0.272889097564102	-4.74557416209219	2.07915716352971e-06	0.0001030267019007
LmxM.29.2820	1497.99054811538	-0.635112946783056	0.142727556343134	-4.44982709054563	8.59394514171443e-06	0.0003031148249328
LmxM.31.2951	2003.68342633964	-0.701703483701989	0.109659870108996	-6.39890857981625	1.5649149928922002e-10	6.01896114170965e-08
LmxM.11.1030	1944.4776561261	-0.918238191382837	0.139231342525342	-6.59505377688724	4.25101745292944e-11	2.14596674795694e-08
LmxM.03.0600	1754.29166699523	-0.72018614996866	0.161090973410483	-4.47067973283345	7.79713860164117e-06	0.0002798999488242
LmxM.30.2580	1927.59572172535	-0.638487123896476	0.181527744458181	-3.51729773210268	0.0004359644749616	0.0059380861117459
LmxM.25.0920	600.601130392881	-0.879201784338961	0.23275634698612	-3.77734826879454	0.000158507011323	0.0029030864636193
LmxM.25.1180	129.984454528979	-1.4317873236401	0.422883401136492	-3.38577328831588	0.0007097799588646	0.008455593993731
LmxM.08.1222	2940.93540891699	-0.747349609561371	0.14693112026975	-5.08639427909699	3.64934993362031e-07	2.3580639531081e-05
LmxM.24.2060	3567.37771865148	-0.710917904373181	0.219032514831471	-3.24571858621164	0.0011715458612086	0.0120696121441104
LmxM.33.4290	2249.47410641261	-0.675729507147842	0.19301594476957	-3.50089992800623	0.0004636899261514	0.0061836485743945
LmxM.18:ncRNA:rfamscan:569325-569396	391.998373074989	-0.844868233813622	0.247543948185976	-3.41300298393434	0.0006425123865233	0.0078988927640019
LmxM.08_29.0840	1013.22148078663	-0.800019496696584	0.14988881543561	-5.33741956910895	9.42787021629646e-08	8.95869502788547e-06
LmxM.25.0160	801.752411645273	-0.634538370300272	0.204430749019164	-3.10392821698651	0.0019096965819814	0.01695013109084
LmxM.28.2260	719.711233983873	-0.71044550888695	0.237765024191722	-2.98801521082462	0.0028079557910263	0.0223007462380724
LmxM.18.0530	328.872960452496	-0.812997997607886	0.298894515103807	-2.7200164490323	0.0065278668971921	0.0400192939515893
LmxM.26.2480	618.807453179689	-0.655632447414122	0.195202572040916	-3.35872852780186	0.0007830194804946	0.0091029802106514
LmxM.05.0140	2123.49824242864	-0.742591598014597	0.223858187083878	-3.31724118598509	0.000909111004872	0.0101141729839553
LmxM.14.1440	3660.60729807858	-0.747158299292566	0.258902461819047	-2.88586788261122	0.0039033597627809	0.028149497146412
LmxM.34.4430	2142.0066214607	-1.00049643883525	0.244613674932969	-4.09010836826441	4.31171684265898e-05	0.0010951489603193
LmxM.31.0985	311.047007075512	-0.835206353093169	0.28276689861864	-2.95369209470161	0.0031399711985222	0.0242173415524345
LmxM.30.1190	1884.19974096752	-1.19373033741504	0.204530252868374	-5.83644874376248	5.332515660632551e-09	9.36320195454981e-07
LmxM.33.3890	513.386174843772	-0.633383708436388	0.220683207911828	-2.87010377649327	0.0041033710312103	0.0291751125168009
LmxM.26.2560	518.568654958556	-0.643942892713855	0.222922544666871	-2.8886396110189	0.0038691223059081	0.0280025993412367
LmxM.14.0851	619.019414304024	-0.607130750650432	0.226750346075938	-2.67752954364668	0.007416731135246	0.0434723783594938
LmxM.24.1910	312.610389328655	-0.802866334666713	0.248435101962655	-3.23169442773591	0.0012305857452383	0.0124087903424346
LmxM.32.3250	965.972439024098	-0.654057009955405	0.156278827847406	-4.1851927030963	2.84924283587934e-05	0.000781565303219
LmxM.09.0910	199.579514363769	-0.758043682243428	0.251125791019886	-3.01858156091742	0.0025396103170017	0.0205992415590739
LmxM.36.2030	2932.01728245121	-1.72791940986947	0.466803929987324	-3.70159567833199	0.000214247836129	0.0035976710445209
LmxM.13.1660	4350.04096169409	-0.692715046174713	0.158562997765051	-4.36870553621302	1.24985154115593e-05	0.0004047768932263
LmxM.34.1790	477.549025854581	-0.657843481247561	0.200694701025814	-3.2778318405275	0.0010460769337285	0.011179630064183
LmxM.25.1770	2650.67839308639	-0.869188009719887	0.246558534219264	-3.52528056865766	0.0004230344857245	0.0058208680429247
LmxM.32.2800	2157.13760964067	-0.714290411784232	0.161842760263789	-4.41348386928155	1.0172030040218e-05	0.0003466645005689
LmxM.17.0790	954.655506789691	-0.645346855130486	0.244348108874993	-2.64109617259465	0.0082638257630342	0.0466761683133061
LmxM.25.2450	18419.421301322	-0.882521003237362	0.30236290659357	-2.91874758441725	0.0035144066978367	0.0261229627485748
LmxM.17.0430	935.485167748385	-0.779545691372692	0.230834065614427	-3.3770825345805	0.00073259064403	0.0086427767364209
LmxM.22.1460	3915.1575724903	-0.640812843665793	0.168228867073662	-3.80917291314338	0.0001394324255847	0.0026374606591295
LmxM.14.1320	1930.75372990566	-0.616240776573389	0.174528642238686	-3.53088621253706	0.0004141698784785	0.0057379933249932
LmxM.08_29.0850	1373.66624507803	-1.12431996039771	0.188592184995207	-5.96164661025739	2.4970872888536102e-09	5.47507076777619e-07
LmxM.31.3780	661.956936433311	-0.6220724574774	0.238001304247586	-2.61373549797977	0.0089558339673908	0.0491414884202551
LmxM.21.0810	1418.56722784877	-0.673961562228988	0.21579574104704	-3.12314579962945	0.0017892908694536	0.0161837652324491
LmxM.34.3440	662.755163164108	-0.686833632602314	0.154622851769467	-4.44199304787329	8.91294405735076e-06	0.00031164436862
LmxM.29.2900	2018.88371807037	-0.913576306792049	0.15165558747449	-6.02402009715417	1.70137226221346e-09	4.43289798770907e-07
LmxM.07.0340	3042.60463519104	-0.645633544416494	0.178971640092189	-3.60746285883019	0.0003092057825259	0.0046914051970577
LmxM.28.1820	1590.1599079467	-0.708156701098202	0.1384095498608	-5.11638612950048	3.11445162056192e-07	2.16857118442057e-05
LmxM.03.0120	1222.61373800596	-0.639307919194496	0.189838869520522	-3.36763446184231	0.0007581604541681	0.0088620289266517
LmxM.34.3230	5624.7227535164	-1.40487658460618	0.236866442869023	-5.93109166325859	3.0092714736239804e-09	6.23227838268228e-07
LmxM.29.0120	1431.43792861444	-0.659404920805649	0.199623757845564	-3.30323869223916	0.0009557499761656	0.0104717336746525
LmxM.12.0060	1162.7879508013	-0.67364539059936	0.124085166346006	-5.4288954146294	5.67038985487581e-08	6.06828423885627e-06
LmxM.19.1365	301.551580408061	-0.85064648499852	0.303187330888056	-2.80567952000804	0.0050210603518006	0.0333786867995832
LmxM.05.1060	259.142927242196	-0.736612757445958	0.239495104025934	-3.07569025447048	0.0021001589378445	0.0181362716964161
LmxM.15.1450	1717.37881435794	-0.906278006700183	0.207917556035817	-4.35883349140591	1.30757549300922e-05	0.0004200196538219
LmxM.24.0330	1007.81614680072	-0.624758063215585	0.169702242476994	-3.68149562490479	0.0002318697689012	0.0038065287061285
LmxM.19.1315	392.003304914797	-0.759929346535869	0.209207464456731	-3.63241984940284	0.000280775800794	0.0043890856607014
LmxM.32.2540	3790.85957150203	-0.829294336278151	0.154547297606537	-5.36595818316704	8.05205969042305e-08	7.83572121922253e-06
LmxM.34.5040	6822.6752479444	-1.10346312761933	0.227450799170694	-4.85143658163721	1.22570403688229e-06	6.60000767059884e-05
LmxM.36.1900	1175.14363324265	-0.650526505363125	0.163127173810911	-3.98784880633795	6.66751318788251e-05	0.0015042878217465
LmxM.28.2420	1768.17552813557	-0.924346498024473	0.211609124858474	-4.36817882330303	1.25286892790141e-05	0.0004047768932263
LmxM.28.2160	640.482751914861	-0.701941442185558	0.173330044501212	-4.0497390063305	5.12747863335037e-05	0.0012626416134625
LmxM.36.3630	152.107885035978	-1.0004643787732	0.382762953323087	-2.6137962676046	0.0089542412960806	0.0491414884202551
LmxM.29.1370	160.83517240769	-1.50698997326996	0.559944031603116	-2.69132250406431	0.0071169358289486	0.0422362165249213
LmxM.20.1310	320.922460394806	-1.12216973481796	0.350556299092481	-3.20111131285624	0.0013689863520638	0.0135340303128757
LmxM.34.1650	1050.33302966067	-0.747080313389524	0.161261039605644	-4.63273903737984	3.60859299685875e-06	0.0001510186820498
LmxM.18.0020	857.241355126412	-1.29344501979508	0.140550237728836	-9.20272381389013	3.4898901292990804e-20	9.39594752478288e-17
LmxM.22.0170	1009.26163223184	-0.689982992830008	0.193970127870621	-3.5571610969408	0.0003748842757945	0.0053121759571796
LmxM.29.2130	1075.87552894286	-0.828040719684725	0.232844921670065	-3.55618973240068	0.0003762723827662	0.0053143226083297
LmxM.36.5350	841.282623629876	-0.7825024469779	0.213346918604677	-3.66774665458302	0.0002446974583977	0.0039767029607212
LmxM.27.0650	3630.23332297117	-0.835367741336192	0.160487454094359	-5.20519031254017	1.93797889768621e-07	1.54980748085262e-05
LmxM.32.1590	1615.12982061572	-1.08206396842811	0.100898087798487	-10.7243258225983	7.82556495564229e-27	3.16035440733614e-23
LmxM.36.6940	13304.3304436317	-0.858366318826171	0.184017932695134	-4.66457973010837	3.09248413256134e-06	0.000133572162239
LmxM.29.3190	1000.85200411174	-0.993562936248815	0.162964203948817	-6.09681704431773	1.08201235339094e-09	3.01359095804779e-07
LmxM.34.4130	205.508925419092	-1.57364165508843	0.534401599568769	-2.94467991180839	0.0032328892792029	0.0246107886033194
LmxM.21.0570	752.623303856234	-0.610806908533377	0.169951403135418	-3.59400921242575	0.0003256283152885	0.0048886615289696
LmxM.26.1570	4023.85430727903	-0.83275821744636	0.161601622591745	-5.15315504937819	2.56140013290765e-07	1.93349802556029e-05
LmxM.36.3380	1560.72648837319	-0.641389303350328	0.148537139363551	-4.31803996023175	1.57420933874368e-05	0.0004909223486113
LmxM.12.0530	2669.10786126811	-0.642574059491691	0.167672883295901	-3.83230756733459	0.0001269468899355	0.0024766908937418
LmxM.08_29.0020	2962.70507201602	-0.849235346994985	0.151548944341896	-5.60370348129315	2.09819532682309e-08	2.77821699258199e-06
LmxM.07.1101	13407.3884624351	-0.614794559786456	0.210427655287837	-2.92164335027874	0.0034819000247185	0.025953980641635
LmxM.21.1552	4654.3060275412	-0.859993927878582	0.182145602864238	-4.72146411637274	2.34152946022932e-06	0.0001119084819542
LmxM.36.2350	647.826839067092	-0.680893821025432	0.175184930614211	-3.88671456293741	0.0001016101154926	0.0020767944352224
LmxM.32.1630	3307.32977667599	-1.16856354047813	0.238672216314188	-4.89610210406658	9.77562873471921e-07	5.48317731182827e-05
LmxM.20.0050	311.613351788925	-1.00178945883884	0.239301071050521	-4.18631414577891	2.83520880609952e-05	0.000781565303219
LmxM.30.3180	8601.92022681155	-0.797225490974722	0.296627695834353	-2.6876299892776	0.0071961087208901	0.042509832459558
LmxM.13.0690	608.486180618282	-1.25862323641479	0.280401472214391	-4.48864703339526	7.16769445653767e-06	0.0002631521278429
LmxM.36.3780	1276.98322110873	-0.70254165011097	0.127687886562746	-5.50202269786759	3.75458602826239e-08	4.33225590718219e-06
LmxM.14.0040	1191.32985462864	-0.607263182594454	0.170094211123494	-3.57015784713309	0.0003567661802458	0.0051641584907628
LmxM.30.2290	1046.25479577374	-0.653558722289918	0.142927755927277	-4.57265083363133	4.81592306047837e-06	0.0001897473685828
LmxM.25.0590	2428.10583894202	-0.763371867133635	0.150048327070923	-5.08750668558146	3.62801600605936e-07	2.3580639531081e-05
LmxM.33.0010	3481.81587312142	-1.23267514562607	0.235317568908074	-5.23834727405164	1.6202097414902e-07	1.39217383851237e-05
LmxM.33.2390	285.118956188478	-0.720726135751262	0.231394098842912	-3.11471268867813	0.0018412415963968	0.0164692230056445
LmxM.29.2350	688.80334283123	-0.914638830191917	0.178599307497403	-5.1211779206099	3.03632991271053e-07	2.15126637762833e-05
LmxM.29.2740	3955.39559057664	-0.663549015913284	0.126445678059904	-5.24770024641669	1.54009611444588e-07	1.35210394743254e-05
LmxM.25.1170	621.193882766171	-1.32512680624201	0.253399769177134	-5.22939231770058	1.70068124481951e-07	1.40167371575584e-05
LmxM.05.0010	1171.36587376329	-1.0583361800672	0.153399337604269	-6.89922262113958	5.2287876175758494e-12	3.2486859682430902e-09
LmxM.36.0050	1846.42340940252	-0.835857868244214	0.220292162902807	-3.79431504611898	0.0001480515931932	0.0027489947545339
LmxM.03.0920	1299.08614627062	-0.617250911900149	0.116304918507458	-5.30717806109437	1.11335406500436e-07	1.0456466026791e-05
LmxM.28.0520	787.963741627793	-0.725298412915692	0.164124444248326	-4.41919798258869	9.90678610162928e-06	0.0003390555565375
LmxM.25.1420	2040.4519482594	-0.746984592398956	0.175556839153131	-4.25494441573644	2.09100953450347e-05	0.0006255216300068
LmxM.04.1230	8779.31991931372	-0.868029872928826	0.172395268509496	-5.0351142489796	4.77563915955287e-07	2.92218465846277e-05
LmxM.33.2340	3725.84597120089	-0.812750059758216	0.166891021058299	-4.86994479753529	1.11629430178294e-06	6.16411029809977e-05
LmxM.24.0310	400.05469513119	-0.67742130836521	0.230740942920489	-2.93585221500392	0.0033263275143427	0.0251797069665849
LmxM.24.0630	1071.26221739362	-0.683950173925381	0.157106778247839	-4.3534097099645	1.34036313581578e-05	0.0004279096066396
LmxM.27.2100	2530.93865420933	-0.631244766392468	0.152207274554233	-4.14727067573598	3.3646220065692e-05	0.0008927379458711
LmxM.08_29.2800	1167.0306728861	-0.667654465415022	0.209465221651702	-3.18742395587366	0.0014354619854053	0.0139504075299375
LmxM.29.3450	1179.60522914585	-0.75732019469183	0.178329552485877	-4.24674533264364	2.16898257890924e-05	0.0006382736056715
LmxM.18.1520	2313.56593216052	-0.981731699942933	0.234318128070865	-4.1897385747552	2.79276018063305e-05	0.000781565303219
LmxM.36.1550	707.838371865147	-0.763079167289374	0.173975343977514	-4.38613397647888	1.15383068041961e-05	0.0003849244195706
LmxM.05.0350	7925.27131601053	-0.867191134699519	0.132678019370731	-6.53605728222697	6.31617326466384e-11	2.83420730326055e-08
LmxM.34.1100	731.692388035405	-0.824748753371745	0.159214361870804	-5.18011530920179	2.21748782810808e-07	1.73477448509494e-05
LmxM.34.1420	935.30177393401	-0.671197796043271	0.255119713530613	-2.63091309861764	0.0085155807488005	0.0474674573554601
LmxM.33.3670	2673.48872363997	-0.65745365526558	0.168747687313677	-3.89607505579303	9.7764103667238e-05	0.0020195413435301
LmxM.27.2110	546.619653776059	-0.766018993082549	0.221362843102909	-3.46046781088023	0.0005392376984947	0.0069575445539016
LmxM.33.0820	630.337665273421	-0.643660680039494	0.215284879452222	-2.989809045936	0.0027915189867654	0.022213890498625
LmxM.36.5820	827.447515840834	-1.31107076012176	0.282875923238247	-4.63479091862313	3.5729842639961e-06	0.0001503072598973
LmxM.05.0280	2695.79712073721	-0.79759437498698	0.175861382753995	-4.53535826056081	5.75057870626059e-06	0.0002201299725614
LmxM.25:ncRNA:rfamscan:456227-456366	2459.59959569845	-0.615335363962717	0.215950723859171	-2.84942487325951	0.0043798348156757	0.0304439981120596
LmxM.11.0100	2973.56865816717	-0.769864030610677	0.15223532802181	-5.05706553540832	4.25756958953649e-07	2.67822314602748e-05
LmxM.07.1140	598.252602309288	-0.626910065649672	0.168193290531457	-3.72731910808549	0.0001935273662845	0.0033315902758541
LmxM.36.1770	1229.78901970894	-0.833017502117824	0.155608421146719	-5.35329319569662	8.63677332463436e-08	8.30466882655616e-06
LmxM.14.0450	2926.6955755965	-0.740669442400154	0.121656991745675	-6.08817817843573	1.14202735352171e-09	3.07471831146495e-07
LmxM.16.1370	2010.18744502784	-0.649999301345663	0.142993080173372	-4.54566962651319	5.47608743863391e-06	0.0002116285083341
LmxM.31.2980	1637.38920856015	-0.663735005898636	0.202607735759508	-3.27596082849709	0.0010530316500051	0.0112059771239681
LmxM.34.4770	2757.75042421114	-1.1833971432432	0.134986086526472	-8.76680829628413	1.83802348056857e-18	3.71142891313809e-15
LmxM.32.2320	540.737119293684	-0.922431907570576	0.197887467874512	-4.66139628485985	3.1407132727855e-06	0.0001349337292781
LmxM.28.0210	1947.44816691165	-0.887365160009183	0.197337932340126	-4.49667810687174	6.90233629195474e-06	0.0002567782485539
LmxM.36.3910	5335.13568253367	-1.07293719405767	0.267599400961621	-4.00949026867048	6.08499605768357e-05	0.0014082668526621
LmxM.15.1010	3089.75754853348	-0.983220769503576	0.268280162177052	-3.66490299366488	0.0002474323492797	0.0040050322347341
LmxM.16.0550	4717.4801807867	-0.690897169340515	0.187334702559877	-3.68803622553427	0.0002259914819532	0.0037251697953803
LmxM.31.0020	3740.8987692915	-0.689769135921681	0.168263489868768	-4.09933929493348	4.14331249776719e-05	0.0010623979379195
LmxM.07.0430	1351.9752956267	-0.791858123967486	0.229461893552269	-3.45093519324204	0.0005586476960762	0.0071736048349882
LmxM.19.0710	1395.66622691198	-0.77412181853892	0.207356249838728	-3.73329388017481	0.0001889918640697	0.0033040850348296
LmxM.26.1240	3969.55701370879	-0.877521203337095	0.167145629127321	-5.25003978816972	1.52066360899953e-07	1.34971428240541e-05
LmxM.34.4380	1878.58195604062	-0.784858034371214	0.19388728221473	-4.04801194490923	5.16545109033486e-05	0.0012642832865646
LmxM.14.1200	1659.28040864551	-0.686816764645488	0.14424256259914	-4.761540229663	1.92120989047363e-06	9.57877301565153e-05
LmxM.08_29.2410	536.038403744432	-0.631964813732688	0.189736436777318	-3.33075093253904	0.000866120604879	0.0098530367966311
LmxM.27.0930	1324.6669968581	-0.64168250990747	0.161979407451155	-3.9615067125182	7.44782878735094e-05	0.0016302469678979
LmxM.34.4125	904.176833664129	-0.870141547712818	0.25160143835895	-3.45841245339552	0.0005433688353399	0.0069996652042123
LmxM.28.2080	752.129029621144	-1.16454695106455	0.2545443577873	-4.57502559156175	4.76161778389677e-06	0.0001894560928105
LmxM.29.1610	1536.83508912389	-1.73174284327087	0.523557821247415	-3.307643918192	0.0009408435501848	0.0103956133445181
LmxM.34.0330	645.734981398527	-0.743436008903042	0.180849388881354	-4.11080188604216	3.94287401083365e-05	0.0010207241469712
LmxM.29.1380	563.512276462316	-0.610775593092047	0.197635350421904	-3.09041672852649	0.0019987584204459	0.0176067983895203
LmxM.32.0650	2603.85103767867	-0.739806293968919	0.199180726874878	-3.71424638104495	0.0002038101542075	0.0034366902203228
LmxM.16.0880	1753.13118686442	-0.72776006369726	0.147360203908095	-4.93864723579745	7.86663712978536e-07	4.57113871203427e-05
LmxM.19.1460	846.038584020646	-0.705152610787797	0.216975964979081	-3.24991116345897	0.0011544106440506	0.0119540702205091
LmxM.30.2020	860.908970525537	-0.638980686895431	0.171445011713789	-3.72702991185389	0.0001937494722338	0.0033315902758541
LmxM.03.0870	916.99878873514	-0.631133725494716	0.175044197323033	-3.60556782313668	0.0003114711272525	0.0047111466195113
LmxM.36.4040	1680.19737143262	-0.787426343416449	0.14929980127016	-5.27412854349077	1.33388392638719e-07	1.19830711690196e-05
LmxM.36.1260	8638.03298184441	-1.13148783034726	0.20535005476236	-5.51004396690647	3.58744079443973e-08	4.19938540531734e-06
LmxM.21.0550	996.93618847917	-0.61945146082241	0.148838902025185	-4.16189216927704	3.15621390979638e-05	0.0008469348753961
LmxM.33.3600	285.151676927029	-1.461498544801	0.438151874974774	-3.33559806148302	0.0008511612885874	0.0097377191613606
LmxM.33.3490	1486.6580915783	-0.673613065030029	0.228374591557188	-2.94959724038017	0.0031818842527333	0.0243371961262566
LmxM.34.4560	1299.25716981163	-0.678510002476443	0.214886019729296	-3.15753441443608	0.0015910945473599	0.0149956483769266
LmxM.34.3370	1231.55061277573	-0.612330826361657	0.207392595365797	-2.95252019620871	0.0031519145109497	0.0242457271475627
LmxM.07.0040	582.662694170516	-0.869611083355745	0.220529622644128	-3.94328468406736	8.03731523390482e-05	0.0017404127384517
LmxM.17.0010	2459.19081571704	-0.811583087497304	0.202869590490123	-4.00051622097013	6.32044542907803e-05	0.0014502908446211
LmxM.14.1340	1034.67738749723	-0.798191993888461	0.201058445915446	-3.96995008219718	7.18876910301537e-05	0.00159955063485
LmxM.23.0200	4662.15317406663	-0.797932917874466	0.156449933575121	-5.1002445296107	3.39214949721946e-07	2.28319929075346e-05
LmxM.32.1330	1707.49965432484	-1.11469441865631	0.177163914312123	-6.29188185971365	3.13640155136985e-10	1.10142240567019e-07
LmxM.31.0230	2571.8266184249	-0.664792336927561	0.162586720920006	-4.08884768181433	4.33521392526945e-05	0.0010976652938683
LmxM.36.4460	2045.22124252744	-1.03796937626183	0.203104046701887	-5.11053025834264	3.21255851589241e-07	2.20969843711043e-05
LmxM.19.1485	425.44554067076	-0.892593211332483	0.21527352297994	-4.14632138210354	3.37859517502694e-05	0.0008927379458711
LmxM.34.2140	496.026660150693	-0.600286984794991	0.184068024146269	-3.26122360241111	0.0011093252414264	0.0116363895779235
LmxM.33.0705	509.659805155525	-0.782087321117378	0.184340567552612	-4.24262185747132	2.20923511674005e-05	0.0006457853418967
LmxM.29.0730	1458.8649224911	-1.33149614670344	0.186486347731359	-7.13991218607333	9.33905622395362e-13	7.543155712087341e-10
LmxM.28.2430	2330.91769322375	-0.766073085481663	0.15807320674326	-4.8463183689688	1.25773627001868e-06	6.68337885061901e-05
LmxM.25.1470	255.739775757508	-0.788788457562556	0.253165649774005	-3.11570095811453	0.0018350826384744	0.0164323308990663
LmxM.31.3610	3242.7759022306	-0.998634963689241	0.177204753118561	-5.63548632931472	1.74564992606389e-08	2.47361657066983e-06
LmxM.12.0670	3393.54716517833	-1.0410792307043	0.21206391642214	-4.90927097956589	9.14155882738969e-07	5.19974441188919e-05
LmxM.34.5150	923.069438098339	-0.708917230475203	0.260267709751931	-2.72380016388085	0.0064535542150015	0.0397860417373185
LmxM.08_29.0870	2591.64964181819	-0.784903136858911	0.166586078320735	-4.71169706839311	2.45662374721665e-06	0.0001133837143215
LmxM.34.0100	4976.53017914848	-0.814782415093599	0.169757626152391	-4.79968077759386	1.58918731335935e-06	8.1239657784832e-05
LmxM.30.1890	155.977401333564	-1.28675645078494	0.36429422937782	-3.53219004589394	0.0004121330526668	0.0057294297183997
LmxM.06.0350	1720.25794746707	-0.957800854037395	0.149273630839966	-6.41641024371034	1.3952514765744e-10	5.63472308814572e-08
LmxM.36.3100	1632.6486907501	-0.720087921650222	0.137633777453125	-5.23191279768127	1.6776489457538e-07	1.39892824489992e-05
LmxM.27.2270	1031.70708191593	-0.63466686521741	0.199911747483608	-3.17473521794636	0.0014997328399357	0.01433531615167
LmxM.25.0910	9612.7477701774	-0.79869751056563	0.18932970574858	-4.21855359362498	2.45874531626244e-05	0.0007067361537171
LmxM.10.0990	970.506133337115	-0.687764491660432	0.207229690845844	-3.31885112047989	0.0009038860646264	0.0100838228508123
LmxM.28.1570	997.888893294295	-0.701077871295283	0.137733145630114	-5.09011732860618	3.57842030751636e-07	2.34982933526908e-05
LmxM.30.1780	1118.83153441754	-0.81816946382037	0.181130775642342	-4.51700966287427	6.27190444403533e-06	0.0002378317943402
LmxM.23.0760	549.126972979372	-1.31211629062373	0.256299967708182	-5.11945554405093	3.06418987885558e-07	2.15212710013187e-05
LmxM.34.3900	968.499162487249	-0.737209705062389	0.202036777480367	-3.64888865411658	0.0002633772192327	0.0041816218968327
LmxM.34.4280	731.9724557165	-0.63802296288118	0.185290856046798	-3.4433591408312	0.0005745357965461	0.0073051600662354
LmxM.29.2470	126.194399824514	-1.13423629090046	0.384486220970355	-2.95000504319222	0.0031776874244622	0.0243349336973719
LmxM.08_29.0868	538.849006503552	-0.755090766553042	0.268204681895461	-2.81535266728623	0.0048723732378123	0.0327133488294352
LmxM.19.0300	424.980547247725	-0.937573226448325	0.320441671695513	-2.92587796552009	0.0034348564710813	0.0256882738119668
LmxM.13.1620	434.127081297783	-1.20053948301022	0.22125318664968	-5.42608900323361	5.76022438957852e-08	6.06828423885627e-06
LmxM.28.1060	2153.33492981104	-0.791215334708861	0.24389012024247	-3.24414672444399	0.001178030471322	0.0121106647146936
LmxM.36.7000	1371.40055243658	-1.03625545882867	0.211281879359857	-4.90461113829695	9.3612606522251e-07	5.28747568447707e-05
LmxM.15.0185	471.802220871438	-0.601437945560152	0.175729818705904	-3.42251502897581	0.0006204466775234	0.0077097658682413
LmxM.25.2010	8930.14317630678	-0.761578907658168	0.206444675074437	-3.6890218039461	0.0002251179279259	0.0037183589035946
LmxM.08_29.0510	904.508970367997	-0.796086572810256	0.227672642635721	-3.49662815696308	0.0004711781083164	0.0062593841790652
LmxM.26.2660	1268.40035340667	-1.03204435557768	0.195687480949045	-5.27394164702042	1.33524378508328e-07	1.19830711690196e-05
LmxM.34.0190	1166.25599888907	-0.743880852824299	0.226974898259562	-3.27737057502111	0.0010477875397531	0.011179630064183
LmxM.34.1890	214.873939912914	-0.967444486273928	0.305000818835895	-3.17194061959047	0.0015142396543669	0.014456871972012
LmxM.28.0890	2159.00446698613	-0.970298894370029	0.215966937645976	-4.49281220980497	7.0288762205062e-06	0.0002592339417033
LmxM.14.1160	19334.0624908193	-0.923428428962116	0.17020714549458	-5.42532116544732	5.78504254539969e-08	6.06828423885627e-06
LmxM.08.1100	7988.23226909225	-1.00580374397036	0.19601891990282	-5.13115644382189	2.87967438848092e-07	2.05833009166021e-05
LmxM.21.1210	747.024766474174	-0.76406771829465	0.220077234198254	-3.47181625159078	0.0005169500400932	0.0067454046427032
LmxM.05.1110	8467.35533591964	-0.771567144307719	0.215863817843834	-3.57432362687992	0.0003511344092265	0.0051009219843932
LmxM.31.0270	2184.04067885616	-0.637571762294228	0.187673744033805	-3.39723473614607	0.0006807054816259	0.008242965779749
LmxM.28.1200	1228.24148056051	-1.69064227287151	0.625062095836818	-2.70475890976578	0.006835397893607	0.0414174859614884
LmxM.08.0470	415.399066546986	-0.859974317902799	0.196480858813188	-4.3768859882705	1.20386905153847e-05	0.0003952703385884
LmxM.24.0140	2014.66236436986	-0.715135343027262	0.152514793486047	-4.68895722625549	2.74600774567787e-06	0.0001205530756489
LmxM.36.3210	564.096911305646	-0.897741664369969	0.312651016632063	-2.87138571958158	0.0040867652037996	0.0291454400690569
LmxM.36.4450	1832.04219924913	-0.758662197369727	0.139292541948156	-5.4465385350789	5.13594803421932e-08	5.68260990032732e-06
LmxM.34.1380	4738.16721935082	-0.647483209530298	0.197610346874376	-3.27656532044809	0.0010507800360244	0.0111967682730472
LmxM.31.3320	666.979328484049	-0.675006016141306	0.199034569826213	-3.39140088443272	0.0006953630908449	0.008333008434354
LmxM.34.4470	10444.754455118	-1.3373288538292	0.217399127610485	-6.15149135384432	7.67577115854217e-10	2.29619272768686e-07
LmxM.33.0840	394.406510483743	-0.755370485436552	0.23364089936002	-3.23304048009417	0.0012248020598457	0.0123813845273766
LmxM.32.2140	311.283366510514	-1.07199115970472	0.322491631573078	-3.32408985149681	0.0008870761040829	0.0099374669801355
LmxM.12.0080	731.624060904673	-0.715601654883345	0.199272984875763	-3.59106205655266	0.0003293332020228	0.0048998828044564
LmxM.15.0275	1426.52871853158	-0.667204466179276	0.114894020818541	-5.80712957407096	6.355295316298071e-09	1.04881749701735e-06
LmxM.31.0140	718.363274560579	-0.69121829485814	0.174200460626517	-3.96794757242405	7.24942764467577e-05	0.0016042089612615
LmxM.36.5930	514.995096627438	-0.737186317769155	0.201738305853646	-3.65417125245394	0.0002580140190103	0.0041266915476173
LmxM.36.6980	4664.06264148925	-0.628405965988467	0.203277965682938	-3.09136292208188	0.0019923995156381	0.017587552882852
LmxM.05.1050	620.103668932249	-1.06848406992146	0.227927369470997	-4.68782697050087	2.76121319735735e-06	0.0001205530756489
LmxM.29.3480	435.110405329362	-0.927200128881754	0.269297286018004	-3.44303554852672	0.0005752236971803	0.0073051600662354
LmxM.10.1227	553.222250339528	-0.615886878134992	0.197932560356725	-3.11159961264083	0.0018607668394464	0.0165887569119304
LmxM.32.1700	846.789644888275	-0.77653685163336	0.193974329769143	-4.00329699583213	6.24658033952209e-05	0.0014415322686377
LmxM.34.1310	2247.87594788004	-0.734111800626332	0.193025711241862	-3.80318143061516	0.0001428496568426	0.0026895027466625
LmxM.27.1260	3949.0642525186	-0.877662300613579	0.213479926222466	-4.11121699423379	3.9357908600969e-05	0.0010207241469712
LmxM.23.0370	2465.08368587756	-0.771948816347339	0.149118366319189	-5.17675210238674	2.25781895582804e-07	1.73680035297362e-05
LmxM.16.1420	3194.15744815876	-0.900441781598678	0.207535125012918	-4.33874401522455	1.43299317114091e-05	0.0004538935624825
LmxM.03.0030	1372.37842406321	-0.688950009912008	0.165861792929758	-4.15375957140277	3.27056819875835e-05	0.0008718277010353
LmxM.18.1580	4195.80457915419	-1.13345685496663	0.142234023918595	-7.9689572420123	1.6001880803308e-15	2.58494382496638e-12
LmxM.36.1330	546.922235052155	-0.65612289341456	0.229935387853966	-2.85350984699784	0.0043239187840104	0.0303162257104622
LmxM.25.1710	1676.46606163507	-0.657132579819005	0.158576347014296	-4.14395079841109	3.41373016525781e-05	0.0008981335030875
LmxM.32.2390	3948.95594024973	-1.35629867126131	0.231267112413993	-5.86464135390502	4.501045121173031e-09	8.2624866917533e-07
LmxM.30.1050	2577.67761019523	-0.630243785973349	0.173877333843739	-3.62464601935835	0.0002893574997129	0.0044772806995815
LmxM.14.0440	501.287324600669	-0.70273189354742	0.148518027420351	-4.73162689912703	2.22727510850181e-06	0.0001077227607866
LmxM.34.1220	1770.59878110322	-0.65132820646156	0.130921190579815	-4.97496397318875	6.52597758923376e-07	3.93360604389859e-05
LmxM.36.3360	375.942797811859	-0.900085392131513	0.181978740188343	-4.94610189739719	7.571433638517e-07	4.43148329697839e-05
LmxM.28.2200	1045.931648959	-0.646622469638826	0.167537553617298	-3.85956733686043	0.0001135879554541	0.0022765506605529
LmxM.30.2760	1665.93520944974	-0.870594082747802	0.166765724174113	-5.22046174092017	1.78477576827709e-07	1.45612463438122e-05
LmxM.36.6760	3256.03890640158	-0.603260145670329	0.127286147729364	-4.73940139152439	2.14350516936038e-06	0.0001049278257752
LmxM.23.0080	2191.11061020381	-0.662638792946637	0.166818175790453	-3.97222179062193	7.12053751060278e-05	0.0015887453445618
LmxM.23.0680	681.350638863885	-0.694835042279931	0.173790623025448	-3.99811583722895	6.38487044338312e-05	0.0014609234722721
LmxM.16.1320	1283.66081089565	-0.738054639685381	0.207098299993468	-3.56378898189246	0.0003655398519258	0.0052349398075377
LmxM.33.2700	2109.51155435523	-0.720157323908622	0.183344480875821	-3.92789202308404	8.56936665241034e-05	0.001816660746759
LmxM.23.0660	616.68594414698	-0.658089159103902	0.222914266192991	-2.95220745779525	0.003155108752575	0.024247205893957
LmxM.05.0700	2528.26464745436	-0.62069560523088	0.149942825939652	-4.13954853352365	3.47989976668417e-05	0.0009096165183012
LmxM.15.1490	985.437218084273	-0.742037810260261	0.177254664186699	-4.18628087257939	2.83562424807272e-05	0.000781565303219
LmxM.01.0320	865.308707333187	-0.619524955563154	0.189209578849668	-3.27427902609193	0.0010593195420219	0.011258057816988
LmxM.22.1290	1166.30545613131	-0.783736446240305	0.18333789827716	-4.2748196287027	1.91292095614288e-05	0.0005786765004781
LmxM.34.3860	2298.63701560037	-0.810655236516765	0.147413113114126	-5.4992070881046	3.81502872803784e-08	4.33999817413544e-06
LmxM.08_29.2140	769.817427927942	-0.723069948353063	0.160451853076525	-4.50646056426787	6.59179294506276e-06	0.0002476367982198
LmxM.23.0690	1496.25413496864	-1.34501804136633	0.396932978441495	-3.38852681540185	0.0007026915764481	0.0083835153071958
LmxM.28.0550	861.351553119537	-0.782502736991618	0.139031539058897	-5.62823904768925	1.82058667381667e-08	2.49235229905378e-06
LmxM.30.2280	262.0319985479	-1.04852638378745	0.339785610364444	-3.08584693349089	0.0020297328064581	0.0177234074354191
LmxM.08_29.2390	171.797748147481	-1.00346436828464	0.373645192766853	-2.68560759701995	0.0072398059989326	0.0426831482141454
LmxM.31.2950	3470.87218541404	-0.746065274958303	0.197978202983114	-3.76842128939788	0.0001642832699511	0.002985962734475
LmxM.28.1500	1172.87994050179	-0.960697374000202	0.156014373732735	-6.15774912923057	7.378611565600711e-10	2.29219406212911e-07
LmxM.32.0420	481.993763865105	-0.810088598492087	0.23879329225149	-3.39242610566684	0.0006927661497903	0.0083142231676919
LmxM.03.0960	4608.02031729393	-0.789236961838664	0.195365513046117	-4.03979673552905	5.34975450057465e-05	0.0012975966096438
LmxM.24.0761	1340.25986646064	-1.21356171421919	0.224803420568987	-5.39832406085111	6.72662874101284e-08	6.79137254264509e-06
LmxM.12.0640	336.806443305479	-1.0309371532984	0.278666834572953	-3.69953301001274	0.000215996546157	0.0036087542048859
LmxM.25.0130	860.955700118083	-0.687324993297566	0.223808465193505	-3.07104109178043	0.0021331379178462	0.0182514353415719
LmxM.22.0275	412.512000847814	-0.64762368026701	0.234617214689544	-2.76034169582984	0.0057740934092608	0.036783061384831
LmxM.21.1660	1410.37190503186	-0.659930423946809	0.150070767336436	-4.39746151538856	1.09524296760226e-05	0.0003670654543287
LmxM.25.1620	3103.24658527797	-1.1733738231826	0.196766043211328	-5.96329429627442	2.4720260263019303e-09	5.47507076777619e-07
LmxM.29.0090	1411.170168538	-0.814850363543838	0.15954704133489	-5.10727342059238	3.26840648148129e-07	2.21839656730457e-05
LmxM.25.1780	1087.58178487963	-0.719346355495583	0.178973863031944	-4.01928160519836	5.83758646520304e-05	0.0013706449383559
LmxM.23.0510	715.48246333195	-0.857214030298177	0.198943056687495	-4.30884115571177	1.64112178505736e-05	0.0005061601957246
LmxM.17.0250	835.842199142198	-0.858199720486734	0.21247543567845	-4.03905382166384	5.36672507629629e-05	0.0012978155221929
LmxM.26.1100	2242.11342221078	-0.984499347461371	0.129709945363359	-7.59000664678004	3.19889078868584e-14	4.30624015003593e-11
LmxM.07.0640	1757.90938852	-0.756308723381651	0.229758891604763	-3.29174952968816	0.0009956624430386	0.0108236413895328
LmxM.29.0870	1641.44654337191	-0.865374190891843	0.249319648492667	-3.47094260770746	0.0005186348357137	0.0067564734968708
LmxM.28.2170	2048.72619152862	-0.789890486736309	0.180154743936246	-4.3845111678871	1.16246519442886e-05	0.0003849244195706
LmxM.22.0450	935.452202830558	-0.733635523355345	0.247437495112424	-2.96493271168145	0.0030274914096619	0.0236033282971424
LmxM.07.0100	1047.00779184832	-0.694038477811734	0.208447480389323	-3.32956040780853	0.0008698319348249	0.0098536220723433
LmxM.04.0090	1061.71955888669	-0.607376999762557	0.178651270093654	-3.39979110948472	0.0006743735119992	0.0081785508354621
LmxM.03.0690	5798.41334515873	-0.918160595700377	0.204859760762539	-4.48189821311299	7.39820300541322e-06	0.0002691679534897
LmxM.32.1690	893.206502393075	-0.925700175409338	0.19673548890404	-4.70530345371931	2.53488617935264e-06	0.0001139877300988
LmxM.33.2970	485.546543409231	-0.690913965775498	0.188550367794174	-3.66434695332822	0.0002479704613394	0.0040057148324767
LmxM.34.0020	333.842813501897	-0.761912169248226	0.214145449060118	-3.55791903396616	0.0003738044890424	0.0053061842847021
LmxM.18.0740	2182.79483345509	-1.02549588421858	0.183205495423921	-5.5975170496151	2.17443474270777e-08	2.8327273252985e-06
LmxM.32.3240	2330.99408143408	-1.3356876637356	0.236968357911775	-5.63656547020041	1.73475102285544e-08	2.47361657066983e-06
LmxM.07.0025	5760.36305990161	-0.651583544056308	0.203058488463755	-3.20884661845896	0.001332685654806	0.0132726288950287
LmxM.23.1220	2832.84332976781	-0.879393640989247	0.200715018330689	-4.38130463929909	1.17970791369954e-05	0.0003889184007735
LmxM.32.1070	925.510281078421	-0.999279933337485	0.259001363976535	-3.85820336231132	0.0001142235908434	0.0022779850450431
LmxM.17.0280	932.132921211065	-0.764722468442719	0.180090840883635	-4.24631516345043	2.17314896074871e-05	0.0006382736056715
LmxM.36.4920	375.211999443683	-0.81840374809041	0.288305226223911	-2.83867121942077	0.0045301807737072	0.0311631753567568
LmxM.16.0760	3199.84876159403	-0.792298889583049	0.17326093816536	-4.5728650552895	4.81100006284559e-06	0.0001897473685828
LmxM.32.3060	1318.3808445545	-0.799547701548688	0.202855376088061	-3.94146665948651	8.09848931955918e-05	0.0017486902152129
LmxM.19.0210	942.003856063555	-0.813830629130904	0.220393482518965	-3.69262566129138	0.0002219506085705	0.0036811870284707
LmxM.11.0480	1110.11782442002	-0.742441720098283	0.169783311430478	-4.37287807525354	1.22619211809311e-05	0.0003993529732999
LmxM.23.0040	9979.23771413553	-0.719389633752331	0.16917009460808	-4.25246338851413	2.11431790931716e-05	0.0006301603599097
LmxM.08_29.0970	1087.09663544736	-0.689002337430778	0.219936525031942	-3.13273267062264	0.0017318710119765	0.0158842808892558
LmxM.11.0580	398.036998568254	-0.643635971730092	0.237675906639878	-2.70804046076625	0.0067681770540072	0.0410718001992609
LmxM.24.2110	2339.02028085752	-1.46728938978952	0.24560651052134	-5.97414696652364	2.3129722165301e-09	5.47507076777619e-07
LmxM.33.4210	1470.10346291595	-0.628204955140301	0.190035777474251	-3.30571939394633	0.0009473290731981	0.0104312824259289
LmxM.03.0910	1127.4186994658	-0.620973129873521	0.107961434338633	-5.7518051114972	8.8295551752414e-09	1.32067253982268e-06

## Sheet: T7-vs-DAC3_up
Supplementary Table 4. List of DE genes in DACs mutants compared to parental cells.
T7-vs-DAC3_up
	baseMean	log2FoldChange	lfcSE	stat	pvalue	padj
LmxM.15.1000	21913.4834447452	0.717303865870013	0.219306560791176	3.27078160946143	0.0010725069986832	0.0113586901177809
LmxM.34.0800	1723.09255849006	0.801488988501621	0.133352002009703	6.010325877547	1.8515077292657301e-09	4.56036313993082e-07
LmxM.27.0690	1409.33192935094	0.608020344733177	0.102197654095479	5.94945500573948	2.6903678444698603e-09	5.71844765257449e-07
LmxM.24.1860	1897.2812544663	0.778585298969974	0.208417805718469	3.73569473244378	0.0001871976502184	0.0032911286489184
LmxM.14.0510	495.25017961545	0.759272302226569	0.258121095260498	2.94153525677669	0.0032658966255485	0.0247686826709445
LmxM.15.0010	32369.7309273779	1.19652009296576	0.23643878519267	5.06059144226583	4.17957949193501e-07	2.65814673672118e-05
LmxM.33.1560a	71.7797521828	1.16168825236872	0.407739202166389	2.84909630027349	0.0043843607531242	0.0304492534849394
LmxM.34.2610	171.649411264605	0.825582115813458	0.301873647364694	2.73485984291988	0.0062406842180198	0.0390139368645093
LmxM.27.2430	602.214131852091	0.715299034001445	0.166043657621755	4.30789735812064	1.64813831218992e-05	0.0005061601957246
LmxM.10.1228	462.843527718307	0.607133295484638	0.217312022837652	2.79383205566225	0.0052087522071265	0.034204139493464
LmxM.17.0237	694.874202591421	0.737494021662217	0.183062797707256	4.02863952096687	5.61005629875934e-05	0.0013366496969049
LmxM.31:ncRNA:rfamscan:482645-482735	333.866422802393	1.41297164163453	0.364088265163786	3.88084916990911	0.0001040923838788	0.0021071533448359
LmxM.31.3410	1114.70130642244	0.610163035193072	0.136134499879676	4.48206028400129	7.39258526918373e-06	0.0002691679534897
LmxM.27.2337	1172.92270270768	0.669829257669712	0.141417506995835	4.736537023591	2.174010399257e-06	0.0001057800120168
LmxM.27.1790	1232.93431711977	0.634835875215225	0.137243405447408	4.62562024853353	3.73479046201894e-06	0.0001546969362139
LmxM.01.0760	897.588196258458	0.616563858520065	0.160711998424285	3.836451942389	0.000124824608441	0.0024411824754928
LmxM.27.1700	1051.08438731801	0.830975564471391	0.149526812604459	5.55736827393999	2.73872523830954e-08	3.45635683591033e-06
LmxM.07.0730	1472.09066639726	0.671293705888956	0.146547092549578	4.58073711467085	4.63339961956555e-06	0.0001877733051058
LmxM.23.1665	6298.85144804699	1.29211928072606	0.197445164132104	6.54419309992086	5.98174668231675e-11	2.83420730326055e-08
LmxM.10.0250	1508.16551043716	0.610192252102454	0.15392595402788	3.96419340686322	7.36445284498448e-05	0.001620487794046
LmxM.33.2900	3662.21178866111	0.661023728757315	0.181157043194607	3.64889886200679	0.0002633667555333	0.0041816218968327
LmxM.21.1855	1427.91116057518	1.04387853614777	0.224238845364557	4.6552083090273	3.23653314645378e-06	0.0001382478287772
LmxM.27.0850	2081.20526981874	0.64159445721459	0.11833329230075	5.42192687062188	5.8960003863003e-08	6.10538398976251e-06
LmxM.12.0420	320.930802561253	0.708540683812729	0.190627901776009	3.71687815483211	0.0002016996556536	0.0034153629323156
LmxM.34.3300	2683.03455590753	0.600414400749784	0.14281410992802	4.2041672286611	2.6204515071915e-05	0.0007478935273351
LmxM.18.1400	19122.801945659	0.618813418294348	0.207609281961354	2.980663544752	0.0028762461045491	0.0226405818345645
LmxM.34.0610	3880.21573825452	0.685165754384593	0.15667255726266	4.37323400061645	1.22419383086509e-05	0.0003993529732999
LmxM.13.0390	1010.90626318519	0.995962487762169	0.193543479492784	5.14593666690435	2.66189225316433e-07	1.94227951324068e-05
LmxM.06.0010	19851.1201092303	1.09123368705822	0.203119475866107	5.37237348809202	7.77069469121864e-08	7.65413427085037e-06
LmxM.10.0970	11998.4197961832	0.662781166449462	0.244211793947336	2.71396051655224	0.0066484089692434	0.0404666158587633
LmxM.36.2480	1718.52213410449	0.914271803283701	0.2144436396931	4.26345964185347	2.01285869449785e-05	0.0006043814005746
LmxM.34.2820	286.090482745511	0.71917683517269	0.251041066289192	2.86477764695367	0.0041730214807489	0.0295144435201481
LmxM.33.1070	1155.05755620726	0.612798259742857	0.170447285606814	3.59523624891543	0.0003240973318633	0.0048747377084918
LmxM.26.1260	3017.30296484913	0.953041461185291	0.248404271908976	3.83665487658972	0.0001247215522163	0.0024411824754928
LmxM.20.0200	979.14629958493	0.626353236398808	0.139319273613074	4.49581181522918	6.93050119905385e-06	0.0002567782485539
LmxM.33.1730	457.161148843004	0.677715357262487	0.185083271131216	3.66167808208889	0.0002505685937557	0.0040270076281357
LmxM.19.0850	1259.64138277333	1.03677981629277	0.236467831560385	4.38444336995586	1.16282726724339e-05	0.0003849244195706
LmxM.30.0450h	1326.95271333697	0.887844402092364	0.173759696955875	5.10961067293887	3.22823344780278e-07	2.20969843711043e-05
LmxM.29.2090	367.608875013761	0.911258059927249	0.292225769832026	3.11833573216711	0.001818754952464	0.0163223152789464
LmxM.27.1880	1541.57650625443	0.659138234203874	0.1489378329973	4.42559302051764	9.61777005607115e-06	0.0003319774732602
LmxM.29.3650	24715.2538687006	0.630806267935218	0.233429145674291	2.70234578511201	0.0068852116039402	0.0414455888801292
LmxM.08_29.2460	9671.14273555836	0.615598474643738	0.190074730737145	3.23871812026951	0.0012006817333328	0.0122139878591051
LmxM.24.2080	6784.97427179136	0.652762471799606	0.174090614218636	3.74955579730345	0.0001771480793399	0.0031515969974201
LmxM.30.0450b	2548.72863412576	1.02480946513648	0.176462370938934	5.80752406126927	6.340344233529241e-09	1.04881749701735e-06
LmxM.04:ncRNA:rfamscan:119913-119998	133.279037307794	1.50068248288857	0.399734080328097	3.75420199763009	0.0001738945908274	0.0031074040046759
LmxM.24.0650	1732.51306449422	0.896920837534784	0.24236862757242	3.70064742503352	0.0002150500984926	0.0036036507168569
LmxM.25.0860	751.713589815439	0.741264013201993	0.134162732718672	5.52511117044973	3.29277046515252e-08	4.00846220599978e-06
LmxM.33.1460	1063.59646502748	0.823687110422559	0.124530360748348	6.61434774197013	3.73193540178932e-11	2.00952281601682e-08
LmxM.26.2330	9579.83280061612	0.639363470072859	0.186096541915133	3.4356547601214	0.0005911237339855	0.0074364073360672
LmxM.23.1267	1213.25768310228	0.749165534267672	0.129012261544407	5.80693280855173	6.362765550804791e-09	1.04881749701735e-06
LmxM.30.2240	376.924416160594	0.703257118027751	0.23064999759325	3.04902287173634	0.0022958700186595	0.019116974931757
LmxM.08_29.0160	3143.76190334337	0.673499666350419	0.199824501748677	3.37045587731525	0.000750439226453	0.0088100256279959
LmxM.25.0840	396.632176576095	1.0788848429743	0.200539501085575	5.37991187339153	7.45223102050994e-08	7.43107036452577e-06
LmxM.11.1130	1061.99800810639	1.06539789017814	0.403341689184771	2.64142764992011	0.0082557437915346	0.0466631508776944
LmxM.01.0450	283.930682273126	0.974403338180509	0.242006351569766	4.02635439880018	5.66482895143243e-05	0.0013457301011976
LmxM.12.0270	1009.99203554659	0.621632232749469	0.154788615957178	4.01600743637014	5.9192388618676e-05	0.0013778009304698
LmxM.36.1210	1049.54044021884	0.605606437975692	0.171678197417829	3.52756754838107	0.0004193967364936	0.0058004579463347
LmxM.28.1600	781.645847475242	1.00101212329737	0.144081908189718	6.94752128059893	3.71760001722372e-12	2.502254611593e-09
LmxM.27.2450	692.246090090162	1.01566649334658	0.175958370297381	5.77219766033319	7.82442538441517e-09	1.21534391980618e-06
LmxM.04.0200	752.623528718456	0.627780654325033	0.240536034527399	2.60992352168142	0.0090562466504992	0.0493238733621596
LmxM.21.0915	54376.2160265441	0.953744307994965	0.227286757457603	4.19621591096381	2.7141152348087e-05	0.0007662797492892
LmxM.16.0910	1745.23870082066	0.699508163078753	0.110038017469078	6.35696806583529	2.05774749789449e-10	7.5547393365881e-08
LmxM.27.2240	689.267056805022	0.775865613246922	0.13399173447783	5.79039905909491	7.02193884081294e-09	1.13432400034492e-06
LmxM.36.1200	1238.98601505407	0.64888484641805	0.156505657522977	4.1460791685616	3.3821692637932e-05	0.0008927379458711
LmxM.31.0670	632.865952466017	0.629121989191182	0.133456639879877	4.71405536477952	2.42834635871564e-06	0.0001133742979152
LmxM.22.1210	1150.09714370733	0.640388984246297	0.162355978896266	3.94435110181844	8.00163523949068e-05	0.0017373442964883
LmxM.26.0180	8548.29272801894	0.793198349183451	0.174180207988518	4.55389483307849	5.26616901842967e-06	0.0002044944575089
LmxM.30.0454	371.202658945806	0.669523994832445	0.19998473830225	3.34787544547799	0.0008143360151891	0.0093828701778645
LmxM.13.1440	2248.02683861027	0.67194846276126	0.138223141886275	4.8613311316141	1.16599022504656e-06	6.36331287006831e-05
LmxM.27.2410	584.128248269597	0.729419949005798	0.205668192856379	3.54658607573395	0.0003902572307591	0.0054629248749426
LmxM.09.1340	35806.6211401278	0.844745456897238	0.222574560626578	3.79533696267518	0.0001474430624541	0.0027453325832106
LmxM.33.0070	855.274760984194	1.57382657298194	0.515704563772473	3.05179880796306	0.0022747451381634	0.0190394989439858
LmxM.24.0430	499.350154126929	0.681348707142011	0.164539015481026	4.14095529349136	3.45862372460598e-05	0.0009069903838844
LmxM.06.0800	1977.03472949108	0.710207299515706	0.150558938033783	4.71713807755702	2.39185369022226e-06	0.0001128662185738
LmxM.12.0990	619.102119325576	0.666428161290375	0.170124562385078	3.91729537432643	8.9548001065903e-05	0.0018801020755567
LmxM.31.2240	1184.87851130773	0.798123626012479	0.135513679544675	5.88961666965406	3.87092448212021e-09	7.27103652141509e-07
LmxM.14.0470	122.535180634537	0.898159107061035	0.340450822233054	2.63814638827985	0.0083360588270827	0.0468026303802079
LmxM.33.1150	1360.68112032453	0.668075933984423	0.171671941988471	3.8915848812923	9.9591535254209e-05	0.0020520429343067
LmxM.19.0870	576.666913738196	0.962184177580996	0.299939469216213	3.20792785322762	0.0013369503268164	0.0132987041745032
LmxM.27.0540	274.373926331745	0.898880924805769	0.329909977360359	2.72462485674971	0.0064374585019652	0.0397860417373185
LmxM.29.1930	511.031212843242	0.746079583403532	0.224337535889506	3.32570107113507	0.0008819646110963	0.0099214876933502
LmxM.04.0190	1792.55442936796	1.47737797517001	0.405856554234144	3.64014812562987	0.0002724812434	0.0042901189141167
LmxM.04:ncRNA:rfamscan:58404-58479	243.505042602278	0.889658682716571	0.311430688580331	2.85668277192629	0.0042809345537225	0.0301476768306194
LmxM.21.0350	648.142497890174	0.653544809938079	0.212904609611572	3.06966021604896	0.0021430242766939	0.0183166212517004
LmxM.27.2420	516.170198813077	0.702262588211557	0.183730231275748	3.82224843094864	0.000132240361813	0.0025491775712747
LmxM.31.3360	1854.22762689213	0.726736970949618	0.174210989117165	4.17159086595193	3.02480389561979e-05	0.0008198436598966
LmxM.16.1140	1526.0001668466	1.02641978261075	0.211305937431727	4.85750563891461	1.18873753153516e-06	6.44391479342917e-05
LmxM.04.0340	922.096745306218	0.627888229986752	0.193664836177829	3.24213854398536	0.0011863633378698	0.0121141045258842
LmxM.22.0030	13888.3884884814	0.627630375962859	0.20098761389537	3.12273161414608	0.0017918105938458	0.0161884274792988
LmxM.28.2690	217.318257441476	1.04521110199941	0.272402890444002	3.83700444696374	0.0001245442176831	0.0024411824754928
LmxM.27.1570	7243.61591114164	0.75685864517622	0.207458241822336	3.64824573141992	0.0002640370394186	0.0041816218968327
LmxM.18.1350	137.981045354592	1.44846709891724	0.36271642812829	3.9933870831043	6.51361045538119e-05	0.0014861703855399
LmxM.27.1840	1647.7953231807	0.611520771654231	0.127583803283898	4.79309094034047	1.64231132484939e-06	8.34273495019404e-05
LmxM.33.1380	1915.9730619777	0.640437647939427	0.19696964843391	3.25145347535266	0.0011481656535399	0.01192598518684
LmxM.34.2810b	536.302463624562	0.603069280353976	0.19207426821887	3.13977132880066	0.0016907975829882	0.0156791872305346
LmxM.24.0480	1910.00402956835	0.857502452956278	0.236154136585074	3.63111341328279	0.0002822011306599	0.0044002674369498
LmxM.15.1280	2842.32141018201	0.69392060729117	0.166503180303298	4.1676117298609	3.07807649754205e-05	0.0008314924371453
LmxM.27.1240	24665.0263369914	0.871555529753684	0.231295596619508	3.76814579478325	0.0001644646422144	0.002985962734475
LmxM.01.0410	5482.30782234506	0.61907625742371	0.17104846098885	3.61930328893204	0.0002953972639663	0.0045532895058319
LmxM.21.0210	1295.58167462588	0.710077234972097	0.123415557950937	5.75354717639717	8.739004624394441e-09	1.32067253982268e-06
LmxM.31.0900	374.918194442078	0.647171030025321	0.247279629144477	2.61716273299326	0.0088664059913334	0.0488499053151432
LmxM.19.0600	1739.61465982999	0.621542333491	0.163990927516571	3.79010194590303	0.0001505854687064	0.0027832467522709
LmxM.26.1090	1064.77136928954	0.77414642200364	0.139236889062303	5.55992328769455	2.69893253058323e-08	3.45635683591033e-06
LmxM.08_29.2850	564.282900048446	0.699281739955238	0.247329742623508	2.82732570914329	0.0046938559046262	0.0319395738345963
LmxM.32.2580	1627.00203414757	0.745943457803981	0.204910130494958	3.64034445735877	0.0002722735478848	0.0042901189141167
LmxM.24.1780	1829.42144291832	0.651174231490626	0.174720397082762	3.72695027233813	0.0001938106783276	0.0033315902758541
LmxM.19.1360	345.006801857262	0.832273710080704	0.315929933002213	2.63436168321182	0.0084295640943849	0.0471180548030084
LmxM.20.1540	365.674645409051	0.795876763021834	0.259407875263026	3.06805166271401	0.0021545936534309	0.0183200081171221
LmxM.28.2250	1974.20119595697	0.694526417235033	0.203247962163594	3.41713840494012	0.0006328309843953	0.0078036272686435
LmxM.02.0730	576.279151720399	0.682579746227346	0.182460225967477	3.74097830147933	0.0001833053477192	0.0032326578461313
LmxM.09.0180	514.864590881784	1.35853891537818	0.308325630537026	4.40618223341326	1.05208461323423e-05	0.0003555517749411
LmxM.33.1840	127.872389814744	0.788531599954359	0.301798839126918	2.61277214397353	0.0089811156988527	0.0492226304756029
LmxM.08_29.1740	21609.1952767723	0.784172733270116	0.193712048093239	4.0481360916316	5.16271264236499e-05	0.0012642832865646
LmxM.02.0500	453.154066933648	0.618236229404585	0.169991473015706	3.63686612296996	0.0002759752747198	0.0043366776146159
LmxM.09.0150	427.588159244897	1.56068098986123	0.386673267484252	4.03617503742948	5.43296890571453e-05	0.0013062356397334
LmxM.30.0900	16729.4544907314	0.660295321126629	0.195796796698489	3.37234996823482	0.0007452967969195	0.0087623904348163
LmxM.30.1855	487.296636607696	0.667859046679243	0.21657906696503	3.0836731178045	0.0020446211322115	0.0177956949190435
LmxM.25.1260	2180.46015034088	0.610519996670617	0.129412391344603	4.71763167597225	2.38605967013473e-06	0.0001128662185738
LmxM.23.0800	1302.16183120279	0.632844839308677	0.195167073211939	3.24257995415778	0.0011845270675508	0.0121106647146936
LmxM.06:ncRNA:rfamscan:100521-100638	660.692345742797	1.03821781584519	0.256009157665195	4.05539327309125	5.00500216230094e-05	0.0012400430203958
LmxM.33.1900a	174.679688647944	0.708273236877279	0.258387795721428	2.74112496257711	0.0061229215819139	0.0383966130567694
LmxM.04:ncRNA:rfamscan:50220-50294	589.539136032708	2.00620263304737	0.558631700468772	3.59127960580089	0.0003290583768297	0.0048998828044564
LmxM.30.0453	396.493567182973	0.700269451135331	0.233772725021658	2.99551391664897	0.0027398279877863	0.021888813706578
LmxM.29.0850	2468.75609604379	0.825653669896121	0.175886360078852	4.69424502005711	2.67593147412151e-06	0.0001187554863542
LmxM.31.1780	1136.68144754181	0.791273238402241	0.158051806939893	5.00641690672452	5.54525834139629e-07	3.3675978664254e-05
LmxM.10.0483	456.341230690915	0.810389594550895	0.258894421407745	3.13019334346557	0.0017469128445419	0.01595242404703
LmxM.33.3650	17776.1949117713	0.609567643187267	0.188124893554971	3.24022850813813	0.0011943394577007	0.0121801512624359
LmxM.34.0440	2819.68612793272	1.12625064551471	0.190734593079791	5.90480534930313	3.5306336360960602e-09	6.84640797417066e-07
LmxM.08_29.2270	396.971382516372	0.614183257947258	0.234449960491827	2.61967737874142	0.0088012987606904	0.048583447785768
LmxM.27.2490	1448.10011374705	0.643955381708219	0.159358458663219	4.04092375836243	5.32410667087381e-05	0.0012952653488146
LmxM.04.0390	504.948892357738	1.18485601308377	0.251742081797613	4.70662673726647	2.51849434686549e-06	0.0001139877300988
LmxM.31.3560	973.593335004461	0.627244072021393	0.107408407943496	5.83980420184021	5.22622069273824e-09	9.36320195454981e-07
LmxM.31.3620	869.788089151984	0.642527242702044	0.213904073122418	3.00381022821535	0.0026662157257724	0.0214065849076183
LmxM.24.1650	418.56373174797	0.600052166278518	0.199665603883051	3.0052856105851	0.002653315720187	0.0213792862438068
LmxM.29.0390	282.873477592449	0.997641162026937	0.345916416170702	2.88405266529653	0.0039259309058204	0.028236637512299
LmxM.23.1155	883.257529110919	0.922359614470379	0.195988126672244	4.70620149358775	2.52375081602577e-06	0.0001139877300988
LmxM.06.0410	1380.61201060502	0.699466774899409	0.215628886541862	3.24384541476365	0.0011792772859581	0.0121106647146936
LmxM.27.2340	398.285485689045	0.919581915031711	0.204046505933306	4.5067270856982	6.58352219926405e-06	0.0002476367982198
LmxM.33.2870	7014.63896971193	1.15355500808003	0.212912353193174	5.41798064217258	6.02759403326451e-08	6.1626426590731e-06
LmxM.31.2250	396.685773989674	0.703267962073976	0.266679128174343	2.63713162289255	0.0083610382364525	0.0468647507535234
LmxM.10.0330	1631.30154922269	0.749514233080748	0.216573296743765	3.46078784573116	0.0005385970881477	0.0069575445539016
LmxM.31.3900	26816.3467406041	0.790038589029968	0.212231047187855	3.72254012548253	0.000197228553113	0.0033607911888061
LmxM.08_29.0251	490.196283900239	1.95999368331312	0.312824736941195	6.26546897306769	3.71705010543042e-10	1.25094223756506e-07
LmxM.00:ncRNA:rfamscan:423026-423143	79.1617341529334	1.1041027806823	0.418131482280492	2.64056362046817	0.0082768250983896	0.046716922655271
LmxM.33.1980	172.524725933007	0.729034549802602	0.273548807052722	2.66509862593585	0.0076965746849829	0.044499093579533
LmxM.30.2720	440.236199820072	0.636474218532878	0.216866229710248	2.93487012423862	0.0033368732343224	0.0251887150594599
LmxM.27.1380	10171.6114714078	0.900862978360376	0.197340027908346	4.56502914238353	4.99424956846766e-06	0.0001956065641816
LmxM.30.0310	1628.9197903493	0.686440229535819	0.151148725704862	4.54148869819903	5.5858380933179e-06	0.0002148419727606
LmxM.08.0380	2839.88875347978	0.63583514120772	0.161132152204277	3.94604759205124	7.94518280233654e-05	0.0017297369675059
LmxM.27.1190	31465.3070205845	1.33336222430517	0.218660713129493	6.0978591225738	1.07498417669575e-09	3.01359095804779e-07
LmxM.04.0180	817.032034867281	1.19829785337978	0.254754276690188	4.70373988985885	2.55438642415441e-06	0.0001139877300988
LmxM.14.0720	310.204317498966	1.06341623459807	0.279868555929398	3.79969886601456	0.0001448720187706	0.0027212355711875
LmxM.27.1920	1117.27382469598	0.754608470285342	0.14419682244134	5.23318376583727	1.66614943776392e-07	1.39892824489992e-05
LmxM.27.0800	2292.17457012562	0.612810550669448	0.153175537876036	4.00070767935146	6.31533337485749e-05	0.0014502908446211
LmxM.34.0470	731.403735974215	0.812291380266825	0.219896933902021	3.69396410333196	0.0002207849833567	0.0036768666197377
LmxM.36.2340	1215.92467122879	0.63895336578192	0.17987421261751	3.5522232813917	0.0003819905671944	0.0053658048890951
LmxM.30.1200	558.498567369309	1.30152322463935	0.26309513999142	4.94696794734327	7.5378382616251e-07	4.43148329697839e-05
LmxM.16.0600	1259.30719491424	0.960435523588558	0.204848689656275	4.68851192165357	2.75198885881473e-06	0.0001205530756489
LmxM.19.0861	1288.82968626382	0.783229811894282	0.166385046443121	4.70733295231571	2.5097879804515e-06	0.0001139877300988
LmxM.01.0820	1176.61970385652	0.619358767373328	0.142108444270081	4.35835302085371	1.31044883945944e-05	0.0004200196538219
LmxM.31.0860	967.069790986075	0.838225184739695	0.18293694213355	4.58204436437865	4.60452174993385e-06	0.0001877733051058
LmxM.26.0170	4006.3031544836	0.634730859075	0.160392387474944	3.95736274687074	7.5781804818513e-05	0.0016542963176192
LmxM.30.2160	651.681788446041	1.11234023045483	0.241952518863701	4.59734924719444	4.27900023304745e-06	0.0001754390095549
LmxM.31:ncRNA:rfamscan:1306302-1306383	400.118993295076	0.970593577461087	0.370243862532239	2.62149808729529	0.0087544253562926	0.0484150610986958
LmxM.04.0130	4666.36175414611	1.62116972239791	0.232315834979394	6.97830056458142	2.98771948536175e-12	2.19380093484244e-09

## Sheet: T7-vs-DAC4_down
Supplementary Table 4. List of DE genes in DACs mutants compared to parental cells.
T7-vs-DAC4_down
	baseMean	log2FoldChange	lfcSE	stat	pvalue	padj
LmxM.31.0840	2566.68952343852	-1.02459472873963	0.143495342264606	-7.14026471221811	9.31513531102247e-13	2.2776473282737397e-11
LmxM.23.1410	1386.26472697502	-0.607360725765488	0.109928616004565	-5.52504659696859	3.29398175962495e-08	3.09139062634505e-07
LmxM.34.4760	591.153677814132	-0.866297186753649	0.248750896612828	-3.48258920289244	0.0004965897459627	0.0017056688231483
LmxM.32.1140	1232.52491010591	-1.13177231288485	0.0985050022623333	-11.4894907557159	1.48987593432027e-30	3.6416222407474597e-28
LmxM.25.0490	267.103930105524	-1.70614856638236	0.539651867589736	-3.16157261532808	0.0015691968805651	0.0046311541174272
LmxM.36.1750	1706.77945776197	-1.30931257052255	0.133108519624389	-9.83642951042673	7.844551743523171e-23	8.73501437386904e-21
LmxM.30.2600	5598.99268119437	-1.62739051920632	0.158995274154685	-10.2354647196812	1.3753328450590201e-24	1.77074103801349e-22
LmxM.19.1160	4184.73376280641	-0.81201317675365	0.188909264993568	-4.29842960207006	1.72012516440631e-05	8.66901000287951e-05
LmxM.09.1070	2966.38162242886	-0.732125946509227	0.1244775514671	-5.88159019743196	4.06343407830182e-09	4.72919446401229e-08
LmxM.31.1160	1064.78845922888	-0.836176050095012	0.123020541929279	-6.79704411134611	1.0678740936708e-11	2.06555927977639e-10
LmxM.26.0680	2320.35624886725	-0.624999753555894	0.147381809639874	-4.24068448530435	2.22839193042286e-05	0.0001092973184921
LmxM.04.0670	1950.79122325364	-0.734431975880919	0.105764912292442	-6.94400401761028	3.81139654648071e-12	8.178621755989849e-11
LmxM.09.0100	1469.96600544215	-0.987548444146881	0.154631777387695	-6.38645213054034	1.6977854629588101e-10	2.6051680102012303e-09
LmxM.02.0400	119.309083619243	-0.6982560650721	0.268524018901725	-2.60034863148555	0.0093129094372591	0.0216347261807203
LmxM.05.0490	988.569171970984	-1.17000291493442	0.0917950928305651	-12.7458111197078	3.28951555388939e-37	1.59444753906168e-34
LmxM.26.1900	854.913973823022	-0.668183558232785	0.160776649685982	-4.15597389010055	3.23904816203039e-05	0.0001526873961963
LmxM.24.0770	1950.40857107034	-1.40754485644069	0.193349586413177	-7.27979243479143	3.34334180299094e-13	8.773610336511249e-12
LmxM.02.0200	166.414539410348	-1.01709431909898	0.437395244834408	-2.3253437962821	0.020053584194953	0.0416320542794394
LmxM.22.0470	1531.55430184937	-0.791880611740049	0.118452415919677	-6.68522128140488	2.3057596821116e-11	4.07713729197416e-10
LmxM.29.1410	149.294920280004	-1.0249696527176	0.450666612526399	-2.27434121860438	0.022945478708881	0.0466841344595504
LmxM.25.0820	1832.27957438637	-0.84894879289251	0.123156575688801	-6.89324778757801	5.45327629232852e-12	1.13292812349824e-10
LmxM.36.0020	8625.19462078408	-0.750037391992269	0.319172497361417	-2.34994367682927	0.0187762519978951	0.0392481776922008
LmxM.27:rRNA:rfamscan:982402-983034	16264.3098399144	-1.44393930865649	0.387482814963612	-3.72646025293301	0.0001941876774994	0.0007438895688494
LmxM.05.1080	2061.64759597698	-0.741431124263283	0.0802095851565459	-9.24367234684263	2.3817912052335602e-20	1.92411367952202e-18
LmxM.08_29.0620	1676.74899384192	-1.13364534441732	0.398872691238643	-2.84212323710842	0.0044814164913691	0.0115252409141328
LmxM.28.0630	369.915113210949	-0.764202330194316	0.24348943447812	-3.13854410903807	0.0016978937880666	0.0049629814876441
LmxM.22.0210	2185.73719453493	-0.960502432324934	0.122244424632468	-7.85722895103575	3.9272462712454204e-15	1.49126770852821e-13
LmxM.20.1365	392.771206901249	-0.626377328433634	0.146762472445814	-4.26796658570125	1.9726286630895e-05	9.80365511692247e-05
LmxM.29.1220	818.278666920919	-0.727977398404789	0.179740899489378	-4.05014885578565	5.11850629858234e-05	0.0002295944033768
LmxM.12.1120	1524.87532096764	-0.631990004396464	0.187836678289812	-3.36457187249324	0.0007666251446317	0.0024948622400339
LmxM.29.3040	4003.56497088241	-1.12422533004179	0.178737619541792	-6.28980811607447	3.178586211613e-10	4.681107767666111e-09
LmxM.36.6920	646.316316775367	-1.05743047880199	0.120027476725929	-8.80990342916671	1.25253716522924e-18	8.1911954297531e-17
LmxM.26.0330	661.71781594645	-1.08363593484261	0.189945093548578	-5.70499566268328	1.16346051365697e-08	1.2119993214328e-07
LmxM.24.2230	3196.53303743852	-1.35683832454086	0.215724749014566	-6.2896739050059	3.18133537608376e-10	4.681107767666111e-09
LmxM.25.1130	1688.49518665423	-0.867275594252402	0.148712323347622	-5.83190131610753	5.479932694141081e-09	6.14348917003028e-08
LmxM.29.3600	2776.97878317401	-0.885179103377004	0.0998796821218645	-8.86245415055471	7.82720059161354e-19	5.2435880386093904e-17
LmxM.33.3950	339.47859406656	-0.673772743463734	0.222097826707772	-3.03367553591715	0.0024159411461308	0.0067865183045013
LmxM.27.2330	3326.58207051581	-1.17798914697331	0.201462227124336	-5.84719609123695	4.99928054034427e-09	5.67716939931822e-08
LmxM.21.1558	923.019387206453	-0.723427810397368	0.0865346910668753	-8.35997449668241	6.27318162630396e-17	3.0228664678798002e-15
LmxM.27.1710	1687.30072531847	-1.51040581496925	0.197058678300223	-7.66475157550843	1.7917767103876802e-14	5.81269295023403e-13
LmxM.19.1190	370.122152959006	-1.10705279917337	0.135691650407708	-8.15859189454217	3.3895278842123897e-16	1.49356736716097e-14
LmxM.05.0510	74.4479121351307	-2.4673458905022	0.437300909725911	-5.64221531587635	1.67875970794933e-08	1.68694877969543e-07
LmxM.29.3240	2790.04105545046	-0.858813795038383	0.108159893026775	-7.94022415338176	2.01816201674931e-15	7.99502645096842e-14
LmxM.22.1250	1319.90720537498	-0.899739151800404	0.14044593337809	-6.40630262592399	1.49090896680554e-10	2.3135762498074702e-09
LmxM.36.5365	476.230678772349	-0.802159458662771	0.207841308929627	-3.85948040259106	0.000113628368554	0.0004635137410324
LmxM.36.0830	984.103206338725	-0.730003815853491	0.143430421171224	-5.08960240019116	3.58815056604342e-07	2.7075421853661e-06
LmxM.18.0510	1709.56684689404	-1.23651775869383	0.407388223895693	-3.03523196343159	0.0024035075382962	0.0067547415128108
LmxM.22.0230	393.166339187253	-2.23129203452099	0.943500858838442	-2.36490726385556	0.0180345861970136	0.0378804461543187
LmxM.20.0560	1093.62178367037	-1.33796340484337	0.178280594669619	-7.50481793782897	6.15140354555262e-14	1.87038986034515e-12
LmxM.30.2630	453.734127498648	-0.787310760147815	0.173472741856814	-4.53852721597996	5.66484854468608e-06	3.22364309448987e-05
LmxM.30.3060	482.113692871771	-1.01564598957124	0.295680363655923	-3.43494568598787	0.0005926726032286	0.0019916893354828
LmxM.17.0980	3003.68765812121	-0.787958090862042	0.109821000853619	-7.1749308851439	7.23437239223774e-13	1.81741550341582e-11
LmxM.11.0700	1053.54723550401	-0.62920423731051	0.103698317964147	-6.06764169046651	1.2980208932431e-09	1.679072552641e-08
LmxM.36.2660	2302.76605589054	-1.1343401551688	0.183814862350691	-6.17110140421973	6.781590880586381e-10	9.25170676424366e-09
LmxM.34.2350	1721.06131954385	-0.643150160996195	0.119254559796782	-5.3930865376734	6.92575764960305e-08	6.11009026046351e-07
LmxM.21.1800	723.999559206855	-0.88165072069901	0.112263524507404	-7.85340318298009	4.048973906789331e-15	1.5304378436671599e-13
LmxM.09:tRNA:rfamscan:391428-391499	10.040799331266	-2.03253856794387	0.836019608835189	-2.43120920426229	0.0150485227173768	0.0325206883682345
LmxM.01.0490	2338.8793585069	-0.602453089667085	0.111789719406599	-5.38916362671827	7.07863355697709e-08	6.23161757580034e-07
LmxM.26.0700	323.518254232456	-1.07800005017316	0.144157787469603	-7.47791755891415	7.55095390762905e-14	2.23010251608829e-12
LmxM.24.1500a	152.111459691044	-1.22991705986255	0.273008299181965	-4.50505374213107	6.63561470044499e-06	3.74246852372805e-05
LmxM.33.0170	1586.49148597591	-0.898540069402976	0.139419741073003	-6.44485538767773	1.1571069242905801e-10	1.8265442636311102e-09
LmxM.11.0630	1444.9765223002	-1.07732986304145	0.183917713874599	-5.85767319713427	4.693971834851121e-09	5.36453923982985e-08
LmxM.34.4880	1070.69532764134	-0.645289427919064	0.116304086915215	-5.54829537838578	2.88468230717438e-08	2.74477854631834e-07
LmxM.11.0330	717.205919739776	-0.845103253839042	0.21046392366804	-4.01543047905923	5.93373885170675e-05	0.0002599362474112
LmxM.30.0200	980.320055676547	-0.763988659781756	0.144657765452405	-5.28135255921065	1.28233656521956e-07	1.05982480415338e-06
LmxM.21.1090	5123.24775624304	-1.40563667227496	0.191012321774278	-7.35887956974848	1.85460249575354e-13	5.11101156020373e-12
LmxM.36.0210	683.783484534011	-0.702374347459487	0.133981440536207	-5.24232568815888	1.58565164700897e-07	1.28347441761826e-06
LmxM.33.0961	445.816628447638	-0.643591747766675	0.198032785473191	-3.24992523954475	0.0011543535067541	0.0035571701180458
LmxM.28.1490	1784.48470540665	-0.906837646892931	0.13433435309296	-6.75060121267265	1.4723376874342198e-11	2.73244651902206e-10
LmxM.25.0010	118.280633452222	-1.49369694192644	0.474535129096852	-3.14770572364007	0.0016455726588795	0.0048220194556073
LmxM.24.1630	4823.73890059359	-0.801493567786921	0.0978778796744983	-8.18870995624711	2.64040997582947e-16	1.1760528757208e-14
LmxM.24.0090	601.619144721531	-0.990773945721547	0.114637695238684	-8.64265409086152	5.49220080528129e-18	3.20764539913688e-16
LmxM.36.0700	809.108017078736	-0.64159749858298	0.112899544450971	-5.68290600022403	1.32425062035814e-08	1.36397813896888e-07
LmxM.28.0130	557.848013371765	-0.840770404806275	0.17064068412859	-4.92713920540014	8.34423083162558e-07	5.84167052273533e-06
LmxM.18.1510	1837.14722650404	-1.27714461792669	0.216493258117085	-5.89923505717658	3.65190667033047e-09	4.32974258467957e-08
LmxM.09.1010	1186.3081290556	-1.08233778982128	0.472494745544474	-2.29068746272313	0.0219814962571674	0.0449782789071416
LmxM.05.0030	3254.66555175485	-1.15480953079081	0.110257143815743	-10.4737841996041	1.13992908643406e-25	1.5655026120360998e-23
LmxM.33.2500	15.9274698998912	-2.19440105236917	0.734483581028184	-2.98767883864373	0.0028110477720432	0.0077364841822431
LmxM.32.2060	1352.59125241824	-0.800975489732259	0.116811955347332	-6.85696500285966	7.03388536600555e-12	1.4240593468276601e-10
LmxM.33.3980	1305.38780656928	-1.10846442772563	0.100493228758457	-11.0302399616386	2.73135292186219e-28	5.48935318930352e-26
LmxM.17.0140	1070.09242447466	-0.691767977618488	0.101764279757483	-6.79774847586065	1.0626676962735698e-11	2.060325133481e-10
LmxM.31.0890	1325.90373695622	-0.897282044963175	0.0832090841937205	-10.7834625709159	4.12076043689817e-27	7.07397208334186e-25
LmxM.25.2140	285.073213964441	-1.81450745552038	0.369503235978504	-4.91066729284596	9.0766980485967e-07	6.29562221552498e-06
LmxM.29.3150	1284.96377417333	-0.64124731986905	0.0932127771414896	-6.87939292802838	6.01081561033561e-12	1.23822801572914e-10
LmxM.36.1630	1038.49526981261	-1.00704649771641	0.443131642782916	-2.27256733776005	0.0230522657956941	0.0468782502854194
LmxM.36.0550	1403.16772020602	-0.617683531564406	0.1686931081076	-3.66158130876587	0.0002506632800522	0.0009358701529815
LmxM.33.1330	696.433856557129	-0.78683634599103	0.113218141606767	-6.94973733735975	3.6596695074841694e-12	7.873544841166989e-11
LmxM.19.0020	4878.94981544702	-0.650458954195372	0.102120403919466	-6.36952978278796	1.8960860008607802e-10	2.8932867864986702e-09
LmxM.18.0140	1106.62840438227	-0.666079697011228	0.175681895715366	-3.79139634336819	0.0001498026697449	0.0005934490378358
LmxM.14.1360	2705.93046585644	-1.50697161606558	0.160426944525094	-9.39350693567473	5.80350529555181e-21	5.03377722477336e-19
LmxM.05.0740	1260.54268488736	-0.67100277842514	0.0992436647000364	-6.76116486078223	1.3688665085752199e-11	2.55770068722444e-10
LmxM.13.0680	1548.60631713073	-0.729006276398443	0.109195433467169	-6.6761608361363	2.4528277697468096e-11	4.30944580441657e-10
LmxM.36.6090	1010.27927979871	-1.21124680745603	0.117988656440983	-10.2657903224949	1.00494689568767e-24	1.31440673340737e-22
LmxM.31.0950	991.265134858358	-0.808294454932083	0.230601674365857	-3.50515431926005	0.0004563426871407	0.0015819367867225
LmxM.36.0890	1220.90644084428	-0.644651248096644	0.178458891306503	-3.61232350698322	0.0003034656450076	0.0011049743326836
LmxM.29.0650	1133.50896489705	-0.62071492565459	0.12081482359718	-5.13773812826293	2.78064998537647e-07	2.14537040070244e-06
LmxM.25.0540	187.028364591831	-1.64164578322405	0.584751445924177	-2.80742492330137	0.0049939319082384	0.0126693346440531
LmxM.34.1300	2021.19902312321	-1.22025188116274	0.38400141280216	-3.17772758245404	0.0014843414502231	0.0044123281204323
LmxM.36.5810	877.871582111914	-0.656189699617787	0.160397579092598	-4.0910199725581	4.29480138650313e-05	0.000195955719833
LmxM.14.0705	488.021012886341	-1.34300384275077	0.279052428064029	-4.8127294647392	1.48882771912614e-06	9.83796343672768e-06
LmxM.33.2580	593.024075114753	-2.17246759892357	0.854125749051146	-2.54349854378817	0.0109748514435924	0.0249194753086804
LmxM.32.0765	378.827138172004	-0.664278878541771	0.232404395020965	-2.85828879648273	0.0042593254628737	0.0110159578826365
LmxM.36.3470	2279.25402663557	-0.694696140287224	0.184883522562675	-3.75748001043047	0.0001716330726316	0.0006671021313607
LmxM.32.2200	216.968290552556	-0.828990837230306	0.319088746981767	-2.59799458637028	0.0093769972298763	0.0217529440242627
LmxM.08_29.1240	3241.28658031415	-0.852659408495752	0.100456082334443	-8.48788235297727	2.10436441525173e-17	1.09056369696064e-15
LmxM.25.0430	1482.29627361906	-0.618084421697615	0.113087662329576	-5.46553363085979	4.61516276480646e-08	4.23484868396495e-07
LmxM.11.0410	1894.84208313995	-0.647183688641687	0.086530575518155	-7.4792486328246	7.47487374838927e-14	2.22357255186742e-12
LmxM.19.1060	1031.44588248336	-0.85210565249842	0.205263728569255	-4.15127240666353	3.30631951842569e-05	0.0001554139921952
LmxM.20.0630	745.075426775532	-0.703036506868172	0.141380758540162	-4.97264630723043	6.60450921752719e-07	4.70364355682144e-06
LmxM.11.0240	2678.97811192225	-0.702045767218548	0.135863935770309	-5.16727094087295	2.37536803992554e-07	1.85526375819777e-06
LmxM.34.2550	958.9215026201	-0.858271123494567	0.129860354911308	-6.60918510565254	3.86441277312933e-11	6.565517783625911e-10
LmxM.14.0120	652.877522522675	-0.705087545799733	0.16722700029384	-4.21634989900436	2.48288418175608e-05	0.0001203468568098
LmxM.32.3190	874.626875185515	-0.619204495225984	0.133147139785372	-4.65052795143868	3.31086366750729e-06	1.98989909702845e-05
LmxM.26:ncRNA:rfamscan:160631-160741	2629.70343419294	-0.664618529473846	0.198435864334045	-3.34928633845662	0.0008102001745738	0.0026160068332636
LmxM.34.3360	1238.23537504893	-0.778959346248716	0.121274429400272	-6.42311285322746	1.33515431503715e-10	2.09157253914565e-09
LmxM.12.1130	1902.0371328958	-1.60017752770693	0.18250286056833	-8.76795861020391	1.8193468493512e-18	1.17120453426983e-16
LmxM.12.0260	1383.38727290639	-0.662211098889645	0.0837150055877382	-7.91030346639121	2.5676222431905303e-15	9.93296116614551e-14
LmxM.29.2980	6140.27487220501	-0.663690989431674	0.23907934921764	-2.77602809110669	0.0055027453827094	0.0137861422783599
LmxM.24.2290	1962.41839099203	-0.864100848062315	0.235377710424446	-3.67112436646665	0.0002414857921218	0.0009044740577654
LmxM.32.1930	1757.87050749242	-0.605585662198215	0.110567477630559	-5.47706862068129	4.32429556462266e-08	3.98125088854645e-07
LmxM.17.0770	38.4217663266658	-1.2068377709491	0.433913312209249	-2.78128772958022	0.0054143725964042	0.0135915217216801
LmxM.32.2290	247.103624609771	-1.37276550749687	0.333248987405635	-4.11933887086632	3.79961012746504e-05	0.0001762882176256
LmxM.21.1770	5032.63101264854	-0.694803790237071	0.140767804898526	-4.93581462563778	7.98168934680108e-07	5.60691561957723e-06
LmxM.31.1960	1844.61525716965	-1.1148462251534	0.200735130954228	-5.55381721103722	2.79497752487888e-08	2.67176505858491e-07
LmxM.17:tRNA:rfamscan:331056-331128	11.8668821292846	-2.17349600242004	0.76528329488421	-2.84011949163074	0.0045096637940832	0.0115942682256618
LmxM.34.4700	1618.47267282871	-0.672368938923112	0.122900831690339	-5.47082497063334	4.47945522150873e-08	4.11949899835178e-07
LmxM.08_29.0880	4023.17979338512	-0.689998005465877	0.169018698072629	-4.08237676265485	4.45774516777917e-05	0.0002027142394177
LmxM.18.0300	2074.7478263515	-0.745459749781611	0.117183623327933	-6.36146697474507	1.99835879592125e-10	3.0213718308974504e-09
LmxM.24.2220	1215.7386109177	-0.801821117685453	0.131780240015602	-6.08453223025334	1.16831899502432e-09	1.53539848787885e-08
LmxM.23.0110	670.974774896161	-1.04108166132868	0.457156072345803	-2.27730030137537	0.0227682989629567	0.0464007809856709
LmxM.08_29.2440	269.358411641266	-1.25792827922795	0.513957786263045	-2.44753229321471	0.0143838234788251	0.0312724816531712
LmxM.24.0440	280.287452238173	-0.882250524688423	0.339571722713818	-2.59812718690938	0.009373376811439	0.0217506688049162
LmxM.33.3440	1175.96484963306	-1.19537400795236	0.103531448062512	-11.5459991173947	7.733752281738381e-31	2.1242039600508097e-28
LmxM.21.1040	1602.98687692035	-1.19415516502329	0.453535616287018	-2.63299093200119	0.008463660700876	0.0199088107836764
LmxM.14.0190	5151.212229631	-0.648639359945561	0.0747181743207374	-8.68114572983532	3.91801750496448e-18	2.3914417956227697e-16
LmxM.18.1380	2427.47306631346	-1.33712676174041	0.181719501944434	-7.35819076892074	1.86419510434594e-13	5.1203225532701895e-12
LmxM.07.1090	1159.51342719101	-1.00568147032621	0.103402582297859	-9.72588351255355	2.33866233183476e-22	2.4088222017898003e-20
LmxM.31.3310	4174.67381670938	-1.3112188412774	0.176734356918222	-7.41915077600969	1.17873665275584e-13	3.3608269960927698e-12
LmxM.28.0180	720.178073378309	-0.663048858070128	0.170641257283066	-3.88563040748251	0.0001020646859416	0.0004215604070972
LmxM.28.1950	460.833050053127	-1.24913351459405	0.25801234822271	-4.84137105529474	1.28946336518742e-06	8.6173383042533e-06
LmxM.24.0530	448.939313927187	-0.712487451320427	0.151189519748967	-4.71254523794661	2.44641747717075e-06	1.51226406690825e-05
LmxM.26.2640	615.886438535896	-1.20319914108003	0.201054091034009	-5.98445490411087	2.17115730966881e-09	2.71065700479863e-08
LmxM.36.0480	3127.5724673709	-0.85930640663937	0.139019688104711	-6.18118496994564	6.362221734961411e-10	8.737451182680331e-09
LmxM.36.2800	580.00700543091	-0.614706644884535	0.189144161481316	-3.24993719113691	0.001154304995201	0.0035571701180458
LmxM.31.3710	604.019653567674	-0.790995466372402	0.145550297156163	-5.43451632753269	5.49452661124141e-08	4.9589155834205e-07
LmxM.36.6995	2473.58245484444	-0.917624674005697	0.205086357662101	-4.47433307834922	7.66501784507259e-06	4.21908797885091e-05
LmxM.29.3380	853.949584206287	-0.635973721211893	0.177792048940867	-3.57706503187561	0.0003474737501403	0.0012459459099896
LmxM.26.0660	2235.72209301872	-0.773500908218879	0.109165302748241	-7.08559302952462	1.38450125583197e-12	3.2318102968995695e-11
LmxM.36.2500	1309.52711545418	-0.863099512490006	0.138207336329166	-6.24496163093958	4.2390416145892903e-10	6.01199705752423e-09
LmxM.36.4400	1232.24134199049	-0.669000700313641	0.111335524550237	-6.00887006205977	1.8682077493468e-09	2.36104783046283e-08
LmxM.36.5850	2441.46579167576	-1.51793905103884	0.636344630179028	-2.38540403902172	0.0170603726273531	0.0361753655299511
LmxM.20.0343	29.0846982674806	-1.01951907240695	0.407064886286436	-2.50456157421929	0.0122603262782844	0.0274031084322777
LmxM.36.1840	1013.57449135662	-0.956495718366875	0.111860422263921	-8.55079659998188	1.2224187726018101e-17	6.5834841086529e-16
LmxM.34.4640	771.346220311127	-0.691307217904481	0.180491884187649	-3.83012909979797	0.0001280760469348	0.0005170733105064
LmxM.04.0310	437.087980102709	-1.27847111848581	0.295101171429224	-4.33231461703105	1.47549888368934e-05	7.5657192293716e-05
LmxM.34.2330	1175.64051283671	-0.635815049038072	0.192664730499898	-3.30011127303037	0.0009664650042114	0.0030465461494652
LmxM.34.2570	630.492351425713	-0.65714511477918	0.149067340663817	-4.40837752825551	1.04147886436811e-05	5.56175362436372e-05
LmxM.24.1210	1033.04560612863	-1.20969992156785	0.123380281790844	-9.80464547502455	1.07523911754504e-22	1.15064549721703e-20
LmxM.09.0930	1932.3998345167	-1.35779425197183	0.139020418931071	-9.76686922980029	1.56204500565006e-22	1.6501603649431402e-20
LmxM.29.1590	2901.69926352618	-0.675047922942442	0.161917268123088	-4.16909160318389	3.05816067954487e-05	0.0001450100417749
LmxM.10.0890	4417.79299004981	-0.980492254822537	0.194256528004822	-5.04740955113847	4.47840669093251e-07	3.31257371034865e-06
LmxM.03.0180	421.033366084686	-0.665923383664734	0.23459698569624	-2.83858456956895	0.0045314109774422	0.0116465459931765
LmxM.19.1110	752.687931999011	-0.680166773288361	0.110718301201368	-6.14321901535783	8.08656596202791e-10	1.08346835003431e-08
LmxM.36.5150	1122.7881080741	-1.17686716018799	0.362839203142213	-3.24349505234339	0.0011807286132468	0.0036262283364429
LmxM.08_29.2540	1396.21310292977	-0.706848395729618	0.120320597251655	-5.87470817029953	4.2358888541345605e-09	4.90910325711234e-08
LmxM.15.0281	410.446147124274	-1.02522673306452	0.164758404212209	-6.22260659762172	4.88962345037961e-10	6.8872644839535e-09
LmxM.14.1480	1378.56690527158	-1.11689241408529	0.136830663551002	-8.16258859746728	3.27919886735068e-16	1.45272035843923e-14
LmxM.14.0640	2566.91850381109	-0.79803298535327	0.202073630855057	-3.94921881680684	7.84066534257726e-05	0.0003331979495762
LmxM.13.1480	2863.39951208819	-0.72641676480759	0.138093668703474	-5.260319112583	1.43805610760022e-07	1.17206551203025e-06
LmxM.36.0540	1568.30111286644	-0.681351870615566	0.130327935295689	-5.22798024130214	1.71371819472312e-07	1.3749793500018e-06
LmxM.23.0950	1053.29410397881	-0.876054754006031	0.147980468807089	-5.92007013539116	3.2180435424054e-09	3.85977857196805e-08
LmxM.36.3840	1835.7776463803	-0.992611267501688	0.17879508449327	-5.55166978060321	2.82953717910133e-08	2.69854008747627e-07
LmxM.36.4350	341.738990450189	-0.815643760739095	0.306304729152646	-2.66285069445539	0.0077481784774016	0.0184310019208398
LmxM.25.0750	193.162101688756	-1.63870058039947	0.460811982447745	-3.5561153850536	0.0003763788248911	0.0013356423415602
LmxM.16.0960	879.659042234925	-0.761510684644338	0.120112011225019	-6.34000444150182	2.29758538619713e-10	3.4547634274205e-09
LmxM.31.3140	1227.69914257264	-0.823593239198448	0.0750142405108407	-10.9791585382968	4.81386781750739e-28	9.444350194347819e-26
LmxM.31.1300	718.870923925491	-1.05345653304014	0.136593527363286	-7.7123459169361	1.23525771192667e-14	4.2587964628768697e-13
LmxM.15.0270	1013.60384277199	-0.735566282585672	0.125283199425517	-5.87122843253201	4.32577735146599e-09	4.99921534026364e-08
LmxM.26.2305	727.458616066574	-1.29811795428613	0.119672084284017	-10.8472912630595	2.05423090837175e-27	3.6797527576050503e-25
LmxM.31.0210	1774.14291843219	-0.789717569639903	0.104229460582224	-7.57672125739261	3.5439706781293603e-14	1.1188627734783899e-12
LmxM.31.2340	223.130081383895	-0.890648006337837	0.343177739559651	-2.59529655822278	0.0094509334435784	0.0218998007803955
LmxM.33.3100	231.183740411968	-1.16855893077811	0.316683057260684	-3.689995103894	0.0002242583681117	0.0008492136733641
LmxM.16.1540	839.227747035163	-0.84288632231839	0.200077216009845	-4.21280513157936	2.52218650464283e-05	0.0001218933536554
LmxM.21.0710	1837.10471290176	-1.10964071704078	0.1658371312801	-6.69114756433278	2.21427235881938e-11	3.92378585734875e-10
LmxM.36.1500	1023.25901764039	-0.693941897847375	0.112390169640147	-6.1744003062657	6.64150725908068e-10	9.087022068093e-09
LmxM.36.4170	3344.25747903785	-1.19562052831831	0.102271752380359	-11.690623270751	1.4233818127631102e-31	4.34395042117333e-29
LmxM.05.0580	1575.17099864367	-1.08601853642686	0.229483524889774	-4.73244664055292	2.2182962973421e-06	1.39001988517862e-05
LmxM.34.1230	2103.392046017	-0.858347930669332	0.138207759909414	-6.21056249831355	5.27952732719368e-10	7.3734415552671e-09
LmxM.15.1390	1135.70961537775	-0.908898734311961	0.152073685269622	-5.97669960256772	2.27703516784825e-09	2.82146914031121e-08
LmxM.29.2550	342.885773219332	-0.962134798324199	0.213181913003546	-4.51321026614578	6.38536601165284e-06	3.60873909026196e-05
LmxM.08_29.1870	1216.24908282503	-0.831794027264174	0.12677860600317	-6.56099679186703	5.3449271140738396e-11	8.82609206812995e-10
LmxM.11.1160	979.688674235009	-0.727301613184616	0.227610134433072	-3.19538325916888	0.0013964526437017	0.0041812390203861
LmxM.12.0030	2936.66509150159	-0.665835987105403	0.170364033572719	-3.90831311716503	9.29428005734538e-05	0.0003885584356799
LmxM.07.1030	1263.48179769137	-0.619872174350271	0.104803942172542	-5.91458833990955	3.3270663506060205e-09	3.97319227956429e-08
LmxM.31.2650	1161.76241663716	-1.18906093695431	0.179216736808243	-6.63476502323869	3.2501988191185197e-11	5.60285319446372e-10
LmxM.36.5380	1239.84736790392	-0.723573827552568	0.101999608852083	-7.09388825796256	1.30395430372352e-12	3.06113488965294e-11
LmxM.20.0540	763.403135824504	-0.674830534657146	0.162710747294746	-4.14742446873965	3.36236341713771e-05	0.0001576885290678
LmxM.17.1290	4853.95025484585	-1.08501284229715	0.16333410800454	-6.64290426263564	3.0756162872297596e-11	5.32417609385991e-10
LmxM.34.1410	3249.65108209157	-0.694307609993342	0.124922450053805	-5.55790900430064	2.73025649946888e-08	2.61596669251436e-07
LmxM.34.4270	713.21199327857	-1.32139465293187	0.145780165535517	-9.06429655967113	1.25410830604193e-19	9.22665396587992e-18
LmxM.05.0780	4160.04475854477	-1.38195469654094	0.120287589615775	-11.4887554148788	1.5026111187550199e-30	3.6416222407474597e-28
LmxM.25.2120	1079.10280174683	-0.887581786679299	0.107554845439935	-8.2523644848244	1.55290945202629e-16	7.069598831324111e-15
LmxM.05.0050	1081.51082560174	-1.22246720734034	0.12903862677419	-9.47365326104708	2.70223830268512e-21	2.39424124883068e-19
LmxM.34.1950	688.412117240203	-0.907435716539652	0.130070855028775	-6.97647229534169	3.02683993960261e-12	6.65097629395346e-11
LmxM.34.3100	2463.41124221952	-1.79994099863432	0.728263889778911	-2.47155052433089	0.0134528540041533	0.0295998710264949
LmxM.08_29.1720	2147.26445445487	-1.19821456160135	0.376864578178992	-3.17943004192942	0.0014756498475565	0.0043912440389549
LmxM.28.2010	968.730180288621	-0.75704705676244	0.130282114144525	-5.8108287675055	6.2164322301686704e-09	6.88486580330508e-08
LmxM.29.3310	1620.06440620087	-0.845075945260033	0.187965508242641	-4.49590966534743	6.92731439376456e-06	3.88306602752517e-05
LmxM.30.1220	2025.72876156554	-1.60261135361193	0.647809159960326	-2.4738942464322	0.0133649252032341	0.0294378464781205
LmxM.36.1600	1841.28160554859	-0.681970611318036	0.117653293902464	-5.79644299532659	6.773619410779421e-09	7.46184812096556e-08
LmxM.30.0440a	204.845156475829	-1.00466638889985	0.382253049701855	-2.62827566629868	0.0085818938955864	0.0201180101563677
LmxM.27.2090	1067.23575488968	-0.620134131757934	0.0909005244872646	-6.82211830191163	8.97077413905822e-12	1.75998045013904e-10
LmxM.32.0570	1015.17044215041	-0.631081117468646	0.10221258015433	-6.17420200640452	6.64984746002437e-10	9.087022068093e-09
LmxM.34.0180	755.111054124848	-0.697116413208367	0.195828635516847	-3.55982878279512	0.0003710966641728	0.0013195494061421
LmxM.36.5920	187.122711535817	-0.90779881807656	0.34223685287962	-2.65254548257512	0.0079887364151534	0.0189212957921428
LmxM.34.2260	882.037883691663	-0.611897709491068	0.167285015820925	-3.65781541453834	0.0002543741285063	0.0009475781278898
LmxM.31.2180	2419.65275102797	-0.75592580295441	0.127706943663605	-5.91922241084719	3.2346729052361203e-09	3.87408499115489e-08
LmxM.08_29.0050	446.586405040783	-0.636231847695512	0.133686333559677	-4.75913902905792	1.94420488539357e-06	1.24380809438222e-05
LmxM.34.5290	1890.88179927433	-0.800144128408801	0.162875364265301	-4.91261604858472	8.98691581668313e-07	6.24386056740885e-06
LmxM.24.0940	1285.27062746875	-1.28539063300705	0.17939263352798	-7.16523642988143	7.76524204816703e-13	1.9354678361285397e-11
LmxM.34.4850	1437.72861920779	-0.813735786111886	0.0767238077804284	-10.6060401543243	2.79338217428479e-26	4.1102623421619005e-24
LmxM.05.0250	818.902064051755	-1.16469400509682	0.139388743060563	-8.35572499990744	6.50320510786206e-17	3.10780148101272e-15
LmxM.16.1610	2092.73845067904	-0.875968766108717	0.131386916973592	-6.66709278432022	2.6092015301944198e-11	4.56471775133801e-10
LmxM.34.2860	479.113740159914	-0.674066523623617	0.154934388393317	-4.3506579179338	1.35729661977008e-05	7.03404034396572e-05
LmxM.33.0380	1473.10457896698	-1.30642241618387	0.132971419852346	-9.82483617633429	8.80170217838613e-23	9.54289815130285e-21
LmxM.14.0970	654.50009291173	-0.673122344016205	0.124480025648062	-5.40747272915333	6.39202716504269e-08	5.69787382775664e-07
LmxM.31.3010	2853.9123293038	-1.1436884834567	0.444687965334312	-2.57188989271812	0.0101145054161813	0.0232348828071742
LmxM.23.0090	541.699221260788	-0.629992824185106	0.152612635755598	-4.12805152775166	3.65850143409549e-05	0.000170509342856
LmxM.31.3270	2200.17701995508	-1.27595300225607	0.147345381697359	-8.65960634502157	4.73396218712163e-18	2.80632003035124e-16
LmxM.10.1030	1779.87287884039	-0.731016400601449	0.0972783730596004	-7.51468571697401	5.704781252355441e-14	1.7410147229410699e-12
LmxM.36.5360	1256.03841846141	-0.745419857781083	0.102598420752443	-7.26541258933888	3.71901358770092e-13	9.63668929643256e-12
LmxM.24:ncRNA:rfamscan:433345-433509	668.030449396335	-0.656239573537351	0.247715109498432	-2.64917055268082	0.0080689599740808	0.0190948392264292
LmxM.32.1380	150.515559279896	-1.34655307321787	0.476861049271784	-2.82378498993406	0.004746021121569	0.0121300291692708
LmxM.05.1090	548.367217622557	-2.13393106673721	0.663639587790236	-3.21549694442235	0.0013021888111621	0.0039393263418506
LmxM.24.0850	1867.00393538547	-0.775657961773109	0.0850601593635816	-9.11893379434703	7.586701144197641e-20	5.7883719840915295e-18
LmxM.36.6910	4035.85765521149	-0.880503506402826	0.113221672053144	-7.77681066209243	7.43757942352821e-15	2.6762294519595e-13
LmxM.36.0440	720.743025275441	-1.01232912353097	0.179178505718479	-5.64983572930066	1.60601234739637e-08	1.62374745307314e-07
LmxM.26.1040	2136.81221644255	-0.892226714408639	0.115179927666656	-7.74637328294603	9.455428045337331e-15	3.35830720230947e-13
LmxM.16.0530	1703.43311161006	-0.663845176644371	0.0982452271125655	-6.75702215929292	1.40856654851457e-11	2.6259249682715e-10
LmxM.08.0890	457.303364718355	-0.627989118557981	0.240155665895086	-2.61492526614934	0.0089246980806062	0.0208681930148114
LmxM.14.1240	1333.64689820704	-0.609854265962243	0.173540229264545	-3.514195345637	0.0004410883103732	0.0015381158178059
LmxM.28.0330	1186.69466263068	-1.03743101783965	0.113862872102615	-9.11123177100871	8.14518705229606e-20	6.15746250558895e-18
LmxM.13.0150	939.54790914485	-0.655337817033142	0.102997742487216	-6.36264253184462	1.98311864168219e-10	3.00384147195979e-09
LmxM.30.3070	1420.54415582686	-1.18317129539921	0.473205399305168	-2.50033346436139	0.0124076453961551	0.0276920363121122
LmxM.30.3130	1672.44877720231	-0.951384977005051	0.118527727263369	-8.02668707964905	1.00140078865263e-15	4.04487377377337e-14
LmxM.36.6950	879.793026603859	-0.629448259729811	0.0922346723094005	-6.8244212720606	8.82804707026716e-12	1.73611235940337e-10
LmxM.26.2580	551.676897952	-0.74061949820696	0.148690566046812	-4.98094477610497	6.32745960672707e-07	4.52589124647839e-06
LmxM.04.0770	834.277565339225	-0.741939770561932	0.102088138262651	-7.26763934761039	3.6582389492371e-13	9.509113230824509e-12
LmxM.18.0330	913.889205625912	-0.729058568578931	0.125154303580084	-5.82527765904927	5.70177231539573e-09	6.36620648765051e-08
LmxM.13.0270	1263.17597876442	-0.668382044717395	0.160432457712944	-4.16612731766104	3.09817717802731e-05	0.0001463817657508
LmxM.36.3290	846.750032273252	-1.15847559915905	0.119233669499814	-9.71601062031278	2.57679960892308e-22	2.6213368861143403e-20
LmxM.05.0690	2171.78170503599	-0.788196454832444	0.101800087710007	-7.74259111718788	9.741091594867201e-15	3.43019635648315e-13
LmxM.29.2490	128.489671499066	-1.7534390246798	0.402638481518533	-4.35487193888369	1.33144732246336e-05	6.9174816753456e-05
LmxM.30.1070	3625.10763325062	-0.897220162131966	0.103454186662438	-8.67263269933697	4.2224226122292894e-18	2.55829134740951e-16
LmxM.05.0450	4792.98841227313	-1.20474902602962	0.174503932802587	-6.90385028395052	5.061164079975519e-12	1.05847695479691e-10
LmxM.34.1160	1197.33078744398	-0.776033120361222	0.112054274502641	-6.92551108653095	4.344043104545299e-12	9.249332088230819e-11
LmxM.33.2250	921.306692313646	-0.757593069417904	0.127395590623913	-5.94677622441746	2.7347486487124502e-09	3.32855670094396e-08
LmxM.08.0410	909.792897163246	-0.854549464383283	0.260874409903057	-3.27571211258643	0.0010539593635311	0.0032821712605805
LmxM.01.0030	1197.63460355712	-0.61108804221842	0.147170479084338	-4.15224606198522	3.29227988250546e-05	0.000154842387168
LmxM.21.1568	608.796665043843	-0.634710935221706	0.162496828500263	-3.90598968041201	9.38405166419534e-05	0.0003915168896859
LmxM.07.0650	489.640206305622	-0.799720566665699	0.308132138028178	-2.59538187669527	0.0094485874551626	0.0218998007803955
LmxM.05.0060	2262.44293720515	-0.784501692574216	0.148596212089118	-5.27941918266209	1.29594022684324e-07	1.06949439755079e-06
LmxM.34.3830	665.841014489967	-0.757468887473886	0.117209301888411	-6.46253219898052	1.02965226903718e-10	1.6316028263204502e-09
LmxM.36.0570	1744.71425464588	-1.60800987563725	0.123508969332763	-13.0193773320614	9.49419374313699e-39	6.0178581879576006e-36
LmxM.12.0280	872.680912748963	-0.708294611001533	0.232620940198786	-3.04484458878148	0.0023280057250201	0.0065874887273922
LmxM.08_29.1040	754.972945993295	-0.645754518683958	0.197432436203974	-3.27076204447382	0.0010725811962515	0.0033376393720213
LmxM.04.1050	1690.60578730722	-0.842561626606291	0.118079903019317	-7.13552099097214	9.64212427130892e-13	2.3438954073698e-11
LmxM.10.0290	4855.52375426608	-0.879207993590486	0.0910701010865467	-9.65418927947547	4.71876836353302e-22	4.68465678500146e-20
LmxM.36.1180	497.910344027492	-0.701867472710357	0.168113202247551	-4.17496938566929	2.98026129378724e-05	0.0001419500176925
LmxM.32.1680	747.090988580296	-1.31518312003082	0.288101108738064	-4.56500541005052	4.99481459134434e-06	2.87813092536205e-05
LmxM.18.0150	573.08045658361	-1.5859740028182	0.214863500119781	-7.38130953807445	1.56740120246924e-13	4.40798153868482e-12
LmxM.02.0090	1442.00139051432	-0.946614530321882	0.141387585650632	-6.69517430378196	2.15414712634604e-11	3.8254681726490103e-10
LmxM.33.1020	81.4666236478152	-1.21204149976371	0.51912152170551	-2.33479339438999	0.0195542164498311	0.0406885716026789
LmxM.21.0740	5548.02406988414	-1.04970361699205	0.228489430742064	-4.59410141459469	4.34617987615337e-06	2.54169781259785e-05
LmxM.28.0825	1647.954636035	-1.31033045006123	0.175270180791113	-7.47606035520032	7.65837943995365e-14	2.25375166375779e-12
LmxM.30.0080	3620.04008416367	-1.43322580937714	0.107172758864984	-13.3730420356418	8.69122913358108e-41	6.51052073279165e-38
LmxM.28.1960	965.810307443664	-0.669402329299063	0.0827692457654276	-8.08757314517743	6.08652794594109e-16	2.5719482192079302e-14
LmxM.08.1110	2606.33938304547	-1.15919873586553	0.134399644562008	-8.62501340418883	6.4085148057112295e-18	3.66709458326809e-16
LmxM.22.1640	3371.43495666839	-0.773886419641329	0.138725321783406	-5.57855198814828	2.42528993434788e-08	2.35664965318709e-07
LmxM.26.0460	3213.5546531069	-1.03190907627785	0.134096688814367	-7.69526142219919	1.41205172310113e-14	4.78162947969535e-13
LmxM.08_29.2340	1330.48353135718	-1.16356316309153	0.205862889863642	-5.65212682996067	1.58474583207298e-08	1.60618765759919e-07
LmxM.26.0620	1558.54089431675	-1.24392265299761	0.118195513412368	-10.5242797893499	6.67701032630505e-26	9.485959498060971e-24
LmxM.22.1610	732.286764608516	-1.03676148947902	0.162025323280655	-6.39876204834463	1.56641729380456e-10	2.41709335223775e-09
LmxM.36.0180	12017.9457606883	-0.999151752152047	0.152400027104811	-6.55611269324051	5.522850141038549e-11	9.08349005232687e-10
LmxM.26.0010	95.8641322562527	-1.12180501009054	0.277016563780835	-4.04959542772347	5.13062534891722e-05	0.0002298877263462
LmxM.07.0980	826.612037712985	-0.613751112318633	0.136308474399835	-4.50266291234624	6.71072775543557e-06	3.77965801126378e-05
LmxM.36.2150	820.470580170047	-0.643777556149681	0.135879506438016	-4.73785615672184	2.15991032879321e-06	1.36171852404408e-05
LmxM.21.0370	1083.70680782129	-0.700971898233704	0.12313286577155	-5.69280909561731	1.24966086787457e-08	1.29524598129389e-07
LmxM.27.1830	566.79019933694	-0.626363403923529	0.131545932792601	-4.76155659568033	1.92105406219334e-06	1.23242804467917e-05
LmxM.34.0670	2099.9415223939	-0.609018515338486	0.122965895452612	-4.95274330412361	7.31744761543352e-07	5.18427116435106e-06
LmxM.18.1370	1908.18235046841	-2.15350577249829	0.533911220460533	-4.03345292245545	5.49631961136664e-05	0.0002431007707872
LmxM.22.0620	1585.91973693744	-0.65433104470545	0.125805785921275	-5.20112044063623	1.98090675122723e-07	1.57251171773722e-06
LmxM.33.2610	2699.28645560949	-0.680548158275902	0.111874839155236	-6.08312077509746	1.1786549254320701e-09	1.54651537986628e-08
LmxM.32.1160	336.959879340009	-0.651830876401553	0.223406089096306	-2.91769521161333	0.0035262884481654	0.0093459687400718
LmxM.19.0260	1323.58086812324	-0.722270106472189	0.216890371128433	-3.33011605224509	0.0008680979432057	0.0027693097375203
LmxM.16.1600	1104.91386020866	-0.871641694024214	0.154444337435607	-5.64372710904749	1.66407764189054e-08	1.67628359036406e-07
LmxM.34.3700	3179.6685107306	-0.826321779216468	0.243368840267097	-3.39534748289707	0.0006854154976211	0.0022618436925903
LmxM.13.1060	1297.41139842987	-0.677110054810053	0.10657940212361	-6.3531042707928	2.11012575680112e-10	3.1845121311430804e-09
LmxM.05.1200	1965.81441941626	-1.67143069188633	0.201104486200511	-8.31125512645118	9.46950881435616e-17	4.43345185399402e-15
LmxM.04.0940	1414.42871910728	-0.813493839817605	0.118579606000408	-6.86031828959532	6.87072889279488e-12	1.39789644633654e-10
LmxM.21.1555	4850.85846559733	-1.50476244984614	0.140627166688096	-10.7003681101222	1.01374687701391e-26	1.67065485331892e-24
LmxM.36.3070	2103.3199013296	-1.34713236414204	0.170938151788083	-7.88081741875927	3.2524627010687104e-15	1.24652523985145e-13
LmxM.31.0690	610.471889956418	-0.796854821460811	0.155015319380889	-5.14049078919002	2.7402175764509e-07	2.11814191650614e-06
LmxM.17.0120	1751.79459229829	-0.62685170988592	0.0963169306294965	-6.50821933162756	7.60468313012559e-11	1.22867821553402e-09
LmxM.31.1500	1043.52697602362	-0.897806816160972	0.102421808235779	-8.76577783214083	1.85491490323456e-18	1.1848448684227e-16
LmxM.33.4010	3133.23064904127	-1.02610375864357	0.182098962260578	-5.63486878730942	1.75191674347052e-08	1.74556154367559e-07
LmxM.36.3590	1660.89948762164	-0.660792149846511	0.142995955409177	-4.62105482603113	3.81793853006929e-06	2.25195515302584e-05
LmxM.18.0230	668.774840786994	-0.822397716107424	0.113340851383001	-7.25596910621733	3.98796106641311e-13	1.0268999746013699e-11
LmxM.22.0260	1514.58527439229	-1.09003988235708	0.154024762867702	-7.07704308101001	1.4726276437615498e-12	3.4181554322803296e-11
LmxM.25.1810	583.506603725428	-1.02979067251773	0.111443014343989	-9.24051344608372	2.4531720218132002e-20	1.96253761745056e-18
LmxM.05.0830	7022.59823737479	-1.1486162535986	0.120621772859373	-9.52246204288276	1.6912384324024101e-21	1.54842274255509e-19
LmxM.06.0860	1671.76185559275	-1.27171241807245	0.212719987552128	-5.97834003615111	2.25422817095637e-09	2.7974156820302e-08
LmxM.23.1510	1944.93943901137	-0.724039676217396	0.108117725207308	-6.69677127250965	2.1307472479459897e-11	3.792085814919e-10
LmxM.28.0930	1788.65313183912	-1.00997149384917	0.106076744392649	-9.52113962048741	1.71290178034068e-21	1.55102315055024e-19
LmxM.13.0870	3754.6126619578	-0.873374885314356	0.11500698451737	-7.59410299278345	3.09931821981385e-14	9.89859772529696e-13
LmxM.26.0640	1177.17911057578	-2.06444900340314	0.134084891920068	-15.3965817762214	1.72552786408872e-53	3.55458740002276e-50
LmxM.34.3010	293.293802940779	-0.976597140946038	0.245168876302179	-3.98336508155443	6.79462528491303e-05	0.0002929759934467
LmxM.36.1430	5807.30162156862	-1.14625160181073	0.180904330689961	-6.33623085439124	2.35453923083923e-10	3.53395323535796e-09
LmxM.22.0580	577.069069586559	-0.903582370686275	0.164238045991597	-5.50166293827258	3.76225692167132e-08	3.5029375180307e-07
LmxM.36.5845	624.146729455301	-1.29108218856354	0.267459101506384	-4.82721351149353	1.38456657252438e-06	9.21553195282785e-06
LmxM.05.0890	3804.11585477239	-0.785724760110035	0.0906376268791241	-8.66885847704167	4.3647406377165895e-18	2.62521626677261e-16
LmxM.29.2820	1761.9735067276	-1.15007259388394	0.101215929761462	-11.3625651277852	6.42305069011004e-30	1.4701649357362999e-27
LmxM.36.1635	58.2433163294575	-1.67985847329067	0.711655281305607	-2.36049463471808	0.0182505823169465	0.0382932047863259
LmxM.31.2951	1878.13844763763	-0.713225967185142	0.108287448064432	-6.58641402982152	4.50576251085274e-11	7.54623640028996e-10
LmxM.11.1030	2035.85254995734	-1.16623588642507	0.111926125469772	-10.4196931818213	2.01602504186767e-25	2.72328628606387e-23
LmxM.29.0970	1625.64486577684	-0.861842439776668	0.0810140012458091	-10.6381912573569	1.9793430234207498e-26	3.07731820999754e-24
LmxM.05.0290	2508.85607659716	-0.724096333372171	0.113542010019511	-6.37734291693215	1.80186707420571e-10	2.75973693149722e-09
LmxM.14.0800	1672.91741239161	-0.728346877930464	0.101340918241361	-7.18709570201225	6.61840219046877e-13	1.66775639294993e-11
LmxM.19.0240	1223.26615901218	-0.619156784481891	0.0975097711003728	-6.34968965155866	2.15749736181851e-10	3.25005087045421e-09
LmxM.03.0600	2013.26344189093	-1.17462853813801	0.156538585263896	-7.50376360025097	6.2011095241576e-14	1.87857141467127e-12
LmxM.30.2580	1966.33741131603	-0.843530813476809	0.176147662410694	-4.78877097732975	1.67805857650234e-06	1.09652677798408e-05
LmxM.18.0350	1088.0170834439	-0.724751448791653	0.103654540914418	-6.99198937545867	2.71015410073614e-12	5.98704283915974e-11
LmxM.25.0920	568.274175333587	-0.91421085780761	0.217628369162503	-4.20078899329972	2.65986406095342e-05	0.000127872111215
LmxM.28.1160	878.419186946393	-0.698297203148913	0.0974585495777584	-7.1650687002249	7.7747555067785e-13	1.9354678361285397e-11
LmxM.36.2610	1112.02043331615	-0.778840551392756	0.144850847484877	-5.3768449747874	7.58023865724301e-08	6.64480495060451e-07
LmxM.07.0570	1969.94740767061	-0.860983202273715	0.124505427290225	-6.91522627577308	4.67117165173014e-12	9.818993472004179e-11
LmxM.18.0270	195.795493402356	-1.02766989295006	0.408937917065838	-2.51302178170141	0.0119701944002958	0.026853907394075
LmxM.20:ncRNA:rfamscan:686074-686186	285.597976540507	-1.05374653955942	0.276480858672139	-3.81128207073819	0.0001382479048075	0.0005521874627311
LmxM.26.2500	419.953954700751	-0.697454617719805	0.229127562842217	-3.04395773720201	0.0023348793892947	0.0066046708437312
LmxM.05.0130	612.717679523506	-0.691916362644619	0.214870708918022	-3.22015209112844	0.0012812260311432	0.0038897737515837
LmxM.25.1180	152.87364696026	-1.87276612111211	0.379530775704979	-4.93442492939722	8.03872563838979e-07	5.63737014981548e-06
LmxM.08.1222	2952.87717747758	-0.913062942848948	0.110084717459455	-8.29418436928123	1.0933276860194e-16	5.0612472656179105e-15
LmxM.24.2060	3335.11170143461	-0.719481096141922	0.186375979755088	-3.86037458843878	0.0001132133356138	0.000462278436798
LmxM.33.4290	2728.10760664768	-1.24931181117651	0.167005956857774	-7.48064221589682	7.396028204321111e-14	2.20808957984079e-12
LmxM.08_29.0680	1159.50475312976	-0.670912331550245	0.104690296829183	-6.40854359831391	1.4691626942914002e-10	2.28845001908528e-09
LmxM.31.0190	815.730237943825	-0.756875164039393	0.100643254506138	-7.52037647980903	5.4618733781005503e-14	1.67595668203414e-12
LmxM.22.1540	3277.01771964647	-0.749624313375892	0.0888803321127111	-8.43408542201751	3.33802842087248e-17	1.67715574317007e-15
LmxM.18:ncRNA:rfamscan:569325-569396	397.24149021383	-1.02582401140925	0.186278090570316	-5.50694935871713	3.65105231923346e-08	3.40709752100608e-07
LmxM.08_29.0840	1046.38205448813	-1.02508790214765	0.138864808023677	-7.38191278796044	1.56031393242799e-13	4.40307767233105e-12
LmxM.21.0340	5485.81355844904	-0.645322851899318	0.124346706136348	-5.18970604007565	2.10626326574457e-07	1.66400856277424e-06
LmxM.25.0160	746.934425815542	-0.630925013292949	0.207708425790212	-3.03755136987167	0.0023850874854407	0.0067190156854808
LmxM.19.1280	1094.11505898427	-0.866213147440242	0.159507053836437	-5.43056326730528	5.61764589238468e-08	5.05342818266919e-07
LmxM.36.0250	3609.76355955504	-0.738992134154711	0.130422710747103	-5.66613076757514	1.46058074058509e-08	1.49134886027524e-07
LmxM.21.0750	829.77361953565	-0.739890477810048	0.109774224758839	-6.74011116394125	1.5826549819233e-11	2.91746690180045e-10
LmxM.28.2260	678.971112537229	-0.740337442622442	0.230396903494404	-3.21331333622036	0.001312130572724	0.0039662347466052
LmxM.18.0530	329.365927995717	-0.973864429003473	0.27230666031488	-3.57635185227328	0.0003484226239537	0.0012482619223386
LmxM.26.2480	694.349447400579	-1.06845770007235	0.160971803240472	-6.63754569784002	3.18949096317749e-11	5.50972862402149e-10
LmxM.05.0100	1622.57322524301	-1.23544586887939	0.390539341569842	-3.16343512004013	0.0015591910090514	0.0046082259377991
LmxM.29.1150	810.93752063913	-0.652742092655428	0.112969004212581	-5.77806361315817	7.556524022413681e-09	8.2268682045525e-08
LmxM.05.0140	3023.98338843784	-1.62337630674989	0.0957323054471399	-16.9574554709357	1.69528543110866e-64	6.984575976167701e-61
LmxM.11.0470	1964.03731416792	-0.65539664371303	0.133684927735964	-4.90254701717367	9.46019624231415e-07	6.52864464293707e-06
LmxM.00:rRNA:rfamscan:1128121-1128229	26275.0048368304	-1.02085843114511	0.309803206775168	-3.29518355142778	0.0009835741202127	0.0030959597514286
LmxM.14.1440	3534.56059617322	-0.830017801026324	0.243738178182471	-3.40536639444701	0.0006607533666208	0.0021927538223743
LmxM.34.4430	2335.94638113587	-1.33001084790798	0.236750789820481	-5.61776731100442	1.93440764534104e-08	1.90892443085152e-07
LmxM.31.0985	344.193651706332	-1.2055136495889	0.241776885577143	-4.98605831037665	6.16235532997241e-07	4.43390108273997e-06
LmxM.17.1250	1339.32844966978	-0.70059278365256	0.109451480667525	-6.40094386462176	1.54419343894691e-10	2.3917582588200303e-09
LmxM.09.1050	887.580741954954	-0.65373842740248	0.11623650162816	-5.62420941997882	1.86359460560113e-08	1.84345972991036e-07
LmxM.11.0210	1385.75267994529	-0.895205498567451	0.113570942454114	-7.8823463046381	3.2129009028954e-15	1.23711698317094e-13
LmxM.30.1190	1562.98104992243	-0.944115581090932	0.192815054710473	-4.89648270726888	9.7567229704052e-07	6.71080110819189e-06
LmxM.33.3890	592.05725382786	-1.10871207125684	0.193227011519473	-5.73787309827074	9.58729071052922e-09	1.01541485160361e-07
LmxM.32.0240	1191.35976029462	-0.724285664727112	0.0775647781462312	-9.33781649399721	9.83411777523867e-21	8.44095109041319e-19
LmxM.34.1460	679.876928445163	-0.929225091169266	0.27136168489441	-3.42430469331306	0.0006163747116459	0.0020612530941408
LmxM.19.1380	2836.03448637019	-0.710970800673776	0.120458161112046	-5.90222193424037	3.58638263369887e-09	4.26432798004021e-08
LmxM.34.1990	971.081449157617	-0.654323508720468	0.0874964888188424	-7.47828304373693	7.52998841933171e-14	2.23010251608829e-12
LmxM.33.0490	1846.91962518317	-0.628294240979724	0.141032740647204	-4.45495307044634	8.391154767476e-06	4.58812974678184e-05
LmxM.26.2560	497.200502891278	-0.711320956457929	0.201556893414628	-3.52913236757749	0.0004169245359327	0.0014637657333131
LmxM.14.0851	593.075352383836	-0.67409359762916	0.233793499978691	-2.88328630903168	0.0039354956239172	0.0102849616051628
LmxM.32.0960	446.008367110451	-0.660932270900283	0.27266155293263	-2.42400244475827	0.0153505021471171	0.0330774418651269
LmxM.24.1910	268.36333843352	-0.607345574154233	0.238867102184458	-2.54260870835712	0.0110028368868653	0.0249623832455314
LmxM.32.3250	925.172251836277	-0.717049250884271	0.152036028120328	-4.71631138848725	2.40158790599885e-06	1.4879010786038e-05
LmxM.08_29.2450	169.140663358946	-0.932504621202685	0.312843571588074	-2.98073767815989	0.0028755499705704	0.0078693230679176
LmxM.36.4970	342.014621930049	-0.808468612402078	0.164280212183205	-4.9212781116966	8.59808458888326e-07	6.00917871182342e-06
LmxM.36.2030	3475.73853944238	-2.16782168815739	0.414142562983749	-5.23448175077446	1.65448416260416e-07	1.3326441348835e-06
LmxM.13.1660	4730.3597537175	-1.03573024399825	0.144642003243104	-7.16064642894542	8.02975078579495e-13	1.99292609864308e-11
LmxM.05.0080	855.758596349602	-0.764867914478887	0.155727021672371	-4.91159405904563	9.03389330575285e-07	6.27121152817216e-06
LmxM.18.0090	3088.22997976878	-0.735464116316021	0.125042387187164	-5.88171845452033	4.0602858899037e-09	4.72919446401229e-08
LmxM.16.0590	4381.27406948057	-0.950936931654696	0.186416149643474	-5.10115101869332	3.37594044328526e-07	2.56401808349587e-06
LmxM.30.2970	5628.24752081385	-0.606896189056843	0.207011820248619	-2.93169823987813	0.0033711413350815	0.0089878955095308
LmxM.34.1790	453.735881868628	-0.701830712852228	0.180763124312672	-3.88259892896213	0.0001033459490608	0.0004262115216522
LmxM.25.1770	2600.31374423779	-0.984206728524495	0.234940334928073	-4.18917734507279	2.79967543873549e-05	0.0001341239861347
LmxM.31.1505	525.260319567499	-0.612152419256417	0.159334726483213	-3.84192719796655	0.0001220720474007	0.0004957484822978
LmxM.32.2800	2230.72620063344	-0.946798486697532	0.122305089030808	-7.74128447311816	9.8417417702283e-15	3.45089158241197e-13
LmxM.21.1340	1624.56060350911	-0.628281574598882	0.0828930817267124	-7.57942112310703	3.47100146301949e-14	1.10004046366464e-12
LmxM.05.0770	2446.57057980559	-0.873147049503245	0.144867232555373	-6.02722254095313	1.6680125938177902e-09	2.12105305139793e-08
LmxM.08_29.1500a	46.3398008251601	-1.24426798333672	0.419118832090828	-2.96877135567861	0.0029899298040915	0.008114960996612
LmxM.17.0430	864.394047457882	-0.76125729049926	0.20697267796234	-3.67805692033311	0.0002350175198688	0.0008846707920142
LmxM.22.1460	3680.40027418226	-0.660758438420127	0.150228512791048	-4.39835571919142	1.09074100669964e-05	5.79851993239035e-05
LmxM.14.1320	1871.37915372459	-0.709089799450859	0.159459669994402	-4.44682846437441	8.71473719233401e-06	4.74302737548429e-05
LmxM.08_29.0850	1357.28676396553	-1.2460990798908	0.179151400218496	-6.95556427898994	3.5115362325425196e-12	7.594503558044709e-11
LmxM.29.3390	985.065005935784	-1.01988224576168	0.397694380534666	-2.56448744483274	0.0103328317578605	0.0236967808752492
LmxM.32.1280	742.977170108875	-0.649507323672692	0.164624120055758	-3.94539587183642	7.96682477157256e-05	0.0003380362312963
LmxM.21.0810	1559.0770210014	-1.04449081171256	0.200691435883262	-5.20446130207629	1.94560160685537e-07	1.54746691510505e-06
LmxM.24.0670	436.919697954701	-0.692583964857725	0.308493388685937	-2.24505286096362	0.0247647392673495	0.0498075302814157
LmxM.30.2390	429.256206703488	-1.10712019078753	0.346413443110836	-3.19595042514937	0.001393710561709	0.0041745456301281
LmxM.29.0620	1263.12127852114	-0.989895969121473	0.136050440542983	-7.27594828190747	3.43995367572969e-13	8.9984819961945e-12
LmxM.34.3440	653.416076079297	-0.815147147102994	0.152843783894761	-5.33320444136776	9.6494566038055e-08	8.22249456208452e-07
LmxM.33.0400	902.809825952	-0.708699544281965	0.179241085283334	-3.95389005350917	7.68907526375755e-05	0.0003279398559697
LmxM.36.6660	933.878009686537	-0.752595194152063	0.0968229031347276	-7.77290465154549	7.670648196816451e-15	2.74809309312033e-13
LmxM.29.2900	2082.07856916081	-1.13116605714791	0.12713394713079	-8.89743520654023	5.71520321676844e-19	3.95741802572873e-17
LmxM.25.1860	1145.34577032331	-0.710436081628287	0.104575491748323	-6.79352369997034	1.0942725139398599e-11	2.10673026048234e-10
LmxM.07.0340	3380.90694430188	-1.04016761732207	0.153074873538784	-6.79515581672862	1.08195525919513e-11	2.08789492640935e-10
LmxM.19.0310	389.679527532251	-0.637958316237699	0.282495773528968	-2.25829331273971	0.0239273789348383	0.0483327918881108
LmxM.28.1820	1592.69617077685	-0.870904461088222	0.124322518246073	-7.00520286569829	2.46628216069958e-12	5.4924770281525794e-11
LmxM.34.3230	5311.55778282857	-1.4317294677651	0.201340080147512	-7.11100078392808	1.15204485549909e-12	2.7437636140383697e-11
LmxM.29.0120	1562.92933780753	-1.01641731435535	0.18017300028136	-5.64134089329758	1.68730917341507e-08	1.69347473677712e-07
LmxM.34.1960	278.247576189602	-0.618924051584183	0.236714861472386	-2.61463960367518	0.0089321649515611	0.0208797274328692
LmxM.08_29.1620	1274.22156434042	-0.600220168245068	0.0838472011158335	-7.15849975022868	8.15647370428436e-13	2.01829859829739e-11
LmxM.16.0200	906.869312764724	-0.641427556157468	0.130270028144466	-4.92383064081433	8.48662919120781e-07	5.93631787228798e-06
LmxM.18.1620	565.099296449743	-0.698468506270497	0.14012734786195	-4.98452669609226	6.2113669897978e-07	4.4583331006911e-06
LmxM.33.0110	212.378389349715	-1.70806374525778	0.384481683429717	-4.44251005671123	8.8915476146971e-06	4.82650542457866e-05
LmxM.32.1860	698.757172803828	-0.72546282202731	0.253869464975974	-2.85762142404942	0.0042682929306326	0.0110356867738981
LmxM.12.0060	1094.84193794833	-0.695781410898632	0.0928529384497185	-7.49336986546107	6.71273875758e-14	2.01138063136215e-12
LmxM.19.1365	391.028250398385	-1.53364207075919	0.176131918348803	-8.70734892991994	3.11064392728185e-18	1.91281387767182e-16
LmxM.05.1060	242.661688758108	-0.74517150510991	0.186275210830808	-4.0003793407956	6.32410261334682e-05	0.0002751351928932
LmxM.15.1450	1715.73328343236	-1.05706179391311	0.201243771477602	-5.25264352855143	1.49931543479319e-07	1.21717824460058e-06
LmxM.34.1400	1418.84205921379	-0.614102492921175	0.163867962199292	-3.74754457600638	0.0001785741088601	0.0006924473680036
LmxM.24.0330	1247.95287776914	-1.24668136834001	0.0967264672154687	-12.8887305018893	5.20942834392195e-38	2.86171263692779e-35
LmxM.04.1160	1057.66567397866	-0.730770463013653	0.175967424665126	-4.15287354693259	3.28326188487273e-05	0.000154506441641
LmxM.31.3990	2800.01472342852	-0.647397294138285	0.134211732877454	-4.82370117916151	1.40918491177828e-06	9.35671528851975e-06
LmxM.18.1300	615.32950274664	-0.969893717004325	0.208302444768593	-4.65618019069243	3.22130029585575e-06	1.93889805974079e-05
LmxM.13.1210	610.080186792215	-1.59761215158976	0.705500308663997	-2.26450950052049	0.0235427960961977	0.047664039270926
LmxM.08_29.2120	559.510440504003	-0.688132800104585	0.179505516342907	-3.83349110447421	0.000126337371695	0.0005105541651627
LmxM.20.0220	358.650595174661	-0.967667578058488	0.294282843256204	-3.28822287888538	0.0010082198795978	0.0031540363735331
LmxM.23.0140	116.881305427108	-1.01341504878164	0.382406518160653	-2.65009878402725	0.0080468239147433	0.0190479256126071
LmxM.05.0810	588.994585152436	-0.720625571700838	0.151618757870934	-4.75287874547997	2.00540626459661e-06	1.2780005893485e-05
LmxM.19.1315	474.815333443178	-1.31880079210513	0.122587568379498	-10.7580304392896	5.43186712451614e-27	9.13440512367613e-25
LmxM.26.2590	712.906138848537	-0.740104473525499	0.162211378532192	-4.56259283548732	5.05257405786365e-06	2.90937877266223e-05
LmxM.20.0940	792.598590617497	-0.685910282345334	0.103890827892115	-6.60222173855054	4.0504106191302895e-11	6.853261499308751e-10
LmxM.32.2540	3594.37381082427	-0.866450995595539	0.0985166823089988	-8.79496726125942	1.4308969537620499e-18	9.28392984173173e-17
LmxM.32.0890	582.947205233933	-0.689564916420015	0.111349873308023	-6.19277683875309	5.91133966676031e-10	8.15903498393718e-09
LmxM.17.0840	554.56982299264	-0.702771747420808	0.10851885551121	-6.47603353454289	9.416512812236979e-11	1.50081364744357e-09
LmxM.05.1170	1945.56447400141	-1.06742902876416	0.100625212147085	-10.6079679832514	2.736352876235e-26	4.0995541273048e-24
LmxM.28.1440	1058.13855328923	-0.844181927436504	0.135058047770343	-6.25051184563232	4.09109702189532e-10	5.84239852000303e-09
LmxM.36.5330	338.867128833668	-0.757219033740087	0.202076079904128	-3.74719775888041	0.0001788211034134	0.0006927231739633
LmxM.36.3280	1513.64437302583	-0.905493992506206	0.154430200904481	-5.86345149590447	4.53343319262083e-09	5.20271441604396e-08
LmxM.34.5040	8203.52045574394	-1.61439840243856	0.160216442269771	-10.0763590775549	7.02823233246954e-24	8.273233488507e-22
LmxM.34.1700	345.167811130206	-0.602600130726816	0.15162403482148	-3.97430480884056	7.0585121049491e-05	0.0003034018766029
LmxM.36.1900	1154.45762963421	-0.77261830942944	0.153525392071855	-5.03251155397036	4.84095420761312e-07	3.54258105423908e-06
LmxM.28.2420	1991.23020217242	-1.3239188340975	0.186931408476731	-7.08237767470899	1.41701830135212e-12	3.2983702833733095e-11
LmxM.20.1550	640.017407211799	-0.64027411433752	0.142547003894119	-4.49167009369838	7.06668297362586e-06	3.95043878579899e-05
LmxM.36.6100	354.341050303596	-0.673516438333156	0.253043338918314	-2.66166436631859	0.0077755367687964	0.0184694214398623
LmxM.34.2070	473.639014406557	-0.66829798149807	0.284884571124814	-2.34585530153289	0.0189834756627728	0.0396210332981884
LmxM.29.0660	611.590523434885	-0.734164971345554	0.271899786886726	-2.70013073475268	0.0069312233302586	0.0167557715068946
LmxM.28.2160	648.10269680783	-0.886472996803301	0.129506849789792	-6.84498926691658	7.64816054053773e-12	1.5296321081075501e-10
LmxM.22.1040	741.380250043098	-0.635046441478494	0.0972221005216687	-6.53191443170842	6.493425358558359e-11	1.0553417150793102e-09
LmxM.36.3630	134.55208936699	-0.887868033484154	0.366945664816472	-2.41961717664173	0.0155368541200357	0.0334178224873647
LmxM.29.3430	48.4170575212313	-1.84385761269006	0.58513691317129	-3.15115585974029	0.0016262568306816	0.0047790143669102
LmxM.29.0205	628.914066604198	-1.10718128704528	0.15569996635262	-7.11099246185964	1.15211433307922e-12	2.7437636140383697e-11
LmxM.29.1370	162.850216973729	-1.67028101535018	0.509888574324117	-3.27577651169027	0.001053719081528	0.0032821712605805
LmxM.28.1240	1818.05323603665	-0.702373125878359	0.0792679308054215	-8.86074757776218	7.947964446822321e-19	5.28155056788838e-17
LmxM.20.1310	288.674451278157	-1.04933881037602	0.341783176310712	-3.07018859647462	0.0021392363934862	0.0061057526436877
LmxM.18.0020	971.002454828797	-1.6733499594982	0.117643908313039	-14.223855561187	6.5161636987357605e-46	7.67045555394037e-43
LmxM.11.1100	877.023247375781	-0.845873148676221	0.240392597709679	-3.51871545436593	0.0004336415405295	0.0015153546624104
LmxM.22.0170	968.081486282218	-0.756844803958062	0.183416865295696	-4.12636429446067	3.68543312045364e-05	0.000171500364495
LmxM.23.0830	2338.52060653866	-1.08753136503948	0.145973838958863	-7.45017992810312	9.32130182531074e-14	2.70449038875213e-12
LmxM.29.2130	942.683303310456	-0.687583821723781	0.190097308743168	-3.61700976341935	0.0002980260664454	0.0010866083130578
LmxM.36.5350	762.870503997881	-0.72106328106339	0.207758176409486	-3.47068545520054	0.000519131720538	0.0017720154835266
LmxM.13.1600	1037.2552301589	-0.631543300075293	0.153732750042019	-4.10805960280212	3.98997148824947e-05	0.0001834674389686
LmxM.27.0650	3742.02002117677	-1.05492248742064	0.127827898210959	-8.25267803183048	1.54883917582423e-16	7.069598831324111e-15
LmxM.25.0080	2052.3914654751	-0.654222468158803	0.114359722354245	-5.72074201205437	1.0605983796415e-08	1.11471054186811e-07
LmxM.28.1020	742.2796545769	-0.709492808641368	0.115044285229558	-6.16712779105591	6.95415559046042e-10	9.471444969486591e-09
LmxM.08_29.0030	1930.8435264641	-0.712375791569601	0.133190244211567	-5.34855834063961	8.86575982010326e-08	7.61771229589686e-07
LmxM.34.0140	3094.98592391302	-0.70703900308574	0.178500649584578	-3.96098840385859	7.4640157933561e-05	0.0003188361334227
LmxM.32.1590	1652.27784396624	-1.27387336929366	0.0793600571751869	-16.0518202057439	5.55118665251683e-58	1.52472593389129e-54
LmxM.28.1880	2028.88287232184	-0.609595262440072	0.102647348090811	-5.93873367191884	2.87232035609068e-09	3.48057643149811e-08
LmxM.36.2220	219.560388937827	-0.818355541581631	0.275384676703957	-2.9716814725366	0.0029617378266728	0.0080623454548346
LmxM.15.1470	3956.15316848362	-0.912579562397862	0.15808018708855	-5.77289019709137	7.792322385053481e-09	8.47080955842225e-08
LmxM.36.6940	13013.7945699331	-0.963223854369205	0.162558707618621	-5.92539070025719	3.11555752693817e-09	3.74776555065263e-08
LmxM.09.0070	756.351509529801	-0.806368516966488	0.0998796436418204	-8.07340202232014	6.83660395974961e-16	2.87416411369065e-14
LmxM.29.3190	1043.02831865283	-1.22928260188435	0.153946219836001	-7.98514314410518	1.4035933556507402e-15	5.6417606100303e-14
LmxM.19.1560	1920.86745336874	-0.798634149627335	0.122137538775728	-6.53880991571153	6.20102772379086e-11	1.01583436270451e-09
LmxM.10.0060	580.939477316323	-0.719660873402295	0.161984343368154	-4.44278044679089	8.88037706054254e-06	4.8236194448827e-05
LmxM.34.4130	275.958480964752	-2.24583691554934	0.501216364531836	-4.48077332360662	7.43730681488934e-06	4.11850861254625e-05
LmxM.05.0460	1944.89274995232	-0.863916297316324	0.0964204020428963	-8.95989105015325	3.24999368887013e-19	2.3086162065767102e-17
LmxM.32.1870	924.384349663606	-0.998204972475245	0.173527676921439	-5.75242514729891	8.79722235860348e-09	9.42641251429033e-08
LmxM.31.0380	440.441692925679	-0.687934487689102	0.200847015068653	-3.42516659983199	0.000614422527788	0.0020563938379258
LmxM.27.2000	557.562265273842	-0.610250315978027	0.215372602291951	-2.83346307507951	0.0046046627431042	0.011805358121711
LmxM.26.1570	3925.96638309323	-0.933665249616074	0.117970787208525	-7.91437670044302	2.4849484945387603e-15	9.658479054244999e-14
LmxM.36.3380	1527.00922509476	-0.752163423917746	0.142601793257364	-5.27457198634423	1.33066279448416e-07	1.09537077188307e-06
LmxM.12.0250	2757.60124381318	-0.832168924855632	0.0971947561422887	-8.56187059760071	1.11050802548543e-17	6.05999081456952e-16
LmxM.21.0540	3721.97490722686	-0.917865825789934	0.131682443589613	-6.9702976400594	3.1627114314687297e-12	6.912663712281789e-11
LmxM.07.0830	1081.26765610136	-1.04220638333835	0.432825462435569	-2.40791375228645	0.0160439707873146	0.0343471860970309
LmxM.32.1575	383.663449137369	-0.913181740774755	0.160776299928509	-5.67982806657953	1.34830205220164e-08	1.38356275344228e-07
LmxM.12.0530	2528.16159643183	-0.680536579470873	0.14462747486671	-4.70544466117562	2.53313213958884e-06	1.56118241063665e-05
LmxM.08_29.0440	717.585730352431	-0.874017435157056	0.255617531410759	-3.41923901045963	0.0006279654112642	0.0020940651512817
LmxM.08_29.0020	3273.44749552624	-1.21371537334584	0.127972964645076	-9.48415453773375	2.44355848058003e-21	2.18857846521516e-19
LmxM.28.1350	213.943911626341	-1.04000858753419	0.345352515824343	-3.01144060019869	0.0026001126865071	0.0072308229958889
LmxM.31:ncRNA:rfamscan:148080-148169	68.229795412706	-1.32379775945162	0.560082932845688	-2.3635745383735	0.018099585258219	0.0380072840284721
LmxM.21.1552	5109.33423783051	-1.21010155139503	0.15228233833723	-7.94643400284051	1.9195707143741e-15	7.64118970359545e-14
LmxM.36.2350	761.386130598531	-1.18877525845536	0.111474775509033	-10.6640740295461	1.49884552180327e-26	2.42166413718803e-24
LmxM.32.1630	3962.13592151632	-1.6641713998402	0.216312600658219	-7.69336319186343	1.43316938608244e-14	4.79157340020897e-13
LmxM.34:ncRNA:rfamscan:625529-625589	29.3919906435349	-1.42702269650172	0.433228384775683	-3.29392705244971	0.0009879813508574	0.0031048689287053
LmxM.30.0330	34.2016466330675	-1.04814651804569	0.46190680896049	-2.26917312694419	0.023257799780163	0.047168168887163
LmxM.20.0050	310.474362400466	-1.14359872288207	0.21325867571057	-5.36249565965672	8.20799413554436e-08	7.09694351278966e-07
LmxM.05.0120	1266.89052799065	-0.748618855233515	0.102162683147651	-7.32771333101708	2.3411282445681397e-13	6.3456897155399595e-12
LmxM.13.0690	621.100081843759	-1.44317722662706	0.268899331263881	-5.36697960476075	8.00661064665917e-08	6.93737873064895e-07
LmxM.32.0470	489.891039755715	-0.760411164511845	0.189109817272142	-4.02100311597024	5.79508383564895e-05	0.00025453886357
LmxM.36.3780	1349.08152853844	-0.982974290886522	0.0991736508785824	-9.91164772274009	3.70484977801324e-23	4.23999474594849e-21
LmxM.08_29.1310	290.218363215271	-1.14266114434034	0.37540291570071	-3.04382597084389	0.0023359022467976	0.0066052966759136
LmxM.21.0430	3643.67562830517	-0.725218705051505	0.104597437283617	-6.93342708851523	4.10765667439008e-12	8.76867642408659e-11
LmxM.15.0890	755.240844913463	-0.729943535020873	0.227009302837082	-3.21547851078479	0.0013022724460195	0.0039393263418506
LmxM.20.0260	2308.58967008681	-0.656235645722134	0.21684534453587	-3.02628422633063	0.002475794558042	0.0069318882630874
LmxM.33.0960	455.556441413548	-0.761199246313598	0.171324884703292	-4.4430162473588	8.87064644160842e-06	4.82151231390854e-05
LmxM.30.2290	1128.77143361603	-0.981634844878315	0.127509419250554	-7.69852808245812	1.3764248731224301e-14	4.68666981592101e-13
LmxM.28.1110	976.584479966544	-0.639435661394243	0.164682573120396	-3.88283744465642	0.0001032445920735	0.0004260067294369
LmxM.25.0590	2325.4159768672	-0.823427187212565	0.131690742618875	-6.25273402547085	4.0332870449574203e-10	5.77987569573029e-09
LmxM.05:ncRNA:rfamscan:308487-308581	164.739318661926	-1.29596745901465	0.416420352646014	-3.11216166736285	0.0018572276157151	0.0053734394499624
LmxM.33.0010	3656.23217600309	-1.47290955942483	0.208821396955519	-7.05344174925992	1.7454559726889699e-12	3.9951547819325295e-11
LmxM.29.3090	1567.99452822948	-1.99020174436	0.428177380402012	-4.64807772538432	3.35042674149476e-06	2.00781937090304e-05
LmxM.33.2390	289.09059604961	-0.911387573468913	0.208654273549181	-4.36793149723863	1.254288184912e-05	6.57046067620781e-05
LmxM.10.0670	1701.88702458174	-0.615837064410159	0.111778517910044	-5.50944023882805	3.59976579090835e-08	3.36304649853569e-07
LmxM.06.1270	662.858363585308	-1.06040394419744	0.16603030607056	-6.38680954877473	1.69382371873022e-10	2.60393795565989e-09
LmxM.29.2350	681.112242252234	-1.04226110310822	0.166316612898887	-6.26672877075645	3.68711548408858e-10	5.3301458927877e-09
LmxM.20.0830	85.674961544111	-0.957010887087109	0.299690752787058	-3.19332804962154	0.0014064307102115	0.0042050032845221
LmxM.29.2740	4041.69420179111	-0.872904185135225	0.0963190615138416	-9.06263175134637	1.27340345148219e-19	9.28570304443647e-18
LmxM.25.1170	721.940276645992	-1.75293577855269	0.217668979799812	-8.05321814879109	8.064497869737939e-16	3.30537691208794e-14
LmxM.29.3120	559.862822499941	-0.749113104127111	0.269973313379246	-2.77476723439991	0.0055241228982296	0.0138228887584004
LmxM.31.1750	1120.25886129766	-0.716219051133464	0.108019393689691	-6.63046723990102	3.3462593737360396e-11	5.732469280579e-10
LmxM.05.0010	1142.98385516453	-1.1538254278621	0.149979624439964	-7.69321454277919	1.4348361539038702e-14	4.79157340020897e-13
LmxM.34.2200	79.8868695742303	-2.43567092255394	0.5854751316793	-4.16016119346996	3.18023062194009e-05	0.0001501724946979
LmxM.36.0050	1622.54510183072	-0.702978891524757	0.218267267478696	-3.22072521292443	0.0012786668317503	0.0038863981319101
LmxM.04.1120	1065.18253302201	-0.618280545737398	0.0988623538366658	-6.25395331734547	4.0019067966287005e-10	5.7448975617108905e-09
LmxM.08_29.1400	960.844209061901	-0.800588493769387	0.117285108656761	-6.82600291663911	8.73131551927044e-12	1.72532469733306e-10
LmxM.23.0050	1979.93581675961	-1.25789405679188	0.211967425409765	-5.93437437077978	2.94968087269303e-09	3.56383730073176e-08
LmxM.27.1910	999.183243310485	-0.658528439607744	0.148082433129638	-4.44703956904354	8.70618055772733e-06	4.74150216759242e-05
LmxM.04.1170	141.913353629815	-1.68408690351262	0.534498512431091	-3.15077940227146	0.0016283542658932	0.0047817673381898
LmxM.28.0520	719.48338862456	-0.676557232285881	0.143269584962186	-4.7222669938246	2.33230222531676e-06	1.45042794993284e-05
LmxM.05.0990	338.678500406364	-0.904916284163885	0.227219530246823	-3.98256383674809	6.81758044647272e-05	0.0002936584572866
LmxM.25.1420	2188.16993391097	-1.05806560758694	0.15708661698041	-6.73555537655314	1.6330495228874e-11	3.0036446581679e-10
LmxM.04.1230	8129.11236860815	-0.851933103884293	0.139412366094392	-6.11088619862798	9.90794015549339e-10	1.31256313313932e-08
LmxM.33.2340	4091.76066408455	-1.16804511660497	0.14343553202522	-8.14334565580023	3.84502559204537e-16	1.67634978192877e-14
LmxM.36.4710	627.107924066293	-0.632697134705194	0.138496918145945	-4.56831201137972	4.91667762751555e-06	2.83906262443785e-05
LmxM.05.0110	1077.99972197783	-0.698249455580275	0.144950751543106	-4.81714960527561	1.45623504990716e-06	9.64580129520501e-06
LmxM.24.0310	391.438257472722	-0.788497680471491	0.182065262856871	-4.33085185003887	1.48533596334074e-05	7.60196791175634e-05
LmxM.34.0230	595.752816583538	-1.29238992288846	0.538708938375839	-2.39905045345062	0.016437649637814	0.0350533729336406
LmxM.24.0630	1252.61501269093	-1.18158501701018	0.146496831582548	-8.06560117543826	7.28763536701478e-16	3.0175937399096404e-14
LmxM.27.2100	2520.97329624489	-0.783987985290388	0.107121396465809	-7.31868712653147	2.50408659832364e-13	6.69924466564505e-12
LmxM.25.0710	370.602915995339	-0.861286319976821	0.321222330333511	-2.68127785226695	0.007334159174962	0.0175832295435931
LmxM.08_29.2800	1250.74803728946	-0.984471082759871	0.201619049512036	-4.88282771465551	1.04575236040674e-06	7.11705284374984e-06
LmxM.13.1360	2131.81698392821	-0.705106583464506	0.107004022916614	-6.58953340487004	4.4121095833992895e-11	7.41844131300892e-10
LmxM.29.3450	1190.11609683972	-0.933348821658701	0.173653552829503	-5.37477527209066	7.66782561488664e-08	6.70019968893594e-07
LmxM.18.1520	2720.67958844382	-1.46179124014456	0.226965136620574	-6.44059815489763	1.19003565038288e-10	1.8713537708311e-09
LmxM.27.0180	389.820637751086	-0.701234149849911	0.139326356265207	-5.03303300715851	4.82779962234382e-07	3.53609501227672e-06
LmxM.09.1100	1099.84398695913	-0.604538148959638	0.130835453371624	-4.62059887729751	3.82633930607336e-06	2.25529584277858e-05
LmxM.36.1550	684.848681626625	-0.847356713321435	0.166500604651612	-5.08921102775846	3.59556314523706e-07	2.71065327692162e-06
LmxM.05.0350	8288.71797577153	-1.11565287165884	0.0854595979666101	-13.0547404645495	5.97131812178354e-39	4.10030511029136e-36
LmxM.23.0220	894.115183491616	-0.824232469226392	0.147624720087085	-5.58329572946979	2.36002935091091e-08	2.29594354799361e-07
LmxM.05.0560	481.869429043525	-0.718677814850188	0.230222578412104	-3.12166521549306	0.0017983131158148	0.0052268430597228
LmxM.34.1100	698.692156959547	-0.87846150728969	0.13785687688823	-6.37227193244715	1.86248266741434e-10	2.84728333571321e-09
LmxM.24:tRNA:rfamscan:626779-626860	24.687132538275	-2.74549906827832	0.628791723501053	-4.36630916989753	1.26363586168363e-05	6.60682709408195e-05
LmxM.34.1420	991.233608522948	-0.964417024454044	0.251119602739891	-3.84046889980543	0.0001227995294408	0.0004982117787258
LmxM.33.3670	2886.41625811585	-0.989458804739619	0.148113918666418	-6.680390429532	2.3830650114098897e-11	4.20480849978962e-10
LmxM.27.2110	552.616135701385	-0.948280271106173	0.185114049415445	-5.12268125569433	3.01221304860483e-07	2.30247082750499e-06
LmxM.33.0820	763.580886934192	-1.21890330857081	0.139409039800342	-8.7433591847164	2.2627985882980897e-18	1.41253487633153e-16
LmxM.36.5820	751.538028769385	-1.26022568806653	0.272684960881791	-4.621544525196	3.80893560045444e-06	2.2482542512711e-05
LmxM.05.0280	3389.03245861004	-1.42771479708908	0.122249503740679	-11.6786960552217	1.6378876254138702e-31	4.82006929764652e-29
LmxM.31.0580	784.604629819803	-0.633199415863056	0.115128790678253	-5.49992240978747	3.79958410576892e-08	3.52971511065793e-07
LmxM.05.0200	1597.11561591501	-1.07376130025095	0.118244293521935	-9.08087205114688	1.0770837839015999e-19	7.99564899040466e-18
LmxM.25:ncRNA:rfamscan:456227-456366	2550.25960407743	-0.857885188201058	0.224096488360142	-3.82819558877854	0.0001290861591778	0.000520386473398
LmxM.11.0100	3047.09569903654	-0.980686008782397	0.114836777529712	-8.53982521869928	1.3442500771068601e-17	7.19261080218214e-16
LmxM.34.1720	671.465869593189	-0.870025757987974	0.127487002915432	-6.82442710309147	8.82768853005375e-12	1.73611235940337e-10
LmxM.07.1140	588.895256371686	-0.753254400171849	0.132471134575881	-5.68617761585168	1.29914279633635e-08	1.33979182000145e-07
LmxM.30.1800	389.28834994636	-0.990586384039822	0.331418419074413	-2.98892978491158	0.0027995645916219	0.0077151880384498
LmxM.34.3310	435.406769470988	-0.791055563154055	0.210520511446833	-3.757617524855	0.0001715388079692	0.000667050390593
LmxM.31.2150	2750.60941161059	-0.874925868339301	0.139321845982457	-6.27989000698043	3.38812645079397e-10	4.95002871534438e-09
LmxM.36.1770	1197.61914520152	-0.929899142328689	0.112563355188549	-8.26111784577726	1.443145191348e-16	6.6433052383840906e-15
LmxM.29.3280	798.365066621044	-0.688568643711201	0.146558503105322	-4.6982510678099	2.62398750625145e-06	1.61235324768918e-05
LmxM.29.0880	2266.18771616131	-0.85888732279717	0.102113759342641	-8.41108317161441	4.06241524885503e-17	2.0165241958172003e-15
LmxM.32.1910	1130.99711371931	-0.815877170942884	0.0974814509370787	-8.36956326665171	5.78321717840794e-17	2.80315938529891e-15
LmxM.14.0450	2889.05942425606	-0.869210791612056	0.107988748046108	-8.04908666263018	8.341416908010159e-16	3.3858756316258e-14
LmxM.32.3270	3798.36281641769	-0.64148418712194	0.115666206717126	-5.54599485302354	2.92287422829109e-08	2.77471009690306e-07
LmxM.33.3190	115.323280554863	-1.70867077361875	0.642904953929375	-2.65773465140611	0.0078667804714245	0.0186675450203872
LmxM.16.1370	2096.79251864266	-0.905292916528392	0.126963294821826	-7.13035147519473	1.0011295203195e-12	2.41207814252418e-11
LmxM.31.2980	1662.97258550418	-0.85693056359509	0.193399798960498	-4.43087618601982	9.38509672858514e-06	5.06491587989743e-05
LmxM.34.4770	2648.81289127318	-1.24399790589845	0.0873728411401297	-14.2378099380254	5.33736608993754e-46	7.32998276351423e-43
LmxM.32.2320	534.162362859089	-1.04801774013392	0.175737411413524	-5.96354374236147	2.4682533716597e-09	3.04012074476471e-08
LmxM.28.0210	1651.85262568472	-0.671248450435507	0.158393516164348	-4.23785308067172	2.25667356953025e-05	0.0001104871670405
LmxM.32.0700	574.091690737069	-0.644882795867767	0.134774618075618	-4.78489796577234	1.7107421678135e-06	1.11611365501055e-05
LmxM.36.3910	5720.66634689669	-1.36421096282266	0.256626711334053	-5.3159351796659	1.0611092159234e-07	8.92197952980494e-07
LmxM.15.1010	3278.19121338449	-1.25888621276935	0.271518414587851	-4.63646716072743	3.54414471273797e-06	2.10705284509097e-05
LmxM.33.4550	1291.87838121762	-0.779846483607412	0.109879464841926	-7.09729051492295	1.2722643974374599e-12	3.0124881134726004e-11
LmxM.16.0550	5294.12200515175	-1.10188614237138	0.145449237598345	-7.57574367913987	3.57076194716163e-14	1.12301826124473e-12
LmxM.34.0380	421.331979278311	-0.664107119891969	0.273569198890424	-2.42756539327357	0.0152005462643822	0.0328057886900234
LmxM.32.1250	639.833568768829	-0.72350562898977	0.161341377832011	-4.48431542305957	7.3148391819284e-06	4.05887372788485e-05
LmxM.31.0020	3962.25816339687	-0.97638800258148	0.156262681716473	-6.24837607966476	4.14742082511987e-10	5.91258608979027e-09
LmxM.07.0430	1353.4184995619	-0.948907382603078	0.151452012496774	-6.26539962698278	3.71870474055012e-10	5.3663970336485e-09
LmxM.04.0850	1255.60893234316	-0.679536058991378	0.121127110607164	-5.61010706509157	2.02201480383467e-08	1.98823412692097e-07
LmxM.19.0710	1499.33170913468	-1.08583890149451	0.138969620110625	-7.81349837921513	5.56221299695836e-15	2.04609978102397e-13
LmxM.22.0730	3041.11747359522	-0.660599410618909	0.18139084819128	-3.64185634063685	0.0002706791197852	0.0009992813382752
LmxM.26.1240	4058.92483875139	-1.07889125874406	0.137655876338748	-7.83759682070597	4.592508143548791e-15	1.72010305012918e-13
LmxM.34.4380	2358.40215748301	-1.41445193662029	0.151693629280228	-9.32439907550327	1.11614264725179e-20	9.197015413354781e-19
LmxM.28.0680	1382.67193522033	-0.844175384446056	0.112988479704856	-7.4713403229354	7.93820548064356e-14	2.32778694521363e-12
LmxM.28.2965	464.16423816527	-0.760268264311818	0.236103839070279	-3.22005888301341	0.0012816426863531	0.0038897737515837
LmxM.14.1200	1699.78391317643	-0.900194054060209	0.0985895867487752	-9.13072144580617	6.80443136392013e-20	5.28948249421716e-18
LmxM.27.1805	427.992630434179	-0.672788494701789	0.296444391771696	-2.26952680966867	0.0232363087793131	0.0471361852145594
LmxM.08_29.2410	511.680158955314	-0.687883419323814	0.154901179087936	-4.44078878788464	8.96297336342224e-06	4.86057241959898e-05
LmxM.27.0930	1352.73690158493	-0.852402481585037	0.146816679606542	-5.80589674054347	6.4022411392646e-09	7.07164436830299e-08
LmxM.36.4560	161.915724618416	-1.27906350245014	0.528643372892977	-2.41952054643289	0.0155409827405062	0.0334179795881449
LmxM.34.4125	832.085372159389	-0.844087980544856	0.238199379792343	-3.54361955635953	0.0003946743181501	0.0013933660589361
LmxM.28.2080	1010.5712342844	-1.87539199087932	0.158621531433249	-11.823060677412	2.96675156008224e-32	9.53530807833505e-30
LmxM.29.1610	1740.3524080415	-2.08917146668195	0.485163563988182	-4.30611781624401	1.66144591096486e-05	8.39381625159438e-05
LmxM.25.1840	1731.75313684064	-0.61867729748836	0.0725355011599727	-8.52930341135859	1.4723156672164202e-17	7.77684685760467e-16
LmxM.05.0190	2497.74342612633	-0.89061347196882	0.113631920418854	-7.83770501005318	4.58855414734759e-15	1.72010305012918e-13
LmxM.27.1760	463.594785009512	-0.69903455427549	0.243223723889819	-2.87403935395773	0.0040525846268288	0.0105441418771927
LmxM.19.1490	244.435362946731	-0.683902447037726	0.290368285413265	-2.35529319623996	0.0185080958890213	0.0387269451817002
LmxM.29.3530	458.416216255719	-0.707796025987089	0.148388222465874	-4.76989355506207	1.84323293875565e-06	1.19123446394875e-05
LmxM.27.1250	764.034891081342	-0.667865349061856	0.175590238264008	-3.80354486482152	0.0001426401457546	0.0005683533854054
LmxM.34.0330	676.512786220422	-1.00225827818087	0.112043215784959	-8.94528304243309	3.7099775912314404e-19	2.6030363843780102e-17
LmxM.32.0650	2466.03443481275	-0.776994622560926	0.182836484807051	-4.24966944305943	2.14086211726692e-05	0.00010569624833
LmxM.08_29.2190	1874.32046059104	-0.705124620246242	0.150211386231985	-4.69421551810495	2.67631764375297e-06	1.6383995085085e-05
LmxM.16.0880	1821.86900112061	-0.969602021585315	0.141549463107745	-6.84991663194985	7.389303846027829e-12	1.48870082374742e-10
LmxM.19.1460	802.42627305546	-0.74153588102377	0.19306578067686	-3.84084573881531	0.0001226111500901	0.0004976925501197
LmxM.24.0320	1064.51626790835	-0.627973226655599	0.161799475775595	-3.88118208446209	0.0001039499740952	0.0004280598633409
LmxM.30.2020	925.983554902129	-0.964866217486629	0.16091741450304	-5.99603355837164	2.0219525465239203e-09	2.53590395484887e-08
LmxM.26.1310	1396.26046090404	-0.754727995566623	0.10680587222748	-7.06635299938535	1.59058496628352e-12	3.6610112073117794e-11
LmxM.36.4580	496.942029930555	-0.928206661560504	0.114075497630782	-8.13677503792048	4.05946005900841e-16	1.76052373085417e-14
LmxM.06.1280	730.579416643559	-0.614954322310151	0.130312883184823	-4.71906005976368	2.36936865201149e-06	1.47015042865773e-05
LmxM.36.4040	1654.9639052801	-0.910353595465627	0.139329002402122	-6.53384133791634	6.41038555075082e-11	1.0439046825728601e-09
LmxM.36.1260	8016.97600202957	-1.12281299466905	0.173894669697972	-6.45685688134774	1.06899904312135e-10	1.69070098182724e-09
LmxM.30.2250	3744.76807472135	-0.99528878189976	0.147930710653194	-6.72807409296572	1.71923378502009e-11	3.13417840454991e-10
LmxM.21.0550	1053.03090240242	-0.905827928852891	0.119860955327664	-7.55732278602842	4.11450025657831e-14	1.26979333761068e-12
LmxM.33.3600	292.008797537935	-1.64682993936953	0.412756355957381	-3.98983544553721	6.61191502394591e-05	0.0002858456442671
LmxM.07.1170	280.155121696546	-1.198488700325	0.390411255976129	-3.06981082635148	0.0021419439469715	0.0061113636160129
LmxM.33.3490	1778.95276865814	-1.21885605990908	0.179736273395158	-6.78135824719909	1.1905125346557599e-11	2.27079242721377e-10
LmxM.08_29.0780	1033.72127117139	-0.994539171213578	0.395327776535739	-2.51573309603675	0.0118785100121204	0.0266918250613232
LmxM.27.1300	1155.40509503982	-1.01192391868721	0.427668181623121	-2.36614263620613	0.0179745178820627	0.0377735341362398
LmxM.34.4090	383.968103598545	-0.684209136777107	0.152264356253618	-4.49356076242465	7.00420238289157e-06	3.91944472376383e-05
LmxM.34.3370	1275.30011642465	-0.856718930061086	0.200198071326188	-4.27935656115893	1.8743438586383e-05	9.37171929319152e-05
LmxM.15.0170	1788.71782583561	-0.671904370118417	0.0874873576022944	-7.68001673079215	1.59067813372122e-14	5.242875128745129e-13
LmxM.07.0040	551.161078711077	-0.899541029229292	0.220906535816231	-4.07204352694032	4.6602467716323e-05	0.000210991392298
LmxM.28.0470	783.068102870211	-0.701812819206706	0.164507717182782	-4.26613918924504	1.98884726073675e-05	9.86254217743229e-05
LmxM.33.0910	3319.24288183187	-0.618672949052051	0.130297921921929	-4.74814133584374	2.05294557928193e-06	1.30325666974446e-05
LmxM.36.6170	295.129374209587	-0.610340292350145	0.271045641529318	-2.25179895498938	0.0243349797634053	0.0490389418563119
LmxM.28.1930	302.438574698798	-0.874630387300412	0.243728568692855	-3.58854274651166	0.0003325314766954	0.0011965324750961
LmxM.17.0010	3094.39284381887	-1.44273923053031	0.171826286247211	-8.39649894111428	4.5998788117238e-17	2.2561310362264303e-15
LmxM.34.1570	1321.98161329508	-0.714784533566426	0.0997485720154183	-7.1658623188705	7.729843015203079e-13	1.9354678361285397e-11
LmxM.29.1120	2113.95280072096	-0.842459143976476	0.125473873245852	-6.7142196393808	1.8907533040828e-11	3.42413345618511e-10
LmxM.14.1340	1258.67859759246	-1.36303350580603	0.161219533712857	-8.45451834784296	2.8024172871469e-17	1.42542706457349e-15
LmxM.08_29.0760	4698.04169312873	-0.748312639344192	0.116533017365145	-6.42146454510336	1.34969451824986e-10	2.1103382979846e-09
LmxM.12.1270	1785.36774416838	-0.926826849389743	0.152106433618943	-6.0932784191866	1.10621418192528e-09	1.46077000946543e-08
LmxM.23.0200	4642.29175104066	-0.944101191081911	0.137186178971021	-6.88189727393269	5.9060599121393496e-12	1.21969758586537e-10
LmxM.14.0250	1024.69979728103	-0.609228843679197	0.120083373195972	-5.07338216328216	3.90806518105082e-07	2.9222324163102e-06
LmxM.08_29.0920	539.352589696563	-0.855757494331317	0.245805540480969	-3.48144103121863	0.0004987235807445	0.0017115711392482
LmxM.13.1370	587.783843503918	-0.757035659977202	0.128405732652338	-5.89565313276856	3.73202216813686e-09	4.39312323792111e-08
LmxM.32.1330	1715.85765966985	-1.26995047942303	0.149559626675546	-8.49126537456567	2.04399236839762e-17	1.0659808301010401e-15
LmxM.24.1190	753.369733823945	-1.00133546537484	0.144937299138478	-6.90874930971447	4.8894510968103594e-12	1.0251673546493001e-10
LmxM.31.0230	2341.33131775139	-0.608967379953522	0.128769539410026	-4.72912602424131	2.25488391136833e-06	1.40948661515591e-05
LmxM.36.4460	2345.73649809482	-1.46178642463353	0.170053458241523	-8.59604056130038	8.251364823976979e-18	4.656934667778789e-16
LmxM.28.1080	501.60160258396	-0.677705107643971	0.138202081724987	-4.90372575568406	9.40357539594101e-07	6.50591614295163e-06
LmxM.34.3260	1044.1897322908	-0.836551315384821	0.0980510673330725	-8.53179203591039	1.4409792257298e-17	7.66043149678296e-16
LmxM.19.1485	518.99393968976	-1.45247513017349	0.166105307054646	-8.74430297218412	2.24396582881464e-18	1.41147163583455e-16
LmxM.08_29.2630	1667.61888960632	-0.837210385421041	0.221373978939901	-3.78188253845465	0.0001556468070881	0.0006136505695724
LmxM.19.0550	1573.058980336	-0.654742042029343	0.165687261643199	-3.9516739883076	7.76064178927667e-05	0.0003303083075601
LmxM.08_29.2350	1513.06621629411	-0.911710898773265	0.153955856884379	-5.92189811562648	3.18246778693617e-09	3.82267267701954e-08
LmxM.16.0520	2570.52441122414	-0.66548175984906	0.128330914886305	-5.1856698788335	2.15239784481219e-07	1.69882741774449e-06
LmxM.34.2140	487.314460369263	-0.722230621175913	0.153011564095509	-4.72010481982328	2.35723141433307e-06	1.46372169209529e-05
LmxM.23.0030	750.903832332223	-0.602729683540804	0.159139215839878	-3.78743655584715	0.0001522095333899	0.0006024046854626
LmxM.33.0705	467.515112670912	-0.743259873206662	0.179803566110011	-4.13373265773776	3.56918628388879e-05	0.000166440831801
LmxM.34.0070	1456.01873146591	-0.862496648115607	0.0942231472959529	-9.15376606351859	5.49825560732019e-20	4.31482154326842e-18
LmxM.07.0070	1003.40184903254	-0.710722513344994	0.182672463393007	-3.8906932120137	9.99582477513577e-05	0.0004141055613228
LmxM.33.3060	558.409715230606	-0.603538695729253	0.202773845578288	-2.97641292942898	0.0029164188419618	0.0079547471889325
LmxM.32.1035	495.86410410243	-1.050514848859	0.355177193330703	-2.95772045217125	0.0030992304783927	0.0083730029973626
LmxM.10.1200	947.774876467997	-0.705606641403151	0.119662973230414	-5.89661632462104	3.7103122164877404e-09	4.38636623584778e-08
LmxM.29.0730	1781.10208499872	-1.84891420593488	0.164960293718272	-11.208237838692	3.71516052915692e-29	7.65323069006326e-27
LmxM.29.0360	1741.5013808919	-0.622658938629739	0.0805591359044158	-7.72921570768248	1.0821117973489601e-14	3.77822085176076e-13
LmxM.21.1330partial	1619.64582245725	-0.663972538071045	0.117152120432787	-5.66761007498778	1.44803029642388e-08	1.48036844200158e-07
LmxM.28.2430	2421.11991816542	-1.00657624568018	0.123878468151551	-8.12551414866345	4.45470020827778e-16	1.91180883938588e-14
LmxM.31.3610	3279.71476170163	-1.17008731723594	0.168133513971401	-6.95927474301742	3.4202891723549196e-12	7.455868460371559e-11
LmxM.09.0770	2520.39307619121	-0.618222134834129	0.105731293280706	-5.84710652496049	5.001972067845911e-09	5.67716939931822e-08
LmxM.05.1190	1863.85983998978	-0.62372025804121	0.133197738910974	-4.68266400871931	2.83170456306144e-06	1.72710922277026e-05
LmxM.30.2270	1265.68964230411	-0.865724648678907	0.100992699931748	-8.57215075212339	1.01570007001867e-17	5.57957905130257e-16
LmxM.24.0130	435.732962205139	-0.772569663387038	0.199731194646743	-3.86804707573823	0.0001097104878888	0.000449982289798
LmxM.31.2810	720.002337852103	-0.665630216191133	0.115515547582726	-5.76225651109384	8.29967293414069e-09	8.97497440647235e-08
LmxM.12.0670	3506.47044910323	-1.25751643914212	0.175698008906898	-7.15726061419669	8.230513898226169e-13	2.0244607319816e-11
LmxM.24.0830	2543.42573267941	-0.892563495086052	0.126578622026904	-7.05145529942913	1.7705610905205699e-12	4.0413915196369696e-11
LmxM.34.5150	909.52058648793	-0.837791154020826	0.26164281339918	-3.20204152805312	0.0013645732443127	0.0040976980805892
LmxM.08_29.0870	2471.99556996553	-0.836627987269734	0.126968566667121	-6.58925283029429	4.4204547144264294e-11	7.41844131300892e-10
LmxM.05.1210	1601.55864580961	-0.624752030295616	0.0716510267680288	-8.71937302892057	2.797464985013e-18	1.73316627642911e-16
LmxM.34.0100	4641.59369806626	-0.813906192309305	0.150686628247986	-5.40131663819468	6.61535369830287e-08	5.86134564236728e-07
LmxM.17.0630	135.852719245588	-1.00773621636997	0.373781082471494	-2.69605997635481	0.0070165031894295	0.0169052591464619
LmxM.30.1890	168.363396401806	-1.57823128899973	0.33002039220024	-4.7822235422414	1.7336672783046e-06	1.12883844243157e-05
LmxM.06.0350	1841.70577155845	-1.24856089446834	0.122702906903989	-10.1754793425171	2.55140665648614e-24	3.23439859222243e-22
LmxM.36.3020	463.206927777757	-0.738812233276533	0.163273675683849	-4.5249929615544	6.03975157129113e-06	3.42280281619249e-05
LmxM.36.3100	1701.47937257348	-0.970049418702956	0.118432550801552	-8.19073313998271	2.59639701021806e-16	1.16273431327157e-14
LmxM.05.1130	1647.94082629436	-0.794244482218681	0.136227929780252	-5.83026170550978	5.53405146877025e-09	6.19573153568843e-08
LmxM.25.0910	8900.5819583648	-0.782409149985784	0.132529650363599	-5.90365361893904	3.5553824838141803e-09	4.23357683043769e-08
LmxM.23.1520	547.908213687861	-0.642596804653394	0.247304223215839	-2.59840611008312	0.0093657653875757	0.0217391286742603
LmxM.28.2180	884.667422674893	-0.617130919638907	0.156846847693032	-3.93460836934833	8.33324632808391e-05	0.000351952587101
LmxM.28.0690	474.59295995995	-0.832992736961367	0.287981806777249	-2.89251861526683	0.0038216653448797	0.0100256359254406
LmxM.22.0850	112.52437453873	-0.660897074352021	0.24427858493259	-2.70550557894545	0.0068200502678817	0.0165091698611474
LmxM.32.2610	1227.30820045102	-0.646505403926118	0.0794926681537976	-8.13289349748958	4.1916287225959697e-16	1.8083256897482102e-14
LmxM.28.1570	1021.39129819379	-0.912246783109898	0.104105177459795	-8.76274173263097	1.9055790404742e-18	1.20784394565442e-16
LmxM.11.0900	767.29750452012	-0.751738141672866	0.110519367098818	-6.80186795677831	1.0327123465001299e-11	2.01171388538086e-10
LmxM.30.1780	1152.12837457043	-1.03824294747607	0.177411436451713	-5.85217598279607	4.8518284135647406e-09	5.53726677669993e-08
LmxM.23.0760	580.392555642139	-1.56198626313277	0.235960282507246	-6.61969991956086	3.5992876605116296e-11	6.140399652715491e-10
LmxM.29.2950	349.176539587965	-0.723644275979102	0.287947602188076	-2.51311096352331	0.0119671687241643	0.026853907394075
LmxM.34.3900	944.586439908629	-0.837931590987468	0.16207280387617	-5.17009375383967	2.33976581528436e-07	1.8326682811733e-06
LmxM.17.0735	2659.40931931803	-0.637614547380833	0.124937557234413	-5.10346577518333	3.33488847051362e-07	2.53969325296047e-06
LmxM.18.0060	879.593756759124	-0.635170114883187	0.146353630238042	-4.33996829357833	1.42503275816474e-05	7.3343347453326e-05
LmxM.29.2470	145.414547439201	-1.56005494636311	0.311967736964934	-5.0006932176402	5.71245471632604e-07	4.14354109705339e-06
LmxM.30.1430	3901.04276992337	-0.727071657186522	0.129022482287215	-5.63523228120816	1.74822536657128e-08	1.74556154367559e-07
LmxM.08_29.0868	515.593461785508	-0.816896092873839	0.266203889249778	-3.06868579259317	0.0021500259102287	0.0061301776817593
LmxM.05.0500	13.614828086262	-2.54501033621354	0.843742988172257	-3.016333613304	0.002558515915896	0.0071368216475909
LmxM.04.0050	1846.90430336895	-0.60372061339092	0.188341923814474	-3.20544996654921	0.0013485148893691	0.0040611048137421
LmxM.31.1830	859.667620717619	-0.805213187641496	0.116666784885951	-6.90182032897059	5.13403456984248e-12	1.07099860393676e-10
LmxM.05.0850	2637.56343545064	-0.76833713733397	0.080308360585792	-9.56733684674298	1.09694833277387e-21	1.06339461906549e-19
LmxM.31.1030	882.659059680518	-0.73986852393356	0.14990489832312	-4.93558604295087	7.99104404023026e-07	5.60870552738478e-06
LmxM.29.1420	66.3464363763347	-1.95117054256911	0.55998880972078	-3.4843027373029	0.0004934210329386	0.0016969070581864
LmxM.34.0030	4319.03909352748	-0.603701469400483	0.14259988934029	-4.23353392624207	2.30047459379411e-05	0.0001124312612862
LmxM.19.0300	487.972108438428	-1.37575345941559	0.289904293973674	-4.74554357425462	2.07947140357999e-06	1.31806495119224e-05
LmxM.28.0410	47.3513976502163	-1.42873326770086	0.632928857207665	-2.25733627315413	0.02398707044124	0.0484326048605288
LmxM.22.0300	2952.53499864172	-0.980528997737101	0.127123118750771	-7.71322327026493	1.22679192268399e-14	4.2473804382000197e-13
LmxM.13.1620	459.634115743672	-1.45716802367488	0.183906160493862	-7.92343236225364	2.31042461585703e-15	9.06566611174379e-14
LmxM.28.1920	1008.72313030999	-0.754269564762981	0.123710579239328	-6.09704981902788	1.08043855551346e-09	1.42902306539822e-08
LmxM.30.2790	2339.58947880509	-0.712387739309916	0.160043764810921	-4.4512058320519	8.53894457770468e-06	4.66275038570488e-05
LmxM.29.1890	430.193465655143	-0.883198533261995	0.148219795673343	-5.95870834425146	2.54239370850411e-09	3.12210494159074e-08
LmxM.33.2600	237.766580293673	-0.843243068981741	0.22564728847468	-3.73699624170915	0.0001862317061956	0.0007167441658348
LmxM.28.1060	1993.42114985672	-0.77820323923958	0.234163600256271	-3.32333137339837	0.0008894918224275	0.0028277054848778
LmxM.36.4990	618.011067184492	-0.601125811062801	0.156084522996824	-3.85128390388221	0.0001175001860638	0.0004781242139093
LmxM.36.7000	1198.38674070352	-0.895708024363866	0.199172729461768	-4.49714188676517	6.88730289167632e-06	3.86326588341817e-05
LmxM.15.0185	440.949517586609	-0.607450330993809	0.168479000774476	-3.60549580779467	0.0003115575208243	0.0011319373772455
LmxM.33.0830	346.627192785338	-0.661933000914664	0.241982800604274	-2.73545474827839	0.0062294150741623	0.015299666232816
LmxM.36.5100	1332.9174916658	-1.72923054991843	0.464124006074206	-3.7257942431057	0.0001947011807996	0.0007455100974858
LmxM.23.1500	142.463758633141	-0.60196715226604	0.244016839952828	-2.46690823626111	0.0136285278276826	0.0299304555703905
LmxM.25.2010	9568.69575007101	-1.06846914602563	0.192073289579372	-5.56282004835502	2.65449583791849e-08	2.55228071230436e-07
LmxM.36.2020	1223.51083947779	-1.83969932701391	0.219766605049247	-8.37115050579071	5.70583771668631e-17	2.78201791630149e-15
LmxM.08_29.0510	872.428429920724	-0.875212977431045	0.216088843596588	-4.0502460139264	5.11638151665074e-05	0.0002295944033768
LmxM.22.0090	1026.15548293753	-0.734602553882666	0.100272891348389	-7.32603342742313	2.37064684833491e-13	6.4046327968130096e-12
LmxM.36.3000	1060.20815722148	-0.983447453168525	0.125573701815689	-7.83163543758535	4.81564204050317e-15	1.7955154033369299e-13
LmxM.26.2660	1222.58065803066	-1.10363331422585	0.176984064612535	-6.23577787436397	4.49538603171813e-10	6.35368454568737e-09
LmxM.34.0190	1122.33213689169	-0.816377216795048	0.153254742710533	-5.32692954460155	9.98868863036224e-08	8.45038955997791e-07
LmxM.29.3250	716.71732031822	-0.712247916929121	0.105116129350308	-6.7758194801437	1.2370305915394299e-11	2.33787432896442e-10
LmxM.29.3130	2523.08143658356	-0.833323373747843	0.150248217508953	-5.54631121462848	2.91759323935911e-08	2.77289138319713e-07
LmxM.20.0160	341.798298445298	-0.622899455462332	0.230998666097771	-2.69655001037404	0.0070061876316758	0.0168902826462869
LmxM.33.0200	534.036536849049	-0.740858722097311	0.239305805138501	-3.09586606839116	0.0019623897701808	0.0056538782189826
LmxM.28.0890	2042.89748601799	-1.00415993245308	0.196909857051915	-5.09959200360568	3.40386387892817e-07	2.58029791742117e-06
LmxM.16.0920	564.176899089652	-0.76383546930192	0.133528638406368	-5.72038686545532	1.0628177780886e-08	1.11562018999364e-07
LmxM.34.0950	303.04834380875	-1.21128900924075	0.41454290115026	-2.92198709923557	0.0034780594646968	0.0092329929088601
LmxM.05.0400	2583.44604991503	-0.801542595780132	0.116758186568851	-6.86497982997939	6.65006484747292e-12	1.3563498599796301e-10
LmxM.20.1250	207.677924190478	-0.786608216838515	0.332379984143516	-2.36659321970143	0.0179526525253273	0.0377372083695655
LmxM.14.1160	17874.9728359457	-0.90385650553059	0.129986799450939	-6.95344842205867	3.5646331676696197e-12	7.68915636167477e-11
LmxM.08.1100	7929.10339770477	-1.13800852650014	0.181268931730187	-6.27801198825417	3.4292948009484e-10	5.00130781589643e-09
LmxM.21.1230	126.510345832206	-1.00457749352511	0.393108986796062	-2.55546814564752	0.0106045066845252	0.0242012164732767
LmxM.31.2050	347.87092866742	-0.837055352313338	0.180099703971001	-4.64773308260473	3.35602782557747e-06	2.00971433740976e-05
LmxM.25.2090	3095.2836415917	-0.685021015422114	0.139212231014417	-4.92069562013679	8.62371573292002e-07	6.01688549019991e-06
LmxM.21.1210	695.323260335493	-0.759883508266169	0.16274594636525	-4.6691393871081	3.02464117834171e-06	1.83555355626615e-05
LmxM.34.2080	1755.86628500277	-0.759096159867732	0.211508296552014	-3.58896635376691	0.0003319916807734	0.0011951120356372
LmxM.05.1110	7718.57019230353	-0.720241889941429	0.151733739208358	-4.74674844038743	2.06712779983366e-06	1.31124965901689e-05
LmxM.30.3040	131.729185706741	-0.666268077022782	0.250165830104773	-2.66330568304927	0.0077377087464188	0.0184220514505899
LmxM.31.0270	2318.16320771934	-0.935172571793855	0.184697622150704	-5.06326265007787	4.12141415205044e-07	3.0650227989978e-06
LmxM.08_29.0210	1541.86691554605	-0.620034515650313	0.119776383828113	-5.17660072740303	2.25965079373926e-07	1.77328786099157e-06
LmxM.28.1200	1382.64423707038	-2.04112697470226	0.541400022987411	-3.77009029929376	0.0001631884921607	0.0006400157902925
LmxM.08.0470	447.215014003576	-1.1694465189145	0.171105846949162	-6.83463797272781	8.22123779493098e-12	1.63630433406356e-10
LmxM.20.1440	2171.37253394599	-0.699048800700004	0.191039712512773	-3.65918055207115	0.0002530230322275	0.0009438251632209
LmxM.24.0140	2292.39140941567	-1.15166118675623	0.136561523639217	-8.43327722235152	3.3611720762022e-17	1.6785489641155201e-15
LmxM.34.5280	434.817611945722	-0.681528680277303	0.157897361808282	-4.31627655124986	1.58683154358855e-05	8.06631210312746e-05
LmxM.36.3210	582.641452588348	-1.1229228050822	0.318148591613125	-3.52955453735813	0.0004162599003028	0.0014626787115118
LmxM.15.1540	736.534249631355	-0.745635727927319	0.115902938395466	-6.43327717355342	1.24881619984895e-10	1.96004675938197e-09
LmxM.11.1050	2149.83217694853	-0.819458646945596	0.170046404832713	-4.81902953344856	1.44258200594741e-06	9.56305368383481e-06
LmxM.28.1530	2023.67237065675	-0.724035448749351	0.102014020795668	-7.09741115095911	1.27115473247036e-12	3.0124881134726004e-11
LmxM.36.4450	2032.32850069943	-1.13859778992302	0.0900805209682245	-12.6397780306428	1.2741313487871599e-36	5.8326901744479e-34
LmxM.34.1380	5147.61165567937	-0.993481566714227	0.146350741791433	-6.78836030862115	1.1341511896304698e-11	2.17841627099186e-10
LmxM.33.0160	300.748227561724	-0.932112410608426	0.233436650052288	-3.99299943003655	6.52427253535408e-05	0.000282649872194
LmxM.31.3320	622.245895577277	-0.67576149650128	0.141791742888277	-4.76587340515124	1.88037301442485e-06	1.20954517087126e-05
LmxM.34.4470	10952.9836098672	-1.56785588339888	0.190976612465204	-8.20967480342411	2.21788358401043e-16	9.9865359192601e-15
LmxM.33.0840	506.828762176681	-1.43592409734567	0.189872058507239	-7.5625877163539	3.95128482150035e-14	1.22400702741214e-12
LmxM.33.3050	622.915629938536	-0.728130706356695	0.166154373853146	-4.38225422221053	1.17457636823045e-05	6.20417261167878e-05
LmxM.19.0295	951.684906810118	-0.600828973410162	0.18752899963925	-3.20392565718358	0.0013556747768831	0.0040784082371365
LmxM.24.0050	1015.44969632226	-0.627030042101578	0.133832304519192	-4.68519199721067	2.79697615818869e-06	1.7084568972183e-05
LmxM.32.2140	301.705479948753	-1.15665143566351	0.301423720234724	-3.83729400845694	0.000124397505231	0.0005032083667668
LmxM.12.0080	722.61821759692	-0.845309085506799	0.191007423723175	-4.42553000836186	9.62057811712044e-06	5.1778944275031e-05
LmxM.15.0275	1476.13937162274	-0.904822909215579	0.104570450148648	-8.652759053149	5.02690825090015e-18	2.9586945705298005e-16
LmxM.31.0140	728.705471084323	-0.884258496700922	0.151141994344691	-5.85051494480285	4.90053426332157e-09	5.58511788793495e-08
LmxM.36.5930	501.909449205215	-0.839805858009699	0.191935620178538	-4.37545598481675	1.21178893322074e-05	6.38028166756478e-05
LmxM.18.0540	130.88912330732	-1.20793116891781	0.502554670044268	-2.40358162189878	0.016235342204153	0.03467579568746
LmxM.36.6980	5593.24157670843	-1.18483743812634	0.160578060093707	-7.3785761108019	1.59991321662627e-13	4.48411051190492e-12
LmxM.24.1500	153.906779267085	-0.899735866271183	0.28512342812019	-3.15560132046361	0.0016016762546714	0.0047202476174866
LmxM.30:ncRNA:rfamscan:480835-480981	168.359070060083	-1.06686102580184	0.333934022552027	-3.19482578519121	0.0013991527148887	0.0041878018055514
LmxM.05.1050	632.921787313711	-1.25803016801077	0.186352682453462	-6.75080257202594	1.47029555905717e-11	2.73244651902206e-10
LmxM.29.3480	398.271119423087	-0.889083762484262	0.262320490414654	-3.38930352363581	0.0007007040305227	0.0023058311547553
LmxM.32.1700	809.826527683631	-0.835764352825334	0.187305442029997	-4.46203988398525	8.11831106841028e-06	4.45668775507666e-05
LmxM.36.2950	1927.23899559609	-1.41453096244556	0.508376862747114	-2.78244559518674	0.0053950909909724	0.0135493903583093
LmxM.25.1015	800.303724104211	-0.604714918583325	0.114548040900554	-5.27913802653609	1.29793009411504e-07	1.06949439755079e-06
LmxM.06.1070	716.029677375174	-0.606820609710016	0.119618627469731	-5.07296081342822	3.91673179548722e-07	2.92600815909471e-06
LmxM.27.0420	1431.17982109529	-0.620979170889375	0.084293478722	-7.36687084581436	1.74679564218026e-13	4.8463286503586895e-12
LmxM.25.0410	1731.16328508374	-0.643156173777347	0.125288616910652	-5.13339670942337	2.84559227897069e-07	2.19342192504382e-06
LmxM.27.1260	4442.11055649049	-1.27642154632845	0.195350994509296	-6.53399052067643	6.4040000310735e-11	1.0439046825728601e-09
LmxM.23.0370	2341.78814988784	-0.814772874858178	0.134212931015745	-6.07074794277902	1.2731588322794802e-09	1.65209902015479e-08
LmxM.20.0420	860.101892029991	-0.697274678830655	0.123924160163089	-5.62662420235903	1.8377048110394e-08	1.82003457247172e-07
LmxM.16.1420	2968.72418383621	-0.895031215572062	0.189580716380814	-4.72110894324398	2.34562253369808e-06	1.45761158956804e-05
LmxM.18.0940	1439.55440752208	-0.9846804392926	0.10786873084769	-9.12850676516219	6.94505804026468e-20	5.348343761848689e-18
LmxM.10.0390	390.78099611197	-0.824584844565286	0.280145408200468	-2.94341731268079	0.0032461052461526	0.0086963328285508
LmxM.25.0890	814.111148304683	-0.707425907289942	0.147930708647249	-4.78214370605665	1.73435615062909e-06	1.12883844243157e-05
LmxM.31.1370	995.916072115798	-0.659911908084801	0.209193041588175	-3.1545595545378	0.0016074056805297	0.0047351889158321
LmxM.25.0370	374.10770912515	-0.779975735729375	0.144046248483696	-5.41475910646614	6.13712732209562e-08	5.49673142761608e-07
LmxM.18.1580	4095.39052869251	-1.22827440915398	0.0841865942029249	-14.589904969826	3.25650937440625e-48	5.3667274490215005e-45
LmxM.36.1330	655.706885430821	-1.20704837617513	0.107497689878568	-11.2285982846576	2.95123208575239e-29	6.39951378594729e-27
LmxM.28.1140	646.699360076182	-0.712838079962415	0.226440418674427	-3.14801608359205	0.0016438264845314	0.0048203310436082
LmxM.36.6300	65.5049164646666	-1.77365454917766	0.633085528789421	-2.8016033671931	0.0050849348127702	0.0128606086117945
LmxM.21.0845	1795.75624320731	-0.640686358132532	0.111703362544424	-5.73560494096797	9.71649073435405e-09	1.02646004680868e-07
LmxM.25.1710	1954.40580790012	-1.15285268124892	0.149982795621221	-7.68656615896416	1.5113654787708e-14	5.02163368752879e-13
LmxM.32.2390	4850.71000659139	-1.88456471977473	0.218300924931694	-8.63287556094599	5.9828513454244094e-18	3.44746119484595e-16
LmxM.30.1050	2517.58792776442	-0.739413343868126	0.119284233528057	-6.19875168744918	5.69127387362746e-10	7.894965777557281e-09
LmxM.14.0440	497.559597834041	-0.844019309987975	0.121620568894603	-6.9397743955581	3.92726606295007e-12	8.4053694438204e-11
LmxM.31.1150	152.66876510333	-1.03250089654464	0.418235144367358	-2.46870907538498	0.0135601411818319	0.0298040979830075
LmxM.34.3460	679.295609565663	-0.806746528847434	0.118892698568708	-6.7855010321026	1.1568432406005399e-11	2.21169102147296e-10
LmxM.28.0090	755.203880335844	-0.783830840212638	0.145988151017396	-5.36914013055235	7.91129318291104e-08	6.86923665196913e-07
LmxM.20.1010	533.046354724096	-0.601344440919532	0.141226397900453	-4.25801726773069	2.06248021286931e-05	0.000102071092817
LmxM.36.3360	384.231310985034	-1.09758684634658	0.152415576127757	-7.2012774168604	5.96510412672971e-13	1.5077441105599e-11
LmxM.22.0960	425.513469212447	-0.650307336221985	0.266515297133474	-2.44003756338347	0.0146857347770386	0.0318030103975816
LmxM.28.2200	1168.196946869	-1.05131414748289	0.117534104685092	-8.94475820698738	3.7276491912209404e-19	2.6030363843780102e-17
LmxM.30.2760	1678.71936800343	-1.04108930986881	0.157100054528479	-6.62691883203695	3.42765980157813e-11	5.859733768672991e-10
LmxM.18.1610	989.627450659698	-0.786761346627065	0.103054951165111	-7.63438668139824	2.26897958841061e-14	7.30327805019666e-13
LmxM.33.3500	2214.74926274973	-0.766357663804075	0.104873029762481	-7.30748091801812	2.72196964663906e-13	7.2119067164970694e-12
LmxM.36.6760	3338.17370037117	-0.822420916368968	0.116783453755769	-7.0422725987271	1.89129346449184e-12	4.3050436871306e-11
LmxM.23.0080	2090.36108259222	-0.717640998442423	0.140356892455307	-5.112972978302	3.17127677065557e-07	2.41956672131499e-06
LmxM.29.1100	437.938087367174	-0.875534778551378	0.234941420715356	-3.72660885375395	0.0001940732778852	0.0007437971208252
LmxM.23.0680	651.382206183124	-0.753691081240908	0.1464248952935	-5.14728782786684	2.64279658293585e-07	2.05053143534759e-06
LmxM.16.1320	1272.62515079106	-0.879348705065239	0.213997397586846	-4.10915606909835	3.97107647035522e-05	0.0001828026263448
LmxM.33.2700	2566.43246194641	-1.29423421641353	0.150139011141251	-8.62023938066243	6.68142873825361e-18	3.79689467608343e-16
LmxM.05.1140	1703.13680765225	-0.878666435024824	0.139820854434922	-6.28423019281284	3.29482203987719e-10	4.82226174220036e-09
LmxM.23.0660	594.688875127142	-0.738849513785076	0.212426239662506	-3.47814617892276	0.0005048945043802	0.0017305868203383
LmxM.05.0700	2655.1413174071	-0.89299907588048	0.0946652916232651	-9.4332258483321	3.97666792220574e-21	3.4859301786143996e-19
LmxM.15.1490	892.715423831183	-0.674634214984997	0.13924504249122	-4.84494243324701	1.2664839455469e-06	8.49047664658009e-06
LmxM.22.1290	1031.91464209079	-0.662252147134454	0.149642002642186	-4.42557661245677	9.61850118619511e-06	5.1778944275031e-05
LmxM.34.3860	2464.02079246414	-1.11586287965174	0.130899632361063	-8.5245684768146	1.53380549869407e-17	8.05003650270011e-16
LmxM.32.0970	474.758211585736	-0.642155127431408	0.248241208010086	-2.58681921740132	0.0096866399381933	0.0223579588489392
LmxM.08_29.2140	773.173442697177	-0.892136719492548	0.137704906059395	-6.47861245486598	9.25699265962916e-11	1.4782484402198501e-09
LmxM.05.0180	2762.13727765025	-0.763343115502672	0.0660617079441352	-11.5550012141404	6.964649915787991e-31	1.9789212174514799e-28
LmxM.28.2310	2232.28370579723	-0.656920486718719	0.122273282587873	-5.37255950617517	7.76267997073473e-08	6.7615732514645e-07
LmxM.05.0380	43.9384091222572	-1.8713157276882	0.624560671937676	-2.9962112758117	0.0027335696599084	0.0075636715908815
LmxM.23.0690	1592.66452192854	-1.60785282200562	0.355080149759474	-4.52814054262047	5.9505000726066e-06	3.37686780979879e-05
LmxM.28.0550	799.024408689931	-0.770525469758435	0.11382304717363	-6.76950309178637	1.2922545225837899e-11	2.43109070002065e-10
LmxM.30.2280	334.196694568815	-1.67840771156316	0.287981655663361	-5.82817578326985	5.60365365353508e-09	6.26514329784655e-08
LmxM.31.2950	3549.87643233845	-0.951859900143305	0.168303325343004	-5.6556214691742	1.55283361745005e-08	1.57578189751088e-07
LmxM.17.0780	1661.10224826496	-0.606400964399016	0.0849901093629543	-7.13495921989407	9.681585908318629e-13	2.34636082013369e-11
LmxM.07.1000	2905.68702344075	-0.856742817970693	0.100117211740969	-8.55739790464125	1.1544353647165301e-17	6.258254871884339e-16
LmxM.29.1130	317.704415184969	-0.973230699232441	0.159890111009112	-6.08687237184404	1.15137678919942e-09	1.51555027843503e-08
LmxM.05.0670	1869.49120311465	-0.666846620292129	0.204089315023597	-3.26742544172401	0.0010853044919205	0.0033706976457049
LmxM.31.1000	4546.36751479342	-0.823026798329645	0.10198412506079	-8.07014619029245	7.02140461730276e-16	2.93687177901395e-14
LmxM.28.1500	1191.65291599735	-1.14486306676102	0.137172220494379	-8.34617288132284	7.051057234710411e-17	3.3200406636579304e-15
LmxM.32.0420	547.444206795278	-1.23501171044386	0.203373983473193	-6.07261405491745	1.2584465627331302e-09	1.63558354525568e-08
LmxM.24.0761	1365.65968867234	-1.39599704890194	0.226494598850418	-6.16348935465734	7.11591645849765e-10	9.65040836234153e-09
LmxM.15.1560	1207.51134450792	-0.666139605031287	0.119744971026903	-5.56298606378738	2.65197076563077e-08	2.55228071230436e-07
LmxM.08_29.2150	13.4324276892437	-2.36473891979871	0.702475416269663	-3.36629420052323	0.0007618540664059	0.0024812954573853
LmxM.12.0640	342.061546261558	-1.21322090384039	0.257200188020867	-4.71702961485376	2.39312866997178e-06	1.48377578935797e-05
LmxM.17.0290	436.629291404771	-0.655260792511172	0.17596090774778	-3.72389981898941	0.0001961687949351	0.0007492456225339
LmxM.25.0130	1167.87497113503	-1.48254739347188	0.0820381381521509	-18.0714412450742	5.34977373434572e-73	4.40821355710088e-69
LmxM.22.0275	505.914110819335	-1.24690006616209	0.141302081054805	-8.82435741111605	1.1009010342650799e-18	7.25713961787539e-17
LmxM.21.1660	1384.38826983721	-0.779127994261767	0.135875722937026	-5.73412216266821	9.801866730368781e-09	1.03415341687886e-07
LmxM.26.1950	1289.5712149339	-0.6439947329148	0.204270917288027	-3.15265012496494	0.0016179560205318	0.0047614134318507
LmxM.30.1820	424.914523935671	-0.755741030627448	0.254455975545846	-2.97002665787773	0.0029777390774837	0.0080952062020673
LmxM.04.0580	1585.89048609658	-0.774329620962151	0.0901398063709901	-8.59031821940273	8.67287833493402e-18	4.82868361350381e-16
LmxM.18.0830	1499.44915938308	-0.672169989858368	0.0914090444341279	-7.35342978388482	1.9318450931991998e-13	5.288506168757929e-12
LmxM.20.0310	321.281842999525	-0.845919290513113	0.147089143148683	-5.7510654587064	8.8682767484392e-09	9.47586876948246e-08
LmxM.18.1160	589.483129599666	-0.669713284284158	0.158854768514799	-4.21588404645069	2.48801583048293e-05	0.0001204538803947
LmxM.25.1620	3316.80797172695	-1.44874771890377	0.143679050082077	-10.0832217228341	6.55411538957796e-24	7.82694359566991e-22
LmxM.24.0250	517.03219570046	-0.792828330919786	0.139567232116769	-5.680619432622	1.34207797851914e-08	1.3806145496876e-07
LmxM.29.0090	1616.1138597969	-1.25682775433679	0.129672138237996	-9.69235004076239	3.24963815788405e-22	3.26549005133714e-20
LmxM.23.1360	1104.12639163591	-0.621770276187391	0.144535517875348	-4.30185109741418	1.69377124992818e-05	8.54664733582865e-05
LmxM.29.3110	768.302182908559	-0.717876277260188	0.221439678561015	-3.24185928161192	0.0011875264298387	0.0036430445948888
LmxM.25.1780	1085.31621200723	-0.873244178829976	0.164192860483539	-5.31840529641985	1.04680682129396e-07	8.8107131843332e-07
LmxM.23.0510	779.599514204977	-1.19225013482229	0.105970636724971	-11.2507593770204	2.29606672839576e-29	5.1134026599948796e-27
LmxM.17.0250	930.341465665092	-1.23897479762882	0.188725875234642	-6.56494397542684	5.20524291466531e-11	8.630020446044701e-10
LmxM.31.0530	813.805685557951	-0.600436958457153	0.125095756954798	-4.79981873944863	1.58809298335936e-06	1.04436442002244e-05
LmxM.26.1100	2335.02134892362	-1.21806775514487	0.105760515413273	-11.5172259740331	1.08033240476374e-30	2.8715932307268397e-28
LmxM.36.0080	520.414504871397	-0.686481358182948	0.303272877867992	-2.26357649589014	0.0236001748224496	0.0477450136354001
LmxM.08_29.2530	192.68336159639	-0.842588108426558	0.329314061921291	-2.55861563733633	0.0105089862268119	0.0240272049136877
LmxM.31.3330	639.457450474919	-0.63864052767306	0.161703375484809	-3.94945699654276	7.83286810511914e-05	0.0003330383549338
LmxM.16.0540	3658.04173483219	-0.746344878963708	0.119741157147695	-6.23298535559607	4.5762896698245103e-10	6.456956657423621e-09
LmxM.07.0640	2249.94021859503	-1.42737240215532	0.183280012391305	-7.78793270216429	6.811444260750391e-15	2.46167985563961e-13
LmxM.05.1040	3248.98373180408	-1.12814128882823	0.138335432796316	-8.15511446361904	3.48849325935604e-16	1.52899917324967e-14
LmxM.29.0870	1783.54388339207	-1.19793316042966	0.340714389200219	-3.51594531490626	0.0004381912287621	0.0015286603408128
LmxM.28.2170	2308.40569050154	-1.20125866264862	0.155911536524098	-7.70474519993552	1.31104615725434e-14	4.5012584732398797e-13
LmxM.22.0450	1251.5999035789	-1.49503261490901	0.12584110365194	-11.8803202731285	1.49792334087022e-32	5.4220629780251794e-30
LmxM.30.1610	767.540285063026	-1.15104494521876	0.181868589212777	-6.32899254456796	2.4676703166937e-10	3.6970188017374802e-09
LmxM.30.1800a	209.924874185747	-0.744160495170204	0.326323319040155	-2.28043922009335	0.0225816517379485	0.0460918529404746
LmxM.33.1050	739.721636947539	-0.681437129195411	0.104943278566987	-6.49338517435816	8.392874114775969e-11	1.3480951794494e-09
LmxM.07.0100	1382.62385064589	-1.43489638414566	0.1021791920895	-14.0429411781688	8.51059067215279e-45	8.765908392317369e-42
LmxM.04.0090	1226.26000898444	-1.0885198846294	0.161645373823857	-6.73399961211102	1.65061617295787e-11	3.02246161448285e-10
LmxM.03.0690	5469.66691525635	-0.943152667319044	0.151003845781274	-6.24588507954413	4.21406938600476e-10	5.986884782875721e-09
LmxM.32.1690	944.41564701557	-1.19570445028141	0.186842644722892	-6.39952646813993	1.55859561853378e-10	2.4095361907539e-09
LmxM.05.0360	1095.27482005734	-0.79358913308408	0.08501220602942	-9.33500223261403	1.0098912255096401e-20	8.578869791958191e-19
LmxM.05.0800	1705.55417919546	-0.674711585619941	0.120967719669394	-5.57761680110969	2.43836058101321e-08	2.36377543382928e-07
LmxM.25:ncRNA:rfamscan:268125-268216	56.8028113601313	-1.53668846865641	0.509288695406665	-3.01732294966683	0.0025501796372146	0.0071183876052331
LmxM.33.2970	468.958561982419	-0.772111518537786	0.168596486305533	-4.57964181494599	4.65772889764537e-06	2.70087183112049e-05
LmxM.34.0020	318.485621817868	-0.813222274333892	0.188654258324128	-4.31064891700823	1.62776165913955e-05	8.24385745009829e-05
LmxM.18.0740	2723.70392322679	-1.61465268907098	0.126396121659008	-12.7745429834231	2.27479923483219e-37	1.17152160593858e-34
LmxM.01.0470	4377.53507118567	-0.729493938683897	0.144551131032789	-5.04661522515809	4.49705725837075e-07	3.32338581246412e-06
LmxM.28.1990	959.032953781585	-1.11688187561011	0.490891192472829	-2.27521270036216	0.0228931733617975	0.0465892191902227
LmxM.34.0200	1136.49082990225	-0.642456141159104	0.108746277480721	-5.90784490322441	3.4661210687138603e-09	4.13326159279337e-08
LmxM.32.3240	2182.32157456222	-1.34455455154601	0.345088128552384	-3.89626428815823	9.76877885844284e-05	0.000405310865023
LmxM.08_29.0720	1030.08248469994	-0.733057358474585	0.103329875753273	-7.09434084896173	1.29969445732671e-12	3.0598520938206095e-11
LmxM.28.1420	650.855738449232	-0.618471261019383	0.193075928046893	-3.20325411497787	0.0013588402154355	0.0040849483309701
LmxM.05.0820	4709.44596546426	-0.905666588396268	0.128717167791936	-7.03609785650525	1.97698119887431e-12	4.4876928591527094e-11
LmxM.07.0720	1573.17907001776	-0.622206073004226	0.12352980701663	-5.03689018894416	4.73156039375465e-07	3.47487144781981e-06
LmxM.27.1100	879.715795835021	-0.652086928811659	0.0981001424412392	-6.64715577963866	2.9881073399140796e-11	5.18357989071411e-10
LmxM.36.3880	2597.26183718942	-1.17779365330358	0.153289900144561	-7.68343936680009	1.5487328344019802e-14	5.12512391786037e-13
LmxM.23.1220	3207.98440425064	-1.29359537694713	0.167645286548402	-7.71626452243647	1.19788575067087e-14	4.16480109094006e-13
LmxM.21.0840	1083.97327507843	-0.978713482146331	0.170026678418783	-5.75623479355232	8.601073562104511e-09	9.2523297848226e-08
LmxM.13.0250	361.430729815471	-0.743229674347023	0.219567563043214	-3.38497027541698	0.0007118596276742	0.0023388051563141
LmxM.32.1070	1000.96869744002	-1.31261780436745	0.248159420499826	-5.28941356215156	1.22709154756861e-07	1.01927765644812e-06
LmxM.29.3660	931.481196837674	-0.862795431264613	0.118005985900002	-7.31145479345212	2.64265435169123e-13	7.024345760624419e-12
LmxM.07.0870	1656.04971855431	-1.31872467295489	0.339983996067262	-3.87878455518241	0.0001049796774459	0.0004318684683746
LmxM.17.0280	913.685235607977	-0.878743618751303	0.174025467405664	-5.04951161373927	4.42941009945738e-07	3.28222474995763e-06
LmxM.19.0440	3955.0928313012	-0.939528500282068	0.137183103617354	-6.8487187963228	7.451430320475319e-12	1.4975557522126e-10
LmxM.29.0830	1956.54027319625	-0.724527138327379	0.148690308582175	-4.87272603867764	1.10068808361172e-06	7.46474881395931e-06
LmxM.28.2860	352.627960589462	-1.02465247098777	0.194726283126354	-5.26201422086864	1.42485742833207e-07	1.16245794153032e-06
LmxM.36.4920	371.534503276595	-0.954236382986771	0.270366356965379	-3.52941983498695	0.0004164718590618	0.0014627997095779
LmxM.02.0420	936.953780670303	-0.80450627753759	0.21157523342409	-3.80245960038719	0.0001432666343378	0.0005702980999728
LmxM.36.4310	965.294190466722	-0.619712474474063	0.141288079983395	-4.38616247419382	1.15367960036008e-05	6.10553622798141e-05
LmxM.16.0760	3034.29078402249	-0.831867069042332	0.144746308500994	-5.74706932188616	9.08035089918886e-09	9.67944261440054e-08
LmxM.07.0470	868.037671538448	-0.662930383933599	0.10479533887005	-6.32595295822894	2.51674485482292e-10	3.7636982946898e-09
LmxM.32.3060	1228.41645568539	-0.796679654807391	0.20558484490316	-3.87518669084125	0.0001065429840005	0.0004378624379873
LmxM.10.1320	485.121124611096	-1.2928540086369	0.232188866014278	-5.56811371203905	2.57511760655451e-08	2.4817507693578e-07
LmxM.19.0210	1177.9868208365	-1.43289149911549	0.18937616700354	-7.5663771307015	3.8377683555461e-14	1.19784891097348e-12
LmxM.36.3890	370.689629785414	-0.686396915008972	0.148450916794001	-4.62372971371713	3.76900917513749e-06	2.22787916808701e-05
LmxM.34.5090	1226.35216365412	-0.706793245656215	0.115351291884072	-6.12731105228145	8.93766388495214e-10	1.19168851799362e-08
LmxM.26.0930	779.791959722384	-0.689346875044829	0.089799548334658	-7.67650715208305	1.63484931090609e-14	5.3456977467723e-13
LmxM.09.0970	13927.3415627805	-0.658371257993563	0.122165638894558	-5.38916886901241	7.07842709997203e-08	6.23161757580034e-07
LmxM.11.0480	1206.43757248378	-1.0815866947023	0.157143209838384	-6.88280897287682	5.86836995526842e-12	1.21495900581437e-10
LmxM.23.0040	9550.84408812353	-0.777831370391334	0.132963565452353	-5.84995872925857	4.91694999293017e-09	5.59608673228516e-08
LmxM.36.0620	2624.60067434756	-0.684890599271546	0.159449230539956	-4.29535217543694	1.74416227924732e-05	8.77405200305123e-05
LmxM.07.1050	2985.77264438963	-0.896667447720347	0.199825980565336	-4.48724157481199	7.21512480969461e-06	4.01164834223236e-05
LmxM.36.2380	88.7677346250336	-1.04955573418566	0.45649925001426	-2.29914010626058	0.0214969847285849	0.0440963789304306
LmxM.22.0110	1943.89332411891	-0.609798410579684	0.104515242637642	-5.83454044778787	5.393902262138441e-09	6.063540878584e-08
LmxM.34.4710	1833.89707907685	-0.807324204903153	0.100255896699436	-8.0526356202617	8.10298709031268e-16	3.30537691208794e-14
LmxM.22.1450	604.325006235515	-0.656917176352051	0.182014554485994	-3.60914641253374	0.0003072061947785	0.0011175592866596
LmxM.11.0580	433.507102240316	-0.996670729997343	0.217341655368085	-4.58573267195101	4.5239714949356e-06	2.62957034410203e-05
LmxM.24.2110	2233.2980433007	-1.51618013217128	0.226328741163675	-6.69901720999198	2.09825884230079e-11	3.75862018707794e-10
LmxM.09.1350	434.306426979201	-0.874488884820837	0.119418837565531	-7.32287219209415	2.4271894957612996e-13	6.51467148047983e-12

## Sheet: T7-vs-DAC4_up
Supplementary Table 4. List of DE genes in DACs mutants compared to parental cells.
T7-vs-DAC4_up
	baseMean	log2FoldChange	lfcSE	stat	pvalue	padj
LmxM.15.1000	19985.4886874891	0.808983117084257	0.211873933246228	3.81822862628459	0.0001344133324353	0.0005386993478925
LmxM.34.0800	1580.59213425765	0.868139194801004	0.105388443905722	8.23751791588855	1.75820000208889e-16	7.96020220725961e-15
LmxM.22.0460	9145.70740221852	0.710076619108	0.197185930695529	3.60105113282355	0.0003169332309591	0.0011484300013645
LmxM.27.0690	1261.97810666526	0.76123683243623	0.0795947659901825	9.56390565342103	1.1339474166651801e-21	1.08647985038617e-19
LmxM.26.0410	501.272840760948	0.760312582681054	0.192718246277688	3.94520289264941	7.97324380527014e-05	0.0003381344773825
LmxM.25.1520	1823.59425227704	0.776816275942338	0.111391470681499	6.97375006533026	3.0860213742891297e-12	6.76298301174001e-11
LmxM.13.1510	409.267764584233	0.840747022099004	0.201552944009977	4.17134577829529	3.02805963962283e-05	0.0001438939528863
LmxM.15.0860	699.39246557314	0.661410244484087	0.142568177061415	4.63925581512603	3.49666011285594e-06	2.08182654118013e-05
LmxM.24.1860	1411.6069497114	1.92141826418754	0.171409006727162	11.2095525251245	3.66039188169558e-29	7.65323069006326e-27
LmxM.10.0465	184.882065783696	0.872794513880247	0.252445001126208	3.45736501014691	0.0005454854530185	0.0018497119888365
LmxM.21.0880	939.046590026019	0.617282619954439	0.113268310460064	5.44973803747237	5.04440661602803e-08	4.59291828906861e-07
LmxM.36.2450	415.466271661617	0.614359772267812	0.192707367672573	3.18804506380713	0.0014323821134759	0.0042732905919775
LmxM.14.0510	444.208696773152	0.916568751476636	0.178825715124672	5.1254862917094	2.96770759667676e-07	2.27478238108061e-06
LmxM.33.3320	1110.01496701104	0.932437043005181	0.193624528090823	4.81569691711684	1.46687026192536e-06	9.70844253675902e-06
LmxM.08.1000	2166.17985825916	0.736787843269492	0.0882097460534517	8.35268069837801	6.67308652759047e-17	3.1601283326060602e-15
LmxM.21.1130	1272.36711853173	0.649718797187511	0.133958480669907	4.85015053872187	1.23367808013083e-06	8.29837337165554e-06
LmxM.14.0730a	93.5046370286123	0.83303667430599	0.362220387748972	2.29980614697841	0.021459205055718	0.0440298430426086
LmxM.16.0370	1201.66786266607	0.983545948626262	0.160055743038329	6.14502129043087	7.99527898657779e-10	1.07298206595116e-08
LmxM.15.0010	28253.2233951932	1.5451087915994	0.246806688489201	6.26040080622451	3.83989259398591e-10	5.521939786115871e-09
LmxM.30.0460	14.972066549157	1.46401612444681	0.544321690518455	2.68961562610589	0.0071534360652674	0.0172049950898434
LmxM.31.1330	810.80393375389	0.656597571088479	0.115091270793236	5.70501625851425	1.16331984156939e-08	1.2119993214328e-07
LmxM.27.2080	134.251518629917	0.912195698554607	0.271400154956	3.36107287301473	0.0007764033805761	0.0025226986813672
LmxM.31.3700	1717.55161114673	0.781562958487351	0.12717315978357	6.14565966448784	7.96318641660377e-10	1.07041853299861e-08
LmxM.30.0600	1263.79588607922	0.731983663328945	0.134933758929255	5.42476300325051	5.80314854346759e-08	5.21460676097851e-07
LmxM.32.1640	401.243997419252	0.959399022224874	0.273302438017991	3.51039320828056	0.0004474444968152	0.0015556720058048
LmxM.30.0450e	70.6781559791178	1.2155521959224	0.321185362049581	3.7845815518042	0.0001539674149697	0.0006081934320953
LmxM.11:ncRNA:rfamscan:292364-292455	5582.67730536212	0.778399860250687	0.311564810644385	2.4983561482466	0.0124770770574622	0.0278093359354852
LmxM.33.1560a	58.7111090495332	1.87926781255641	0.391194762141796	4.80391864724209	1.55590067142288e-06	1.02482985871499e-05
LmxM.16.0120	1245.73568364118	0.654932406015559	0.0864719789042012	7.57392642466448	3.62109547977103e-14	1.13451812750241e-12
LmxM.19.0860	101.283800567819	0.75189935588799	0.28068153370958	2.67883442829544	0.0073878915297176	0.0176914345262636
LmxM.34.2610	128.443609932721	1.98233057072827	0.327492363675179	6.05305891252608	1.4212086151621502e-09	1.83554216127526e-08
LmxM.36.3740	15765.1790924396	0.725623021592914	0.204644532754236	3.5457728180031	0.0003914635366453	0.001383809327309
LmxM.32.0440	422.059587480885	0.630463767307152	0.155027589433523	4.06678430343201	4.76663241448609e-05	0.0002150988559439
LmxM.16.1170	24119.5596571431	0.768048060295627	0.185489611542101	4.14065269699108	3.46318978268186e-05	0.0001621402489164
LmxM.27.2430	520.792855587385	1.02296509316577	0.120676580932157	8.47691478548661	2.3124419077416102e-17	1.1835106409808e-15
LmxM.34.3660	1382.68646270371	0.802483324118375	0.0755244346956137	10.6254793875999	2.26843656320642e-26	3.46146616311498e-24
LmxM.10.1228	389.49987367988	1.02167991969836	0.236840100754666	4.31379617067753	1.60474910355652e-05	8.14733987264677e-05
LmxM.04.0230	1064.36383083548	0.720843351605685	0.172217792516535	4.18564970014046	2.84351590031271e-05	0.0001359870633695
LmxM.17.0237	620.90335194278	0.906296452944867	0.125808905021538	7.20375439870265	5.85768363292421e-13	1.4851480964706298e-11
LmxM.27.2140	1664.04318303831	0.631282436939386	0.176477156975734	3.57713399148983	0.0003473821287738	0.0012459459099896
LmxM.31:ncRNA:rfamscan:482645-482735	287.18428473814	1.91065090392541	0.327454961404282	5.83485098448848	5.38386620440674e-09	6.06052698419556e-08
LmxM.03.0290	664.138712022845	1.32266583579496	0.14902884918852	8.87523350678093	6.97868418098553e-19	4.71347193863285e-17
LmxM.31.3410	1019.87256254922	0.681682509807151	0.113769862122914	5.99176703818698	2.0757313354777502e-09	2.59939607968643e-08
LmxM.36.2440	651.994261366422	0.606064022954124	0.140535822332866	4.31252340430777	1.61401790799036e-05	8.18935194694617e-05
LmxM.31.0160	1030.19312895413	0.621182250457557	0.101386560228929	6.12686976513393	8.9624772382646e-10	1.19306643688692e-08
LmxM.03.0700	2649.50960713771	0.69313984427571	0.0909220371154569	7.62345264433011	2.46978931942152e-14	7.91870194242541e-13
LmxM.27.2337	912.778022281476	1.48089831588183	0.135058970505423	10.964827514529	5.64080096382951e-28	1.08093488237105e-25
LmxM.27.1790	1086.3483243499	0.852419212933265	0.127282125757398	6.69708498236422	2.1261798899085898e-11	3.792085814919e-10
LmxM.01.0760	811.070381056262	0.737847283867999	0.164839002851728	4.4761692991536	7.59942314992129e-06	4.18577852642724e-05
LmxM.01.0050	913.890169774165	0.689500750350056	0.197362508189835	3.49357513072774	0.0004765988564547	0.0016445454678339
LmxM.31.0490	1392.56505333094	0.66250868544869	0.147842074983487	4.48119174140844	7.42273859703785e-06	4.11320551712118e-05
LmxM.27.1700	912.490110557778	1.14019617365458	0.107642782663129	10.5924070842989	3.23172923329706e-26	4.6718331372575e-24
LmxM.18.0760	550.376559536055	0.767332665510678	0.205820899488803	3.72815718625515	0.0001928850634906	0.0007399315284743
LmxM.26.2510	1060.91818092877	0.702392775416825	0.166393665457325	4.22127112523385	2.42928532557066e-05	0.0001180761445283
LmxM.07.0730	1300.03929831189	0.887077652002695	0.119980159396949	7.39353620183017	1.42974499529602e-13	4.0484875468175995e-12
LmxM.01:ncRNA:rfamscan:118986-119169	426.424199165131	0.822972597607326	0.238800279772732	3.4462798719941	0.0005683614005942	0.0019178124246095
LmxM.26.1630	4656.90155047818	0.702010497174458	0.196744808415858	3.56812717360563	0.0003595419950814	0.0012819671308833
LmxM.31.0750	28921.0369226859	0.718612990817806	0.150812610246111	4.76493968007782	1.88910154465995e-06	1.21421191326037e-05
LmxM.02.0300	1299.7378534334	0.635965097136906	0.215270643425682	2.95425835597718	0.0031342149870722	0.0084508938133099
LmxM.23.0730	67.8763475732591	0.777269027348032	0.335528041948486	2.31655459506233	0.0205280071792264	0.0424575248887614
LmxM.23.0460	612.428918102201	0.790574277711597	0.161673630804037	4.88993952681031	1.00866960467844e-06	6.89745854153558e-06
LmxM.29.2790	1568.95083038247	0.799073373844576	0.161579808223691	4.94537889745691	7.59959031862632e-07	5.36594894819887e-06
LmxM.36.3520	1135.12237775185	0.639740689025402	0.0924489114808104	6.91993749605361	4.51842961309541e-12	9.54663077228364e-11
LmxM.11.1020	1400.72736326607	0.924294396316718	0.0966930112842377	9.55906103285657	1.1882988557797401e-21	1.12546926110633e-19
LmxM.25.1910	896.844722080225	0.693873391530657	0.122546574453496	5.66211984810694	1.49514336860964e-08	1.52286543354059e-07
LmxM.36.4840	1107.45355785279	1.06517906102769	0.0900179710555385	11.8329601138256	2.63676180790059e-32	9.052882207125359e-30
LmxM.08.1070partial	42.3067954795715	1.26725173145985	0.451643401410213	2.80586792036146	0.0050181256823867	0.0127265437500756
LmxM.08_29.1950	1212.66581166682	0.659568865901106	0.117816836983632	5.59825643590088	2.16518322782209e-08	2.12141614711701e-07
LmxM.23.1665	5099.32781221101	2.16199582026939	0.18288086467522	11.8218810049313	3.00871371403776e-32	9.53530807833505e-30
LmxM.21.0990	765.166130097079	0.694869184929803	0.190878943439924	3.64036583819683	0.000272250938474	0.0010041843030555
LmxM.12:ncRNA:rfamscan:291967-292048	145.832499091379	0.742483876619448	0.305096002158933	2.43360736084856	0.0149492013794757	0.0323395692745811
LmxM.10.0250	1292.06411655708	0.945967404738377	0.159155328905354	5.94367409024	2.7870345880749803e-09	3.3871924787224e-08
LmxM.20.0265	334.0677371956	0.652201120302822	0.249387652863892	2.6152101469866	0.0089172571933985	0.020856712822482
LmxM.09.0700	1152.23117346442	0.705403473524824	0.127403422744585	5.53677019289346	3.0810038253769e-08	2.90807233918736e-07
LmxM.34.3820	970.075875149279	0.606793229452918	0.160704277990719	3.77583743905039	0.0001594709740933	0.0006269278752526
LmxM.11.0040	1652.18371955606	0.896994112424524	0.151647787412688	5.9149831839187	3.3190949126726505e-09	3.96942555593942e-08
LmxM.21.0905	633.129179585319	0.633675856325655	0.118870144616866	5.33082430721418	9.77679703686271e-08	8.28814892836921e-07
LmxM.36.1270	239.94811241919	0.937171105615478	0.197662046411399	4.74127999092411	2.12372195285208e-06	1.34404522976199e-05
LmxM.33.1820	26.3617597709552	1.29390311072507	0.453297748458298	2.85442209921788	0.0043115204201621	0.0111265043100958
LmxM.26:ncRNA:rfamscan:500305-500388	103.780148109621	0.805064110720583	0.332558073845291	2.42082262929844	0.0154854310360615	0.0333246152356089
LmxM.03.0560	880.89574936385	0.656680309731815	0.141301675954363	4.64736391338985	3.36203747033679e-06	2.01185103526326e-05
LmxM.17:ncRNA:rfamscan:244450-244607	482.867004734327	0.620540488447209	0.148628003761676	4.17512496125724	2.97822526526166e-05	0.0001419350849378
LmxM.33.2900	3376.50700273411	0.704888189467981	0.105541491261755	6.67877799565837	2.40942827549063e-11	4.24224123718864e-10
LmxM.24.0800	643.830056544573	0.966144934400284	0.146372920445851	6.60057155010237	4.09575653733151e-11	6.91578562860895e-10
LmxM.21.1855	1241.89805860056	1.38682393559906	0.221809481109285	6.25232036368983	4.0439877014746e-10	5.78514907294283e-09
LmxM.08.0910	1863.40439125558	0.878140878106967	0.0807108624706438	10.8800829433134	1.43432393372784e-27	2.62640649198165e-25
LmxM.10.1300	1309.46784047178	0.639635381029003	0.190680126116094	3.35449422054381	0.000795102140615	0.0025743189149973
LmxM.26.1780	29.2498139410443	1.31575271053768	0.480726008525632	2.73701170147429	0.0062000087639893	0.0152501708105289
LmxM.14.1230	1034.83933984853	0.692967872275167	0.104505799280311	6.63090351968365	3.33638266660371e-11	5.72745691100303e-10
LmxM.29.1850	645.389425128084	0.97858587060564	0.149051306610552	6.56542966887594	5.18830374855448e-11	8.61927880808244e-10
LmxM.21.1860	3107.51045916452	0.879476461193604	0.118484294986117	7.42272603551933	1.1473394750569e-13	3.2826657203016797e-12
LmxM.22.1170	1285.26819317972	0.643506731903981	0.154404660004079	4.16766392858209	3.07737192621379e-05	0.0001457330153563
LmxM.30.1980	134.205270175542	1.054907517176	0.348930590406304	3.02325891217401	0.0025006819281579	0.0069944396089686
LmxM.27.0850	1816.5421513916	0.901167422716698	0.0893094440130084	10.090393380855	6.09248694084363e-24	7.38266064596346e-22
LmxM.23.0355	685.842403104885	0.775984655250162	0.142192717976428	5.45727422819782	4.83499334392105e-08	4.4217919149733e-07
LmxM.30.0450c	258.280599652304	0.95493778420436	0.185821885685613	5.13899523019583	2.76211409404757e-07	2.13306655435351e-06
LmxM.12.0420	287.40676285357	0.869413253005198	0.166822747709276	5.21159892726583	1.87219961825484e-07	1.49340995686543e-06
LmxM.08_29.0180	1588.53285473701	0.640000926258456	0.150340542236742	4.25700823435002	2.07180727657521e-05	0.0001024711402099
LmxM.24.1690	748.474178913256	0.680775209552035	0.121508278378203	5.60270640518068	2.11030506167083e-08	2.07257612731437e-07
LmxM.12.0905	124.621788207636	0.697842228005577	0.243665409060954	2.86393637363196	0.0041841204797244	0.0108351035293603
LmxM.14.0880	1598.20243983523	0.864473749317395	0.0822994110499404	10.5040089386888	8.278779401569639e-26	1.1562227503209101e-23
LmxM.25.2380	293.456979058872	0.668405077651054	0.258177748401452	2.58893371636242	0.0096273623929636	0.0222398278996413
LmxM.22.1150	2353.01029555449	0.673036032948302	0.125376833763071	5.36810519732986	7.95681414314564e-08	6.90148931994948e-07
LmxM.31.0630	3692.63616132102	0.756565702722636	0.144630053298192	5.23104075169481	1.68558342236336e-07	1.35504462441698e-06
LmxM.34.2300	1756.7010922177	0.786809018684785	0.147061526455045	5.35020299089104	8.78556302934688e-08	7.55668469330044e-07
LmxM.34.3300	2357.63368457761	0.829364786126569	0.125685345857292	6.59873894183545	4.1466974393595695e-11	6.98748198370611e-10
LmxM.18.1400	16941.3121808268	0.819534259295303	0.211981956786563	3.86605667632582	0.0001106092440202	0.0004534428710082
LmxM.34.0610	3547.4619368455	0.760500917042432	0.116361525747616	6.5356733005713	6.332400919470829e-11	1.03529729318333e-09
LmxM.32.1560	1049.93883929443	0.735060615878696	0.154781663581067	4.74901612291889	2.04408647951567e-06	1.29963523080317e-05
LmxM.26.0730	1773.18648498285	0.749956523681994	0.105688363971394	7.09592329279483	1.28490734900654e-12	3.0337067495168696e-11
LmxM.23.0860	2241.81717036716	0.710814418901278	0.132625142907331	5.35957514027296	8.34178935819631e-08	7.20506753789702e-07
LmxM.08_29.0555	486.179282312146	0.768157518917264	0.168736287228517	4.55241448969989	5.30337190652083e-06	3.02765102303362e-05
LmxM.03.0100	1848.10302334832	0.853726092461166	0.0961844295877812	8.87592821540857	6.93525652793767e-19	4.71347193863285e-17
LmxM.28.0620	1767.43612813624	0.768945573273984	0.10968497332284	7.010491501062	2.37482368932262e-12	5.3031293224982e-11
LmxM.28.1190	1482.99694344797	0.603232561718059	0.127645009695014	4.72586091034332	2.29142458892895e-06	1.4282125937273e-05
LmxM.28.2660	718.754454940652	0.759697925149048	0.197223673471397	3.85196113517897	0.0001171756232663	0.0004770390986732
LmxM.25.0940	858.404005948681	0.646731237090438	0.1116708412803	5.79140650930627	6.979940885765051e-09	7.64823309823191e-08
LmxM.01.0800	1254.27091764958	0.817710971700524	0.153457787128572	5.32857267787536	9.89875864094668e-08	8.38291584803706e-07
LmxM.08.0950	1390.83388117775	0.74771753848264	0.141153342544189	5.29720037092684	1.17591638248117e-07	9.79732152845786e-07
LmxM.36.3320	533.13930652748	0.821015477053911	0.161828139637815	5.07337894936823	3.90813121695855e-07	2.9222324163102e-06
LmxM.14.1045	965.466374861712	0.751193546844325	0.12816134028645	5.8613115715344	4.592253826801991e-09	5.26288894754498e-08
LmxM.30.0460e	115.609111637247	1.22517779726181	0.25862756083163	4.73722828813057	2.16661055989727e-06	1.36489839553161e-05
LmxM.07.0950	1292.9623980569	0.896604299793459	0.133884669415113	6.69684067421876	2.1297359892669798e-11	3.792085814919e-10
LmxM.19.0770	1459.11931719617	0.734382869755615	0.130514581043282	5.62682624336106	1.83555455600693e-08	1.82003457247172e-07
LmxM.27.2350	332.759935120023	1.06787366155028	0.21780732359606	4.90283634140207	9.44626820048871e-07	6.52449706387485e-06
LmxM.06.0010	17002.7624219513	1.51976738829714	0.217045368331905	7.00207242373914	2.52203640005301e-12	5.60150402599375e-11
LmxM.10.0970	10754.4066142583	0.822238409244412	0.245216610748496	3.35311056920093	0.0007990877706345	0.002583163291498
LmxM.34.0080	647.43848717419	0.669512837540909	0.121224360505841	5.52292323710504	3.3340542442371e-08	3.12188715596746e-07
LmxM.30.1170	2761.03851388384	0.785337812421219	0.168541510973985	4.65961060799104	3.16808124172396e-06	1.91105339910728e-05
LmxM.36.2480	1584.72029864139	0.965866788347575	0.174426874854373	5.53737369401341	3.07040970034474e-08	2.90139632234411e-07
LmxM.23.0610	676.829183395815	0.750611986016449	0.267728257996292	2.80363377266977	0.0050530265436958	0.0127995507900565
LmxM.34.2820	225.358343228484	1.48935193966146	0.269362338155102	5.5291766097006	3.21737314416233e-08	3.02565718366621e-07
LmxM.16.0070	1054.45185114985	0.67059652781269	0.171636870353482	3.90706569300415	9.34237598686461e-05	0.0003901732292537
LmxM.32.2100	881.841680971668	0.80631574202958	0.142491575123464	5.65869063718986	1.52532220889975e-08	1.5497725032471e-07
LmxM.20.1410	1240.34905069019	0.66849521785835	0.110885238911475	6.02871242755805	1.65271062088529e-09	2.10484320186937e-08
LmxM.33.1070	979.648148075291	0.988278826384445	0.111248001939891	8.88356473061357	6.47512736841859e-19	4.4462541263140997e-17
LmxM.26.1260	2410.05449016331	1.74617444999962	0.15315856766125	11.4010889280561	4.12921627408674e-30	9.7213548852785e-28
LmxM.24.1410	2308.61241945913	0.783555048684842	0.106441309836167	7.36138112064647	1.82017070560881e-13	5.03295523966999e-12
LmxM.08_29.2720	1370.44380636576	0.657105406656592	0.146045063044189	4.49933323975335	6.81669290266513e-06	3.83148359604097e-05
LmxM.36.1980	1181.57122279798	0.78575627094789	0.142855708092896	5.50034913856525	3.79039943202349e-08	3.52515703384577e-07
LmxM.36.2050	1325.75719524917	0.644459109951879	0.111887023234867	5.75990933818184	8.41591272604675e-09	9.07684828044833e-08
LmxM.33.1350	482.759337252861	0.704401925169167	0.148952102943414	4.72904988415481	2.2557296054243e-06	1.40948661515591e-05
LmxM.20.0200	866.042308730447	0.831658724066122	0.122761590017468	6.77458416714694	1.2476458455733699e-11	2.35254045023446e-10
LmxM.17.0340	1475.0021814367	0.846915380474278	0.170453029004873	4.96861443541768	6.74330004335135e-07	4.79420123875885e-06
LmxM.33.1600	11.2373142746775	1.89869238138018	0.622064352378532	3.05224431221677	0.0022713714798467	0.0064427197913724
LmxM.34.5100	11507.6626822902	0.689041297285788	0.231205089051968	2.98021682875204	0.0028804441535987	0.0078748705460031
LmxM.08.0480	1085.48796783662	0.697525497662422	0.133788457813466	5.21364480211697	1.8516586568769e-07	1.47845613688621e-06
LmxM.08.1030a	463.580339725022	1.07009831592299	0.135077221970601	7.92212262224261	2.33489874274533e-15	9.118277554607371e-14
LmxM.32.1760	32.9573023176332	2.62887125905206	0.532443546325484	4.93737087658309	7.91827993191824e-07	5.57187247130712e-06
LmxM.16.0630	1196.54894397043	0.612629616216838	0.11379893065558	5.38343912976655	7.30759670099174e-08	6.41263011886815e-07
LmxM.09:ncRNA:rfamscan:190672-190760	155.225966699637	0.881155258612755	0.329014606901231	2.67816455601095	0.0074026839672422	0.0177217071150715
LmxM.09.0003	454.149324829187	0.785058993086776	0.206691148365658	3.7982226103748	0.0001457374067944	0.0005784567591454
LmxM.19.0830	68.0136580367687	2.19612252103722	0.459303148621466	4.78142274362494	1.74058895284352e-06	1.13126634206041e-05
LmxM.03.0830	312.5302924754	0.753465274769216	0.200175055358143	3.76403180416838	0.0001671956052588	0.0006535539788106
LmxM.31.2390	1524.11693467731	0.71480299966126	0.113166779111325	6.31636780046633	2.6778231045487e-10	3.9973301415727e-09
LmxM.33.1730	388.998003530213	1.05167430371345	0.146927504007298	7.1577769650345	8.19958134981586e-13	2.0228907282180497e-11
LmxM.36.0200	1350.48130383477	0.62883305640523	0.156786284345548	4.01076573139088	6.05221401530532e-05	0.0002644233482826
LmxM.19.0850	1023.97457856235	1.76523232622084	0.237946088593467	7.41862300261115	1.18344240615918e-13	3.3626087678454e-12
LmxM.00:ncRNA:rfamscan:422971-423050	18.8037134962759	2.14150285414095	0.536582453446531	3.99100425365353	6.57941001498474e-05	0.0002847391729174
LmxM.31.0640	1018.00164628287	0.786054739979513	0.21186474502506	3.71017244934516	0.0002071181150708	0.0007882925026252
LmxM.10.0350	700.537224950328	0.853273680564512	0.150227101912049	5.67989177521421	1.34779994927005e-08	1.38356275344228e-07
LmxM.18.0420	430.729796752558	0.604957804320547	0.177655291199473	3.40523381114101	0.0006610742702031	0.0021929355823163
LmxM.25:ncRNA:rfamscan:230340-230444	174.215352083841	0.900732736501164	0.223884950745717	4.02319465198979	5.7414006352907e-05	0.0002524500599508
LmxM.30.0450h	1090.7908093389	1.47967434903229	0.128516145972197	11.5135288086868	1.1276766161607398e-30	2.90376728661391e-28
LmxM.29.2090	301.412686282669	1.53396632063145	0.256410341869193	5.98246665656723	2.1978351262688703e-09	2.73981262336694e-08
LmxM.27.1880	1399.49372245307	0.764574018330073	0.141395231957147	5.40735361261541	6.39627826538215e-08	5.69787382775664e-07
LmxM.22.1120	762.440961167419	0.619553668862243	0.126885237079529	4.88278765223035	1.04596492642974e-06	7.11705284374984e-06
LmxM.22.0630	1252.56847668456	0.652079881201859	0.136188260105731	4.78807703906057	1.68387011380843e-06	1.09945243564037e-05
LmxM.21.0901	482.262700033912	0.800713668578199	0.153825019771364	5.20535391296118	1.93627222246615e-07	1.54153460030155e-06
LmxM.08.0135	715.808541006827	0.753799116841191	0.130131648539495	5.79258869999186	6.9309699250494605e-09	7.60468604293043e-08
LmxM.11.0475	168.16970445263	0.671155753113356	0.224885329057605	2.98443547173964	0.0028410211830042	0.0078059401627057
LmxM.29.3650	22762.849330514	0.682980513552349	0.238219657087701	2.86701996762974	0.0041435686862148	0.0107401717440736
LmxM.25.1190	13652.1317713527	0.735338125923384	0.202792649490282	3.62605906955529	0.0002877795520913	0.0010562599150257
LmxM.16.1260	4287.68519969088	0.69505894607271	0.132526397775984	5.24468300457093	1.56551250316608e-07	1.269667620678e-06
LmxM.01.0560	1420.49326194662	0.608736155879959	0.120402146905438	5.05585798530693	4.28460092110046e-07	3.18064068377187e-06
LmxM.08_29.2460	8722.90556472554	0.743635166304435	0.183652879793789	4.04913425337742	5.14074498118825e-05	0.0002302159708966
LmxM.25.2040	1799.95632011486	0.673861350942783	0.137779983913579	4.89085084641507	1.00401025519326e-06	6.87701122426638e-06
LmxM.36.2530	1102.36897715051	0.81020024935636	0.140515794390523	5.76590164024297	8.12224219585149e-09	8.79464858000214e-08
LmxM.24.2080	6301.40034216324	0.67054633055105	0.164583163091343	4.07420976700331	4.61708523278063e-05	0.0002092672294725
LmxM.30.0450b	2038.90588903496	1.83549654505221	0.146819409040131	12.5017295536894	7.30445986965412e-36	3.0094374662975e-33
LmxM.30.1860	252.343408936983	0.731767888480217	0.286180646377202	2.55701389225219	0.0105575001118198	0.0241180484949807
LmxM.29.2960	934.957488581426	0.899471633676833	0.0943571709283295	9.53262613564411	1.5335383511296701e-21	1.41981528239421e-19
LmxM.30.0451	158.871156409009	1.12255923106201	0.336408733525723	3.33689086872702	0.0008472120725863	0.0027163531043236
LmxM.04:ncRNA:rfamscan:119913-119998	115.206190317064	1.98367658598258	0.35593813444614	5.5730937317781	2.50254835020197e-08	2.42314904884421e-07
LmxM.32.0794	189.630666350076	0.998556308191701	0.415698631777173	2.40211593654453	0.0163005413375512	0.0348060276292879
LmxM.08.1090	452.680046182031	9.13739557229907	0.657384198930551	13.8996276259211	6.36717543082886e-44	5.77714290107907e-41
LmxM.31.2570	549.449018506732	0.761096712119272	0.114746206585291	6.63287035596727	3.2922095790524894e-11	5.66342524663727e-10
LmxM.23.0260	817.181817916271	0.704802907075153	0.158126985396066	4.45719562230196	8.30388201459527e-06	4.54946727395379e-05
LmxM.24.0650	1491.50067248917	1.25638895209583	0.128981507821201	9.74084559344339	2.01867506961772e-22	2.1055547561582302e-20
LmxM.25.0860	663.323755957772	0.964444404085932	0.125688997786198	7.67326035749361	1.6767865120015702e-14	5.461154489681e-13
LmxM.30.1700	930.835812287584	0.638337863452319	0.10931645119641	5.83935772215484	5.24024455710657e-09	5.91501577404907e-08
LmxM.28.1995	242.359847050982	0.728949675710551	0.217895749663651	3.34540566686488	0.0008216230267774	0.0026466668258976
LmxM.33.1460	926.127427858045	1.11623953284881	0.10328983556714	10.8068671686793	3.19391957356148e-27	5.59955261407375e-25
LmxM.26.2330	8653.34564395489	0.76440628608747	0.188588858620349	4.0532950444666	5.05012448761188e-05	0.0002271453372157
LmxM.33.0670	1824.60479741956	0.620006501170315	0.128529293297259	4.82385365440685	1.40810751049557e-06	9.35671528851975e-06
LmxM.23.1267	950.803255830462	1.55813005750436	0.124459172211919	12.5192063374108	5.8618349945170594e-36	2.54218528183266e-33
LmxM.30.2240	331.395645864557	0.937366632177085	0.198905397697959	4.71262541401964	2.44545480386021e-06	1.51226406690825e-05
LmxM.28.0580	2910.41335872596	0.919619422291433	0.132867946038137	6.92130381866125	4.47505557019522e-12	9.4792950895652e-11
LmxM.13.0700	402.049332809966	0.691677421580471	0.166706661291852	4.14906888675286	3.33830350114339e-05	0.0001566493214659
LmxM.08.1060	38.7126303386513	1.383482636557	0.395616152129498	3.49703274022073	0.0004704640890443	0.0016261007104552
LmxM.33.1900	168.784232714999	1.1870137738835	0.234549880347388	5.06081594296885	4.1746606802325e-07	3.10182182192208e-06
LmxM.08_29.0160	2684.18603987693	1.03498455186349	0.165873682093927	6.23959472532489	4.38706025611513e-10	6.211233077386381e-09
LmxM.33.1555	538.201799317402	0.655716016428529	0.150314535623106	4.36229279963085	1.28706459703836e-05	6.71653722583669e-05
LmxM.25.0840	337.490848855796	1.53975066290508	0.179456483449471	8.58007820786604	9.480865778606729e-18	5.24310966548453e-16
LmxM.08.1040b	66.1225899147074	1.70203982208718	0.339665216984594	5.0109335221227	5.41666256379626e-07	3.93939095548819e-06
LmxM.11.1130	1058.72826327667	0.784669354183858	0.230915936734236	3.3980736248921	0.0006786215421401	0.0022421176853387
LmxM.33.3745	428.95280184286	0.830611367310895	0.271018313806926	3.06477948166493	0.0021783054387292	0.0062022241932027
LmxM.32.2760	910.764479100181	0.677672611920724	0.10781252359736	6.28565763335234	3.26468708291528e-10	4.78665864114269e-09
LmxM.33.1990	655.309159797045	0.901889960260241	0.11720601840604	7.69491168222951	1.415919409036e-14	4.78162947969535e-13
LmxM.27.1350	1016.40035697201	0.642449963166311	0.121333975139286	5.29488927094664	1.19088548939494e-07	9.91201659860028e-07
LmxM.28.1090	1136.13762214826	0.657765587465616	0.117108546665374	5.6167171926838	1.94619571979986e-08	1.91825989607068e-07
LmxM.01.0450	261.429448422465	1.03085466965112	0.216209640004963	4.7678478611197	1.86204307994356e-06	1.20056611727191e-05
LmxM.28.1900	1127.24394863423	0.644034519270251	0.1035504169253	6.21952608587609	4.98658718168814e-10	7.01185637834647e-09
LmxM.05.0900	719.063041278897	0.618057001845727	0.233901148509189	2.64238549397908	0.0082324296829606	0.0194188579317338
LmxM.28.2700	1977.76933036991	0.823158084216987	0.141380824229276	5.82227532414212	5.80518119384091e-09	6.46414770773637e-08
LmxM.22.1300	331.252175280357	0.691309494268104	0.192234125612584	3.59618507934082	0.0003229180901692	0.0011665256742634
LmxM.22.0790	2497.28910281027	0.977678640827771	0.120642279557466	8.10394701106479	5.32042855807427e-16	2.25981089270784e-14
LmxM.18.1390	1161.1249264199	0.652306797142738	0.153595950743442	4.24690100217755	2.16747672407846e-05	0.0001068182308995
LmxM.29.2430	1588.98617406788	0.863790352063814	0.121278496290261	7.12237023450941	1.0608662013577499e-12	2.5411446218569297e-11
LmxM.24.0870	620.537996054374	0.623489545974142	0.128654467545422	4.84623315357484	1.25827634443218e-06	8.44315722974035e-06
LmxM.10.0540	1482.53494792511	0.743731430856749	0.141209688526319	5.26685837649254	1.38778184585203e-07	1.13671196916707e-06
LmxM.20.0800	708.081111195104	0.835059777961503	0.16140765515757	5.17360702096998	2.29617503195977e-07	1.80023618109882e-06
LmxM.06.0060	706.748672840673	0.917679376694987	0.147702426364398	6.21302844701395	5.19730357592153e-10	7.27093063931977e-09
LmxM.01.0830	8.74844611478195	3.63612623253826	0.883154397729977	4.11720333600151	3.83497700933558e-05	0.0001776290644009
LmxM.12.0270	855.795840947696	1.00553914712984	0.149633139018805	6.72002975893908	1.8168745151207498e-11	3.304866667681e-10
LmxM.36.4890	116.279174342539	1.47653453934015	0.336520376748573	4.38765269909147	1.14580546203027e-05	6.07166367017972e-05
LmxM.23.0700	621.556159441384	0.830477916618411	0.139178696751701	5.9669901788203	2.41669949385875e-09	2.98107841757426e-08
LmxM.22.0910	980.423683859919	0.648756616455983	0.117035893411276	5.54322778718993	2.96946157747012e-08	2.81245556302917e-07
LmxM.03.0430	4462.37281628646	0.832540732853679	0.168627931048224	4.93714610431642	7.92740820116824e-07	5.57353614143569e-06
LmxM.08_29.1370	2176.66840596478	1.0572646782563	0.14331081474084	7.37742423813746	1.61381147513216e-13	4.50773103562339e-12
LmxM.22.1310	845.870926341688	0.632022175604943	0.173883685848121	3.63474107718756	0.0002782599540169	0.0010240562845465
LmxM.30.2420	450.345895708361	0.678898477191487	0.183137127919976	3.70704992975613	0.0002096876138864	0.0007969676837749
LmxM.21.0960	1744.80565730285	0.626938589608302	0.131312788153776	4.77439096696444	1.80251907064585e-06	1.16583651037063e-05
LmxM.36.1395	634.478592098343	0.712458202131419	0.186277781358478	3.82470843777308	0.0001309269373564	0.0005270336901889
LmxM.14.1100	750.920836094093	0.91646182125026	0.223772332210477	4.09550998640997	4.21240067784213e-05	0.000192656665338
LmxM.36.1210	885.949388240621	1.00515708026217	0.173961835203409	5.77803217060151	7.557935959764851e-09	8.2268682045525e-08
LmxM.28.1600	660.09810028929	1.48449269642345	0.136196414730149	10.8996459221392	1.15706667993122e-27	2.1668703278711903e-25
LmxM.27.2450	637.862883570654	1.0710002609379	0.161120253196963	6.64721063731602	2.98699428407577e-11	5.18357989071411e-10
LmxM.34.3910	521.237274971858	1.13049955460967	0.164602538218261	6.86805663416105	6.50823854230541e-12	1.33071676398503e-10
LmxM.09.0340	1132.26976116537	0.638038440844148	0.150299969678067	4.24510026323216	2.18495699436059e-05	0.0001074868396031
LmxM.04.0200	645.268526312579	0.959163814319634	0.188752950005437	5.08158317150543	3.74302058380178e-07	2.81153050232695e-06
LmxM.36.2690	2212.04869754874	0.70309930560787	0.152116636054217	4.62210658771912	3.79862738131213e-06	2.24377703383598e-05
LmxM.34:ncRNA:rfamscan:359749-359838	268.10494241917	1.0827147605731	0.358186090759795	3.02277165000017	0.0025047116621059	0.0070009579700653
LmxM.24.1830	411.628377595712	0.865425000279897	0.185049871237446	4.67671225325756	2.91510852071796e-06	1.77273020005284e-05
LmxM.04.0350	2886.59429951106	0.680577915526428	0.1585165129305	4.29341967561966	1.75941985262352e-05	8.84540548237817e-05
LmxM.05.0090	1837.44663729081	0.746383179893385	0.191408743651117	3.899420505334	9.64231879645753e-05	0.0004006692228079
LmxM.32:ncRNA:rfamscan:553996-554060	78.9707447801531	0.817945868869931	0.337275358046815	2.42515751404642	0.015301746038664	0.0330069076854951
LmxM.04:ncRNA:rfamscan:169141-169341	7332.80934851861	0.641716266816019	0.185764046058469	3.45446969115886	0.0005513761873975	0.0018655044110358
LmxM.27.2310	542.209792087104	0.750024313162166	0.183978760870459	4.07668966577215	4.56813957503633e-05	0.0002071627413225
LmxM.34.0240	28072.6638592	0.762895125922158	0.246437907375764	3.09568902790149	0.0019635617187489	0.0056552773724193
LmxM.30.0760	2158.42302122093	0.865903544902688	0.120147511106425	7.20700359856544	5.71964925533238e-13	1.4546268476524298e-11
LmxM.10.0185	400.292720968714	1.05219251680183	0.292343100211793	3.59917000277945	0.0003192344530443	0.00115524457316
LmxM.14.1410	553.243969542183	0.811317366798948	0.261878553067841	3.09806724259994	0.0019478722620641	0.0056140144943716
LmxM.24.2050	18330.7270641394	0.709470867629696	0.236991241805138	2.99365859356543	0.0027565420514298	0.0076118989623934
LmxM.30.2140	317.750755577573	0.755900376734805	0.32030640336818	2.35992902041963	0.0182784319883412	0.038333998366997
LmxM.36.1160	780.016054021896	0.790990575179062	0.162878009762084	4.85633742906401	1.19576867699283e-06	8.05652812626404e-06
LmxM.19.0780	1357.25127464238	0.689781165817529	0.145104950901203	4.75367078472173	1.99756213890007e-06	1.27398699880314e-05
LmxM.21.0915	47344.9545892804	1.27260320938835	0.239520223483919	5.31313469433947	1.07755328937665e-07	9.05100826143079e-07
LmxM.16.0910	1483.03394174839	1.08121083653999	0.101519163942928	10.6503126557251	1.73780402070982e-26	2.75375098666326e-24
LmxM.27.1940	1156.90898388778	0.612609715442628	0.115087142972973	5.32300741522878	1.02065582878535e-07	8.59939062289498e-07
LmxM.27.2240	597.097156824787	1.08566265050452	0.116705937984555	9.30254851855269	1.3711888985707702e-20	1.11867292319041e-18
LmxM.34.0790	1318.38536398547	0.649225632184411	0.141893222167158	4.57545203547206	4.75192831297752e-06	2.74971132717239e-05
LmxM.09.1290	1346.50641643317	0.622590119871806	0.104406077032656	5.96315978501016	2.4740627221387803e-09	3.04272788513785e-08
LmxM.27.0780	816.955179187783	0.741895895889727	0.0978319663034286	7.58336895313661	3.36695606417262e-14	1.07118602196071e-12
LmxM.06.0840	2131.83147949865	0.694033396863406	0.11657418179225	5.95357725178169	2.6234393427915503e-09	3.2168363369944e-08
LmxM.36.1200	1130.74038984893	0.728301807098634	0.126869471774951	5.74055993856854	9.43640134926733e-09	1.00072004012822e-07
LmxM.31.0670	584.932896068605	0.662557074918348	0.11261653943873	5.88330167327523	4.0216193111267e-09	4.69618736679582e-08
LmxM.22.1210	1031.14531430716	0.793238223603398	0.133306454159856	5.95048625816853	2.6734701910350504e-09	3.26361398135242e-08
LmxM.26.0180	7895.06362632919	0.835351950463	0.167951359422874	4.9737730812867	6.56621660647085e-07	4.68852901536567e-06
LmxM.15.0510	328.283771472584	0.682218069455015	0.203610381634781	3.35060552402833	0.0008063508012906	0.0026045984330203
LmxM.30.0454	306.611124244398	1.17605152097599	0.166468236545215	7.06472024563413	1.60939892958053e-12	3.69399642889793e-11
LmxM.36.2730	272.544048326902	0.645839167595138	0.264094272466465	2.4454872177402	0.0144656576174341	0.0314089641021493
LmxM.01.0160	1083.60034271482	0.624503784079177	0.206318329545568	3.02689434067586	0.0024708030712524	0.0069202642104418
LmxM.33.1590	76.678658439609	1.12842163353314	0.341633903137103	3.30301420078992	0.0009565154380368	0.0030198035285147
LmxM.36.6140	2185.72424742394	0.786201406238358	0.13562661018783	5.79680790627696	6.7589033505506e-09	7.45560423139719e-08
LmxM.13.1440	2038.42357678084	0.780698815803969	0.0939639502691628	8.30849292273932	9.692515670972531e-17	4.5122219846787406e-15
LmxM.09.1280	671.760098564304	0.621158280255255	0.119000726061465	5.21978563336176	1.79130347726908e-07	1.43364370505106e-06
LmxM.27.2410	513.165621741184	0.974272447185095	0.186164799257902	5.23338703701655	1.66431735770703e-07	1.33925537377987e-06
LmxM.09.1340	30388.2171776506	1.26822186887794	0.215075674676932	5.89663089878924	3.7099846666777304e-09	4.38636623584778e-08
LmxM.26.2570	2589.22101845643	1.33161401834485	0.135406448042038	9.83419946095505	8.02029143543752e-23	8.81162685706736e-21
LmxM.33.0070	733.690519509099	2.11479173981691	0.483485085926502	4.37405785902234	1.21958032221047e-05	6.41310903319354e-05
LmxM.24.0430	453.601711826163	0.781317802937613	0.138718773457768	5.63238690382079	1.77732397075497e-08	1.76660428456224e-07
LmxM.14.0330	1226.08720753084	0.762630964171625	0.123973890237685	6.15154499636571	7.673174933620901e-10	1.03481115307752e-08
LmxM.18.0430	331.8494694208	0.642857515065792	0.217508212833098	2.95555513372307	0.0031210690852284	0.0084237174131289
LmxM.21.0260	612.307345082405	0.841285475882023	0.13163205683471	6.39118992828944	1.6459977892341002e-10	2.5351442585586903e-09
LmxM.28.2350	1025.24150533746	0.778033468475599	0.131963999129281	5.89580092759527	3.7286829201275e-09	4.39312323792111e-08
LmxM.06.0800	1779.96510574218	0.847277494150478	0.124214409770425	6.82108859766293	9.03531939276695e-12	1.7684330592969002e-10
LmxM.12.0990	527.47671713099	1.02989945184955	0.112350244333472	9.16686437096345	4.8697790618050806e-20	3.8583634105071e-18
LmxM.30.0320	52.6954403584385	1.06465002569996	0.46878869857436	2.27106589586669	0.0231429891538146	0.0469815793612791
LmxM.08_29.1330	922.28079769703	0.607807817026209	0.108258878316285	5.61439233880165	1.97254196571942e-08	1.94190511320526e-07
LmxM.08.1080	72.0399595368999	0.841175448252101	0.347349854820229	2.42169511971569	0.0154483051967786	0.0332564032706687
LmxM.08_29.2840	514.16954561021	0.723952609903362	0.191164086059025	3.7870743654215	0.0001524314900523	0.0006029935084165
LmxM.08.0760	128.574056759834	1.23228484437298	0.278114541849533	4.43085369135311	9.38607590849924e-06	5.06491587989743e-05
LmxM.08.0770	189.505463734792	1.22390157775735	0.217058599447086	5.63857677546525	1.71461371122806e-08	1.71791828701888e-07
LmxM.14.0300	665.038078831173	0.65286834279981	0.156702778719686	4.16628440244622	3.09604417915983e-05	0.0001463649112809
LmxM.25.0690	2979.76563306997	0.895134761088203	0.112176724586137	7.97968352517597	1.4670895903447401e-15	5.86835836137894e-14
LmxM.31.2240	1106.08923408719	0.795029314614113	0.103743713847176	7.66339747375213	1.81077831682495e-14	5.85129934534807e-13
LmxM.08.0740	196.807152747143	0.730366081624422	0.231972887539986	3.14849760836179	0.0016411206623305	0.0048158241658132
LmxM.33.1810	40.5385503115154	1.24269698394274	0.365847459461185	3.39676264466334	0.0006818808498492	0.0022519832475983
LmxM.24.0555	291.212549783335	0.617377267170323	0.187193368183581	3.29807232575066	0.0009735105521787	0.0030675820076302
LmxM.14.0470	91.4580033643649	2.13068201550346	0.338752031416417	6.28979848945697	3.17878332491534e-10	4.681107767666111e-09
LmxM.34.3670	724.631275583471	1.0786926093852	0.124483927694817	8.66531631320076	4.50261114708627e-18	2.68851564144862e-16
LmxM.23.0540	667.808155805611	0.651617797528312	0.141933967741822	4.59099261364697	4.41142950526342e-06	2.57437529202341e-05
LmxM.36.2560	822.876439531965	0.629395660558708	0.129365751626108	4.86524178654164	1.14316968731212e-06	7.73337499892228e-06
[truncated: 337 more rows]

## Sheet: T7-vs-DAC5_down
Supplementary Table 4. List of DE genes in DACs mutants compared to parental cells.
T7-vs-DAC5_down
[truncated: 1,936 more rows]

## Sheet: T7-vs-DAC5_up
Supplementary Table 4. List of DE genes in DACs mutants compared to parental cells.
[truncated: 383 more rows]
