# Supplementary material for: AcetyLeish: acetylation-driven control of stage differentiation and virulence in Leishmania mexicana
Source: Research Square preprint supplement (doi:10.21203/rs.3.rs-7520632/v1), 2025-09-17
Supplement: Supplementary file 8 [file f135f42cc00caf52f17acd27.docx]

**Supplementary Information**

**AcetyLeish: acetylation-driven control of stage differentiation and virulence in *Leishmania mexicana***

**Supplementary Data**

**
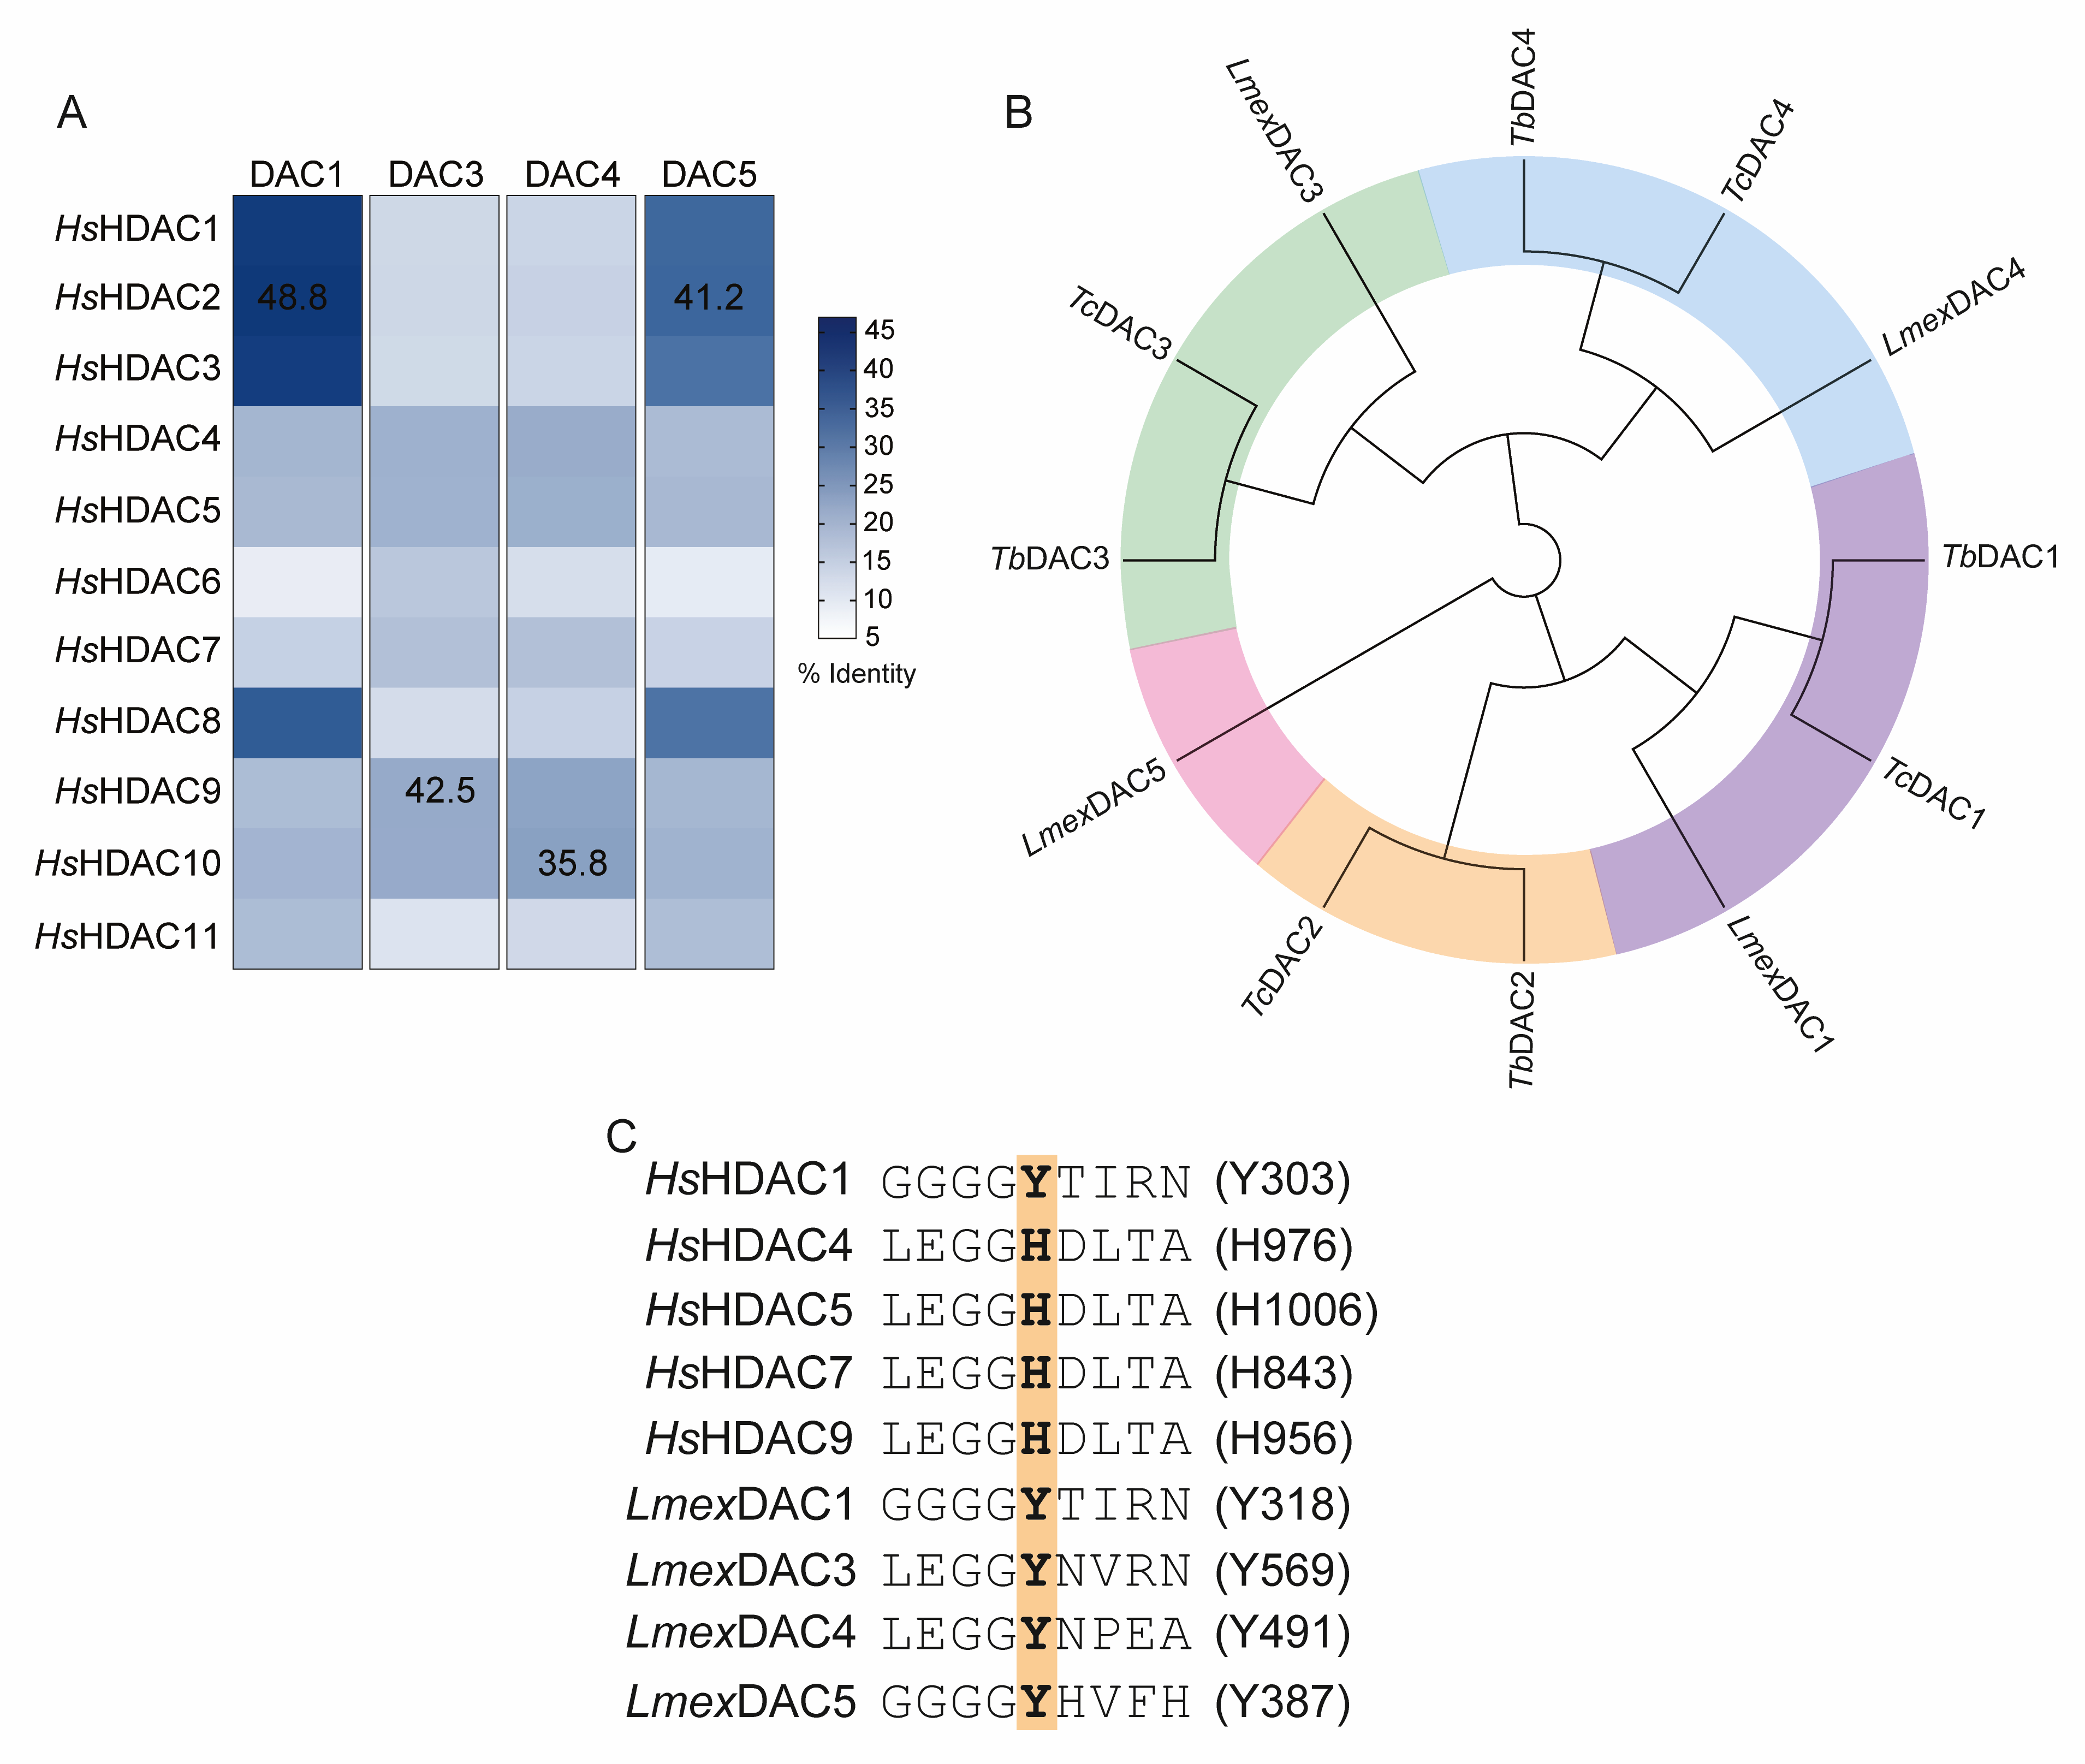
**

**Supplementary Data 1. Comparative analysis of *L. mexicana* DACs. A.** Pairwise amino acid sequence identity matrix of human HDAC domains compared to *L. mexicana* HDAC domains. **B.** Phylogenetic tree of *L. mexicana*, *T. brucei*, and *T. cruzi* DACs. *L. mexicana* DAC5 exhibits greater divergence compared to other trypanosomatid enzymes. **C.** All *L. mexicana* DACs retain the tyrosine residue essential for lysine deacetylase activity, characteristic of human HDAC class I.

**
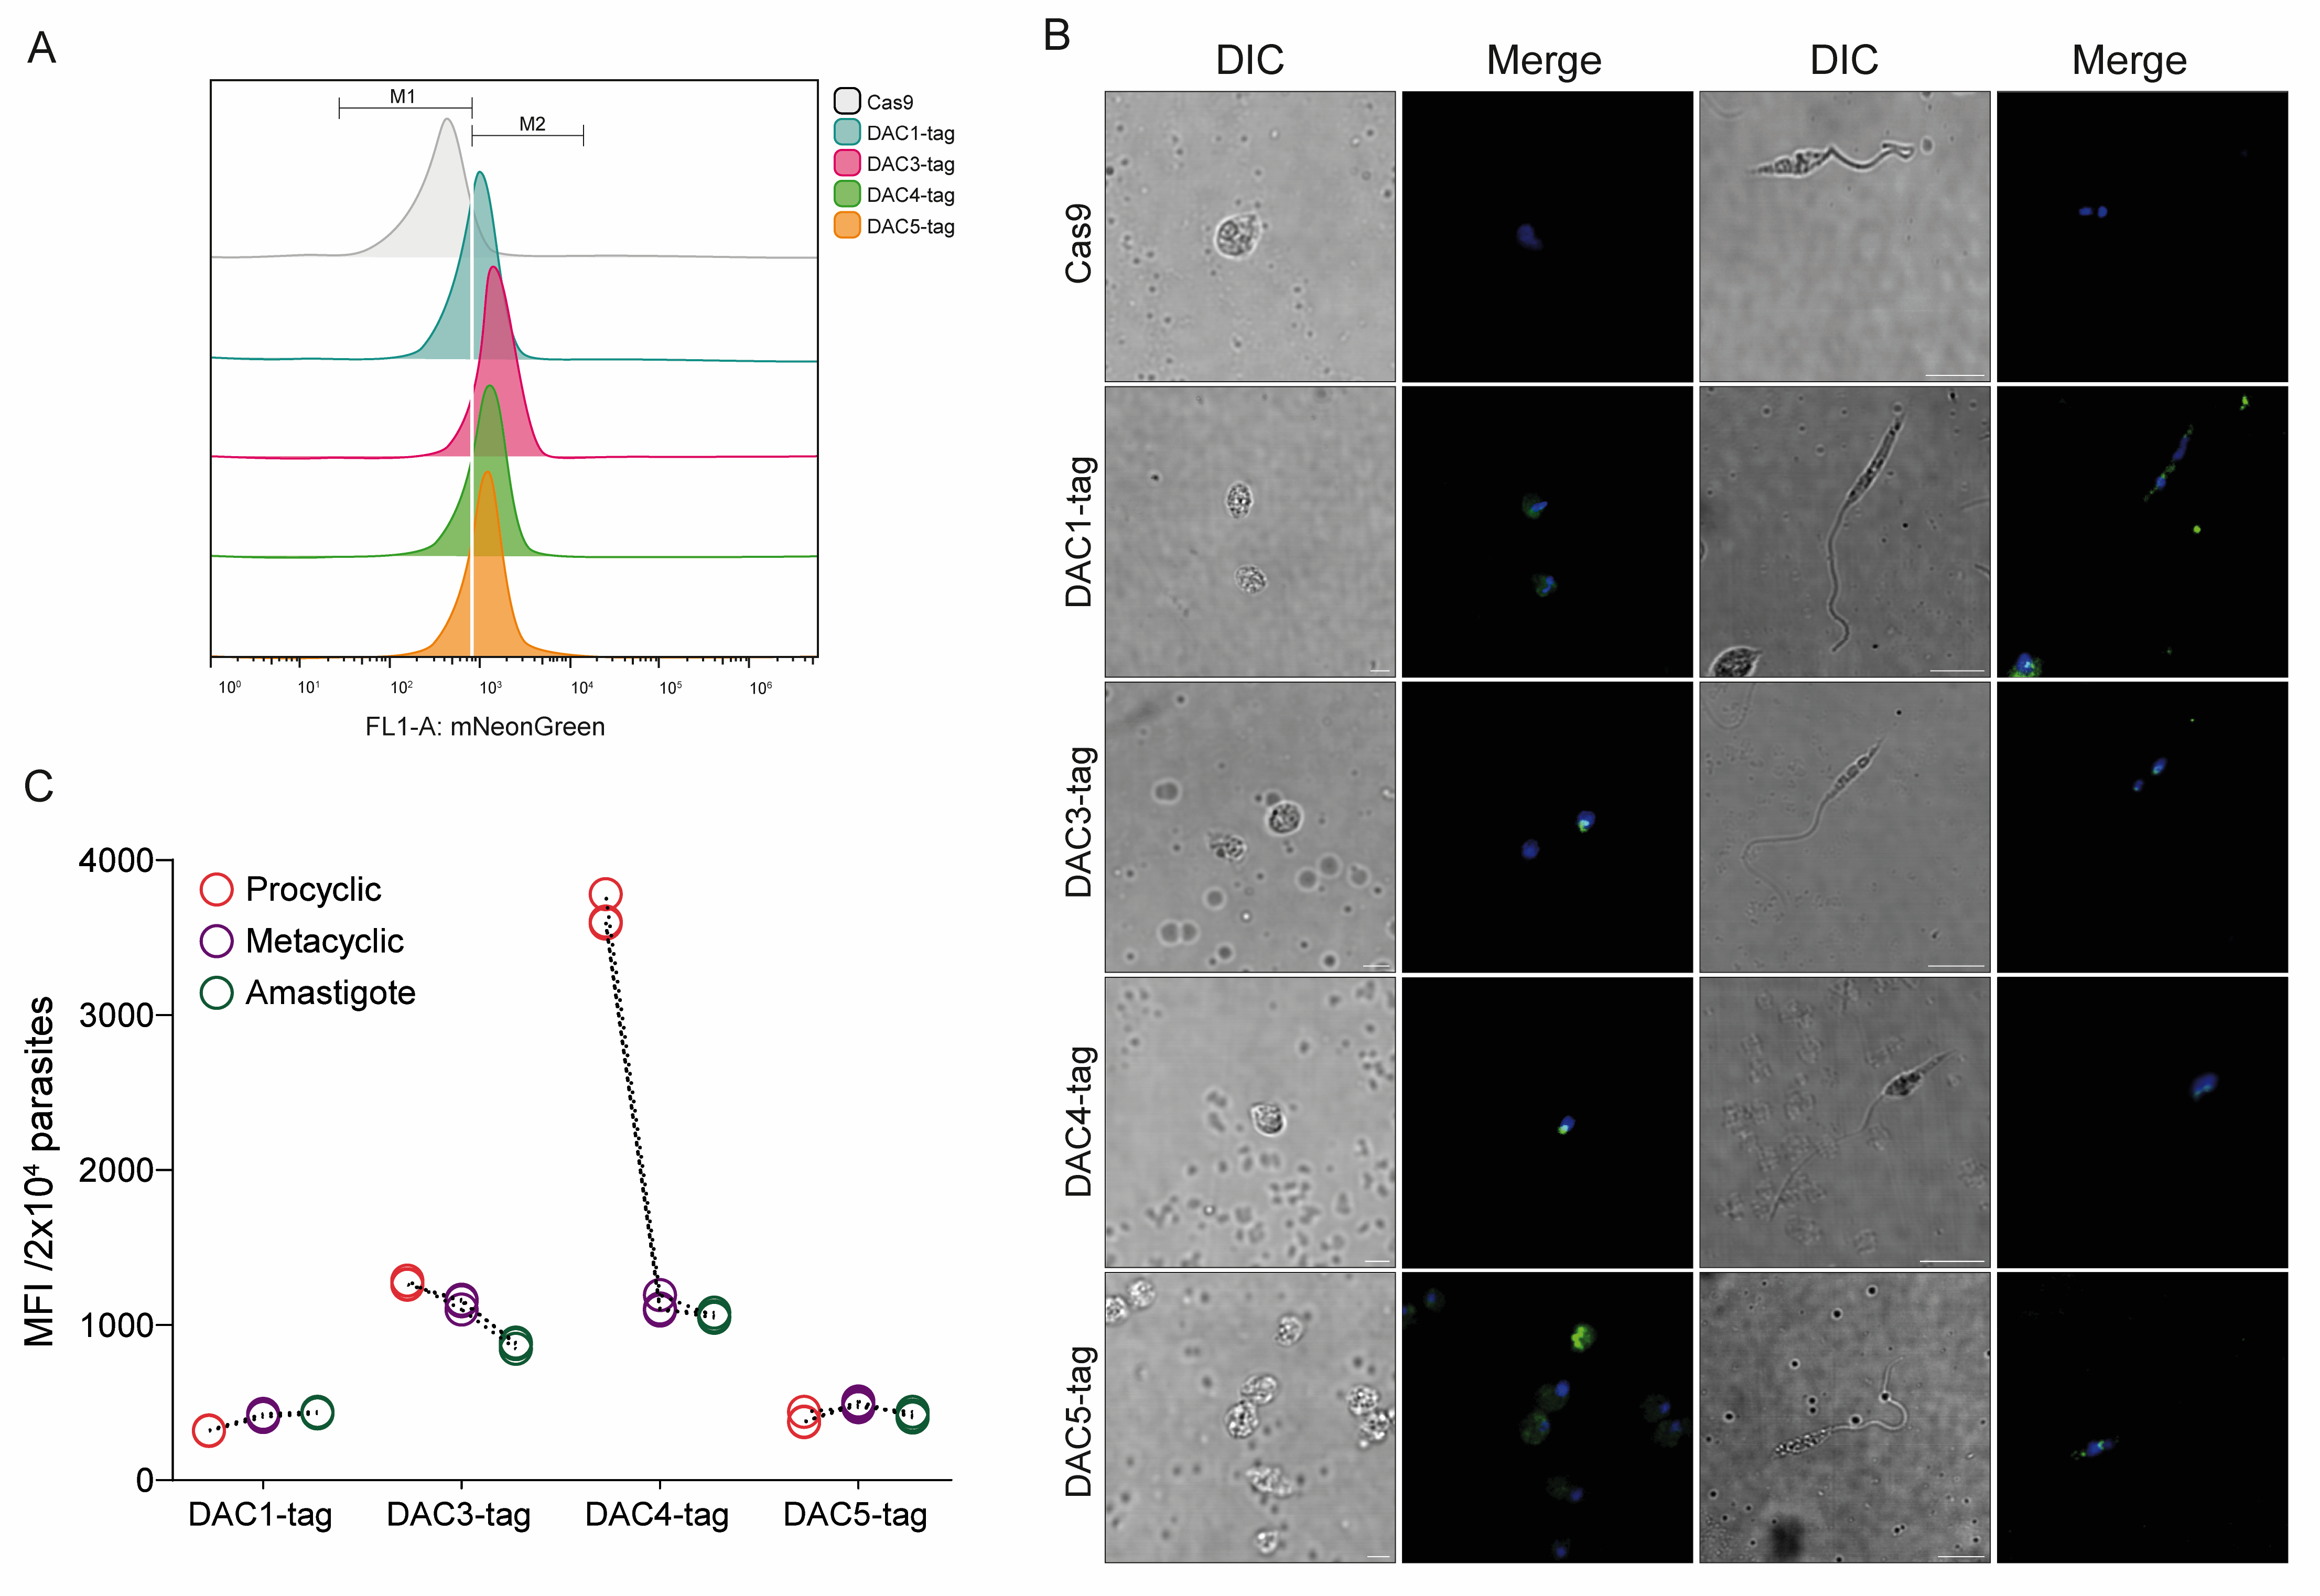
**

**Supplementary Data 2. *L. mexicana* DACs parasite stage subcellular localization and expression.** **A.** Representative flow cytometry histograms showing fluorescence intensity of *L. mexicana* procyclic parasites expressing DACs fused to mNeonGreen generated in this study. **B.** Confocal microscopy images of metacyclic and axenic amastigote stages of DAC-tagged parasites. As observed in procyclic forms, DAC1 and DAC5 are cytoplasmic, while DAC3 and 4 are nuclear. Scale bars: 5 µm (metacyclic), 2 µm (axenic amastigote). **C.** DAC protein expression in procyclic, metacyclic, and axenic amastigote stages of *L. mexicana* as determined by flow cytometry analysis. The data shown are representative of three independent quantifications.


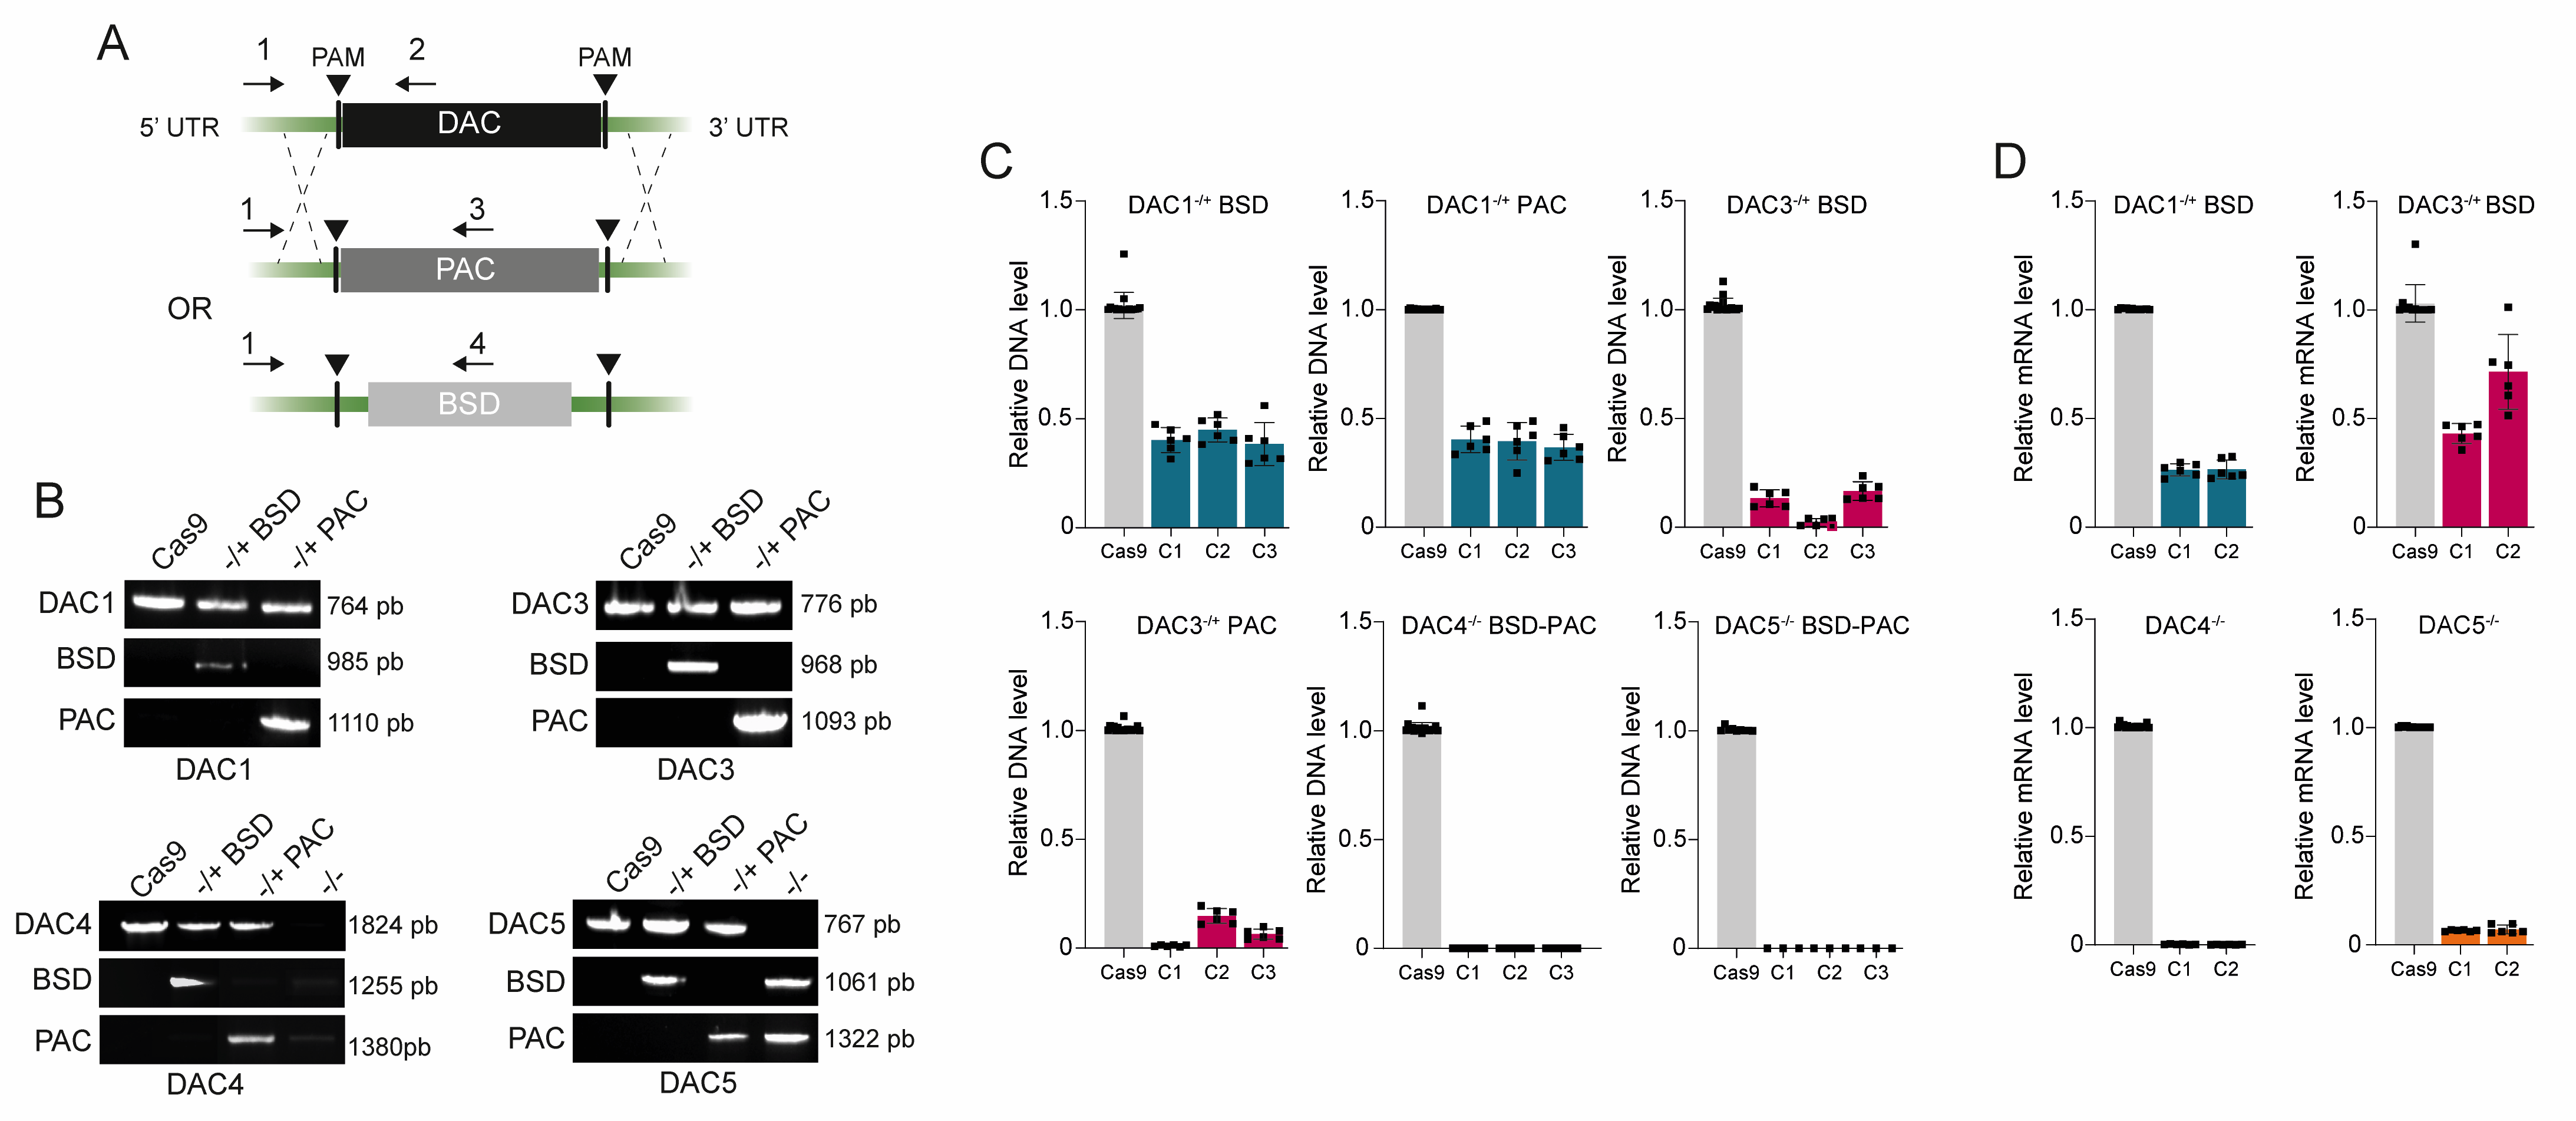


**Supplementary Data 3. Confirmation of *L. mexicana* DACs knockout mutants**. **A.** Schematic representation of gene editing by homologous recombination. DAC loci showing integration of homologous recombination cassettes (HR) containing the antibiotic resistance genes for puromycin (PAC) and blasticidin (BSD). **B.** Diagnostic PCR for DAC1 (LmxM.21.0680), DAC3 (LmxM.21.1870), DAC4 (LmxM.08.1090), and DAC5 (LmxM.24.1370). DAC knockout mutant parasites were genotyped by PCR using oligonucleotides pairs flanking the specific loci of each DAC (primer 1 in letter A) and antibiotic resistance genes (primer 3 or 4 in letter A). **C-D**. Confirmation of knockout mutant parasites by qPCR and RT-qPCR to measure DAC gene copy number and mRNA expression levels, respectively. We obtained hemizygous knockout mutants (one disrupted allele) for DAC1 and DAC3, and homozygous knockout mutants (both alleles disrupted) for DAC4 and DAC5. All data shown are representative of three independent biological replicates of a triplicate technical experiment. C1, C2 and C3: independent clones.


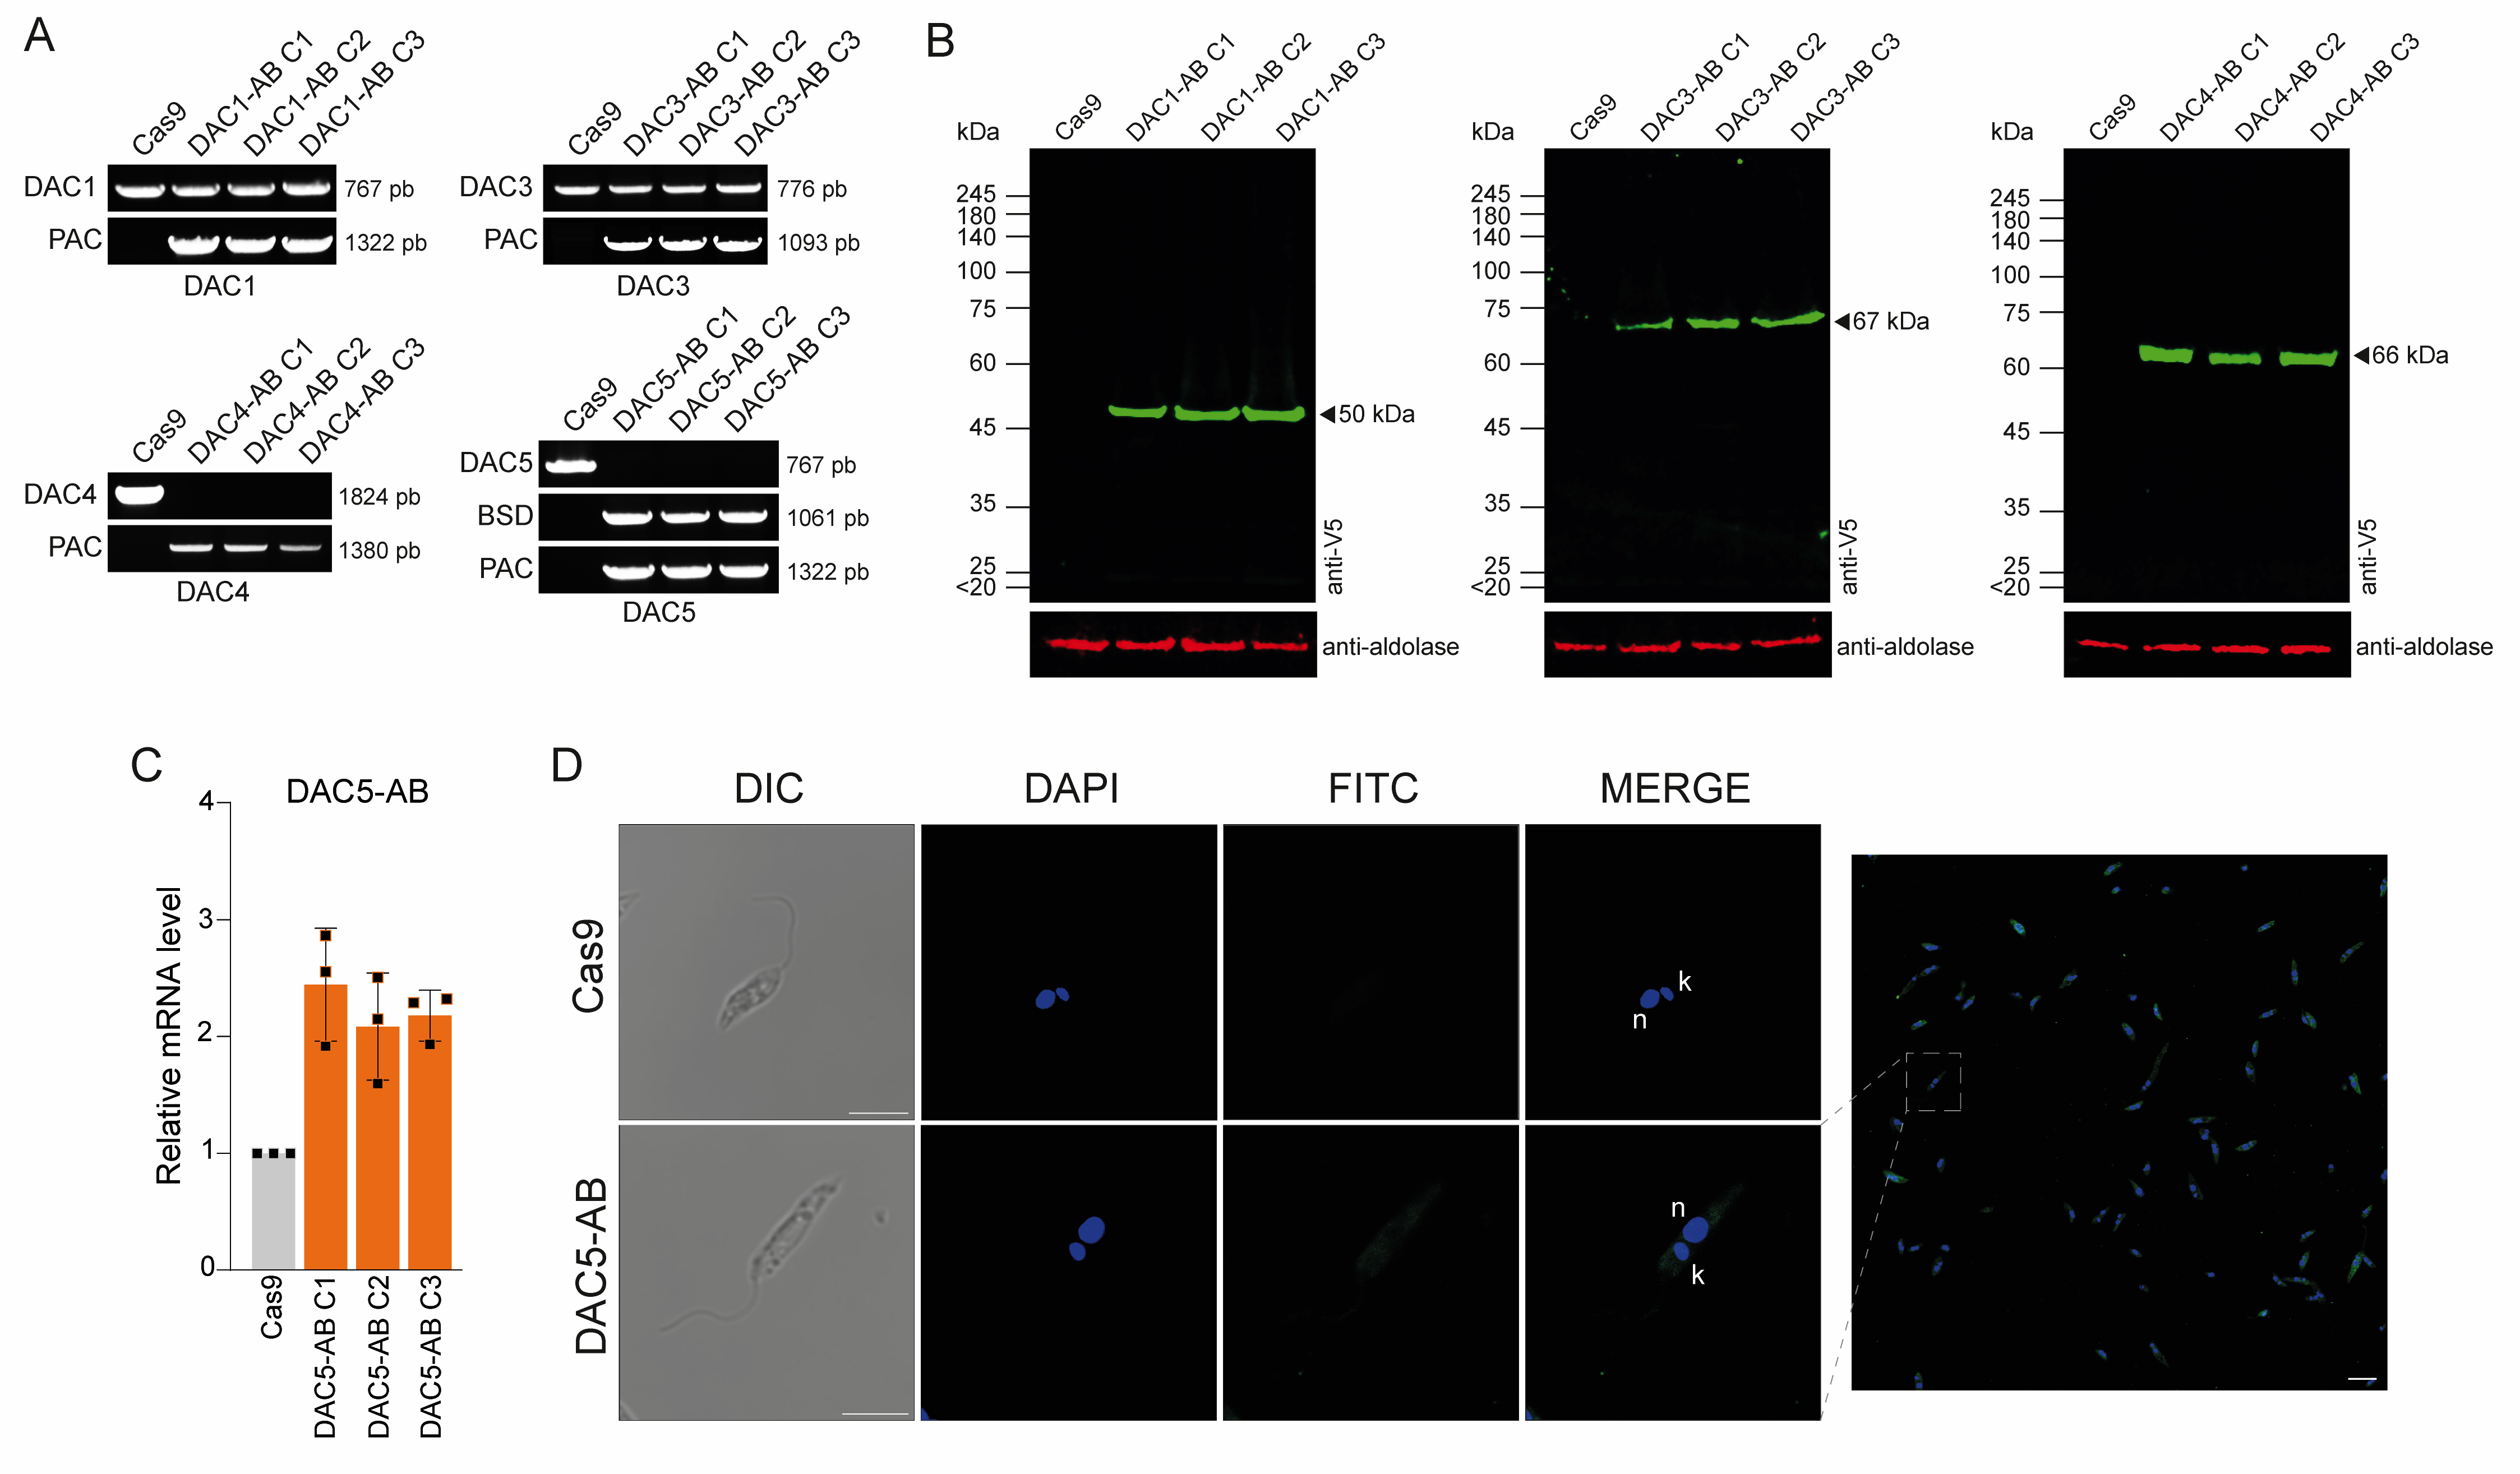


**Supplementary Data 4. Generation of *L. mexicana* DAC add-back parasites. A.** Confirmation of the maintenance of knockout genotype in each DAC add-back parasite (AB). Diagnostic PCR reactions were done as described in Supplementary Data 4A-B. **B.** Western blot analysis of total protein extracts from DAC1, DAC3, and DAC4 add-back parasites using an anti-V5 antibody. Arrowheads indicate the expected sizes of DAC1 (50 kDa), DAC3 (67 kDa), and DAC4 (66 kDa). Aldolase was used as a loading control and Cas9 cell line as negative control. **C.** DAC5-AB was evaluated by RT-qPCR and the expression levels were compared to the parental DAC5 gene expression. *L. mexicana* GAPDH gene (LmxM.29.2980) was used as endogenous control. Statistical significance was determined by one-way ANOVA. **p* < 0.05, ***p* < 0.01, ****p* < 0.001, *****p* < 0.0001. **D.** Immunofluorescence of procyclic DAC5 add-back parasites using an anti-V5 antibody. DNA/kinetoplast stained with DAPI. Scale bar: 5 µm.


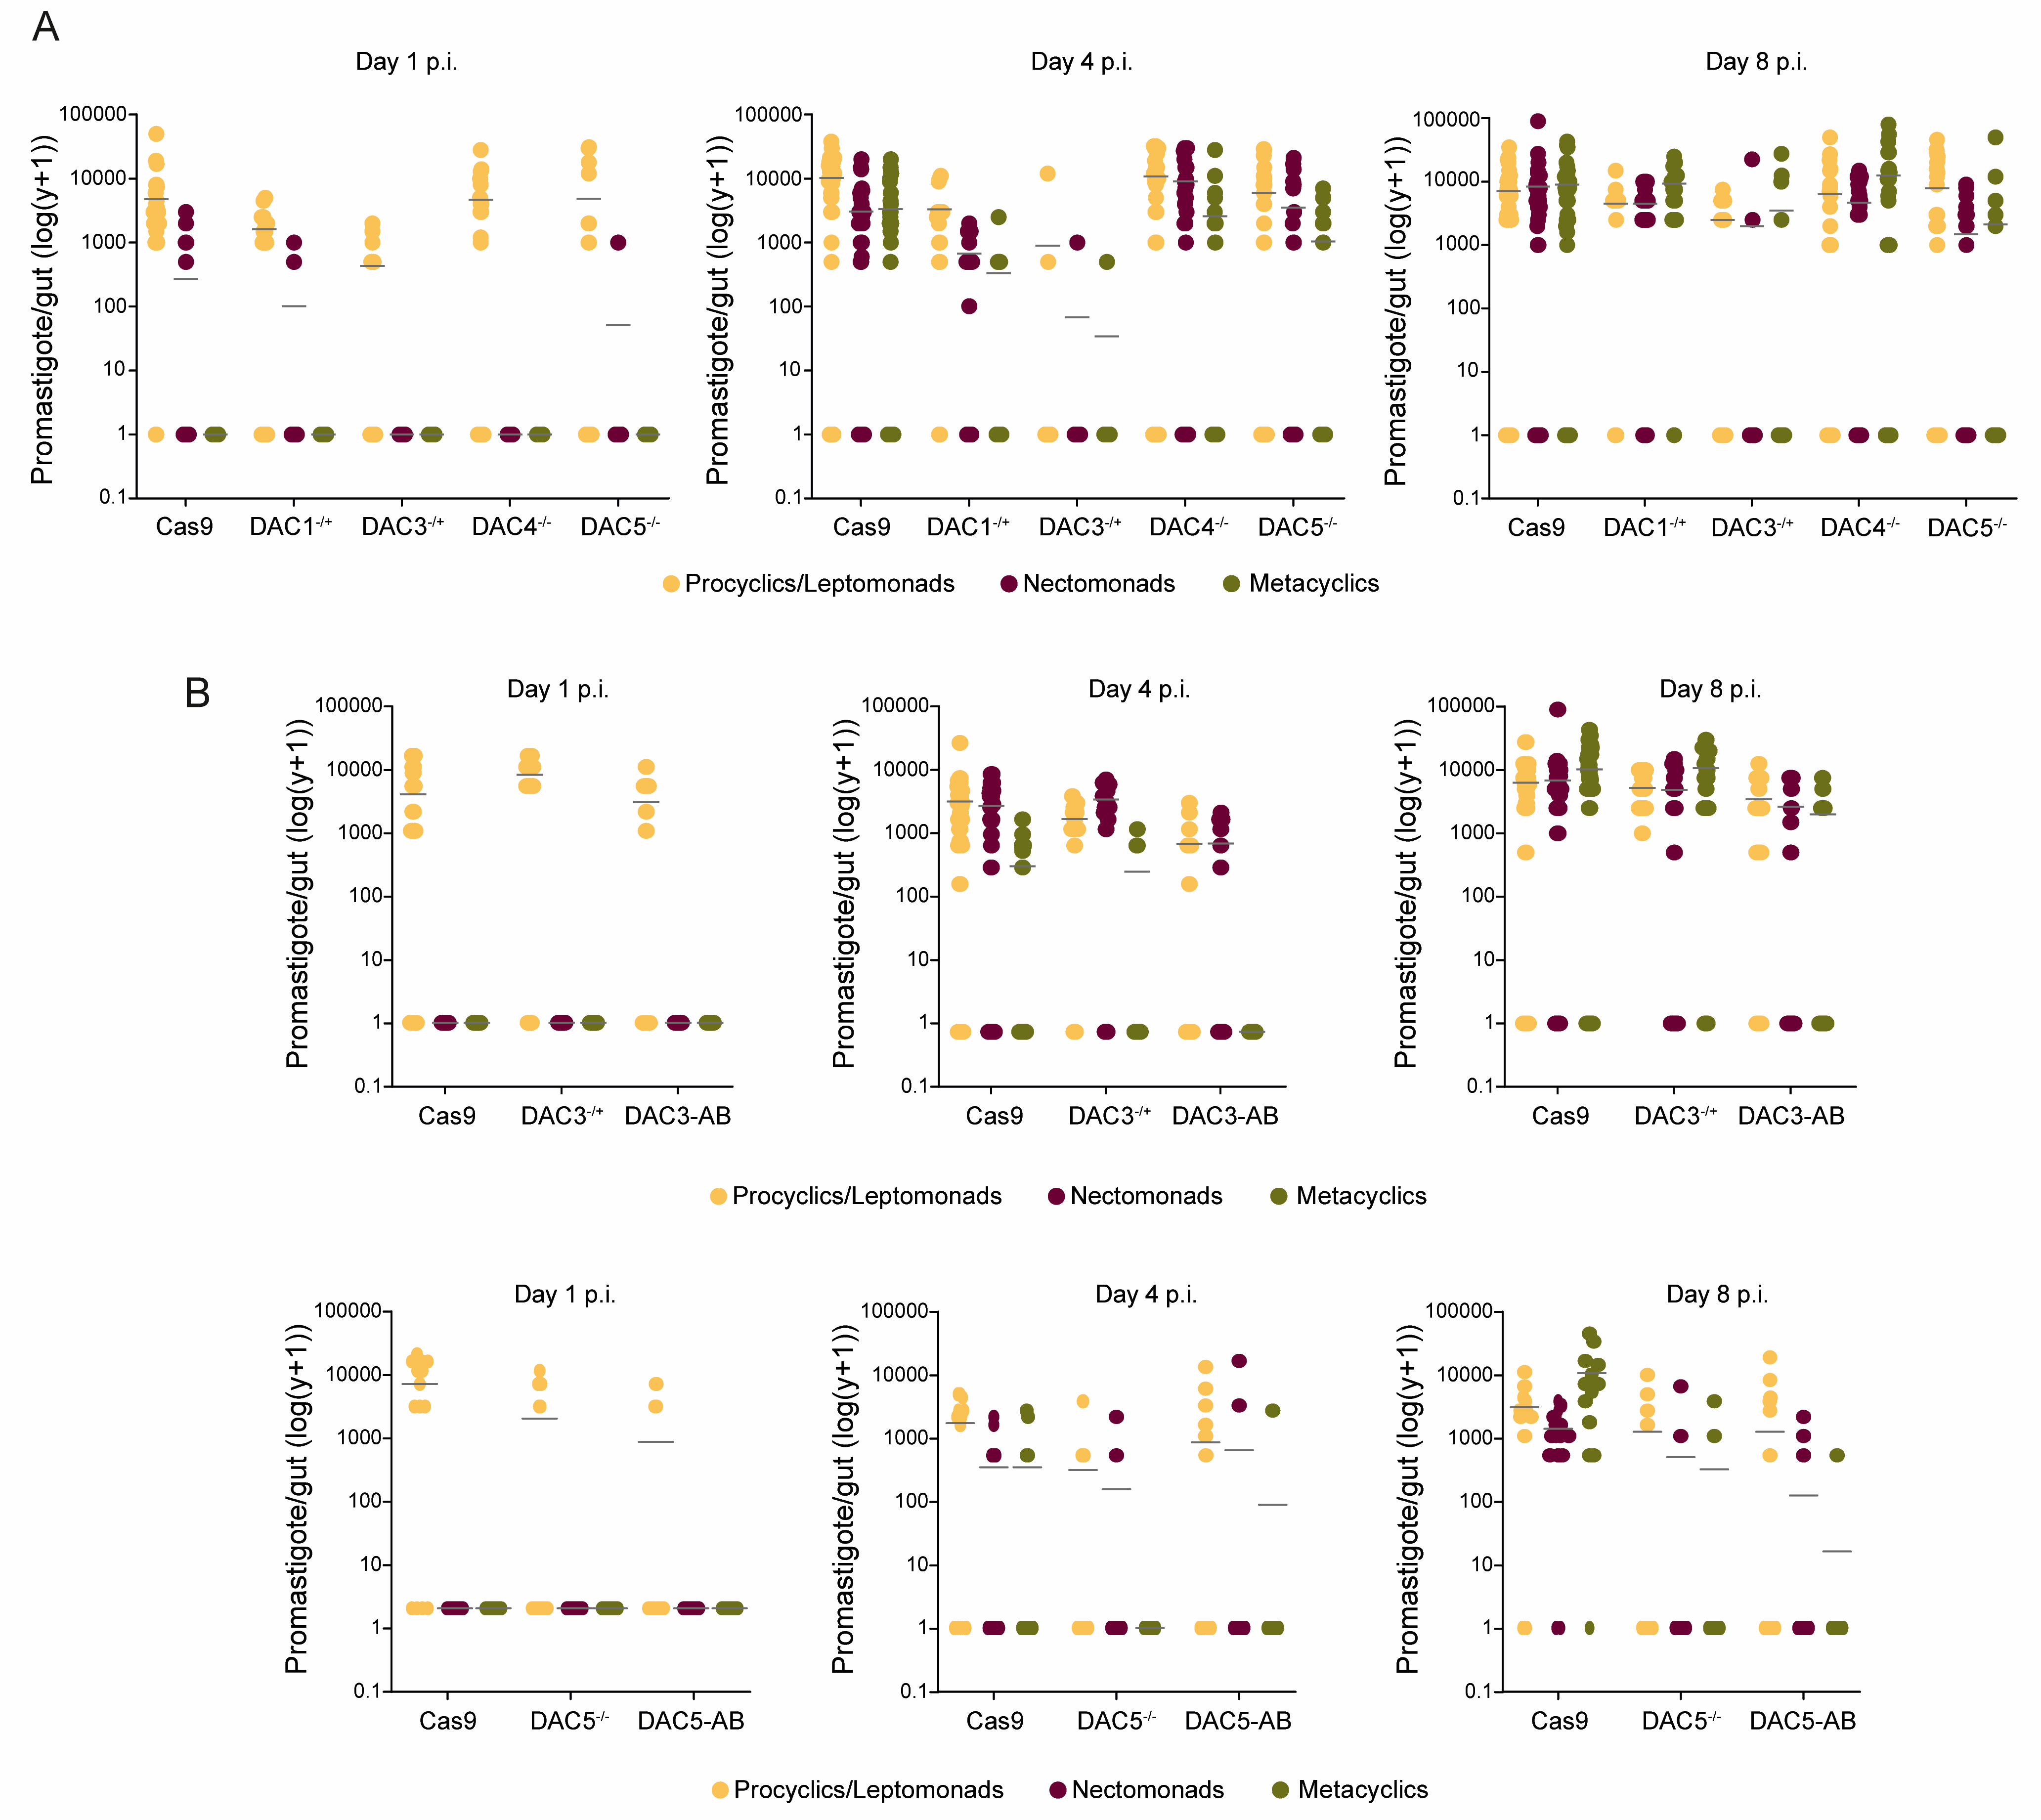


**Supplementary Figure 5. DAC3 and DAC5 impact *L. longipalpis* *in vivo* metacyclogenesis.** **A.** *L. longipalpis* females were infected with stationary procyclic parasites from parental, knockout (DAC1-/+, DAC3-/+, DAC4-/-, and DAC5-/-). **B**. Metacyclogenesis was monitored at 1-, 4-, and 8-days post-infection for DAC3-AB (upper panel) and DAC5-AB (lower panel), but no phenotype reversion was observed when compared to DAC3-/+ and DAC5-/- parasites. Each experiment was performed at least three times with ~100 *L. longipalpis* females per cell line.


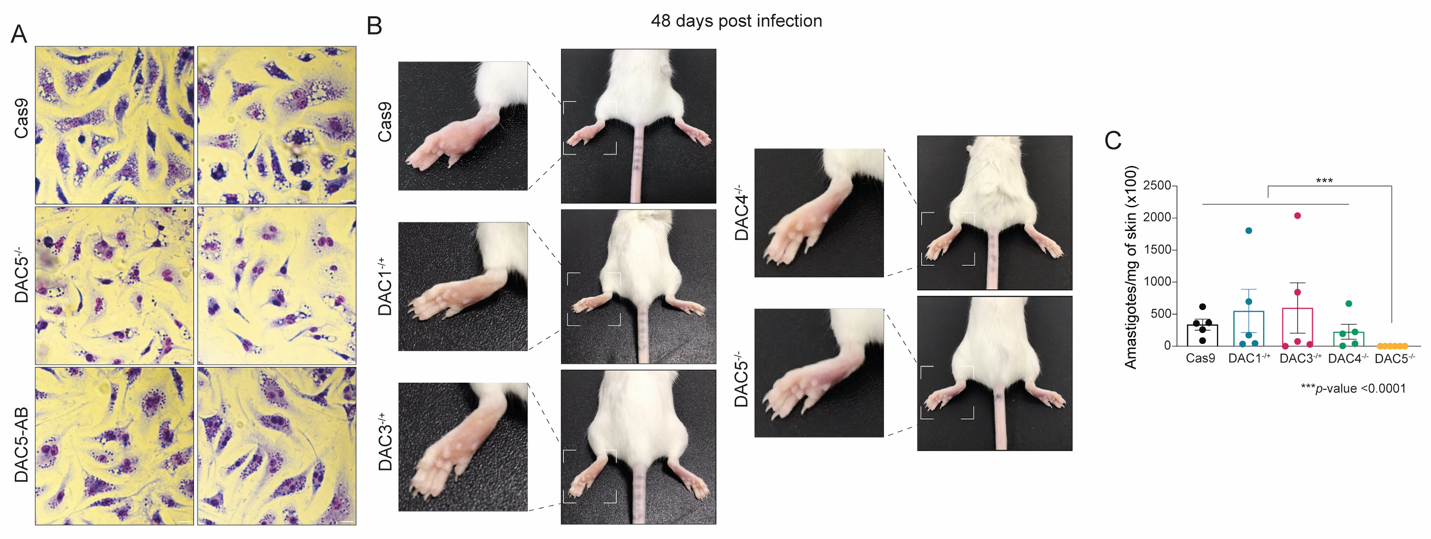


**Supplementary Data 6. Loss of DAC5 impairs *L. mexicana* infectivity. A**. *In vitro* infection assay of DAC5-AB parasites. BMDMs were infected with axenic amastigotes of Cas9, DAC5-/-, and DAC5-AB parasites at a multiplicity of infection (MOI) of 1:1 for 2h. Extracellular parasites were removed by washing. After 48h of infection, cells were fixed with methanol, stained with Giemsa, and visualized by microscopy. The number of intracellular amastigotes per macrophage was quantified using ImageJ software (n=200 macrophages per condition). Scale bar: 50 μm. Data represent the mean ± SD of three independent experiments. **B.** Representative images of infected BALB/c mice with Cas9 and DACs mutant parasites at 48 days post-infection demonstrating reduced lesion development in mice infected with DAC5-/- compared to the Cas9 parasites. **C.** Parasite burden of tissues of BALB/c mice infected with parental and DACs knockout mutants. qPCR was performed to determine parasite burden in skin samples collected 48 days post-initial infection. We measured kDNA for parasite burden determination.

**
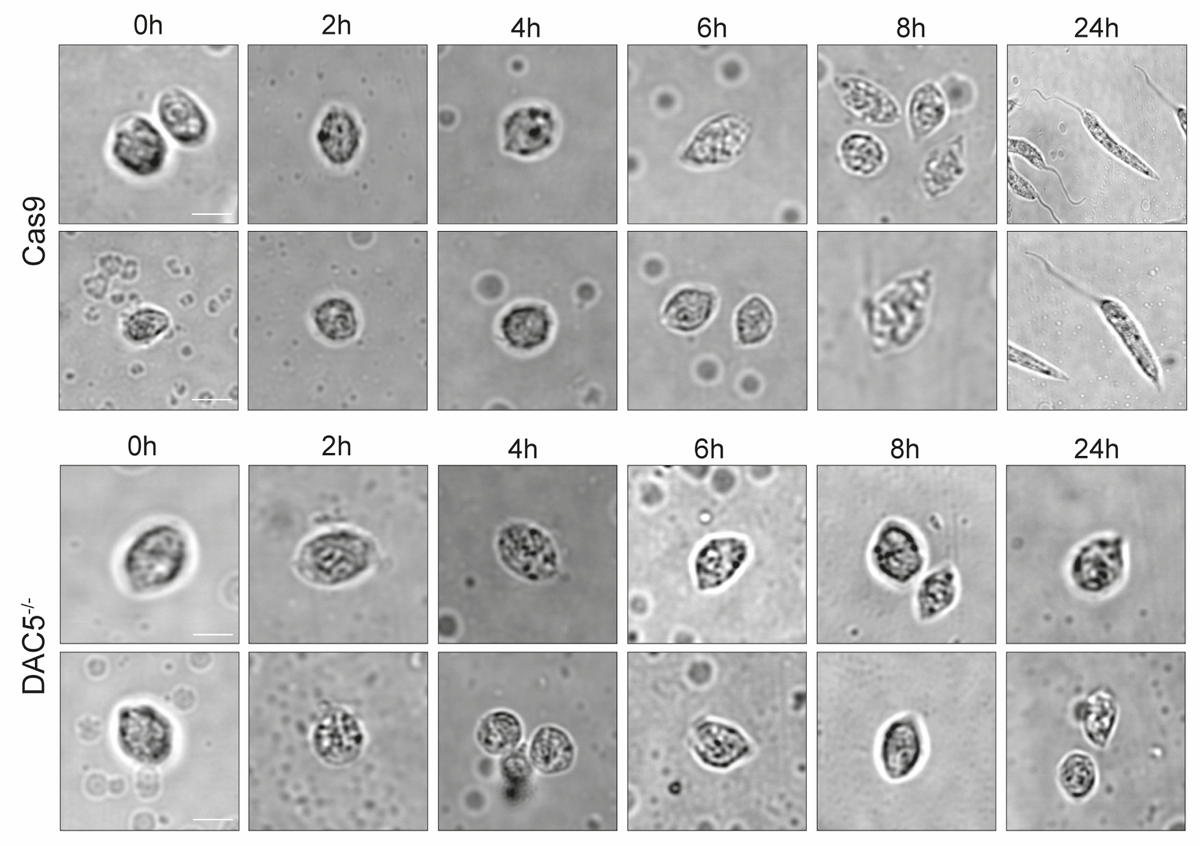
**

**Supplementary Figure 7. DAC5 influences axenic amastigote to procyclic differentiation.** Differentiation kinetics of DAC5-/- and Cas9 parasites were assessed over 24h (0, 2, 4, 6, 8, and 24h). DAC5-/- cells exhibit a delay in differentiation to procyclic forms. Scale bar: 2 µm (axenic amastigotes), 5 µm (procyclic forms).

**
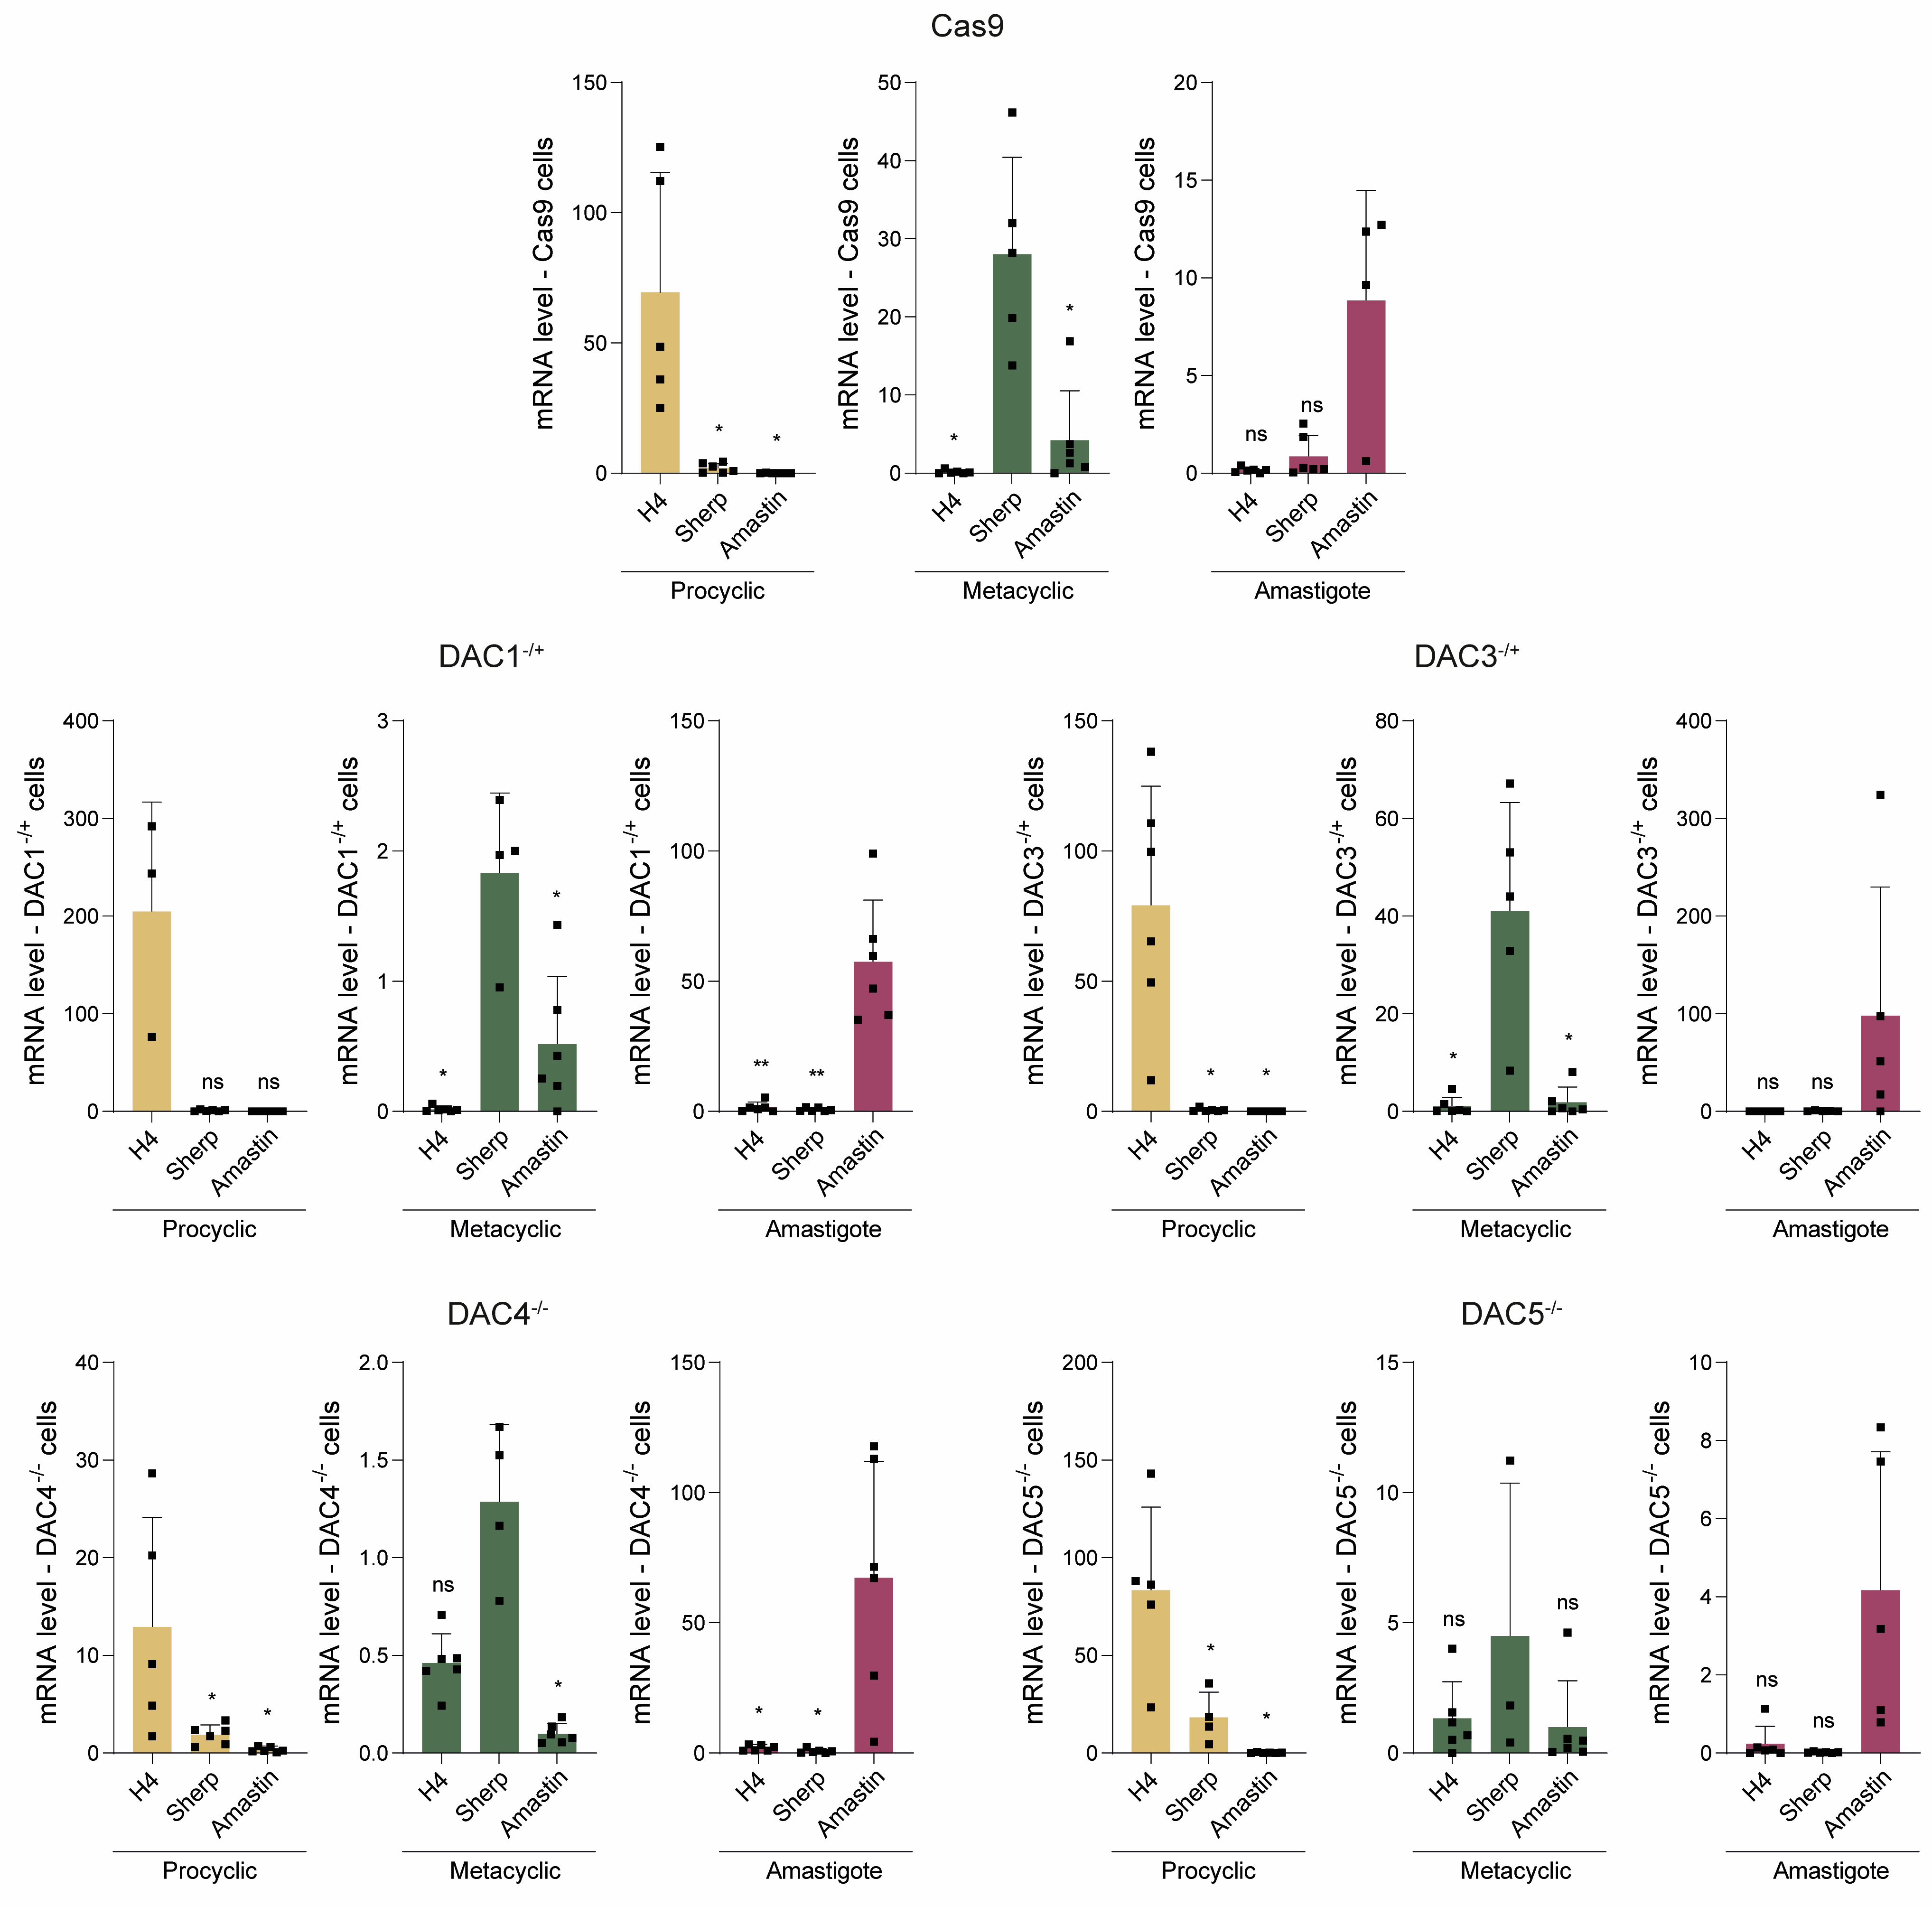
**

**Supplementary Data 8. Measurement of procyclic, metacyclic and amastigote expression markers in DACs mutant.** Using RT-qPCR we measure the expression of Histone H4 (procyclic), sherp (metacyclic) and amastin (amastigote) expression in the parental and DACs mutant. The analysis confirmed each parasite stage we were working and did not reveal significant differences between the cell lines. Data shown are representative of three independent experiments (n=6 technical replicates for each sample).


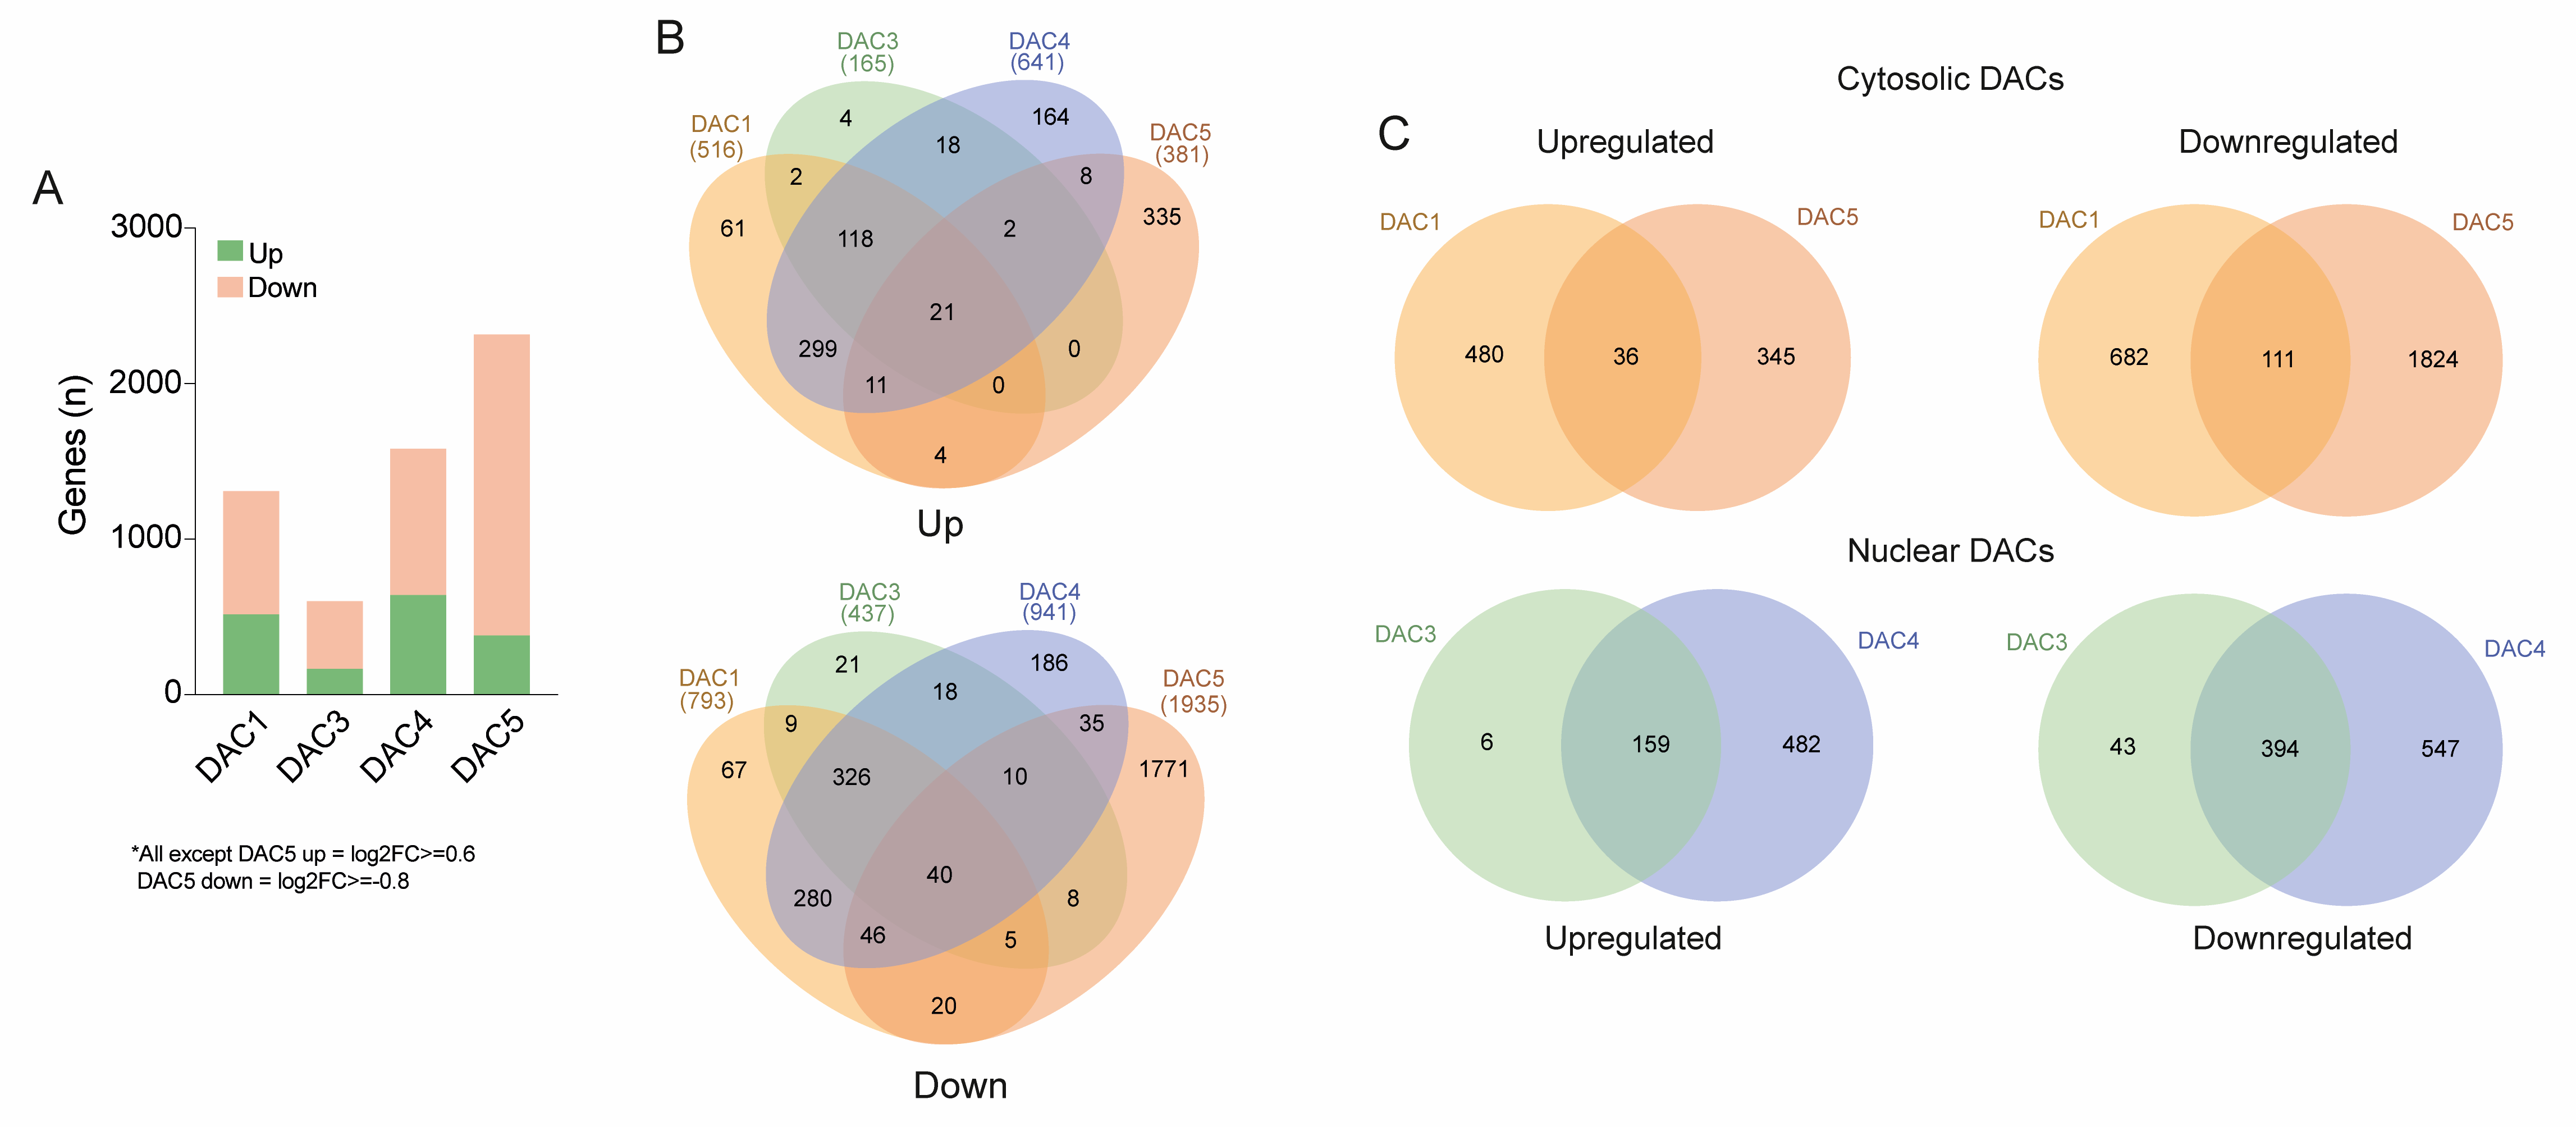


**Supplementary Data 9. Differential gene expression in *L. mexicana* DAC knockout mutants. A.** Number of upregulated and downregulated genes in each DAC knockout mutant compared to the parental strain. **B.** Venn diagrams showing the overlap of upregulated (upper panel) and downregulated (lower panel) genes among all DAC knockout mutants. **C.** Venn diagrams showing the overlap of upregulated and downregulated genes between cytosolic DAC (DAC1 and DAC5) and nuclear DAC mutants (DAC3 and DAC4).

**
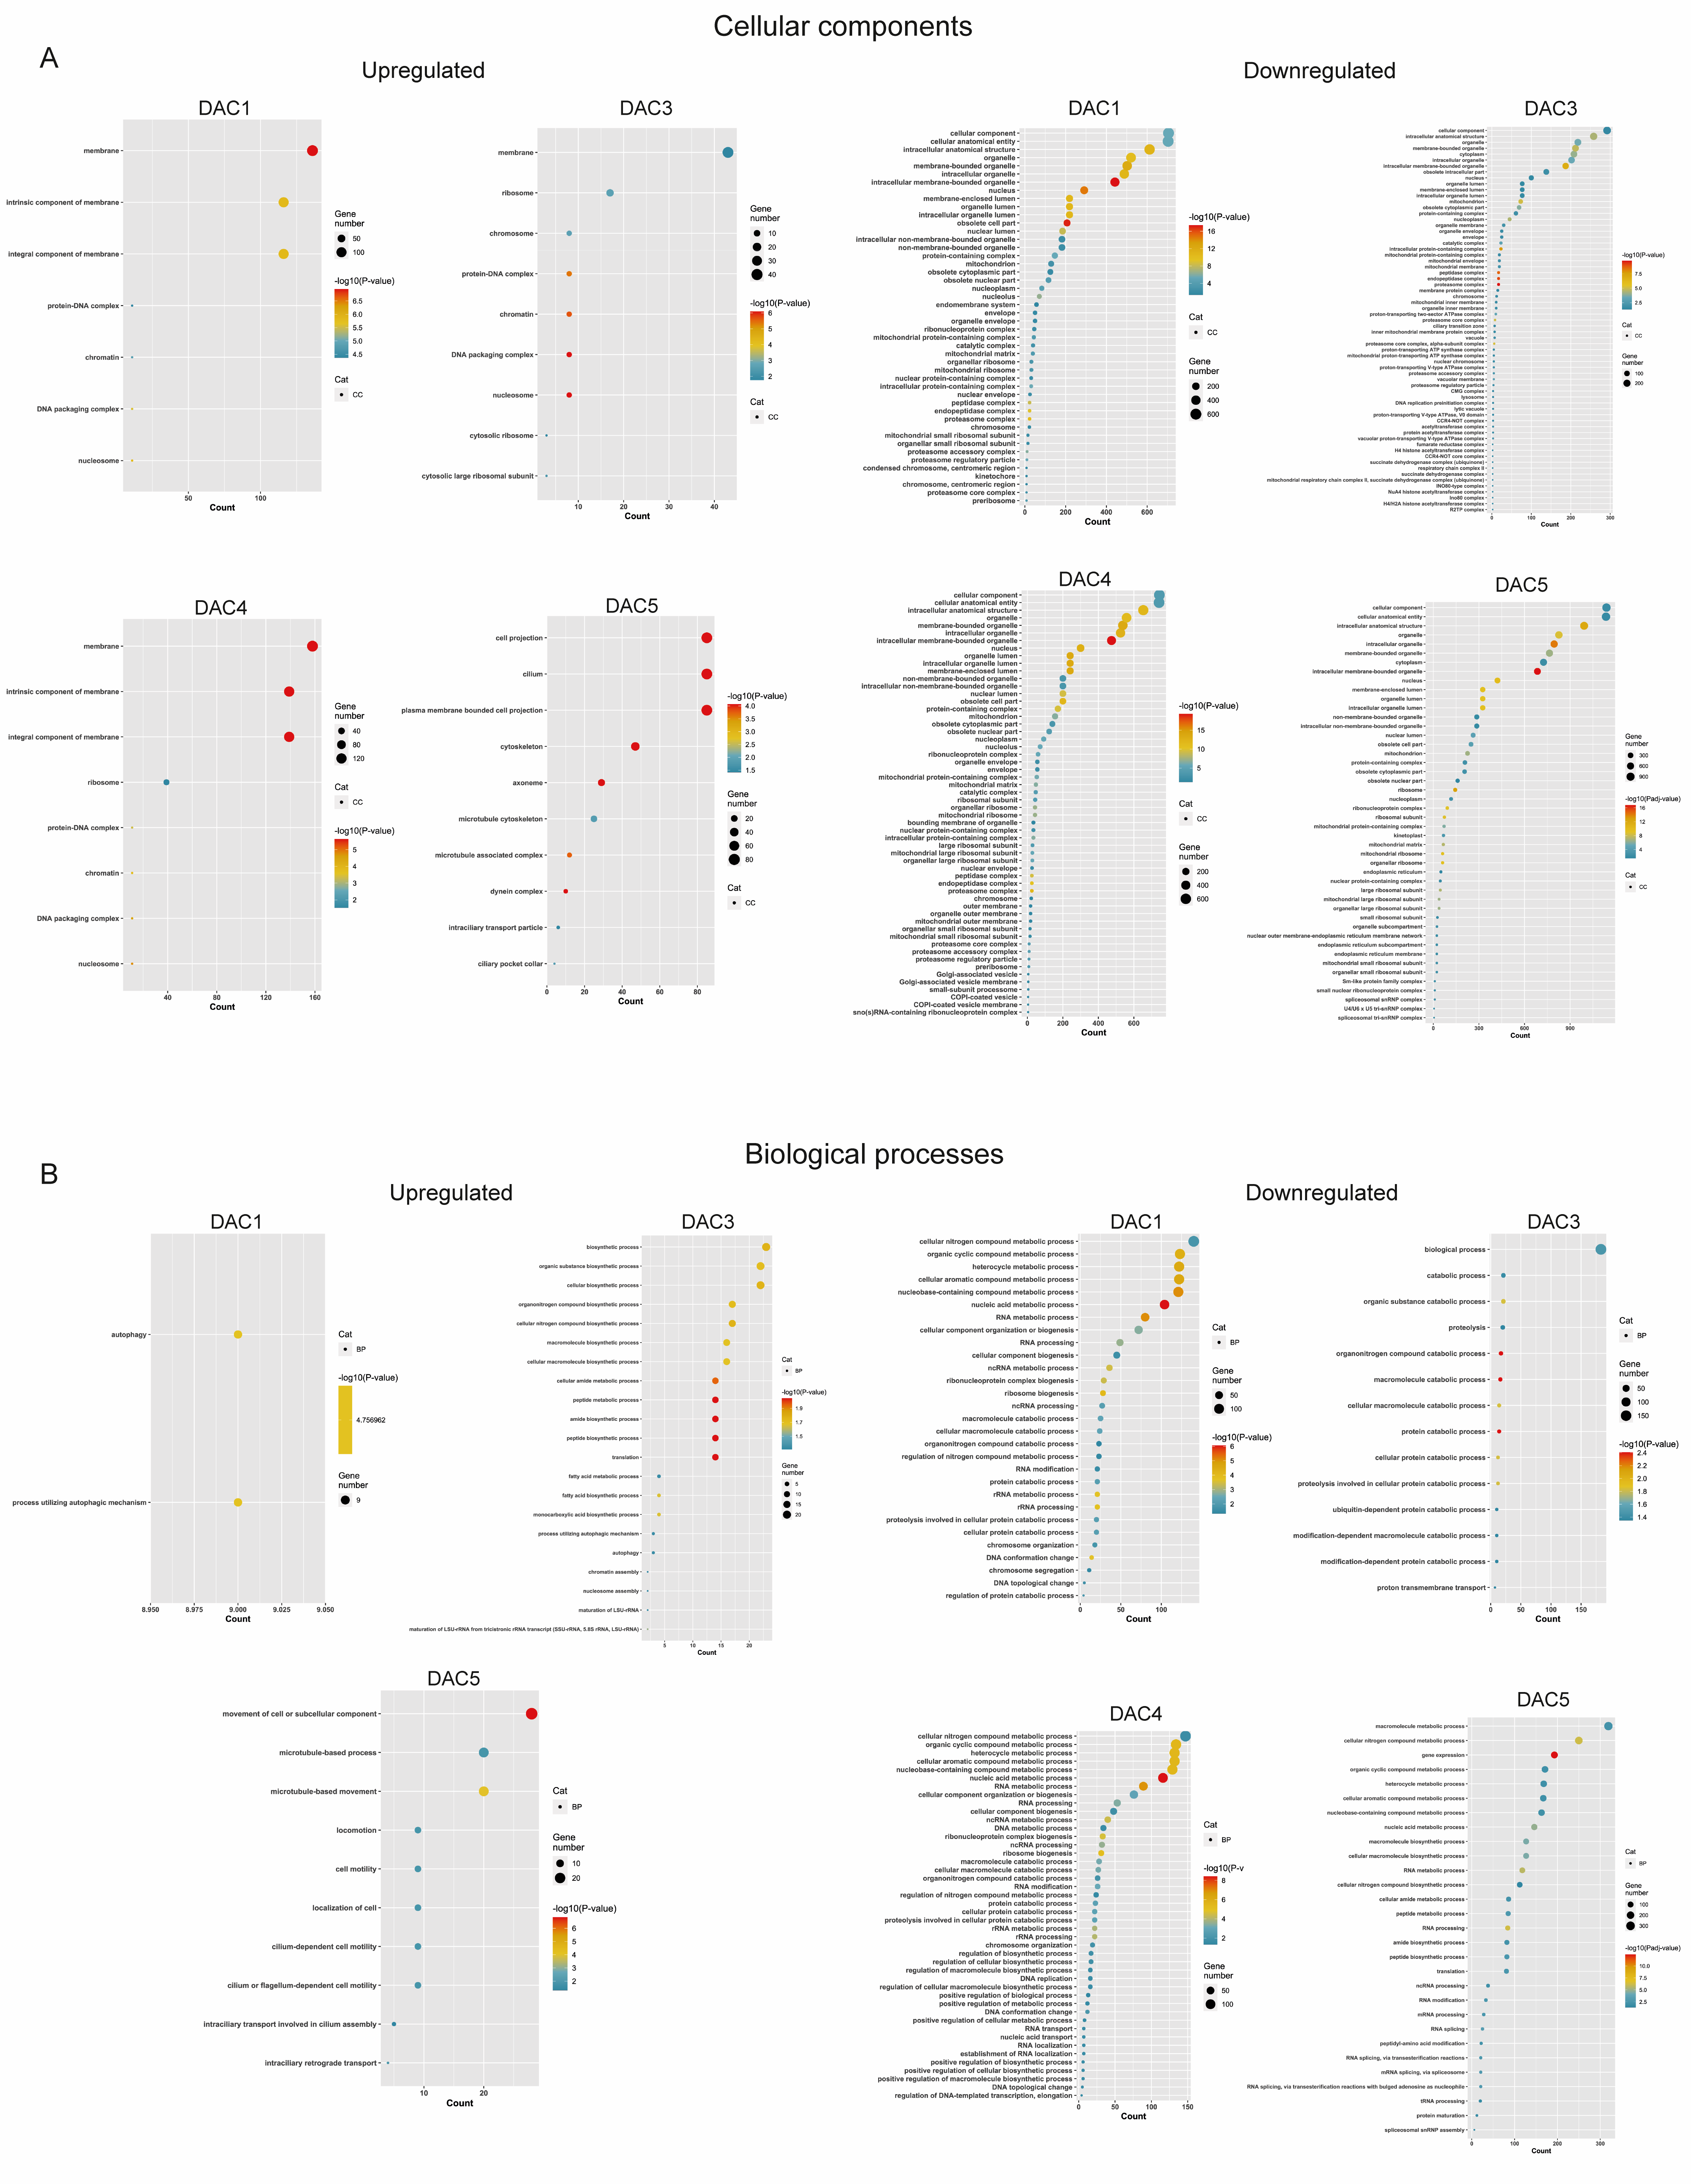
**

**Supplementary Data 10. Gene Ontology (GO) enrichment analysis of differentially expressed genes (DEGs) in DAC mutants.** **A.** GO enrichment analysis for the "Cellular Component (CC)" category. Bubble charts show enriched CC terms for upregulated and downregulated genes in each *L. mexicana* DAC mutant. **B.** GO enrichment analysis for the "Biological Process (BP)" category. Bubble charts show enriched BP terms for upregulated and downregulated genes in each *L. mexicana* DAC mutant. For these analyses it was considered a *p*-value cutoff of ≤0.05.

**
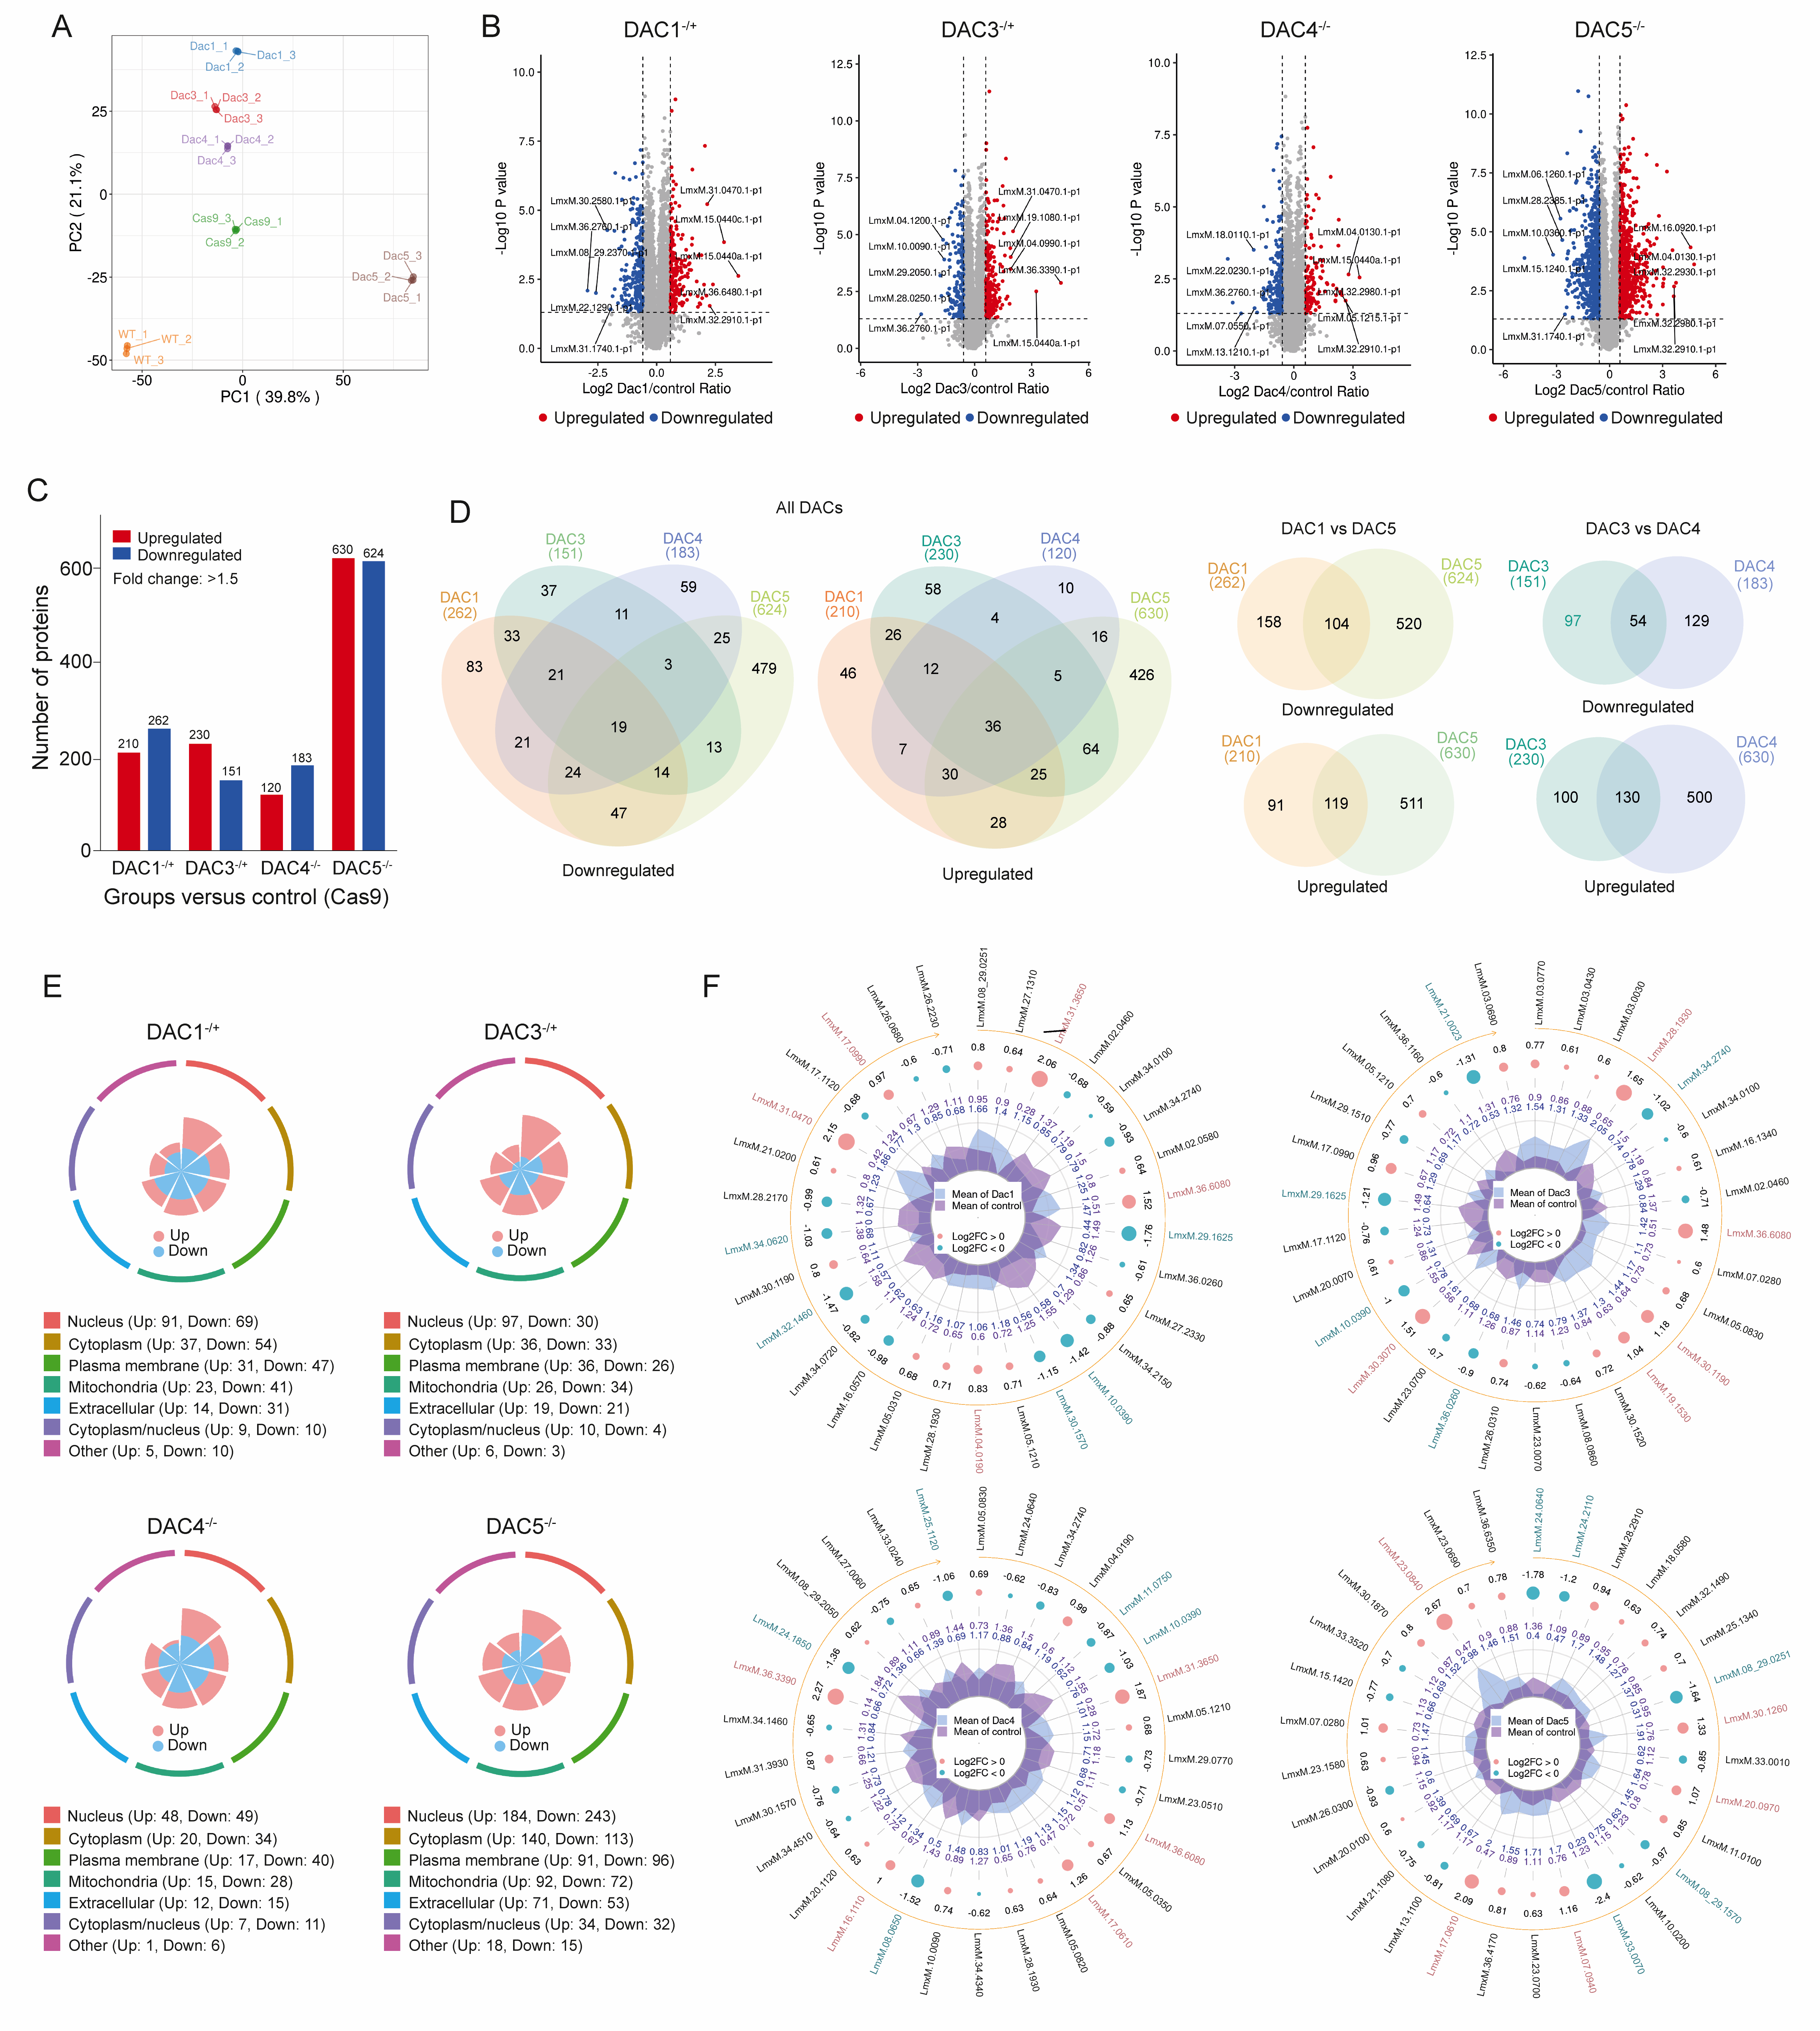
**

**Supplementary Data 11. Quantitative proteome of DAC mutants.** **A.** Principal component analysis (PCA) of the total protein samples of DACs mutants and parental cells. **B.** Volcano plot of differentially expressed proteins (log2(FC) >1.5 and FDR <0.05) of DACs mutants compared to Cas9 cells. **C.** Number of differentially expressed proteins (DEPs) in each DAC mutant compared to parental cell. **D.** Venn diagrams comparing the DEPs among DACs mutants and Cas9. **E.** Cellular compartment distribution of DEPs of each DACs mutant. **F.** Dynamic radar plot of Top30 DEPs found in each DAC mutant compared to Cas9. The downregulated proteins are identified as green circles and the upregulated proteins as salmon circles. The top5 down and upregulated proteins are identified in green and salmon in each dynamic radar.

**
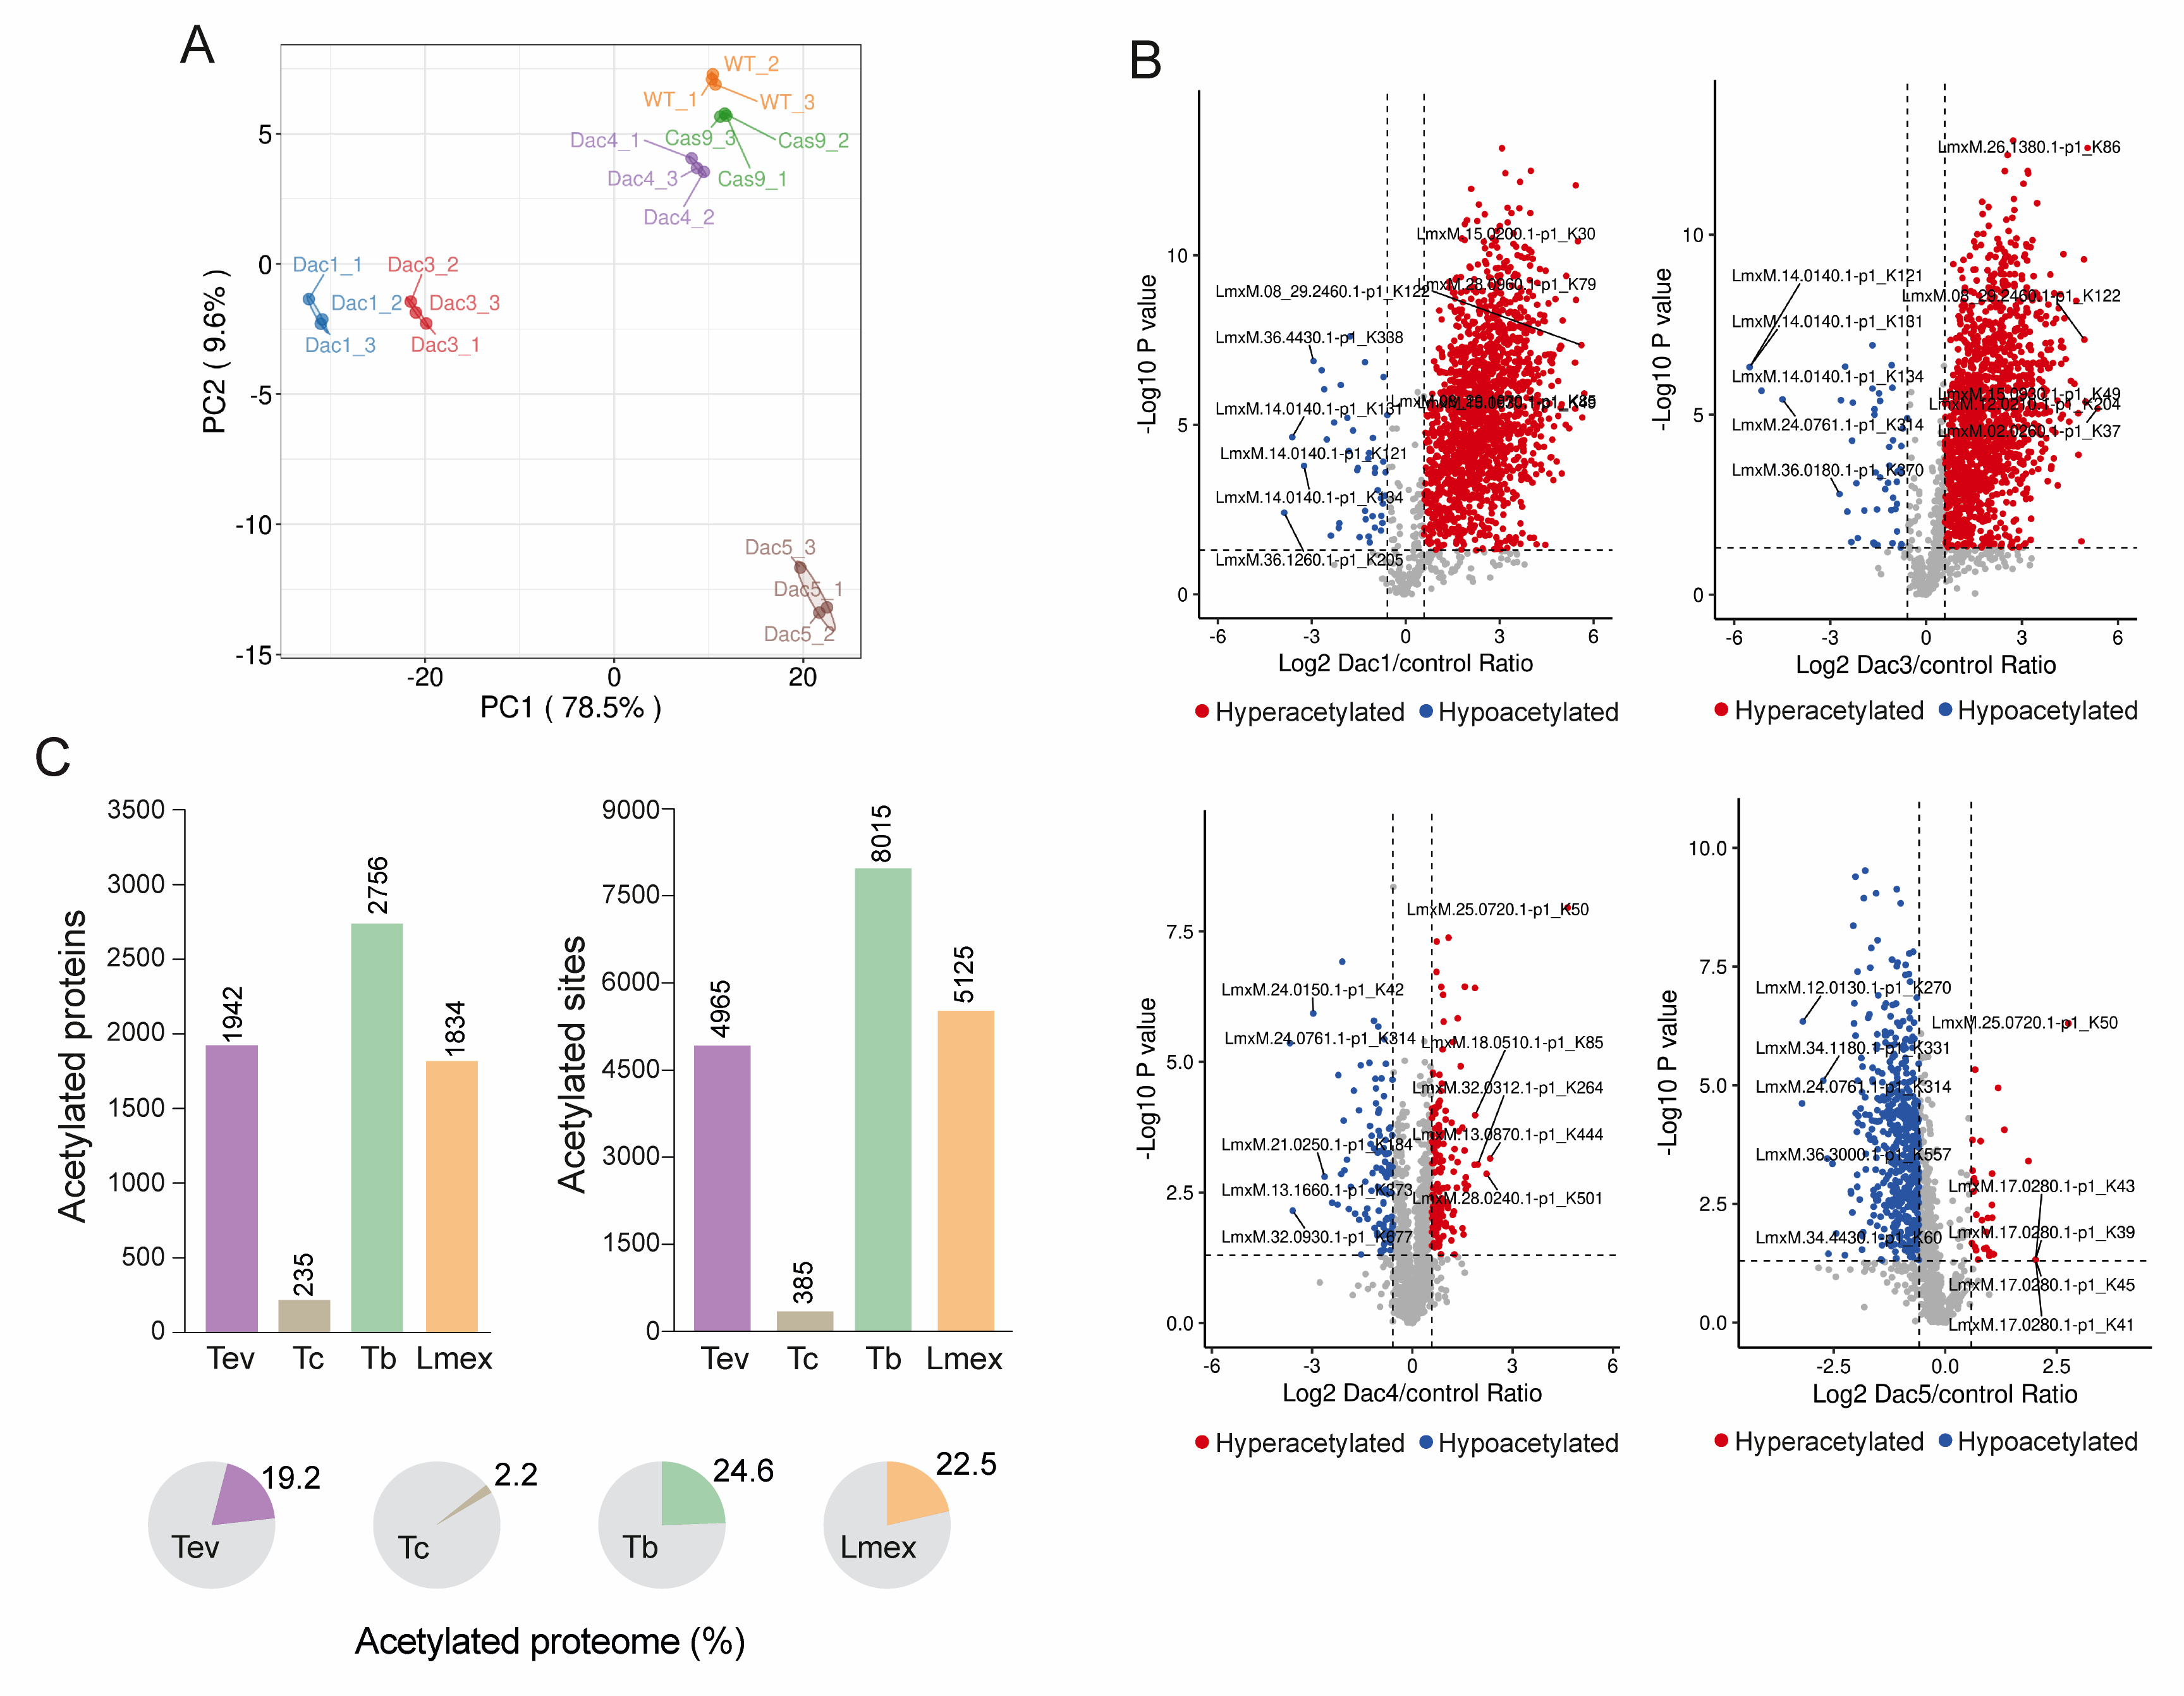
**

**Supplementary Data 12. Quantitative acetylome of DAC mutants.** **A.** Principal component analysis (PCA) of the Kac protein samples of DACs mutants and parental cells. **B.** Volcano plot of differentially acetylated proteins (log2(FC) >1.5 and FDR <0.05) of DACs mutants compared to Cas9 cells. **C.** The number of Kac proteins (left panel) and Kac sites (right panel) detected from *Trypanosoma evansi* (Tev) *Trypanosoma brucei* (Tb), *Trypanosoma cruzi* (Tc), and *L. mexicana* (Lmex). The percentage of acetylated proteomes over their respective total predicted proteomes is showed in the bottom panel.


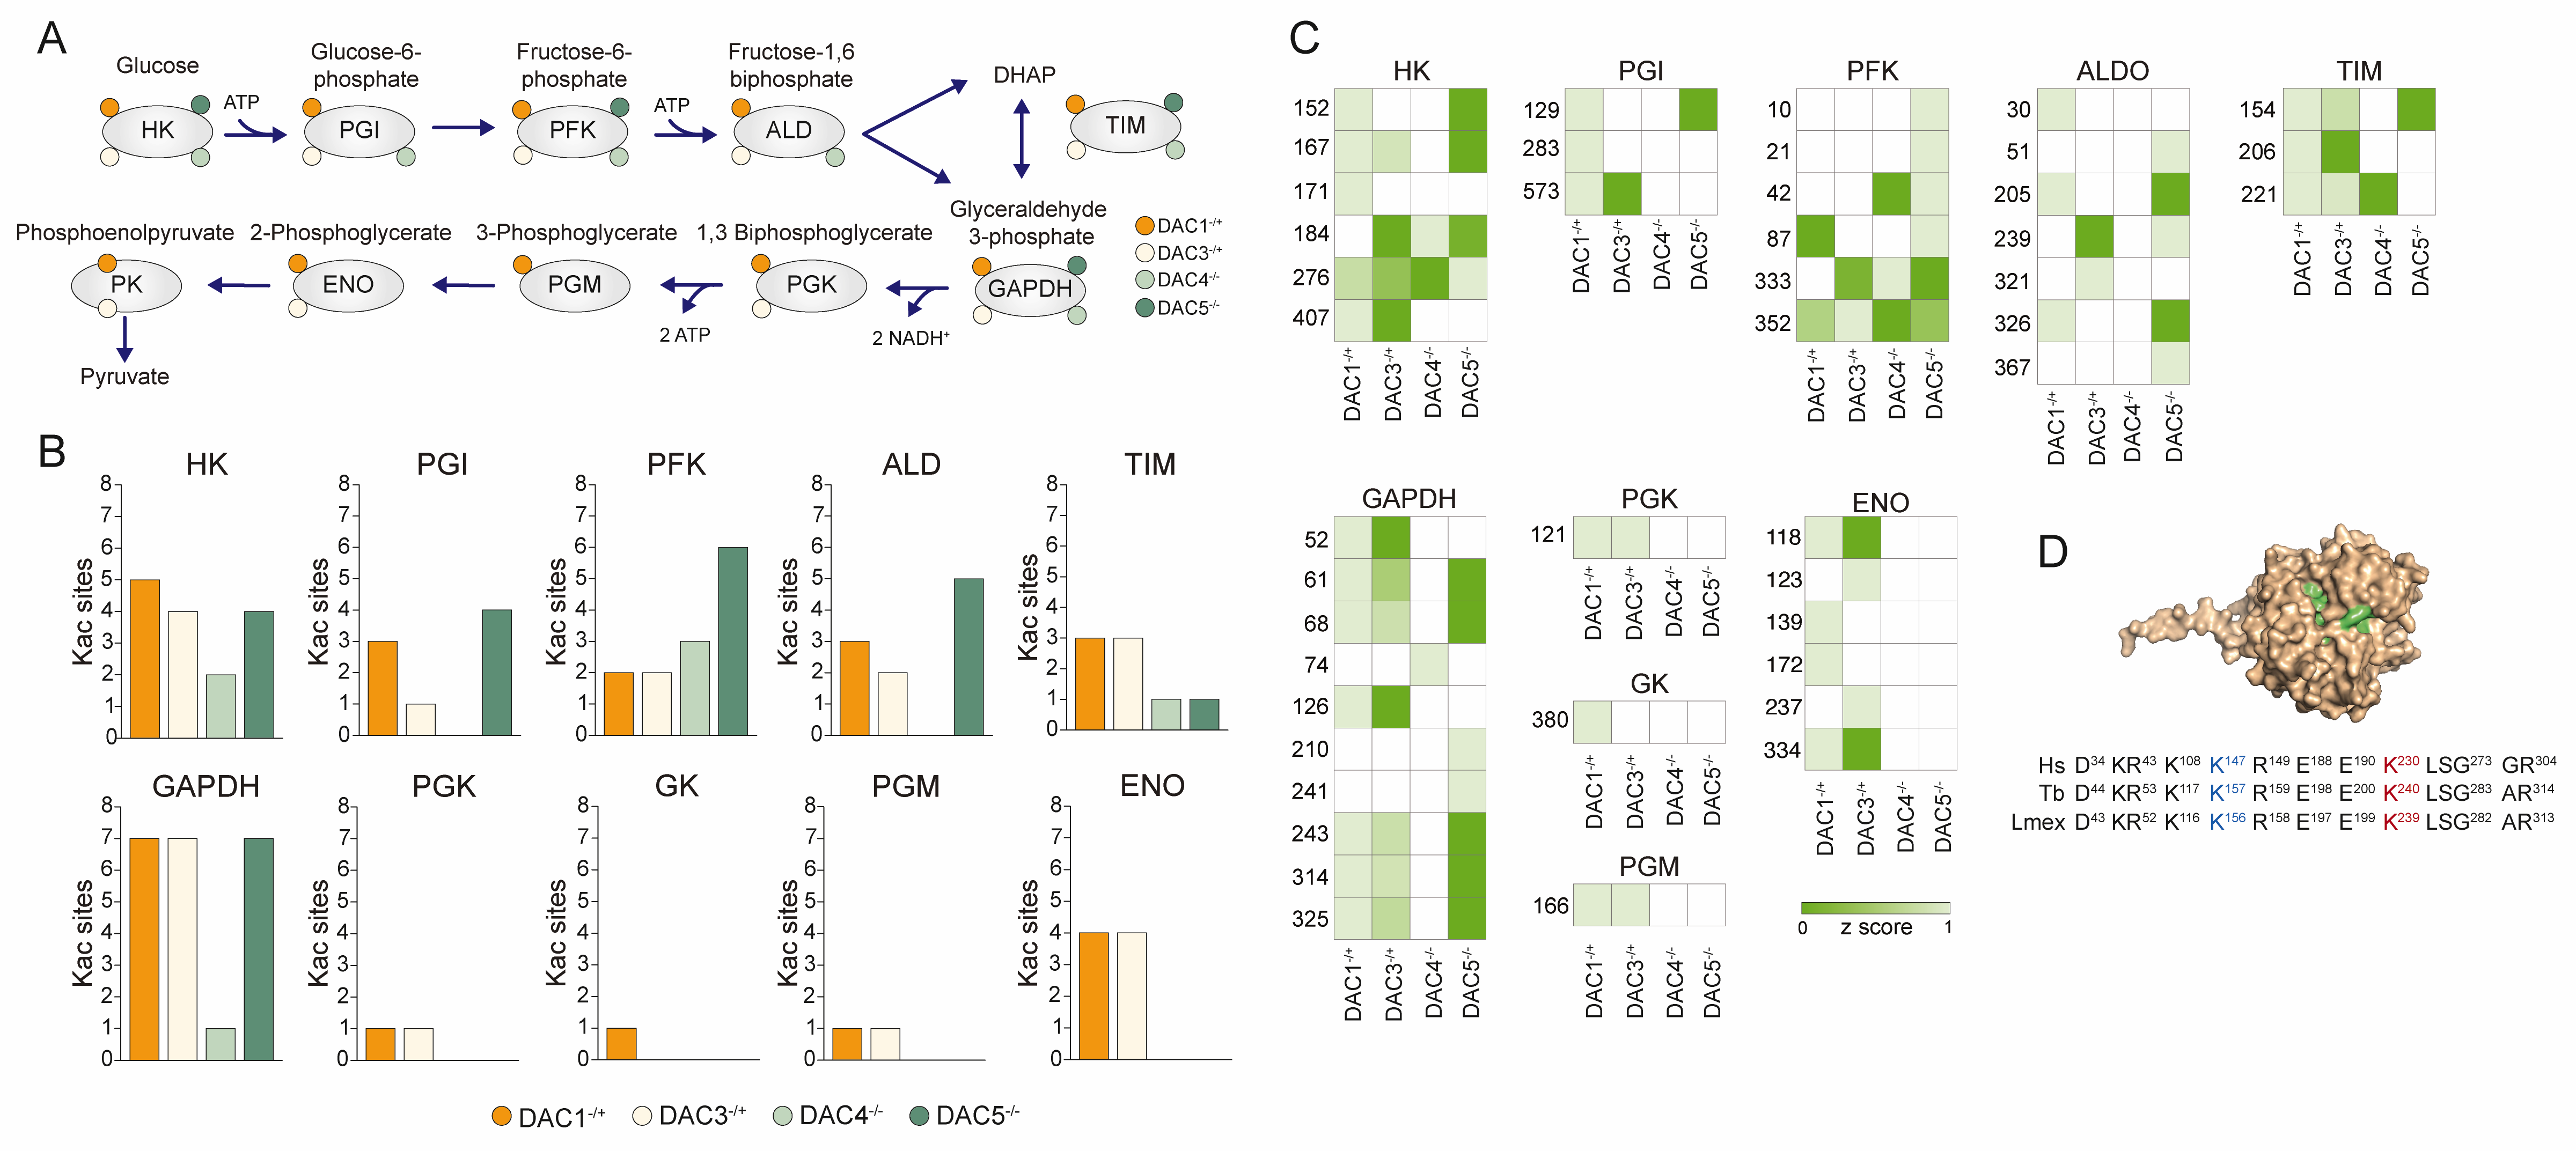


**Supplementary Data 13. Protein acetylation in glycolytic enzymes of DAC mutants. A.** Schematic representation of the Embden–Meyerhof pathway in *L. mexicana*, showing acetylation sites detected in each DAC mutant. Colored circles indicate the presence of acetylation on specific glycolytic enzymes; enzymes were considered acetylated if at least one Kac site was identified. Hexokinase (HK); glucose phosphate isomerase (PGI); phosphofructokinase (PFK); fructose 1,6-biphosphate aldolase (ALD); triose phosphate isomerase (TIM); glyceraldehyde 3-phosphate dehydrogenase (GAPDH); phosphoglycerate kinase (PGK); phosphoglycerate mutase (PGM); enolase (ENO); pyruvate kinase (PK). **B.** Number of Kac sites detected per glycolytic enzyme in each DAC mutant. **C.** Quantitative acetylation levels for each lysine site identified across all glycolytic enzymes and DAC mutants. **D.** *L. mexicana* ALD protein structure (PDB: 2QAP) with residues critical for enzymatic activity highlighted in green. Conserved lysine residues potentially involved in activity regulation are shown in comparison to human (Hs) and *T. brucei* (Tb) homologs (lower panel).

**
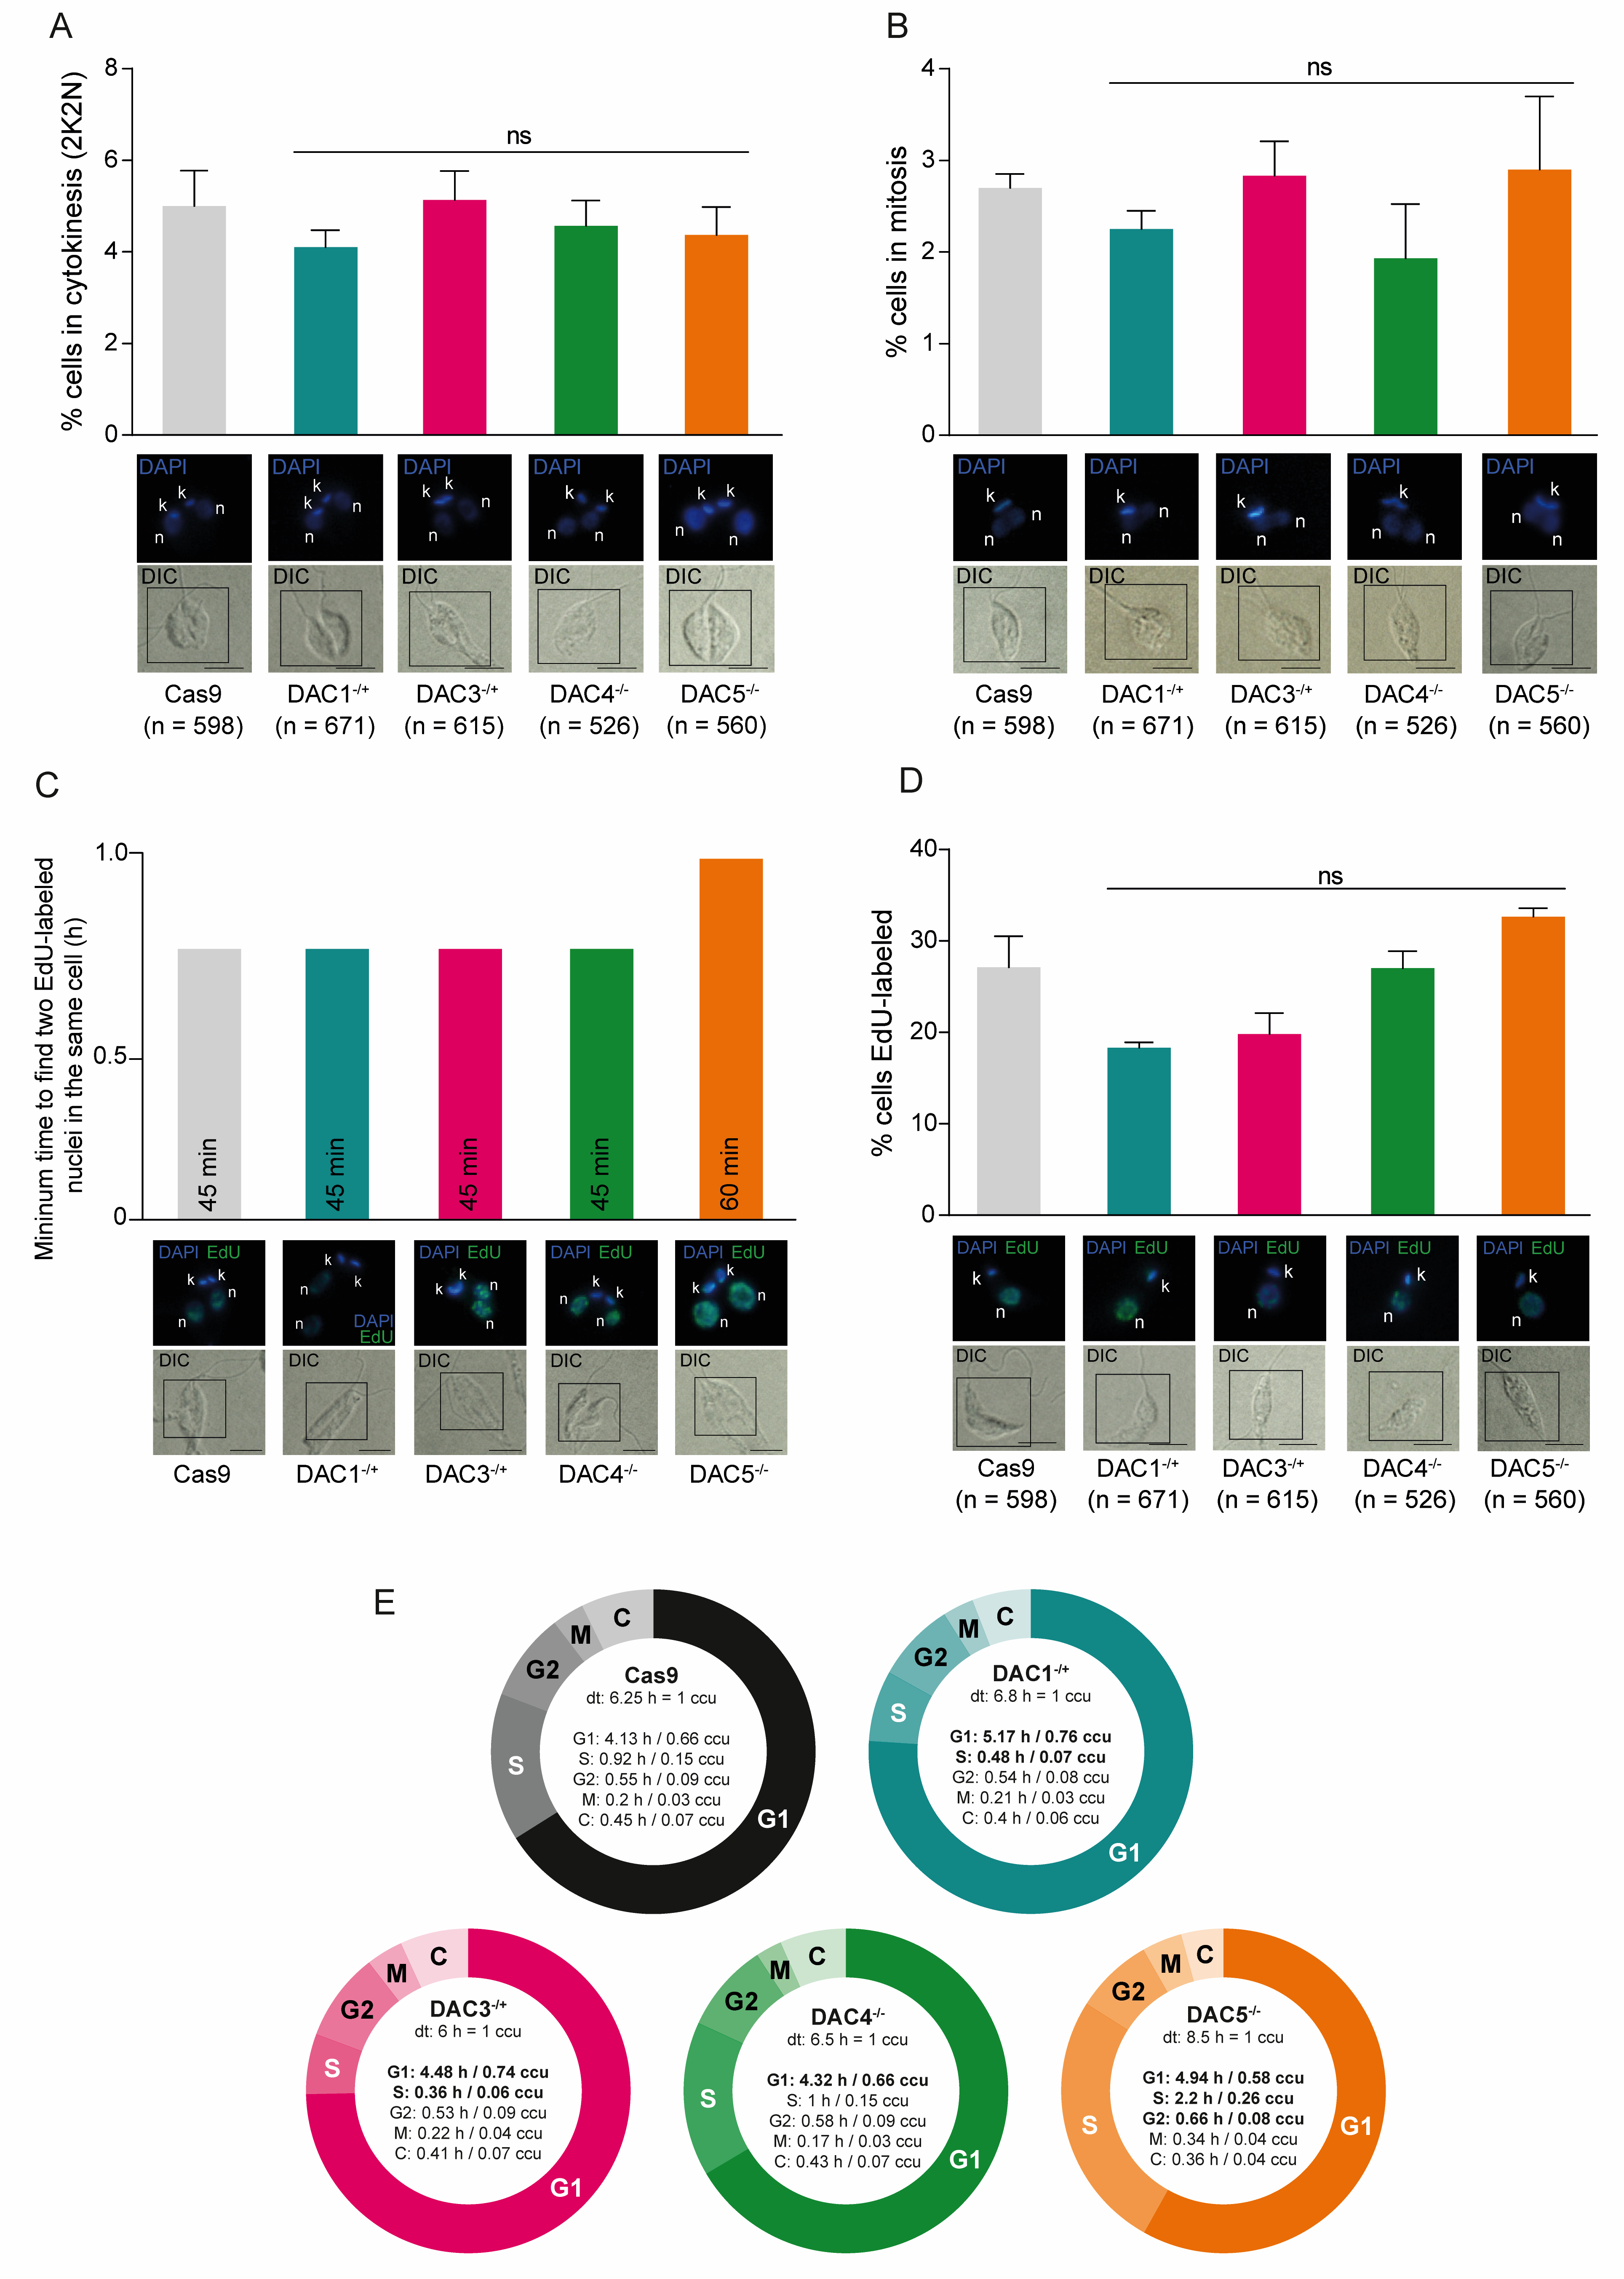
**

**Supplementary Data 14.** **Estimation of the cell cycle phase lengths of DACs mutants**. **A**. DAPI-labeled parasites (2N2K) were used to measure the percentage of parasites in cytokinesis. **B**. Parasites with nuclei in division but not yet segregated were used to estimate the proportion of parasites performing mitosis. **C**. To estimate the duration of the G2+M phases, EdU was added to the culture, and parasites were continuously collected every 15 min until parasites containing two EdU-labeled nuclei in the same cell (cytokinesis) were observed. This pattern was observed after 45 min for all lineages except for DAC5-/-, which was observed after 60 min. This assay was carried out in triplicate, and in all replicates, we found a parasite containing two EdU-labeled nuclei simultaneously. **D**. EdU-labeled parasites (after 1 h EdU pulse) were used to estimate the percentage of parasites able to uptake this thymidine analog. Error bars in the graphs (A-D) represent the SD. NS = not significant, i.e., p > 0.05. The scale bars on the representative images (A-D) correspond to 10 µm. K = kinetoplast and N = nucleus. The values in each graph (A-D) represent the average of three independent assays. The number of the cells analyzed (n) is shown for each lineage. **E**. The measured parameters (A-D) were inserted in the CeCyD software to estimate the duration of the cell cycle phases (G1, S, G2, M, and C) for each lineage analyzed. dt = doubling time; ccu = cell cycle unit.
